# Supplementary material for: Multiplexed immunosensing of cancer biomarkers on a split-float-gate graphene transistor microfluidic biochip
Source: Royal Society of Chemistry journal article supplement (doi:10.1039/d3lc00709j), 2023-12-05
Supplement: d3lc00709j1.pdf [file d3lc00709j1.pdf]

## **ELECTRONIC SUPPLEMENTARY INFORMATION**

### ***Multiplexed immunosensing of cancer biomarkers on a split-float-gate graphene transistor microfluidic biochip***

Cheng Wang, Tao Wang, Yujing Gao, Qiya Tao, Weixiang Ye, Yuan Jia, Xiaonan Zhao, Bo Zhang, and Zhixing Zhang

#### **CONTENTS**

|   |                                                                          |     |
|---|--------------------------------------------------------------------------|-----|
| 1 | Device fabrication protocol.....                                         | 2   |
| 2 | Biochemical functionalization protocol (single biomarker).....           | 4   |
| 3 | Dataset of GFET transport characteristics (single biomarker).....        | 6   |
| 4 | Kinetic process measurement protocol (single biomarker).....             | 7   |
| 5 | Dataset of kinetic process measurements (single biomarker) .....         | 9   |
| 6 | Dataset of cross-reaction measurements .....                             | 34  |
| 7 | Multiplexed immunosensing protocol (three biomarkers in PBS/serum) ..... | 83  |
| 8 | Dataset of multiplexed immunosensing (three biomarkers in PBS) .....     | 85  |
| 9 | Dataset of multiplexed immunosensing (three biomarkers in serum).....    | 186 |
|   | References.....                                                          | 287 |

# 1 Device fabrication protocol

The batch fabrication of split-float-gate graphene electric field-effect transistor (GFET) devices (288 devices on a 4-inch wafer) employed the standard CMOS techniques, such as ultraviolet photolithography, atomic layer deposition (ALD), ion implantation and metal deposition<sup>1</sup>. The photolithographic operations used the double-layer lift-off technique (100 nm LOR 1A/1.3  $\mu\text{m}$  positive photoresist AZ 601). The HfO<sub>2</sub> dielectric layers was grown using tetrakisethylmethylamidohafnium (TEMAH) [(CH<sub>3</sub>)(C<sub>2</sub>H<sub>5</sub>)N]<sub>4</sub>Hf and oxidant O<sub>3</sub>. The key steps (**Figure S1**) are listed as follows:

- 1) A boron-doped *p*-type silicon wafer ( $n_{\text{h}} = 2 \times 10^{16} \text{ cm}^{-3}$ ) coated by 100 nm SiO<sub>2</sub> is used as a substrate (**Figure S1a**). To create the local *n*<sup>+</sup>-type silicon bottom-gate electrodes complementary to the *p*-type substrate, the photolithographic patterning is carried out. After the patterning development, the implantation of phosphor ions is executed with a beam density of  $10^{15} \text{ cm}^{-2}$ , and a scanning energy of 150 keV. The phosphor-doped electron concentration is designed as  $n_{\text{e}} = 10^{18} \text{ cm}^{-3}$ . After a rapid annealing at 1050 °C for 30 s, the local *n*<sup>+</sup>-type bottom-gate electrodes are created (**Figure S1b**). The depth of back-gate electrodes is approximately 500 nm.
- 2) The subsequent steps of photolithographic patterning and BOE etching are carried out to locally remove the SiO<sub>2</sub> layer and expose the bottom-gate electrodes and pads (**Figure S1c**).
- 3) After a thorough cleaning in oxygen plasma (800 mTorr, 950 mW, 3 min), the wafer is then undergone the ALD growth of 15 nm bottom-gate HfO<sub>2</sub> dielectric layer (**Figure S1d**). TEMAH and O<sub>3</sub> reacting at 120 °C form an isotropic HfO<sub>2</sub> layer<sup>2, 3</sup>.
- 4) The monolayer chemical vapor deposition (CVD) graphene is transferred on the bottom-gate HfO<sub>2</sub> layer. Then, another photolithographic step is carried out to pattern the graphene sheet into rectangle conducting channels (10  $\mu\text{m} \times 50 \mu\text{m}$ ) overlying corresponding bottom-gate electrodes (**Figure S1e**). Oxygen plasma etching is used to remove the unwanted graphene.
- 5) A separate photolithographic patterning and metal deposition process are executed (**Figure S1f**), in order to define the drain/source electrodes and pads that are made of 5 nm/45 nm Cr/Au.
- 6) A 10 nm top-layer HfO<sub>2</sub> is grown to complete the encapsulation of graphene conducting channels. To avoid the global overlay of HfO<sub>2</sub> on the drain/source electrodes, a photolithographic step is carried out prior to the second ALD growth (**Figure S1g**). After the patterning development and the top-layer HfO<sub>2</sub> lift-off, the metal pads of drain/source electrodes are exposed.
- 7) Finally, the split-float-gate electrodes and pads made of Cr/Au (5 nm/45 nm) are defined using photolithographic patterning and metal deposition. As shown in **Figure S1h**.

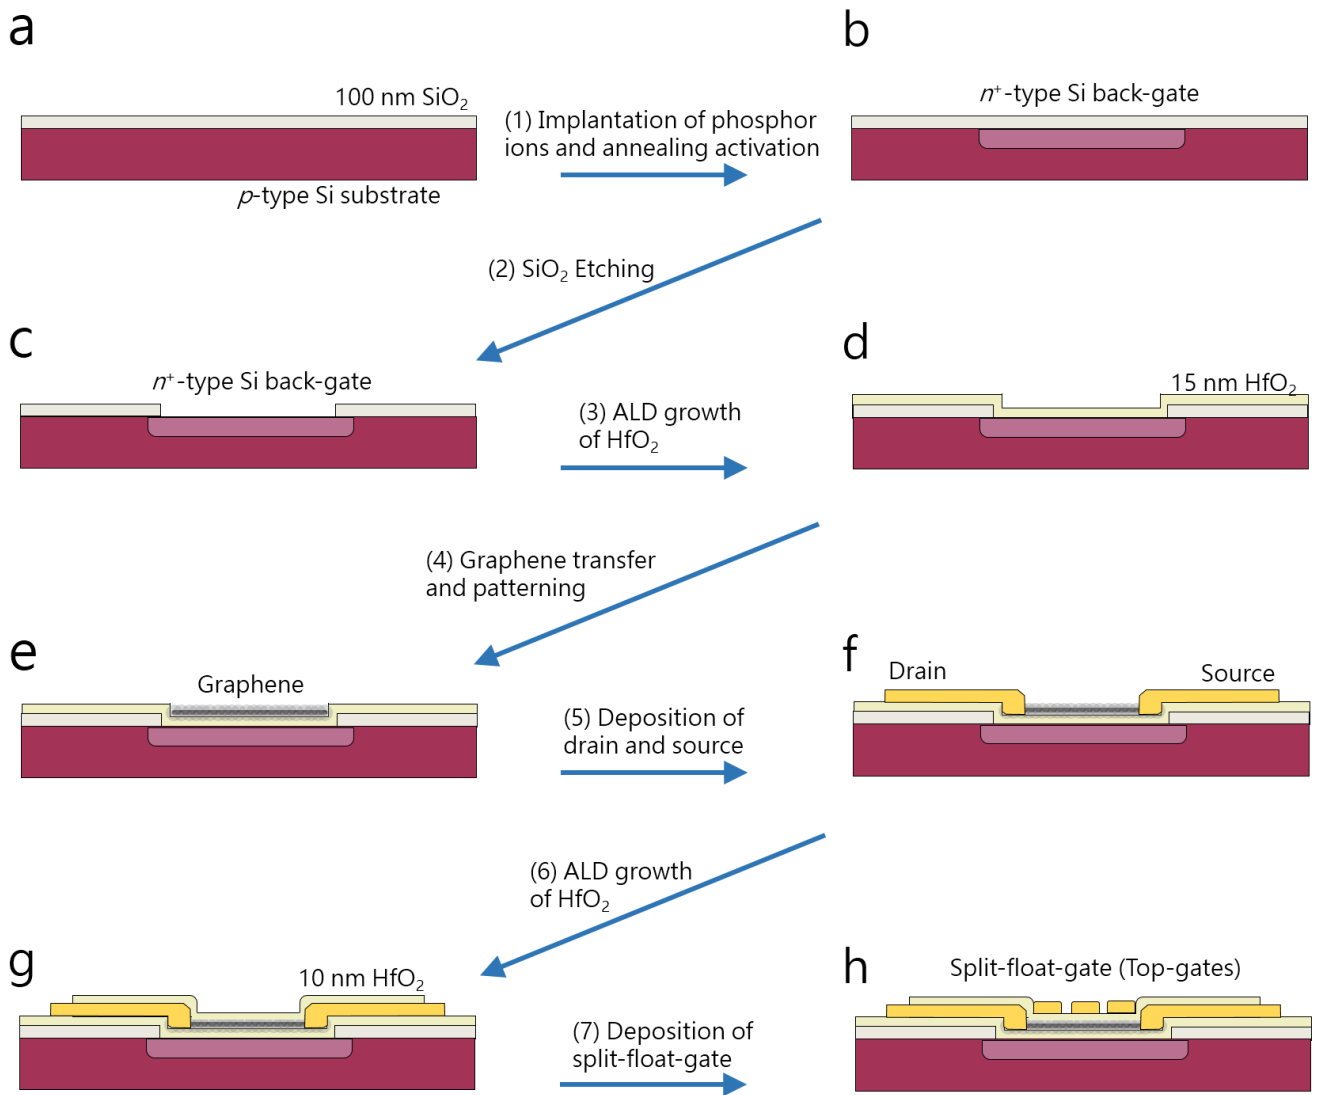

**Figure S1.** Fabrication protocol of GFET devices. A  $100\text{ nm SiO}_2/\text{Si}$  wafer (a) used as the  $p$ -type substrate is implanted by phosphor ions to create the local  $n^+$ -type back-gate electrodes (b). After the removal of  $\text{SiO}_2$  scattering layer above the back-gate electrodes (c), a layer of  $15\text{ nm HfO}_2$  is grown by ALD (d). The monolayer CVD graphene sheet is transferred and patterned into graphene channels (e). By depositing drain and source electrodes (f), and growing a layer of  $10\text{ nm HfO}_2$ , the graphene channels are encapsulated (g). After the final deposition of the split-float-gate, and the large electrode pads, the FSS-GFET devices (h) are completed.

## 2 Biochemical functionalization protocol (single biomarker)

The chemical reagents including N-(3-dimethylaminopropyl)-N'-ethylcarbodiimide hydrochloride (EDC), N-hydroxysuccinimide (NHS), 4-mercaptobenzoic acid (MBA), methanol, and ethanolamine were purchased from Sigma-Aldrich (Shanghai, China). The biological materials including carcinoembryonic antigen (CEA),  $\alpha$ -fetoprotein (AFP), and parathyroid hormone (PTH), and corresponding mouse monoclonal antibodies were purchased from Sangon Biotech (Shanghai, China). The  $1 \times$  phosphate-buffered saline (PBS, ionic strength 150 mM, pH 7.2) used as the solvent was purchased from Life Technologies (Shanghai, China). The human serum used as the solvent was purchased from Sigma-Aldrich (Shanghai, China).

To verify the immunoaffinity signaling capability of CEA, AFP and PTH, the GFET transfer characteristic curves were measured in-situ using a microfluidic system, as shown in **Figure S2**. The procedures of biochemical functionalization (including electrical measurement) are presented as follows<sup>4</sup>. During each transfer characteristic curve measurement, the drain voltage was  $V_{ds} = 100$  mV, and the gate voltage  $V_{gs}$  scanning uniformly adopted the backward direction ( $5$  V  $\rightarrow$   $0$  V) with a certain velocity  $v = 1$  V s<sup>-1</sup>.

- 1) We first syringe the PBS solution to cover three top-gate pads, and then measure the GFET transfer characteristic curve ( $I_d$  vs  $V_{gs}$ ) in this step (before biochemical functionalization) to record the pristine state.
- 2) The PBS solution is removed for the next step of linker immobilization. A  $200 \mu\text{M}$  4-mercaptobenzoic acid (MBA) solution (in methanol) is syringed for a 2 h incubation to achieve the thiol-linker immobilization on three pads. Then, an aqueous solution mixing  $1$  mM N-(3-dimethylaminopropyl)-N'-ethylcarbodiimide hydrochloride (EDC) and  $20$  mM N-hydroxysuccinimide (NHS) is syringed into the microfluidic channel for 3 h, to form the MBA-NHS linkers on three gold top-gate pads. We DO NOT record the GFET transfer characteristic curve in this step.
- 3) After rinsing with PBS, the immobilization of antibody molecules (anti-CEA, -AFP or -PTH) on three pads is achieved by syringing an antibody solution ( $1 \mu\text{M}$ ) for 2 h. After rinsing with PBS, an ethanolamine solution ( $100$  mM) is introduced to deactivate excessive NHS-groups (1 h incubation). In this step, the GFET transfer characteristic curve is measured to verify the successful antibody immobilization.
- 4) After rinsing with PBS, the capturing of biomarker molecules (CEA, AFP or PTH) is achieved by syringing a high-concentration biomarker solution ( $1 \mu\text{M}$ ) for 10 min. Then, the GFET transfer characteristic curve of the biomarker-laden stage is measured. By recording three curves of the steps 1), 3) and 4), and comparing with each other, the immunoaffinity signaling capability can be demonstrated by the identifiable curve shifts.

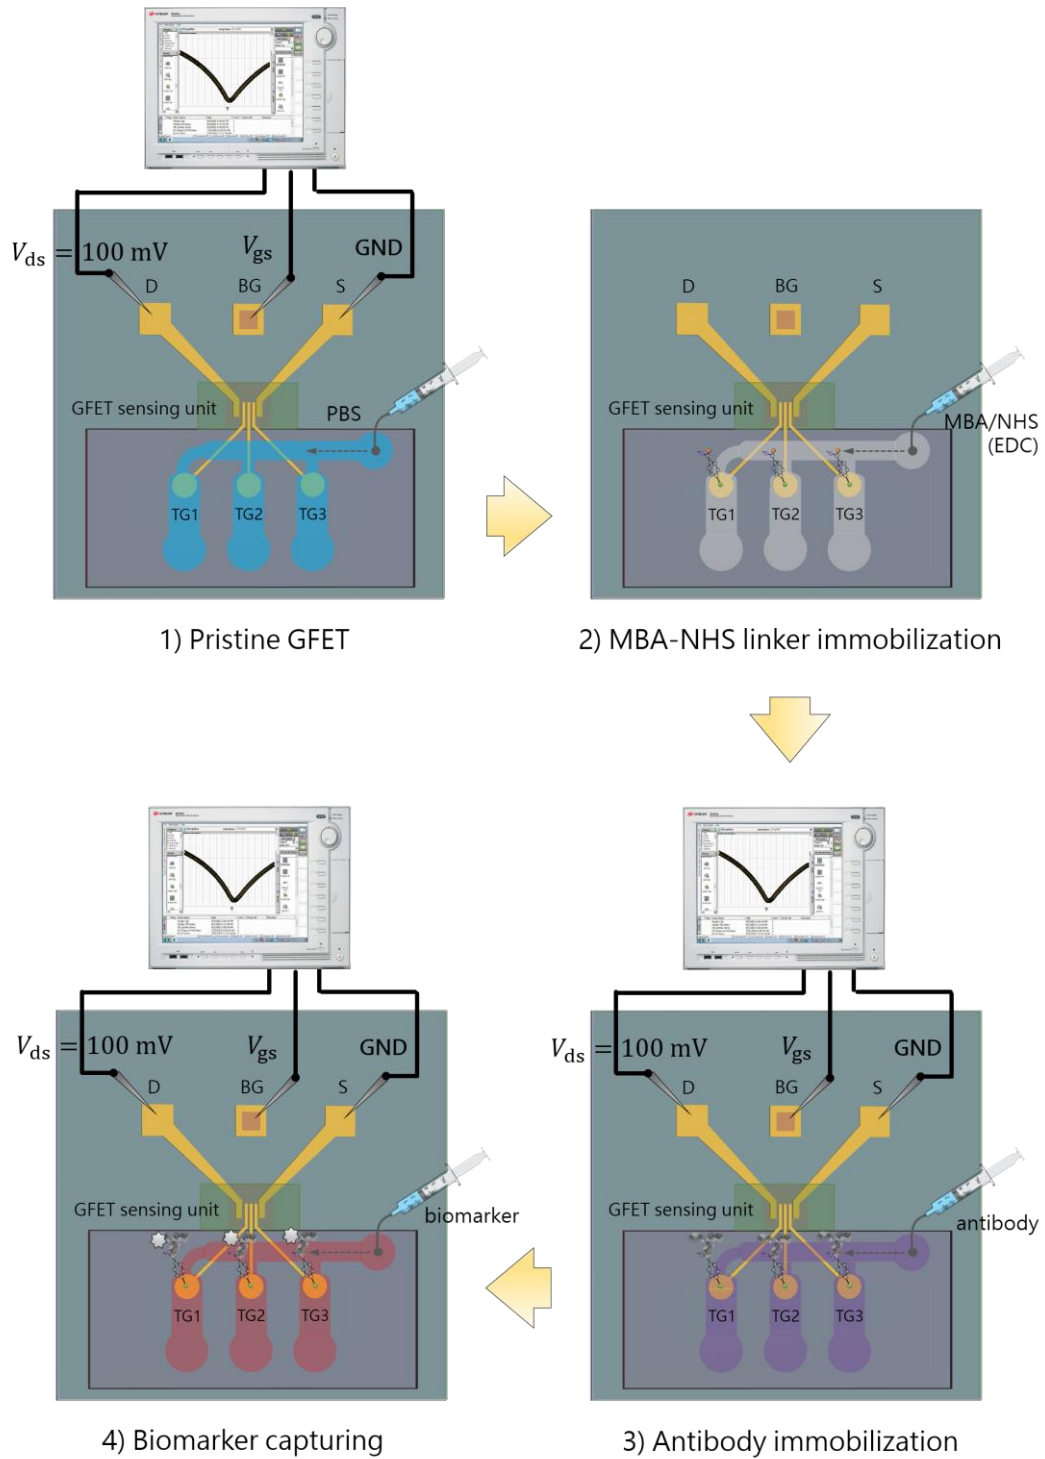

**Figure S2.** Biochemical functionalization and electrical measurement protocols for verifying the signaling capability of (single) biomarker immunoaffinity. For each biomarker (CEA, AFP or PTH), the antibody molecules are immobilized on TG1, TG2 and TG3, and the high-concentration biomarker solution is introduced to fully occupy the antibody molecules. Three GFET transfer characteristic curves ( $I_d$  vs  $V_{gs}$ ) corresponding the steps 1), 3) and 4) are measured.

### 3 Dataset of GFET transport characteristics (single biomarker)

Following the experimental protocol in **Section 2**, the GFET transfer characteristic curves belonging to the immunoaffinity of CEA, AFP and PTH were measured, respectively. As shown in **Figure S3**, for each biomarker, 3 GFET devices were disposably used to triplicate the measurements (device #T1 – #T9).

In **Figures S3a – S3c**, the CEA-induced GFET transfer characteristic curve shifts are basically identical to each other, which demonstrate the bioelectronic signaling capability and suggest the device-to-device uniformity of out batch-made GFET devices. Correspondingly, in **Figures S3d – S3f** and **Figures S3g – S3i**, the GFET transfer characteristic curve shifts induced by AFP and PTH exhibit similar results. In the main text, **Figures S3a, S3d and S3g** are presented as the representative results (**Figures 2a, 2c and 2e**).

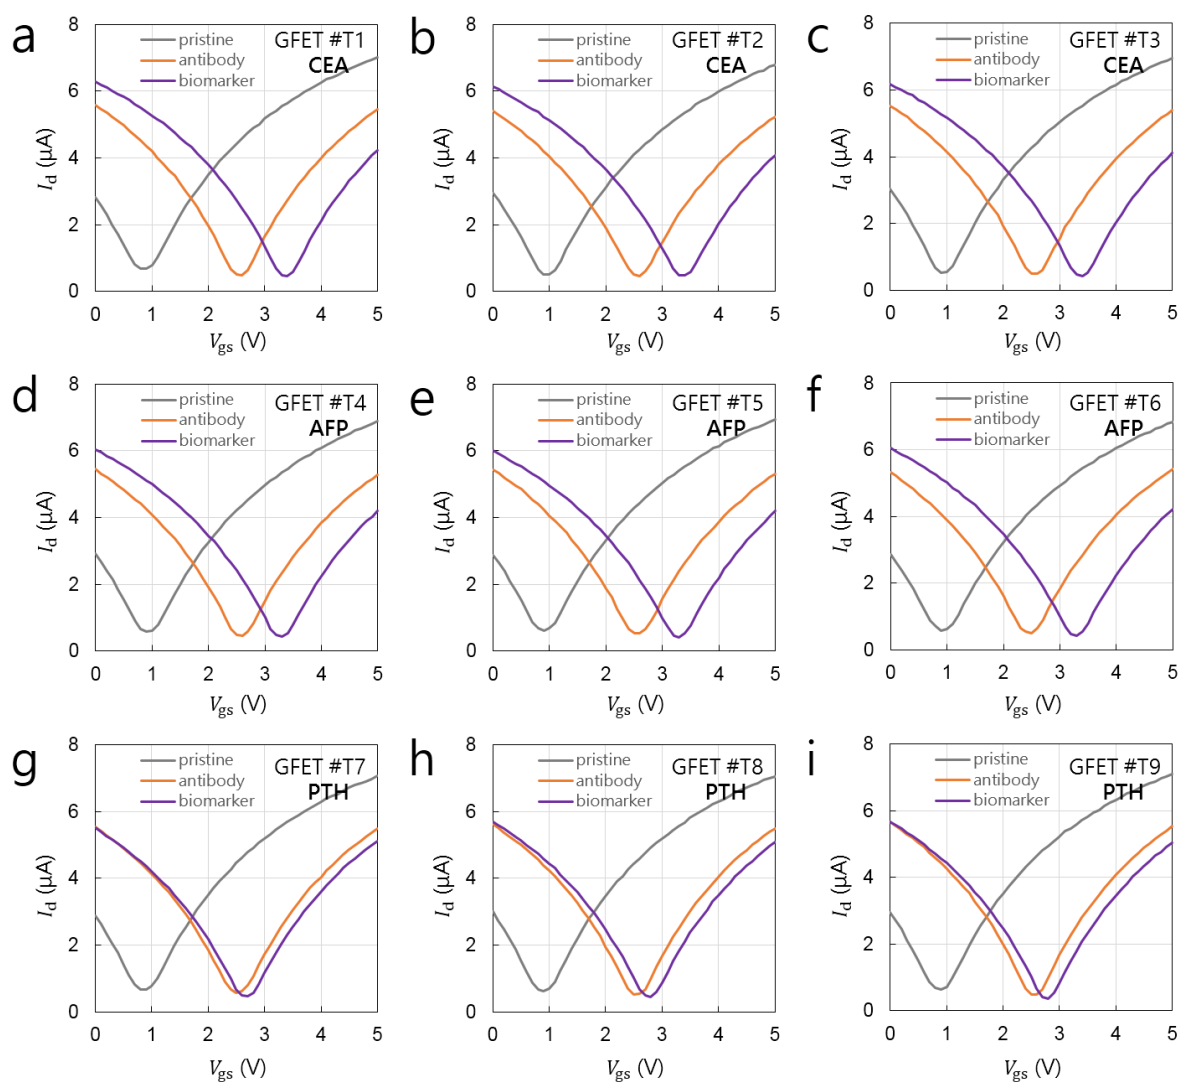

**Figure S3.** GFET Transfer characteristic curves verifying the signaling capability of (single) biomarker immunoaffinity. (a) – (c) Triplicated experimental results of CEA immunoaffinity. (d) – (f) Triplicated experimental results of AFP immunoaffinity. (g) – (i) Triplicated experimental results of PTH immunoaffinity.

#### 4 Kinetic process measurement protocol (single biomarker)

To estimate the immunoaffinity kinetic parameters of CEA, AFP and PTH, the kinetic processes corresponding to various concentrations of biomarker were measured. During each measurement, the GFET device was disposablely used. The procedures of biochemical functionalization (including electrical measurement) are presented as follows. As shown in **Figure S4**, steps 1), 2) and 3) are same to those in **Figure S2**. In particular, the electrical measurements are only carried out in step 4).

- 1) We first rinse the microfluidic channels with the PBS solution.
- 2) The conductive MBA-NHS linkers are immobilized on three gold top-gate pads.
- 3) The antibody molecules (anti-CEA, -AFP or -PTH) are immobilized on three pads via the amino-coupling reaction. The excessive NHS-groups are deactivated by ethanolamine.
- 4) After rinsing the microfluidic channels with PBS, a biomarker solution (CEA, AFP or PTH) at a certain concentration (1, 2.5, 5, 10, 25, 50 or 100 nM) is syringed. Under the electrical conditions  $V_{ds} = 100$  mV and  $V_{gs} = 2$  V, a 650-s kinetic process ( $I_d$  vs  $t$ ,  $-50$  s  $\leq t \leq 600$  s) is recorded.

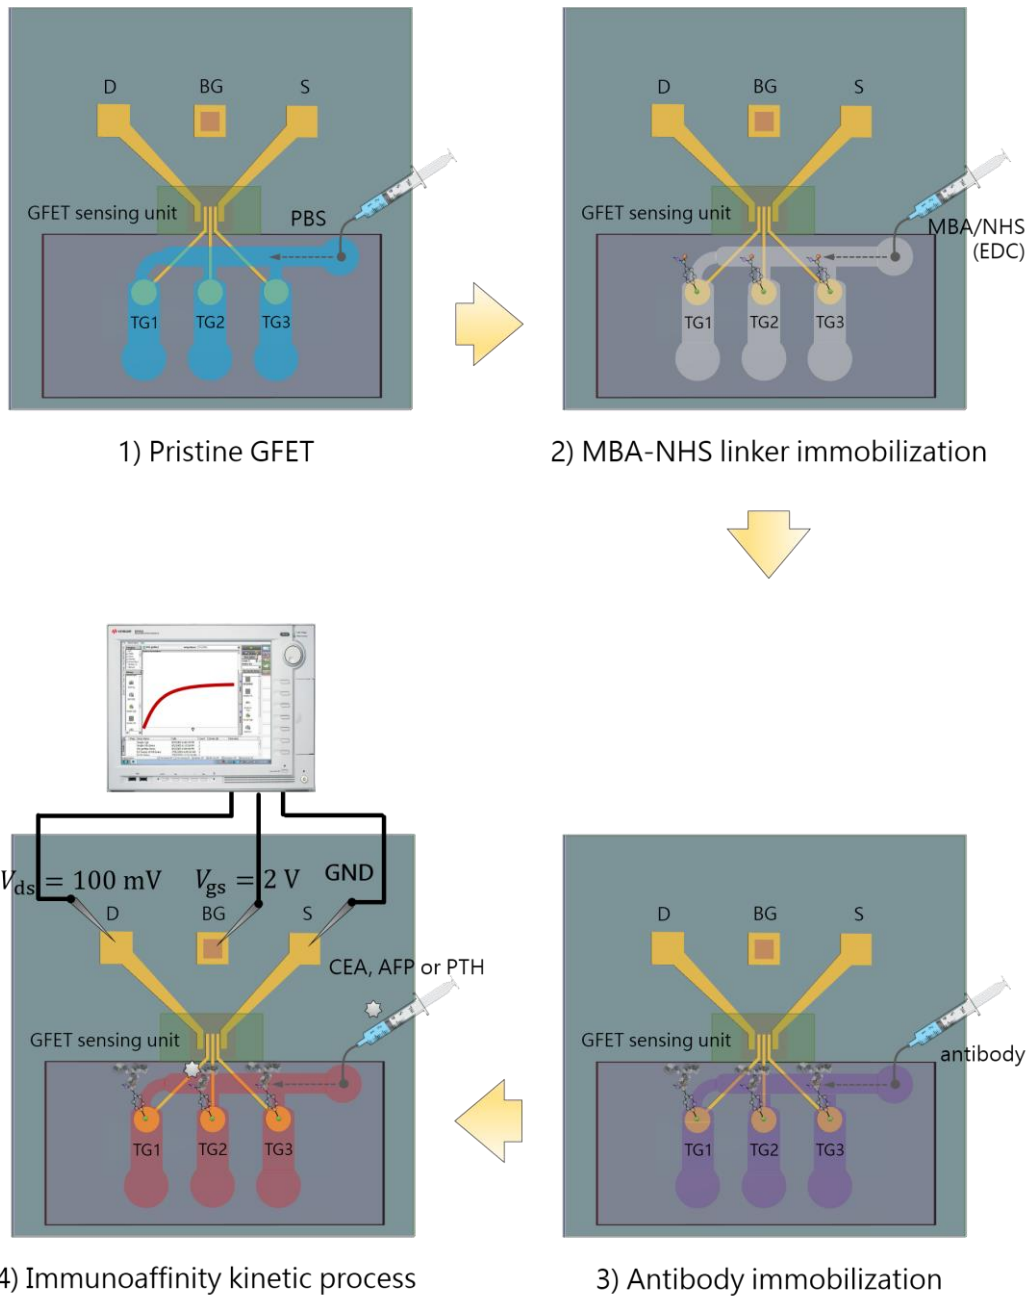

**Figure S4.** To measure an immunoaffinity kinetic process of a single biomarker (CEA, AFP or PTH), the biochemical functionalization steps are same to the steps 1), 2) and 3) in **Figure S2**. Then, in step 4), a biomarker solution at a certain concentration (1 – 100 nM) is introduced, and the corresponding kinetic response curve ( $I_d$  vs  $t$ ) is continuously recorded.



## 5 Dataset of kinetic process measurements (single biomarker)

Following the experimental protocol in **Section 4**, the kinetic processes belonging to CEA, AFP and PTH at various concentrations were measured using 21 GFET devices (#K1 – #K21), respectively. For each biomarker (CEA, AFP or PTH), 7 GFET devices were disposably used to measure the samples (1, 2.5, 5, 10, 25, 50 and 100 nM).

Corresponding to **Figures 2a, 2c and 2e** in the main text, the detailed experimental data and the numerical fitting results are presented in **Table S1 – S3**. Based on the classic exponential function Eq. (1) in the main text<sup>5</sup>, we fitted the kinetic parameters as  $k_a^{(\text{CEA})} \approx 357053.24 \text{ M}^{-1}\text{s}^{-1}$ ,  $k_d^{(\text{CEA})} \approx 0.0003055 \text{ s}^{-1}$ ,  $k_a^{(\text{AFP})} \approx 99465.16 \text{ M}^{-1}\text{s}^{-1}$ ,  $k_d^{(\text{AFP})} \approx 0.0008749 \text{ s}^{-1}$ ,  $k_a^{(\text{PTH})} \approx 1020100.24 \text{ M}^{-1}\text{s}^{-1}$  and  $k_d^{(\text{PTH})} \approx 0.0023879 \text{ s}^{-1}$ .

**Table S1.** Kinetic processes of CEA immunoaffinity and fitting results.

| Device number | CEA concentration, $c^{(CEA)}$ (nM) | Time, $t$ (s) | Experimental results    |                                                              | Fitting results                                                                                                                                               |
|---------------|-------------------------------------|---------------|-------------------------|--------------------------------------------------------------|---------------------------------------------------------------------------------------------------------------------------------------------------------------|
|               |                                     |               | $I_d$ ( $\mu\text{A}$ ) | $\Delta I_d = I_d - \overline{I_d(t < 0)}$ ( $\mu\text{A}$ ) | $\Delta \tilde{I}_d$ ( $\mu\text{A}$ )<br>( $k_a^{(CEA)} \approx 357053.24 \text{ M}^{-1}\text{s}^{-1}$ ,<br>$k_d^{(CEA)} \approx 0.0003055 \text{ s}^{-1}$ ) |
| GFET #K1      | 1                                   | -50           | 2.254                   | 2.261                                                        | -                                                                                                                                                             |
|               |                                     | -40           | 2.259                   |                                                              |                                                                                                                                                               |
|               |                                     | -30           | 2.255                   |                                                              |                                                                                                                                                               |
|               |                                     | -20           | 2.267                   |                                                              |                                                                                                                                                               |
|               |                                     | -10           | 2.271                   |                                                              |                                                                                                                                                               |
|               |                                     | 0             | 2.261                   | 0.000                                                        | 0.000                                                                                                                                                         |
|               |                                     | 10            | 2.281                   | 0.020                                                        | 0.010                                                                                                                                                         |
|               |                                     | 20            | 2.301                   | 0.040                                                        | 0.021                                                                                                                                                         |
|               |                                     | 30            | 2.309                   | 0.048                                                        | 0.031                                                                                                                                                         |
|               |                                     | 40            | 2.335                   | 0.074                                                        | 0.041                                                                                                                                                         |
|               |                                     | 50            | 2.337                   | 0.076                                                        | 0.051                                                                                                                                                         |
|               |                                     | 60            | 2.336                   | 0.075                                                        | 0.062                                                                                                                                                         |
|               |                                     | 70            | 2.364                   | 0.103                                                        | 0.072                                                                                                                                                         |
|               |                                     | 80            | 2.383                   | 0.122                                                        | 0.082                                                                                                                                                         |
|               |                                     | 90            | 2.373                   | 0.112                                                        | 0.091                                                                                                                                                         |
|               |                                     | 100           | 2.405                   | 0.144                                                        | 0.101                                                                                                                                                         |
|               |                                     | 110           | 2.396                   | 0.135                                                        | 0.111                                                                                                                                                         |
|               |                                     | 120           | 2.396                   | 0.135                                                        | 0.121                                                                                                                                                         |
|               |                                     | 130           | 2.414                   | 0.153                                                        | 0.130                                                                                                                                                         |
|               |                                     | 140           | 2.436                   | 0.175                                                        | 0.140                                                                                                                                                         |
|               |                                     | 150           | 2.422                   | 0.161                                                        | 0.150                                                                                                                                                         |
|               |                                     | 160           | 2.431                   | 0.169                                                        | 0.159                                                                                                                                                         |
|               |                                     | 170           | 2.437                   | 0.176                                                        | 0.168                                                                                                                                                         |
|               |                                     | 180           | 2.424                   | 0.162                                                        | 0.178                                                                                                                                                         |
|               |                                     | 190           | 2.439                   | 0.178                                                        | 0.187                                                                                                                                                         |
|               |                                     | 200           | 2.442                   | 0.181                                                        | 0.196                                                                                                                                                         |
|               |                                     | 210           | 2.448                   | 0.186                                                        | 0.205                                                                                                                                                         |
|               |                                     | 220           | 2.454                   | 0.193                                                        | 0.214                                                                                                                                                         |
|               |                                     | 230           | 2.460                   | 0.199                                                        | 0.223                                                                                                                                                         |
|               |                                     | 240           | 2.437                   | 0.176                                                        | 0.232                                                                                                                                                         |
|               |                                     | 250           | 2.459                   | 0.197                                                        | 0.241                                                                                                                                                         |
|               |                                     | 260           | 2.472                   | 0.211                                                        | 0.250                                                                                                                                                         |
|               |                                     | 270           | 2.469                   | 0.208                                                        | 0.259                                                                                                                                                         |
|               |                                     | 280           | 2.502                   | 0.241                                                        | 0.268                                                                                                                                                         |
|               |                                     | 290           | 2.476                   | 0.215                                                        | 0.276                                                                                                                                                         |
| 300           | 2.475                               | 0.213         | 0.285                   |                                                              |                                                                                                                                                               |
| 310           | 2.487                               | 0.226         | 0.293                   |                                                              |                                                                                                                                                               |
| 320           | 2.502                               | 0.241         | 0.302                   |                                                              |                                                                                                                                                               |
| 330           | 2.500                               | 0.238         | 0.310                   |                                                              |                                                                                                                                                               |
| 340           | 2.514                               | 0.252         | 0.319                   |                                                              |                                                                                                                                                               |
| 350           | 2.502                               | 0.241         | 0.327                   |                                                              |                                                                                                                                                               |
| 360           | 2.502                               | 0.241         | 0.335                   |                                                              |                                                                                                                                                               |
| 370           | 2.511                               | 0.250         | 0.344                   |                                                              |                                                                                                                                                               |
| 380           | 2.530                               | 0.269         | 0.352                   |                                                              |                                                                                                                                                               |
| 390           | 2.521                               | 0.259         | 0.360                   |                                                              |                                                                                                                                                               |
| 400           | 2.543                               | 0.282         | 0.368                   |                                                              |                                                                                                                                                               |
| 410           | 2.524                               | 0.263         | 0.376                   |                                                              |                                                                                                                                                               |
| 420           | 2.525                               | 0.264         | 0.384                   |                                                              |                                                                                                                                                               |
| 430           | 2.530                               | 0.268         | 0.392                   |                                                              |                                                                                                                                                               |
| 440           | 2.547                               | 0.285         | 0.400                   |                                                              |                                                                                                                                                               |
| 450           | 2.539                               | 0.278         | 0.407                   |                                                              |                                                                                                                                                               |
| 460           | 2.541                               | 0.280         | 0.415                   |                                                              |                                                                                                                                                               |
| 470           | 2.555                               | 0.293         | 0.423                   |                                                              |                                                                                                                                                               |
| 480           | 2.542                               | 0.281         | 0.431                   |                                                              |                                                                                                                                                               |
| 490           | 2.555                               | 0.294         | 0.438                   |                                                              |                                                                                                                                                               |
| 500           | 2.575                               | 0.314         | 0.446                   |                                                              |                                                                                                                                                               |

|             |       |       |       |        |       |
|-------------|-------|-------|-------|--------|-------|
|             |       | 510   | 2.572 | 0.311  | 0.453 |
|             |       | 520   | 2.560 | 0.299  | 0.461 |
|             |       | 530   | 2.562 | 0.301  | 0.468 |
|             |       | 540   | 2.587 | 0.326  | 0.475 |
|             |       | 550   | 2.581 | 0.319  | 0.483 |
|             |       | 560   | 2.585 | 0.324  | 0.490 |
|             |       | 570   | 2.592 | 0.331  | 0.497 |
|             |       | 580   | 2.603 | 0.341  | 0.504 |
|             |       | 590   | 2.600 | 0.338  | 0.511 |
|             |       | 600   | 2.592 | 0.331  | 0.518 |
| GFET<br>#K2 | 2.5   | -50   | 2.267 | 2.269  | -     |
|             |       | -40   | 2.298 |        |       |
|             |       | -30   | 2.272 |        |       |
|             |       | -20   | 2.251 |        |       |
|             |       | -10   | 2.267 |        |       |
|             |       | 0     | 2.259 | -0.010 | 0.000 |
|             |       | 10    | 2.300 | 0.030  | 0.019 |
|             |       | 20    | 2.349 | 0.080  | 0.037 |
|             |       | 30    | 2.364 | 0.095  | 0.056 |
|             |       | 40    | 2.409 | 0.139  | 0.074 |
|             |       | 50    | 2.428 | 0.159  | 0.092 |
|             |       | 60    | 2.435 | 0.166  | 0.110 |
|             |       | 70    | 2.451 | 0.182  | 0.127 |
|             |       | 80    | 2.471 | 0.202  | 0.144 |
|             |       | 90    | 2.482 | 0.213  | 0.162 |
|             |       | 100   | 2.494 | 0.225  | 0.178 |
|             |       | 110   | 2.503 | 0.234  | 0.195 |
|             |       | 120   | 2.516 | 0.247  | 0.212 |
|             |       | 130   | 2.507 | 0.238  | 0.228 |
|             |       | 140   | 2.544 | 0.275  | 0.244 |
|             |       | 150   | 2.535 | 0.266  | 0.260 |
|             |       | 160   | 2.577 | 0.308  | 0.276 |
|             |       | 170   | 2.563 | 0.294  | 0.291 |
|             |       | 180   | 2.572 | 0.303  | 0.307 |
|             |       | 190   | 2.573 | 0.304  | 0.322 |
|             |       | 200   | 2.600 | 0.331  | 0.337 |
|             |       | 210   | 2.602 | 0.333  | 0.352 |
|             |       | 220   | 2.601 | 0.332  | 0.366 |
|             |       | 230   | 2.637 | 0.368  | 0.381 |
|             |       | 240   | 2.611 | 0.342  | 0.395 |
|             |       | 250   | 2.631 | 0.362  | 0.409 |
|             |       | 260   | 2.658 | 0.388  | 0.423 |
|             |       | 270   | 2.650 | 0.380  | 0.437 |
|             |       | 280   | 2.660 | 0.391  | 0.450 |
|             |       | 290   | 2.683 | 0.414  | 0.464 |
|             |       | 300   | 2.660 | 0.391  | 0.477 |
|             |       | 310   | 2.705 | 0.436  | 0.490 |
|             |       | 320   | 2.706 | 0.437  | 0.503 |
|             |       | 330   | 2.709 | 0.440  | 0.516 |
|             |       | 340   | 2.711 | 0.442  | 0.529 |
|             |       | 350   | 2.718 | 0.449  | 0.541 |
|             |       | 360   | 2.715 | 0.446  | 0.554 |
|             |       | 370   | 2.725 | 0.456  | 0.566 |
|             |       | 380   | 2.737 | 0.468  | 0.578 |
|             |       | 390   | 2.748 | 0.479  | 0.590 |
|             |       | 400   | 2.754 | 0.485  | 0.602 |
| 410         | 2.762 | 0.493 | 0.613 |        |       |
| 420         | 2.773 | 0.504 | 0.625 |        |       |
| 430         | 2.768 | 0.499 | 0.636 |        |       |
| 440         | 2.791 | 0.522 | 0.648 |        |       |
| 450         | 2.803 | 0.534 | 0.659 |        |       |
| 460         | 2.799 | 0.530 | 0.670 |        |       |

|             |       |       |       |       |       |
|-------------|-------|-------|-------|-------|-------|
|             |       | 470   | 2.801 | 0.532 | 0.681 |
|             |       | 480   | 2.816 | 0.547 | 0.691 |
|             |       | 490   | 2.805 | 0.535 | 0.702 |
|             |       | 500   | 2.819 | 0.550 | 0.712 |
|             |       | 510   | 2.833 | 0.564 | 0.723 |
|             |       | 520   | 2.853 | 0.583 | 0.733 |
|             |       | 530   | 2.837 | 0.568 | 0.743 |
|             |       | 540   | 2.855 | 0.586 | 0.753 |
|             |       | 550   | 2.850 | 0.581 | 0.763 |
|             |       | 560   | 2.867 | 0.598 | 0.773 |
|             |       | 570   | 2.867 | 0.598 | 0.782 |
|             |       | 580   | 2.861 | 0.592 | 0.792 |
|             |       | 590   | 2.896 | 0.627 | 0.801 |
|             |       | 600   | 2.873 | 0.604 | 0.810 |
| GFET<br>#K3 | 5     | -50   | 2.262 | 2.277 | -     |
|             |       | -40   | 2.270 |       |       |
|             |       | -30   | 2.292 |       |       |
|             |       | -20   | 2.284 |       |       |
|             |       | -10   | 2.273 |       |       |
|             |       | 0     | 2.279 | 0.002 | 0.000 |
|             |       | 10    | 2.365 | 0.088 | 0.033 |
|             |       | 20    | 2.415 | 0.138 | 0.065 |
|             |       | 30    | 2.449 | 0.173 | 0.096 |
|             |       | 40    | 2.467 | 0.190 | 0.127 |
|             |       | 50    | 2.500 | 0.224 | 0.157 |
|             |       | 60    | 2.525 | 0.248 | 0.186 |
|             |       | 70    | 2.535 | 0.258 | 0.215 |
|             |       | 80    | 2.572 | 0.295 | 0.243 |
|             |       | 90    | 2.591 | 0.315 | 0.271 |
|             |       | 100   | 2.603 | 0.326 | 0.298 |
|             |       | 110   | 2.628 | 0.351 | 0.325 |
|             |       | 120   | 2.649 | 0.372 | 0.351 |
|             |       | 130   | 2.672 | 0.396 | 0.376 |
|             |       | 140   | 2.674 | 0.398 | 0.401 |
|             |       | 150   | 2.708 | 0.431 | 0.425 |
|             |       | 160   | 2.711 | 0.435 | 0.449 |
|             |       | 170   | 2.731 | 0.454 | 0.473 |
|             |       | 180   | 2.734 | 0.457 | 0.496 |
|             |       | 190   | 2.772 | 0.496 | 0.518 |
|             |       | 200   | 2.756 | 0.479 | 0.540 |
|             |       | 210   | 2.778 | 0.501 | 0.562 |
|             |       | 220   | 2.800 | 0.523 | 0.583 |
|             |       | 230   | 2.811 | 0.534 | 0.603 |
|             |       | 240   | 2.839 | 0.562 | 0.624 |
|             |       | 250   | 2.844 | 0.568 | 0.643 |
|             |       | 260   | 2.859 | 0.583 | 0.663 |
|             |       | 270   | 2.881 | 0.604 | 0.682 |
|             |       | 280   | 2.904 | 0.627 | 0.700 |
|             |       | 290   | 2.890 | 0.614 | 0.719 |
|             |       | 300   | 2.920 | 0.643 | 0.736 |
| 310         | 2.931 | 0.654 | 0.754 |       |       |
| 320         | 2.938 | 0.662 | 0.771 |       |       |
| 330         | 2.943 | 0.666 | 0.788 |       |       |
| 340         | 2.970 | 0.694 | 0.804 |       |       |
| 350         | 2.965 | 0.688 | 0.820 |       |       |
| 360         | 2.990 | 0.714 | 0.836 |       |       |
| 370         | 3.003 | 0.726 | 0.851 |       |       |
| 380         | 3.022 | 0.745 | 0.866 |       |       |
| 390         | 3.018 | 0.741 | 0.881 |       |       |
| 400         | 3.028 | 0.751 | 0.896 |       |       |
| 410         | 3.052 | 0.776 | 0.910 |       |       |
| 420         | 3.058 | 0.782 | 0.924 |       |       |

|             |       |       |       |       |       |
|-------------|-------|-------|-------|-------|-------|
|             |       | 430   | 3.066 | 0.790 | 0.937 |
|             |       | 440   | 3.072 | 0.796 | 0.951 |
|             |       | 450   | 3.074 | 0.797 | 0.964 |
|             |       | 460   | 3.103 | 0.827 | 0.976 |
|             |       | 470   | 3.107 | 0.830 | 0.989 |
|             |       | 480   | 3.098 | 0.822 | 1.001 |
|             |       | 490   | 3.129 | 0.853 | 1.013 |
|             |       | 500   | 3.154 | 0.878 | 1.025 |
|             |       | 510   | 3.141 | 0.864 | 1.036 |
|             |       | 520   | 3.146 | 0.870 | 1.048 |
|             |       | 530   | 3.169 | 0.892 | 1.059 |
|             |       | 540   | 3.164 | 0.888 | 1.069 |
|             |       | 550   | 3.182 | 0.906 | 1.080 |
|             |       | 560   | 3.208 | 0.932 | 1.090 |
|             |       | 570   | 3.180 | 0.903 | 1.101 |
|             |       | 580   | 3.188 | 0.911 | 1.110 |
|             |       | 590   | 3.231 | 0.954 | 1.120 |
|             |       | 600   | 3.209 | 0.932 | 1.130 |
| GFET<br>#K4 | 10    | -50   | 2.268 | 2.260 | -     |
|             |       | -40   | 2.242 |       |       |
|             |       | -30   | 2.260 |       |       |
|             |       | -20   | 2.261 |       |       |
|             |       | -10   | 2.262 |       |       |
|             |       | 0     | 2.269 | 0.009 | 0.000 |
|             |       | 10    | 2.412 | 0.151 | 0.060 |
|             |       | 20    | 2.494 | 0.234 | 0.118 |
|             |       | 30    | 2.534 | 0.273 | 0.173 |
|             |       | 40    | 2.585 | 0.325 | 0.227 |
|             |       | 50    | 2.623 | 0.363 | 0.278 |
|             |       | 60    | 2.642 | 0.381 | 0.328 |
|             |       | 70    | 2.688 | 0.427 | 0.376 |
|             |       | 80    | 2.712 | 0.451 | 0.421 |
|             |       | 90    | 2.746 | 0.486 | 0.465 |
|             |       | 100   | 2.777 | 0.517 | 0.508 |
|             |       | 110   | 2.799 | 0.539 | 0.549 |
|             |       | 120   | 2.843 | 0.583 | 0.588 |
|             |       | 130   | 2.871 | 0.611 | 0.626 |
|             |       | 140   | 2.896 | 0.636 | 0.662 |
|             |       | 150   | 2.920 | 0.660 | 0.697 |
|             |       | 160   | 2.930 | 0.670 | 0.730 |
|             |       | 170   | 2.979 | 0.718 | 0.763 |
|             |       | 180   | 3.009 | 0.749 | 0.794 |
|             |       | 190   | 3.033 | 0.773 | 0.824 |
|             |       | 200   | 3.039 | 0.779 | 0.853 |
|             |       | 210   | 3.072 | 0.811 | 0.880 |
|             |       | 220   | 3.070 | 0.810 | 0.907 |
|             |       | 230   | 3.105 | 0.845 | 0.932 |
|             |       | 240   | 3.121 | 0.861 | 0.957 |
|             |       | 250   | 3.149 | 0.889 | 0.981 |
|             |       | 260   | 3.174 | 0.914 | 1.004 |
|             |       | 270   | 3.178 | 0.917 | 1.025 |
|             |       | 280   | 3.191 | 0.931 | 1.047 |
|             |       | 290   | 3.225 | 0.964 | 1.067 |
|             |       | 300   | 3.219 | 0.959 | 1.086 |
|             |       | 310   | 3.247 | 0.986 | 1.105 |
|             |       | 320   | 3.276 | 1.016 | 1.123 |
| 330         | 3.285 | 1.025 | 1.141 |       |       |
| 340         | 3.297 | 1.037 | 1.157 |       |       |
| 350         | 3.295 | 1.035 | 1.173 |       |       |
| 360         | 3.332 | 1.071 | 1.189 |       |       |
| 370         | 3.327 | 1.067 | 1.204 |       |       |
| 380         | 3.351 | 1.090 | 1.218 |       |       |

|             |       |       |       |        |       |
|-------------|-------|-------|-------|--------|-------|
|             |       | 390   | 3.355 | 1.095  | 1.232 |
|             |       | 400   | 3.359 | 1.098  | 1.245 |
|             |       | 410   | 3.392 | 1.131  | 1.258 |
|             |       | 420   | 3.417 | 1.156  | 1.270 |
|             |       | 430   | 3.411 | 1.151  | 1.282 |
|             |       | 440   | 3.418 | 1.158  | 1.293 |
|             |       | 450   | 3.427 | 1.167  | 1.304 |
|             |       | 460   | 3.428 | 1.168  | 1.315 |
|             |       | 470   | 3.457 | 1.196  | 1.325 |
|             |       | 480   | 3.474 | 1.213  | 1.335 |
|             |       | 490   | 3.477 | 1.217  | 1.344 |
|             |       | 500   | 3.493 | 1.233  | 1.353 |
|             |       | 510   | 3.481 | 1.221  | 1.362 |
|             |       | 520   | 3.499 | 1.238  | 1.370 |
|             |       | 530   | 3.514 | 1.254  | 1.378 |
|             |       | 540   | 3.511 | 1.250  | 1.386 |
|             |       | 550   | 3.530 | 1.270  | 1.393 |
|             |       | 560   | 3.529 | 1.269  | 1.400 |
|             |       | 570   | 3.533 | 1.272  | 1.407 |
|             |       | 580   | 3.564 | 1.303  | 1.414 |
|             |       | 590   | 3.557 | 1.297  | 1.420 |
|             |       | 600   | 3.575 | 1.314  | 1.426 |
| GFET<br>#K5 | 25    | -50   | 2.275 | 2.270  | -     |
|             |       | -40   | 2.248 |        |       |
|             |       | -30   | 2.268 |        |       |
|             |       | -20   | 2.285 |        |       |
|             |       | -10   | 2.276 |        |       |
|             |       | 0     | 2.266 | -0.004 | 0.000 |
|             |       | 10    | 2.508 | 0.238  | 0.139 |
|             |       | 20    | 2.614 | 0.344  | 0.266 |
|             |       | 30    | 2.702 | 0.432  | 0.382 |
|             |       | 40    | 2.790 | 0.520  | 0.488 |
|             |       | 50    | 2.842 | 0.572  | 0.584 |
|             |       | 60    | 2.917 | 0.647  | 0.672 |
|             |       | 70    | 2.978 | 0.709  | 0.752 |
|             |       | 80    | 3.063 | 0.794  | 0.825 |
|             |       | 90    | 3.096 | 0.826  | 0.892 |
|             |       | 100   | 3.150 | 0.880  | 0.953 |
|             |       | 110   | 3.193 | 0.923  | 1.008 |
|             |       | 120   | 3.243 | 0.973  | 1.058 |
|             |       | 130   | 3.264 | 0.995  | 1.105 |
|             |       | 140   | 3.309 | 1.039  | 1.147 |
|             |       | 150   | 3.326 | 1.057  | 1.185 |
|             |       | 160   | 3.365 | 1.095  | 1.220 |
|             |       | 170   | 3.389 | 1.119  | 1.251 |
|             |       | 180   | 3.428 | 1.158  | 1.281 |
|             |       | 190   | 3.468 | 1.199  | 1.307 |
|             |       | 200   | 3.479 | 1.209  | 1.331 |
|             |       | 210   | 3.480 | 1.210  | 1.353 |
|             |       | 220   | 3.529 | 1.259  | 1.373 |
|             |       | 230   | 3.570 | 1.300  | 1.391 |
|             |       | 240   | 3.562 | 1.292  | 1.408 |
|             |       | 250   | 3.570 | 1.300  | 1.423 |
|             |       | 260   | 3.580 | 1.310  | 1.437 |
|             |       | 270   | 3.613 | 1.343  | 1.450 |
|             |       | 280   | 3.610 | 1.341  | 1.461 |
| 290         | 3.641 | 1.371 | 1.472 |        |       |
| 300         | 3.664 | 1.394 | 1.481 |        |       |
| 310         | 3.669 | 1.399 | 1.490 |        |       |
| 320         | 3.668 | 1.398 | 1.498 |        |       |
| 330         | 3.687 | 1.417 | 1.505 |        |       |
| 340         | 3.698 | 1.429 | 1.512 |        |       |

|             |       |       |       |       |       |
|-------------|-------|-------|-------|-------|-------|
|             |       | 350   | 3.699 | 1.429 | 1.518 |
|             |       | 360   | 3.715 | 1.445 | 1.524 |
|             |       | 370   | 3.721 | 1.451 | 1.529 |
|             |       | 380   | 3.731 | 1.461 | 1.533 |
|             |       | 390   | 3.747 | 1.478 | 1.537 |
|             |       | 400   | 3.743 | 1.473 | 1.541 |
|             |       | 410   | 3.758 | 1.488 | 1.545 |
|             |       | 420   | 3.755 | 1.486 | 1.548 |
|             |       | 430   | 3.775 | 1.505 | 1.551 |
|             |       | 440   | 3.772 | 1.502 | 1.553 |
|             |       | 450   | 3.781 | 1.512 | 1.556 |
|             |       | 460   | 3.776 | 1.507 | 1.558 |
|             |       | 470   | 3.793 | 1.523 | 1.560 |
|             |       | 480   | 3.783 | 1.513 | 1.562 |
|             |       | 490   | 3.796 | 1.526 | 1.563 |
|             |       | 500   | 3.799 | 1.529 | 1.565 |
|             |       | 510   | 3.803 | 1.533 | 1.566 |
|             |       | 520   | 3.803 | 1.533 | 1.568 |
|             |       | 530   | 3.809 | 1.539 | 1.569 |
|             |       | 540   | 3.821 | 1.551 | 1.570 |
|             |       | 550   | 3.802 | 1.533 | 1.571 |
|             |       | 560   | 3.815 | 1.545 | 1.572 |
|             |       | 570   | 3.822 | 1.552 | 1.572 |
|             |       | 580   | 3.821 | 1.551 | 1.573 |
|             |       | 590   | 3.813 | 1.543 | 1.574 |
|             |       | 600   | 3.834 | 1.564 | 1.574 |
| GFET<br>#K6 | 50    | -50   | 2.268 | 2.266 | -     |
|             |       | -40   | 2.263 |       |       |
|             |       | -30   | 2.265 |       |       |
|             |       | -20   | 2.266 |       |       |
|             |       | -10   | 2.267 |       |       |
|             |       | 0     | 2.265 | 0.000 | 0.000 |
|             |       | 10    | 2.631 | 0.365 | 0.262 |
|             |       | 20    | 2.787 | 0.521 | 0.481 |
|             |       | 30    | 2.937 | 0.672 | 0.664 |
|             |       | 40    | 3.057 | 0.791 | 0.816 |
|             |       | 50    | 3.152 | 0.887 | 0.943 |
|             |       | 60    | 3.226 | 0.961 | 1.049 |
|             |       | 70    | 3.314 | 1.048 | 1.137 |
|             |       | 80    | 3.374 | 1.109 | 1.211 |
|             |       | 90    | 3.445 | 1.179 | 1.272 |
|             |       | 100   | 3.476 | 1.210 | 1.323 |
|             |       | 110   | 3.536 | 1.270 | 1.366 |
|             |       | 120   | 3.560 | 1.295 | 1.402 |
|             |       | 130   | 3.597 | 1.332 | 1.431 |
|             |       | 140   | 3.647 | 1.382 | 1.456 |
|             |       | 150   | 3.646 | 1.380 | 1.477 |
|             |       | 160   | 3.675 | 1.409 | 1.494 |
|             |       | 170   | 3.699 | 1.433 | 1.508 |
|             |       | 180   | 3.731 | 1.465 | 1.520 |
|             |       | 190   | 3.734 | 1.468 | 1.530 |
|             |       | 200   | 3.760 | 1.495 | 1.539 |
|             |       | 210   | 3.774 | 1.509 | 1.546 |
|             |       | 220   | 3.780 | 1.514 | 1.551 |
|             |       | 230   | 3.777 | 1.512 | 1.556 |
|             |       | 240   | 3.800 | 1.534 | 1.560 |
|             |       | 250   | 3.801 | 1.536 | 1.564 |
|             |       | 260   | 3.810 | 1.545 | 1.566 |
| 270         | 3.814 | 1.548 | 1.569 |       |       |
| 280         | 3.818 | 1.552 | 1.571 |       |       |
| 290         | 3.843 | 1.578 | 1.572 |       |       |
|             |       | 300   | 3.806 | 1.540 | 1.574 |

|             |       |       |       |        |       |
|-------------|-------|-------|-------|--------|-------|
|             |       | 310   | 3.839 | 1.573  | 1.575 |
|             |       | 320   | 3.849 | 1.583  | 1.576 |
|             |       | 330   | 3.841 | 1.575  | 1.577 |
|             |       | 340   | 3.851 | 1.585  | 1.577 |
|             |       | 350   | 3.844 | 1.578  | 1.578 |
|             |       | 360   | 3.855 | 1.590  | 1.578 |
|             |       | 370   | 3.853 | 1.588  | 1.579 |
|             |       | 380   | 3.856 | 1.590  | 1.579 |
|             |       | 390   | 3.867 | 1.602  | 1.579 |
|             |       | 400   | 3.865 | 1.600  | 1.579 |
|             |       | 410   | 3.852 | 1.586  | 1.580 |
|             |       | 420   | 3.866 | 1.600  | 1.580 |
|             |       | 430   | 3.871 | 1.605  | 1.580 |
|             |       | 440   | 3.870 | 1.604  | 1.580 |
|             |       | 450   | 3.851 | 1.585  | 1.580 |
|             |       | 460   | 3.865 | 1.599  | 1.580 |
|             |       | 470   | 3.863 | 1.597  | 1.580 |
|             |       | 480   | 3.870 | 1.604  | 1.580 |
|             |       | 490   | 3.841 | 1.575  | 1.580 |
|             |       | 500   | 3.861 | 1.595  | 1.580 |
|             |       | 510   | 3.846 | 1.580  | 1.580 |
|             |       | 520   | 3.865 | 1.599  | 1.580 |
|             |       | 530   | 3.857 | 1.591  | 1.580 |
|             |       | 540   | 3.871 | 1.605  | 1.580 |
|             |       | 550   | 3.860 | 1.595  | 1.580 |
|             |       | 560   | 3.881 | 1.615  | 1.580 |
|             |       | 570   | 3.873 | 1.607  | 1.580 |
|             |       | 580   | 3.880 | 1.614  | 1.580 |
|             |       | 590   | 3.864 | 1.598  | 1.580 |
|             |       | 600   | 3.866 | 1.600  | 1.580 |
| GFET<br>#K7 | 100   | -50   | 2.261 | 2.254  | -     |
|             |       | -40   | 2.270 |        |       |
|             |       | -30   | 2.255 |        |       |
|             |       | -20   | 2.243 |        |       |
|             |       | -10   | 2.248 |        |       |
|             |       | 0     | 2.248 | -0.006 | 0.000 |
|             |       | 10    | 2.781 | 0.527  | 0.478 |
|             |       | 20    | 3.025 | 0.770  | 0.811 |
|             |       | 30    | 3.211 | 0.957  | 1.044 |
|             |       | 40    | 3.346 | 1.092  | 1.206 |
|             |       | 50    | 3.468 | 1.213  | 1.319 |
|             |       | 60    | 3.547 | 1.292  | 1.398 |
|             |       | 70    | 3.599 | 1.345  | 1.453 |
|             |       | 80    | 3.649 | 1.394  | 1.492 |
|             |       | 90    | 3.692 | 1.438  | 1.519 |
|             |       | 100   | 3.735 | 1.481  | 1.537 |
|             |       | 110   | 3.742 | 1.488  | 1.550 |
|             |       | 120   | 3.750 | 1.496  | 1.560 |
|             |       | 130   | 3.784 | 1.530  | 1.566 |
|             |       | 140   | 3.794 | 1.539  | 1.570 |
|             |       | 150   | 3.810 | 1.556  | 1.573 |
|             |       | 160   | 3.809 | 1.555  | 1.576 |
|             |       | 170   | 3.812 | 1.558  | 1.577 |
|             |       | 180   | 3.835 | 1.581  | 1.578 |
|             |       | 190   | 3.818 | 1.564  | 1.579 |
|             |       | 200   | 3.842 | 1.588  | 1.579 |
| 210         | 3.828 | 1.574 | 1.580 |        |       |
| 220         | 3.831 | 1.577 | 1.580 |        |       |
| 230         | 3.842 | 1.588 | 1.580 |        |       |
| 240         | 3.844 | 1.590 | 1.580 |        |       |
| 250         | 3.851 | 1.597 | 1.580 |        |       |
| 260         | 3.850 | 1.596 | 1.580 |        |       |



|  |  |     |       |       |       |
|--|--|-----|-------|-------|-------|
|  |  | 270 | 3.845 | 1.591 | 1.580 |
|  |  | 280 | 3.844 | 1.590 | 1.580 |
|  |  | 290 | 3.851 | 1.596 | 1.580 |
|  |  | 300 | 3.845 | 1.591 | 1.580 |
|  |  | 310 | 3.857 | 1.603 | 1.580 |
|  |  | 320 | 3.853 | 1.599 | 1.580 |
|  |  | 330 | 3.844 | 1.590 | 1.580 |
|  |  | 340 | 3.834 | 1.579 | 1.580 |
|  |  | 350 | 3.827 | 1.573 | 1.580 |
|  |  | 360 | 3.826 | 1.572 | 1.580 |
|  |  | 370 | 3.835 | 1.581 | 1.580 |
|  |  | 380 | 3.827 | 1.573 | 1.581 |
|  |  | 390 | 3.837 | 1.583 | 1.581 |
|  |  | 400 | 3.831 | 1.577 | 1.581 |
|  |  | 410 | 3.851 | 1.597 | 1.581 |
|  |  | 420 | 3.868 | 1.614 | 1.581 |
|  |  | 430 | 3.839 | 1.585 | 1.581 |
|  |  | 440 | 3.852 | 1.598 | 1.581 |
|  |  | 450 | 3.836 | 1.581 | 1.581 |
|  |  | 460 | 3.837 | 1.583 | 1.581 |
|  |  | 470 | 3.827 | 1.573 | 1.581 |
|  |  | 480 | 3.858 | 1.604 | 1.581 |
|  |  | 490 | 3.849 | 1.595 | 1.581 |
|  |  | 500 | 3.840 | 1.586 | 1.581 |
|  |  | 510 | 3.852 | 1.598 | 1.581 |
|  |  | 520 | 3.827 | 1.572 | 1.581 |
|  |  | 530 | 3.851 | 1.597 | 1.581 |
|  |  | 540 | 3.831 | 1.577 | 1.581 |
|  |  | 550 | 3.848 | 1.594 | 1.581 |
|  |  | 560 | 3.840 | 1.586 | 1.581 |
|  |  | 570 | 3.857 | 1.603 | 1.581 |
|  |  | 580 | 3.843 | 1.588 | 1.581 |
|  |  | 590 | 3.844 | 1.590 | 1.581 |
|  |  | 600 | 3.837 | 1.583 | 1.581 |

**Table S2.** Kinetic processes of AFP immunoaffinity and fitting results.

| Device number | AFP concentration, $c^{(AFP)}$ (nM) | Time, $t$ (s) | Experimental results    |                                                              | Fitting results                                                                                                                                              |
|---------------|-------------------------------------|---------------|-------------------------|--------------------------------------------------------------|--------------------------------------------------------------------------------------------------------------------------------------------------------------|
|               |                                     |               | $I_d$ ( $\mu\text{A}$ ) | $\Delta I_d = I_d - \overline{I_d(t < 0)}$ ( $\mu\text{A}$ ) | $\Delta \tilde{I}_d$ ( $\mu\text{A}$ )<br>( $k_a^{(AFP)} \approx 99465.16 \text{ M}^{-1}\text{s}^{-1}$ ,<br>$k_d^{(AFP)} \approx 0.0008749 \text{ s}^{-1}$ ) |
| GFET #K8      | 1                                   | -50           | 2.246                   | 2.247                                                        | -                                                                                                                                                            |
|               |                                     | -40           | 2.242                   |                                                              |                                                                                                                                                              |
|               |                                     | -30           | 2.240                   |                                                              |                                                                                                                                                              |
|               |                                     | -20           | 2.246                   |                                                              |                                                                                                                                                              |
|               |                                     | -10           | 2.238                   |                                                              |                                                                                                                                                              |
|               |                                     | 0             | 2.267                   | 0.021                                                        | 0.000                                                                                                                                                        |
|               |                                     | 10            | 2.249                   | 0.003                                                        | 0.014                                                                                                                                                        |
|               |                                     | 20            | 2.253                   | 0.006                                                        | 0.027                                                                                                                                                        |
|               |                                     | 30            | 2.240                   | -0.007                                                       | 0.041                                                                                                                                                        |
|               |                                     | 40            | 2.284                   | 0.037                                                        | 0.054                                                                                                                                                        |
|               |                                     | 50            | 2.275                   | 0.028                                                        | 0.067                                                                                                                                                        |
|               |                                     | 60            | 2.257                   | 0.010                                                        | 0.080                                                                                                                                                        |
|               |                                     | 70            | 2.262                   | 0.015                                                        | 0.093                                                                                                                                                        |
|               |                                     | 80            | 2.277                   | 0.030                                                        | 0.106                                                                                                                                                        |
|               |                                     | 90            | 2.284                   | 0.038                                                        | 0.118                                                                                                                                                        |
|               |                                     | 100           | 2.281                   | 0.034                                                        | 0.131                                                                                                                                                        |
|               |                                     | 110           | 2.272                   | 0.025                                                        | 0.143                                                                                                                                                        |
|               |                                     | 120           | 2.271                   | 0.025                                                        | 0.156                                                                                                                                                        |
|               |                                     | 130           | 2.276                   | 0.029                                                        | 0.168                                                                                                                                                        |
|               |                                     | 140           | 2.280                   | 0.033                                                        | 0.180                                                                                                                                                        |
|               |                                     | 150           | 2.288                   | 0.041                                                        | 0.192                                                                                                                                                        |
|               |                                     | 160           | 2.283                   | 0.036                                                        | 0.204                                                                                                                                                        |
|               |                                     | 170           | 2.283                   | 0.037                                                        | 0.215                                                                                                                                                        |
|               |                                     | 180           | 2.280                   | 0.034                                                        | 0.227                                                                                                                                                        |
|               |                                     | 190           | 2.303                   | 0.056                                                        | 0.238                                                                                                                                                        |
|               |                                     | 200           | 2.274                   | 0.027                                                        | 0.250                                                                                                                                                        |
|               |                                     | 210           | 2.296                   | 0.049                                                        | 0.261                                                                                                                                                        |
|               |                                     | 220           | 2.303                   | 0.056                                                        | 0.272                                                                                                                                                        |
|               |                                     | 230           | 2.285                   | 0.039                                                        | 0.283                                                                                                                                                        |
|               |                                     | 240           | 2.281                   | 0.034                                                        | 0.294                                                                                                                                                        |
|               |                                     | 250           | 2.291                   | 0.045                                                        | 0.305                                                                                                                                                        |
|               |                                     | 260           | 2.276                   | 0.029                                                        | 0.316                                                                                                                                                        |
|               |                                     | 270           | 2.290                   | 0.043                                                        | 0.326                                                                                                                                                        |
|               |                                     | 280           | 2.297                   | 0.051                                                        | 0.337                                                                                                                                                        |
|               |                                     | 290           | 2.284                   | 0.038                                                        | 0.347                                                                                                                                                        |
|               |                                     | 300           | 2.283                   | 0.036                                                        | 0.358                                                                                                                                                        |
|               |                                     | 310           | 2.291                   | 0.044                                                        | 0.368                                                                                                                                                        |
|               |                                     | 320           | 2.276                   | 0.030                                                        | 0.378                                                                                                                                                        |
|               |                                     | 330           | 2.290                   | 0.044                                                        | 0.388                                                                                                                                                        |
|               |                                     | 340           | 2.307                   | 0.061                                                        | 0.398                                                                                                                                                        |
|               |                                     | 350           | 2.289                   | 0.043                                                        | 0.408                                                                                                                                                        |
|               |                                     | 360           | 2.298                   | 0.052                                                        | 0.417                                                                                                                                                        |
|               |                                     | 370           | 2.308                   | 0.061                                                        | 0.427                                                                                                                                                        |
|               |                                     | 380           | 2.297                   | 0.050                                                        | 0.437                                                                                                                                                        |
|               |                                     | 390           | 2.307                   | 0.061                                                        | 0.446                                                                                                                                                        |
|               |                                     | 400           | 2.304                   | 0.057                                                        | 0.455                                                                                                                                                        |
|               |                                     | 410           | 2.305                   | 0.058                                                        | 0.465                                                                                                                                                        |
|               |                                     | 420           | 2.312                   | 0.065                                                        | 0.474                                                                                                                                                        |
|               |                                     | 430           | 2.298                   | 0.052                                                        | 0.483                                                                                                                                                        |
|               |                                     | 440           | 2.307                   | 0.061                                                        | 0.492                                                                                                                                                        |
| 450           | 2.302                               | 0.055         | 0.501                   |                                                              |                                                                                                                                                              |
| 460           | 2.313                               | 0.066         | 0.510                   |                                                              |                                                                                                                                                              |
| 470           | 2.299                               | 0.053         | 0.518                   |                                                              |                                                                                                                                                              |
| 480           | 2.316                               | 0.069         | 0.527                   |                                                              |                                                                                                                                                              |
| 490           | 2.301                               | 0.054         | 0.536                   |                                                              |                                                                                                                                                              |
| 500           | 2.304                               | 0.057         | 0.544                   |                                                              |                                                                                                                                                              |

|             |       |       |       |        |       |
|-------------|-------|-------|-------|--------|-------|
|             |       | 510   | 2.305 | 0.058  | 0.553 |
|             |       | 520   | 2.301 | 0.055  | 0.561 |
|             |       | 530   | 2.312 | 0.066  | 0.569 |
|             |       | 540   | 2.316 | 0.069  | 0.577 |
|             |       | 550   | 2.323 | 0.077  | 0.585 |
|             |       | 560   | 2.322 | 0.075  | 0.593 |
|             |       | 570   | 2.321 | 0.074  | 0.601 |
|             |       | 580   | 2.306 | 0.059  | 0.609 |
|             |       | 590   | 2.318 | 0.071  | 0.617 |
|             |       | 600   | 2.291 | 0.045  | 0.625 |
| GFET<br>#K9 | 2.5   | -50   | 2.235 | 2.248  | -     |
|             |       | -40   | 2.253 |        |       |
|             |       | -30   | 2.244 |        |       |
|             |       | -20   | 2.257 |        |       |
|             |       | -10   | 2.244 |        |       |
|             |       | 0     | 2.256 | 0.008  | 0.000 |
|             |       | 10    | 2.245 | -0.003 | 0.016 |
|             |       | 20    | 2.261 | 0.013  | 0.031 |
|             |       | 30    | 2.267 | 0.018  | 0.047 |
|             |       | 40    | 2.264 | 0.016  | 0.062 |
|             |       | 50    | 2.278 | 0.030  | 0.077 |
|             |       | 60    | 2.283 | 0.035  | 0.092 |
|             |       | 70    | 2.283 | 0.035  | 0.107 |
|             |       | 80    | 2.281 | 0.033  | 0.121 |
|             |       | 90    | 2.298 | 0.049  | 0.136 |
|             |       | 100   | 2.298 | 0.049  | 0.150 |
|             |       | 110   | 2.281 | 0.033  | 0.164 |
|             |       | 120   | 2.298 | 0.050  | 0.178 |
|             |       | 130   | 2.307 | 0.059  | 0.192 |
|             |       | 140   | 2.295 | 0.047  | 0.205 |
|             |       | 150   | 2.318 | 0.070  | 0.219 |
|             |       | 160   | 2.323 | 0.074  | 0.232 |
|             |       | 170   | 2.325 | 0.076  | 0.245 |
|             |       | 180   | 2.325 | 0.077  | 0.258 |
|             |       | 190   | 2.326 | 0.077  | 0.271 |
|             |       | 200   | 2.317 | 0.069  | 0.284 |
|             |       | 210   | 2.324 | 0.076  | 0.297 |
|             |       | 220   | 2.327 | 0.079  | 0.309 |
|             |       | 230   | 2.340 | 0.092  | 0.321 |
|             |       | 240   | 2.356 | 0.108  | 0.334 |
|             |       | 250   | 2.347 | 0.099  | 0.346 |
|             |       | 260   | 2.333 | 0.085  | 0.357 |
|             |       | 270   | 2.341 | 0.093  | 0.369 |
|             |       | 280   | 2.347 | 0.099  | 0.381 |
|             |       | 290   | 2.346 | 0.098  | 0.392 |
|             |       | 300   | 2.344 | 0.096  | 0.404 |
|             |       | 310   | 2.371 | 0.122  | 0.415 |
|             |       | 320   | 2.357 | 0.109  | 0.426 |
|             |       | 330   | 2.358 | 0.110  | 0.437 |
|             |       | 340   | 2.344 | 0.096  | 0.448 |
|             |       | 350   | 2.354 | 0.106  | 0.459 |
|             |       | 360   | 2.363 | 0.114  | 0.469 |
|             |       | 370   | 2.367 | 0.119  | 0.480 |
|             |       | 380   | 2.368 | 0.120  | 0.490 |
|             |       | 390   | 2.358 | 0.110  | 0.501 |
|             |       | 400   | 2.367 | 0.118  | 0.511 |
| 410         | 2.361 | 0.113 | 0.521 |        |       |
| 420         | 2.371 | 0.122 | 0.531 |        |       |
| 430         | 2.376 | 0.128 | 0.541 |        |       |
| 440         | 2.387 | 0.139 | 0.550 |        |       |
| 450         | 2.377 | 0.129 | 0.560 |        |       |
| 460         | 2.392 | 0.143 | 0.569 |        |       |

|              |       |       |       |        |       |
|--------------|-------|-------|-------|--------|-------|
|              |       | 470   | 2.370 | 0.122  | 0.579 |
|              |       | 480   | 2.383 | 0.135  | 0.588 |
|              |       | 490   | 2.389 | 0.141  | 0.597 |
|              |       | 500   | 2.375 | 0.127  | 0.606 |
|              |       | 510   | 2.396 | 0.148  | 0.615 |
|              |       | 520   | 2.391 | 0.142  | 0.624 |
|              |       | 530   | 2.381 | 0.133  | 0.633 |
|              |       | 540   | 2.406 | 0.158  | 0.642 |
|              |       | 550   | 2.385 | 0.136  | 0.650 |
|              |       | 560   | 2.408 | 0.160  | 0.659 |
|              |       | 570   | 2.399 | 0.151  | 0.667 |
|              |       | 580   | 2.400 | 0.152  | 0.676 |
|              |       | 590   | 2.399 | 0.151  | 0.684 |
|              |       | 600   | 2.411 | 0.163  | 0.692 |
| GFET<br>#K10 | 5     | -50   | 2.235 | 2.247  | -     |
|              |       | -40   | 2.249 |        |       |
|              |       | -30   | 2.251 |        |       |
|              |       | -20   | 2.250 |        |       |
|              |       | -10   | 2.253 |        |       |
|              |       | 0     | 2.245 | -0.002 | 0.000 |
|              |       | 10    | 2.269 | 0.022  | 0.019 |
|              |       | 20    | 2.281 | 0.034  | 0.038 |
|              |       | 30    | 2.286 | 0.039  | 0.057 |
|              |       | 40    | 2.296 | 0.049  | 0.075 |
|              |       | 50    | 2.310 | 0.062  | 0.094 |
|              |       | 60    | 2.335 | 0.088  | 0.112 |
|              |       | 70    | 2.340 | 0.093  | 0.129 |
|              |       | 80    | 2.338 | 0.090  | 0.147 |
|              |       | 90    | 2.352 | 0.105  | 0.164 |
|              |       | 100   | 2.340 | 0.093  | 0.181 |
|              |       | 110   | 2.374 | 0.127  | 0.198 |
|              |       | 120   | 2.370 | 0.123  | 0.214 |
|              |       | 130   | 2.373 | 0.126  | 0.231 |
|              |       | 140   | 2.363 | 0.116  | 0.247 |
|              |       | 150   | 2.394 | 0.146  | 0.262 |
|              |       | 160   | 2.387 | 0.140  | 0.278 |
|              |       | 170   | 2.395 | 0.148  | 0.294 |
|              |       | 180   | 2.393 | 0.146  | 0.309 |
|              |       | 190   | 2.409 | 0.161  | 0.324 |
|              |       | 200   | 2.412 | 0.165  | 0.339 |
|              |       | 210   | 2.420 | 0.173  | 0.353 |
|              |       | 220   | 2.437 | 0.190  | 0.368 |
|              |       | 230   | 2.411 | 0.164  | 0.382 |
|              |       | 240   | 2.436 | 0.189  | 0.396 |
|              |       | 250   | 2.424 | 0.177  | 0.410 |
|              |       | 260   | 2.453 | 0.206  | 0.423 |
|              |       | 270   | 2.439 | 0.191  | 0.437 |
|              |       | 280   | 2.441 | 0.194  | 0.450 |
|              |       | 290   | 2.448 | 0.201  | 0.463 |
|              |       | 300   | 2.462 | 0.215  | 0.476 |
| 310          | 2.447 | 0.200 | 0.489 |        |       |
| 320          | 2.471 | 0.224 | 0.501 |        |       |
| 330          | 2.461 | 0.214 | 0.514 |        |       |
| 340          | 2.483 | 0.236 | 0.526 |        |       |
| 350          | 2.480 | 0.233 | 0.538 |        |       |
| 360          | 2.486 | 0.239 | 0.550 |        |       |
| 370          | 2.486 | 0.239 | 0.562 |        |       |
| 380          | 2.502 | 0.254 | 0.573 |        |       |
| 390          | 2.494 | 0.247 | 0.585 |        |       |
| 400          | 2.486 | 0.239 | 0.596 |        |       |
| 410          | 2.501 | 0.254 | 0.607 |        |       |
| 420          | 2.488 | 0.241 | 0.618 |        |       |

|              |       |       |       |        |       |
|--------------|-------|-------|-------|--------|-------|
|              |       | 430   | 2.496 | 0.249  | 0.629 |
|              |       | 440   | 2.499 | 0.252  | 0.640 |
|              |       | 450   | 2.513 | 0.266  | 0.650 |
|              |       | 460   | 2.527 | 0.280  | 0.660 |
|              |       | 470   | 2.505 | 0.258  | 0.671 |
|              |       | 480   | 2.512 | 0.265  | 0.681 |
|              |       | 490   | 2.529 | 0.282  | 0.691 |
|              |       | 500   | 2.523 | 0.275  | 0.701 |
|              |       | 510   | 2.521 | 0.274  | 0.710 |
|              |       | 520   | 2.542 | 0.294  | 0.720 |
|              |       | 530   | 2.536 | 0.289  | 0.729 |
|              |       | 540   | 2.549 | 0.301  | 0.738 |
|              |       | 550   | 2.538 | 0.291  | 0.748 |
|              |       | 560   | 2.553 | 0.306  | 0.757 |
|              |       | 570   | 2.553 | 0.305  | 0.766 |
|              |       | 580   | 2.562 | 0.315  | 0.774 |
|              |       | 590   | 2.547 | 0.300  | 0.783 |
|              |       | 600   | 2.550 | 0.303  | 0.792 |
| GFET<br>#K11 | 10    | -50   | 2.248 | 2.252  | -     |
|              |       | -40   | 2.254 |        |       |
|              |       | -30   | 2.256 |        |       |
|              |       | -20   | 2.254 |        |       |
|              |       | -10   | 2.251 |        |       |
|              |       | 0     | 2.249 | -0.003 | 0.000 |
|              |       | 10    | 2.284 | 0.032  | 0.026 |
|              |       | 20    | 2.297 | 0.045  | 0.052 |
|              |       | 30    | 2.321 | 0.069  | 0.077 |
|              |       | 40    | 2.344 | 0.091  | 0.102 |
|              |       | 50    | 2.351 | 0.099  | 0.126 |
|              |       | 60    | 2.376 | 0.124  | 0.150 |
|              |       | 70    | 2.402 | 0.150  | 0.173 |
|              |       | 80    | 2.405 | 0.153  | 0.196 |
|              |       | 90    | 2.408 | 0.156  | 0.219 |
|              |       | 100   | 2.432 | 0.180  | 0.241 |
|              |       | 110   | 2.436 | 0.183  | 0.262 |
|              |       | 120   | 2.451 | 0.199  | 0.284 |
|              |       | 130   | 2.454 | 0.202  | 0.304 |
|              |       | 140   | 2.476 | 0.224  | 0.325 |
|              |       | 150   | 2.475 | 0.223  | 0.345 |
|              |       | 160   | 2.500 | 0.248  | 0.365 |
|              |       | 170   | 2.504 | 0.252  | 0.384 |
|              |       | 180   | 2.502 | 0.250  | 0.403 |
|              |       | 190   | 2.512 | 0.260  | 0.422 |
|              |       | 200   | 2.527 | 0.275  | 0.440 |
|              |       | 210   | 2.526 | 0.274  | 0.458 |
|              |       | 220   | 2.555 | 0.303  | 0.476 |
|              |       | 230   | 2.547 | 0.295  | 0.493 |
|              |       | 240   | 2.550 | 0.297  | 0.510 |
|              |       | 250   | 2.547 | 0.295  | 0.527 |
|              |       | 260   | 2.565 | 0.313  | 0.543 |
|              |       | 270   | 2.570 | 0.318  | 0.559 |
|              |       | 280   | 2.575 | 0.323  | 0.575 |
|              |       | 290   | 2.575 | 0.323  | 0.591 |
|              |       | 300   | 2.576 | 0.324  | 0.606 |
|              |       | 310   | 2.602 | 0.350  | 0.621 |
|              |       | 320   | 2.607 | 0.355  | 0.635 |
| 330          | 2.623 | 0.371 | 0.650 |        |       |
| 340          | 2.623 | 0.371 | 0.664 |        |       |
| 350          | 2.637 | 0.385 | 0.678 |        |       |
| 360          | 2.630 | 0.378 | 0.691 |        |       |
| 370          | 2.647 | 0.395 | 0.704 |        |       |
| 380          | 2.640 | 0.388 | 0.718 |        |       |

|              |       |       |       |       |       |
|--------------|-------|-------|-------|-------|-------|
|              |       | 390   | 2.663 | 0.411 | 0.730 |
|              |       | 400   | 2.638 | 0.386 | 0.743 |
|              |       | 410   | 2.660 | 0.408 | 0.755 |
|              |       | 420   | 2.661 | 0.408 | 0.768 |
|              |       | 430   | 2.681 | 0.429 | 0.779 |
|              |       | 440   | 2.681 | 0.429 | 0.791 |
|              |       | 450   | 2.667 | 0.415 | 0.803 |
|              |       | 460   | 2.702 | 0.450 | 0.814 |
|              |       | 470   | 2.699 | 0.447 | 0.825 |
|              |       | 480   | 2.704 | 0.452 | 0.836 |
|              |       | 490   | 2.711 | 0.459 | 0.846 |
|              |       | 500   | 2.728 | 0.475 | 0.857 |
|              |       | 510   | 2.716 | 0.464 | 0.867 |
|              |       | 520   | 2.715 | 0.463 | 0.877 |
|              |       | 530   | 2.736 | 0.484 | 0.887 |
|              |       | 540   | 2.727 | 0.475 | 0.897 |
|              |       | 550   | 2.744 | 0.491 | 0.906 |
|              |       | 560   | 2.757 | 0.505 | 0.916 |
|              |       | 570   | 2.757 | 0.504 | 0.925 |
|              |       | 580   | 2.764 | 0.511 | 0.934 |
|              |       | 590   | 2.772 | 0.519 | 0.943 |
|              |       | 600   | 2.768 | 0.516 | 0.951 |
| GFET<br>#K12 | 25    | -50   | 2.260 | 2.254 | -     |
|              |       | -40   | 2.256 |       |       |
|              |       | -30   | 2.245 |       |       |
|              |       | -20   | 2.259 |       |       |
|              |       | -10   | 2.243 |       |       |
|              |       | 0     | 2.262 | 0.008 | 0.000 |
|              |       | 10    | 2.320 | 0.066 | 0.047 |
|              |       | 20    | 2.370 | 0.115 | 0.092 |
|              |       | 30    | 2.420 | 0.165 | 0.135 |
|              |       | 40    | 2.453 | 0.199 | 0.178 |
|              |       | 50    | 2.483 | 0.228 | 0.218 |
|              |       | 60    | 2.521 | 0.266 | 0.258 |
|              |       | 70    | 2.539 | 0.285 | 0.296 |
|              |       | 80    | 2.567 | 0.313 | 0.333 |
|              |       | 90    | 2.576 | 0.321 | 0.368 |
|              |       | 100   | 2.604 | 0.349 | 0.403 |
|              |       | 110   | 2.626 | 0.372 | 0.436 |
|              |       | 120   | 2.634 | 0.379 | 0.468 |
|              |       | 130   | 2.649 | 0.395 | 0.500 |
|              |       | 140   | 2.667 | 0.413 | 0.530 |
|              |       | 150   | 2.685 | 0.431 | 0.559 |
|              |       | 160   | 2.696 | 0.442 | 0.587 |
|              |       | 170   | 2.723 | 0.468 | 0.614 |
|              |       | 180   | 2.738 | 0.484 | 0.641 |
|              |       | 190   | 2.753 | 0.499 | 0.666 |
|              |       | 200   | 2.757 | 0.502 | 0.691 |
|              |       | 210   | 2.801 | 0.547 | 0.714 |
|              |       | 220   | 2.783 | 0.529 | 0.737 |
|              |       | 230   | 2.793 | 0.539 | 0.760 |
|              |       | 240   | 2.823 | 0.569 | 0.781 |
|              |       | 250   | 2.821 | 0.567 | 0.802 |
|              |       | 260   | 2.838 | 0.584 | 0.822 |
|              |       | 270   | 2.866 | 0.612 | 0.842 |
|              |       | 280   | 2.868 | 0.614 | 0.860 |
| 290          | 2.870 | 0.616 | 0.879 |       |       |
| 300          | 2.893 | 0.638 | 0.896 |       |       |
| 310          | 2.891 | 0.636 | 0.913 |       |       |
| 320          | 2.898 | 0.644 | 0.930 |       |       |
| 330          | 2.922 | 0.668 | 0.946 |       |       |
| 340          | 2.930 | 0.676 | 0.961 |       |       |

|              |       |       |       |       |       |
|--------------|-------|-------|-------|-------|-------|
|              |       | 350   | 2.935 | 0.680 | 0.976 |
|              |       | 360   | 2.940 | 0.686 | 0.990 |
|              |       | 370   | 2.953 | 0.698 | 1.004 |
|              |       | 380   | 2.976 | 0.722 | 1.018 |
|              |       | 390   | 2.967 | 0.713 | 1.031 |
|              |       | 400   | 3.003 | 0.749 | 1.043 |
|              |       | 410   | 2.999 | 0.744 | 1.055 |
|              |       | 420   | 3.006 | 0.751 | 1.067 |
|              |       | 430   | 3.018 | 0.764 | 1.078 |
|              |       | 440   | 3.043 | 0.789 | 1.089 |
|              |       | 450   | 3.033 | 0.778 | 1.100 |
|              |       | 460   | 3.047 | 0.793 | 1.110 |
|              |       | 470   | 3.045 | 0.790 | 1.120 |
|              |       | 480   | 3.057 | 0.802 | 1.130 |
|              |       | 490   | 3.059 | 0.805 | 1.139 |
|              |       | 500   | 3.072 | 0.818 | 1.148 |
|              |       | 510   | 3.094 | 0.840 | 1.157 |
|              |       | 520   | 3.092 | 0.838 | 1.165 |
|              |       | 530   | 3.099 | 0.844 | 1.173 |
|              |       | 540   | 3.101 | 0.847 | 1.181 |
|              |       | 550   | 3.101 | 0.846 | 1.189 |
|              |       | 560   | 3.111 | 0.857 | 1.196 |
|              |       | 570   | 3.117 | 0.863 | 1.203 |
|              |       | 580   | 3.127 | 0.873 | 1.210 |
|              |       | 590   | 3.140 | 0.886 | 1.217 |
|              |       | 600   | 3.139 | 0.885 | 1.223 |
| GFET<br>#K13 | 50    | -50   | 2.256 | 2.263 | -     |
|              |       | -40   | 2.258 |       |       |
|              |       | -30   | 2.264 |       |       |
|              |       | -20   | 2.263 |       |       |
|              |       | -10   | 2.273 |       |       |
|              |       | 0     | 2.266 | 0.003 | 0.000 |
|              |       | 10    | 2.396 | 0.132 | 0.080 |
|              |       | 20    | 2.492 | 0.229 | 0.156 |
|              |       | 30    | 2.559 | 0.296 | 0.227 |
|              |       | 40    | 2.603 | 0.340 | 0.294 |
|              |       | 50    | 2.661 | 0.397 | 0.358 |
|              |       | 60    | 2.696 | 0.433 | 0.418 |
|              |       | 70    | 2.734 | 0.470 | 0.474 |
|              |       | 80    | 2.767 | 0.503 | 0.527 |
|              |       | 90    | 2.786 | 0.523 | 0.577 |
|              |       | 100   | 2.826 | 0.563 | 0.625 |
|              |       | 110   | 2.856 | 0.592 | 0.669 |
|              |       | 120   | 2.867 | 0.604 | 0.712 |
|              |       | 130   | 2.901 | 0.638 | 0.751 |
|              |       | 140   | 2.934 | 0.671 | 0.789 |
|              |       | 150   | 2.962 | 0.699 | 0.824 |
|              |       | 160   | 2.982 | 0.718 | 0.857 |
|              |       | 170   | 2.997 | 0.733 | 0.889 |
|              |       | 180   | 3.019 | 0.756 | 0.919 |
|              |       | 190   | 3.042 | 0.779 | 0.946 |
|              |       | 200   | 3.064 | 0.800 | 0.973 |
|              |       | 210   | 3.078 | 0.815 | 0.998 |
|              |       | 220   | 3.093 | 0.830 | 1.021 |
|              |       | 230   | 3.109 | 0.846 | 1.043 |
|              |       | 240   | 3.128 | 0.865 | 1.064 |
|              |       | 250   | 3.145 | 0.882 | 1.084 |
|              |       | 260   | 3.173 | 0.910 | 1.102 |
|              |       | 270   | 3.183 | 0.920 | 1.120 |
| 280          | 3.198 | 0.934 | 1.137 |       |       |
| 290          | 3.215 | 0.951 | 1.152 |       |       |
| 300          | 3.217 | 0.954 | 1.167 |       |       |

|              |       |       |       |        |       |
|--------------|-------|-------|-------|--------|-------|
|              |       | 310   | 3.241 | 0.978  | 1.181 |
|              |       | 320   | 3.257 | 0.994  | 1.194 |
|              |       | 330   | 3.259 | 0.996  | 1.206 |
|              |       | 340   | 3.269 | 1.006  | 1.218 |
|              |       | 350   | 3.278 | 1.015  | 1.229 |
|              |       | 360   | 3.290 | 1.027  | 1.239 |
|              |       | 370   | 3.286 | 1.022  | 1.249 |
|              |       | 380   | 3.319 | 1.055  | 1.258 |
|              |       | 390   | 3.320 | 1.057  | 1.267 |
|              |       | 400   | 3.345 | 1.081  | 1.275 |
|              |       | 410   | 3.353 | 1.090  | 1.283 |
|              |       | 420   | 3.359 | 1.096  | 1.290 |
|              |       | 430   | 3.358 | 1.094  | 1.297 |
|              |       | 440   | 3.393 | 1.129  | 1.303 |
|              |       | 450   | 3.389 | 1.125  | 1.309 |
|              |       | 460   | 3.396 | 1.132  | 1.315 |
|              |       | 470   | 3.405 | 1.141  | 1.321 |
|              |       | 480   | 3.405 | 1.141  | 1.326 |
|              |       | 490   | 3.412 | 1.149  | 1.331 |
|              |       | 500   | 3.425 | 1.162  | 1.335 |
|              |       | 510   | 3.422 | 1.159  | 1.339 |
|              |       | 520   | 3.424 | 1.161  | 1.343 |
|              |       | 530   | 3.454 | 1.191  | 1.347 |
|              |       | 540   | 3.431 | 1.168  | 1.351 |
|              |       | 550   | 3.450 | 1.186  | 1.354 |
|              |       | 560   | 3.444 | 1.180  | 1.358 |
|              |       | 570   | 3.461 | 1.198  | 1.361 |
|              |       | 580   | 3.460 | 1.197  | 1.363 |
|              |       | 590   | 3.464 | 1.201  | 1.366 |
|              |       | 600   | 3.473 | 1.210  | 1.369 |
| GFET<br>#K14 | 100   | -50   | 2.262 | 2.262  | -     |
|              |       | -40   | 2.275 |        |       |
|              |       | -30   | 2.260 |        |       |
|              |       | -20   | 2.265 |        |       |
|              |       | -10   | 2.260 |        |       |
|              |       | 0     | 2.251 | -0.011 | 0.000 |
|              |       | 10    | 2.506 | 0.244  | 0.145 |
|              |       | 20    | 2.626 | 0.364  | 0.275 |
|              |       | 30    | 2.709 | 0.447  | 0.391 |
|              |       | 40    | 2.785 | 0.523  | 0.496 |
|              |       | 50    | 2.863 | 0.601  | 0.590 |
|              |       | 60    | 2.899 | 0.637  | 0.674 |
|              |       | 70    | 2.956 | 0.694  | 0.749 |
|              |       | 80    | 2.999 | 0.737  | 0.817 |
|              |       | 90    | 3.041 | 0.779  | 0.878 |
|              |       | 100   | 3.073 | 0.811  | 0.933 |
|              |       | 110   | 3.112 | 0.850  | 0.982 |
|              |       | 120   | 3.151 | 0.889  | 1.026 |
|              |       | 130   | 3.170 | 0.908  | 1.065 |
|              |       | 140   | 3.209 | 0.947  | 1.101 |
|              |       | 150   | 3.243 | 0.980  | 1.133 |
|              |       | 160   | 3.266 | 1.004  | 1.161 |
|              |       | 170   | 3.287 | 1.025  | 1.187 |
|              |       | 180   | 3.309 | 1.047  | 1.210 |
|              |       | 190   | 3.335 | 1.073  | 1.230 |
|              |       | 200   | 3.338 | 1.075  | 1.249 |
|              |       | 210   | 3.382 | 1.120  | 1.266 |
| 220          | 3.373 | 1.111 | 1.280 |        |       |
| 230          | 3.403 | 1.141 | 1.294 |        |       |
| 240          | 3.408 | 1.146 | 1.306 |        |       |
| 250          | 3.421 | 1.159 | 1.317 |        |       |
| 260          | 3.434 | 1.172 | 1.326 |        |       |



|  |  |     |       |       |       |
|--|--|-----|-------|-------|-------|
|  |  | 270 | 3.441 | 1.179 | 1.335 |
|  |  | 280 | 3.461 | 1.199 | 1.343 |
|  |  | 290 | 3.486 | 1.224 | 1.350 |
|  |  | 300 | 3.492 | 1.230 | 1.356 |
|  |  | 310 | 3.488 | 1.226 | 1.362 |
|  |  | 320 | 3.512 | 1.249 | 1.367 |
|  |  | 330 | 3.514 | 1.252 | 1.371 |
|  |  | 340 | 3.520 | 1.258 | 1.375 |
|  |  | 350 | 3.550 | 1.287 | 1.379 |
|  |  | 360 | 3.532 | 1.270 | 1.382 |
|  |  | 370 | 3.542 | 1.280 | 1.385 |
|  |  | 380 | 3.561 | 1.299 | 1.388 |
|  |  | 390 | 3.562 | 1.299 | 1.390 |
|  |  | 400 | 3.541 | 1.279 | 1.392 |
|  |  | 410 | 3.547 | 1.284 | 1.394 |
|  |  | 420 | 3.577 | 1.315 | 1.396 |
|  |  | 430 | 3.576 | 1.313 | 1.397 |
|  |  | 440 | 3.564 | 1.302 | 1.399 |
|  |  | 450 | 3.570 | 1.308 | 1.400 |
|  |  | 460 | 3.578 | 1.315 | 1.401 |
|  |  | 470 | 3.589 | 1.327 | 1.402 |
|  |  | 480 | 3.592 | 1.329 | 1.403 |
|  |  | 490 | 3.584 | 1.322 | 1.404 |
|  |  | 500 | 3.588 | 1.326 | 1.405 |
|  |  | 510 | 3.588 | 1.326 | 1.405 |
|  |  | 520 | 3.600 | 1.337 | 1.406 |
|  |  | 530 | 3.611 | 1.349 | 1.406 |
|  |  | 540 | 3.602 | 1.340 | 1.407 |
|  |  | 550 | 3.623 | 1.360 | 1.407 |
|  |  | 560 | 3.598 | 1.336 | 1.408 |
|  |  | 570 | 3.620 | 1.358 | 1.408 |
|  |  | 580 | 3.604 | 1.342 | 1.408 |
|  |  | 590 | 3.620 | 1.358 | 1.409 |
|  |  | 600 | 3.617 | 1.355 | 1.409 |

**Table S3.** Kinetic processes of PTH immunoaffinity and fitting results.

| Device number | PTH concentration, $c^{(PTH)}$ (nM) | Time, $t$ (s) | Experimental results    |                                                              | Fitting results                                                                                                                                                |
|---------------|-------------------------------------|---------------|-------------------------|--------------------------------------------------------------|----------------------------------------------------------------------------------------------------------------------------------------------------------------|
|               |                                     |               | $I_d$ ( $\mu\text{A}$ ) | $\Delta I_d = I_d - \overline{I_d}(t < 0)$ ( $\mu\text{A}$ ) | $\Delta \tilde{I}_d$ ( $\mu\text{A}$ )<br>( $k_a^{(PTH)} \approx 1020100.24 \text{ M}^{-1}\text{s}^{-1}$ ,<br>$k_d^{(PTH)} \approx 0.0023879 \text{ s}^{-1}$ ) |
| GFET #K15     | 1                                   | -50           | 2.295                   | 2.280                                                        | -                                                                                                                                                              |
|               |                                     | -40           | 2.281                   |                                                              |                                                                                                                                                                |
|               |                                     | -30           | 2.271                   |                                                              |                                                                                                                                                                |
|               |                                     | -20           | 2.273                   |                                                              |                                                                                                                                                                |
|               |                                     | -10           | 2.279                   |                                                              |                                                                                                                                                                |
|               |                                     | 0             | 2.280                   | 0.000                                                        | 0.000                                                                                                                                                          |
|               |                                     | 10            | 2.280                   | 0.001                                                        | 0.010                                                                                                                                                          |
|               |                                     | 20            | 2.285                   | 0.005                                                        | 0.019                                                                                                                                                          |
|               |                                     | 30            | 2.301                   | 0.021                                                        | 0.028                                                                                                                                                          |
|               |                                     | 40            | 2.299                   | 0.020                                                        | 0.037                                                                                                                                                          |
|               |                                     | 50            | 2.304                   | 0.024                                                        | 0.045                                                                                                                                                          |
|               |                                     | 60            | 2.289                   | 0.009                                                        | 0.053                                                                                                                                                          |
|               |                                     | 70            | 2.299                   | 0.019                                                        | 0.061                                                                                                                                                          |
|               |                                     | 80            | 2.307                   | 0.027                                                        | 0.069                                                                                                                                                          |
|               |                                     | 90            | 2.300                   | 0.020                                                        | 0.076                                                                                                                                                          |
|               |                                     | 100           | 2.311                   | 0.031                                                        | 0.084                                                                                                                                                          |
|               |                                     | 110           | 2.314                   | 0.034                                                        | 0.090                                                                                                                                                          |
|               |                                     | 120           | 2.312                   | 0.032                                                        | 0.097                                                                                                                                                          |
|               |                                     | 130           | 2.309                   | 0.029                                                        | 0.103                                                                                                                                                          |
|               |                                     | 140           | 2.324                   | 0.044                                                        | 0.110                                                                                                                                                          |
|               |                                     | 150           | 2.306                   | 0.026                                                        | 0.116                                                                                                                                                          |
|               |                                     | 160           | 2.314                   | 0.034                                                        | 0.122                                                                                                                                                          |
|               |                                     | 170           | 2.324                   | 0.044                                                        | 0.127                                                                                                                                                          |
|               |                                     | 180           | 2.328                   | 0.048                                                        | 0.133                                                                                                                                                          |
|               |                                     | 190           | 2.328                   | 0.049                                                        | 0.138                                                                                                                                                          |
|               |                                     | 200           | 2.331                   | 0.052                                                        | 0.143                                                                                                                                                          |
|               |                                     | 210           | 2.332                   | 0.052                                                        | 0.148                                                                                                                                                          |
|               |                                     | 220           | 2.334                   | 0.054                                                        | 0.153                                                                                                                                                          |
|               |                                     | 230           | 2.331                   | 0.051                                                        | 0.157                                                                                                                                                          |
|               |                                     | 240           | 2.331                   | 0.051                                                        | 0.162                                                                                                                                                          |
|               |                                     | 250           | 2.330                   | 0.051                                                        | 0.166                                                                                                                                                          |
|               |                                     | 260           | 2.336                   | 0.056                                                        | 0.170                                                                                                                                                          |
|               |                                     | 270           | 2.334                   | 0.054                                                        | 0.174                                                                                                                                                          |
|               |                                     | 280           | 2.347                   | 0.067                                                        | 0.178                                                                                                                                                          |
|               |                                     | 290           | 2.344                   | 0.064                                                        | 0.182                                                                                                                                                          |
| 300           | 2.340                               | 0.060         | 0.185                   |                                                              |                                                                                                                                                                |
| 310           | 2.340                               | 0.061         | 0.189                   |                                                              |                                                                                                                                                                |
| 320           | 2.347                               | 0.067         | 0.192                   |                                                              |                                                                                                                                                                |
| 330           | 2.348                               | 0.068         | 0.195                   |                                                              |                                                                                                                                                                |
| 340           | 2.348                               | 0.068         | 0.198                   |                                                              |                                                                                                                                                                |
| 350           | 2.347                               | 0.068         | 0.201                   |                                                              |                                                                                                                                                                |
| 360           | 2.351                               | 0.071         | 0.204                   |                                                              |                                                                                                                                                                |
| 370           | 2.349                               | 0.069         | 0.207                   |                                                              |                                                                                                                                                                |
| 380           | 2.354                               | 0.074         | 0.210                   |                                                              |                                                                                                                                                                |
| 390           | 2.351                               | 0.071         | 0.213                   |                                                              |                                                                                                                                                                |
| 400           | 2.348                               | 0.068         | 0.215                   |                                                              |                                                                                                                                                                |
| 410           | 2.360                               | 0.081         | 0.218                   |                                                              |                                                                                                                                                                |
| 420           | 2.354                               | 0.074         | 0.220                   |                                                              |                                                                                                                                                                |
| 430           | 2.358                               | 0.078         | 0.222                   |                                                              |                                                                                                                                                                |
| 440           | 2.349                               | 0.069         | 0.225                   |                                                              |                                                                                                                                                                |
| 450           | 2.354                               | 0.074         | 0.227                   |                                                              |                                                                                                                                                                |
| 460           | 2.356                               | 0.076         | 0.229                   |                                                              |                                                                                                                                                                |
| 470           | 2.357                               | 0.077         | 0.231                   |                                                              |                                                                                                                                                                |
| 480           | 2.352                               | 0.072         | 0.233                   |                                                              |                                                                                                                                                                |
| 490           | 2.362                               | 0.082         | 0.235                   |                                                              |                                                                                                                                                                |
| 500           | 2.360                               | 0.080         | 0.237                   |                                                              |                                                                                                                                                                |
| 510           | 2.352                               | 0.072         | 0.238                   |                                                              |                                                                                                                                                                |

|              |       |       |       |        |       |
|--------------|-------|-------|-------|--------|-------|
|              |       | 520   | 2.362 | 0.082  | 0.240 |
|              |       | 530   | 2.361 | 0.081  | 0.242 |
|              |       | 540   | 2.357 | 0.077  | 0.243 |
|              |       | 550   | 2.362 | 0.082  | 0.245 |
|              |       | 560   | 2.367 | 0.088  | 0.246 |
|              |       | 570   | 2.361 | 0.081  | 0.248 |
|              |       | 580   | 2.364 | 0.084  | 0.249 |
|              |       | 590   | 2.369 | 0.090  | 0.250 |
|              |       | 600   | 2.360 | 0.080  | 0.252 |
| GFET<br>#K16 | 2.5   | -50   | 2.272 | 2.271  | -     |
|              |       | -40   | 2.276 |        |       |
|              |       | -30   | 2.270 |        |       |
|              |       | -20   | 2.253 |        |       |
|              |       | -10   | 2.286 |        |       |
|              |       | 0     | 2.270 | -0.001 | 0.000 |
|              |       | 10    | 2.279 | 0.008  | 0.014 |
|              |       | 20    | 2.299 | 0.028  | 0.027 |
|              |       | 30    | 2.301 | 0.030  | 0.040 |
|              |       | 40    | 2.299 | 0.027  | 0.052 |
|              |       | 50    | 2.315 | 0.044  | 0.063 |
|              |       | 60    | 2.308 | 0.037  | 0.074 |
|              |       | 70    | 2.320 | 0.049  | 0.085 |
|              |       | 80    | 2.330 | 0.059  | 0.094 |
|              |       | 90    | 2.327 | 0.056  | 0.104 |
|              |       | 100   | 2.329 | 0.058  | 0.113 |
|              |       | 110   | 2.334 | 0.063  | 0.121 |
|              |       | 120   | 2.340 | 0.069  | 0.129 |
|              |       | 130   | 2.338 | 0.067  | 0.137 |
|              |       | 140   | 2.358 | 0.087  | 0.144 |
|              |       | 150   | 2.348 | 0.077  | 0.151 |
|              |       | 160   | 2.357 | 0.086  | 0.158 |
|              |       | 170   | 2.356 | 0.085  | 0.164 |
|              |       | 180   | 2.363 | 0.092  | 0.170 |
|              |       | 190   | 2.367 | 0.095  | 0.176 |
|              |       | 200   | 2.359 | 0.088  | 0.181 |
|              |       | 210   | 2.361 | 0.090  | 0.187 |
|              |       | 220   | 2.365 | 0.094  | 0.192 |
|              |       | 230   | 2.387 | 0.116  | 0.196 |
|              |       | 240   | 2.386 | 0.115  | 0.201 |
|              |       | 250   | 2.387 | 0.116  | 0.205 |
|              |       | 260   | 2.385 | 0.113  | 0.209 |
|              |       | 270   | 2.392 | 0.121  | 0.213 |
|              |       | 280   | 2.393 | 0.122  | 0.217 |
|              |       | 290   | 2.391 | 0.120  | 0.220 |
|              |       | 300   | 2.387 | 0.116  | 0.223 |
|              |       | 310   | 2.391 | 0.120  | 0.227 |
|              |       | 320   | 2.394 | 0.123  | 0.230 |
|              |       | 330   | 2.399 | 0.128  | 0.232 |
|              |       | 340   | 2.399 | 0.128  | 0.235 |
|              |       | 350   | 2.394 | 0.123  | 0.238 |
|              |       | 360   | 2.397 | 0.126  | 0.240 |
|              |       | 370   | 2.396 | 0.125  | 0.243 |
|              |       | 380   | 2.402 | 0.131  | 0.245 |
|              |       | 390   | 2.405 | 0.134  | 0.247 |
|              |       | 400   | 2.404 | 0.133  | 0.249 |
|              |       | 410   | 2.407 | 0.136  | 0.251 |
| 420          | 2.415 | 0.144 | 0.253 |        |       |
| 430          | 2.394 | 0.123 | 0.255 |        |       |
| 440          | 2.410 | 0.139 | 0.256 |        |       |
| 450          | 2.413 | 0.142 | 0.258 |        |       |
| 460          | 2.408 | 0.136 | 0.259 |        |       |
| 470          | 2.402 | 0.131 | 0.261 |        |       |

|              |       |       |       |       |       |
|--------------|-------|-------|-------|-------|-------|
|              |       | 480   | 2.403 | 0.132 | 0.262 |
|              |       | 490   | 2.414 | 0.143 | 0.263 |
|              |       | 500   | 2.416 | 0.145 | 0.265 |
|              |       | 510   | 2.409 | 0.137 | 0.266 |
|              |       | 520   | 2.420 | 0.149 | 0.267 |
|              |       | 530   | 2.419 | 0.148 | 0.268 |
|              |       | 540   | 2.431 | 0.160 | 0.269 |
|              |       | 550   | 2.417 | 0.146 | 0.270 |
|              |       | 560   | 2.409 | 0.138 | 0.271 |
|              |       | 570   | 2.400 | 0.129 | 0.272 |
|              |       | 580   | 2.410 | 0.138 | 0.273 |
|              |       | 590   | 2.425 | 0.154 | 0.273 |
|              |       | 600   | 2.407 | 0.136 | 0.274 |
| GFET<br>#K17 | 5     | -50   | 2.280 | 2.28  | -     |
|              |       | -40   | 2.283 |       |       |
|              |       | -30   | 2.285 |       |       |
|              |       | -20   | 2.293 |       |       |
|              |       | -10   | 2.277 |       |       |
|              |       | 0     | 2.288 | 0.004 | 0.000 |
|              |       | 10    | 2.304 | 0.020 | 0.021 |
|              |       | 20    | 2.319 | 0.035 | 0.040 |
|              |       | 30    | 2.330 | 0.045 | 0.058 |
|              |       | 40    | 2.343 | 0.059 | 0.075 |
|              |       | 50    | 2.354 | 0.070 | 0.090 |
|              |       | 60    | 2.357 | 0.073 | 0.105 |
|              |       | 70    | 2.370 | 0.085 | 0.118 |
|              |       | 80    | 2.380 | 0.096 | 0.130 |
|              |       | 90    | 2.382 | 0.097 | 0.142 |
|              |       | 100   | 2.393 | 0.109 | 0.152 |
|              |       | 110   | 2.396 | 0.111 | 0.162 |
|              |       | 120   | 2.398 | 0.113 | 0.171 |
|              |       | 130   | 2.405 | 0.121 | 0.180 |
|              |       | 140   | 2.411 | 0.126 | 0.188 |
|              |       | 150   | 2.415 | 0.130 | 0.195 |
|              |       | 160   | 2.428 | 0.144 | 0.202 |
|              |       | 170   | 2.419 | 0.135 | 0.208 |
|              |       | 180   | 2.426 | 0.142 | 0.214 |
|              |       | 190   | 2.434 | 0.150 | 0.219 |
|              |       | 200   | 2.435 | 0.151 | 0.224 |
|              |       | 210   | 2.446 | 0.162 | 0.229 |
|              |       | 220   | 2.433 | 0.149 | 0.233 |
|              |       | 230   | 2.441 | 0.157 | 0.237 |
|              |       | 240   | 2.442 | 0.157 | 0.241 |
|              |       | 250   | 2.449 | 0.165 | 0.245 |
|              |       | 260   | 2.447 | 0.163 | 0.248 |
|              |       | 270   | 2.455 | 0.171 | 0.251 |
|              |       | 280   | 2.444 | 0.160 | 0.254 |
|              |       | 290   | 2.456 | 0.171 | 0.256 |
|              |       | 300   | 2.477 | 0.193 | 0.259 |
| 310          | 2.459 | 0.175 | 0.261 |       |       |
| 320          | 2.466 | 0.181 | 0.263 |       |       |
| 330          | 2.463 | 0.178 | 0.265 |       |       |
| 340          | 2.466 | 0.181 | 0.266 |       |       |
| 350          | 2.464 | 0.180 | 0.268 |       |       |
| 360          | 2.467 | 0.182 | 0.270 |       |       |
| 370          | 2.463 | 0.179 | 0.271 |       |       |
| 380          | 2.474 | 0.190 | 0.272 |       |       |
| 390          | 2.482 | 0.198 | 0.274 |       |       |
| 400          | 2.469 | 0.185 | 0.275 |       |       |
| 410          | 2.472 | 0.188 | 0.276 |       |       |
| 420          | 2.463 | 0.179 | 0.277 |       |       |
| 430          | 2.464 | 0.180 | 0.278 |       |       |

|              |       |       |       |       |       |
|--------------|-------|-------|-------|-------|-------|
|              |       | 440   | 2.462 | 0.177 | 0.278 |
|              |       | 450   | 2.476 | 0.191 | 0.279 |
|              |       | 460   | 2.473 | 0.189 | 0.280 |
|              |       | 470   | 2.478 | 0.194 | 0.281 |
|              |       | 480   | 2.465 | 0.180 | 0.281 |
|              |       | 490   | 2.478 | 0.194 | 0.282 |
|              |       | 500   | 2.478 | 0.194 | 0.282 |
|              |       | 510   | 2.470 | 0.186 | 0.283 |
|              |       | 520   | 2.483 | 0.199 | 0.283 |
|              |       | 530   | 2.479 | 0.195 | 0.284 |
|              |       | 540   | 2.478 | 0.194 | 0.284 |
|              |       | 550   | 2.478 | 0.193 | 0.284 |
|              |       | 560   | 2.473 | 0.188 | 0.285 |
|              |       | 570   | 2.476 | 0.191 | 0.285 |
|              |       | 580   | 2.470 | 0.186 | 0.285 |
|              |       | 590   | 2.468 | 0.184 | 0.286 |
|              |       | 600   | 2.493 | 0.208 | 0.286 |
| GFET<br>#K18 | 10    | -50   | 2.272 | 2.278 | -     |
|              |       | -40   | 2.282 |       |       |
|              |       | -30   | 2.277 |       |       |
|              |       | -20   | 2.284 |       |       |
|              |       | -10   | 2.270 |       |       |
|              |       | 0     | 2.281 | 0.004 | 0.000 |
|              |       | 10    | 2.313 | 0.035 | 0.034 |
|              |       | 20    | 2.342 | 0.065 | 0.064 |
|              |       | 30    | 2.361 | 0.084 | 0.091 |
|              |       | 40    | 2.374 | 0.096 | 0.114 |
|              |       | 50    | 2.385 | 0.107 | 0.135 |
|              |       | 60    | 2.401 | 0.123 | 0.153 |
|              |       | 70    | 2.423 | 0.146 | 0.169 |
|              |       | 80    | 2.429 | 0.151 | 0.184 |
|              |       | 90    | 2.433 | 0.155 | 0.196 |
|              |       | 100   | 2.436 | 0.158 | 0.207 |
|              |       | 110   | 2.440 | 0.162 | 0.217 |
|              |       | 120   | 2.449 | 0.171 | 0.225 |
|              |       | 130   | 2.462 | 0.184 | 0.233 |
|              |       | 140   | 2.465 | 0.188 | 0.240 |
|              |       | 150   | 2.474 | 0.196 | 0.245 |
|              |       | 160   | 2.478 | 0.201 | 0.251 |
|              |       | 170   | 2.472 | 0.194 | 0.255 |
|              |       | 180   | 2.472 | 0.194 | 0.259 |
|              |       | 190   | 2.485 | 0.207 | 0.263 |
|              |       | 200   | 2.487 | 0.209 | 0.266 |
|              |       | 210   | 2.489 | 0.211 | 0.269 |
|              |       | 220   | 2.486 | 0.208 | 0.271 |
|              |       | 230   | 2.482 | 0.204 | 0.273 |
|              |       | 240   | 2.498 | 0.221 | 0.275 |
|              |       | 250   | 2.496 | 0.218 | 0.277 |
|              |       | 260   | 2.498 | 0.220 | 0.278 |
|              |       | 270   | 2.496 | 0.218 | 0.279 |
|              |       | 280   | 2.496 | 0.219 | 0.281 |
|              |       | 290   | 2.491 | 0.213 | 0.282 |
|              |       | 300   | 2.491 | 0.213 | 0.283 |
|              |       | 310   | 2.507 | 0.229 | 0.283 |
|              |       | 320   | 2.503 | 0.225 | 0.284 |
|              |       | 330   | 2.511 | 0.233 | 0.285 |
| 340          | 2.506 | 0.228 | 0.285 |       |       |
| 350          | 2.500 | 0.222 | 0.286 |       |       |
| 360          | 2.516 | 0.238 | 0.286 |       |       |
| 370          | 2.506 | 0.229 | 0.286 |       |       |
| 380          | 2.504 | 0.226 | 0.287 |       |       |
| 390          | 2.505 | 0.227 | 0.287 |       |       |

|              |       |       |       |        |       |
|--------------|-------|-------|-------|--------|-------|
|              |       | 400   | 2.512 | 0.234  | 0.287 |
|              |       | 410   | 2.493 | 0.215  | 0.287 |
|              |       | 420   | 2.510 | 0.232  | 0.288 |
|              |       | 430   | 2.513 | 0.235  | 0.288 |
|              |       | 440   | 2.512 | 0.234  | 0.288 |
|              |       | 450   | 2.502 | 0.225  | 0.288 |
|              |       | 460   | 2.504 | 0.227  | 0.288 |
|              |       | 470   | 2.501 | 0.223  | 0.288 |
|              |       | 480   | 2.505 | 0.227  | 0.288 |
|              |       | 490   | 2.513 | 0.235  | 0.289 |
|              |       | 500   | 2.520 | 0.243  | 0.289 |
|              |       | 510   | 2.510 | 0.233  | 0.289 |
|              |       | 520   | 2.516 | 0.238  | 0.289 |
|              |       | 530   | 2.517 | 0.240  | 0.289 |
|              |       | 540   | 2.513 | 0.235  | 0.289 |
|              |       | 550   | 2.516 | 0.238  | 0.289 |
|              |       | 560   | 2.516 | 0.238  | 0.289 |
|              |       | 570   | 2.501 | 0.223  | 0.289 |
|              |       | 580   | 2.517 | 0.239  | 0.289 |
|              |       | 590   | 2.506 | 0.229  | 0.289 |
|              |       | 600   | 2.521 | 0.243  | 0.289 |
| GFET<br>#K19 | 25    | -50   | 2.291 | 2.281  | -     |
|              |       | -40   | 2.278 |        |       |
|              |       | -30   | 2.277 |        |       |
|              |       | -20   | 2.277 |        |       |
|              |       | -10   | 2.290 |        |       |
|              |       | 0     | 2.275 | -0.006 | 0.000 |
|              |       | 10    | 2.337 | 0.056  | 0.070 |
|              |       | 20    | 2.400 | 0.119  | 0.124 |
|              |       | 30    | 2.426 | 0.145  | 0.164 |
|              |       | 40    | 2.448 | 0.167  | 0.194 |
|              |       | 50    | 2.458 | 0.177  | 0.217 |
|              |       | 60    | 2.481 | 0.200  | 0.235 |
|              |       | 70    | 2.502 | 0.221  | 0.248 |
|              |       | 80    | 2.510 | 0.229  | 0.258 |
|              |       | 90    | 2.510 | 0.229  | 0.266 |
|              |       | 100   | 2.499 | 0.218  | 0.271 |
|              |       | 110   | 2.526 | 0.245  | 0.276 |
|              |       | 120   | 2.527 | 0.246  | 0.279 |
|              |       | 130   | 2.510 | 0.229  | 0.281 |
|              |       | 140   | 2.532 | 0.251  | 0.283 |
|              |       | 150   | 2.523 | 0.242  | 0.285 |
|              |       | 160   | 2.539 | 0.257  | 0.286 |
|              |       | 170   | 2.522 | 0.241  | 0.287 |
|              |       | 180   | 2.527 | 0.246  | 0.287 |
|              |       | 190   | 2.536 | 0.255  | 0.288 |
|              |       | 200   | 2.547 | 0.266  | 0.288 |
|              |       | 210   | 2.526 | 0.245  | 0.288 |
|              |       | 220   | 2.542 | 0.261  | 0.289 |
|              |       | 230   | 2.539 | 0.258  | 0.289 |
|              |       | 240   | 2.532 | 0.250  | 0.289 |
|              |       | 250   | 2.538 | 0.256  | 0.289 |
|              |       | 260   | 2.543 | 0.261  | 0.289 |
|              |       | 270   | 2.545 | 0.263  | 0.289 |
|              |       | 280   | 2.547 | 0.266  | 0.289 |
|              |       | 290   | 2.544 | 0.263  | 0.289 |
| 300          | 2.546 | 0.265 | 0.289 |        |       |
| 310          | 2.539 | 0.258 | 0.289 |        |       |
| 320          | 2.547 | 0.266 | 0.289 |        |       |
| 330          | 2.539 | 0.258 | 0.289 |        |       |
| 340          | 2.549 | 0.267 | 0.289 |        |       |
| 350          | 2.534 | 0.253 | 0.289 |        |       |

|              |       |       |       |        |       |
|--------------|-------|-------|-------|--------|-------|
|              |       | 360   | 2.537 | 0.256  | 0.289 |
|              |       | 370   | 2.544 | 0.263  | 0.289 |
|              |       | 380   | 2.541 | 0.260  | 0.289 |
|              |       | 390   | 2.539 | 0.258  | 0.289 |
|              |       | 400   | 2.538 | 0.257  | 0.289 |
|              |       | 410   | 2.538 | 0.257  | 0.289 |
|              |       | 420   | 2.534 | 0.252  | 0.289 |
|              |       | 430   | 2.547 | 0.266  | 0.289 |
|              |       | 440   | 2.545 | 0.264  | 0.289 |
|              |       | 450   | 2.536 | 0.255  | 0.289 |
|              |       | 460   | 2.534 | 0.253  | 0.289 |
|              |       | 470   | 2.534 | 0.253  | 0.289 |
|              |       | 480   | 2.534 | 0.253  | 0.289 |
|              |       | 490   | 2.536 | 0.255  | 0.289 |
|              |       | 500   | 2.540 | 0.259  | 0.289 |
|              |       | 510   | 2.545 | 0.263  | 0.289 |
|              |       | 520   | 2.540 | 0.258  | 0.289 |
|              |       | 530   | 2.551 | 0.270  | 0.289 |
|              |       | 540   | 2.542 | 0.261  | 0.289 |
|              |       | 550   | 2.545 | 0.264  | 0.289 |
|              |       | 560   | 2.534 | 0.253  | 0.289 |
|              |       | 570   | 2.542 | 0.260  | 0.289 |
|              |       | 580   | 2.546 | 0.264  | 0.289 |
|              |       | 590   | 2.539 | 0.258  | 0.289 |
|              |       | 600   | 2.535 | 0.253  | 0.289 |
| GFET<br>#K20 | 50    | -50   | 2.266 | 2.271  | -     |
|              |       | -40   | 2.275 |        |       |
|              |       | -30   | 2.269 |        |       |
|              |       | -20   | 2.270 |        |       |
|              |       | -10   | 2.280 |        |       |
|              |       | 0     | 2.267 | -0.004 | 0.000 |
|              |       | 10    | 2.393 | 0.122  | 0.120 |
|              |       | 20    | 2.454 | 0.183  | 0.190 |
|              |       | 30    | 2.499 | 0.228  | 0.231 |
|              |       | 40    | 2.510 | 0.239  | 0.255 |
|              |       | 50    | 2.522 | 0.251  | 0.269 |
|              |       | 60    | 2.535 | 0.264  | 0.277 |
|              |       | 70    | 2.545 | 0.274  | 0.282 |
|              |       | 80    | 2.553 | 0.282  | 0.285 |
|              |       | 90    | 2.546 | 0.275  | 0.287 |
|              |       | 100   | 2.538 | 0.267  | 0.288 |
|              |       | 110   | 2.546 | 0.276  | 0.288 |
|              |       | 120   | 2.551 | 0.280  | 0.289 |
|              |       | 130   | 2.553 | 0.282  | 0.289 |
|              |       | 140   | 2.555 | 0.284  | 0.289 |
|              |       | 150   | 2.542 | 0.271  | 0.289 |
|              |       | 160   | 2.547 | 0.276  | 0.289 |
|              |       | 170   | 2.553 | 0.282  | 0.289 |
|              |       | 180   | 2.562 | 0.292  | 0.289 |
|              |       | 190   | 2.561 | 0.290  | 0.289 |
|              |       | 200   | 2.558 | 0.287  | 0.289 |
|              |       | 210   | 2.556 | 0.285  | 0.289 |
|              |       | 220   | 2.555 | 0.284  | 0.289 |
|              |       | 230   | 2.551 | 0.280  | 0.289 |
|              |       | 240   | 2.549 | 0.278  | 0.289 |
|              |       | 250   | 2.553 | 0.282  | 0.289 |
|              |       | 260   | 2.556 | 0.285  | 0.289 |
|              |       | 270   | 2.544 | 0.273  | 0.289 |
| 280          | 2.558 | 0.287 | 0.289 |        |       |
| 290          | 2.548 | 0.277 | 0.289 |        |       |
| 300          | 2.549 | 0.278 | 0.289 |        |       |
| 310          | 2.546 | 0.275 | 0.289 |        |       |

|              |       |       |       |        |       |
|--------------|-------|-------|-------|--------|-------|
|              |       | 320   | 2.558 | 0.287  | 0.289 |
|              |       | 330   | 2.554 | 0.283  | 0.289 |
|              |       | 340   | 2.549 | 0.278  | 0.289 |
|              |       | 350   | 2.558 | 0.287  | 0.289 |
|              |       | 360   | 2.563 | 0.292  | 0.289 |
|              |       | 370   | 2.555 | 0.284  | 0.289 |
|              |       | 380   | 2.547 | 0.276  | 0.289 |
|              |       | 390   | 2.560 | 0.289  | 0.289 |
|              |       | 400   | 2.550 | 0.279  | 0.289 |
|              |       | 410   | 2.553 | 0.282  | 0.289 |
|              |       | 420   | 2.554 | 0.283  | 0.289 |
|              |       | 430   | 2.553 | 0.282  | 0.289 |
|              |       | 440   | 2.547 | 0.276  | 0.289 |
|              |       | 450   | 2.553 | 0.282  | 0.289 |
|              |       | 460   | 2.555 | 0.285  | 0.289 |
|              |       | 470   | 2.548 | 0.277  | 0.289 |
|              |       | 480   | 2.556 | 0.285  | 0.289 |
|              |       | 490   | 2.558 | 0.287  | 0.289 |
|              |       | 500   | 2.550 | 0.279  | 0.289 |
|              |       | 510   | 2.555 | 0.284  | 0.289 |
|              |       | 520   | 2.552 | 0.281  | 0.289 |
|              |       | 530   | 2.548 | 0.277  | 0.289 |
|              |       | 540   | 2.560 | 0.289  | 0.289 |
|              |       | 550   | 2.558 | 0.287  | 0.289 |
|              |       | 560   | 2.557 | 0.286  | 0.289 |
|              |       | 570   | 2.552 | 0.281  | 0.289 |
|              |       | 580   | 2.555 | 0.284  | 0.289 |
|              |       | 590   | 2.564 | 0.293  | 0.289 |
|              |       | 600   | 2.553 | 0.282  | 0.289 |
| GFET<br>#K21 | 100   | -50   | 2.292 | 2.289  | -     |
|              |       | -40   | 2.296 |        |       |
|              |       | -30   | 2.287 |        |       |
|              |       | -20   | 2.293 |        |       |
|              |       | -10   | 2.280 |        |       |
|              |       | 0     | 2.287 | -0.002 | 0.000 |
|              |       | 10    | 2.469 | 0.179  | 0.187 |
|              |       | 20    | 2.513 | 0.224  | 0.253 |
|              |       | 30    | 2.561 | 0.272  | 0.277 |
|              |       | 40    | 2.568 | 0.278  | 0.285 |
|              |       | 50    | 2.562 | 0.272  | 0.288 |
|              |       | 60    | 2.568 | 0.279  | 0.289 |
|              |       | 70    | 2.581 | 0.292  | 0.289 |
|              |       | 80    | 2.572 | 0.283  | 0.289 |
|              |       | 90    | 2.582 | 0.293  | 0.289 |
|              |       | 100   | 2.574 | 0.285  | 0.289 |
|              |       | 110   | 2.581 | 0.291  | 0.289 |
|              |       | 120   | 2.577 | 0.288  | 0.289 |
|              |       | 130   | 2.576 | 0.287  | 0.289 |
|              |       | 140   | 2.572 | 0.282  | 0.289 |
|              |       | 150   | 2.576 | 0.287  | 0.289 |
|              |       | 160   | 2.567 | 0.278  | 0.289 |
|              |       | 170   | 2.568 | 0.278  | 0.289 |
|              |       | 180   | 2.581 | 0.292  | 0.289 |
|              |       | 190   | 2.574 | 0.284  | 0.289 |
|              |       | 200   | 2.577 | 0.287  | 0.289 |
|              |       | 210   | 2.581 | 0.291  | 0.289 |
|              |       | 220   | 2.572 | 0.283  | 0.289 |
| 230          | 2.582 | 0.293 | 0.289 |        |       |
| 240          | 2.579 | 0.289 | 0.289 |        |       |
| 250          | 2.563 | 0.274 | 0.289 |        |       |
| 260          | 2.581 | 0.292 | 0.289 |        |       |
| 270          | 2.582 | 0.293 | 0.289 |        |       |



|  |  |     |       |       |       |
|--|--|-----|-------|-------|-------|
|  |  | 280 | 2.560 | 0.271 | 0.289 |
|  |  | 290 | 2.580 | 0.291 | 0.289 |
|  |  | 300 | 2.577 | 0.288 | 0.289 |
|  |  | 310 | 2.566 | 0.277 | 0.289 |
|  |  | 320 | 2.580 | 0.290 | 0.289 |
|  |  | 330 | 2.584 | 0.295 | 0.289 |
|  |  | 340 | 2.578 | 0.289 | 0.289 |
|  |  | 350 | 2.571 | 0.281 | 0.289 |
|  |  | 360 | 2.580 | 0.290 | 0.289 |
|  |  | 370 | 2.579 | 0.290 | 0.289 |
|  |  | 380 | 2.576 | 0.286 | 0.289 |
|  |  | 390 | 2.564 | 0.275 | 0.289 |
|  |  | 400 | 2.576 | 0.286 | 0.289 |
|  |  | 410 | 2.570 | 0.281 | 0.289 |
|  |  | 420 | 2.580 | 0.291 | 0.289 |
|  |  | 430 | 2.581 | 0.291 | 0.289 |
|  |  | 440 | 2.574 | 0.285 | 0.289 |
|  |  | 450 | 2.574 | 0.284 | 0.289 |
|  |  | 460 | 2.577 | 0.288 | 0.289 |
|  |  | 470 | 2.580 | 0.291 | 0.289 |
|  |  | 480 | 2.583 | 0.293 | 0.289 |
|  |  | 490 | 2.576 | 0.286 | 0.289 |
|  |  | 500 | 2.562 | 0.273 | 0.289 |
|  |  | 510 | 2.563 | 0.274 | 0.289 |
|  |  | 520 | 2.576 | 0.287 | 0.289 |
|  |  | 530 | 2.579 | 0.290 | 0.289 |
|  |  | 540 | 2.571 | 0.281 | 0.289 |
|  |  | 550 | 2.581 | 0.292 | 0.289 |
|  |  | 560 | 2.572 | 0.282 | 0.289 |
|  |  | 570 | 2.575 | 0.285 | 0.289 |
|  |  | 580 | 2.568 | 0.279 | 0.289 |
|  |  | 590 | 2.571 | 0.281 | 0.289 |
|  |  | 600 | 2.562 | 0.273 | 0.289 |

## 6 Dataset of cross-reaction measurements

Following the experimental protocol in **Section 4**, the cross-reactivity of three antibodies specific to mismatched biomarkers at various concentrations were tested using 42 GFET devices (#C1 – #C42), respectively. For each mismatched biomarker (CEA, AFP or PTH), 7 GFET devices were disposably used to measure the samples (1, 2.5, 5, 10, 25, 50 and 100 nM).

Corresponding to **Figure 3** in the main text, the detailed experimental data are presented in **Table S4 – S9**. We learn that all the cross-reactions are very weak.

**Table S4.** Responses of CEA antibody-AFP cross-reaction.

| Device number | AFP concentration, $c^{(AFP)}$ (nM) | Time, $t$ (s) | Experimental results |                                                        | Fitting results |
|---------------|-------------------------------------|---------------|----------------------|--------------------------------------------------------|-----------------|
|               |                                     |               | $I_d$ ( $\mu A$ )    | $\Delta I_d = I_d - \overline{I_d}(t < 0)$ ( $\mu A$ ) | N/A             |
| GFET #C1      | 1                                   | -50           | 2.291                | 2.285                                                  | -               |
|               |                                     | -40           | 2.275                |                                                        |                 |
|               |                                     | -30           | 2.291                |                                                        |                 |
|               |                                     | -20           | 2.284                |                                                        |                 |
|               |                                     | -10           | 2.282                |                                                        |                 |
|               |                                     | 0             | 2.303                | 0.019                                                  | -               |
|               |                                     | 10            | 2.286                | 0.002                                                  | -               |
|               |                                     | 20            | 2.289                | 0.004                                                  | -               |
|               |                                     | 30            | 2.283                | -0.002                                                 | -               |
|               |                                     | 40            | 2.297                | 0.012                                                  | -               |
|               |                                     | 50            | 2.302                | 0.017                                                  | -               |
|               |                                     | 60            | 2.296                | 0.012                                                  | -               |
|               |                                     | 70            | 2.292                | 0.007                                                  | -               |
|               |                                     | 80            | 2.297                | 0.013                                                  | -               |
|               |                                     | 90            | 2.313                | 0.028                                                  | -               |
|               |                                     | 100           | 2.284                | 0.000                                                  | -               |
|               |                                     | 110           | 2.297                | 0.012                                                  | -               |
|               |                                     | 120           | 2.295                | 0.011                                                  | -               |
|               |                                     | 130           | 2.287                | 0.003                                                  | -               |
|               |                                     | 140           | 2.297                | 0.012                                                  | -               |
|               |                                     | 150           | 2.287                | 0.002                                                  | -               |
|               |                                     | 160           | 2.300                | 0.016                                                  | -               |
|               |                                     | 170           | 2.298                | 0.013                                                  | -               |
|               |                                     | 180           | 2.296                | 0.012                                                  | -               |
|               |                                     | 190           | 2.306                | 0.021                                                  | -               |
|               |                                     | 200           | 2.295                | 0.010                                                  | -               |
|               |                                     | 210           | 2.278                | -0.006                                                 | -               |
|               |                                     | 220           | 2.297                | 0.012                                                  | -               |
|               |                                     | 230           | 2.314                | 0.029                                                  | -               |
|               |                                     | 240           | 2.306                | 0.022                                                  | -               |
|               |                                     | 250           | 2.293                | 0.008                                                  | -               |
|               |                                     | 260           | 2.301                | 0.017                                                  | -               |
|               |                                     | 270           | 2.292                | 0.008                                                  | -               |
|               |                                     | 280           | 2.291                | 0.007                                                  | -               |
|               |                                     | 290           | 2.283                | -0.002                                                 | -               |
|               |                                     | 300           | 2.318                | 0.034                                                  | -               |
|               |                                     | 310           | 2.299                | 0.014                                                  | -               |
|               |                                     | 320           | 2.299                | 0.014                                                  | -               |
|               |                                     | 330           | 2.309                | 0.025                                                  | -               |
|               |                                     | 340           | 2.301                | 0.017                                                  | -               |
|               |                                     | 350           | 2.290                | 0.005                                                  | -               |
|               |                                     | 360           | 2.298                | 0.014                                                  | -               |
|               |                                     | 370           | 2.290                | 0.006                                                  | -               |
|               |                                     | 380           | 2.297                | 0.012                                                  | -               |
|               |                                     | 390           | 2.282                | -0.003                                                 | -               |
|               |                                     | 400           | 2.288                | 0.004                                                  | -               |
|               |                                     | 410           | 2.310                | 0.025                                                  | -               |
|               |                                     | 420           | 2.291                | 0.007                                                  | -               |
|               |                                     | 430           | 2.304                | 0.019                                                  | -               |
|               |                                     | 440           | 2.297                | 0.013                                                  | -               |
|               |                                     | 450           | 2.293                | 0.009                                                  | -               |
|               |                                     | 460           | 2.286                | 0.002                                                  | -               |
| 470           | 2.296                               | 0.012         | -                    |                                                        |                 |
| 480           | 2.293                               | 0.009         | -                    |                                                        |                 |
| 490           | 2.297                               | 0.013         | -                    |                                                        |                 |
| 500           | 2.292                               | 0.008         | -                    |                                                        |                 |
| 510           | 2.312                               | 0.027         | -                    |                                                        |                 |
| 520           | 2.291                               | 0.007         | -                    |                                                        |                 |

|             |       |        |       |        |   |
|-------------|-------|--------|-------|--------|---|
|             |       | 530    | 2.290 | 0.006  | - |
|             |       | 540    | 2.298 | 0.014  | - |
|             |       | 550    | 2.312 | 0.028  | - |
|             |       | 560    | 2.301 | 0.017  | - |
|             |       | 570    | 2.302 | 0.017  | - |
|             |       | 580    | 2.301 | 0.017  | - |
|             |       | 590    | 2.280 | -0.005 | - |
|             |       | 600    | 2.312 | 0.027  | - |
| GFET<br>#C2 | 2.5   | -50    | 2.305 | 2.310  | - |
|             |       | -40    | 2.310 |        |   |
|             |       | -30    | 2.308 |        |   |
|             |       | -20    | 2.313 |        |   |
|             |       | -10    | 2.311 |        |   |
|             |       | 0      | 2.323 | 0.013  | - |
|             |       | 10     | 2.311 | 0.001  | - |
|             |       | 20     | 2.309 | -0.001 | - |
|             |       | 30     | 2.295 | -0.015 | - |
|             |       | 40     | 2.326 | 0.017  | - |
|             |       | 50     | 2.312 | 0.002  | - |
|             |       | 60     | 2.326 | 0.016  | - |
|             |       | 70     | 2.305 | -0.004 | - |
|             |       | 80     | 2.312 | 0.003  | - |
|             |       | 90     | 2.310 | 0.000  | - |
|             |       | 100    | 2.295 | -0.015 | - |
|             |       | 110    | 2.312 | 0.002  | - |
|             |       | 120    | 2.315 | 0.005  | - |
|             |       | 130    | 2.302 | -0.007 | - |
|             |       | 140    | 2.304 | -0.005 | - |
|             |       | 150    | 2.295 | -0.015 | - |
|             |       | 160    | 2.338 | 0.029  | - |
|             |       | 170    | 2.329 | 0.019  | - |
|             |       | 180    | 2.316 | 0.007  | - |
|             |       | 190    | 2.324 | 0.015  | - |
|             |       | 200    | 2.326 | 0.016  | - |
|             |       | 210    | 2.312 | 0.002  | - |
|             |       | 220    | 2.312 | 0.003  | - |
|             |       | 230    | 2.312 | 0.003  | - |
|             |       | 240    | 2.317 | 0.007  | - |
|             |       | 250    | 2.331 | 0.022  | - |
|             |       | 260    | 2.329 | 0.020  | - |
|             |       | 270    | 2.299 | -0.010 | - |
|             |       | 280    | 2.325 | 0.015  | - |
|             |       | 290    | 2.324 | 0.014  | - |
|             |       | 300    | 2.307 | -0.002 | - |
|             |       | 310    | 2.309 | 0.000  | - |
|             |       | 320    | 2.327 | 0.018  | - |
|             |       | 330    | 2.327 | 0.017  | - |
|             |       | 340    | 2.301 | -0.008 | - |
|             |       | 350    | 2.335 | 0.025  | - |
|             |       | 360    | 2.313 | 0.004  | - |
|             |       | 370    | 2.322 | 0.013  | - |
|             |       | 380    | 2.323 | 0.013  | - |
|             |       | 390    | 2.310 | 0.001  | - |
|             |       | 400    | 2.315 | 0.006  | - |
|             |       | 410    | 2.316 | 0.006  | - |
|             |       | 420    | 2.333 | 0.023  | - |
| 430         | 2.320 | 0.010  | -     |        |   |
| 440         | 2.316 | 0.007  | -     |        |   |
| 450         | 2.323 | 0.013  | -     |        |   |
| 460         | 2.321 | 0.012  | -     |        |   |
| 470         | 2.300 | -0.010 | -     |        |   |
| 480         | 2.302 | -0.008 | -     |        |   |

|             |       |        |       |        |   |
|-------------|-------|--------|-------|--------|---|
|             |       | 490    | 2.322 | 0.012  | - |
|             |       | 500    | 2.318 | 0.009  | - |
|             |       | 510    | 2.325 | 0.016  | - |
|             |       | 520    | 2.334 | 0.024  | - |
|             |       | 530    | 2.319 | 0.009  | - |
|             |       | 540    | 2.321 | 0.011  | - |
|             |       | 550    | 2.305 | -0.005 | - |
|             |       | 560    | 2.340 | 0.030  | - |
|             |       | 570    | 2.324 | 0.015  | - |
|             |       | 580    | 2.318 | 0.008  | - |
|             |       | 590    | 2.332 | 0.022  | - |
|             |       | 600    | 2.321 | 0.011  | - |
| GFET<br>#C3 | 5     | -50    | 2.291 | 2.291  | - |
|             |       | -40    | 2.288 |        |   |
|             |       | -30    | 2.285 |        |   |
|             |       | -20    | 2.310 |        |   |
|             |       | -10    | 2.279 |        |   |
|             |       | 0      | 2.274 | -0.017 | - |
|             |       | 10     | 2.290 | -0.001 | - |
|             |       | 20     | 2.289 | -0.002 | - |
|             |       | 30     | 2.270 | -0.021 | - |
|             |       | 40     | 2.281 | -0.009 | - |
|             |       | 50     | 2.263 | -0.028 | - |
|             |       | 60     | 2.294 | 0.003  | - |
|             |       | 70     | 2.267 | -0.024 | - |
|             |       | 80     | 2.287 | -0.004 | - |
|             |       | 90     | 2.284 | -0.006 | - |
|             |       | 100    | 2.285 | -0.006 | - |
|             |       | 110    | 2.275 | -0.016 | - |
|             |       | 120    | 2.297 | 0.007  | - |
|             |       | 130    | 2.291 | 0.000  | - |
|             |       | 140    | 2.291 | 0.000  | - |
|             |       | 150    | 2.291 | 0.000  | - |
|             |       | 160    | 2.280 | -0.011 | - |
|             |       | 170    | 2.285 | -0.006 | - |
|             |       | 180    | 2.282 | -0.009 | - |
|             |       | 190    | 2.274 | -0.016 | - |
|             |       | 200    | 2.284 | -0.006 | - |
|             |       | 210    | 2.280 | -0.011 | - |
|             |       | 220    | 2.293 | 0.002  | - |
|             |       | 230    | 2.269 | -0.021 | - |
|             |       | 240    | 2.286 | -0.005 | - |
|             |       | 250    | 2.267 | -0.023 | - |
|             |       | 260    | 2.282 | -0.008 | - |
|             |       | 270    | 2.281 | -0.009 | - |
|             |       | 280    | 2.282 | -0.009 | - |
|             |       | 290    | 2.275 | -0.016 | - |
|             |       | 300    | 2.281 | -0.010 | - |
|             |       | 310    | 2.285 | -0.005 | - |
|             |       | 320    | 2.286 | -0.004 | - |
|             |       | 330    | 2.297 | 0.006  | - |
|             |       | 340    | 2.293 | 0.003  | - |
|             |       | 350    | 2.278 | -0.013 | - |
|             |       | 360    | 2.296 | 0.006  | - |
|             |       | 370    | 2.268 | -0.023 | - |
|             |       | 380    | 2.285 | -0.006 | - |
| 390         | 2.305 | 0.014  | -     |        |   |
| 400         | 2.283 | -0.008 | -     |        |   |
| 410         | 2.277 | -0.014 | -     |        |   |
| 420         | 2.304 | 0.013  | -     |        |   |
| 430         | 2.276 | -0.014 | -     |        |   |
| 440         | 2.296 | 0.005  | -     |        |   |

|             |       |        |       |        |   |
|-------------|-------|--------|-------|--------|---|
|             |       | 450    | 2.279 | -0.011 | - |
|             |       | 460    | 2.298 | 0.007  | - |
|             |       | 470    | 2.291 | 0.000  | - |
|             |       | 480    | 2.277 | -0.013 | - |
|             |       | 490    | 2.289 | -0.001 | - |
|             |       | 500    | 2.268 | -0.023 | - |
|             |       | 510    | 2.266 | -0.025 | - |
|             |       | 520    | 2.296 | 0.005  | - |
|             |       | 530    | 2.278 | -0.013 | - |
|             |       | 540    | 2.294 | 0.004  | - |
|             |       | 550    | 2.289 | -0.002 | - |
|             |       | 560    | 2.283 | -0.007 | - |
|             |       | 570    | 2.284 | -0.007 | - |
|             |       | 580    | 2.304 | 0.013  | - |
|             |       | 590    | 2.302 | 0.012  | - |
|             |       | 600    | 2.292 | 0.002  | - |
| GFET<br>#C4 | 10    | -50    | 2.288 | 2.287  | - |
|             |       | -40    | 2.280 |        |   |
|             |       | -30    | 2.287 |        |   |
|             |       | -20    | 2.278 |        |   |
|             |       | -10    | 2.299 |        |   |
|             |       | 0      | 2.287 | 0.000  | - |
|             |       | 10     | 2.277 | -0.010 | - |
|             |       | 20     | 2.271 | -0.016 | - |
|             |       | 30     | 2.266 | -0.020 | - |
|             |       | 40     | 2.281 | -0.005 | - |
|             |       | 50     | 2.287 | 0.000  | - |
|             |       | 60     | 2.274 | -0.013 | - |
|             |       | 70     | 2.286 | -0.001 | - |
|             |       | 80     | 2.292 | 0.005  | - |
|             |       | 90     | 2.274 | -0.012 | - |
|             |       | 100    | 2.279 | -0.007 | - |
|             |       | 110    | 2.268 | -0.018 | - |
|             |       | 120    | 2.285 | -0.002 | - |
|             |       | 130    | 2.290 | 0.003  | - |
|             |       | 140    | 2.292 | 0.005  | - |
|             |       | 150    | 2.278 | -0.009 | - |
|             |       | 160    | 2.267 | -0.019 | - |
|             |       | 170    | 2.269 | -0.018 | - |
|             |       | 180    | 2.284 | -0.002 | - |
|             |       | 190    | 2.284 | -0.003 | - |
|             |       | 200    | 2.265 | -0.022 | - |
|             |       | 210    | 2.288 | 0.002  | - |
|             |       | 220    | 2.287 | 0.000  | - |
|             |       | 230    | 2.282 | -0.005 | - |
|             |       | 240    | 2.281 | -0.006 | - |
|             |       | 250    | 2.290 | 0.003  | - |
|             |       | 260    | 2.295 | 0.008  | - |
|             |       | 270    | 2.287 | 0.000  | - |
|             |       | 280    | 2.292 | 0.005  | - |
|             |       | 290    | 2.286 | 0.000  | - |
|             |       | 300    | 2.283 | -0.004 | - |
| 310         | 2.284 | -0.002 | -     |        |   |
| 320         | 2.282 | -0.005 | -     |        |   |
| 330         | 2.280 | -0.006 | -     |        |   |
| 340         | 2.294 | 0.007  | -     |        |   |
| 350         | 2.287 | 0.001  | -     |        |   |
| 360         | 2.301 | 0.014  | -     |        |   |
| 370         | 2.294 | 0.008  | -     |        |   |
| 380         | 2.283 | -0.003 | -     |        |   |
| 390         | 2.299 | 0.012  | -     |        |   |
| 400         | 2.297 | 0.010  | -     |        |   |

|             |       |        |       |        |   |
|-------------|-------|--------|-------|--------|---|
|             |       | 410    | 2.290 | 0.003  | - |
|             |       | 420    | 2.300 | 0.013  | - |
|             |       | 430    | 2.286 | -0.001 | - |
|             |       | 440    | 2.296 | 0.010  | - |
|             |       | 450    | 2.275 | -0.011 | - |
|             |       | 460    | 2.285 | -0.002 | - |
|             |       | 470    | 2.282 | -0.005 | - |
|             |       | 480    | 2.298 | 0.011  | - |
|             |       | 490    | 2.294 | 0.007  | - |
|             |       | 500    | 2.291 | 0.004  | - |
|             |       | 510    | 2.272 | -0.015 | - |
|             |       | 520    | 2.277 | -0.009 | - |
|             |       | 530    | 2.278 | -0.008 | - |
|             |       | 540    | 2.276 | -0.011 | - |
|             |       | 550    | 2.290 | 0.003  | - |
|             |       | 560    | 2.301 | 0.014  | - |
|             |       | 570    | 2.309 | 0.023  | - |
|             |       | 580    | 2.303 | 0.016  | - |
|             |       | 590    | 2.293 | 0.006  | - |
|             |       | 600    | 2.286 | 0.000  | - |
| GFET<br>#C5 | 25    | -50    | 2.288 | 2.289  | - |
|             |       | -40    | 2.296 |        |   |
|             |       | -30    | 2.291 |        |   |
|             |       | -20    | 2.285 |        |   |
|             |       | -10    | 2.285 |        |   |
|             |       | 0      | 2.303 | 0.014  | - |
|             |       | 10     | 2.301 | 0.012  | - |
|             |       | 20     | 2.289 | 0.000  | - |
|             |       | 30     | 2.313 | 0.023  | - |
|             |       | 40     | 2.289 | -0.001 | - |
|             |       | 50     | 2.299 | 0.010  | - |
|             |       | 60     | 2.291 | 0.002  | - |
|             |       | 70     | 2.290 | 0.001  | - |
|             |       | 80     | 2.292 | 0.003  | - |
|             |       | 90     | 2.287 | -0.002 | - |
|             |       | 100    | 2.289 | 0.000  | - |
|             |       | 110    | 2.297 | 0.008  | - |
|             |       | 120    | 2.300 | 0.011  | - |
|             |       | 130    | 2.305 | 0.016  | - |
|             |       | 140    | 2.306 | 0.016  | - |
|             |       | 150    | 2.296 | 0.007  | - |
|             |       | 160    | 2.307 | 0.018  | - |
|             |       | 170    | 2.295 | 0.005  | - |
|             |       | 180    | 2.315 | 0.026  | - |
|             |       | 190    | 2.298 | 0.009  | - |
|             |       | 200    | 2.293 | 0.004  | - |
|             |       | 210    | 2.301 | 0.012  | - |
|             |       | 220    | 2.295 | 0.006  | - |
|             |       | 230    | 2.286 | -0.003 | - |
|             |       | 240    | 2.308 | 0.019  | - |
|             |       | 250    | 2.283 | -0.006 | - |
|             |       | 260    | 2.284 | -0.006 | - |
|             |       | 270    | 2.311 | 0.022  | - |
|             |       | 280    | 2.287 | -0.002 | - |
|             |       | 290    | 2.306 | 0.017  | - |
|             |       | 300    | 2.283 | -0.006 | - |
| 310         | 2.300 | 0.011  | -     |        |   |
| 320         | 2.307 | 0.018  | -     |        |   |
| 330         | 2.308 | 0.018  | -     |        |   |
| 340         | 2.287 | -0.003 | -     |        |   |
| 350         | 2.301 | 0.012  | -     |        |   |
| 360         | 2.293 | 0.004  | -     |        |   |

|             |       |        |       |        |   |
|-------------|-------|--------|-------|--------|---|
|             |       | 370    | 2.310 | 0.020  | - |
|             |       | 380    | 2.302 | 0.013  | - |
|             |       | 390    | 2.300 | 0.010  | - |
|             |       | 400    | 2.277 | -0.012 | - |
|             |       | 410    | 2.293 | 0.004  | - |
|             |       | 420    | 2.304 | 0.015  | - |
|             |       | 430    | 2.314 | 0.025  | - |
|             |       | 440    | 2.305 | 0.015  | - |
|             |       | 450    | 2.304 | 0.015  | - |
|             |       | 460    | 2.285 | -0.004 | - |
|             |       | 470    | 2.297 | 0.008  | - |
|             |       | 480    | 2.312 | 0.023  | - |
|             |       | 490    | 2.300 | 0.011  | - |
|             |       | 500    | 2.311 | 0.022  | - |
|             |       | 510    | 2.293 | 0.004  | - |
|             |       | 520    | 2.321 | 0.032  | - |
|             |       | 530    | 2.302 | 0.013  | - |
|             |       | 540    | 2.293 | 0.004  | - |
|             |       | 550    | 2.321 | 0.031  | - |
|             |       | 560    | 2.310 | 0.021  | - |
|             |       | 570    | 2.291 | 0.001  | - |
|             |       | 580    | 2.288 | -0.001 | - |
|             |       | 590    | 2.308 | 0.019  | - |
|             |       | 600    | 2.293 | 0.004  | - |
| GFET<br>#C6 | 50    | -50    | 2.300 | 2.293  | - |
|             |       | -40    | 2.281 |        |   |
|             |       | -30    | 2.296 |        |   |
|             |       | -20    | 2.293 |        |   |
|             |       | -10    | 2.294 |        |   |
|             |       | 0      | 2.288 | -0.005 | - |
|             |       | 10     | 2.290 | -0.002 | - |
|             |       | 20     | 2.278 | -0.014 | - |
|             |       | 30     | 2.276 | -0.017 | - |
|             |       | 40     | 2.289 | -0.004 | - |
|             |       | 50     | 2.276 | -0.017 | - |
|             |       | 60     | 2.313 | 0.020  | - |
|             |       | 70     | 2.272 | -0.021 | - |
|             |       | 80     | 2.282 | -0.011 | - |
|             |       | 90     | 2.302 | 0.010  | - |
|             |       | 100    | 2.294 | 0.001  | - |
|             |       | 110    | 2.290 | -0.002 | - |
|             |       | 120    | 2.297 | 0.005  | - |
|             |       | 130    | 2.281 | -0.012 | - |
|             |       | 140    | 2.277 | -0.015 | - |
|             |       | 150    | 2.294 | 0.001  | - |
|             |       | 160    | 2.304 | 0.011  | - |
|             |       | 170    | 2.301 | 0.009  | - |
|             |       | 180    | 2.277 | -0.016 | - |
|             |       | 190    | 2.279 | -0.014 | - |
|             |       | 200    | 2.289 | -0.004 | - |
|             |       | 210    | 2.275 | -0.018 | - |
|             |       | 220    | 2.297 | 0.004  | - |
|             |       | 230    | 2.295 | 0.003  | - |
|             |       | 240    | 2.290 | -0.003 | - |
|             |       | 250    | 2.294 | 0.001  | - |
|             |       | 260    | 2.287 | -0.005 | - |
| 270         | 2.301 | 0.008  | -     |        |   |
| 280         | 2.298 | 0.006  | -     |        |   |
| 290         | 2.283 | -0.010 | -     |        |   |
| 300         | 2.310 | 0.018  | -     |        |   |
| 310         | 2.292 | -0.001 | -     |        |   |
| 320         | 2.292 | -0.001 | -     |        |   |



|             |       |       |       |        |   |
|-------------|-------|-------|-------|--------|---|
|             |       | 330   | 2.302 | 0.009  | - |
|             |       | 340   | 2.322 | 0.029  | - |
|             |       | 350   | 2.305 | 0.012  | - |
|             |       | 360   | 2.298 | 0.005  | - |
|             |       | 370   | 2.296 | 0.003  | - |
|             |       | 380   | 2.296 | 0.003  | - |
|             |       | 390   | 2.290 | -0.003 | - |
|             |       | 400   | 2.291 | -0.002 | - |
|             |       | 410   | 2.270 | -0.023 | - |
|             |       | 420   | 2.297 | 0.005  | - |
|             |       | 430   | 2.308 | 0.016  | - |
|             |       | 440   | 2.301 | 0.008  | - |
|             |       | 450   | 2.308 | 0.015  | - |
|             |       | 460   | 2.298 | 0.005  | - |
|             |       | 470   | 2.312 | 0.019  | - |
|             |       | 480   | 2.295 | 0.002  | - |
|             |       | 490   | 2.290 | -0.003 | - |
|             |       | 500   | 2.306 | 0.013  | - |
|             |       | 510   | 2.297 | 0.004  | - |
|             |       | 520   | 2.319 | 0.026  | - |
|             |       | 530   | 2.305 | 0.012  | - |
|             |       | 540   | 2.306 | 0.013  | - |
|             |       | 550   | 2.298 | 0.005  | - |
|             |       | 560   | 2.303 | 0.010  | - |
|             |       | 570   | 2.300 | 0.007  | - |
|             |       | 580   | 2.297 | 0.005  | - |
|             |       | 590   | 2.302 | 0.009  | - |
|             |       | 600   | 2.296 | 0.003  | - |
| GFET<br>#C7 | 100   | -50   | 2.298 | 2.288  | - |
|             |       | -40   | 2.288 |        |   |
|             |       | -30   | 2.273 |        |   |
|             |       | -20   | 2.302 |        |   |
|             |       | -10   | 2.280 |        |   |
|             |       | 0     | 2.276 | -0.012 | - |
|             |       | 10    | 2.286 | -0.002 | - |
|             |       | 20    | 2.293 | 0.005  | - |
|             |       | 30    | 2.285 | -0.003 | - |
|             |       | 40    | 2.291 | 0.003  | - |
|             |       | 50    | 2.275 | -0.013 | - |
|             |       | 60    | 2.286 | -0.003 | - |
|             |       | 70    | 2.274 | -0.014 | - |
|             |       | 80    | 2.297 | 0.009  | - |
|             |       | 90    | 2.271 | -0.017 | - |
|             |       | 100   | 2.291 | 0.003  | - |
|             |       | 110   | 2.288 | 0.000  | - |
|             |       | 120   | 2.286 | -0.002 | - |
|             |       | 130   | 2.296 | 0.007  | - |
|             |       | 140   | 2.294 | 0.006  | - |
|             |       | 150   | 2.299 | 0.010  | - |
|             |       | 160   | 2.303 | 0.015  | - |
|             |       | 170   | 2.284 | -0.004 | - |
|             |       | 180   | 2.293 | 0.005  | - |
|             |       | 190   | 2.287 | -0.001 | - |
|             |       | 200   | 2.297 | 0.008  | - |
|             |       | 210   | 2.295 | 0.006  | - |
|             |       | 220   | 2.302 | 0.013  | - |
| 230         | 2.317 | 0.028 | -     |        |   |
| 240         | 2.305 | 0.016 | -     |        |   |
| 250         | 2.302 | 0.014 | -     |        |   |
| 260         | 2.298 | 0.010 | -     |        |   |
| 270         | 2.297 | 0.009 | -     |        |   |
| 280         | 2.319 | 0.031 | -     |        |   |

|  |  |     |       |       |   |
|--|--|-----|-------|-------|---|
|  |  | 290 | 2.296 | 0.008 | – |
|  |  | 300 | 2.301 | 0.012 | – |
|  |  | 310 | 2.308 | 0.020 | – |
|  |  | 320 | 2.304 | 0.016 | – |
|  |  | 330 | 2.303 | 0.015 | – |
|  |  | 340 | 2.304 | 0.016 | – |
|  |  | 350 | 2.292 | 0.004 | – |
|  |  | 360 | 2.301 | 0.013 | – |
|  |  | 370 | 2.289 | 0.001 | – |
|  |  | 380 | 2.298 | 0.009 | – |
|  |  | 390 | 2.300 | 0.012 | – |
|  |  | 400 | 2.288 | 0.000 | – |
|  |  | 410 | 2.316 | 0.028 | – |
|  |  | 420 | 2.302 | 0.014 | – |
|  |  | 430 | 2.327 | 0.039 | – |
|  |  | 440 | 2.305 | 0.017 | – |
|  |  | 450 | 2.298 | 0.010 | – |
|  |  | 460 | 2.297 | 0.009 | – |
|  |  | 470 | 2.314 | 0.026 | – |
|  |  | 480 | 2.303 | 0.015 | – |
|  |  | 490 | 2.307 | 0.018 | – |
|  |  | 500 | 2.297 | 0.009 | – |
|  |  | 510 | 2.303 | 0.015 | – |
|  |  | 520 | 2.303 | 0.015 | – |
|  |  | 530 | 2.306 | 0.017 | – |
|  |  | 540 | 2.318 | 0.030 | – |
|  |  | 550 | 2.303 | 0.014 | – |
|  |  | 560 | 2.307 | 0.019 | – |
|  |  | 570 | 2.330 | 0.042 | – |
|  |  | 580 | 2.308 | 0.020 | – |
|  |  | 590 | 2.312 | 0.024 | – |
|  |  | 600 | 2.318 | 0.029 | – |

**Table S5.** Responses of CEA antibody-PTH cross-reaction.

| Device number | PTH concentration, $c^{(PTH)}$ (nM) | Time, $t$ (s) | Experimental results    |                                                              | Fitting results |
|---------------|-------------------------------------|---------------|-------------------------|--------------------------------------------------------------|-----------------|
|               |                                     |               | $I_d$ ( $\mu\text{A}$ ) | $\Delta I_d = I_d - \overline{I_d}(t < 0)$ ( $\mu\text{A}$ ) | N/A             |
| GFET #C8      | 1                                   | -50           | 2.274                   | 2.276                                                        | -               |
|               |                                     | -40           | 2.258                   |                                                              |                 |
|               |                                     | -30           | 2.281                   |                                                              |                 |
|               |                                     | -20           | 2.293                   |                                                              |                 |
|               |                                     | -10           | 2.273                   |                                                              |                 |
|               |                                     | 0             | 2.285                   | 0.009                                                        | -               |
|               |                                     | 10            | 2.271                   | -0.005                                                       | -               |
|               |                                     | 20            | 2.294                   | 0.018                                                        | -               |
|               |                                     | 30            | 2.264                   | -0.012                                                       | -               |
|               |                                     | 40            | 2.282                   | 0.006                                                        | -               |
|               |                                     | 50            | 2.268                   | -0.008                                                       | -               |
|               |                                     | 60            | 2.275                   | -0.001                                                       | -               |
|               |                                     | 70            | 2.270                   | -0.006                                                       | -               |
|               |                                     | 80            | 2.290                   | 0.014                                                        | -               |
|               |                                     | 90            | 2.284                   | 0.008                                                        | -               |
|               |                                     | 100           | 2.278                   | 0.002                                                        | -               |
|               |                                     | 110           | 2.276                   | 0.000                                                        | -               |
|               |                                     | 120           | 2.294                   | 0.018                                                        | -               |
|               |                                     | 130           | 2.257                   | -0.019                                                       | -               |
|               |                                     | 140           | 2.278                   | 0.002                                                        | -               |
|               |                                     | 150           | 2.276                   | 0.000                                                        | -               |
|               |                                     | 160           | 2.275                   | -0.001                                                       | -               |
|               |                                     | 170           | 2.292                   | 0.016                                                        | -               |
|               |                                     | 180           | 2.285                   | 0.009                                                        | -               |
|               |                                     | 190           | 2.294                   | 0.018                                                        | -               |
|               |                                     | 200           | 2.301                   | 0.025                                                        | -               |
|               |                                     | 210           | 2.269                   | -0.007                                                       | -               |
|               |                                     | 220           | 2.284                   | 0.008                                                        | -               |
|               |                                     | 230           | 2.293                   | 0.017                                                        | -               |
|               |                                     | 240           | 2.298                   | 0.022                                                        | -               |
|               |                                     | 250           | 2.268                   | -0.008                                                       | -               |
|               |                                     | 260           | 2.273                   | -0.003                                                       | -               |
|               |                                     | 270           | 2.294                   | 0.018                                                        | -               |
|               |                                     | 280           | 2.274                   | -0.002                                                       | -               |
|               |                                     | 290           | 2.290                   | 0.014                                                        | -               |
|               |                                     | 300           | 2.285                   | 0.009                                                        | -               |
|               |                                     | 310           | 2.292                   | 0.016                                                        | -               |
|               |                                     | 320           | 2.294                   | 0.018                                                        | -               |
|               |                                     | 330           | 2.280                   | 0.004                                                        | -               |
|               |                                     | 340           | 2.271                   | -0.005                                                       | -               |
|               |                                     | 350           | 2.261                   | -0.015                                                       | -               |
|               |                                     | 360           | 2.288                   | 0.012                                                        | -               |
|               |                                     | 370           | 2.282                   | 0.006                                                        | -               |
|               |                                     | 380           | 2.282                   | 0.006                                                        | -               |
|               |                                     | 390           | 2.286                   | 0.010                                                        | -               |
|               |                                     | 400           | 2.278                   | 0.002                                                        | -               |
|               |                                     | 410           | 2.279                   | 0.003                                                        | -               |
|               |                                     | 420           | 2.277                   | 0.001                                                        | -               |
|               |                                     | 430           | 2.276                   | 0.000                                                        | -               |
|               |                                     | 440           | 2.277                   | 0.001                                                        | -               |
|               |                                     | 450           | 2.287                   | 0.011                                                        | -               |
|               |                                     | 460           | 2.295                   | 0.019                                                        | -               |
| 470           | 2.291                               | 0.015         | -                       |                                                              |                 |
| 480           | 2.289                               | 0.013         | -                       |                                                              |                 |
| 490           | 2.290                               | 0.014         | -                       |                                                              |                 |
| 500           | 2.284                               | 0.008         | -                       |                                                              |                 |
| 510           | 2.292                               | 0.016         | -                       |                                                              |                 |
| 520           | 2.309                               | 0.033         | -                       |                                                              |                 |

|             |       |        |       |        |   |
|-------------|-------|--------|-------|--------|---|
|             |       | 530    | 2.277 | 0.001  | - |
|             |       | 540    | 2.279 | 0.003  | - |
|             |       | 550    | 2.281 | 0.005  | - |
|             |       | 560    | 2.286 | 0.010  | - |
|             |       | 570    | 2.268 | -0.008 | - |
|             |       | 580    | 2.287 | 0.011  | - |
|             |       | 590    | 2.281 | 0.005  | - |
|             |       | 600    | 2.263 | -0.013 | - |
| GFET<br>#C9 | 2.5   | -50    | 2.285 | 2.285  | - |
|             |       | -40    | 2.290 |        |   |
|             |       | -30    | 2.274 |        |   |
|             |       | -20    | 2.281 |        |   |
|             |       | -10    | 2.294 |        |   |
|             |       | 0      | 2.295 | 0.010  | - |
|             |       | 10     | 2.294 | 0.009  | - |
|             |       | 20     | 2.282 | -0.003 | - |
|             |       | 30     | 2.299 | 0.014  | - |
|             |       | 40     | 2.296 | 0.011  | - |
|             |       | 50     | 2.294 | 0.009  | - |
|             |       | 60     | 2.283 | -0.002 | - |
|             |       | 70     | 2.312 | 0.027  | - |
|             |       | 80     | 2.310 | 0.025  | - |
|             |       | 90     | 2.304 | 0.019  | - |
|             |       | 100    | 2.291 | 0.006  | - |
|             |       | 110    | 2.301 | 0.016  | - |
|             |       | 120    | 2.286 | 0.001  | - |
|             |       | 130    | 2.301 | 0.016  | - |
|             |       | 140    | 2.282 | -0.003 | - |
|             |       | 150    | 2.303 | 0.018  | - |
|             |       | 160    | 2.291 | 0.006  | - |
|             |       | 170    | 2.304 | 0.019  | - |
|             |       | 180    | 2.293 | 0.008  | - |
|             |       | 190    | 2.288 | 0.003  | - |
|             |       | 200    | 2.287 | 0.002  | - |
|             |       | 210    | 2.306 | 0.021  | - |
|             |       | 220    | 2.300 | 0.015  | - |
|             |       | 230    | 2.291 | 0.006  | - |
|             |       | 240    | 2.295 | 0.010  | - |
|             |       | 250    | 2.294 | 0.009  | - |
|             |       | 260    | 2.300 | 0.015  | - |
|             |       | 270    | 2.285 | 0.000  | - |
|             |       | 280    | 2.292 | 0.007  | - |
|             |       | 290    | 2.287 | 0.002  | - |
|             |       | 300    | 2.291 | 0.006  | - |
|             |       | 310    | 2.299 | 0.014  | - |
|             |       | 320    | 2.298 | 0.013  | - |
|             |       | 330    | 2.283 | -0.002 | - |
|             |       | 340    | 2.285 | 0.000  | - |
|             |       | 350    | 2.302 | 0.017  | - |
|             |       | 360    | 2.274 | -0.011 | - |
|             |       | 370    | 2.289 | 0.004  | - |
|             |       | 380    | 2.280 | -0.005 | - |
|             |       | 390    | 2.302 | 0.017  | - |
|             |       | 400    | 2.298 | 0.013  | - |
|             |       | 410    | 2.289 | 0.004  | - |
|             |       | 420    | 2.295 | 0.010  | - |
| 430         | 2.296 | 0.011  | -     |        |   |
| 440         | 2.280 | -0.005 | -     |        |   |
| 450         | 2.288 | 0.003  | -     |        |   |
| 460         | 2.295 | 0.010  | -     |        |   |
| 470         | 2.300 | 0.015  | -     |        |   |
| 480         | 2.292 | 0.007  | -     |        |   |

|              |       |        |       |        |   |
|--------------|-------|--------|-------|--------|---|
|              |       | 490    | 2.285 | 0.000  | - |
|              |       | 500    | 2.292 | 0.007  | - |
|              |       | 510    | 2.288 | 0.003  | - |
|              |       | 520    | 2.286 | 0.001  | - |
|              |       | 530    | 2.292 | 0.007  | - |
|              |       | 540    | 2.291 | 0.006  | - |
|              |       | 550    | 2.285 | 0.000  | - |
|              |       | 560    | 2.308 | 0.023  | - |
|              |       | 570    | 2.294 | 0.009  | - |
|              |       | 580    | 2.291 | 0.006  | - |
|              |       | 590    | 2.299 | 0.014  | - |
|              |       | 600    | 2.302 | 0.017  | - |
| GFET<br>#C10 | 5     | -50    | 2.273 | 2.274  | - |
|              |       | -40    | 2.282 |        |   |
|              |       | -30    | 2.270 |        |   |
|              |       | -20    | 2.266 |        |   |
|              |       | -10    | 2.281 |        |   |
|              |       | 0      | 2.282 | 0.008  | - |
|              |       | 10     | 2.263 | -0.011 | - |
|              |       | 20     | 2.269 | -0.005 | - |
|              |       | 30     | 2.270 | -0.004 | - |
|              |       | 40     | 2.251 | -0.023 | - |
|              |       | 50     | 2.281 | 0.007  | - |
|              |       | 60     | 2.295 | 0.021  | - |
|              |       | 70     | 2.263 | -0.011 | - |
|              |       | 80     | 2.271 | -0.003 | - |
|              |       | 90     | 2.280 | 0.006  | - |
|              |       | 100    | 2.270 | -0.004 | - |
|              |       | 110    | 2.274 | 0.000  | - |
|              |       | 120    | 2.264 | -0.010 | - |
|              |       | 130    | 2.287 | 0.013  | - |
|              |       | 140    | 2.272 | -0.002 | - |
|              |       | 150    | 2.290 | 0.016  | - |
|              |       | 160    | 2.268 | -0.006 | - |
|              |       | 170    | 2.278 | 0.004  | - |
|              |       | 180    | 2.266 | -0.008 | - |
|              |       | 190    | 2.277 | 0.003  | - |
|              |       | 200    | 2.290 | 0.016  | - |
|              |       | 210    | 2.284 | 0.010  | - |
|              |       | 220    | 2.286 | 0.012  | - |
|              |       | 230    | 2.271 | -0.003 | - |
|              |       | 240    | 2.275 | 0.001  | - |
|              |       | 250    | 2.287 | 0.013  | - |
|              |       | 260    | 2.271 | -0.003 | - |
|              |       | 270    | 2.284 | 0.010  | - |
|              |       | 280    | 2.278 | 0.004  | - |
|              |       | 290    | 2.271 | -0.003 | - |
|              |       | 300    | 2.272 | -0.002 | - |
|              |       | 310    | 2.286 | 0.012  | - |
|              |       | 320    | 2.279 | 0.005  | - |
|              |       | 330    | 2.264 | -0.010 | - |
|              |       | 340    | 2.270 | -0.004 | - |
| 350          | 2.274 | 0.000  | -     |        |   |
| 360          | 2.273 | -0.001 | -     |        |   |
| 370          | 2.292 | 0.018  | -     |        |   |
| 380          | 2.279 | 0.005  | -     |        |   |
| 390          | 2.270 | -0.004 | -     |        |   |
| 400          | 2.293 | 0.019  | -     |        |   |
| 410          | 2.292 | 0.018  | -     |        |   |
| 420          | 2.275 | 0.001  | -     |        |   |
| 430          | 2.275 | 0.001  | -     |        |   |
| 440          | 2.283 | 0.009  | -     |        |   |

|              |       |        |       |        |   |
|--------------|-------|--------|-------|--------|---|
|              |       | 450    | 2.298 | 0.024  | - |
|              |       | 460    | 2.270 | -0.004 | - |
|              |       | 470    | 2.281 | 0.007  | - |
|              |       | 480    | 2.285 | 0.011  | - |
|              |       | 490    | 2.272 | -0.002 | - |
|              |       | 500    | 2.266 | -0.008 | - |
|              |       | 510    | 2.274 | 0.000  | - |
|              |       | 520    | 2.289 | 0.015  | - |
|              |       | 530    | 2.290 | 0.016  | - |
|              |       | 540    | 2.304 | 0.030  | - |
|              |       | 550    | 2.285 | 0.011  | - |
|              |       | 560    | 2.290 | 0.016  | - |
|              |       | 570    | 2.264 | -0.010 | - |
|              |       | 580    | 2.287 | 0.013  | - |
|              |       | 590    | 2.279 | 0.005  | - |
|              |       | 600    | 2.277 | 0.003  | - |
| GFET<br>#C11 | 10    | -50    | 2.255 | 2.257  | - |
|              |       | -40    | 2.252 |        |   |
|              |       | -30    | 2.253 |        |   |
|              |       | -20    | 2.257 |        |   |
|              |       | -10    | 2.268 |        |   |
|              |       | 0      | 2.235 | -0.022 | - |
|              |       | 10     | 2.271 | 0.014  | - |
|              |       | 20     | 2.271 | 0.014  | - |
|              |       | 30     | 2.271 | 0.014  | - |
|              |       | 40     | 2.237 | -0.020 | - |
|              |       | 50     | 2.276 | 0.019  | - |
|              |       | 60     | 2.264 | 0.007  | - |
|              |       | 70     | 2.261 | 0.004  | - |
|              |       | 80     | 2.278 | 0.021  | - |
|              |       | 90     | 2.251 | -0.006 | - |
|              |       | 100    | 2.262 | 0.005  | - |
|              |       | 110    | 2.271 | 0.014  | - |
|              |       | 120    | 2.283 | 0.026  | - |
|              |       | 130    | 2.264 | 0.007  | - |
|              |       | 140    | 2.259 | 0.002  | - |
|              |       | 150    | 2.253 | -0.004 | - |
|              |       | 160    | 2.261 | 0.004  | - |
|              |       | 170    | 2.290 | 0.033  | - |
|              |       | 180    | 2.278 | 0.021  | - |
|              |       | 190    | 2.253 | -0.004 | - |
|              |       | 200    | 2.268 | 0.011  | - |
|              |       | 210    | 2.265 | 0.008  | - |
|              |       | 220    | 2.268 | 0.011  | - |
|              |       | 230    | 2.276 | 0.019  | - |
|              |       | 240    | 2.277 | 0.020  | - |
|              |       | 250    | 2.278 | 0.021  | - |
|              |       | 260    | 2.250 | -0.007 | - |
|              |       | 270    | 2.260 | 0.003  | - |
|              |       | 280    | 2.283 | 0.026  | - |
|              |       | 290    | 2.264 | 0.007  | - |
|              |       | 300    | 2.252 | -0.005 | - |
| 310          | 2.273 | 0.016  | -     |        |   |
| 320          | 2.250 | -0.007 | -     |        |   |
| 330          | 2.253 | -0.004 | -     |        |   |
| 340          | 2.264 | 0.007  | -     |        |   |
| 350          | 2.279 | 0.022  | -     |        |   |
| 360          | 2.275 | 0.018  | -     |        |   |
| 370          | 2.269 | 0.012  | -     |        |   |
| 380          | 2.276 | 0.019  | -     |        |   |
| 390          | 2.261 | 0.004  | -     |        |   |
| 400          | 2.256 | -0.001 | -     |        |   |

|              |       |       |       |        |   |
|--------------|-------|-------|-------|--------|---|
|              |       | 410   | 2.251 | -0.006 | - |
|              |       | 420   | 2.256 | -0.001 | - |
|              |       | 430   | 2.260 | 0.003  | - |
|              |       | 440   | 2.275 | 0.018  | - |
|              |       | 450   | 2.255 | -0.002 | - |
|              |       | 460   | 2.272 | 0.015  | - |
|              |       | 470   | 2.263 | 0.006  | - |
|              |       | 480   | 2.273 | 0.016  | - |
|              |       | 490   | 2.262 | 0.005  | - |
|              |       | 500   | 2.252 | -0.005 | - |
|              |       | 510   | 2.282 | 0.025  | - |
|              |       | 520   | 2.274 | 0.017  | - |
|              |       | 530   | 2.256 | -0.001 | - |
|              |       | 540   | 2.259 | 0.002  | - |
|              |       | 550   | 2.258 | 0.001  | - |
|              |       | 560   | 2.279 | 0.022  | - |
|              |       | 570   | 2.271 | 0.014  | - |
|              |       | 580   | 2.271 | 0.014  | - |
|              |       | 590   | 2.273 | 0.016  | - |
|              |       | 600   | 2.270 | 0.013  | - |
| GFET<br>#C12 | 25    | -50   | 2.272 | 2.275  | - |
|              |       | -40   | 2.277 |        |   |
|              |       | -30   | 2.280 |        |   |
|              |       | -20   | 2.273 |        |   |
|              |       | -10   | 2.274 |        |   |
|              |       | 0     | 2.273 | -0.002 | - |
|              |       | 10    | 2.276 | 0.001  | - |
|              |       | 20    | 2.257 | -0.018 | - |
|              |       | 30    | 2.280 | 0.005  | - |
|              |       | 40    | 2.287 | 0.012  | - |
|              |       | 50    | 2.273 | -0.002 | - |
|              |       | 60    | 2.280 | 0.005  | - |
|              |       | 70    | 2.281 | 0.006  | - |
|              |       | 80    | 2.287 | 0.012  | - |
|              |       | 90    | 2.290 | 0.015  | - |
|              |       | 100   | 2.290 | 0.015  | - |
|              |       | 110   | 2.267 | -0.008 | - |
|              |       | 120   | 2.280 | 0.005  | - |
|              |       | 130   | 2.298 | 0.023  | - |
|              |       | 140   | 2.294 | 0.019  | - |
|              |       | 150   | 2.266 | -0.009 | - |
|              |       | 160   | 2.278 | 0.003  | - |
|              |       | 170   | 2.292 | 0.017  | - |
|              |       | 180   | 2.276 | 0.001  | - |
|              |       | 190   | 2.273 | -0.002 | - |
|              |       | 200   | 2.285 | 0.010  | - |
|              |       | 210   | 2.289 | 0.014  | - |
|              |       | 220   | 2.267 | -0.008 | - |
|              |       | 230   | 2.275 | 0.000  | - |
|              |       | 240   | 2.293 | 0.018  | - |
|              |       | 250   | 2.280 | 0.005  | - |
|              |       | 260   | 2.271 | -0.004 | - |
|              |       | 270   | 2.282 | 0.007  | - |
|              |       | 280   | 2.294 | 0.019  | - |
|              |       | 290   | 2.291 | 0.016  | - |
|              |       | 300   | 2.301 | 0.026  | - |
| 310          | 2.294 | 0.019 | -     |        |   |
| 320          | 2.280 | 0.005 | -     |        |   |
| 330          | 2.292 | 0.017 | -     |        |   |
| 340          | 2.291 | 0.016 | -     |        |   |
| 350          | 2.297 | 0.022 | -     |        |   |
| 360          | 2.284 | 0.009 | -     |        |   |

|              |       |        |       |        |   |
|--------------|-------|--------|-------|--------|---|
|              |       | 370    | 2.295 | 0.020  | - |
|              |       | 380    | 2.303 | 0.028  | - |
|              |       | 390    | 2.309 | 0.034  | - |
|              |       | 400    | 2.298 | 0.023  | - |
|              |       | 410    | 2.293 | 0.018  | - |
|              |       | 420    | 2.292 | 0.017  | - |
|              |       | 430    | 2.305 | 0.030  | - |
|              |       | 440    | 2.288 | 0.013  | - |
|              |       | 450    | 2.282 | 0.007  | - |
|              |       | 460    | 2.276 | 0.001  | - |
|              |       | 470    | 2.287 | 0.012  | - |
|              |       | 480    | 2.291 | 0.016  | - |
|              |       | 490    | 2.288 | 0.013  | - |
|              |       | 500    | 2.293 | 0.018  | - |
|              |       | 510    | 2.308 | 0.033  | - |
|              |       | 520    | 2.295 | 0.020  | - |
|              |       | 530    | 2.292 | 0.017  | - |
|              |       | 540    | 2.304 | 0.029  | - |
|              |       | 550    | 2.303 | 0.028  | - |
|              |       | 560    | 2.308 | 0.033  | - |
|              |       | 570    | 2.299 | 0.024  | - |
|              |       | 580    | 2.302 | 0.027  | - |
|              |       | 590    | 2.303 | 0.028  | - |
|              |       | 600    | 2.295 | 0.020  | - |
| GFET<br>#C13 | 50    | -50    | 2.294 | 2.296  | - |
|              |       | -40    | 2.291 |        |   |
|              |       | -30    | 2.313 |        |   |
|              |       | -20    | 2.297 |        |   |
|              |       | -10    | 2.286 |        |   |
|              |       | 0      | 2.298 | 0.002  | - |
|              |       | 10     | 2.286 | -0.010 | - |
|              |       | 20     | 2.288 | -0.008 | - |
|              |       | 30     | 2.298 | 0.002  | - |
|              |       | 40     | 2.289 | -0.007 | - |
|              |       | 50     | 2.298 | 0.002  | - |
|              |       | 60     | 2.305 | 0.009  | - |
|              |       | 70     | 2.299 | 0.003  | - |
|              |       | 80     | 2.291 | -0.005 | - |
|              |       | 90     | 2.289 | -0.007 | - |
|              |       | 100    | 2.300 | 0.004  | - |
|              |       | 110    | 2.287 | -0.009 | - |
|              |       | 120    | 2.309 | 0.013  | - |
|              |       | 130    | 2.291 | -0.005 | - |
|              |       | 140    | 2.280 | -0.016 | - |
|              |       | 150    | 2.300 | 0.004  | - |
|              |       | 160    | 2.282 | -0.014 | - |
|              |       | 170    | 2.305 | 0.009  | - |
|              |       | 180    | 2.287 | -0.009 | - |
|              |       | 190    | 2.290 | -0.006 | - |
|              |       | 200    | 2.307 | 0.011  | - |
|              |       | 210    | 2.313 | 0.017  | - |
|              |       | 220    | 2.315 | 0.019  | - |
|              |       | 230    | 2.294 | -0.002 | - |
|              |       | 240    | 2.284 | -0.012 | - |
|              |       | 250    | 2.286 | -0.010 | - |
|              |       | 260    | 2.303 | 0.007  | - |
| 270          | 2.304 | 0.008  | -     |        |   |
| 280          | 2.280 | -0.016 | -     |        |   |
| 290          | 2.284 | -0.012 | -     |        |   |
| 300          | 2.295 | -0.001 | -     |        |   |
| 310          | 2.319 | 0.023  | -     |        |   |
| 320          | 2.289 | -0.007 | -     |        |   |



|              |       |        |       |        |   |
|--------------|-------|--------|-------|--------|---|
|              |       | 330    | 2.289 | -0.007 | - |
|              |       | 340    | 2.300 | 0.004  | - |
|              |       | 350    | 2.300 | 0.004  | - |
|              |       | 360    | 2.302 | 0.006  | - |
|              |       | 370    | 2.300 | 0.004  | - |
|              |       | 380    | 2.311 | 0.015  | - |
|              |       | 390    | 2.303 | 0.007  | - |
|              |       | 400    | 2.306 | 0.010  | - |
|              |       | 410    | 2.299 | 0.003  | - |
|              |       | 420    | 2.306 | 0.010  | - |
|              |       | 430    | 2.305 | 0.009  | - |
|              |       | 440    | 2.308 | 0.012  | - |
|              |       | 450    | 2.297 | 0.001  | - |
|              |       | 460    | 2.306 | 0.010  | - |
|              |       | 470    | 2.308 | 0.012  | - |
|              |       | 480    | 2.315 | 0.019  | - |
|              |       | 490    | 2.307 | 0.011  | - |
|              |       | 500    | 2.300 | 0.004  | - |
|              |       | 510    | 2.284 | -0.012 | - |
|              |       | 520    | 2.292 | -0.004 | - |
|              |       | 530    | 2.310 | 0.014  | - |
|              |       | 540    | 2.315 | 0.019  | - |
|              |       | 550    | 2.294 | -0.002 | - |
|              |       | 560    | 2.319 | 0.023  | - |
|              |       | 570    | 2.298 | 0.002  | - |
|              |       | 580    | 2.279 | -0.017 | - |
|              |       | 590    | 2.310 | 0.014  | - |
|              |       | 600    | 2.305 | 0.009  | - |
| GFET<br>#C14 | 100   | -50    | 2.259 | 2.271  | - |
|              |       | -40    | 2.270 |        |   |
|              |       | -30    | 2.283 |        |   |
|              |       | -20    | 2.270 |        |   |
|              |       | -10    | 2.275 |        |   |
|              |       | 0      | 2.259 | -0.012 | - |
|              |       | 10     | 2.266 | -0.005 | - |
|              |       | 20     | 2.256 | -0.015 | - |
|              |       | 30     | 2.266 | -0.005 | - |
|              |       | 40     | 2.267 | -0.004 | - |
|              |       | 50     | 2.269 | -0.002 | - |
|              |       | 60     | 2.268 | -0.003 | - |
|              |       | 70     | 2.265 | -0.006 | - |
|              |       | 80     | 2.271 | 0.000  | - |
|              |       | 90     | 2.247 | -0.024 | - |
|              |       | 100    | 2.256 | -0.015 | - |
|              |       | 110    | 2.257 | -0.014 | - |
|              |       | 120    | 2.284 | 0.013  | - |
|              |       | 130    | 2.255 | -0.016 | - |
|              |       | 140    | 2.283 | 0.012  | - |
|              |       | 150    | 2.272 | 0.001  | - |
|              |       | 160    | 2.279 | 0.008  | - |
|              |       | 170    | 2.277 | 0.006  | - |
|              |       | 180    | 2.287 | 0.016  | - |
|              |       | 190    | 2.275 | 0.004  | - |
|              |       | 200    | 2.288 | 0.017  | - |
|              |       | 210    | 2.270 | -0.001 | - |
|              |       | 220    | 2.290 | 0.019  | - |
| 230          | 2.275 | 0.004  | -     |        |   |
| 240          | 2.271 | 0.000  | -     |        |   |
| 250          | 2.267 | -0.004 | -     |        |   |
| 260          | 2.286 | 0.015  | -     |        |   |
| 270          | 2.274 | 0.003  | -     |        |   |
| 280          | 2.284 | 0.013  | -     |        |   |

|  |  |     |       |       |   |
|--|--|-----|-------|-------|---|
|  |  | 290 | 2.279 | 0.008 | – |
|  |  | 300 | 2.294 | 0.023 | – |
|  |  | 310 | 2.277 | 0.006 | – |
|  |  | 320 | 2.295 | 0.024 | – |
|  |  | 330 | 2.276 | 0.005 | – |
|  |  | 340 | 2.274 | 0.003 | – |
|  |  | 350 | 2.291 | 0.020 | – |
|  |  | 360 | 2.283 | 0.012 | – |
|  |  | 370 | 2.292 | 0.021 | – |
|  |  | 380 | 2.276 | 0.005 | – |
|  |  | 390 | 2.293 | 0.022 | – |
|  |  | 400 | 2.289 | 0.018 | – |
|  |  | 410 | 2.300 | 0.029 | – |
|  |  | 420 | 2.291 | 0.020 | – |
|  |  | 430 | 2.294 | 0.023 | – |
|  |  | 440 | 2.287 | 0.016 | – |
|  |  | 450 | 2.293 | 0.022 | – |
|  |  | 460 | 2.271 | 0.000 | – |
|  |  | 470 | 2.305 | 0.034 | – |
|  |  | 480 | 2.291 | 0.020 | – |
|  |  | 490 | 2.289 | 0.018 | – |
|  |  | 500 | 2.279 | 0.008 | – |
|  |  | 510 | 2.290 | 0.019 | – |
|  |  | 520 | 2.306 | 0.035 | – |
|  |  | 530 | 2.294 | 0.023 | – |
|  |  | 540 | 2.289 | 0.018 | – |
|  |  | 550 | 2.308 | 0.037 | – |
|  |  | 560 | 2.299 | 0.028 | – |
|  |  | 570 | 2.293 | 0.022 | – |
|  |  | 580 | 2.301 | 0.030 | – |
|  |  | 590 | 2.284 | 0.013 | – |
|  |  | 600 | 2.310 | 0.039 | – |

**Table S6.** Responses of AFP antibody-CEA cross-reaction.

| Device number | CEA concentration, $c^{(CEA)}$ (nM) | Time, $t$ (s) | Experimental results |                                                       | Fitting results |
|---------------|-------------------------------------|---------------|----------------------|-------------------------------------------------------|-----------------|
|               |                                     |               | $I_d$ ( $\mu$ A)     | $\Delta I_d = I_d - \overline{I_d}(t < 0)$ ( $\mu$ A) | N/A             |
| GFET #C15     | 1                                   | -50           | 2.269                | 2.262                                                 | -               |
|               |                                     | -40           | 2.248                |                                                       |                 |
|               |                                     | -30           | 2.269                |                                                       |                 |
|               |                                     | -20           | 2.262                |                                                       |                 |
|               |                                     | -10           | 2.261                |                                                       |                 |
|               |                                     | 0             | 2.254                | -0.008                                                | -               |
|               |                                     | 10            | 2.244                | -0.018                                                | -               |
|               |                                     | 20            | 2.270                | 0.008                                                 | -               |
|               |                                     | 30            | 2.243                | -0.019                                                | -               |
|               |                                     | 40            | 2.275                | 0.013                                                 | -               |
|               |                                     | 50            | 2.259                | -0.003                                                | -               |
|               |                                     | 60            | 2.262                | 0.000                                                 | -               |
|               |                                     | 70            | 2.241                | -0.021                                                | -               |
|               |                                     | 80            | 2.252                | -0.010                                                | -               |
|               |                                     | 90            | 2.254                | -0.008                                                | -               |
|               |                                     | 100           | 2.245                | -0.017                                                | -               |
|               |                                     | 110           | 2.249                | -0.013                                                | -               |
|               |                                     | 120           | 2.239                | -0.023                                                | -               |
|               |                                     | 130           | 2.253                | -0.009                                                | -               |
|               |                                     | 140           | 2.270                | 0.008                                                 | -               |
|               |                                     | 150           | 2.262                | 0.000                                                 | -               |
|               |                                     | 160           | 2.253                | -0.009                                                | -               |
|               |                                     | 170           | 2.270                | 0.008                                                 | -               |
|               |                                     | 180           | 2.262                | 0.000                                                 | -               |
|               |                                     | 190           | 2.252                | -0.010                                                | -               |
|               |                                     | 200           | 2.258                | -0.004                                                | -               |
|               |                                     | 210           | 2.265                | 0.003                                                 | -               |
|               |                                     | 220           | 2.263                | 0.001                                                 | -               |
|               |                                     | 230           | 2.257                | -0.005                                                | -               |
|               |                                     | 240           | 2.264                | 0.002                                                 | -               |
|               |                                     | 250           | 2.267                | 0.005                                                 | -               |
|               |                                     | 260           | 2.270                | 0.008                                                 | -               |
|               |                                     | 270           | 2.277                | 0.015                                                 | -               |
|               |                                     | 280           | 2.268                | 0.006                                                 | -               |
|               |                                     | 290           | 2.262                | 0.000                                                 | -               |
|               |                                     | 300           | 2.263                | 0.001                                                 | -               |
|               |                                     | 310           | 2.257                | -0.005                                                | -               |
|               |                                     | 320           | 2.264                | 0.002                                                 | -               |
|               |                                     | 330           | 2.256                | -0.006                                                | -               |
|               |                                     | 340           | 2.259                | -0.003                                                | -               |
|               |                                     | 350           | 2.258                | -0.004                                                | -               |
|               |                                     | 360           | 2.265                | 0.003                                                 | -               |
|               |                                     | 370           | 2.270                | 0.008                                                 | -               |
|               |                                     | 380           | 2.270                | 0.008                                                 | -               |
|               |                                     | 390           | 2.264                | 0.002                                                 | -               |
|               |                                     | 400           | 2.281                | 0.019                                                 | -               |
|               |                                     | 410           | 2.263                | 0.001                                                 | -               |
|               |                                     | 420           | 2.253                | -0.009                                                | -               |
|               |                                     | 430           | 2.252                | -0.010                                                | -               |
|               |                                     | 440           | 2.258                | -0.004                                                | -               |
|               |                                     | 450           | 2.256                | -0.006                                                | -               |
|               |                                     | 460           | 2.257                | -0.005                                                | -               |
| 470           | 2.280                               | 0.018         | -                    |                                                       |                 |
| 480           | 2.260                               | -0.002        | -                    |                                                       |                 |
| 490           | 2.264                               | 0.002         | -                    |                                                       |                 |
| 500           | 2.253                               | -0.009        | -                    |                                                       |                 |
| 510           | 2.246                               | -0.016        | -                    |                                                       |                 |
| 520           | 2.263                               | 0.001         | -                    |                                                       |                 |

|              |       |        |       |        |   |
|--------------|-------|--------|-------|--------|---|
|              |       | 530    | 2.234 | -0.028 | - |
|              |       | 540    | 2.246 | -0.016 | - |
|              |       | 550    | 2.252 | -0.010 | - |
|              |       | 560    | 2.267 | 0.005  | - |
|              |       | 570    | 2.255 | -0.007 | - |
|              |       | 580    | 2.268 | 0.006  | - |
|              |       | 590    | 2.244 | -0.018 | - |
|              |       | 600    | 2.248 | -0.014 | - |
| GFET<br>#C16 | 2.5   | -50    | 2.302 | 2.290  | - |
|              |       | -40    | 2.296 |        |   |
|              |       | -30    | 2.286 |        |   |
|              |       | -20    | 2.296 |        |   |
|              |       | -10    | 2.271 |        |   |
|              |       | 0      | 2.270 | -0.020 | - |
|              |       | 10     | 2.272 | -0.018 | - |
|              |       | 20     | 2.288 | -0.002 | - |
|              |       | 30     | 2.305 | 0.015  | - |
|              |       | 40     | 2.305 | 0.015  | - |
|              |       | 50     | 2.274 | -0.016 | - |
|              |       | 60     | 2.272 | -0.018 | - |
|              |       | 70     | 2.291 | 0.001  | - |
|              |       | 80     | 2.266 | -0.024 | - |
|              |       | 90     | 2.287 | -0.003 | - |
|              |       | 100    | 2.270 | -0.020 | - |
|              |       | 110    | 2.262 | -0.028 | - |
|              |       | 120    | 2.279 | -0.011 | - |
|              |       | 130    | 2.313 | 0.023  | - |
|              |       | 140    | 2.282 | -0.008 | - |
|              |       | 150    | 2.294 | 0.004  | - |
|              |       | 160    | 2.284 | -0.006 | - |
|              |       | 170    | 2.301 | 0.011  | - |
|              |       | 180    | 2.295 | 0.005  | - |
|              |       | 190    | 2.286 | -0.004 | - |
|              |       | 200    | 2.279 | -0.011 | - |
|              |       | 210    | 2.279 | -0.011 | - |
|              |       | 220    | 2.300 | 0.010  | - |
|              |       | 230    | 2.285 | -0.005 | - |
|              |       | 240    | 2.283 | -0.007 | - |
|              |       | 250    | 2.287 | -0.003 | - |
|              |       | 260    | 2.305 | 0.015  | - |
|              |       | 270    | 2.289 | -0.001 | - |
|              |       | 280    | 2.295 | 0.005  | - |
|              |       | 290    | 2.300 | 0.010  | - |
|              |       | 300    | 2.299 | 0.009  | - |
|              |       | 310    | 2.294 | 0.004  | - |
|              |       | 320    | 2.284 | -0.006 | - |
|              |       | 330    | 2.300 | 0.010  | - |
|              |       | 340    | 2.293 | 0.003  | - |
|              |       | 350    | 2.301 | 0.011  | - |
|              |       | 360    | 2.288 | -0.002 | - |
|              |       | 370    | 2.290 | 0.000  | - |
|              |       | 380    | 2.280 | -0.010 | - |
|              |       | 390    | 2.274 | -0.016 | - |
|              |       | 400    | 2.301 | 0.011  | - |
|              |       | 410    | 2.288 | -0.002 | - |
|              |       | 420    | 2.282 | -0.008 | - |
| 430          | 2.278 | -0.012 | -     |        |   |
| 440          | 2.286 | -0.004 | -     |        |   |
| 450          | 2.285 | -0.005 | -     |        |   |
| 460          | 2.286 | -0.004 | -     |        |   |
| 470          | 2.300 | 0.010  | -     |        |   |
| 480          | 2.296 | 0.006  | -     |        |   |

|              |       |        |       |        |   |
|--------------|-------|--------|-------|--------|---|
|              |       | 490    | 2.290 | 0.000  | - |
|              |       | 500    | 2.286 | -0.004 | - |
|              |       | 510    | 2.284 | -0.006 | - |
|              |       | 520    | 2.293 | 0.003  | - |
|              |       | 530    | 2.269 | -0.021 | - |
|              |       | 540    | 2.290 | 0.000  | - |
|              |       | 550    | 2.290 | 0.000  | - |
|              |       | 560    | 2.280 | -0.010 | - |
|              |       | 570    | 2.254 | -0.036 | - |
|              |       | 580    | 2.305 | 0.015  | - |
|              |       | 590    | 2.294 | 0.004  | - |
|              |       | 600    | 2.298 | 0.008  | - |
| GFET<br>#C17 | 5     | -50    | 2.280 | 2.268  | - |
|              |       | -40    | 2.259 |        |   |
|              |       | -30    | 2.263 |        |   |
|              |       | -20    | 2.277 |        |   |
|              |       | -10    | 2.259 |        |   |
|              |       | 0      | 2.263 | -0.005 | - |
|              |       | 10     | 2.276 | 0.008  | - |
|              |       | 20     | 2.267 | -0.001 | - |
|              |       | 30     | 2.273 | 0.005  | - |
|              |       | 40     | 2.264 | -0.004 | - |
|              |       | 50     | 2.279 | 0.011  | - |
|              |       | 60     | 2.284 | 0.016  | - |
|              |       | 70     | 2.275 | 0.007  | - |
|              |       | 80     | 2.277 | 0.009  | - |
|              |       | 90     | 2.277 | 0.009  | - |
|              |       | 100    | 2.269 | 0.001  | - |
|              |       | 110    | 2.265 | -0.003 | - |
|              |       | 120    | 2.269 | 0.001  | - |
|              |       | 130    | 2.276 | 0.008  | - |
|              |       | 140    | 2.252 | -0.016 | - |
|              |       | 150    | 2.254 | -0.014 | - |
|              |       | 160    | 2.282 | 0.014  | - |
|              |       | 170    | 2.270 | 0.002  | - |
|              |       | 180    | 2.291 | 0.023  | - |
|              |       | 190    | 2.260 | -0.008 | - |
|              |       | 200    | 2.288 | 0.020  | - |
|              |       | 210    | 2.282 | 0.014  | - |
|              |       | 220    | 2.283 | 0.015  | - |
|              |       | 230    | 2.263 | -0.005 | - |
|              |       | 240    | 2.266 | -0.002 | - |
|              |       | 250    | 2.295 | 0.027  | - |
|              |       | 260    | 2.270 | 0.002  | - |
|              |       | 270    | 2.280 | 0.012  | - |
|              |       | 280    | 2.266 | -0.002 | - |
|              |       | 290    | 2.268 | 0.000  | - |
|              |       | 300    | 2.261 | -0.007 | - |
|              |       | 310    | 2.276 | 0.008  | - |
|              |       | 320    | 2.298 | 0.030  | - |
|              |       | 330    | 2.290 | 0.022  | - |
|              |       | 340    | 2.284 | 0.016  | - |
|              |       | 350    | 2.280 | 0.012  | - |
|              |       | 360    | 2.267 | -0.001 | - |
|              |       | 370    | 2.282 | 0.014  | - |
|              |       | 380    | 2.261 | -0.007 | - |
| 390          | 2.261 | -0.007 | -     |        |   |
| 400          | 2.271 | 0.003  | -     |        |   |
| 410          | 2.272 | 0.004  | -     |        |   |
| 420          | 2.286 | 0.018  | -     |        |   |
| 430          | 2.264 | -0.004 | -     |        |   |
| 440          | 2.283 | 0.015  | -     |        |   |

|              |       |        |       |        |   |
|--------------|-------|--------|-------|--------|---|
|              |       | 450    | 2.277 | 0.009  | - |
|              |       | 460    | 2.261 | -0.007 | - |
|              |       | 470    | 2.296 | 0.028  | - |
|              |       | 480    | 2.257 | -0.011 | - |
|              |       | 490    | 2.289 | 0.021  | - |
|              |       | 500    | 2.263 | -0.005 | - |
|              |       | 510    | 2.286 | 0.018  | - |
|              |       | 520    | 2.286 | 0.018  | - |
|              |       | 530    | 2.274 | 0.006  | - |
|              |       | 540    | 2.308 | 0.040  | - |
|              |       | 550    | 2.286 | 0.018  | - |
|              |       | 560    | 2.280 | 0.012  | - |
|              |       | 570    | 2.263 | -0.005 | - |
|              |       | 580    | 2.283 | 0.015  | - |
|              |       | 590    | 2.260 | -0.008 | - |
|              |       | 600    | 2.296 | 0.028  | - |
| GFET<br>#C18 | 10    | -50    | 2.289 | 2.293  | - |
|              |       | -40    | 2.298 |        |   |
|              |       | -30    | 2.285 |        |   |
|              |       | -20    | 2.295 |        |   |
|              |       | -10    | 2.296 |        |   |
|              |       | 0      | 2.282 | -0.011 | - |
|              |       | 10     | 2.297 | 0.004  | - |
|              |       | 20     | 2.301 | 0.008  | - |
|              |       | 30     | 2.309 | 0.016  | - |
|              |       | 40     | 2.289 | -0.004 | - |
|              |       | 50     | 2.289 | -0.004 | - |
|              |       | 60     | 2.294 | 0.001  | - |
|              |       | 70     | 2.271 | -0.022 | - |
|              |       | 80     | 2.289 | -0.004 | - |
|              |       | 90     | 2.294 | 0.001  | - |
|              |       | 100    | 2.294 | 0.001  | - |
|              |       | 110    | 2.297 | 0.004  | - |
|              |       | 120    | 2.288 | -0.005 | - |
|              |       | 130    | 2.293 | 0.000  | - |
|              |       | 140    | 2.288 | -0.005 | - |
|              |       | 150    | 2.292 | -0.001 | - |
|              |       | 160    | 2.282 | -0.011 | - |
|              |       | 170    | 2.287 | -0.006 | - |
|              |       | 180    | 2.289 | -0.004 | - |
|              |       | 190    | 2.283 | -0.010 | - |
|              |       | 200    | 2.290 | -0.003 | - |
|              |       | 210    | 2.319 | 0.026  | - |
|              |       | 220    | 2.292 | -0.001 | - |
|              |       | 230    | 2.294 | 0.001  | - |
|              |       | 240    | 2.303 | 0.010  | - |
|              |       | 250    | 2.289 | -0.004 | - |
|              |       | 260    | 2.295 | 0.002  | - |
|              |       | 270    | 2.297 | 0.004  | - |
|              |       | 280    | 2.291 | -0.002 | - |
|              |       | 290    | 2.280 | -0.013 | - |
|              |       | 300    | 2.274 | -0.019 | - |
| 310          | 2.283 | -0.010 | -     |        |   |
| 320          | 2.293 | 0.000  | -     |        |   |
| 330          | 2.286 | -0.007 | -     |        |   |
| 340          | 2.275 | -0.018 | -     |        |   |
| 350          | 2.271 | -0.022 | -     |        |   |
| 360          | 2.283 | -0.010 | -     |        |   |
| 370          | 2.305 | 0.012  | -     |        |   |
| 380          | 2.306 | 0.013  | -     |        |   |
| 390          | 2.286 | -0.007 | -     |        |   |
| 400          | 2.303 | 0.010  | -     |        |   |

|              |       |       |       |        |   |
|--------------|-------|-------|-------|--------|---|
|              |       | 410   | 2.295 | 0.002  | - |
|              |       | 420   | 2.296 | 0.003  | - |
|              |       | 430   | 2.290 | -0.003 | - |
|              |       | 440   | 2.294 | 0.001  | - |
|              |       | 450   | 2.299 | 0.006  | - |
|              |       | 460   | 2.293 | 0.000  | - |
|              |       | 470   | 2.298 | 0.005  | - |
|              |       | 480   | 2.300 | 0.007  | - |
|              |       | 490   | 2.287 | -0.006 | - |
|              |       | 500   | 2.295 | 0.002  | - |
|              |       | 510   | 2.293 | 0.000  | - |
|              |       | 520   | 2.313 | 0.020  | - |
|              |       | 530   | 2.284 | -0.009 | - |
|              |       | 540   | 2.299 | 0.006  | - |
|              |       | 550   | 2.304 | 0.011  | - |
|              |       | 560   | 2.289 | -0.004 | - |
|              |       | 570   | 2.294 | 0.001  | - |
|              |       | 580   | 2.301 | 0.008  | - |
|              |       | 590   | 2.301 | 0.008  | - |
|              |       | 600   | 2.295 | 0.002  | - |
| GFET<br>#C19 | 25    | -50   | 2.293 | 2.295  | - |
|              |       | -40   | 2.283 |        |   |
|              |       | -30   | 2.294 |        |   |
|              |       | -20   | 2.312 |        |   |
|              |       | -10   | 2.292 |        |   |
|              |       | 0     | 2.307 | 0.012  | - |
|              |       | 10    | 2.299 | 0.004  | - |
|              |       | 20    | 2.292 | -0.003 | - |
|              |       | 30    | 2.308 | 0.013  | - |
|              |       | 40    | 2.308 | 0.013  | - |
|              |       | 50    | 2.290 | -0.005 | - |
|              |       | 60    | 2.302 | 0.007  | - |
|              |       | 70    | 2.303 | 0.008  | - |
|              |       | 80    | 2.294 | -0.001 | - |
|              |       | 90    | 2.300 | 0.005  | - |
|              |       | 100   | 2.303 | 0.008  | - |
|              |       | 110   | 2.306 | 0.011  | - |
|              |       | 120   | 2.297 | 0.002  | - |
|              |       | 130   | 2.296 | 0.001  | - |
|              |       | 140   | 2.291 | -0.004 | - |
|              |       | 150   | 2.293 | -0.002 | - |
|              |       | 160   | 2.294 | -0.001 | - |
|              |       | 170   | 2.310 | 0.015  | - |
|              |       | 180   | 2.294 | -0.001 | - |
|              |       | 190   | 2.310 | 0.015  | - |
|              |       | 200   | 2.310 | 0.015  | - |
|              |       | 210   | 2.296 | 0.001  | - |
|              |       | 220   | 2.293 | -0.002 | - |
|              |       | 230   | 2.306 | 0.011  | - |
|              |       | 240   | 2.309 | 0.014  | - |
|              |       | 250   | 2.299 | 0.004  | - |
|              |       | 260   | 2.329 | 0.034  | - |
|              |       | 270   | 2.298 | 0.003  | - |
|              |       | 280   | 2.295 | 0.000  | - |
|              |       | 290   | 2.288 | -0.007 | - |
|              |       | 300   | 2.303 | 0.008  | - |
| 310          | 2.295 | 0.000 | -     |        |   |
| 320          | 2.321 | 0.026 | -     |        |   |
| 330          | 2.321 | 0.026 | -     |        |   |
| 340          | 2.340 | 0.045 | -     |        |   |
| 350          | 2.304 | 0.009 | -     |        |   |
| 360          | 2.316 | 0.021 | -     |        |   |

|              |       |        |       |        |   |
|--------------|-------|--------|-------|--------|---|
|              |       | 370    | 2.325 | 0.030  | - |
|              |       | 380    | 2.313 | 0.018  | - |
|              |       | 390    | 2.281 | -0.014 | - |
|              |       | 400    | 2.310 | 0.015  | - |
|              |       | 410    | 2.308 | 0.013  | - |
|              |       | 420    | 2.319 | 0.024  | - |
|              |       | 430    | 2.303 | 0.008  | - |
|              |       | 440    | 2.316 | 0.021  | - |
|              |       | 450    | 2.308 | 0.013  | - |
|              |       | 460    | 2.301 | 0.006  | - |
|              |       | 470    | 2.312 | 0.017  | - |
|              |       | 480    | 2.314 | 0.019  | - |
|              |       | 490    | 2.306 | 0.011  | - |
|              |       | 500    | 2.309 | 0.014  | - |
|              |       | 510    | 2.317 | 0.022  | - |
|              |       | 520    | 2.309 | 0.014  | - |
|              |       | 530    | 2.312 | 0.017  | - |
|              |       | 540    | 2.294 | -0.001 | - |
|              |       | 550    | 2.305 | 0.010  | - |
|              |       | 560    | 2.318 | 0.023  | - |
|              |       | 570    | 2.306 | 0.011  | - |
|              |       | 580    | 2.316 | 0.021  | - |
|              |       | 590    | 2.322 | 0.027  | - |
|              |       | 600    | 2.303 | 0.008  | - |
| GFET<br>#C20 | 50    | -50    | 2.275 | 2.276  | - |
|              |       | -40    | 2.281 |        |   |
|              |       | -30    | 2.275 |        |   |
|              |       | -20    | 2.281 |        |   |
|              |       | -10    | 2.269 |        |   |
|              |       | 0      | 2.272 | -0.004 | - |
|              |       | 10     | 2.276 | 0.000  | - |
|              |       | 20     | 2.273 | -0.003 | - |
|              |       | 30     | 2.268 | -0.008 | - |
|              |       | 40     | 2.290 | 0.014  | - |
|              |       | 50     | 2.256 | -0.020 | - |
|              |       | 60     | 2.276 | 0.000  | - |
|              |       | 70     | 2.269 | -0.007 | - |
|              |       | 80     | 2.284 | 0.008  | - |
|              |       | 90     | 2.286 | 0.010  | - |
|              |       | 100    | 2.277 | 0.001  | - |
|              |       | 110    | 2.265 | -0.011 | - |
|              |       | 120    | 2.283 | 0.007  | - |
|              |       | 130    | 2.288 | 0.012  | - |
|              |       | 140    | 2.273 | -0.003 | - |
|              |       | 150    | 2.279 | 0.003  | - |
|              |       | 160    | 2.262 | -0.014 | - |
|              |       | 170    | 2.277 | 0.001  | - |
|              |       | 180    | 2.274 | -0.002 | - |
|              |       | 190    | 2.267 | -0.009 | - |
|              |       | 200    | 2.284 | 0.008  | - |
|              |       | 210    | 2.291 | 0.015  | - |
|              |       | 220    | 2.282 | 0.006  | - |
|              |       | 230    | 2.272 | -0.004 | - |
|              |       | 240    | 2.287 | 0.011  | - |
|              |       | 250    | 2.276 | 0.000  | - |
|              |       | 260    | 2.285 | 0.009  | - |
| 270          | 2.277 | 0.001  | -     |        |   |
| 280          | 2.274 | -0.002 | -     |        |   |
| 290          | 2.294 | 0.018  | -     |        |   |
| 300          | 2.299 | 0.023  | -     |        |   |
| 310          | 2.276 | 0.000  | -     |        |   |
| 320          | 2.272 | -0.004 | -     |        |   |



|              |       |        |       |        |   |
|--------------|-------|--------|-------|--------|---|
|              |       | 330    | 2.278 | 0.002  | - |
|              |       | 340    | 2.290 | 0.014  | - |
|              |       | 350    | 2.282 | 0.006  | - |
|              |       | 360    | 2.291 | 0.015  | - |
|              |       | 370    | 2.270 | -0.006 | - |
|              |       | 380    | 2.271 | -0.005 | - |
|              |       | 390    | 2.291 | 0.015  | - |
|              |       | 400    | 2.296 | 0.020  | - |
|              |       | 410    | 2.287 | 0.011  | - |
|              |       | 420    | 2.286 | 0.010  | - |
|              |       | 430    | 2.272 | -0.004 | - |
|              |       | 440    | 2.298 | 0.022  | - |
|              |       | 450    | 2.299 | 0.023  | - |
|              |       | 460    | 2.303 | 0.027  | - |
|              |       | 470    | 2.282 | 0.006  | - |
|              |       | 480    | 2.282 | 0.006  | - |
|              |       | 490    | 2.272 | -0.004 | - |
|              |       | 500    | 2.307 | 0.031  | - |
|              |       | 510    | 2.287 | 0.011  | - |
|              |       | 520    | 2.288 | 0.012  | - |
|              |       | 530    | 2.285 | 0.009  | - |
|              |       | 540    | 2.302 | 0.026  | - |
|              |       | 550    | 2.281 | 0.005  | - |
|              |       | 560    | 2.291 | 0.015  | - |
|              |       | 570    | 2.285 | 0.009  | - |
|              |       | 580    | 2.275 | -0.001 | - |
|              |       | 590    | 2.290 | 0.014  | - |
|              |       | 600    | 2.276 | 0.000  | - |
| GFET<br>#C21 | 100   | -50    | 2.285 | 2.292  | - |
|              |       | -40    | 2.294 |        |   |
|              |       | -30    | 2.299 |        |   |
|              |       | -20    | 2.297 |        |   |
|              |       | -10    | 2.285 |        |   |
|              |       | 0      | 2.292 | 0.000  | - |
|              |       | 10     | 2.308 | 0.016  | - |
|              |       | 20     | 2.315 | 0.023  | - |
|              |       | 30     | 2.291 | -0.001 | - |
|              |       | 40     | 2.295 | 0.003  | - |
|              |       | 50     | 2.301 | 0.009  | - |
|              |       | 60     | 2.290 | -0.002 | - |
|              |       | 70     | 2.305 | 0.013  | - |
|              |       | 80     | 2.291 | -0.001 | - |
|              |       | 90     | 2.297 | 0.005  | - |
|              |       | 100    | 2.291 | -0.001 | - |
|              |       | 110    | 2.295 | 0.003  | - |
|              |       | 120    | 2.321 | 0.029  | - |
|              |       | 130    | 2.308 | 0.016  | - |
|              |       | 140    | 2.313 | 0.021  | - |
|              |       | 150    | 2.295 | 0.003  | - |
|              |       | 160    | 2.290 | -0.002 | - |
|              |       | 170    | 2.302 | 0.010  | - |
|              |       | 180    | 2.300 | 0.008  | - |
|              |       | 190    | 2.296 | 0.004  | - |
|              |       | 200    | 2.299 | 0.007  | - |
|              |       | 210    | 2.306 | 0.014  | - |
|              |       | 220    | 2.311 | 0.019  | - |
| 230          | 2.313 | 0.021  | -     |        |   |
| 240          | 2.309 | 0.017  | -     |        |   |
| 250          | 2.288 | -0.004 | -     |        |   |
| 260          | 2.291 | -0.001 | -     |        |   |
| 270          | 2.323 | 0.031  | -     |        |   |
| 280          | 2.292 | 0.000  | -     |        |   |

|  |  |     |       |        |   |
|--|--|-----|-------|--------|---|
|  |  | 290 | 2.289 | -0.003 | - |
|  |  | 300 | 2.306 | 0.014  | - |
|  |  | 310 | 2.303 | 0.011  | - |
|  |  | 320 | 2.305 | 0.013  | - |
|  |  | 330 | 2.318 | 0.026  | - |
|  |  | 340 | 2.286 | -0.006 | - |
|  |  | 350 | 2.302 | 0.010  | - |
|  |  | 360 | 2.309 | 0.017  | - |
|  |  | 370 | 2.308 | 0.016  | - |
|  |  | 380 | 2.292 | 0.000  | - |
|  |  | 390 | 2.320 | 0.028  | - |
|  |  | 400 | 2.321 | 0.029  | - |
|  |  | 410 | 2.298 | 0.006  | - |
|  |  | 420 | 2.298 | 0.006  | - |
|  |  | 430 | 2.294 | 0.002  | - |
|  |  | 440 | 2.314 | 0.022  | - |
|  |  | 450 | 2.313 | 0.021  | - |
|  |  | 460 | 2.289 | -0.003 | - |
|  |  | 470 | 2.303 | 0.011  | - |
|  |  | 480 | 2.306 | 0.014  | - |
|  |  | 490 | 2.295 | 0.003  | - |
|  |  | 500 | 2.318 | 0.026  | - |
|  |  | 510 | 2.308 | 0.016  | - |
|  |  | 520 | 2.304 | 0.012  | - |
|  |  | 530 | 2.302 | 0.010  | - |
|  |  | 540 | 2.304 | 0.012  | - |
|  |  | 550 | 2.322 | 0.030  | - |
|  |  | 560 | 2.302 | 0.010  | - |
|  |  | 570 | 2.310 | 0.018  | - |
|  |  | 580 | 2.300 | 0.008  | - |
|  |  | 590 | 2.334 | 0.042  | - |
|  |  | 600 | 2.297 | 0.005  | - |

**Table S7.** Responses of AFP antibody-PTH cross-reaction.

| Device number | PTH concentration, $c^{(PTH)}$ (nM) | Time, $t$ (s) | Experimental results |                                                       | Fitting results |
|---------------|-------------------------------------|---------------|----------------------|-------------------------------------------------------|-----------------|
|               |                                     |               | $I_d$ ( $\mu$ A)     | $\Delta I_d = I_d - \overline{I_d}(t < 0)$ ( $\mu$ A) | N/A             |
| GFET #C22     | 1                                   | -50           | 2.278                | 2.280                                                 | -               |
|               |                                     | -40           | 2.288                |                                                       |                 |
|               |                                     | -30           | 2.297                |                                                       |                 |
|               |                                     | -20           | 2.261                |                                                       |                 |
|               |                                     | -10           | 2.276                |                                                       |                 |
|               |                                     | 0             | 2.242                | -0.038                                                | -               |
|               |                                     | 10            | 2.284                | 0.004                                                 | -               |
|               |                                     | 20            | 2.276                | -0.004                                                | -               |
|               |                                     | 30            | 2.259                | -0.021                                                | -               |
|               |                                     | 40            | 2.260                | -0.020                                                | -               |
|               |                                     | 50            | 2.258                | -0.022                                                | -               |
|               |                                     | 60            | 2.281                | 0.001                                                 | -               |
|               |                                     | 70            | 2.271                | -0.009                                                | -               |
|               |                                     | 80            | 2.270                | -0.010                                                | -               |
|               |                                     | 90            | 2.279                | -0.001                                                | -               |
|               |                                     | 100           | 2.280                | 0.000                                                 | -               |
|               |                                     | 110           | 2.282                | 0.002                                                 | -               |
|               |                                     | 120           | 2.258                | -0.022                                                | -               |
|               |                                     | 130           | 2.263                | -0.017                                                | -               |
|               |                                     | 140           | 2.258                | -0.022                                                | -               |
|               |                                     | 150           | 2.276                | -0.004                                                | -               |
|               |                                     | 160           | 2.287                | 0.007                                                 | -               |
|               |                                     | 170           | 2.287                | 0.007                                                 | -               |
|               |                                     | 180           | 2.283                | 0.003                                                 | -               |
|               |                                     | 190           | 2.295                | 0.015                                                 | -               |
|               |                                     | 200           | 2.284                | 0.004                                                 | -               |
|               |                                     | 210           | 2.269                | -0.011                                                | -               |
|               |                                     | 220           | 2.265                | -0.015                                                | -               |
|               |                                     | 230           | 2.254                | -0.026                                                | -               |
|               |                                     | 240           | 2.276                | -0.004                                                | -               |
|               |                                     | 250           | 2.258                | -0.022                                                | -               |
|               |                                     | 260           | 2.257                | -0.023                                                | -               |
|               |                                     | 270           | 2.266                | -0.014                                                | -               |
|               |                                     | 280           | 2.267                | -0.013                                                | -               |
|               |                                     | 290           | 2.269                | -0.011                                                | -               |
|               |                                     | 300           | 2.274                | -0.006                                                | -               |
|               |                                     | 310           | 2.278                | -0.002                                                | -               |
|               |                                     | 320           | 2.269                | -0.011                                                | -               |
|               |                                     | 330           | 2.274                | -0.006                                                | -               |
|               |                                     | 340           | 2.270                | -0.010                                                | -               |
|               |                                     | 350           | 2.280                | 0.000                                                 | -               |
|               |                                     | 360           | 2.262                | -0.018                                                | -               |
|               |                                     | 370           | 2.268                | -0.012                                                | -               |
|               |                                     | 380           | 2.268                | -0.012                                                | -               |
|               |                                     | 390           | 2.279                | -0.001                                                | -               |
|               |                                     | 400           | 2.265                | -0.015                                                | -               |
|               |                                     | 410           | 2.265                | -0.015                                                | -               |
|               |                                     | 420           | 2.281                | 0.001                                                 | -               |
|               |                                     | 430           | 2.285                | 0.005                                                 | -               |
|               |                                     | 440           | 2.280                | 0.000                                                 | -               |
|               |                                     | 450           | 2.288                | 0.008                                                 | -               |
|               |                                     | 460           | 2.272                | -0.008                                                | -               |
| 470           | 2.294                               | 0.014         | -                    |                                                       |                 |
| 480           | 2.261                               | -0.019        | -                    |                                                       |                 |
| 490           | 2.258                               | -0.022        | -                    |                                                       |                 |
| 500           | 2.275                               | -0.005        | -                    |                                                       |                 |
| 510           | 2.272                               | -0.008        | -                    |                                                       |                 |
| 520           | 2.280                               | 0.000         | -                    |                                                       |                 |

|              |       |        |       |        |   |
|--------------|-------|--------|-------|--------|---|
|              |       | 530    | 2.301 | 0.021  | - |
|              |       | 540    | 2.288 | 0.008  | - |
|              |       | 550    | 2.288 | 0.008  | - |
|              |       | 560    | 2.271 | -0.009 | - |
|              |       | 570    | 2.269 | -0.011 | - |
|              |       | 580    | 2.274 | -0.006 | - |
|              |       | 590    | 2.267 | -0.013 | - |
|              |       | 600    | 2.268 | -0.012 | - |
| GFET<br>#C23 | 2.5   | -50    | 2.299 | 2.292  | - |
|              |       | -40    | 2.284 |        |   |
|              |       | -30    | 2.303 |        |   |
|              |       | -20    | 2.283 |        |   |
|              |       | -10    | 2.293 |        |   |
|              |       | 0      | 2.295 | 0.003  | - |
|              |       | 10     | 2.287 | -0.005 | - |
|              |       | 20     | 2.306 | 0.014  | - |
|              |       | 30     | 2.294 | 0.002  | - |
|              |       | 40     | 2.310 | 0.018  | - |
|              |       | 50     | 2.296 | 0.004  | - |
|              |       | 60     | 2.299 | 0.007  | - |
|              |       | 70     | 2.284 | -0.008 | - |
|              |       | 80     | 2.304 | 0.012  | - |
|              |       | 90     | 2.269 | -0.023 | - |
|              |       | 100    | 2.297 | 0.005  | - |
|              |       | 110    | 2.298 | 0.006  | - |
|              |       | 120    | 2.294 | 0.002  | - |
|              |       | 130    | 2.298 | 0.006  | - |
|              |       | 140    | 2.292 | 0.000  | - |
|              |       | 150    | 2.286 | -0.006 | - |
|              |       | 160    | 2.302 | 0.010  | - |
|              |       | 170    | 2.285 | -0.007 | - |
|              |       | 180    | 2.288 | -0.004 | - |
|              |       | 190    | 2.296 | 0.004  | - |
|              |       | 200    | 2.305 | 0.013  | - |
|              |       | 210    | 2.309 | 0.017  | - |
|              |       | 220    | 2.282 | -0.010 | - |
|              |       | 230    | 2.293 | 0.001  | - |
|              |       | 240    | 2.292 | 0.000  | - |
|              |       | 250    | 2.297 | 0.005  | - |
|              |       | 260    | 2.284 | -0.008 | - |
|              |       | 270    | 2.300 | 0.008  | - |
|              |       | 280    | 2.302 | 0.010  | - |
|              |       | 290    | 2.291 | -0.001 | - |
|              |       | 300    | 2.272 | -0.020 | - |
|              |       | 310    | 2.290 | -0.002 | - |
|              |       | 320    | 2.296 | 0.004  | - |
|              |       | 330    | 2.294 | 0.002  | - |
|              |       | 340    | 2.291 | -0.001 | - |
|              |       | 350    | 2.305 | 0.013  | - |
|              |       | 360    | 2.301 | 0.009  | - |
|              |       | 370    | 2.286 | -0.006 | - |
|              |       | 380    | 2.290 | -0.002 | - |
|              |       | 390    | 2.298 | 0.006  | - |
|              |       | 400    | 2.299 | 0.007  | - |
|              |       | 410    | 2.291 | -0.001 | - |
|              |       | 420    | 2.301 | 0.009  | - |
| 430          | 2.302 | 0.010  | -     |        |   |
| 440          | 2.290 | -0.002 | -     |        |   |
| 450          | 2.288 | -0.004 | -     |        |   |
| 460          | 2.299 | 0.007  | -     |        |   |
| 470          | 2.300 | 0.008  | -     |        |   |
| 480          | 2.297 | 0.005  | -     |        |   |

|              |       |        |       |        |   |
|--------------|-------|--------|-------|--------|---|
|              |       | 490    | 2.281 | -0.011 | - |
|              |       | 500    | 2.291 | -0.001 | - |
|              |       | 510    | 2.301 | 0.009  | - |
|              |       | 520    | 2.299 | 0.007  | - |
|              |       | 530    | 2.299 | 0.007  | - |
|              |       | 540    | 2.317 | 0.025  | - |
|              |       | 550    | 2.290 | -0.002 | - |
|              |       | 560    | 2.287 | -0.005 | - |
|              |       | 570    | 2.296 | 0.004  | - |
|              |       | 580    | 2.295 | 0.003  | - |
|              |       | 590    | 2.300 | 0.008  | - |
|              |       | 600    | 2.293 | 0.001  | - |
| GFET<br>#C24 | 5     | -50    | 2.254 | 2.270  | - |
|              |       | -40    | 2.283 |        |   |
|              |       | -30    | 2.278 |        |   |
|              |       | -20    | 2.271 |        |   |
|              |       | -10    | 2.262 |        |   |
|              |       | 0      | 2.262 | -0.008 | - |
|              |       | 10     | 2.265 | -0.005 | - |
|              |       | 20     | 2.250 | -0.020 | - |
|              |       | 30     | 2.266 | -0.004 | - |
|              |       | 40     | 2.283 | 0.013  | - |
|              |       | 50     | 2.271 | 0.001  | - |
|              |       | 60     | 2.280 | 0.010  | - |
|              |       | 70     | 2.250 | -0.020 | - |
|              |       | 80     | 2.256 | -0.014 | - |
|              |       | 90     | 2.276 | 0.006  | - |
|              |       | 100    | 2.238 | -0.032 | - |
|              |       | 110    | 2.266 | -0.004 | - |
|              |       | 120    | 2.260 | -0.010 | - |
|              |       | 130    | 2.255 | -0.015 | - |
|              |       | 140    | 2.262 | -0.008 | - |
|              |       | 150    | 2.262 | -0.008 | - |
|              |       | 160    | 2.265 | -0.005 | - |
|              |       | 170    | 2.246 | -0.024 | - |
|              |       | 180    | 2.254 | -0.016 | - |
|              |       | 190    | 2.247 | -0.023 | - |
|              |       | 200    | 2.270 | 0.000  | - |
|              |       | 210    | 2.266 | -0.004 | - |
|              |       | 220    | 2.266 | -0.004 | - |
|              |       | 230    | 2.274 | 0.004  | - |
|              |       | 240    | 2.284 | 0.014  | - |
|              |       | 250    | 2.254 | -0.016 | - |
|              |       | 260    | 2.271 | 0.001  | - |
|              |       | 270    | 2.276 | 0.006  | - |
|              |       | 280    | 2.283 | 0.013  | - |
|              |       | 290    | 2.261 | -0.009 | - |
|              |       | 300    | 2.268 | -0.002 | - |
|              |       | 310    | 2.246 | -0.024 | - |
|              |       | 320    | 2.248 | -0.022 | - |
|              |       | 330    | 2.280 | 0.010  | - |
|              |       | 340    | 2.257 | -0.013 | - |
| 350          | 2.271 | 0.001  | -     |        |   |
| 360          | 2.269 | -0.001 | -     |        |   |
| 370          | 2.255 | -0.015 | -     |        |   |
| 380          | 2.265 | -0.005 | -     |        |   |
| 390          | 2.271 | 0.001  | -     |        |   |
| 400          | 2.277 | 0.007  | -     |        |   |
| 410          | 2.269 | -0.001 | -     |        |   |
| 420          | 2.274 | 0.004  | -     |        |   |
| 430          | 2.278 | 0.008  | -     |        |   |
| 440          | 2.277 | 0.007  | -     |        |   |

|              |       |        |       |        |   |
|--------------|-------|--------|-------|--------|---|
|              |       | 450    | 2.256 | -0.014 | - |
|              |       | 460    | 2.277 | 0.007  | - |
|              |       | 470    | 2.281 | 0.011  | - |
|              |       | 480    | 2.248 | -0.022 | - |
|              |       | 490    | 2.272 | 0.002  | - |
|              |       | 500    | 2.273 | 0.003  | - |
|              |       | 510    | 2.273 | 0.003  | - |
|              |       | 520    | 2.279 | 0.009  | - |
|              |       | 530    | 2.281 | 0.011  | - |
|              |       | 540    | 2.277 | 0.007  | - |
|              |       | 550    | 2.238 | -0.032 | - |
|              |       | 560    | 2.283 | 0.013  | - |
|              |       | 570    | 2.282 | 0.012  | - |
|              |       | 580    | 2.294 | 0.024  | - |
|              |       | 590    | 2.282 | 0.012  | - |
|              |       | 600    | 2.259 | -0.011 | - |
| GFET<br>#C25 | 10    | -50    | 2.297 | 2.286  | - |
|              |       | -40    | 2.278 |        |   |
|              |       | -30    | 2.280 |        |   |
|              |       | -20    | 2.284 |        |   |
|              |       | -10    | 2.292 |        |   |
|              |       | 0      | 2.285 | -0.001 | - |
|              |       | 10     | 2.303 | 0.017  | - |
|              |       | 20     | 2.265 | -0.021 | - |
|              |       | 30     | 2.292 | 0.006  | - |
|              |       | 40     | 2.297 | 0.011  | - |
|              |       | 50     | 2.282 | -0.004 | - |
|              |       | 60     | 2.299 | 0.013  | - |
|              |       | 70     | 2.293 | 0.007  | - |
|              |       | 80     | 2.298 | 0.012  | - |
|              |       | 90     | 2.280 | -0.006 | - |
|              |       | 100    | 2.288 | 0.002  | - |
|              |       | 110    | 2.298 | 0.012  | - |
|              |       | 120    | 2.296 | 0.010  | - |
|              |       | 130    | 2.285 | -0.001 | - |
|              |       | 140    | 2.282 | -0.004 | - |
|              |       | 150    | 2.301 | 0.015  | - |
|              |       | 160    | 2.283 | -0.003 | - |
|              |       | 170    | 2.284 | -0.002 | - |
|              |       | 180    | 2.287 | 0.001  | - |
|              |       | 190    | 2.275 | -0.011 | - |
|              |       | 200    | 2.273 | -0.013 | - |
|              |       | 210    | 2.285 | -0.001 | - |
|              |       | 220    | 2.291 | 0.005  | - |
|              |       | 230    | 2.287 | 0.001  | - |
|              |       | 240    | 2.290 | 0.004  | - |
|              |       | 250    | 2.280 | -0.006 | - |
|              |       | 260    | 2.272 | -0.014 | - |
|              |       | 270    | 2.291 | 0.005  | - |
|              |       | 280    | 2.270 | -0.016 | - |
|              |       | 290    | 2.290 | 0.004  | - |
|              |       | 300    | 2.283 | -0.003 | - |
| 310          | 2.275 | -0.011 | -     |        |   |
| 320          | 2.287 | 0.001  | -     |        |   |
| 330          | 2.277 | -0.009 | -     |        |   |
| 340          | 2.290 | 0.004  | -     |        |   |
| 350          | 2.299 | 0.013  | -     |        |   |
| 360          | 2.282 | -0.004 | -     |        |   |
| 370          | 2.278 | -0.008 | -     |        |   |
| 380          | 2.288 | 0.002  | -     |        |   |
| 390          | 2.292 | 0.006  | -     |        |   |
| 400          | 2.277 | -0.009 | -     |        |   |

|              |       |        |       |        |   |
|--------------|-------|--------|-------|--------|---|
|              |       | 410    | 2.287 | 0.001  | - |
|              |       | 420    | 2.294 | 0.008  | - |
|              |       | 430    | 2.291 | 0.005  | - |
|              |       | 440    | 2.282 | -0.004 | - |
|              |       | 450    | 2.289 | 0.003  | - |
|              |       | 460    | 2.288 | 0.002  | - |
|              |       | 470    | 2.284 | -0.002 | - |
|              |       | 480    | 2.279 | -0.007 | - |
|              |       | 490    | 2.280 | -0.006 | - |
|              |       | 500    | 2.296 | 0.010  | - |
|              |       | 510    | 2.305 | 0.019  | - |
|              |       | 520    | 2.288 | 0.002  | - |
|              |       | 530    | 2.285 | -0.001 | - |
|              |       | 540    | 2.291 | 0.005  | - |
|              |       | 550    | 2.273 | -0.013 | - |
|              |       | 560    | 2.289 | 0.003  | - |
|              |       | 570    | 2.304 | 0.018  | - |
|              |       | 580    | 2.273 | -0.013 | - |
|              |       | 590    | 2.290 | 0.004  | - |
|              |       | 600    | 2.279 | -0.007 | - |
| GFET<br>#C26 | 25    | -50    | 2.282 | 2.283  | - |
|              |       | -40    | 2.280 |        |   |
|              |       | -30    | 2.282 |        |   |
|              |       | -20    | 2.277 |        |   |
|              |       | -10    | 2.293 |        |   |
|              |       | 0      | 2.279 | -0.004 | - |
|              |       | 10     | 2.273 | -0.010 | - |
|              |       | 20     | 2.268 | -0.015 | - |
|              |       | 30     | 2.285 | 0.002  | - |
|              |       | 40     | 2.271 | -0.012 | - |
|              |       | 50     | 2.278 | -0.005 | - |
|              |       | 60     | 2.277 | -0.006 | - |
|              |       | 70     | 2.270 | -0.013 | - |
|              |       | 80     | 2.272 | -0.011 | - |
|              |       | 90     | 2.281 | -0.002 | - |
|              |       | 100    | 2.281 | -0.002 | - |
|              |       | 110    | 2.278 | -0.005 | - |
|              |       | 120    | 2.271 | -0.012 | - |
|              |       | 130    | 2.285 | 0.002  | - |
|              |       | 140    | 2.288 | 0.005  | - |
|              |       | 150    | 2.282 | -0.001 | - |
|              |       | 160    | 2.286 | 0.003  | - |
|              |       | 170    | 2.284 | 0.001  | - |
|              |       | 180    | 2.271 | -0.012 | - |
|              |       | 190    | 2.268 | -0.015 | - |
|              |       | 200    | 2.284 | 0.001  | - |
|              |       | 210    | 2.276 | -0.007 | - |
|              |       | 220    | 2.295 | 0.012  | - |
|              |       | 230    | 2.281 | -0.002 | - |
|              |       | 240    | 2.279 | -0.004 | - |
|              |       | 250    | 2.271 | -0.012 | - |
|              |       | 260    | 2.286 | 0.003  | - |
|              |       | 270    | 2.272 | -0.011 | - |
|              |       | 280    | 2.278 | -0.005 | - |
|              |       | 290    | 2.301 | 0.018  | - |
|              |       | 300    | 2.275 | -0.008 | - |
| 310          | 2.279 | -0.004 | -     |        |   |
| 320          | 2.280 | -0.003 | -     |        |   |
| 330          | 2.267 | -0.016 | -     |        |   |
| 340          | 2.285 | 0.002  | -     |        |   |
| 350          | 2.253 | -0.030 | -     |        |   |
|              |       | 360    | 2.269 | -0.014 | - |

|              |       |        |       |        |   |
|--------------|-------|--------|-------|--------|---|
|              |       | 370    | 2.284 | 0.001  | - |
|              |       | 380    | 2.280 | -0.003 | - |
|              |       | 390    | 2.278 | -0.005 | - |
|              |       | 400    | 2.263 | -0.020 | - |
|              |       | 410    | 2.269 | -0.014 | - |
|              |       | 420    | 2.280 | -0.003 | - |
|              |       | 430    | 2.288 | 0.005  | - |
|              |       | 440    | 2.267 | -0.016 | - |
|              |       | 450    | 2.276 | -0.007 | - |
|              |       | 460    | 2.278 | -0.005 | - |
|              |       | 470    | 2.277 | -0.006 | - |
|              |       | 480    | 2.292 | 0.009  | - |
|              |       | 490    | 2.286 | 0.003  | - |
|              |       | 500    | 2.273 | -0.010 | - |
|              |       | 510    | 2.286 | 0.003  | - |
|              |       | 520    | 2.277 | -0.006 | - |
|              |       | 530    | 2.282 | -0.001 | - |
|              |       | 540    | 2.272 | -0.011 | - |
|              |       | 550    | 2.267 | -0.016 | - |
|              |       | 560    | 2.284 | 0.001  | - |
|              |       | 570    | 2.283 | 0.000  | - |
|              |       | 580    | 2.269 | -0.014 | - |
|              |       | 590    | 2.270 | -0.013 | - |
|              |       | 600    | 2.295 | 0.012  | - |
| GFET<br>#C27 | 50    | -50    | 2.309 | 2.306  | - |
|              |       | -40    | 2.310 |        |   |
|              |       | -30    | 2.295 |        |   |
|              |       | -20    | 2.312 |        |   |
|              |       | -10    | 2.302 |        |   |
|              |       | 0      | 2.279 | -0.027 | - |
|              |       | 10     | 2.308 | 0.002  | - |
|              |       | 20     | 2.300 | -0.006 | - |
|              |       | 30     | 2.294 | -0.012 | - |
|              |       | 40     | 2.304 | -0.002 | - |
|              |       | 50     | 2.302 | -0.004 | - |
|              |       | 60     | 2.278 | -0.028 | - |
|              |       | 70     | 2.308 | 0.002  | - |
|              |       | 80     | 2.313 | 0.007  | - |
|              |       | 90     | 2.303 | -0.003 | - |
|              |       | 100    | 2.307 | 0.001  | - |
|              |       | 110    | 2.306 | 0.000  | - |
|              |       | 120    | 2.298 | -0.008 | - |
|              |       | 130    | 2.305 | -0.001 | - |
|              |       | 140    | 2.318 | 0.012  | - |
|              |       | 150    | 2.319 | 0.013  | - |
|              |       | 160    | 2.289 | -0.017 | - |
|              |       | 170    | 2.297 | -0.009 | - |
|              |       | 180    | 2.310 | 0.004  | - |
|              |       | 190    | 2.316 | 0.010  | - |
|              |       | 200    | 2.319 | 0.013  | - |
|              |       | 210    | 2.303 | -0.003 | - |
|              |       | 220    | 2.312 | 0.006  | - |
|              |       | 230    | 2.294 | -0.012 | - |
|              |       | 240    | 2.306 | 0.000  | - |
|              |       | 250    | 2.296 | -0.010 | - |
|              |       | 260    | 2.310 | 0.004  | - |
| 270          | 2.313 | 0.007  | -     |        |   |
| 280          | 2.305 | -0.001 | -     |        |   |
| 290          | 2.304 | -0.002 | -     |        |   |
| 300          | 2.304 | -0.002 | -     |        |   |
| 310          | 2.324 | 0.018  | -     |        |   |
| 320          | 2.311 | 0.005  | -     |        |   |



|              |       |        |       |        |   |
|--------------|-------|--------|-------|--------|---|
|              |       | 330    | 2.298 | -0.008 | - |
|              |       | 340    | 2.306 | 0.000  | - |
|              |       | 350    | 2.288 | -0.018 | - |
|              |       | 360    | 2.310 | 0.004  | - |
|              |       | 370    | 2.298 | -0.008 | - |
|              |       | 380    | 2.314 | 0.008  | - |
|              |       | 390    | 2.309 | 0.003  | - |
|              |       | 400    | 2.275 | -0.031 | - |
|              |       | 410    | 2.315 | 0.009  | - |
|              |       | 420    | 2.317 | 0.011  | - |
|              |       | 430    | 2.311 | 0.005  | - |
|              |       | 440    | 2.311 | 0.005  | - |
|              |       | 450    | 2.328 | 0.022  | - |
|              |       | 460    | 2.296 | -0.010 | - |
|              |       | 470    | 2.297 | -0.009 | - |
|              |       | 480    | 2.305 | -0.001 | - |
|              |       | 490    | 2.297 | -0.009 | - |
|              |       | 500    | 2.326 | 0.020  | - |
|              |       | 510    | 2.295 | -0.011 | - |
|              |       | 520    | 2.306 | 0.000  | - |
|              |       | 530    | 2.315 | 0.009  | - |
|              |       | 540    | 2.303 | -0.003 | - |
|              |       | 550    | 2.297 | -0.009 | - |
|              |       | 560    | 2.307 | 0.001  | - |
|              |       | 570    | 2.297 | -0.009 | - |
|              |       | 580    | 2.311 | 0.005  | - |
|              |       | 590    | 2.318 | 0.012  | - |
|              |       | 600    | 2.306 | 0.000  | - |
| GFET<br>#C28 | 100   | -50    | 2.301 | 2.304  | - |
|              |       | -40    | 2.290 |        |   |
|              |       | -30    | 2.310 |        |   |
|              |       | -20    | 2.302 |        |   |
|              |       | -10    | 2.315 |        |   |
|              |       | 0      | 2.298 | -0.006 | - |
|              |       | 10     | 2.315 | 0.011  | - |
|              |       | 20     | 2.290 | -0.014 | - |
|              |       | 30     | 2.312 | 0.008  | - |
|              |       | 40     | 2.306 | 0.002  | - |
|              |       | 50     | 2.306 | 0.002  | - |
|              |       | 60     | 2.308 | 0.004  | - |
|              |       | 70     | 2.308 | 0.004  | - |
|              |       | 80     | 2.308 | 0.004  | - |
|              |       | 90     | 2.303 | -0.001 | - |
|              |       | 100    | 2.307 | 0.003  | - |
|              |       | 110    | 2.314 | 0.010  | - |
|              |       | 120    | 2.312 | 0.008  | - |
|              |       | 130    | 2.297 | -0.007 | - |
|              |       | 140    | 2.312 | 0.008  | - |
|              |       | 150    | 2.313 | 0.009  | - |
|              |       | 160    | 2.303 | -0.001 | - |
|              |       | 170    | 2.303 | -0.001 | - |
|              |       | 180    | 2.328 | 0.024  | - |
|              |       | 190    | 2.302 | -0.002 | - |
|              |       | 200    | 2.330 | 0.026  | - |
|              |       | 210    | 2.298 | -0.006 | - |
|              |       | 220    | 2.303 | -0.001 | - |
| 230          | 2.313 | 0.009  | -     |        |   |
| 240          | 2.295 | -0.009 | -     |        |   |
| 250          | 2.308 | 0.004  | -     |        |   |
| 260          | 2.295 | -0.009 | -     |        |   |
| 270          | 2.302 | -0.002 | -     |        |   |
| 280          | 2.299 | -0.005 | -     |        |   |

|  |  |     |       |        |   |
|--|--|-----|-------|--------|---|
|  |  | 290 | 2.315 | 0.011  | - |
|  |  | 300 | 2.320 | 0.016  | - |
|  |  | 310 | 2.292 | -0.012 | - |
|  |  | 320 | 2.289 | -0.015 | - |
|  |  | 330 | 2.306 | 0.002  | - |
|  |  | 340 | 2.300 | -0.004 | - |
|  |  | 350 | 2.324 | 0.020  | - |
|  |  | 360 | 2.308 | 0.004  | - |
|  |  | 370 | 2.310 | 0.006  | - |
|  |  | 380 | 2.320 | 0.016  | - |
|  |  | 390 | 2.291 | -0.013 | - |
|  |  | 400 | 2.316 | 0.012  | - |
|  |  | 410 | 2.317 | 0.013  | - |
|  |  | 420 | 2.308 | 0.004  | - |
|  |  | 430 | 2.315 | 0.011  | - |
|  |  | 440 | 2.313 | 0.009  | - |
|  |  | 450 | 2.298 | -0.006 | - |
|  |  | 460 | 2.310 | 0.006  | - |
|  |  | 470 | 2.304 | 0.000  | - |
|  |  | 480 | 2.304 | 0.000  | - |
|  |  | 490 | 2.306 | 0.002  | - |
|  |  | 500 | 2.314 | 0.010  | - |
|  |  | 510 | 2.314 | 0.010  | - |
|  |  | 520 | 2.309 | 0.005  | - |
|  |  | 530 | 2.297 | -0.007 | - |
|  |  | 540 | 2.323 | 0.019  | - |
|  |  | 550 | 2.304 | 0.000  | - |
|  |  | 560 | 2.308 | 0.004  | - |
|  |  | 570 | 2.312 | 0.008  | - |
|  |  | 580 | 2.305 | 0.001  | - |
|  |  | 590 | 2.316 | 0.012  | - |
|  |  | 600 | 2.317 | 0.013  | - |

**Table S8.** Responses of PTH antibody-CEA cross-reaction.

| Device number | CEA concentration, $c^{(CEA)}$ (nM) | Time, $t$ (s) | Experimental results    |                                                              | Fitting results |
|---------------|-------------------------------------|---------------|-------------------------|--------------------------------------------------------------|-----------------|
|               |                                     |               | $I_d$ ( $\mu\text{A}$ ) | $\Delta I_d = I_d - \overline{I_d}(t < 0)$ ( $\mu\text{A}$ ) | N/A             |
| GFET #C29     | 1                                   | -50           | 2.278                   | 2.285                                                        | -               |
|               |                                     | -40           | 2.282                   |                                                              |                 |
|               |                                     | -30           | 2.295                   |                                                              |                 |
|               |                                     | -20           | 2.294                   |                                                              |                 |
|               |                                     | -10           | 2.275                   |                                                              |                 |
|               |                                     | 0             | 2.284                   | -0.001                                                       | -               |
|               |                                     | 10            | 2.284                   | -0.001                                                       | -               |
|               |                                     | 20            | 2.285                   | 0.000                                                        | -               |
|               |                                     | 30            | 2.286                   | 0.001                                                        | -               |
|               |                                     | 40            | 2.285                   | 0.000                                                        | -               |
|               |                                     | 50            | 2.306                   | 0.021                                                        | -               |
|               |                                     | 60            | 2.287                   | 0.002                                                        | -               |
|               |                                     | 70            | 2.307                   | 0.022                                                        | -               |
|               |                                     | 80            | 2.282                   | -0.003                                                       | -               |
|               |                                     | 90            | 2.284                   | -0.001                                                       | -               |
|               |                                     | 100           | 2.262                   | -0.023                                                       | -               |
|               |                                     | 110           | 2.294                   | 0.009                                                        | -               |
|               |                                     | 120           | 2.293                   | 0.008                                                        | -               |
|               |                                     | 130           | 2.288                   | 0.003                                                        | -               |
|               |                                     | 140           | 2.287                   | 0.002                                                        | -               |
|               |                                     | 150           | 2.279                   | -0.006                                                       | -               |
|               |                                     | 160           | 2.298                   | 0.013                                                        | -               |
|               |                                     | 170           | 2.300                   | 0.015                                                        | -               |
|               |                                     | 180           | 2.280                   | -0.005                                                       | -               |
|               |                                     | 190           | 2.289                   | 0.004                                                        | -               |
|               |                                     | 200           | 2.293                   | 0.008                                                        | -               |
|               |                                     | 210           | 2.307                   | 0.022                                                        | -               |
|               |                                     | 220           | 2.296                   | 0.011                                                        | -               |
|               |                                     | 230           | 2.279                   | -0.006                                                       | -               |
|               |                                     | 240           | 2.269                   | -0.016                                                       | -               |
|               |                                     | 250           | 2.298                   | 0.013                                                        | -               |
|               |                                     | 260           | 2.282                   | -0.003                                                       | -               |
|               |                                     | 270           | 2.293                   | 0.008                                                        | -               |
|               |                                     | 280           | 2.269                   | -0.016                                                       | -               |
|               |                                     | 290           | 2.291                   | 0.006                                                        | -               |
|               |                                     | 300           | 2.296                   | 0.011                                                        | -               |
|               |                                     | 310           | 2.290                   | 0.005                                                        | -               |
|               |                                     | 320           | 2.277                   | -0.008                                                       | -               |
|               |                                     | 330           | 2.288                   | 0.003                                                        | -               |
|               |                                     | 340           | 2.301                   | 0.016                                                        | -               |
|               |                                     | 350           | 2.284                   | -0.001                                                       | -               |
|               |                                     | 360           | 2.294                   | 0.009                                                        | -               |
|               |                                     | 370           | 2.283                   | -0.002                                                       | -               |
|               |                                     | 380           | 2.294                   | 0.009                                                        | -               |
|               |                                     | 390           | 2.269                   | -0.016                                                       | -               |
|               |                                     | 400           | 2.287                   | 0.002                                                        | -               |
|               |                                     | 410           | 2.303                   | 0.018                                                        | -               |
|               |                                     | 420           | 2.265                   | -0.020                                                       | -               |
|               |                                     | 430           | 2.286                   | 0.001                                                        | -               |
|               |                                     | 440           | 2.292                   | 0.007                                                        | -               |
|               |                                     | 450           | 2.289                   | 0.004                                                        | -               |
|               |                                     | 460           | 2.279                   | -0.006                                                       | -               |
| 470           | 2.278                               | -0.007        | -                       |                                                              |                 |
| 480           | 2.301                               | 0.016         | -                       |                                                              |                 |
| 490           | 2.291                               | 0.006         | -                       |                                                              |                 |
| 500           | 2.293                               | 0.008         | -                       |                                                              |                 |
| 510           | 2.302                               | 0.017         | -                       |                                                              |                 |
| 520           | 2.288                               | 0.003         | -                       |                                                              |                 |

|              |       |        |       |        |   |
|--------------|-------|--------|-------|--------|---|
|              |       | 530    | 2.287 | 0.002  | - |
|              |       | 540    | 2.297 | 0.012  | - |
|              |       | 550    | 2.307 | 0.022  | - |
|              |       | 560    | 2.303 | 0.018  | - |
|              |       | 570    | 2.288 | 0.003  | - |
|              |       | 580    | 2.292 | 0.007  | - |
|              |       | 590    | 2.293 | 0.008  | - |
|              |       | 600    | 2.295 | 0.010  | - |
| GFET<br>#C30 | 2.5   | -50    | 2.272 | 2.274  | - |
|              |       | -40    | 2.282 |        |   |
|              |       | -30    | 2.269 |        |   |
|              |       | -20    | 2.267 |        |   |
|              |       | -10    | 2.282 |        |   |
|              |       | 0      | 2.287 | 0.013  | - |
|              |       | 10     | 2.266 | -0.008 | - |
|              |       | 20     | 2.279 | 0.005  | - |
|              |       | 30     | 2.260 | -0.014 | - |
|              |       | 40     | 2.281 | 0.007  | - |
|              |       | 50     | 2.265 | -0.009 | - |
|              |       | 60     | 2.272 | -0.002 | - |
|              |       | 70     | 2.285 | 0.011  | - |
|              |       | 80     | 2.234 | -0.040 | - |
|              |       | 90     | 2.256 | -0.018 | - |
|              |       | 100    | 2.262 | -0.012 | - |
|              |       | 110    | 2.294 | 0.020  | - |
|              |       | 120    | 2.286 | 0.012  | - |
|              |       | 130    | 2.242 | -0.032 | - |
|              |       | 140    | 2.262 | -0.012 | - |
|              |       | 150    | 2.278 | 0.004  | - |
|              |       | 160    | 2.257 | -0.017 | - |
|              |       | 170    | 2.288 | 0.014  | - |
|              |       | 180    | 2.290 | 0.016  | - |
|              |       | 190    | 2.276 | 0.002  | - |
|              |       | 200    | 2.271 | -0.003 | - |
|              |       | 210    | 2.234 | -0.040 | - |
|              |       | 220    | 2.274 | 0.000  | - |
|              |       | 230    | 2.290 | 0.016  | - |
|              |       | 240    | 2.273 | -0.001 | - |
|              |       | 250    | 2.267 | -0.007 | - |
|              |       | 260    | 2.288 | 0.014  | - |
|              |       | 270    | 2.262 | -0.012 | - |
|              |       | 280    | 2.283 | 0.009  | - |
|              |       | 290    | 2.281 | 0.007  | - |
|              |       | 300    | 2.284 | 0.010  | - |
|              |       | 310    | 2.278 | 0.004  | - |
|              |       | 320    | 2.278 | 0.004  | - |
|              |       | 330    | 2.270 | -0.004 | - |
|              |       | 340    | 2.283 | 0.009  | - |
|              |       | 350    | 2.277 | 0.003  | - |
|              |       | 360    | 2.286 | 0.012  | - |
|              |       | 370    | 2.282 | 0.008  | - |
|              |       | 380    | 2.248 | -0.026 | - |
|              |       | 390    | 2.252 | -0.022 | - |
|              |       | 400    | 2.285 | 0.011  | - |
|              |       | 410    | 2.279 | 0.005  | - |
|              |       | 420    | 2.279 | 0.005  | - |
| 430          | 2.276 | 0.002  | -     |        |   |
| 440          | 2.273 | -0.001 | -     |        |   |
| 450          | 2.269 | -0.005 | -     |        |   |
| 460          | 2.299 | 0.025  | -     |        |   |
| 470          | 2.275 | 0.001  | -     |        |   |
| 480          | 2.265 | -0.009 | -     |        |   |

|              |       |        |       |        |   |
|--------------|-------|--------|-------|--------|---|
|              |       | 490    | 2.260 | -0.014 | - |
|              |       | 500    | 2.277 | 0.003  | - |
|              |       | 510    | 2.282 | 0.008  | - |
|              |       | 520    | 2.289 | 0.015  | - |
|              |       | 530    | 2.288 | 0.014  | - |
|              |       | 540    | 2.271 | -0.003 | - |
|              |       | 550    | 2.276 | 0.002  | - |
|              |       | 560    | 2.290 | 0.016  | - |
|              |       | 570    | 2.270 | -0.004 | - |
|              |       | 580    | 2.290 | 0.016  | - |
|              |       | 590    | 2.267 | -0.007 | - |
|              |       | 600    | 2.282 | 0.008  | - |
| GFET<br>#C31 | 5     | -50    | 2.266 | 2.257  | - |
|              |       | -40    | 2.247 |        |   |
|              |       | -30    | 2.264 |        |   |
|              |       | -20    | 2.265 |        |   |
|              |       | -10    | 2.244 |        |   |
|              |       | 0      | 2.249 | -0.008 | - |
|              |       | 10     | 2.269 | 0.012  | - |
|              |       | 20     | 2.266 | 0.009  | - |
|              |       | 30     | 2.246 | -0.011 | - |
|              |       | 40     | 2.268 | 0.011  | - |
|              |       | 50     | 2.252 | -0.005 | - |
|              |       | 60     | 2.261 | 0.004  | - |
|              |       | 70     | 2.255 | -0.002 | - |
|              |       | 80     | 2.276 | 0.019  | - |
|              |       | 90     | 2.275 | 0.018  | - |
|              |       | 100    | 2.250 | -0.007 | - |
|              |       | 110    | 2.252 | -0.005 | - |
|              |       | 120    | 2.256 | -0.001 | - |
|              |       | 130    | 2.251 | -0.006 | - |
|              |       | 140    | 2.263 | 0.006  | - |
|              |       | 150    | 2.255 | -0.002 | - |
|              |       | 160    | 2.248 | -0.009 | - |
|              |       | 170    | 2.267 | 0.010  | - |
|              |       | 180    | 2.257 | 0.000  | - |
|              |       | 190    | 2.250 | -0.007 | - |
|              |       | 200    | 2.247 | -0.010 | - |
|              |       | 210    | 2.248 | -0.009 | - |
|              |       | 220    | 2.254 | -0.003 | - |
|              |       | 230    | 2.249 | -0.008 | - |
|              |       | 240    | 2.250 | -0.007 | - |
|              |       | 250    | 2.254 | -0.003 | - |
|              |       | 260    | 2.268 | 0.011  | - |
|              |       | 270    | 2.271 | 0.014  | - |
|              |       | 280    | 2.250 | -0.007 | - |
|              |       | 290    | 2.245 | -0.012 | - |
|              |       | 300    | 2.260 | 0.003  | - |
|              |       | 310    | 2.281 | 0.024  | - |
|              |       | 320    | 2.246 | -0.011 | - |
|              |       | 330    | 2.247 | -0.010 | - |
|              |       | 340    | 2.252 | -0.005 | - |
| 350          | 2.258 | 0.001  | -     |        |   |
| 360          | 2.263 | 0.006  | -     |        |   |
| 370          | 2.253 | -0.004 | -     |        |   |
| 380          | 2.264 | 0.007  | -     |        |   |
| 390          | 2.264 | 0.007  | -     |        |   |
| 400          | 2.250 | -0.007 | -     |        |   |
| 410          | 2.262 | 0.005  | -     |        |   |
| 420          | 2.247 | -0.010 | -     |        |   |
| 430          | 2.264 | 0.007  | -     |        |   |
| 440          | 2.261 | 0.004  | -     |        |   |

|              |       |        |       |        |   |
|--------------|-------|--------|-------|--------|---|
|              |       | 450    | 2.246 | -0.011 | - |
|              |       | 460    | 2.266 | 0.009  | - |
|              |       | 470    | 2.251 | -0.006 | - |
|              |       | 480    | 2.256 | -0.001 | - |
|              |       | 490    | 2.265 | 0.008  | - |
|              |       | 500    | 2.263 | 0.006  | - |
|              |       | 510    | 2.258 | 0.001  | - |
|              |       | 520    | 2.268 | 0.011  | - |
|              |       | 530    | 2.255 | -0.002 | - |
|              |       | 540    | 2.250 | -0.007 | - |
|              |       | 550    | 2.275 | 0.018  | - |
|              |       | 560    | 2.271 | 0.014  | - |
|              |       | 570    | 2.272 | 0.015  | - |
|              |       | 580    | 2.267 | 0.010  | - |
|              |       | 590    | 2.272 | 0.015  | - |
|              |       | 600    | 2.256 | -0.001 | - |
| GFET<br>#C32 | 10    | -50    | 2.301 | 2.303  | - |
|              |       | -40    | 2.300 |        |   |
|              |       | -30    | 2.300 |        |   |
|              |       | -20    | 2.321 |        |   |
|              |       | -10    | 2.295 |        |   |
|              |       | 0      | 2.303 | 0.000  | - |
|              |       | 10     | 2.306 | 0.003  | - |
|              |       | 20     | 2.312 | 0.009  | - |
|              |       | 30     | 2.303 | 0.000  | - |
|              |       | 40     | 2.302 | -0.001 | - |
|              |       | 50     | 2.312 | 0.009  | - |
|              |       | 60     | 2.292 | -0.011 | - |
|              |       | 70     | 2.297 | -0.006 | - |
|              |       | 80     | 2.310 | 0.007  | - |
|              |       | 90     | 2.310 | 0.007  | - |
|              |       | 100    | 2.311 | 0.008  | - |
|              |       | 110    | 2.314 | 0.011  | - |
|              |       | 120    | 2.310 | 0.007  | - |
|              |       | 130    | 2.306 | 0.003  | - |
|              |       | 140    | 2.300 | -0.003 | - |
|              |       | 150    | 2.308 | 0.005  | - |
|              |       | 160    | 2.290 | -0.013 | - |
|              |       | 170    | 2.294 | -0.009 | - |
|              |       | 180    | 2.302 | -0.001 | - |
|              |       | 190    | 2.307 | 0.004  | - |
|              |       | 200    | 2.285 | -0.018 | - |
|              |       | 210    | 2.304 | 0.001  | - |
|              |       | 220    | 2.314 | 0.011  | - |
|              |       | 230    | 2.309 | 0.006  | - |
|              |       | 240    | 2.310 | 0.007  | - |
|              |       | 250    | 2.305 | 0.002  | - |
|              |       | 260    | 2.315 | 0.012  | - |
|              |       | 270    | 2.311 | 0.008  | - |
|              |       | 280    | 2.297 | -0.006 | - |
|              |       | 290    | 2.304 | 0.001  | - |
|              |       | 300    | 2.324 | 0.021  | - |
| 310          | 2.299 | -0.004 | -     |        |   |
| 320          | 2.309 | 0.006  | -     |        |   |
| 330          | 2.308 | 0.005  | -     |        |   |
| 340          | 2.305 | 0.002  | -     |        |   |
| 350          | 2.299 | -0.004 | -     |        |   |
| 360          | 2.319 | 0.016  | -     |        |   |
| 370          | 2.305 | 0.002  | -     |        |   |
| 380          | 2.298 | -0.005 | -     |        |   |
| 390          | 2.296 | -0.007 | -     |        |   |
| 400          | 2.301 | -0.002 | -     |        |   |

|              |       |        |       |        |   |
|--------------|-------|--------|-------|--------|---|
|              |       | 410    | 2.306 | 0.003  | - |
|              |       | 420    | 2.298 | -0.005 | - |
|              |       | 430    | 2.297 | -0.006 | - |
|              |       | 440    | 2.306 | 0.003  | - |
|              |       | 450    | 2.308 | 0.005  | - |
|              |       | 460    | 2.326 | 0.023  | - |
|              |       | 470    | 2.321 | 0.018  | - |
|              |       | 480    | 2.294 | -0.009 | - |
|              |       | 490    | 2.294 | -0.009 | - |
|              |       | 500    | 2.317 | 0.014  | - |
|              |       | 510    | 2.297 | -0.006 | - |
|              |       | 520    | 2.318 | 0.015  | - |
|              |       | 530    | 2.307 | 0.004  | - |
|              |       | 540    | 2.320 | 0.017  | - |
|              |       | 550    | 2.302 | -0.001 | - |
|              |       | 560    | 2.319 | 0.016  | - |
|              |       | 570    | 2.308 | 0.005  | - |
|              |       | 580    | 2.292 | -0.011 | - |
|              |       | 590    | 2.308 | 0.005  | - |
|              |       | 600    | 2.306 | 0.003  | - |
| GFET<br>#C33 | 25    | -50    | 2.272 | 2.268  | - |
|              |       | -40    | 2.270 |        |   |
|              |       | -30    | 2.283 |        |   |
|              |       | -20    | 2.257 |        |   |
|              |       | -10    | 2.259 |        |   |
|              |       | 0      | 2.254 | -0.014 | - |
|              |       | 10     | 2.267 | -0.001 | - |
|              |       | 20     | 2.267 | -0.001 | - |
|              |       | 30     | 2.268 | 0.000  | - |
|              |       | 40     | 2.261 | -0.007 | - |
|              |       | 50     | 2.264 | -0.004 | - |
|              |       | 60     | 2.263 | -0.005 | - |
|              |       | 70     | 2.257 | -0.011 | - |
|              |       | 80     | 2.256 | -0.012 | - |
|              |       | 90     | 2.258 | -0.010 | - |
|              |       | 100    | 2.264 | -0.004 | - |
|              |       | 110    | 2.290 | 0.022  | - |
|              |       | 120    | 2.242 | -0.026 | - |
|              |       | 130    | 2.277 | 0.009  | - |
|              |       | 140    | 2.269 | 0.001  | - |
|              |       | 150    | 2.295 | 0.027  | - |
|              |       | 160    | 2.266 | -0.002 | - |
|              |       | 170    | 2.267 | -0.001 | - |
|              |       | 180    | 2.278 | 0.010  | - |
|              |       | 190    | 2.254 | -0.014 | - |
|              |       | 200    | 2.270 | 0.002  | - |
|              |       | 210    | 2.278 | 0.010  | - |
|              |       | 220    | 2.284 | 0.016  | - |
|              |       | 230    | 2.268 | 0.000  | - |
|              |       | 240    | 2.263 | -0.005 | - |
|              |       | 250    | 2.257 | -0.011 | - |
|              |       | 260    | 2.271 | 0.003  | - |
|              |       | 270    | 2.258 | -0.010 | - |
|              |       | 280    | 2.258 | -0.010 | - |
|              |       | 290    | 2.274 | 0.006  | - |
|              |       | 300    | 2.245 | -0.023 | - |
| 310          | 2.274 | 0.006  | -     |        |   |
| 320          | 2.276 | 0.008  | -     |        |   |
| 330          | 2.286 | 0.018  | -     |        |   |
| 340          | 2.264 | -0.004 | -     |        |   |
| 350          | 2.280 | 0.012  | -     |        |   |
| 360          | 2.282 | 0.014  | -     |        |   |

|              |       |        |       |        |   |
|--------------|-------|--------|-------|--------|---|
|              |       | 370    | 2.273 | 0.005  | - |
|              |       | 380    | 2.272 | 0.004  | - |
|              |       | 390    | 2.275 | 0.007  | - |
|              |       | 400    | 2.276 | 0.008  | - |
|              |       | 410    | 2.275 | 0.007  | - |
|              |       | 420    | 2.263 | -0.005 | - |
|              |       | 430    | 2.267 | -0.001 | - |
|              |       | 440    | 2.280 | 0.012  | - |
|              |       | 450    | 2.295 | 0.027  | - |
|              |       | 460    | 2.278 | 0.010  | - |
|              |       | 470    | 2.256 | -0.012 | - |
|              |       | 480    | 2.262 | -0.006 | - |
|              |       | 490    | 2.274 | 0.006  | - |
|              |       | 500    | 2.280 | 0.012  | - |
|              |       | 510    | 2.255 | -0.013 | - |
|              |       | 520    | 2.280 | 0.012  | - |
|              |       | 530    | 2.266 | -0.002 | - |
|              |       | 540    | 2.273 | 0.005  | - |
|              |       | 550    | 2.287 | 0.019  | - |
|              |       | 560    | 2.273 | 0.005  | - |
|              |       | 570    | 2.280 | 0.012  | - |
|              |       | 580    | 2.281 | 0.013  | - |
|              |       | 590    | 2.264 | -0.004 | - |
|              |       | 600    | 2.270 | 0.002  | - |
| GFET<br>#C34 | 50    | -50    | 2.271 | 2.274  | - |
|              |       | -40    | 2.277 |        |   |
|              |       | -30    | 2.282 |        |   |
|              |       | -20    | 2.258 |        |   |
|              |       | -10    | 2.280 |        |   |
|              |       | 0      | 2.239 | -0.035 | - |
|              |       | 10     | 2.265 | -0.009 | - |
|              |       | 20     | 2.264 | -0.010 | - |
|              |       | 30     | 2.270 | -0.004 | - |
|              |       | 40     | 2.254 | -0.020 | - |
|              |       | 50     | 2.261 | -0.013 | - |
|              |       | 60     | 2.259 | -0.015 | - |
|              |       | 70     | 2.259 | -0.015 | - |
|              |       | 80     | 2.270 | -0.004 | - |
|              |       | 90     | 2.263 | -0.011 | - |
|              |       | 100    | 2.261 | -0.013 | - |
|              |       | 110    | 2.276 | 0.002  | - |
|              |       | 120    | 2.287 | 0.013  | - |
|              |       | 130    | 2.268 | -0.006 | - |
|              |       | 140    | 2.272 | -0.002 | - |
|              |       | 150    | 2.241 | -0.033 | - |
|              |       | 160    | 2.255 | -0.019 | - |
|              |       | 170    | 2.259 | -0.015 | - |
|              |       | 180    | 2.282 | 0.008  | - |
|              |       | 190    | 2.279 | 0.005  | - |
|              |       | 200    | 2.266 | -0.008 | - |
|              |       | 210    | 2.263 | -0.011 | - |
|              |       | 220    | 2.274 | 0.000  | - |
|              |       | 230    | 2.259 | -0.015 | - |
|              |       | 240    | 2.277 | 0.003  | - |
|              |       | 250    | 2.265 | -0.009 | - |
|              |       | 260    | 2.276 | 0.002  | - |
| 270          | 2.269 | -0.005 | -     |        |   |
| 280          | 2.255 | -0.019 | -     |        |   |
| 290          | 2.268 | -0.006 | -     |        |   |
| 300          | 2.271 | -0.003 | -     |        |   |
| 310          | 2.269 | -0.005 | -     |        |   |
| 320          | 2.260 | -0.014 | -     |        |   |



|              |       |       |       |        |   |
|--------------|-------|-------|-------|--------|---|
|              |       | 330   | 2.262 | -0.012 | - |
|              |       | 340   | 2.263 | -0.011 | - |
|              |       | 350   | 2.262 | -0.012 | - |
|              |       | 360   | 2.264 | -0.010 | - |
|              |       | 370   | 2.271 | -0.003 | - |
|              |       | 380   | 2.262 | -0.012 | - |
|              |       | 390   | 2.279 | 0.005  | - |
|              |       | 400   | 2.277 | 0.003  | - |
|              |       | 410   | 2.271 | -0.003 | - |
|              |       | 420   | 2.280 | 0.006  | - |
|              |       | 430   | 2.271 | -0.003 | - |
|              |       | 440   | 2.264 | -0.010 | - |
|              |       | 450   | 2.257 | -0.017 | - |
|              |       | 460   | 2.264 | -0.010 | - |
|              |       | 470   | 2.268 | -0.006 | - |
|              |       | 480   | 2.247 | -0.027 | - |
|              |       | 490   | 2.272 | -0.002 | - |
|              |       | 500   | 2.265 | -0.009 | - |
|              |       | 510   | 2.276 | 0.002  | - |
|              |       | 520   | 2.252 | -0.022 | - |
|              |       | 530   | 2.260 | -0.014 | - |
|              |       | 540   | 2.280 | 0.006  | - |
|              |       | 550   | 2.260 | -0.014 | - |
|              |       | 560   | 2.286 | 0.012  | - |
|              |       | 570   | 2.271 | -0.003 | - |
|              |       | 580   | 2.264 | -0.010 | - |
|              |       | 590   | 2.261 | -0.013 | - |
|              |       | 600   | 2.276 | 0.002  | - |
| GFET<br>#C35 | 100   | -50   | 2.253 | 2.260  | - |
|              |       | -40   | 2.264 |        |   |
|              |       | -30   | 2.256 |        |   |
|              |       | -20   | 2.266 |        |   |
|              |       | -10   | 2.259 |        |   |
|              |       | 0     | 2.253 | -0.007 | - |
|              |       | 10    | 2.245 | -0.015 | - |
|              |       | 20    | 2.267 | 0.007  | - |
|              |       | 30    | 2.282 | 0.022  | - |
|              |       | 40    | 2.283 | 0.023  | - |
|              |       | 50    | 2.254 | -0.006 | - |
|              |       | 60    | 2.273 | 0.013  | - |
|              |       | 70    | 2.265 | 0.005  | - |
|              |       | 80    | 2.291 | 0.031  | - |
|              |       | 90    | 2.277 | 0.017  | - |
|              |       | 100   | 2.253 | -0.007 | - |
|              |       | 110   | 2.258 | -0.002 | - |
|              |       | 120   | 2.272 | 0.012  | - |
|              |       | 130   | 2.251 | -0.009 | - |
|              |       | 140   | 2.271 | 0.011  | - |
|              |       | 150   | 2.267 | 0.007  | - |
|              |       | 160   | 2.278 | 0.018  | - |
|              |       | 170   | 2.267 | 0.007  | - |
|              |       | 180   | 2.271 | 0.011  | - |
|              |       | 190   | 2.278 | 0.018  | - |
|              |       | 200   | 2.254 | -0.006 | - |
|              |       | 210   | 2.269 | 0.009  | - |
|              |       | 220   | 2.274 | 0.014  | - |
| 230          | 2.287 | 0.027 | -     |        |   |
| 240          | 2.268 | 0.008 | -     |        |   |
| 250          | 2.283 | 0.023 | -     |        |   |
| 260          | 2.265 | 0.005 | -     |        |   |
| 270          | 2.268 | 0.008 | -     |        |   |
| 280          | 2.283 | 0.023 | -     |        |   |

|  |  |     |       |        |   |
|--|--|-----|-------|--------|---|
|  |  | 290 | 2.262 | 0.002  | - |
|  |  | 300 | 2.269 | 0.009  | - |
|  |  | 310 | 2.259 | -0.001 | - |
|  |  | 320 | 2.256 | -0.004 | - |
|  |  | 330 | 2.265 | 0.005  | - |
|  |  | 340 | 2.276 | 0.016  | - |
|  |  | 350 | 2.282 | 0.022  | - |
|  |  | 360 | 2.286 | 0.026  | - |
|  |  | 370 | 2.283 | 0.023  | - |
|  |  | 380 | 2.288 | 0.028  | - |
|  |  | 390 | 2.264 | 0.004  | - |
|  |  | 400 | 2.273 | 0.013  | - |
|  |  | 410 | 2.288 | 0.028  | - |
|  |  | 420 | 2.267 | 0.007  | - |
|  |  | 430 | 2.274 | 0.014  | - |
|  |  | 440 | 2.277 | 0.017  | - |
|  |  | 450 | 2.271 | 0.011  | - |
|  |  | 460 | 2.290 | 0.030  | - |
|  |  | 470 | 2.267 | 0.007  | - |
|  |  | 480 | 2.283 | 0.023  | - |
|  |  | 490 | 2.275 | 0.015  | - |
|  |  | 500 | 2.272 | 0.012  | - |
|  |  | 510 | 2.280 | 0.020  | - |
|  |  | 520 | 2.280 | 0.020  | - |
|  |  | 530 | 2.277 | 0.017  | - |
|  |  | 540 | 2.285 | 0.025  | - |
|  |  | 550 | 2.271 | 0.011  | - |
|  |  | 560 | 2.285 | 0.025  | - |
|  |  | 570 | 2.284 | 0.024  | - |
|  |  | 580 | 2.275 | 0.015  | - |
|  |  | 590 | 2.276 | 0.016  | - |
|  |  | 600 | 2.301 | 0.041  | - |

**Table S9.** Responses of PTH antibody-AFP cross-reaction.

| Device number | AFP concentration, $c^{(AFP)}$ (nM) | Time, $t$ (s) | Experimental results |                                                       | Fitting results |
|---------------|-------------------------------------|---------------|----------------------|-------------------------------------------------------|-----------------|
|               |                                     |               | $I_d$ ( $\mu$ A)     | $\Delta I_d = I_d - \overline{I_d}(t < 0)$ ( $\mu$ A) | N/A             |
| GFET #C36     | 1                                   | -50           | 2.314                | 2.301                                                 | -               |
|               |                                     | -40           | 2.294                |                                                       |                 |
|               |                                     | -30           | 2.300                |                                                       |                 |
|               |                                     | -20           | 2.298                |                                                       |                 |
|               |                                     | -10           | 2.300                |                                                       |                 |
|               |                                     | 0             | 2.302                | 0.001                                                 | -               |
|               |                                     | 10            | 2.298                | -0.003                                                | -               |
|               |                                     | 20            | 2.305                | 0.004                                                 | -               |
|               |                                     | 30            | 2.313                | 0.012                                                 | -               |
|               |                                     | 40            | 2.302                | 0.001                                                 | -               |
|               |                                     | 50            | 2.305                | 0.004                                                 | -               |
|               |                                     | 60            | 2.295                | -0.006                                                | -               |
|               |                                     | 70            | 2.292                | -0.009                                                | -               |
|               |                                     | 80            | 2.298                | -0.003                                                | -               |
|               |                                     | 90            | 2.305                | 0.004                                                 | -               |
|               |                                     | 100           | 2.300                | -0.001                                                | -               |
|               |                                     | 110           | 2.296                | -0.005                                                | -               |
|               |                                     | 120           | 2.293                | -0.008                                                | -               |
|               |                                     | 130           | 2.312                | 0.011                                                 | -               |
|               |                                     | 140           | 2.301                | 0.000                                                 | -               |
|               |                                     | 150           | 2.294                | -0.007                                                | -               |
|               |                                     | 160           | 2.304                | 0.003                                                 | -               |
|               |                                     | 170           | 2.295                | -0.006                                                | -               |
|               |                                     | 180           | 2.305                | 0.004                                                 | -               |
|               |                                     | 190           | 2.292                | -0.009                                                | -               |
|               |                                     | 200           | 2.301                | 0.000                                                 | -               |
|               |                                     | 210           | 2.296                | -0.005                                                | -               |
|               |                                     | 220           | 2.316                | 0.015                                                 | -               |
|               |                                     | 230           | 2.310                | 0.009                                                 | -               |
|               |                                     | 240           | 2.316                | 0.015                                                 | -               |
|               |                                     | 250           | 2.303                | 0.002                                                 | -               |
|               |                                     | 260           | 2.313                | 0.012                                                 | -               |
|               |                                     | 270           | 2.309                | 0.008                                                 | -               |
|               |                                     | 280           | 2.315                | 0.014                                                 | -               |
|               |                                     | 290           | 2.320                | 0.019                                                 | -               |
|               |                                     | 300           | 2.306                | 0.005                                                 | -               |
|               |                                     | 310           | 2.317                | 0.016                                                 | -               |
|               |                                     | 320           | 2.314                | 0.013                                                 | -               |
|               |                                     | 330           | 2.304                | 0.003                                                 | -               |
|               |                                     | 340           | 2.304                | 0.003                                                 | -               |
|               |                                     | 350           | 2.299                | -0.002                                                | -               |
|               |                                     | 360           | 2.319                | 0.018                                                 | -               |
|               |                                     | 370           | 2.293                | -0.008                                                | -               |
|               |                                     | 380           | 2.305                | 0.004                                                 | -               |
|               |                                     | 390           | 2.301                | 0.000                                                 | -               |
|               |                                     | 400           | 2.311                | 0.010                                                 | -               |
|               |                                     | 410           | 2.282                | -0.019                                                | -               |
|               |                                     | 420           | 2.306                | 0.005                                                 | -               |
|               |                                     | 430           | 2.327                | 0.026                                                 | -               |
|               |                                     | 440           | 2.317                | 0.016                                                 | -               |
|               |                                     | 450           | 2.295                | -0.006                                                | -               |
|               |                                     | 460           | 2.292                | -0.009                                                | -               |
| 470           | 2.312                               | 0.011         | -                    |                                                       |                 |
| 480           | 2.317                               | 0.016         | -                    |                                                       |                 |
| 490           | 2.301                               | 0.000         | -                    |                                                       |                 |
| 500           | 2.333                               | 0.032         | -                    |                                                       |                 |
| 510           | 2.314                               | 0.013         | -                    |                                                       |                 |
| 520           | 2.317                               | 0.016         | -                    |                                                       |                 |

|              |       |        |       |        |   |
|--------------|-------|--------|-------|--------|---|
|              |       | 530    | 2.310 | 0.009  | - |
|              |       | 540    | 2.305 | 0.004  | - |
|              |       | 550    | 2.302 | 0.001  | - |
|              |       | 560    | 2.299 | -0.002 | - |
|              |       | 570    | 2.314 | 0.013  | - |
|              |       | 580    | 2.325 | 0.024  | - |
|              |       | 590    | 2.304 | 0.003  | - |
|              |       | 600    | 2.295 | -0.006 | - |
| GFET<br>#C37 | 2.5   | -50    | 2.284 | 2.306  | - |
|              |       | -40    | 2.302 |        |   |
|              |       | -30    | 2.316 |        |   |
|              |       | -20    | 2.308 |        |   |
|              |       | -10    | 2.319 |        |   |
|              |       | 0      | 2.304 | -0.002 | - |
|              |       | 10     | 2.318 | 0.012  | - |
|              |       | 20     | 2.302 | -0.004 | - |
|              |       | 30     | 2.308 | 0.002  | - |
|              |       | 40     | 2.280 | -0.026 | - |
|              |       | 50     | 2.296 | -0.010 | - |
|              |       | 60     | 2.309 | 0.003  | - |
|              |       | 70     | 2.325 | 0.019  | - |
|              |       | 80     | 2.312 | 0.006  | - |
|              |       | 90     | 2.308 | 0.002  | - |
|              |       | 100    | 2.303 | -0.003 | - |
|              |       | 110    | 2.292 | -0.014 | - |
|              |       | 120    | 2.308 | 0.002  | - |
|              |       | 130    | 2.306 | 0.000  | - |
|              |       | 140    | 2.323 | 0.017  | - |
|              |       | 150    | 2.301 | -0.005 | - |
|              |       | 160    | 2.311 | 0.005  | - |
|              |       | 170    | 2.312 | 0.006  | - |
|              |       | 180    | 2.318 | 0.012  | - |
|              |       | 190    | 2.295 | -0.011 | - |
|              |       | 200    | 2.315 | 0.009  | - |
|              |       | 210    | 2.296 | -0.010 | - |
|              |       | 220    | 2.297 | -0.009 | - |
|              |       | 230    | 2.309 | 0.003  | - |
|              |       | 240    | 2.299 | -0.007 | - |
|              |       | 250    | 2.314 | 0.008  | - |
|              |       | 260    | 2.308 | 0.002  | - |
|              |       | 270    | 2.308 | 0.002  | - |
|              |       | 280    | 2.312 | 0.006  | - |
|              |       | 290    | 2.293 | -0.013 | - |
|              |       | 300    | 2.309 | 0.003  | - |
|              |       | 310    | 2.298 | -0.008 | - |
|              |       | 320    | 2.299 | -0.007 | - |
|              |       | 330    | 2.313 | 0.007  | - |
|              |       | 340    | 2.302 | -0.004 | - |
|              |       | 350    | 2.299 | -0.007 | - |
|              |       | 360    | 2.299 | -0.007 | - |
|              |       | 370    | 2.314 | 0.008  | - |
|              |       | 380    | 2.304 | -0.002 | - |
|              |       | 390    | 2.320 | 0.014  | - |
|              |       | 400    | 2.298 | -0.008 | - |
|              |       | 410    | 2.298 | -0.008 | - |
|              |       | 420    | 2.306 | 0.000  | - |
| 430          | 2.310 | 0.004  | -     |        |   |
| 440          | 2.304 | -0.002 | -     |        |   |
| 450          | 2.333 | 0.027  | -     |        |   |
| 460          | 2.310 | 0.004  | -     |        |   |
| 470          | 2.304 | -0.002 | -     |        |   |
| 480          | 2.309 | 0.003  | -     |        |   |

|              |       |        |       |        |   |
|--------------|-------|--------|-------|--------|---|
|              |       | 490    | 2.304 | -0.002 | - |
|              |       | 500    | 2.293 | -0.013 | - |
|              |       | 510    | 2.302 | -0.004 | - |
|              |       | 520    | 2.303 | -0.003 | - |
|              |       | 530    | 2.304 | -0.002 | - |
|              |       | 540    | 2.300 | -0.006 | - |
|              |       | 550    | 2.316 | 0.010  | - |
|              |       | 560    | 2.304 | -0.002 | - |
|              |       | 570    | 2.310 | 0.004  | - |
|              |       | 580    | 2.319 | 0.013  | - |
|              |       | 590    | 2.311 | 0.005  | - |
|              |       | 600    | 2.312 | 0.006  | - |
| GFET<br>#C38 | 5     | -50    | 2.298 | 2.286  | - |
|              |       | -40    | 2.280 |        |   |
|              |       | -30    | 2.302 |        |   |
|              |       | -20    | 2.282 |        |   |
|              |       | -10    | 2.270 |        |   |
|              |       | 0      | 2.265 | -0.021 | - |
|              |       | 10     | 2.281 | -0.005 | - |
|              |       | 20     | 2.274 | -0.012 | - |
|              |       | 30     | 2.278 | -0.008 | - |
|              |       | 40     | 2.276 | -0.010 | - |
|              |       | 50     | 2.258 | -0.028 | - |
|              |       | 60     | 2.267 | -0.019 | - |
|              |       | 70     | 2.272 | -0.014 | - |
|              |       | 80     | 2.301 | 0.015  | - |
|              |       | 90     | 2.280 | -0.006 | - |
|              |       | 100    | 2.262 | -0.024 | - |
|              |       | 110    | 2.276 | -0.010 | - |
|              |       | 120    | 2.276 | -0.010 | - |
|              |       | 130    | 2.272 | -0.014 | - |
|              |       | 140    | 2.278 | -0.008 | - |
|              |       | 150    | 2.257 | -0.029 | - |
|              |       | 160    | 2.266 | -0.020 | - |
|              |       | 170    | 2.284 | -0.002 | - |
|              |       | 180    | 2.267 | -0.019 | - |
|              |       | 190    | 2.295 | 0.009  | - |
|              |       | 200    | 2.274 | -0.012 | - |
|              |       | 210    | 2.285 | -0.001 | - |
|              |       | 220    | 2.270 | -0.016 | - |
|              |       | 230    | 2.277 | -0.009 | - |
|              |       | 240    | 2.283 | -0.003 | - |
|              |       | 250    | 2.275 | -0.011 | - |
|              |       | 260    | 2.294 | 0.008  | - |
|              |       | 270    | 2.265 | -0.021 | - |
|              |       | 280    | 2.275 | -0.011 | - |
|              |       | 290    | 2.284 | -0.002 | - |
|              |       | 300    | 2.263 | -0.023 | - |
|              |       | 310    | 2.266 | -0.020 | - |
|              |       | 320    | 2.303 | 0.017  | - |
|              |       | 330    | 2.277 | -0.009 | - |
|              |       | 340    | 2.271 | -0.015 | - |
|              |       | 350    | 2.259 | -0.027 | - |
|              |       | 360    | 2.265 | -0.021 | - |
|              |       | 370    | 2.269 | -0.017 | - |
|              |       | 380    | 2.297 | 0.011  | - |
| 390          | 2.274 | -0.012 | -     |        |   |
| 400          | 2.293 | 0.007  | -     |        |   |
| 410          | 2.286 | 0.000  | -     |        |   |
| 420          | 2.304 | 0.018  | -     |        |   |
| 430          | 2.279 | -0.007 | -     |        |   |
| 440          | 2.277 | -0.009 | -     |        |   |

|              |       |       |       |        |   |
|--------------|-------|-------|-------|--------|---|
|              |       | 450   | 2.271 | -0.015 | - |
|              |       | 460   | 2.260 | -0.026 | - |
|              |       | 470   | 2.268 | -0.018 | - |
|              |       | 480   | 2.275 | -0.011 | - |
|              |       | 490   | 2.290 | 0.004  | - |
|              |       | 500   | 2.281 | -0.005 | - |
|              |       | 510   | 2.290 | 0.004  | - |
|              |       | 520   | 2.286 | 0.000  | - |
|              |       | 530   | 2.282 | -0.004 | - |
|              |       | 540   | 2.277 | -0.009 | - |
|              |       | 550   | 2.269 | -0.017 | - |
|              |       | 560   | 2.285 | -0.001 | - |
|              |       | 570   | 2.286 | 0.000  | - |
|              |       | 580   | 2.274 | -0.012 | - |
|              |       | 590   | 2.290 | 0.004  | - |
|              |       | 600   | 2.283 | -0.003 | - |
| GFET<br>#C39 | 10    | -50   | 2.304 | 2.304  | - |
|              |       | -40   | 2.305 |        |   |
|              |       | -30   | 2.300 |        |   |
|              |       | -20   | 2.310 |        |   |
|              |       | -10   | 2.299 |        |   |
|              |       | 0     | 2.328 | 0.024  | - |
|              |       | 10    | 2.316 | 0.012  | - |
|              |       | 20    | 2.320 | 0.016  | - |
|              |       | 30    | 2.302 | -0.002 | - |
|              |       | 40    | 2.315 | 0.011  | - |
|              |       | 50    | 2.319 | 0.015  | - |
|              |       | 60    | 2.326 | 0.022  | - |
|              |       | 70    | 2.321 | 0.017  | - |
|              |       | 80    | 2.305 | 0.001  | - |
|              |       | 90    | 2.317 | 0.013  | - |
|              |       | 100   | 2.313 | 0.009  | - |
|              |       | 110   | 2.305 | 0.001  | - |
|              |       | 120   | 2.314 | 0.010  | - |
|              |       | 130   | 2.323 | 0.019  | - |
|              |       | 140   | 2.327 | 0.023  | - |
|              |       | 150   | 2.308 | 0.004  | - |
|              |       | 160   | 2.322 | 0.018  | - |
|              |       | 170   | 2.324 | 0.020  | - |
|              |       | 180   | 2.312 | 0.008  | - |
|              |       | 190   | 2.306 | 0.002  | - |
|              |       | 200   | 2.317 | 0.013  | - |
|              |       | 210   | 2.334 | 0.030  | - |
|              |       | 220   | 2.307 | 0.003  | - |
|              |       | 230   | 2.337 | 0.033  | - |
|              |       | 240   | 2.318 | 0.014  | - |
|              |       | 250   | 2.310 | 0.006  | - |
|              |       | 260   | 2.318 | 0.014  | - |
|              |       | 270   | 2.316 | 0.012  | - |
|              |       | 280   | 2.315 | 0.011  | - |
|              |       | 290   | 2.322 | 0.018  | - |
|              |       | 300   | 2.309 | 0.005  | - |
| 310          | 2.312 | 0.008 | -     |        |   |
| 320          | 2.330 | 0.026 | -     |        |   |
| 330          | 2.330 | 0.026 | -     |        |   |
| 340          | 2.311 | 0.007 | -     |        |   |
| 350          | 2.337 | 0.033 | -     |        |   |
| 360          | 2.324 | 0.020 | -     |        |   |
| 370          | 2.324 | 0.020 | -     |        |   |
| 380          | 2.304 | 0.000 | -     |        |   |
| 390          | 2.308 | 0.004 | -     |        |   |
| 400          | 2.310 | 0.006 | -     |        |   |

|              |       |        |       |        |   |
|--------------|-------|--------|-------|--------|---|
|              |       | 410    | 2.309 | 0.005  | — |
|              |       | 420    | 2.332 | 0.028  | — |
|              |       | 430    | 2.320 | 0.016  | — |
|              |       | 440    | 2.318 | 0.014  | — |
|              |       | 450    | 2.318 | 0.014  | — |
|              |       | 460    | 2.316 | 0.012  | — |
|              |       | 470    | 2.316 | 0.012  | — |
|              |       | 480    | 2.326 | 0.022  | — |
|              |       | 490    | 2.322 | 0.018  | — |
|              |       | 500    | 2.338 | 0.034  | — |
|              |       | 510    | 2.327 | 0.023  | — |
|              |       | 520    | 2.322 | 0.018  | — |
|              |       | 530    | 2.316 | 0.012  | — |
|              |       | 540    | 2.324 | 0.020  | — |
|              |       | 550    | 2.326 | 0.022  | — |
|              |       | 560    | 2.326 | 0.022  | — |
|              |       | 570    | 2.311 | 0.007  | — |
|              |       | 580    | 2.335 | 0.031  | — |
|              |       | 590    | 2.326 | 0.022  | — |
|              |       | 600    | 2.337 | 0.033  | — |
| GFET<br>#C40 | 25    | -50    | 2.258 | 2.259  | — |
|              |       | -40    | 2.251 |        |   |
|              |       | -30    | 2.253 |        |   |
|              |       | -20    | 2.273 |        |   |
|              |       | -10    | 2.261 |        |   |
|              |       | 0      | 2.255 | -0.004 | — |
|              |       | 10     | 2.279 | 0.020  | — |
|              |       | 20     | 2.258 | -0.001 | — |
|              |       | 30     | 2.277 | 0.018  | — |
|              |       | 40     | 2.284 | 0.025  | — |
|              |       | 50     | 2.253 | -0.006 | — |
|              |       | 60     | 2.249 | -0.010 | — |
|              |       | 70     | 2.272 | 0.013  | — |
|              |       | 80     | 2.275 | 0.016  | — |
|              |       | 90     | 2.260 | 0.001  | — |
|              |       | 100    | 2.264 | 0.005  | — |
|              |       | 110    | 2.257 | -0.002 | — |
|              |       | 120    | 2.264 | 0.005  | — |
|              |       | 130    | 2.265 | 0.006  | — |
|              |       | 140    | 2.272 | 0.013  | — |
|              |       | 150    | 2.283 | 0.024  | — |
|              |       | 160    | 2.274 | 0.015  | — |
|              |       | 170    | 2.251 | -0.008 | — |
|              |       | 180    | 2.269 | 0.010  | — |
|              |       | 190    | 2.272 | 0.013  | — |
|              |       | 200    | 2.251 | -0.008 | — |
|              |       | 210    | 2.266 | 0.007  | — |
|              |       | 220    | 2.277 | 0.018  | — |
|              |       | 230    | 2.274 | 0.015  | — |
|              |       | 240    | 2.271 | 0.012  | — |
|              |       | 250    | 2.269 | 0.010  | — |
|              |       | 260    | 2.258 | -0.001 | — |
|              |       | 270    | 2.272 | 0.013  | — |
|              |       | 280    | 2.265 | 0.006  | — |
|              |       | 290    | 2.266 | 0.007  | — |
|              |       | 300    | 2.252 | -0.007 | — |
| 310          | 2.273 | 0.014  | —     |        |   |
| 320          | 2.252 | -0.007 | —     |        |   |
| 330          | 2.271 | 0.012  | —     |        |   |
| 340          | 2.282 | 0.023  | —     |        |   |
| 350          | 2.261 | 0.002  | —     |        |   |
|              |       | 360    | 2.237 | -0.022 | — |

|              |       |        |       |        |   |
|--------------|-------|--------|-------|--------|---|
|              |       | 370    | 2.265 | 0.006  | - |
|              |       | 380    | 2.259 | 0.000  | - |
|              |       | 390    | 2.253 | -0.006 | - |
|              |       | 400    | 2.271 | 0.012  | - |
|              |       | 410    | 2.263 | 0.004  | - |
|              |       | 420    | 2.284 | 0.025  | - |
|              |       | 430    | 2.270 | 0.011  | - |
|              |       | 440    | 2.261 | 0.002  | - |
|              |       | 450    | 2.278 | 0.019  | - |
|              |       | 460    | 2.272 | 0.013  | - |
|              |       | 470    | 2.261 | 0.002  | - |
|              |       | 480    | 2.258 | -0.001 | - |
|              |       | 490    | 2.265 | 0.006  | - |
|              |       | 500    | 2.270 | 0.011  | - |
|              |       | 510    | 2.258 | -0.001 | - |
|              |       | 520    | 2.274 | 0.015  | - |
|              |       | 530    | 2.263 | 0.004  | - |
|              |       | 540    | 2.272 | 0.013  | - |
|              |       | 550    | 2.261 | 0.002  | - |
|              |       | 560    | 2.285 | 0.026  | - |
|              |       | 570    | 2.273 | 0.014  | - |
|              |       | 580    | 2.273 | 0.014  | - |
|              |       | 590    | 2.267 | 0.008  | - |
|              |       | 600    | 2.263 | 0.004  | - |
| GFET<br>#C41 | 50    | -50    | 2.282 | 2.272  | - |
|              |       | -40    | 2.257 |        |   |
|              |       | -30    | 2.261 |        |   |
|              |       | -20    | 2.288 |        |   |
|              |       | -10    | 2.271 |        |   |
|              |       | 0      | 2.290 | 0.018  | - |
|              |       | 10     | 2.281 | 0.009  | - |
|              |       | 20     | 2.292 | 0.020  | - |
|              |       | 30     | 2.266 | -0.006 | - |
|              |       | 40     | 2.265 | -0.007 | - |
|              |       | 50     | 2.288 | 0.016  | - |
|              |       | 60     | 2.277 | 0.005  | - |
|              |       | 70     | 2.257 | -0.015 | - |
|              |       | 80     | 2.273 | 0.001  | - |
|              |       | 90     | 2.280 | 0.008  | - |
|              |       | 100    | 2.263 | -0.009 | - |
|              |       | 110    | 2.279 | 0.007  | - |
|              |       | 120    | 2.291 | 0.019  | - |
|              |       | 130    | 2.252 | -0.020 | - |
|              |       | 140    | 2.283 | 0.011  | - |
|              |       | 150    | 2.279 | 0.007  | - |
|              |       | 160    | 2.254 | -0.018 | - |
|              |       | 170    | 2.274 | 0.002  | - |
|              |       | 180    | 2.263 | -0.009 | - |
|              |       | 190    | 2.289 | 0.017  | - |
|              |       | 200    | 2.271 | -0.001 | - |
|              |       | 210    | 2.287 | 0.015  | - |
|              |       | 220    | 2.272 | 0.000  | - |
|              |       | 230    | 2.278 | 0.006  | - |
|              |       | 240    | 2.277 | 0.005  | - |
|              |       | 250    | 2.267 | -0.005 | - |
|              |       | 260    | 2.279 | 0.007  | - |
| 270          | 2.300 | 0.028  | -     |        |   |
| 280          | 2.282 | 0.010  | -     |        |   |
| 290          | 2.280 | 0.008  | -     |        |   |
| 300          | 2.270 | -0.002 | -     |        |   |
| 310          | 2.284 | 0.012  | -     |        |   |
| 320          | 2.295 | 0.023  | -     |        |   |



|              |       |        |       |        |   |
|--------------|-------|--------|-------|--------|---|
|              |       | 330    | 2.285 | 0.013  | - |
|              |       | 340    | 2.288 | 0.016  | - |
|              |       | 350    | 2.263 | -0.009 | - |
|              |       | 360    | 2.281 | 0.009  | - |
|              |       | 370    | 2.270 | -0.002 | - |
|              |       | 380    | 2.275 | 0.003  | - |
|              |       | 390    | 2.284 | 0.012  | - |
|              |       | 400    | 2.297 | 0.025  | - |
|              |       | 410    | 2.270 | -0.002 | - |
|              |       | 420    | 2.306 | 0.034  | - |
|              |       | 430    | 2.266 | -0.006 | - |
|              |       | 440    | 2.272 | 0.000  | - |
|              |       | 450    | 2.293 | 0.021  | - |
|              |       | 460    | 2.270 | -0.002 | - |
|              |       | 470    | 2.294 | 0.022  | - |
|              |       | 480    | 2.274 | 0.002  | - |
|              |       | 490    | 2.272 | 0.000  | - |
|              |       | 500    | 2.290 | 0.018  | - |
|              |       | 510    | 2.268 | -0.004 | - |
|              |       | 520    | 2.297 | 0.025  | - |
|              |       | 530    | 2.272 | 0.000  | - |
|              |       | 540    | 2.292 | 0.020  | - |
|              |       | 550    | 2.284 | 0.012  | - |
|              |       | 560    | 2.271 | -0.001 | - |
|              |       | 570    | 2.292 | 0.020  | - |
|              |       | 580    | 2.282 | 0.010  | - |
|              |       | 590    | 2.289 | 0.017  | - |
|              |       | 600    | 2.285 | 0.013  | - |
| GFET<br>#C42 | 100   | -50    | 2.266 | 2.276  | - |
|              |       | -40    | 2.290 |        |   |
|              |       | -30    | 2.284 |        |   |
|              |       | -20    | 2.265 |        |   |
|              |       | -10    | 2.277 |        |   |
|              |       | 0      | 2.265 | -0.011 | - |
|              |       | 10     | 2.297 | 0.021  | - |
|              |       | 20     | 2.270 | -0.006 | - |
|              |       | 30     | 2.250 | -0.026 | - |
|              |       | 40     | 2.242 | -0.034 | - |
|              |       | 50     | 2.275 | -0.001 | - |
|              |       | 60     | 2.262 | -0.014 | - |
|              |       | 70     | 2.250 | -0.026 | - |
|              |       | 80     | 2.264 | -0.012 | - |
|              |       | 90     | 2.274 | -0.002 | - |
|              |       | 100    | 2.248 | -0.028 | - |
|              |       | 110    | 2.281 | 0.005  | - |
|              |       | 120    | 2.274 | -0.002 | - |
|              |       | 130    | 2.264 | -0.012 | - |
|              |       | 140    | 2.259 | -0.017 | - |
|              |       | 150    | 2.274 | -0.002 | - |
|              |       | 160    | 2.283 | 0.007  | - |
|              |       | 170    | 2.284 | 0.008  | - |
|              |       | 180    | 2.264 | -0.012 | - |
|              |       | 190    | 2.283 | 0.007  | - |
|              |       | 200    | 2.286 | 0.010  | - |
|              |       | 210    | 2.263 | -0.013 | - |
|              |       | 220    | 2.279 | 0.003  | - |
| 230          | 2.270 | -0.006 | -     |        |   |
| 240          | 2.271 | -0.005 | -     |        |   |
| 250          | 2.270 | -0.006 | -     |        |   |
| 260          | 2.286 | 0.010  | -     |        |   |
| 270          | 2.266 | -0.010 | -     |        |   |
| 280          | 2.288 | 0.012  | -     |        |   |

|  |  |     |       |        |   |
|--|--|-----|-------|--------|---|
|  |  | 290 | 2.264 | -0.012 | - |
|  |  | 300 | 2.270 | -0.006 | - |
|  |  | 310 | 2.256 | -0.020 | - |
|  |  | 320 | 2.271 | -0.005 | - |
|  |  | 330 | 2.308 | 0.032  | - |
|  |  | 340 | 2.283 | 0.007  | - |
|  |  | 350 | 2.292 | 0.016  | - |
|  |  | 360 | 2.278 | 0.002  | - |
|  |  | 370 | 2.263 | -0.013 | - |
|  |  | 380 | 2.276 | 0.000  | - |
|  |  | 390 | 2.286 | 0.010  | - |
|  |  | 400 | 2.278 | 0.002  | - |
|  |  | 410 | 2.278 | 0.002  | - |
|  |  | 420 | 2.291 | 0.015  | - |
|  |  | 430 | 2.269 | -0.007 | - |
|  |  | 440 | 2.265 | -0.011 | - |
|  |  | 450 | 2.246 | -0.030 | - |
|  |  | 460 | 2.267 | -0.009 | - |
|  |  | 470 | 2.285 | 0.009  | - |
|  |  | 480 | 2.285 | 0.009  | - |
|  |  | 490 | 2.291 | 0.015  | - |
|  |  | 500 | 2.278 | 0.002  | - |
|  |  | 510 | 2.268 | -0.008 | - |
|  |  | 520 | 2.279 | 0.003  | - |
|  |  | 530 | 2.281 | 0.005  | - |
|  |  | 540 | 2.268 | -0.008 | - |
|  |  | 550 | 2.271 | -0.005 | - |
|  |  | 560 | 2.270 | -0.006 | - |
|  |  | 570 | 2.301 | 0.025  | - |
|  |  | 580 | 2.257 | -0.019 | - |
|  |  | 590 | 2.272 | -0.004 | - |
|  |  | 600 | 2.253 | -0.023 | - |

## 7 Multiplexed immunosensing protocol (three biomarkers in PBS/serum)

To detect the concentrations of CEA, AFP and PTH in mixture samples, the kinetic processes corresponding to 64 mixture samples were measured. During each measurement, the GFET device was disposablely used. The procedures of biochemical functionalization (including electrical measurement) are presented as follows. As shown in **Figure S5**, steps 1) and 2) are same to those in **Figure S2**. In particular, the electrical measurements are only carried out in step 6).

- 1) We first rinse the microfluidic channels with the PBS solution.
- 2) The conductive MBA-NHS linkers are immobilized on three gold top-gate pads.
- 3) By plugging the 2nd and 3rd outlets of the microfluidic channels, the CEA-antibody molecules are immobilized on the 1st pad (TG1) via the amino-coupling reaction. The excessive NHS-groups are deactivated by ethanolamine.
- 4) By plugging the 1st and 3rd outlets of the microfluidic channels, the AFP-antibody molecules are similarly immobilized on the 2nd pad (TG2).
- 5) By plugging the 1st and 2nd outlets of the microfluidic channels, the PTH-antibody molecules are similarly immobilized on the 3rd pad (TG3).
- 6) After rinsing the microfluidic channels with PBS, a mixture sample is syringed. Under the electrical conditions  $V_{ds} = 100$  mV and  $V_{gs} = 2$  V, a 650-s kinetic process ( $I_d$  vs  $t$ ,  $-50$  s  $\leq t \leq 600$  s) is recorded.

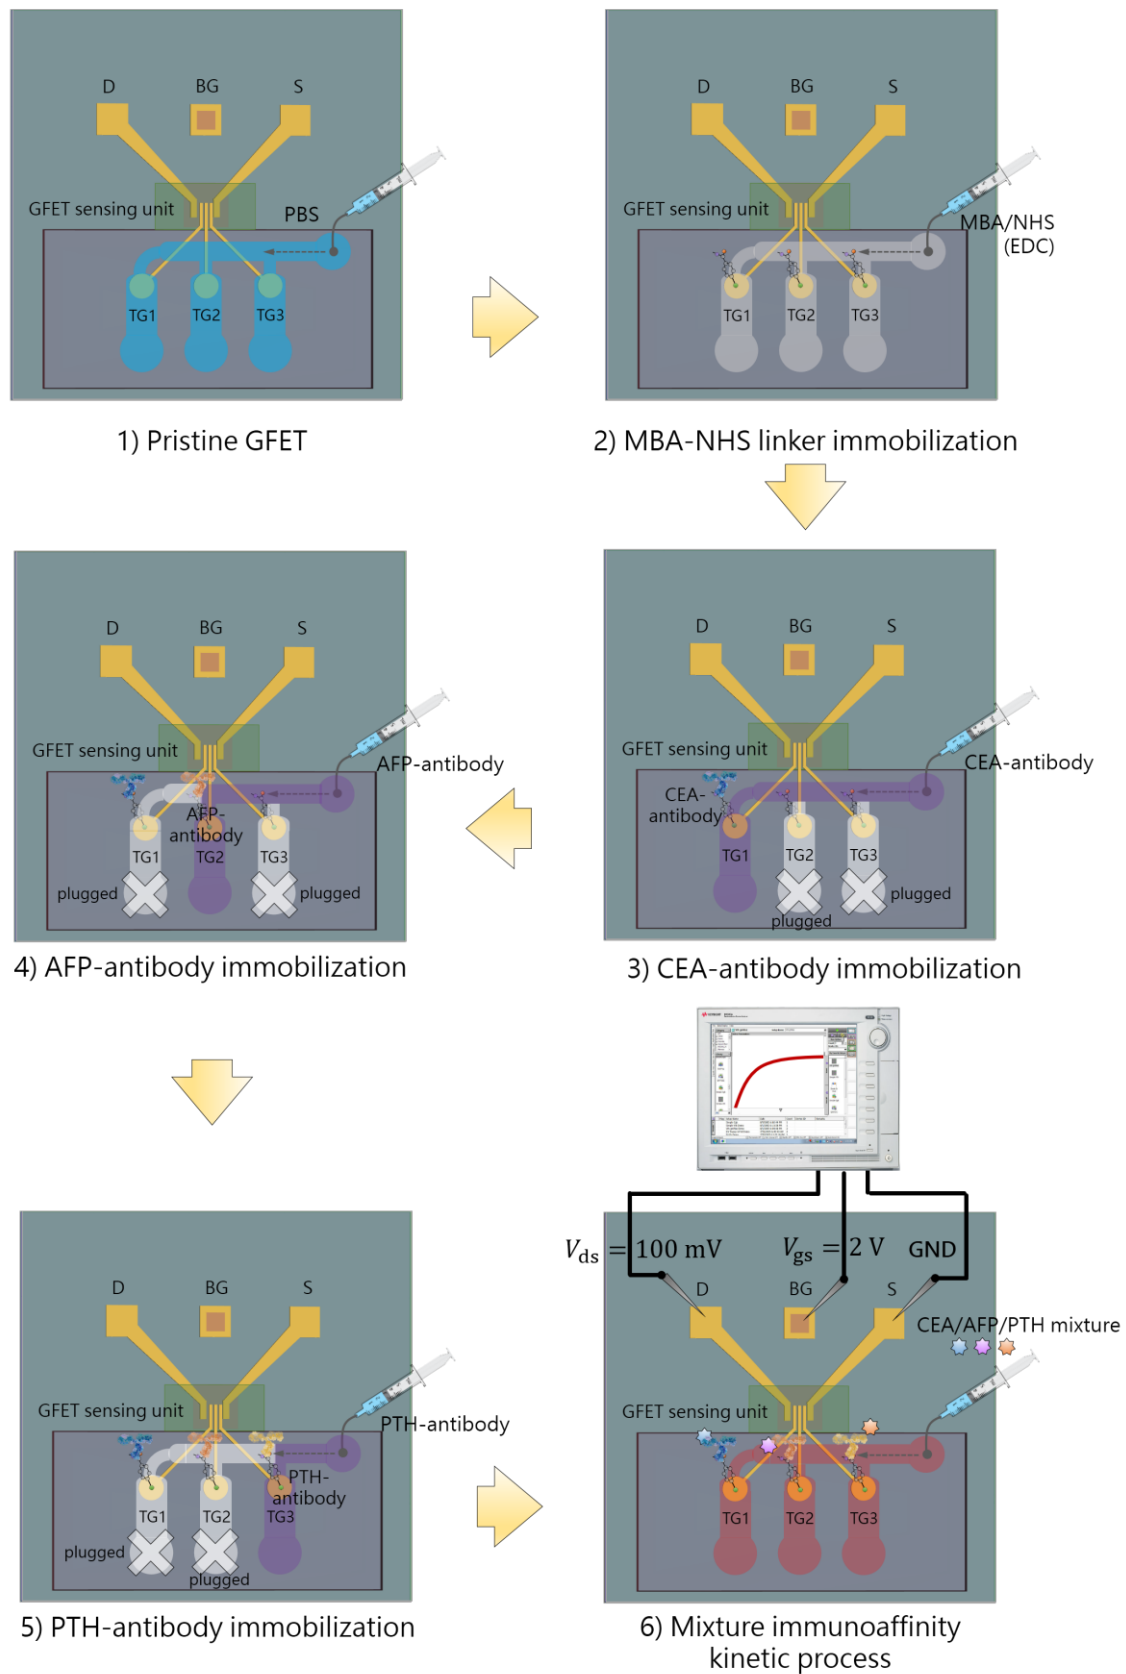

**Figure S5.** To measure a kinetic process of a mixture sample (CEA, AFP and PTH), the antibodies are immobilized on TG1, TG2 and TG3, respectively. Then, in step 6), a mixture sample is introduced, and the corresponding kinetic response curve ( $I_d$  vs  $t$ ) is continuously recorded.

## 8 Dataset of multiplexed immunosensing (three biomarkers in PBS)

Following the experimental protocol in **Section 7**, the kinetic processes of 64 mixture samples (in PBS) were measured, respectively. In the measurement of each mixture sample, a GFET device was disposably used (#M1 – #M64).

Corresponding to **Figure 4b** in the main text, the detailed experimental data and the numerical fitting results are presented in **Figure S6** and **Table S10**. Herein, the kinetic parameters estimated in **Section 5**  $k_a^{(\text{CEA})} = 357053.24 \text{ M}^{-1}\text{s}^{-1}$ ,  $k_d^{(\text{CEA})} = 0.0003055 \text{ s}^{-1}$ ,  $k_a^{(\text{AFP})} = 99465.16 \text{ M}^{-1}\text{s}^{-1}$ ,  $k_d^{(\text{AFP})} = 0.0008749 \text{ s}^{-1}$ ,  $k_a^{(\text{PTH})} = 1020100.24 \text{ M}^{-1}\text{s}^{-1}$  and  $k_d^{(\text{PTH})} = 0.0023879 \text{ s}^{-1}$ , were utilized as known conditions. Based on the fitting function Eq. (2) in the main text<sup>6</sup>, the concentrations of CEA, AFP and PTH in each mixture sample were retrieved as  $\tilde{c}^{(\text{CEA})}$ ,  $\tilde{c}^{(\text{AFP})}$  and  $\tilde{c}^{(\text{PTH})}$ , for the comparison with their true values  $c^{(\text{CEA})}$ ,  $c^{(\text{AFP})}$  and  $c^{(\text{PTH})}$ .

**GFET #M1**

CEA 2 nM; AFP 5 nM; PTH 2 nM

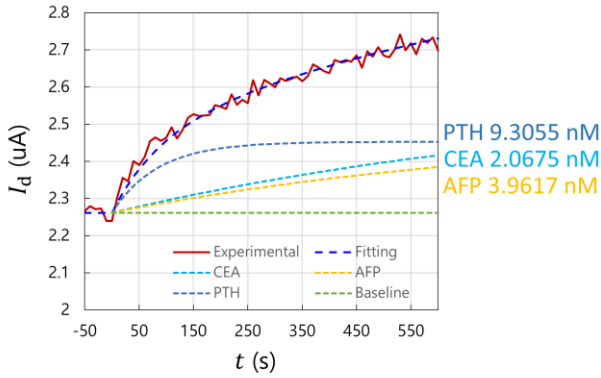**GFET #M2**

CEA 2 nM; AFP 5 nM; PTH 5 nM

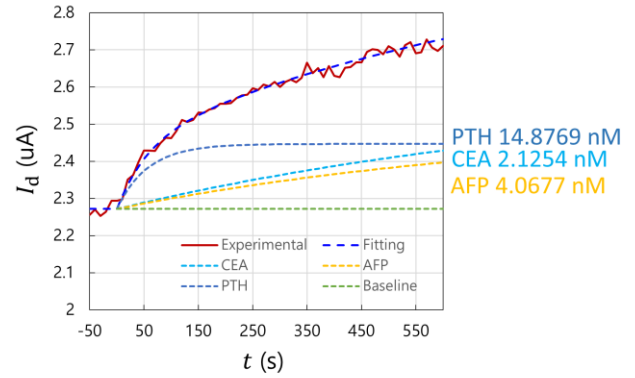**GFET #M3**

CEA 2 nM; AFP 5 nM; PTH 20 nM

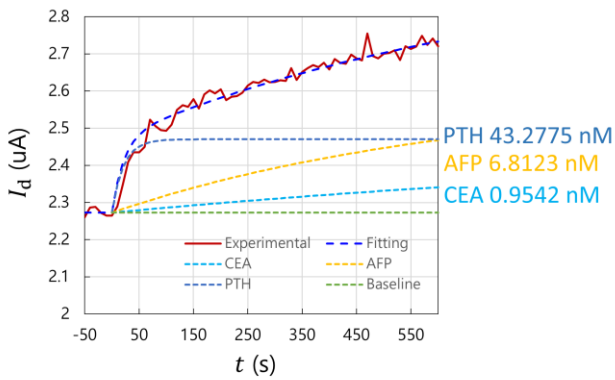**GFET #M4**

CEA 2 nM; AFP 5 nM; PTH 50 nM

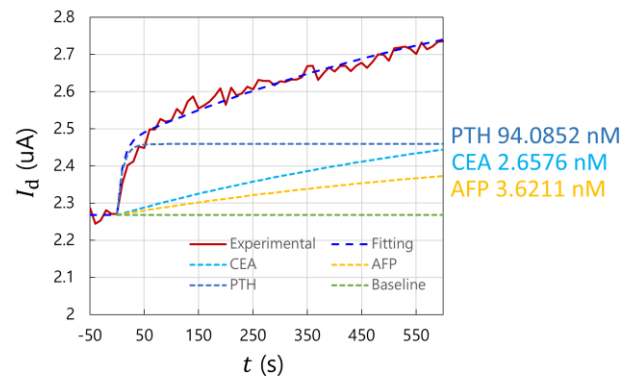**GFET #M5**

CEA 2 nM; AFP 20 nM; PTH 2 nM

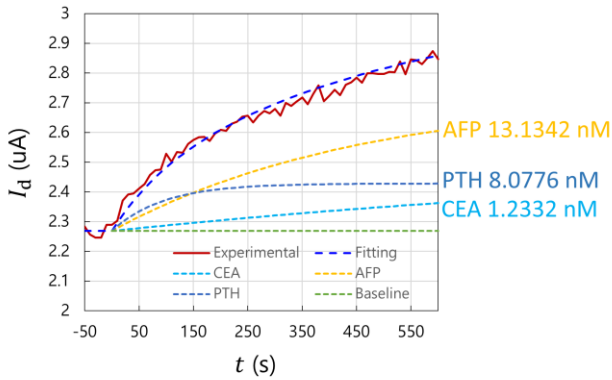**GFET #M6**

CEA 2 nM; AFP 20 nM; PTH 5 nM

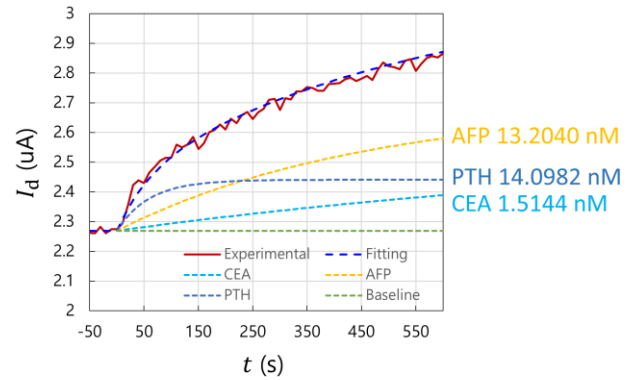**GFET #M7**

CEA 2 nM; AFP 20 nM; PTH 20 nM

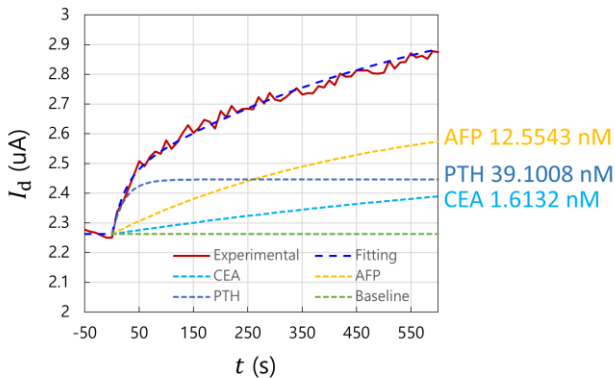**GFET #M8**

CEA 2 nM; AFP 20 nM; PTH 50 nM

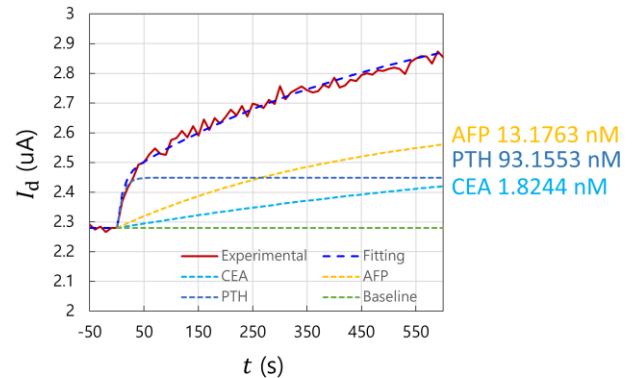

**GFET #M9**

CEA 2 nM; AFP 50 nM; PTH 2 nM

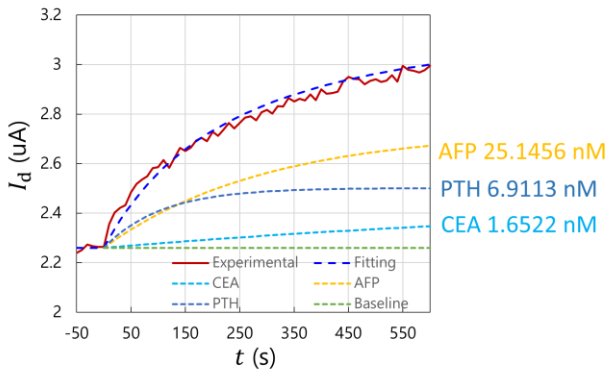**GFET #M10**

CEA 2 nM; AFP 50 nM; PTH 5 nM

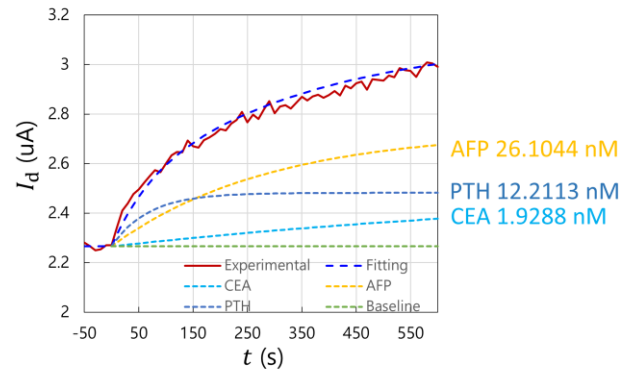**GFET #M11**

CEA 2 nM; AFP 50 nM; PTH 20 nM

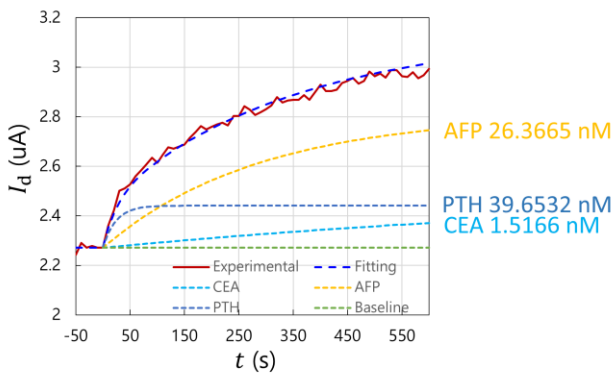**GFET #M12**

CEA 2 nM; AFP 50 nM; PTH 50 nM

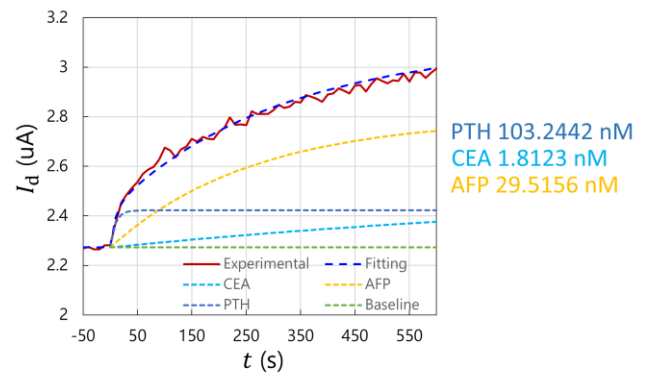**GFET #M13**

CEA 2 nM; AFP 100 nM; PTH 2 nM

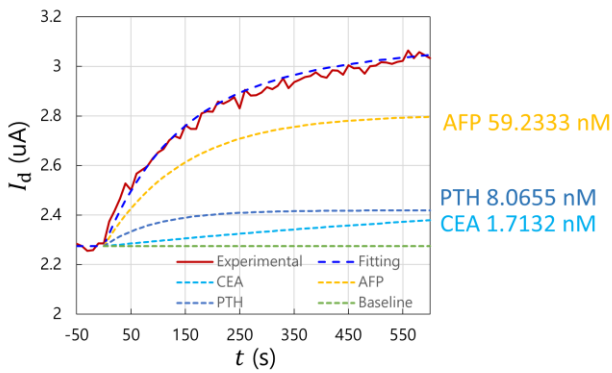**GFET #M14**

CEA 2 nM; AFP 100 nM; PTH 5 nM

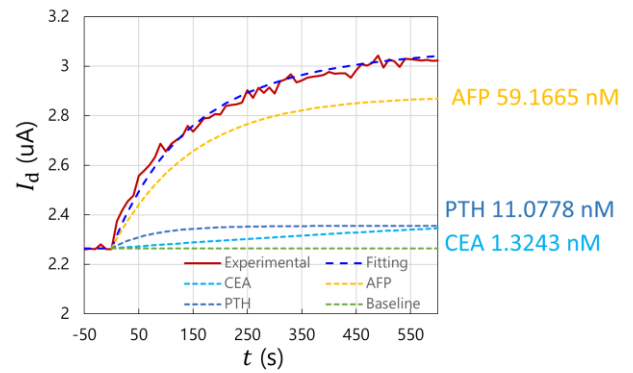**GFET #M15**

CEA 2 nM; AFP 100 nM; PTH 20 nM

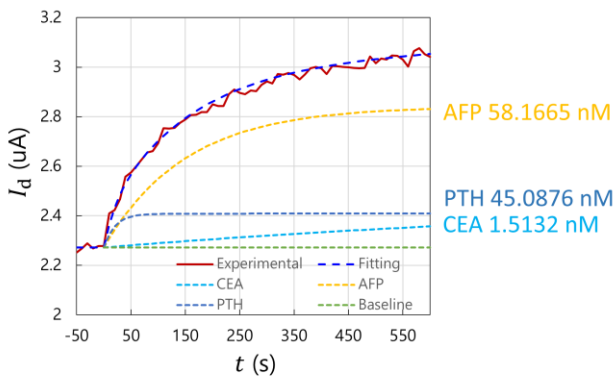**GFET #M16**

CEA 2 nM; AFP 100 nM; PTH 50 nM

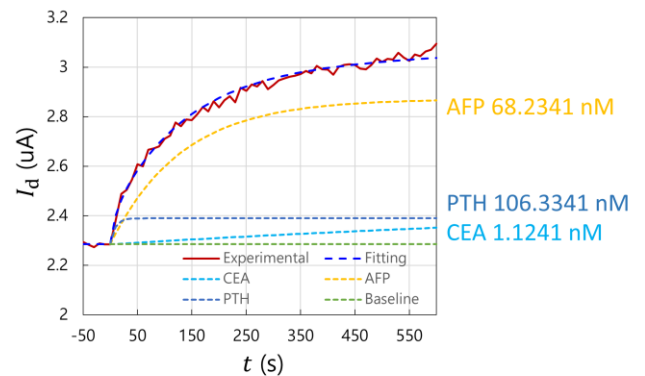

**GFET #M17**

CEA 5 nM; AFP 5 nM; PTH 2 nM

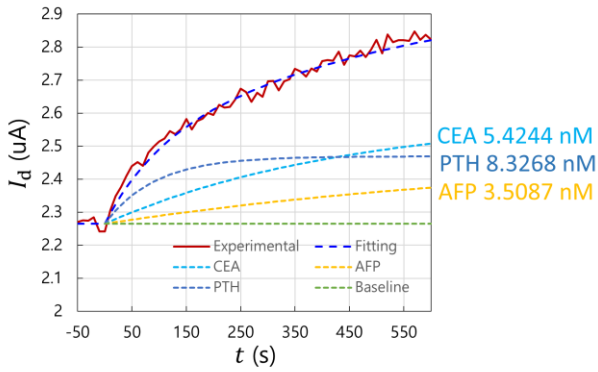**GFET #M18**

CEA 5 nM; AFP 5 nM; PTH 5 nM

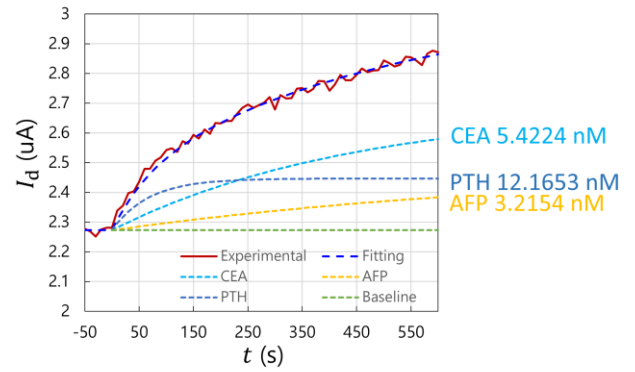**GFET #M19**

CEA 5 nM; AFP 5 nM; PTH 20 nM

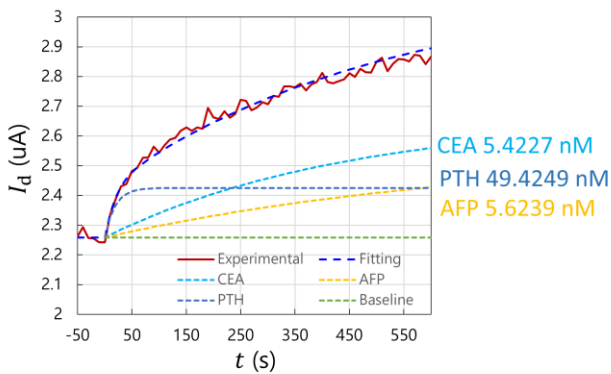**GFET #M20**

CEA 5 nM; AFP 5 nM; PTH 50 nM

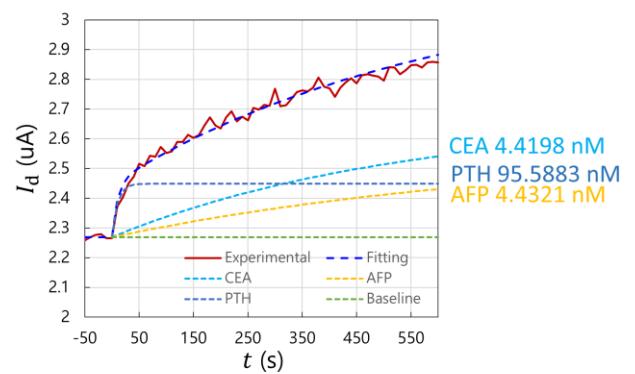**GFET #M21**

CEA 5 nM; AFP 20 nM; PTH 2 nM

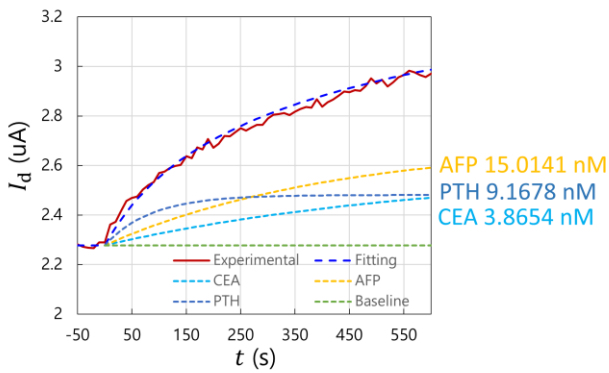**GFET #M22**

CEA 5 nM; AFP 20 nM; PTH 5 nM

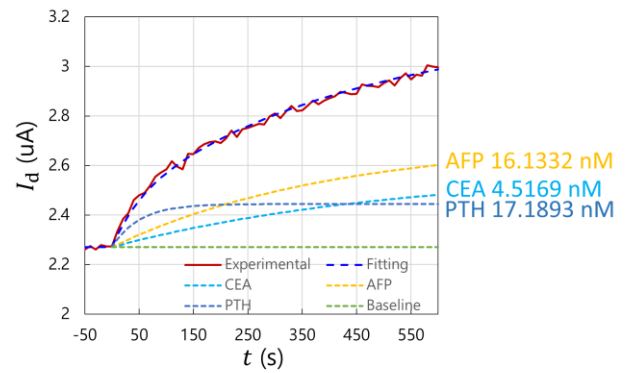**GFET #M23**

CEA 5 nM; AFP 20 nM; PTH 20 nM

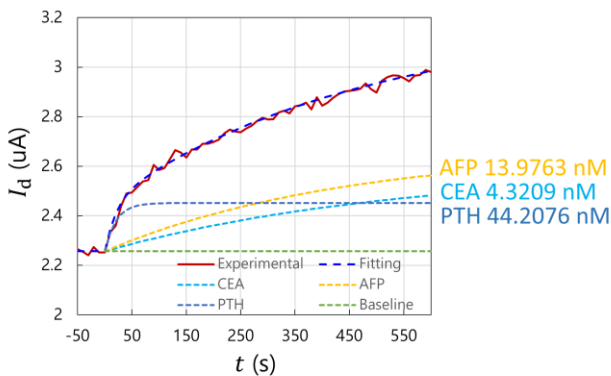**GFET #M24**

CEA 5 nM; AFP 20 nM; PTH 50 nM

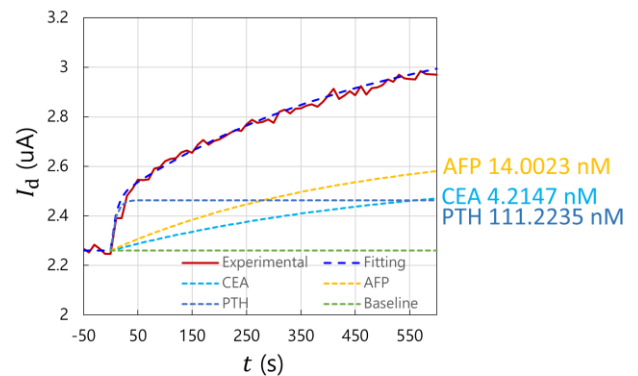



**GFET #M25**

CEA 5 nM; AFP 50 nM; PTH 2 nM

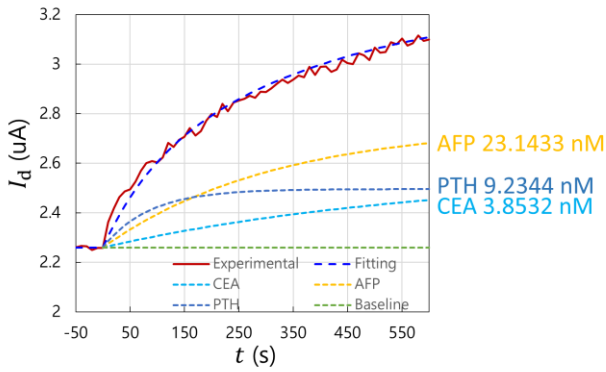**GFET #M26**

CEA 5 nM; AFP 50 nM; PTH 5 nM

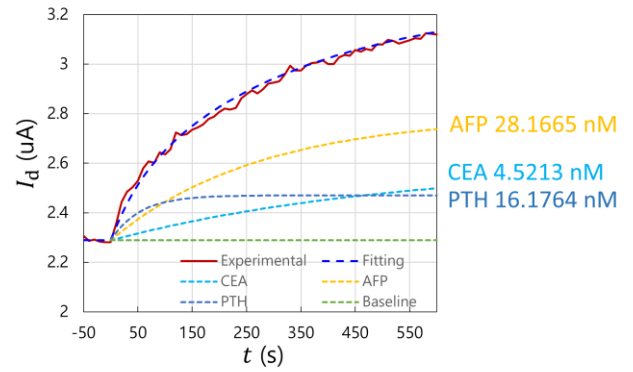**GFET #M27**

CEA 5 nM; AFP 50 nM; PTH 20 nM

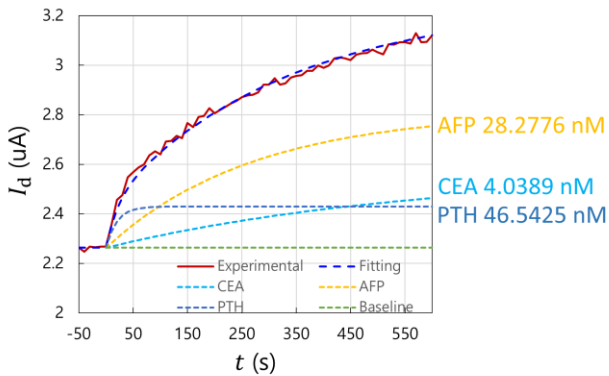**GFET #M28**

CEA 5 nM; AFP 50 nM; PTH 50 nM

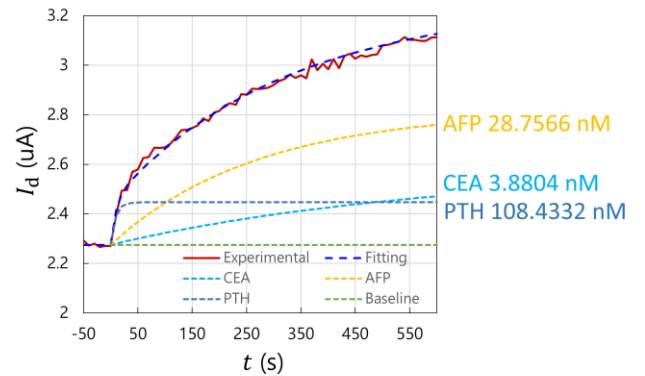**GFET #M29**

CEA 5 nM; AFP 100 nM; PTH 2 nM

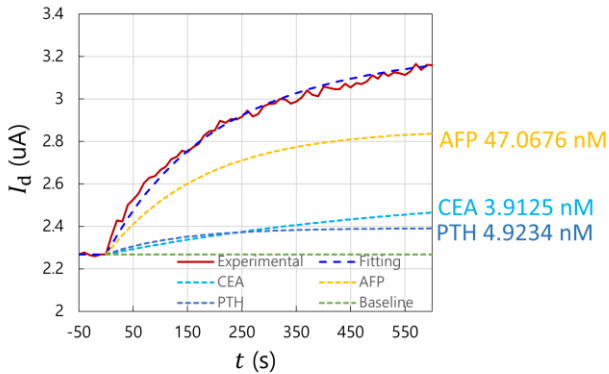**GFET #M30**

CEA 5 nM; AFP 100 nM; PTH 5 nM

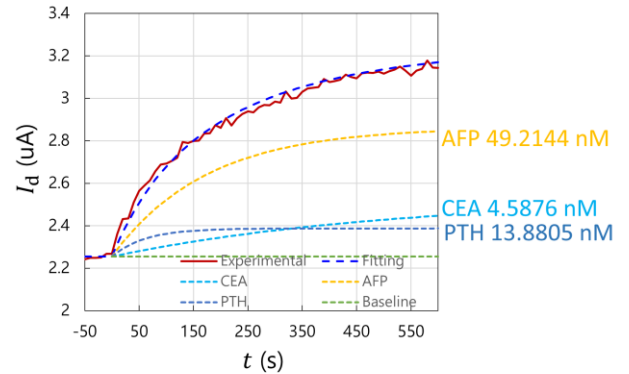**GFET #M31**

CEA 5 nM; AFP 100 nM; PTH 20 nM

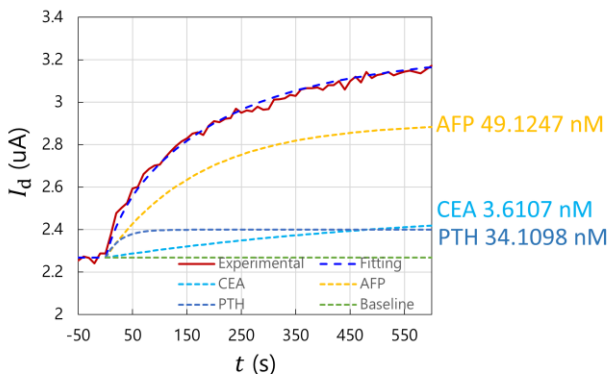**GFET #M32**

CEA 5 nM; AFP 100 nM; PTH 50 nM

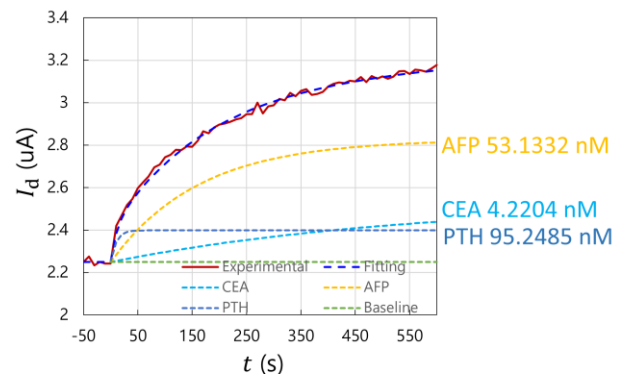

**GFET #M33**

CEA 20 nM; AFP 5 nM; PTH 2 nM

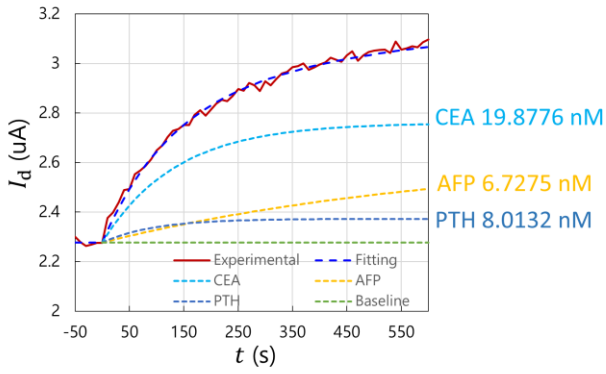**GFET #M34**

CEA 20 nM; AFP 5 nM; PTH 5 nM

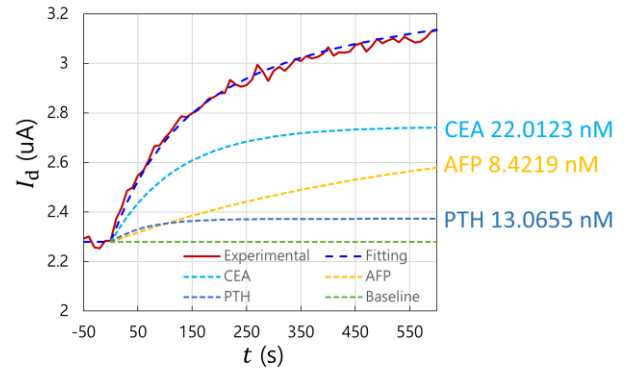**GFET #M35**

CEA 20 nM; AFP 5 nM; PTH 20 nM

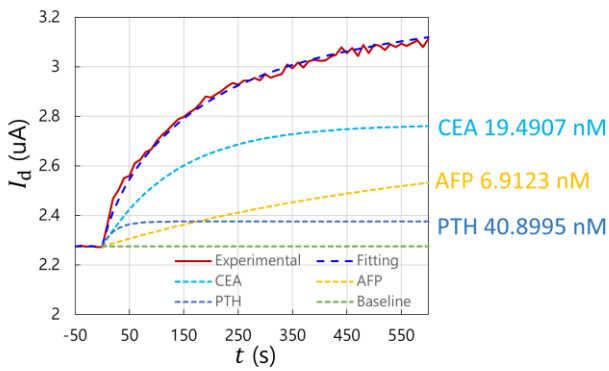**GFET #M36**

CEA 20 nM; AFP 5 nM; PTH 50 nM

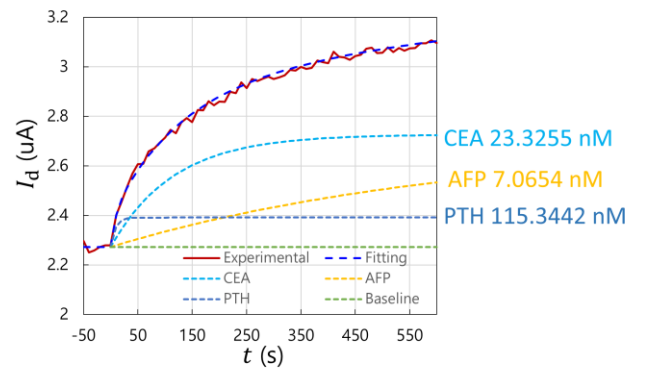**GFET #M37**

CEA 20 nM; AFP 20 nM; PTH 2 nM

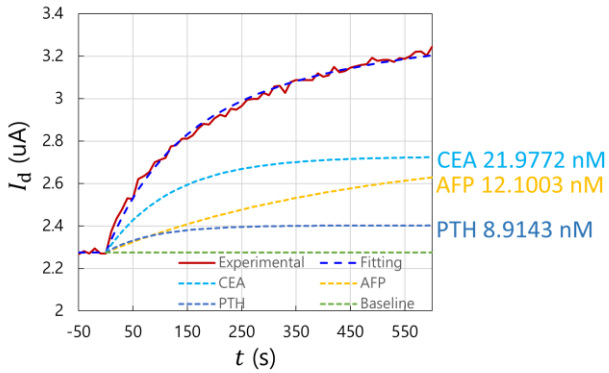**GFET #M38**

CEA 20 nM; AFP 20 nM; PTH 5 nM

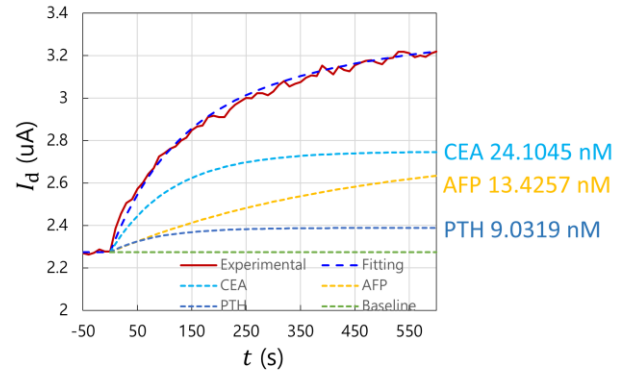**GFET #M39**

CEA 20 nM; AFP 20 nM; PTH 20 nM

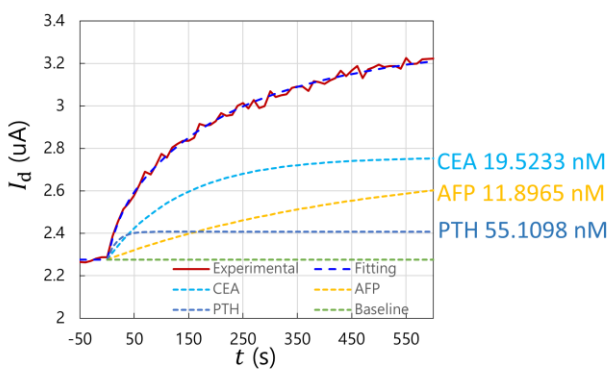**GFET #M40**

CEA 20 nM; AFP 20 nM; PTH 50 nM

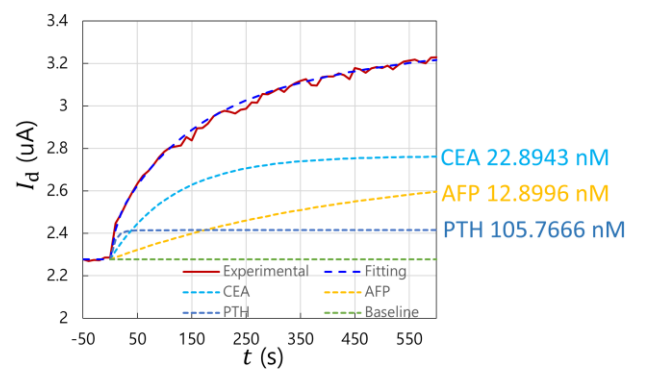

**GFET #M41**

CEA 20 nM; AFP 50 nM; PTH 2 nM

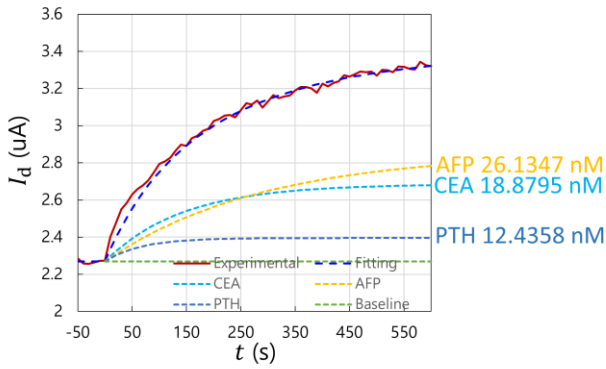**GFET #M42**

CEA 20 nM; AFP 50 nM; PTH 5 nM

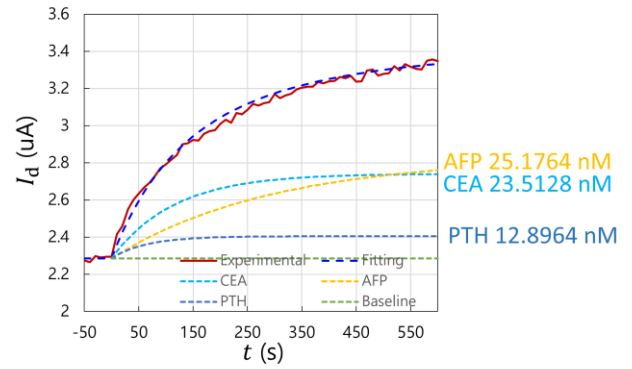**GFET #M43**

CEA 20 nM; AFP 50 nM; PTH 20 nM

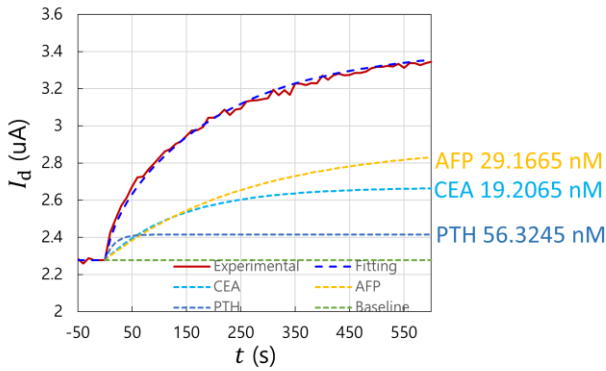**GFET #M44**

CEA 20 nM; AFP 50 nM; PTH 50 nM

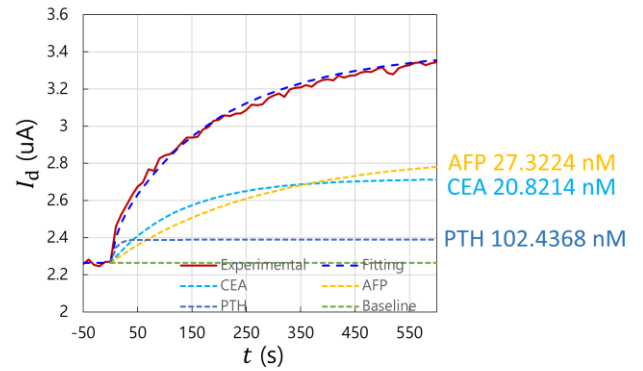**GFET #M45**

CEA 20 nM; AFP 100 nM; PTH 2 nM

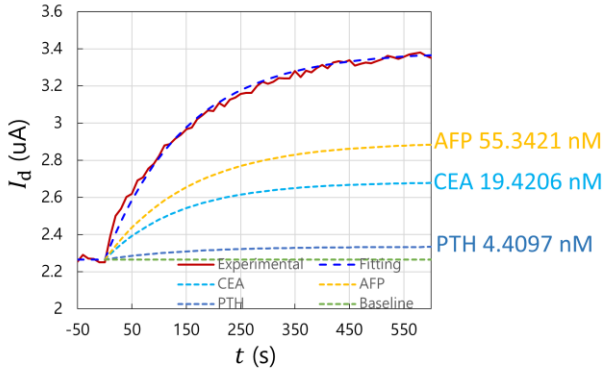**GFET #M46**

CEA 20 nM; AFP 100 nM; PTH 5 nM

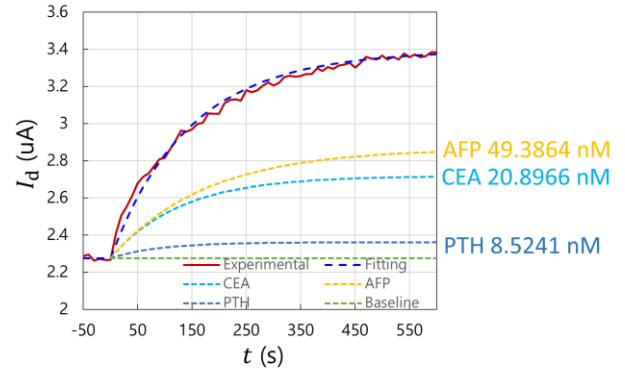**GFET #M47**

CEA 20 nM; AFP 100 nM; PTH 20 nM

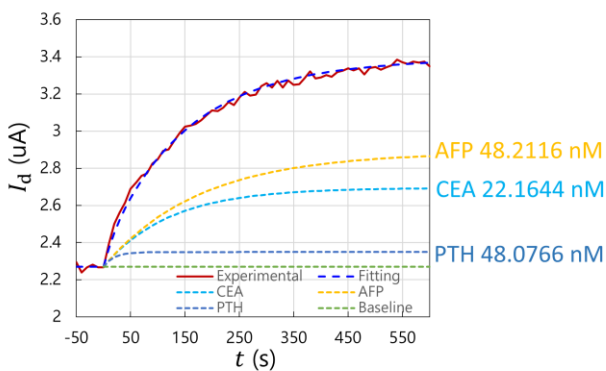**GFET #M48**

CEA 20 nM; AFP 100 nM; PTH 50 nM

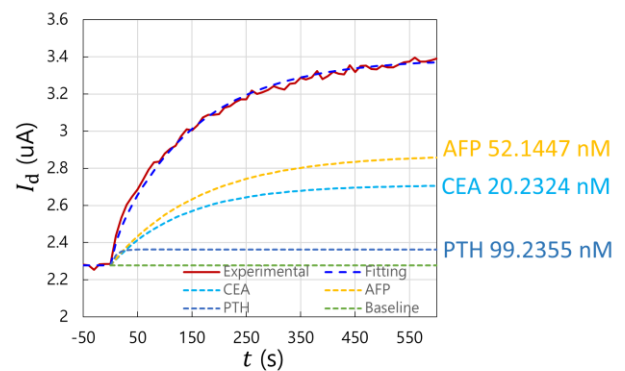

**GFET #M49**

CEA 50 nM; AFP 5 nM; PTH 2 nM

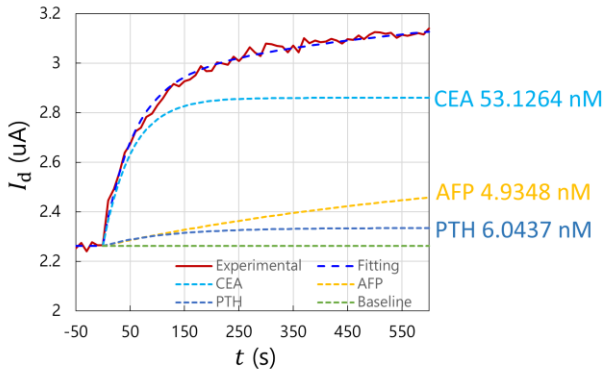**GFET #M50**

CEA 50 nM; AFP 5 nM; PTH 5 nM

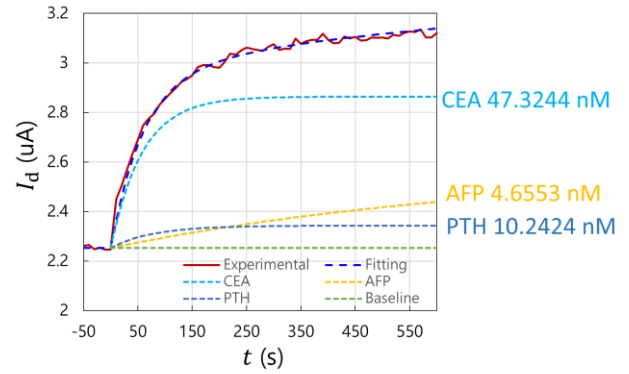**GFET #M51**

CEA 50 nM; AFP 5 nM; PTH 20 nM

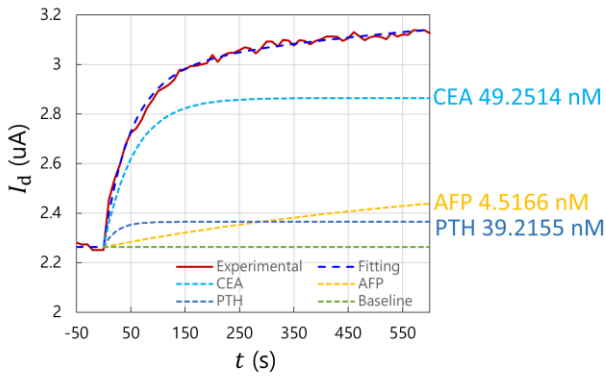**GFET #M52**

CEA 50 nM; AFP 5 nM; PTH 50 nM

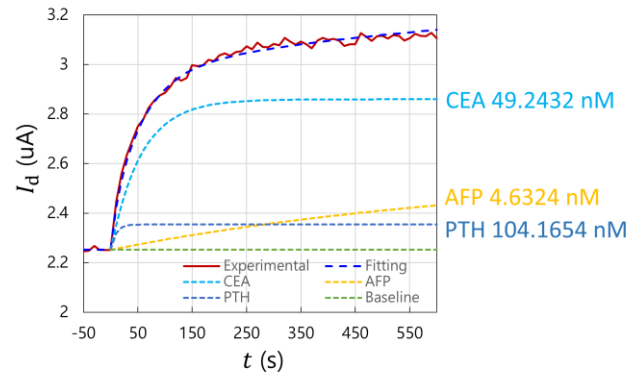**GFET #M53**

CEA 50 nM; AFP 20 nM; PTH 2 nM

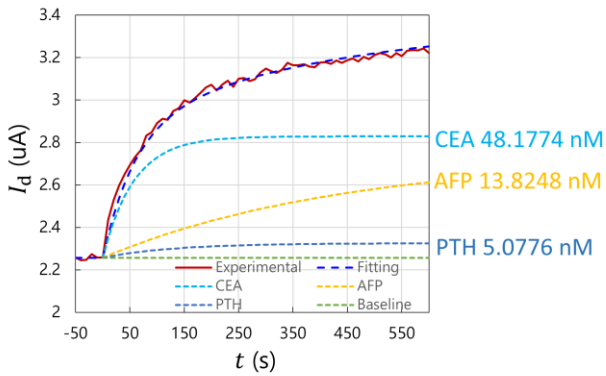**GFET #M54**

CEA 50 nM; AFP 20 nM; PTH 5 nM

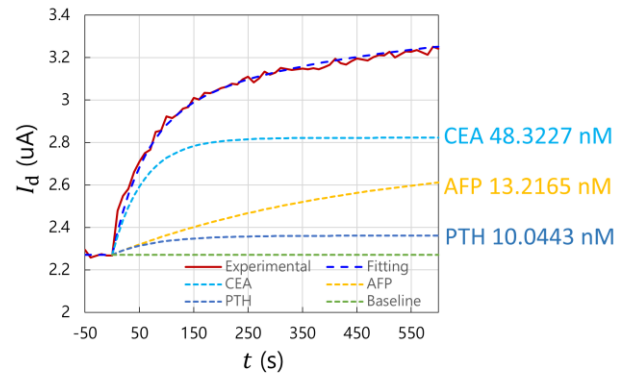**GFET #M55**

CEA 50 nM; AFP 20 nM; PTH 20 nM

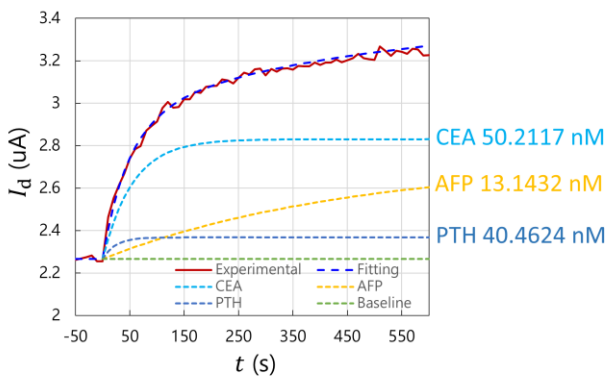**GFET #M56**

CEA 50 nM; AFP 20 nM; PTH 50 nM

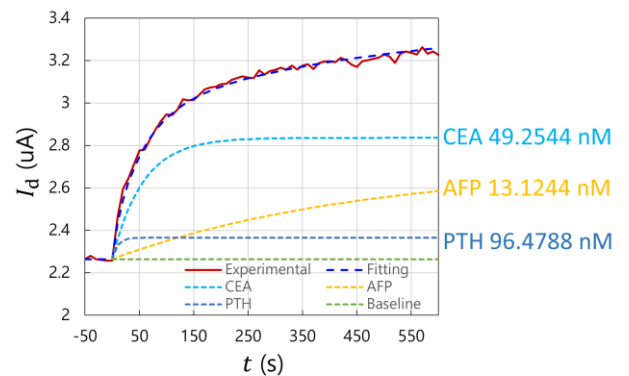

**GFET #M57**

CEA 50 nM; AFP 50 nM; PTH 2 nM

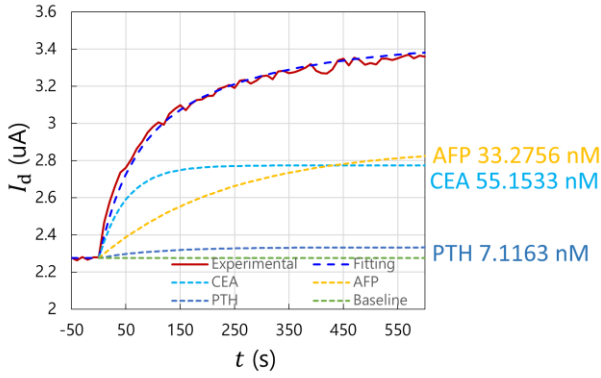**GFET #M58**

CEA 50 nM; AFP 50 nM; PTH 5 nM

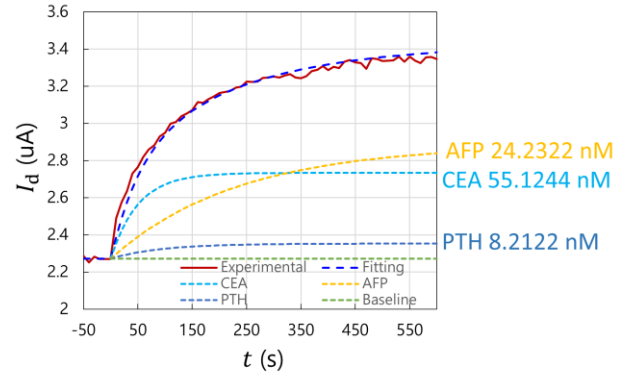**GFET #M59**

CEA 50 nM; AFP 50 nM; PTH 20 nM

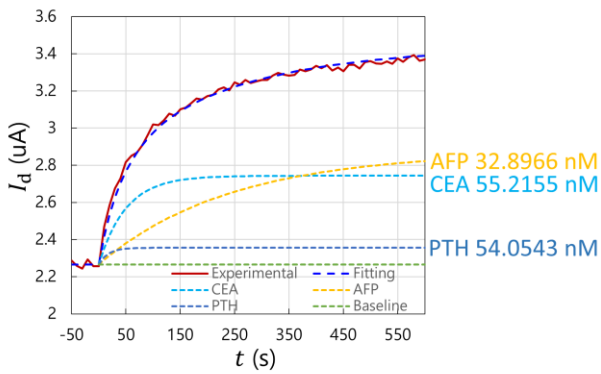**GFET #M60**

CEA 50 nM; AFP 50 nM; PTH 50 nM

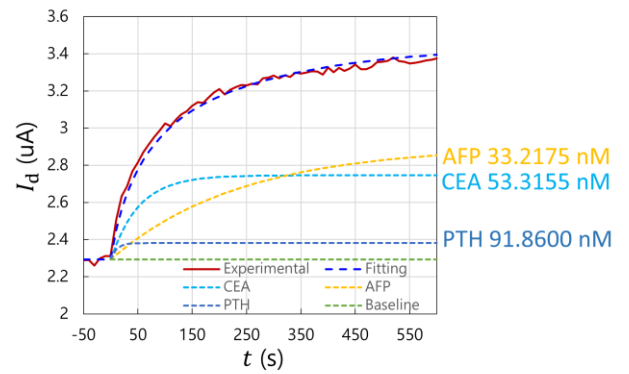**GFET #M61**

CEA 50 nM; AFP 100 nM; PTH 2 nM

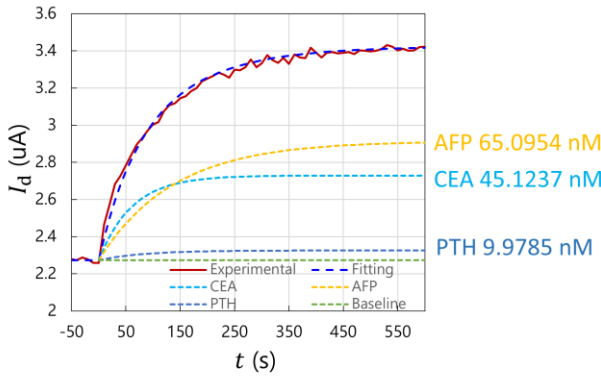**GFET #M62**

CEA 50 nM; AFP 100 nM; PTH 5 nM

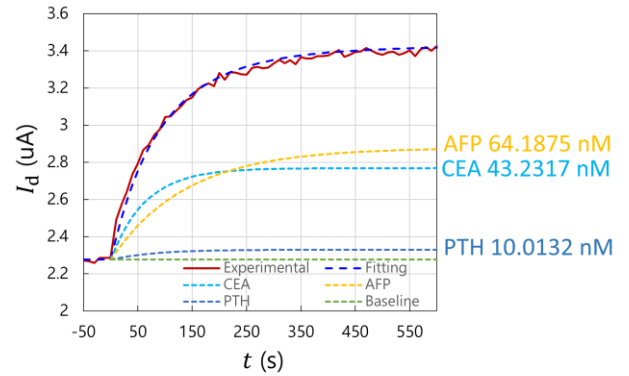**GFET #M63**

CEA 50 nM; AFP 100 nM; PTH 20 nM

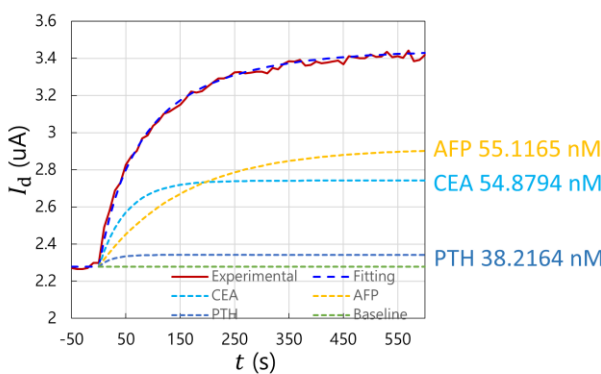**GFET #M64**

CEA 50 nM; AFP 100 nM; PTH 50 nM

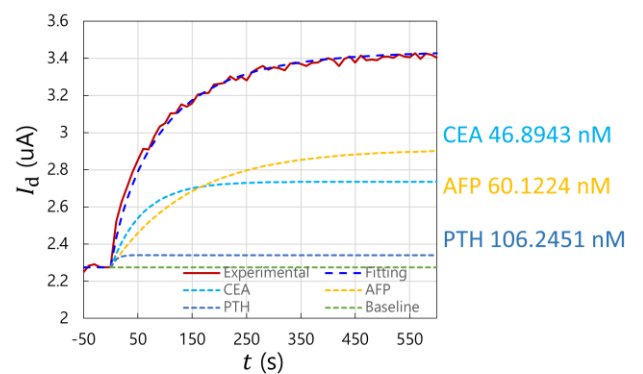**Figure S6.** Kinetic processes of 64 mixture samples in PBS.

**Table S10.** Kinetic processes of 64 mixture samples and numerical fitting results corresponding to **Figure S6**. The estimated kinetic parameters  $k_a^{(CEA)} = 357053.24 \text{ M}^{-1}\text{s}^{-1}$ ,  $k_d^{(CEA)} = 0.0003055 \text{ s}^{-1}$ ,  $k_a^{(AFP)} = 99465.16 \text{ M}^{-1}\text{s}^{-1}$ ,  $k_d^{(AFP)} = 0.0008749 \text{ s}^{-1}$ ,  $k_a^{(PTH)} = 1020100.24 \text{ M}^{-1}\text{s}^{-1}$  and  $k_d^{(PTH)} = 0.0023879 \text{ s}^{-1}$  are used as known conditions to estimate the component concentrations  $\tilde{c}^{(CEA)}$ ,  $\tilde{c}^{(AFP)}$  and  $\tilde{c}^{(PTH)}$ .

| Device number | Mixture components                                                                     | Time, $t$ (s) | Exp. Results, $I_d$ ( $\mu\text{A}$ ) | Fitting results                 |                               |                       |                       |                       |                                                                                                                                                 |
|---------------|----------------------------------------------------------------------------------------|---------------|---------------------------------------|---------------------------------|-------------------------------|-----------------------|-----------------------|-----------------------|-------------------------------------------------------------------------------------------------------------------------------------------------|
|               |                                                                                        |               |                                       | $\tilde{I}_d$ ( $\mu\text{A}$ ) | Component contributions       |                       |                       |                       | Estimated conc. of components                                                                                                                   |
|               |                                                                                        |               |                                       |                                 | DC baseline ( $\mu\text{A}$ ) | CEA ( $\mu\text{A}$ ) | AFP ( $\mu\text{A}$ ) | PTH ( $\mu\text{A}$ ) |                                                                                                                                                 |
| GFET #M1      | $c^{(CEA)} = 2 \text{ nM}$<br>$c^{(AFP)} = 5 \text{ nM}$<br>$c^{(PTH)} = 2 \text{ nM}$ | -50           | 2.266                                 | 2.262                           | -                             | -                     | -                     | -                     | $\tilde{c}^{(CEA)} \approx 2.0675 \text{ nM}$<br>$\tilde{c}^{(AFP)} \approx 3.9617 \text{ nM}$<br>$\tilde{c}^{(PTH)} \approx 9.3055 \text{ nM}$ |
|               |                                                                                        | -40           | 2.280                                 | 2.262                           |                               |                       |                       |                       |                                                                                                                                                 |
|               |                                                                                        | -30           | 2.272                                 | 2.262                           |                               |                       |                       |                       |                                                                                                                                                 |
|               |                                                                                        | -20           | 2.273                                 | 2.262                           |                               |                       |                       |                       |                                                                                                                                                 |
|               |                                                                                        | -10           | 2.240                                 | 2.262                           |                               |                       |                       |                       |                                                                                                                                                 |
|               |                                                                                        | 0             | 2.240                                 | 2.262                           | 2.262                         | 0.000                 | 0.000                 | 0.000                 |                                                                                                                                                 |
|               |                                                                                        | 10            | 2.304                                 | 2.289                           | 2.262                         | 0.003                 | 0.003                 | 0.021                 |                                                                                                                                                 |
|               |                                                                                        | 20            | 2.356                                 | 2.315                           | 2.262                         | 0.007                 | 0.006                 | 0.040                 |                                                                                                                                                 |
|               |                                                                                        | 30            | 2.347                                 | 2.338                           | 2.262                         | 0.010                 | 0.009                 | 0.057                 |                                                                                                                                                 |
|               |                                                                                        | 40            | 2.401                                 | 2.359                           | 2.262                         | 0.014                 | 0.011                 | 0.072                 |                                                                                                                                                 |
|               |                                                                                        | 50            | 2.390                                 | 2.378                           | 2.262                         | 0.017                 | 0.014                 | 0.086                 |                                                                                                                                                 |
|               |                                                                                        | 60            | 2.412                                 | 2.396                           | 2.262                         | 0.020                 | 0.017                 | 0.097                 |                                                                                                                                                 |
|               |                                                                                        | 70            | 2.454                                 | 2.413                           | 2.262                         | 0.023                 | 0.020                 | 0.108                 |                                                                                                                                                 |
|               |                                                                                        | 80            | 2.465                                 | 2.428                           | 2.262                         | 0.027                 | 0.022                 | 0.117                 |                                                                                                                                                 |
|               |                                                                                        | 90            | 2.455                                 | 2.442                           | 2.262                         | 0.030                 | 0.025                 | 0.126                 |                                                                                                                                                 |
|               |                                                                                        | 100           | 2.463                                 | 2.455                           | 2.262                         | 0.033                 | 0.028                 | 0.133                 |                                                                                                                                                 |
|               |                                                                                        | 110           | 2.492                                 | 2.467                           | 2.262                         | 0.036                 | 0.030                 | 0.139                 |                                                                                                                                                 |
|               |                                                                                        | 120           | 2.462                                 | 2.479                           | 2.262                         | 0.039                 | 0.033                 | 0.145                 |                                                                                                                                                 |
|               |                                                                                        | 130           | 2.486                                 | 2.489                           | 2.262                         | 0.042                 | 0.035                 | 0.150                 |                                                                                                                                                 |
|               |                                                                                        | 140           | 2.518                                 | 2.499                           | 2.262                         | 0.045                 | 0.038                 | 0.155                 |                                                                                                                                                 |
|               |                                                                                        | 150           | 2.527                                 | 2.509                           | 2.262                         | 0.048                 | 0.040                 | 0.159                 |                                                                                                                                                 |
|               |                                                                                        | 160           | 2.522                                 | 2.518                           | 2.262                         | 0.051                 | 0.042                 | 0.163                 |                                                                                                                                                 |
|               |                                                                                        | 170           | 2.523                                 | 2.526                           | 2.262                         | 0.054                 | 0.045                 | 0.166                 |                                                                                                                                                 |
|               |                                                                                        | 180           | 2.525                                 | 2.535                           | 2.262                         | 0.057                 | 0.047                 | 0.169                 |                                                                                                                                                 |
|               |                                                                                        | 190           | 2.551                                 | 2.542                           | 2.262                         | 0.060                 | 0.050                 | 0.171                 |                                                                                                                                                 |
|               |                                                                                        | 200           | 2.547                                 | 2.550                           | 2.262                         | 0.063                 | 0.052                 | 0.173                 |                                                                                                                                                 |
|               |                                                                                        | 210           | 2.541                                 | 2.557                           | 2.262                         | 0.066                 | 0.054                 | 0.175                 |                                                                                                                                                 |
|               |                                                                                        | 220           | 2.580                                 | 2.563                           | 2.262                         | 0.068                 | 0.056                 | 0.177                 |                                                                                                                                                 |
|               |                                                                                        | 230           | 2.552                                 | 2.570                           | 2.262                         | 0.071                 | 0.058                 | 0.179                 |                                                                                                                                                 |
|               |                                                                                        | 240           | 2.566                                 | 2.576                           | 2.262                         | 0.074                 | 0.061                 | 0.180                 |                                                                                                                                                 |
|               |                                                                                        | 250           | 2.557                                 | 2.582                           | 2.262                         | 0.077                 | 0.063                 | 0.181                 |                                                                                                                                                 |
|               |                                                                                        | 260           | 2.618                                 | 2.588                           | 2.262                         | 0.079                 | 0.065                 | 0.182                 |                                                                                                                                                 |
|               |                                                                                        | 270           | 2.578                                 | 2.594                           | 2.262                         | 0.082                 | 0.067                 | 0.183                 |                                                                                                                                                 |
|               |                                                                                        | 280           | 2.620                                 | 2.599                           | 2.262                         | 0.085                 | 0.069                 | 0.184                 |                                                                                                                                                 |
|               |                                                                                        | 290           | 2.610                                 | 2.605                           | 2.262                         | 0.087                 | 0.071                 | 0.185                 |                                                                                                                                                 |
|               |                                                                                        | 300           | 2.599                                 | 2.610                           | 2.262                         | 0.090                 | 0.073                 | 0.186                 |                                                                                                                                                 |
|               |                                                                                        | 310           | 2.624                                 | 2.615                           | 2.262                         | 0.092                 | 0.075                 | 0.186                 |                                                                                                                                                 |
|               |                                                                                        | 320           | 2.617                                 | 2.620                           | 2.262                         | 0.095                 | 0.077                 | 0.187                 |                                                                                                                                                 |
|               |                                                                                        | 330           | 2.622                                 | 2.625                           | 2.262                         | 0.097                 | 0.079                 | 0.187                 |                                                                                                                                                 |
|               |                                                                                        | 340           | 2.629                                 | 2.630                           | 2.262                         | 0.100                 | 0.081                 | 0.188                 |                                                                                                                                                 |
|               |                                                                                        | 350           | 2.615                                 | 2.635                           | 2.262                         | 0.102                 | 0.083                 | 0.188                 |                                                                                                                                                 |
|               |                                                                                        | 360           | 2.629                                 | 2.639                           | 2.262                         | 0.104                 | 0.085                 | 0.188                 |                                                                                                                                                 |
|               |                                                                                        | 370           | 2.661                                 | 2.644                           | 2.262                         | 0.107                 | 0.087                 | 0.189                 |                                                                                                                                                 |
|               |                                                                                        | 380           | 2.653                                 | 2.648                           | 2.262                         | 0.109                 | 0.088                 | 0.189                 |                                                                                                                                                 |
| 390           | 2.643                                                                                  | 2.653         | 2.262                                 | 0.112                           | 0.090                         | 0.189                 |                       |                       |                                                                                                                                                 |
| 400           | 2.637                                                                                  | 2.657         | 2.262                                 | 0.114                           | 0.092                         | 0.189                 |                       |                       |                                                                                                                                                 |
| 410           | 2.673                                                                                  | 2.661         | 2.262                                 | 0.116                           | 0.094                         | 0.190                 |                       |                       |                                                                                                                                                 |
| 420           | 2.667                                                                                  | 2.665         | 2.262                                 | 0.118                           | 0.095                         | 0.190                 |                       |                       |                                                                                                                                                 |
| 430           | 2.673                                                                                  | 2.669         | 2.262                                 | 0.121                           | 0.097                         | 0.190                 |                       |                       |                                                                                                                                                 |
| 440           | 2.669                                                                                  | 2.673         | 2.262                                 | 0.123                           | 0.099                         | 0.190                 |                       |                       |                                                                                                                                                 |

|             |                       |       |       |       |       |       |       |                                      |                                     |
|-------------|-----------------------|-------|-------|-------|-------|-------|-------|--------------------------------------|-------------------------------------|
|             |                       | 450   | 2.685 | 2.677 | 2.262 | 0.125 | 0.101 | 0.190                                |                                     |
|             |                       | 460   | 2.652 | 2.681 | 2.262 | 0.127 | 0.102 | 0.190                                |                                     |
|             |                       | 470   | 2.696 | 2.685 | 2.262 | 0.129 | 0.104 | 0.190                                |                                     |
|             |                       | 480   | 2.682 | 2.689 | 2.262 | 0.131 | 0.105 | 0.191                                |                                     |
|             |                       | 490   | 2.707 | 2.693 | 2.262 | 0.134 | 0.107 | 0.191                                |                                     |
|             |                       | 500   | 2.684 | 2.696 | 2.262 | 0.136 | 0.109 | 0.191                                |                                     |
|             |                       | 510   | 2.680 | 2.700 | 2.262 | 0.138 | 0.110 | 0.191                                |                                     |
|             |                       | 520   | 2.701 | 2.704 | 2.262 | 0.140 | 0.112 | 0.191                                |                                     |
|             |                       | 530   | 2.742 | 2.707 | 2.262 | 0.142 | 0.113 | 0.191                                |                                     |
|             |                       | 540   | 2.699 | 2.711 | 2.262 | 0.144 | 0.115 | 0.191                                |                                     |
|             |                       | 550   | 2.718 | 2.714 | 2.262 | 0.146 | 0.116 | 0.191                                |                                     |
|             |                       | 560   | 2.688 | 2.718 | 2.262 | 0.148 | 0.118 | 0.191                                |                                     |
|             |                       | 570   | 2.730 | 2.721 | 2.262 | 0.150 | 0.119 | 0.191                                |                                     |
|             |                       | 580   | 2.719 | 2.724 | 2.262 | 0.151 | 0.120 | 0.191                                |                                     |
|             |                       | 590   | 2.733 | 2.728 | 2.262 | 0.153 | 0.122 | 0.191                                |                                     |
|             |                       | 600   | 2.698 | 2.731 | 2.262 | 0.155 | 0.123 | 0.191                                |                                     |
| GFET<br>#M2 | $c^{(CEA)} = 2$<br>nM | -50   | 2.256 | 2.272 | -     | -     | -     | -                                    | $\bar{c}^{(CEA)} \approx 2.1254$ nM |
|             |                       | -40   | 2.270 | 2.272 |       |       |       |                                      |                                     |
|             |                       | -30   | 2.254 | 2.272 |       |       |       |                                      |                                     |
|             |                       | -20   | 2.264 | 2.272 |       |       |       |                                      |                                     |
|             |                       | -10   | 2.294 | 2.272 |       |       |       |                                      |                                     |
|             | 0                     | 2.294 | 2.272 | 2.272 | 0.000 | 0.000 | 0.000 |                                      |                                     |
|             | 10                    | 2.298 | 2.307 | 2.272 | 0.004 | 0.003 | 0.028 |                                      |                                     |
|             | 20                    | 2.351 | 2.337 | 2.272 | 0.007 | 0.006 | 0.052 |                                      |                                     |
|             | 30                    | 2.363 | 2.363 | 2.272 | 0.010 | 0.009 | 0.072 |                                      |                                     |
|             | 40                    | 2.398 | 2.386 | 2.272 | 0.014 | 0.012 | 0.088 |                                      |                                     |
|             | 50                    | 2.429 | 2.406 | 2.272 | 0.017 | 0.014 | 0.102 |                                      |                                     |
|             | 60                    | 2.429 | 2.424 | 2.272 | 0.021 | 0.017 | 0.114 |                                      |                                     |
|             | 70                    | 2.428 | 2.440 | 2.272 | 0.024 | 0.020 | 0.124 |                                      |                                     |
|             | 80                    | 2.449 | 2.454 | 2.272 | 0.027 | 0.023 | 0.132 |                                      |                                     |
|             | 90                    | 2.464 | 2.467 | 2.272 | 0.030 | 0.025 | 0.139 |                                      |                                     |
|             | 100                   | 2.463 | 2.478 | 2.272 | 0.034 | 0.028 | 0.145 |                                      |                                     |
|             | 110                   | 2.482 | 2.489 | 2.272 | 0.037 | 0.031 | 0.150 | $\bar{c}^{(AFP)} \approx 4.0677$ nM  |                                     |
|             | 120                   | 2.511 | 2.499 | 2.272 | 0.040 | 0.033 | 0.154 |                                      |                                     |
|             | 130                   | 2.506 | 2.508 | 2.272 | 0.043 | 0.036 | 0.157 | $\bar{c}^{(PTH)} \approx 14.8769$ nM |                                     |
|             | 140                   | 2.512 | 2.516 | 2.272 | 0.046 | 0.038 | 0.160 |                                      |                                     |
|             | 150                   | 2.531 | 2.524 | 2.272 | 0.049 | 0.041 | 0.162 |                                      |                                     |
|             | 160                   | 2.531 | 2.532 | 2.272 | 0.052 | 0.043 | 0.164 |                                      |                                     |
|             | 170                   | 2.539 | 2.539 | 2.272 | 0.055 | 0.046 | 0.166 |                                      |                                     |
|             | 180                   | 2.543 | 2.546 | 2.272 | 0.058 | 0.048 | 0.168 |                                      |                                     |
|             | 190                   | 2.555 | 2.552 | 2.272 | 0.061 | 0.050 | 0.169 |                                      |                                     |
|             | 200                   | 2.555 | 2.558 | 2.272 | 0.064 | 0.053 | 0.170 |                                      |                                     |
|             | 210                   | 2.557 | 2.564 | 2.272 | 0.067 | 0.055 | 0.171 |                                      |                                     |
|             | 220                   | 2.571 | 2.570 | 2.272 | 0.070 | 0.057 | 0.171 |                                      |                                     |
| 230         | 2.578                 | 2.576 | 2.272 | 0.072 | 0.060 | 0.172 |       |                                      |                                     |
| 240         | 2.579                 | 2.581 | 2.272 | 0.075 | 0.062 | 0.172 |       |                                      |                                     |
| 250         | 2.597                 | 2.586 | 2.272 | 0.078 | 0.064 | 0.173 |       |                                      |                                     |
| 260         | 2.593                 | 2.592 | 2.272 | 0.081 | 0.066 | 0.173 |       |                                      |                                     |
| 270         | 2.607                 | 2.597 | 2.272 | 0.083 | 0.068 | 0.173 |       |                                      |                                     |
| 280         | 2.603                 | 2.602 | 2.272 | 0.086 | 0.070 | 0.174 |       |                                      |                                     |

|             |                        |       |       |       |       |       |       |                                       |                                       |                                        |
|-------------|------------------------|-------|-------|-------|-------|-------|-------|---------------------------------------|---------------------------------------|----------------------------------------|
|             |                        | 290   | 2.614 | 2.607 | 2.272 | 0.089 | 0.072 | 0.174                                 |                                       |                                        |
|             |                        | 300   | 2.601 | 2.612 | 2.272 | 0.091 | 0.074 | 0.174                                 |                                       |                                        |
|             |                        | 310   | 2.614 | 2.616 | 2.272 | 0.094 | 0.076 | 0.174                                 |                                       |                                        |
|             |                        | 320   | 2.620 | 2.621 | 2.272 | 0.096 | 0.078 | 0.174                                 |                                       |                                        |
|             |                        | 330   | 2.613 | 2.625 | 2.272 | 0.099 | 0.080 | 0.174                                 |                                       |                                        |
|             |                        | 340   | 2.625 | 2.630 | 2.272 | 0.101 | 0.082 | 0.174                                 |                                       |                                        |
|             |                        | 350   | 2.666 | 2.634 | 2.272 | 0.104 | 0.084 | 0.175                                 |                                       |                                        |
|             |                        | 360   | 2.638 | 2.639 | 2.272 | 0.106 | 0.086 | 0.175                                 |                                       |                                        |
|             |                        | 370   | 2.651 | 2.643 | 2.272 | 0.109 | 0.088 | 0.175                                 |                                       |                                        |
|             |                        | 380   | 2.627 | 2.647 | 2.272 | 0.111 | 0.090 | 0.175                                 |                                       |                                        |
|             |                        | 390   | 2.657 | 2.652 | 2.272 | 0.113 | 0.092 | 0.175                                 |                                       |                                        |
|             |                        | 400   | 2.630 | 2.656 | 2.272 | 0.116 | 0.094 | 0.175                                 |                                       |                                        |
|             |                        | 410   | 2.626 | 2.660 | 2.272 | 0.118 | 0.095 | 0.175                                 |                                       |                                        |
|             |                        | 420   | 2.652 | 2.664 | 2.272 | 0.120 | 0.097 | 0.175                                 |                                       |                                        |
|             |                        | 430   | 2.654 | 2.668 | 2.272 | 0.122 | 0.099 | 0.175                                 |                                       |                                        |
|             |                        | 440   | 2.666 | 2.672 | 2.272 | 0.125 | 0.100 | 0.175                                 |                                       |                                        |
|             |                        | 450   | 2.666 | 2.676 | 2.272 | 0.127 | 0.102 | 0.175                                 |                                       |                                        |
|             |                        | 460   | 2.694 | 2.680 | 2.272 | 0.129 | 0.104 | 0.175                                 |                                       |                                        |
|             |                        | 470   | 2.702 | 2.684 | 2.272 | 0.131 | 0.106 | 0.175                                 |                                       |                                        |
|             |                        | 480   | 2.700 | 2.687 | 2.272 | 0.133 | 0.107 | 0.175                                 |                                       |                                        |
|             |                        | 490   | 2.688 | 2.691 | 2.272 | 0.135 | 0.109 | 0.175                                 |                                       |                                        |
|             |                        | 500   | 2.710 | 2.695 | 2.272 | 0.138 | 0.110 | 0.175                                 |                                       |                                        |
|             |                        | 510   | 2.701 | 2.698 | 2.272 | 0.140 | 0.112 | 0.175                                 |                                       |                                        |
|             |                        | 520   | 2.681 | 2.702 | 2.272 | 0.142 | 0.113 | 0.175                                 |                                       |                                        |
|             |                        | 530   | 2.712 | 2.706 | 2.272 | 0.144 | 0.115 | 0.175                                 |                                       |                                        |
|             |                        | 540   | 2.720 | 2.709 | 2.272 | 0.146 | 0.116 | 0.175                                 |                                       |                                        |
|             |                        | 550   | 2.691 | 2.713 | 2.272 | 0.148 | 0.118 | 0.175                                 |                                       |                                        |
|             |                        | 560   | 2.693 | 2.716 | 2.272 | 0.150 | 0.119 | 0.175                                 |                                       |                                        |
|             |                        | 570   | 2.728 | 2.719 | 2.272 | 0.152 | 0.121 | 0.175                                 |                                       |                                        |
|             |                        | 580   | 2.706 | 2.723 | 2.272 | 0.154 | 0.122 | 0.175                                 |                                       |                                        |
|             |                        | 590   | 2.697 | 2.726 | 2.272 | 0.155 | 0.124 | 0.175                                 |                                       |                                        |
|             |                        | 600   | 2.711 | 2.729 | 2.272 | 0.157 | 0.125 | 0.175                                 |                                       |                                        |
| GFET<br>#M3 | $c^{(CEA)} = 2$<br>nM  | -50   | 2.260 | 2.273 | -     | -     | -     | -                                     | $\tilde{c}^{(CEA)} \approx 0.9542$ nM |                                        |
|             |                        | -40   | 2.286 | 2.273 |       |       |       |                                       |                                       |                                        |
|             |                        | -30   | 2.289 | 2.273 |       |       |       |                                       |                                       |                                        |
|             |                        | -20   | 2.272 | 2.273 |       |       |       |                                       |                                       |                                        |
|             |                        | -10   | 2.265 | 2.273 |       |       |       |                                       |                                       |                                        |
|             | 0                      | 2.265 | 2.273 | 2.273 | 0.000 | 0.000 | 0.000 | $\tilde{c}^{(AFP)} \approx 6.8123$ nM |                                       |                                        |
|             | $c^{(AFP)} = 5$<br>nM  | 10    | 2.289 | 2.352 | 2.273 | 0.001 | 0.005 |                                       | 0.073                                 |                                        |
|             |                        | 20    | 2.347 | 2.405 | 2.273 | 0.003 | 0.010 |                                       | 0.120                                 |                                        |
|             |                        | 30    | 2.408 | 2.440 | 2.273 | 0.004 | 0.015 |                                       | 0.148                                 |                                        |
|             | $c^{(PTH)} = 20$<br>nM | 40    | 2.435 | 2.464 | 2.273 | 0.005 | 0.019 |                                       | 0.167                                 | $\tilde{c}^{(PTH)} \approx 43.2775$ nM |
|             |                        | 50    | 2.435 | 2.482 | 2.273 | 0.007 | 0.024 |                                       | 0.178                                 |                                        |
|             |                        | 60    | 2.450 | 2.495 | 2.273 | 0.008 | 0.029 |                                       | 0.185                                 |                                        |
|             |                        | 70    | 2.523 | 2.505 | 2.273 | 0.009 | 0.033 |                                       | 0.190                                 |                                        |
| 80          |                        | 2.506 | 2.514 | 2.273 | 0.011 | 0.038 | 0.193 |                                       |                                       |                                        |



|     |       |       |       |       |       |       |
|-----|-------|-------|-------|-------|-------|-------|
| 90  | 2.495 | 2.521 | 2.273 | 0.012 | 0.042 | 0.194 |
| 100 | 2.493 | 2.528 | 2.273 | 0.013 | 0.046 | 0.195 |
| 110 | 2.509 | 2.534 | 2.273 | 0.015 | 0.051 | 0.196 |
| 120 | 2.549 | 2.540 | 2.273 | 0.016 | 0.055 | 0.197 |
| 130 | 2.562 | 2.546 | 2.273 | 0.017 | 0.059 | 0.197 |
| 140 | 2.557 | 2.551 | 2.273 | 0.018 | 0.063 | 0.197 |
| 150 | 2.578 | 2.556 | 2.273 | 0.020 | 0.067 | 0.197 |
| 160 | 2.553 | 2.562 | 2.273 | 0.021 | 0.071 | 0.197 |
| 170 | 2.591 | 2.567 | 2.273 | 0.022 | 0.075 | 0.197 |
| 180 | 2.602 | 2.572 | 2.273 | 0.023 | 0.079 | 0.197 |
| 190 | 2.594 | 2.577 | 2.273 | 0.025 | 0.082 | 0.197 |
| 200 | 2.604 | 2.582 | 2.273 | 0.026 | 0.086 | 0.197 |
| 210 | 2.575 | 2.587 | 2.273 | 0.027 | 0.090 | 0.197 |
| 220 | 2.584 | 2.591 | 2.273 | 0.028 | 0.093 | 0.197 |
| 230 | 2.586 | 2.596 | 2.273 | 0.029 | 0.097 | 0.197 |
| 240 | 2.596 | 2.601 | 2.273 | 0.031 | 0.100 | 0.197 |
| 250 | 2.614 | 2.605 | 2.273 | 0.032 | 0.104 | 0.197 |
| 260 | 2.625 | 2.610 | 2.273 | 0.033 | 0.107 | 0.197 |
| 270 | 2.622 | 2.614 | 2.273 | 0.034 | 0.110 | 0.197 |
| 280 | 2.631 | 2.619 | 2.273 | 0.035 | 0.114 | 0.197 |
| 290 | 2.624 | 2.623 | 2.273 | 0.036 | 0.117 | 0.197 |
| 300 | 2.624 | 2.627 | 2.273 | 0.037 | 0.120 | 0.197 |
| 310 | 2.629 | 2.632 | 2.273 | 0.039 | 0.123 | 0.197 |
| 320 | 2.628 | 2.636 | 2.273 | 0.040 | 0.126 | 0.197 |
| 330 | 2.662 | 2.640 | 2.273 | 0.041 | 0.129 | 0.197 |
| 340 | 2.630 | 2.644 | 2.273 | 0.042 | 0.132 | 0.197 |
| 350 | 2.652 | 2.648 | 2.273 | 0.043 | 0.135 | 0.197 |
| 360 | 2.661 | 2.652 | 2.273 | 0.044 | 0.138 | 0.197 |
| 370 | 2.670 | 2.656 | 2.273 | 0.045 | 0.141 | 0.197 |
| 380 | 2.665 | 2.660 | 2.273 | 0.046 | 0.143 | 0.197 |
| 390 | 2.676 | 2.664 | 2.273 | 0.047 | 0.146 | 0.197 |
| 400 | 2.658 | 2.667 | 2.273 | 0.048 | 0.149 | 0.197 |
| 410 | 2.686 | 2.671 | 2.273 | 0.049 | 0.152 | 0.197 |
| 420 | 2.676 | 2.675 | 2.273 | 0.050 | 0.154 | 0.197 |
| 430 | 2.673 | 2.678 | 2.273 | 0.052 | 0.157 | 0.197 |
| 440 | 2.698 | 2.682 | 2.273 | 0.053 | 0.159 | 0.197 |
| 450 | 2.688 | 2.686 | 2.273 | 0.054 | 0.162 | 0.197 |
| 460 | 2.682 | 2.689 | 2.273 | 0.055 | 0.164 | 0.197 |
| 470 | 2.755 | 2.692 | 2.273 | 0.056 | 0.167 | 0.197 |
| 480 | 2.695 | 2.696 | 2.273 | 0.057 | 0.169 | 0.197 |
| 490 | 2.688 | 2.699 | 2.273 | 0.058 | 0.172 | 0.197 |
| 500 | 2.701 | 2.703 | 2.273 | 0.059 | 0.174 | 0.197 |
| 510 | 2.702 | 2.706 | 2.273 | 0.060 | 0.176 | 0.197 |
| 520 | 2.709 | 2.709 | 2.273 | 0.061 | 0.178 | 0.197 |
| 530 | 2.683 | 2.712 | 2.273 | 0.062 | 0.181 | 0.197 |
| 540 | 2.721 | 2.715 | 2.273 | 0.063 | 0.183 | 0.197 |

|             |                                                                          |       |       |       |       |       |       |       |                                                                                                                                   |
|-------------|--------------------------------------------------------------------------|-------|-------|-------|-------|-------|-------|-------|-----------------------------------------------------------------------------------------------------------------------------------|
|             |                                                                          | 550   | 2.714 | 2.719 | 2.273 | 0.064 | 0.185 | 0.197 |                                                                                                                                   |
|             |                                                                          | 560   | 2.720 | 2.722 | 2.273 | 0.065 | 0.187 | 0.197 |                                                                                                                                   |
|             |                                                                          | 570   | 2.748 | 2.725 | 2.273 | 0.065 | 0.189 | 0.197 |                                                                                                                                   |
|             |                                                                          | 580   | 2.724 | 2.728 | 2.273 | 0.066 | 0.191 | 0.197 |                                                                                                                                   |
|             |                                                                          | 590   | 2.741 | 2.731 | 2.273 | 0.067 | 0.193 | 0.197 |                                                                                                                                   |
|             |                                                                          | 600   | 2.721 | 2.733 | 2.273 | 0.068 | 0.195 | 0.197 |                                                                                                                                   |
| GFET<br>#M4 | $c^{(CEA)} = 2$<br>nM<br>$c^{(AFP)} = 5$<br>nM<br>$c^{(PTH)} = 50$<br>nM | -50   | 2.287 | 2.268 | -     | -     | -     | -     | $\tilde{c}^{(CEA)} \approx$<br>2.6576 nM<br>$\tilde{c}^{(AFP)} \approx$<br>3.6211 nM<br>$\tilde{c}^{(PTH)} \approx$<br>94.0852 nM |
|             |                                                                          | -40   | 2.244 | 2.268 |       |       |       |       |                                                                                                                                   |
|             |                                                                          | -30   | 2.253 | 2.268 |       |       |       |       |                                                                                                                                   |
|             |                                                                          | -20   | 2.280 | 2.268 |       |       |       |       |                                                                                                                                   |
|             |                                                                          | -10   | 2.271 | 2.268 |       |       |       |       |                                                                                                                                   |
|             |                                                                          | 0     | 2.271 | 2.268 | 2.268 | 0.000 | 0.000 | 0.000 |                                                                                                                                   |
|             |                                                                          | 10    | 2.353 | 2.394 | 2.268 | 0.004 | 0.002 | 0.120 |                                                                                                                                   |
|             |                                                                          | 20    | 2.402 | 2.445 | 2.268 | 0.008 | 0.005 | 0.164 |                                                                                                                                   |
|             |                                                                          | 30    | 2.412 | 2.468 | 2.268 | 0.012 | 0.007 | 0.181 |                                                                                                                                   |
|             |                                                                          | 40    | 2.452 | 2.481 | 2.268 | 0.016 | 0.010 | 0.187 |                                                                                                                                   |
|             |                                                                          | 50    | 2.448 | 2.490 | 2.268 | 0.020 | 0.012 | 0.190 |                                                                                                                                   |
|             |                                                                          | 60    | 2.498 | 2.497 | 2.268 | 0.024 | 0.014 | 0.191 |                                                                                                                                   |
|             |                                                                          | 70    | 2.498 | 2.503 | 2.268 | 0.028 | 0.017 | 0.191 |                                                                                                                                   |
|             |                                                                          | 80    | 2.526 | 2.510 | 2.268 | 0.032 | 0.019 | 0.191 |                                                                                                                                   |
|             |                                                                          | 90    | 2.519 | 2.516 | 2.268 | 0.036 | 0.021 | 0.191 |                                                                                                                                   |
|             |                                                                          | 100   | 2.523 | 2.521 | 2.268 | 0.039 | 0.023 | 0.191 |                                                                                                                                   |
|             |                                                                          | 110   | 2.554 | 2.527 | 2.268 | 0.043 | 0.026 | 0.191 |                                                                                                                                   |
|             |                                                                          | 120   | 2.539 | 2.533 | 2.268 | 0.047 | 0.028 | 0.191 |                                                                                                                                   |
|             |                                                                          | 130   | 2.573 | 2.539 | 2.268 | 0.050 | 0.030 | 0.191 |                                                                                                                                   |
|             |                                                                          | 140   | 2.587 | 2.544 | 2.268 | 0.054 | 0.032 | 0.191 |                                                                                                                                   |
|             |                                                                          | 150   | 2.554 | 2.550 | 2.268 | 0.057 | 0.034 | 0.191 |                                                                                                                                   |
|             |                                                                          | 160   | 2.562 | 2.555 | 2.268 | 0.061 | 0.036 | 0.191 |                                                                                                                                   |
|             |                                                                          | 170   | 2.573 | 2.561 | 2.268 | 0.064 | 0.038 | 0.191 |                                                                                                                                   |
|             |                                                                          | 180   | 2.589 | 2.566 | 2.268 | 0.067 | 0.040 | 0.191 |                                                                                                                                   |
|             |                                                                          | 190   | 2.609 | 2.572 | 2.268 | 0.071 | 0.042 | 0.191 |                                                                                                                                   |
|             |                                                                          | 200   | 2.564 | 2.577 | 2.268 | 0.074 | 0.044 | 0.191 |                                                                                                                                   |
|             |                                                                          | 210   | 2.611 | 2.582 | 2.268 | 0.077 | 0.046 | 0.191 |                                                                                                                                   |
|             |                                                                          | 220   | 2.590 | 2.587 | 2.268 | 0.080 | 0.048 | 0.191 |                                                                                                                                   |
|             |                                                                          | 230   | 2.595 | 2.592 | 2.268 | 0.083 | 0.050 | 0.191 |                                                                                                                                   |
|             |                                                                          | 240   | 2.614 | 2.597 | 2.268 | 0.087 | 0.052 | 0.191 |                                                                                                                                   |
|             |                                                                          | 250   | 2.606 | 2.602 | 2.268 | 0.090 | 0.053 | 0.191 |                                                                                                                                   |
|             |                                                                          | 260   | 2.631 | 2.607 | 2.268 | 0.093 | 0.055 | 0.191 |                                                                                                                                   |
|             |                                                                          | 270   | 2.629 | 2.612 | 2.268 | 0.096 | 0.057 | 0.191 |                                                                                                                                   |
|             |                                                                          | 280   | 2.629 | 2.616 | 2.268 | 0.099 | 0.059 | 0.191 |                                                                                                                                   |
| 290         | 2.617                                                                    | 2.621 | 2.268 | 0.102 | 0.060 | 0.191 |       |       |                                                                                                                                   |
| 300         | 2.627                                                                    | 2.626 | 2.268 | 0.104 | 0.062 | 0.191 |       |       |                                                                                                                                   |
| 310         | 2.626                                                                    | 2.630 | 2.268 | 0.107 | 0.064 | 0.191 |       |       |                                                                                                                                   |
| 320         | 2.633                                                                    | 2.635 | 2.268 | 0.110 | 0.066 | 0.191 |       |       |                                                                                                                                   |
| 330         | 2.633                                                                    | 2.639 | 2.268 | 0.113 | 0.067 | 0.191 |       |       |                                                                                                                                   |
| 340         | 2.639                                                                    | 2.643 | 2.268 | 0.116 | 0.069 | 0.191 |       |       |                                                                                                                                   |

|             |                        |       |       |       |       |       |       |       |                                          |                                           |
|-------------|------------------------|-------|-------|-------|-------|-------|-------|-------|------------------------------------------|-------------------------------------------|
|             |                        | 350   | 2.669 | 2.648 | 2.268 | 0.118 | 0.070 | 0.191 |                                          |                                           |
|             |                        | 360   | 2.670 | 2.652 | 2.268 | 0.121 | 0.072 | 0.191 |                                          |                                           |
|             |                        | 370   | 2.632 | 2.656 | 2.268 | 0.124 | 0.074 | 0.191 |                                          |                                           |
|             |                        | 380   | 2.650 | 2.660 | 2.268 | 0.126 | 0.075 | 0.191 |                                          |                                           |
|             |                        | 390   | 2.665 | 2.665 | 2.268 | 0.129 | 0.077 | 0.191 |                                          |                                           |
|             |                        | 400   | 2.654 | 2.669 | 2.268 | 0.131 | 0.078 | 0.191 |                                          |                                           |
|             |                        | 410   | 2.669 | 2.673 | 2.268 | 0.134 | 0.080 | 0.191 |                                          |                                           |
|             |                        | 420   | 2.670 | 2.677 | 2.268 | 0.136 | 0.081 | 0.191 |                                          |                                           |
|             |                        | 430   | 2.655 | 2.681 | 2.268 | 0.139 | 0.083 | 0.191 |                                          |                                           |
|             |                        | 440   | 2.670 | 2.684 | 2.268 | 0.141 | 0.084 | 0.191 |                                          |                                           |
|             |                        | 450   | 2.677 | 2.688 | 2.268 | 0.144 | 0.086 | 0.191 |                                          |                                           |
|             |                        | 460   | 2.664 | 2.692 | 2.268 | 0.146 | 0.087 | 0.191 |                                          |                                           |
|             |                        | 470   | 2.680 | 2.696 | 2.268 | 0.148 | 0.088 | 0.191 |                                          |                                           |
|             |                        | 480   | 2.700 | 2.699 | 2.268 | 0.151 | 0.090 | 0.191 |                                          |                                           |
|             |                        | 490   | 2.699 | 2.703 | 2.268 | 0.153 | 0.091 | 0.191 |                                          |                                           |
|             |                        | 500   | 2.683 | 2.707 | 2.268 | 0.155 | 0.093 | 0.191 |                                          |                                           |
|             |                        | 510   | 2.717 | 2.710 | 2.268 | 0.157 | 0.094 | 0.191 |                                          |                                           |
|             |                        | 520   | 2.718 | 2.714 | 2.268 | 0.160 | 0.095 | 0.191 |                                          |                                           |
|             |                        | 530   | 2.721 | 2.717 | 2.268 | 0.162 | 0.096 | 0.191 |                                          |                                           |
|             |                        | 540   | 2.715 | 2.721 | 2.268 | 0.164 | 0.098 | 0.191 |                                          |                                           |
|             |                        | 550   | 2.702 | 2.724 | 2.268 | 0.166 | 0.099 | 0.191 |                                          |                                           |
|             |                        | 560   | 2.733 | 2.727 | 2.268 | 0.168 | 0.100 | 0.191 |                                          |                                           |
|             |                        | 570   | 2.714 | 2.731 | 2.268 | 0.170 | 0.102 | 0.191 |                                          |                                           |
|             |                        | 580   | 2.721 | 2.734 | 2.268 | 0.172 | 0.103 | 0.191 |                                          |                                           |
|             |                        | 590   | 2.733 | 2.737 | 2.268 | 0.174 | 0.104 | 0.191 |                                          |                                           |
|             |                        | 600   | 2.736 | 2.740 | 2.268 | 0.176 | 0.105 | 0.191 |                                          |                                           |
| GFET<br>#M5 | $c^{(CEA)} = 2$<br>nM  | -50   | 2.284 | 2.269 | -     | -     | -     | -     | $\tilde{c}^{(CEA)} \approx$<br>1.2332 nM |                                           |
|             |                        | -40   | 2.257 | 2.269 |       |       |       |       |                                          |                                           |
|             |                        | -30   | 2.246 | 2.269 |       |       |       |       |                                          |                                           |
|             |                        | -20   | 2.246 | 2.269 |       |       |       |       |                                          |                                           |
|             |                        | -10   | 2.289 | 2.269 |       |       |       |       |                                          |                                           |
|             | 0                      | 2.289 | 2.269 | 2.269 | 0.000 | 0.000 | 0.000 |       |                                          |                                           |
|             | 10                     | 2.303 | 2.297 | 2.269 | 0.002 | 0.010 | 0.016 |       |                                          |                                           |
|             | 20                     | 2.371 | 2.323 | 2.269 | 0.004 | 0.020 | 0.031 |       |                                          |                                           |
|             | 30                     | 2.391 | 2.347 | 2.269 | 0.006 | 0.029 | 0.044 |       |                                          |                                           |
|             | $c^{(AFP)} = 20$<br>nM | 40    | 2.395 | 2.370 | 2.269 | 0.008 | 0.039 | 0.055 |                                          | $\tilde{c}^{(AFP)} \approx$<br>13.1342 nM |
|             |                        | 50    | 2.411 | 2.392 | 2.269 | 0.010 | 0.048 | 0.066 |                                          |                                           |
|             | $c^{(PTH)} = 2$<br>nM  | 60    | 2.426 | 2.412 | 2.269 | 0.011 | 0.057 | 0.075 |                                          | $\tilde{c}^{(PTH)} \approx$<br>8.0776 nM  |
|             |                        | 70    | 2.457 | 2.431 | 2.269 | 0.013 | 0.065 | 0.084 |                                          |                                           |
|             |                        | 80    | 2.473 | 2.449 | 2.269 | 0.015 | 0.074 | 0.092 |                                          |                                           |
|             |                        | 90    | 2.475 | 2.466 | 2.269 | 0.017 | 0.082 | 0.098 |                                          |                                           |
|             |                        | 100   | 2.529 | 2.482 | 2.269 | 0.019 | 0.091 | 0.105 |                                          |                                           |
|             |                        | 110   | 2.502 | 2.498 | 2.269 | 0.020 | 0.099 | 0.110 |                                          |                                           |
| 120         | 2.534                  | 2.512 | 2.269 | 0.022 | 0.106 | 0.115 |       |       |                                          |                                           |
| 130         | 2.532                  | 2.526 | 2.269 | 0.024 | 0.114 | 0.120 |       |       |                                          |                                           |
| 140         | 2.561                  | 2.540 | 2.269 | 0.026 | 0.122 | 0.124 |       |       |                                          |                                           |

|     |       |       |       |       |       |       |
|-----|-------|-------|-------|-------|-------|-------|
| 150 | 2.575 | 2.552 | 2.269 | 0.028 | 0.129 | 0.127 |
| 160 | 2.584 | 2.565 | 2.269 | 0.029 | 0.136 | 0.131 |
| 170 | 2.585 | 2.576 | 2.269 | 0.031 | 0.143 | 0.134 |
| 180 | 2.572 | 2.587 | 2.269 | 0.033 | 0.150 | 0.136 |
| 190 | 2.596 | 2.598 | 2.269 | 0.034 | 0.157 | 0.139 |
| 200 | 2.609 | 2.609 | 2.269 | 0.036 | 0.163 | 0.141 |
| 210 | 2.605 | 2.619 | 2.269 | 0.038 | 0.170 | 0.143 |
| 220 | 2.629 | 2.628 | 2.269 | 0.039 | 0.176 | 0.144 |
| 230 | 2.637 | 2.638 | 2.269 | 0.041 | 0.182 | 0.146 |
| 240 | 2.653 | 2.647 | 2.269 | 0.043 | 0.188 | 0.147 |
| 250 | 2.657 | 2.656 | 2.269 | 0.044 | 0.194 | 0.149 |
| 260 | 2.634 | 2.664 | 2.269 | 0.046 | 0.200 | 0.150 |
| 270 | 2.656 | 2.672 | 2.269 | 0.047 | 0.206 | 0.151 |
| 280 | 2.672 | 2.680 | 2.269 | 0.049 | 0.211 | 0.152 |
| 290 | 2.664 | 2.688 | 2.269 | 0.051 | 0.217 | 0.153 |
| 300 | 2.680 | 2.696 | 2.269 | 0.052 | 0.222 | 0.153 |
| 310 | 2.657 | 2.703 | 2.269 | 0.054 | 0.227 | 0.154 |
| 320 | 2.699 | 2.710 | 2.269 | 0.055 | 0.232 | 0.155 |
| 330 | 2.689 | 2.717 | 2.269 | 0.057 | 0.237 | 0.155 |
| 340 | 2.704 | 2.724 | 2.269 | 0.058 | 0.242 | 0.156 |
| 350 | 2.718 | 2.731 | 2.269 | 0.060 | 0.247 | 0.156 |
| 360 | 2.695 | 2.737 | 2.269 | 0.061 | 0.251 | 0.156 |
| 370 | 2.729 | 2.744 | 2.269 | 0.063 | 0.256 | 0.157 |
| 380 | 2.758 | 2.750 | 2.269 | 0.064 | 0.260 | 0.157 |
| 390 | 2.705 | 2.756 | 2.269 | 0.066 | 0.265 | 0.157 |
| 400 | 2.723 | 2.762 | 2.269 | 0.067 | 0.269 | 0.158 |
| 410 | 2.744 | 2.768 | 2.269 | 0.069 | 0.273 | 0.158 |
| 420 | 2.726 | 2.774 | 2.269 | 0.070 | 0.277 | 0.158 |
| 430 | 2.760 | 2.779 | 2.269 | 0.071 | 0.281 | 0.158 |
| 440 | 2.769 | 2.785 | 2.269 | 0.073 | 0.285 | 0.158 |
| 450 | 2.785 | 2.790 | 2.269 | 0.074 | 0.289 | 0.159 |
| 460 | 2.767 | 2.795 | 2.269 | 0.076 | 0.293 | 0.159 |
| 470 | 2.799 | 2.800 | 2.269 | 0.077 | 0.296 | 0.159 |
| 480 | 2.799 | 2.806 | 2.269 | 0.078 | 0.300 | 0.159 |
| 490 | 2.797 | 2.810 | 2.269 | 0.080 | 0.303 | 0.159 |
| 500 | 2.797 | 2.815 | 2.269 | 0.081 | 0.307 | 0.159 |
| 510 | 2.803 | 2.820 | 2.269 | 0.082 | 0.310 | 0.159 |
| 520 | 2.802 | 2.825 | 2.269 | 0.084 | 0.313 | 0.159 |
| 530 | 2.839 | 2.829 | 2.269 | 0.085 | 0.317 | 0.159 |
| 540 | 2.795 | 2.834 | 2.269 | 0.086 | 0.320 | 0.159 |
| 550 | 2.846 | 2.838 | 2.269 | 0.088 | 0.323 | 0.159 |
| 560 | 2.844 | 2.843 | 2.269 | 0.089 | 0.326 | 0.159 |
| 570 | 2.830 | 2.847 | 2.269 | 0.090 | 0.329 | 0.160 |
| 580 | 2.851 | 2.851 | 2.269 | 0.091 | 0.332 | 0.160 |
| 590 | 2.873 | 2.855 | 2.269 | 0.093 | 0.334 | 0.160 |
| 600 | 2.846 | 2.859 | 2.269 | 0.094 | 0.337 | 0.160 |

|             |                        |       |       |       |       |       |       |                                           |                                          |
|-------------|------------------------|-------|-------|-------|-------|-------|-------|-------------------------------------------|------------------------------------------|
| GFET<br>#M6 | $c^{(CEA)} = 2$<br>nM  | -50   | 2.262 | 2.269 | -     | -     | -     | -                                         | $\tilde{c}^{(CEA)} \approx$<br>1.5144 nM |
|             |                        | -40   | 2.260 | 2.269 |       |       |       |                                           |                                          |
|             |                        | -30   | 2.282 | 2.269 |       |       |       |                                           |                                          |
|             |                        | -20   | 2.261 | 2.269 |       |       |       |                                           |                                          |
|             |                        | -10   | 2.275 | 2.269 |       |       |       |                                           |                                          |
|             |                        | 0     | 2.275 | 2.269 | 2.269 | 0.000 | 0.000 | 0.000                                     |                                          |
|             |                        | 10    | 2.293 | 2.307 | 2.269 | 0.003 | 0.009 | 0.027                                     |                                          |
|             |                        | 20    | 2.351 | 2.341 | 2.269 | 0.005 | 0.018 | 0.049                                     |                                          |
|             |                        | 30    | 2.423 | 2.372 | 2.269 | 0.008 | 0.027 | 0.068                                     |                                          |
|             |                        | 40    | 2.439 | 2.399 | 2.269 | 0.010 | 0.036 | 0.084                                     |                                          |
|             |                        | 50    | 2.429 | 2.423 | 2.269 | 0.012 | 0.044 | 0.097                                     |                                          |
|             |                        | 60    | 2.464 | 2.445 | 2.269 | 0.015 | 0.052 | 0.109                                     |                                          |
|             |                        | 70    | 2.486 | 2.465 | 2.269 | 0.017 | 0.060 | 0.119                                     |                                          |
|             |                        | 80    | 2.505 | 2.484 | 2.269 | 0.020 | 0.068 | 0.127                                     |                                          |
|             |                        | 90    | 2.515 | 2.501 | 2.269 | 0.022 | 0.076 | 0.134                                     |                                          |
|             |                        | 100   | 2.515 | 2.517 | 2.269 | 0.024 | 0.084 | 0.140                                     |                                          |
|             |                        | 110   | 2.559 | 2.531 | 2.269 | 0.027 | 0.091 | 0.145                                     |                                          |
|             |                        | 120   | 2.550 | 2.545 | 2.269 | 0.029 | 0.098 | 0.149                                     |                                          |
|             |                        | 130   | 2.560 | 2.558 | 2.269 | 0.031 | 0.105 | 0.152                                     |                                          |
|             |                        | 140   | 2.585 | 2.570 | 2.269 | 0.034 | 0.112 | 0.155                                     |                                          |
|             |                        | 150   | 2.545 | 2.582 | 2.269 | 0.036 | 0.119 | 0.158                                     |                                          |
|             |                        | 160   | 2.564 | 2.593 | 2.269 | 0.038 | 0.126 | 0.160                                     |                                          |
|             |                        | 170   | 2.600 | 2.603 | 2.269 | 0.040 | 0.132 | 0.162                                     |                                          |
|             |                        | 180   | 2.608 | 2.613 | 2.269 | 0.042 | 0.138 | 0.163                                     |                                          |
|             |                        | 190   | 2.627 | 2.623 | 2.269 | 0.045 | 0.145 | 0.165                                     |                                          |
|             |                        | 200   | 2.610 | 2.632 | 2.269 | 0.047 | 0.151 | 0.166                                     |                                          |
|             |                        | 210   | 2.647 | 2.641 | 2.269 | 0.049 | 0.157 | 0.167                                     |                                          |
|             |                        | 220   | 2.631 | 2.650 | 2.269 | 0.051 | 0.162 | 0.167                                     |                                          |
|             |                        | 230   | 2.658 | 2.659 | 2.269 | 0.053 | 0.168 | 0.168                                     |                                          |
|             |                        | 240   | 2.669 | 2.667 | 2.269 | 0.055 | 0.174 | 0.169                                     |                                          |
|             |                        | 250   | 2.646 | 2.675 | 2.269 | 0.057 | 0.179 | 0.169                                     |                                          |
|             |                        | 260   | 2.668 | 2.682 | 2.269 | 0.059 | 0.184 | 0.169                                     |                                          |
|             |                        | 270   | 2.679 | 2.690 | 2.269 | 0.061 | 0.190 | 0.170                                     |                                          |
|             |                        | 280   | 2.710 | 2.697 | 2.269 | 0.063 | 0.195 | 0.170                                     |                                          |
|             |                        | 290   | 2.713 | 2.705 | 2.269 | 0.065 | 0.200 | 0.170                                     |                                          |
|             |                        | 300   | 2.676 | 2.712 | 2.269 | 0.067 | 0.205 | 0.171                                     |                                          |
|             |                        | 310   | 2.716 | 2.719 | 2.269 | 0.069 | 0.209 | 0.171                                     |                                          |
|             |                        | 320   | 2.710 | 2.725 | 2.269 | 0.071 | 0.214 | 0.171                                     |                                          |
|             |                        | 330   | 2.737 | 2.732 | 2.269 | 0.073 | 0.219 | 0.171                                     |                                          |
|             |                        | 340   | 2.738 | 2.739 | 2.269 | 0.075 | 0.223 | 0.171                                     |                                          |
| 350         | 2.753                  | 2.745 | 2.269 | 0.077 | 0.227 | 0.171 |       |                                           |                                          |
| 360         | 2.749                  | 2.751 | 2.269 | 0.079 | 0.232 | 0.171 |       |                                           |                                          |
| 370         | 2.740                  | 2.757 | 2.269 | 0.081 | 0.236 | 0.171 |       |                                           |                                          |
| 380         | 2.740                  | 2.763 | 2.269 | 0.083 | 0.240 | 0.171 |       |                                           |                                          |
| 390         | 2.763                  | 2.769 | 2.269 | 0.085 | 0.244 | 0.171 |       |                                           |                                          |
| 400         | 2.764                  | 2.775 | 2.269 | 0.086 | 0.248 | 0.171 |       |                                           |                                          |
|             | $c^{(AFP)} = 20$<br>nM |       |       |       |       |       |       | $\tilde{c}^{(AFP)} \approx$<br>13.2040 nM |                                          |
|             | $c^{(PTH)} = 5$<br>nM  |       |       |       |       |       |       | $\tilde{c}^{(PTH)} \approx$<br>14.0982 nM |                                          |

|             |                        |       |       |       |       |       |       |       |                                         |                                          |
|-------------|------------------------|-------|-------|-------|-------|-------|-------|-------|-----------------------------------------|------------------------------------------|
|             |                        | 410   | 2.767 | 2.781 | 2.269 | 0.088 | 0.252 | 0.171 |                                         |                                          |
|             |                        | 420   | 2.779 | 2.786 | 2.269 | 0.090 | 0.255 | 0.172 |                                         |                                          |
|             |                        | 430   | 2.785 | 2.792 | 2.269 | 0.092 | 0.259 | 0.172 |                                         |                                          |
|             |                        | 440   | 2.773 | 2.797 | 2.269 | 0.094 | 0.263 | 0.172 |                                         |                                          |
|             |                        | 450   | 2.781 | 2.802 | 2.269 | 0.095 | 0.266 | 0.172 |                                         |                                          |
|             |                        | 460   | 2.790 | 2.807 | 2.269 | 0.097 | 0.270 | 0.172 |                                         |                                          |
|             |                        | 470   | 2.776 | 2.813 | 2.269 | 0.099 | 0.273 | 0.172 |                                         |                                          |
|             |                        | 480   | 2.811 | 2.818 | 2.269 | 0.100 | 0.276 | 0.172 |                                         |                                          |
|             |                        | 490   | 2.835 | 2.822 | 2.269 | 0.102 | 0.280 | 0.172 |                                         |                                          |
|             |                        | 500   | 2.823 | 2.827 | 2.269 | 0.104 | 0.283 | 0.172 |                                         |                                          |
|             |                        | 510   | 2.820 | 2.832 | 2.269 | 0.105 | 0.286 | 0.172 |                                         |                                          |
|             |                        | 520   | 2.813 | 2.837 | 2.269 | 0.107 | 0.289 | 0.172 |                                         |                                          |
|             |                        | 530   | 2.841 | 2.841 | 2.269 | 0.109 | 0.292 | 0.172 |                                         |                                          |
|             |                        | 540   | 2.846 | 2.846 | 2.269 | 0.110 | 0.295 | 0.172 |                                         |                                          |
|             |                        | 550   | 2.807 | 2.850 | 2.269 | 0.112 | 0.297 | 0.172 |                                         |                                          |
|             |                        | 560   | 2.831 | 2.855 | 2.269 | 0.114 | 0.300 | 0.172 |                                         |                                          |
|             |                        | 570   | 2.850 | 2.859 | 2.269 | 0.115 | 0.303 | 0.172 |                                         |                                          |
|             |                        | 580   | 2.857 | 2.863 | 2.269 | 0.117 | 0.306 | 0.172 |                                         |                                          |
|             |                        | 590   | 2.852 | 2.867 | 2.269 | 0.118 | 0.308 | 0.172 |                                         |                                          |
|             |                        | 600   | 2.866 | 2.871 | 2.269 | 0.120 | 0.311 | 0.172 |                                         |                                          |
| GFET<br>#M7 | $c^{(CEA)} = 2$<br>nM  | -50   | 2.277 | 2.262 | -     | -     | -     | -     | $\bar{c}^{(CEA)} \approx 1.61$<br>32 nM |                                          |
|             |                        | -40   | 2.271 | 2.262 |       |       |       |       |                                         |                                          |
|             |                        | -30   | 2.267 | 2.262 |       |       |       |       |                                         |                                          |
|             |                        | -20   | 2.258 | 2.262 |       |       |       |       |                                         |                                          |
|             |                        | -10   | 2.250 | 2.262 |       |       |       |       |                                         |                                          |
|             | 0                      | 2.250 | 2.262 | 2.262 | 0.000 | 0.000 | 0.000 |       |                                         |                                          |
|             | $c^{(AFP)} = 20$<br>nM | 10    | 2.338 | 2.337 | 2.262 | 0.003 | 0.009 | 0.063 |                                         |                                          |
|             |                        | 20    | 2.368 | 2.390 | 2.262 | 0.005 | 0.018 | 0.105 |                                         |                                          |
|             |                        | 30    | 2.413 | 2.429 | 2.262 | 0.008 | 0.027 | 0.132 |                                         |                                          |
|             |                        | 40    | 2.457 | 2.458 | 2.262 | 0.011 | 0.035 | 0.150 |                                         |                                          |
|             |                        | 50    | 2.508 | 2.481 | 2.262 | 0.013 | 0.044 | 0.162 |                                         | $\bar{c}^{(AFP)} \approx 12.5$<br>543 nM |
|             | $c^{(PTH)} = 20$<br>nM | 60    | 2.490 | 2.499 | 2.262 | 0.016 | 0.052 | 0.169 |                                         |                                          |
|             |                        | 70    | 2.522 | 2.515 | 2.262 | 0.019 | 0.060 | 0.174 |                                         |                                          |
|             |                        | 80    | 2.540 | 2.528 | 2.262 | 0.021 | 0.068 | 0.178 |                                         |                                          |
|             |                        | 90    | 2.533 | 2.541 | 2.262 | 0.024 | 0.075 | 0.180 |                                         | $\bar{c}^{(PTH)} \approx$<br>39.1008 nM  |
|             |                        | 100   | 2.577 | 2.552 | 2.262 | 0.026 | 0.083 | 0.181 |                                         |                                          |
|             |                        | 110   | 2.550 | 2.563 | 2.262 | 0.029 | 0.090 | 0.182 |                                         |                                          |
|             |                        | 120   | 2.570 | 2.573 | 2.262 | 0.031 | 0.097 | 0.183 |                                         |                                          |
|             |                        | 130   | 2.602 | 2.583 | 2.262 | 0.034 | 0.104 | 0.183 |                                         |                                          |
|             |                        | 140   | 2.628 | 2.593 | 2.262 | 0.036 | 0.111 | 0.183 |                                         |                                          |
|             |                        | 150   | 2.603 | 2.602 | 2.262 | 0.038 | 0.118 | 0.183 |                                         |                                          |
|             |                        | 160   | 2.620 | 2.611 | 2.262 | 0.041 | 0.125 | 0.184 |                                         |                                          |
|             |                        | 170   | 2.646 | 2.620 | 2.262 | 0.043 | 0.131 | 0.184 |                                         |                                          |
| 180         |                        | 2.640 | 2.629 | 2.262 | 0.045 | 0.138 | 0.184 |       |                                         |                                          |
| 190         | 2.617                  | 2.637 | 2.262 | 0.048 | 0.144 | 0.184 |       |       |                                         |                                          |
| 200         | 2.676                  | 2.646 | 2.262 | 0.050 | 0.150 | 0.184 |       |       |                                         |                                          |

|             |                        |       |       |       |       |       |       |       |                                          |   |   |   |                                           |
|-------------|------------------------|-------|-------|-------|-------|-------|-------|-------|------------------------------------------|---|---|---|-------------------------------------------|
|             |                        | 210   | 2.656 | 2.654 | 2.262 | 0.052 | 0.156 | 0.184 |                                          |   |   |   |                                           |
|             |                        | 220   | 2.694 | 2.662 | 2.262 | 0.055 | 0.162 | 0.184 |                                          |   |   |   |                                           |
|             |                        | 230   | 2.671 | 2.670 | 2.262 | 0.057 | 0.167 | 0.184 |                                          |   |   |   |                                           |
|             |                        | 240   | 2.684 | 2.678 | 2.262 | 0.059 | 0.173 | 0.184 |                                          |   |   |   |                                           |
|             |                        | 250   | 2.685 | 2.685 | 2.262 | 0.061 | 0.178 | 0.184 |                                          |   |   |   |                                           |
|             |                        | 260   | 2.682 | 2.693 | 2.262 | 0.063 | 0.184 | 0.184 |                                          |   |   |   |                                           |
|             |                        | 270   | 2.722 | 2.700 | 2.262 | 0.066 | 0.189 | 0.184 |                                          |   |   |   |                                           |
|             |                        | 280   | 2.701 | 2.708 | 2.262 | 0.068 | 0.194 | 0.184 |                                          |   |   |   |                                           |
|             |                        | 290   | 2.737 | 2.715 | 2.262 | 0.070 | 0.199 | 0.184 |                                          |   |   |   |                                           |
|             |                        | 300   | 2.715 | 2.722 | 2.262 | 0.072 | 0.204 | 0.184 |                                          |   |   |   |                                           |
|             |                        | 310   | 2.711 | 2.729 | 2.262 | 0.074 | 0.209 | 0.184 |                                          |   |   |   |                                           |
|             |                        | 320   | 2.723 | 2.736 | 2.262 | 0.076 | 0.213 | 0.184 |                                          |   |   |   |                                           |
|             |                        | 330   | 2.739 | 2.742 | 2.262 | 0.078 | 0.218 | 0.184 |                                          |   |   |   |                                           |
|             |                        | 340   | 2.753 | 2.749 | 2.262 | 0.080 | 0.223 | 0.184 |                                          |   |   |   |                                           |
|             |                        | 350   | 2.732 | 2.755 | 2.262 | 0.082 | 0.227 | 0.184 |                                          |   |   |   |                                           |
|             |                        | 360   | 2.736 | 2.761 | 2.262 | 0.084 | 0.231 | 0.184 |                                          |   |   |   |                                           |
|             |                        | 370   | 2.737 | 2.768 | 2.262 | 0.086 | 0.236 | 0.184 |                                          |   |   |   |                                           |
|             |                        | 380   | 2.761 | 2.774 | 2.262 | 0.088 | 0.240 | 0.184 |                                          |   |   |   |                                           |
|             |                        | 390   | 2.756 | 2.780 | 2.262 | 0.090 | 0.244 | 0.184 |                                          |   |   |   |                                           |
|             |                        | 400   | 2.780 | 2.786 | 2.262 | 0.092 | 0.248 | 0.184 |                                          |   |   |   |                                           |
|             |                        | 410   | 2.763 | 2.791 | 2.262 | 0.094 | 0.252 | 0.184 |                                          |   |   |   |                                           |
|             |                        | 420   | 2.802 | 2.797 | 2.262 | 0.096 | 0.255 | 0.184 |                                          |   |   |   |                                           |
|             |                        | 430   | 2.792 | 2.803 | 2.262 | 0.098 | 0.259 | 0.184 |                                          |   |   |   |                                           |
|             |                        | 440   | 2.793 | 2.808 | 2.262 | 0.100 | 0.263 | 0.184 |                                          |   |   |   |                                           |
|             |                        | 450   | 2.814 | 2.814 | 2.262 | 0.101 | 0.266 | 0.184 |                                          |   |   |   |                                           |
|             |                        | 460   | 2.812 | 2.819 | 2.262 | 0.103 | 0.270 | 0.184 |                                          |   |   |   |                                           |
|             |                        | 470   | 2.813 | 2.824 | 2.262 | 0.105 | 0.273 | 0.184 |                                          |   |   |   |                                           |
|             |                        | 480   | 2.803 | 2.829 | 2.262 | 0.107 | 0.277 | 0.184 |                                          |   |   |   |                                           |
|             |                        | 490   | 2.802 | 2.834 | 2.262 | 0.109 | 0.280 | 0.184 |                                          |   |   |   |                                           |
|             |                        | 500   | 2.805 | 2.839 | 2.262 | 0.110 | 0.283 | 0.184 |                                          |   |   |   |                                           |
|             |                        | 510   | 2.845 | 2.844 | 2.262 | 0.112 | 0.286 | 0.184 |                                          |   |   |   |                                           |
|             |                        | 520   | 2.819 | 2.849 | 2.262 | 0.114 | 0.289 | 0.184 |                                          |   |   |   |                                           |
|             |                        | 530   | 2.840 | 2.854 | 2.262 | 0.116 | 0.292 | 0.184 |                                          |   |   |   |                                           |
|             |                        | 540   | 2.841 | 2.859 | 2.262 | 0.117 | 0.295 | 0.184 |                                          |   |   |   |                                           |
|             |                        | 550   | 2.871 | 2.863 | 2.262 | 0.119 | 0.298 | 0.184 |                                          |   |   |   |                                           |
|             |                        | 560   | 2.856 | 2.868 | 2.262 | 0.121 | 0.301 | 0.184 |                                          |   |   |   |                                           |
|             |                        | 570   | 2.862 | 2.872 | 2.262 | 0.122 | 0.304 | 0.184 |                                          |   |   |   |                                           |
|             |                        | 580   | 2.852 | 2.876 | 2.262 | 0.124 | 0.307 | 0.184 |                                          |   |   |   |                                           |
|             |                        | 590   | 2.877 | 2.881 | 2.262 | 0.126 | 0.309 | 0.184 |                                          |   |   |   |                                           |
|             |                        | 600   | 2.874 | 2.885 | 2.262 | 0.127 | 0.312 | 0.184 |                                          |   |   |   |                                           |
| GFET<br>#M8 | $c^{(CEA)} = 2$<br>nM  | -50   | 2.291 | 2.280 | -     | -     | -     | -     | $\tilde{c}^{(CEA)} \approx$<br>1.8244 nM |   |   |   |                                           |
|             |                        | -40   | 2.274 | 2.280 |       |       |       |       |                                          |   |   |   |                                           |
|             | $c^{(AFP)} = 20$<br>nM | -30   | 2.285 | 2.280 |       |       |       |       | -                                        | - | - | - | $\tilde{c}^{(AFP)} \approx$<br>13.1763 nM |
|             |                        | -20   | 2.266 | 2.280 |       |       |       |       |                                          |   |   |   |                                           |
|             | $c^{(PTH)} = 50$<br>nM | -10   | 2.280 | 2.280 |       |       |       |       |                                          |   |   |   | 2.280                                     |
| 0           |                        | 2.280 | 2.280 |       |       |       |       |       |                                          |   |   |   |                                           |

|     |       |       |       |       |       |       |
|-----|-------|-------|-------|-------|-------|-------|
| 10  | 2.371 | 2.396 | 2.280 | 0.003 | 0.008 | 0.105 |
| 20  | 2.415 | 2.447 | 2.280 | 0.006 | 0.016 | 0.145 |
| 30  | 2.448 | 2.473 | 2.280 | 0.009 | 0.024 | 0.160 |
| 40  | 2.493 | 2.490 | 2.280 | 0.012 | 0.032 | 0.166 |
| 50  | 2.500 | 2.502 | 2.280 | 0.015 | 0.040 | 0.168 |
| 60  | 2.527 | 2.514 | 2.280 | 0.018 | 0.047 | 0.169 |
| 70  | 2.548 | 2.524 | 2.280 | 0.021 | 0.055 | 0.169 |
| 80  | 2.529 | 2.534 | 2.280 | 0.024 | 0.062 | 0.169 |
| 90  | 2.526 | 2.544 | 2.280 | 0.027 | 0.069 | 0.169 |
| 100 | 2.576 | 2.554 | 2.280 | 0.029 | 0.076 | 0.169 |
| 110 | 2.583 | 2.563 | 2.280 | 0.032 | 0.082 | 0.169 |
| 120 | 2.606 | 2.573 | 2.280 | 0.035 | 0.089 | 0.169 |
| 130 | 2.585 | 2.582 | 2.280 | 0.038 | 0.095 | 0.169 |
| 140 | 2.622 | 2.591 | 2.280 | 0.040 | 0.101 | 0.169 |
| 150 | 2.590 | 2.600 | 2.280 | 0.043 | 0.108 | 0.169 |
| 160 | 2.644 | 2.608 | 2.280 | 0.046 | 0.114 | 0.169 |
| 170 | 2.610 | 2.617 | 2.280 | 0.048 | 0.119 | 0.169 |
| 180 | 2.649 | 2.625 | 2.280 | 0.051 | 0.125 | 0.169 |
| 190 | 2.631 | 2.633 | 2.280 | 0.054 | 0.131 | 0.169 |
| 200 | 2.653 | 2.641 | 2.280 | 0.056 | 0.136 | 0.169 |
| 210 | 2.677 | 2.649 | 2.280 | 0.059 | 0.142 | 0.169 |
| 220 | 2.659 | 2.657 | 2.280 | 0.061 | 0.147 | 0.169 |
| 230 | 2.690 | 2.665 | 2.280 | 0.064 | 0.152 | 0.169 |
| 240 | 2.656 | 2.672 | 2.280 | 0.066 | 0.157 | 0.169 |
| 250 | 2.699 | 2.679 | 2.280 | 0.069 | 0.162 | 0.169 |
| 260 | 2.692 | 2.687 | 2.280 | 0.071 | 0.167 | 0.169 |
| 270 | 2.684 | 2.694 | 2.280 | 0.073 | 0.171 | 0.169 |
| 280 | 2.711 | 2.701 | 2.280 | 0.076 | 0.176 | 0.169 |
| 290 | 2.697 | 2.708 | 2.280 | 0.078 | 0.181 | 0.169 |
| 300 | 2.757 | 2.714 | 2.280 | 0.080 | 0.185 | 0.169 |
| 310 | 2.713 | 2.721 | 2.280 | 0.083 | 0.189 | 0.169 |
| 320 | 2.735 | 2.728 | 2.280 | 0.085 | 0.194 | 0.169 |
| 330 | 2.745 | 2.734 | 2.280 | 0.087 | 0.198 | 0.169 |
| 340 | 2.755 | 2.740 | 2.280 | 0.090 | 0.202 | 0.169 |
| 350 | 2.744 | 2.746 | 2.280 | 0.092 | 0.206 | 0.169 |
| 360 | 2.736 | 2.752 | 2.280 | 0.094 | 0.210 | 0.169 |
| 370 | 2.740 | 2.758 | 2.280 | 0.096 | 0.213 | 0.169 |
| 380 | 2.761 | 2.764 | 2.280 | 0.098 | 0.217 | 0.169 |
| 390 | 2.752 | 2.770 | 2.280 | 0.100 | 0.221 | 0.169 |
| 400 | 2.785 | 2.776 | 2.280 | 0.103 | 0.224 | 0.169 |
| 410 | 2.752 | 2.781 | 2.280 | 0.105 | 0.228 | 0.169 |
| 420 | 2.759 | 2.787 | 2.280 | 0.107 | 0.231 | 0.169 |
| 430 | 2.779 | 2.792 | 2.280 | 0.109 | 0.234 | 0.169 |
| 440 | 2.774 | 2.797 | 2.280 | 0.111 | 0.238 | 0.169 |
| 450 | 2.794 | 2.803 | 2.280 | 0.113 | 0.241 | 0.169 |
| 460 | 2.800 | 2.808 | 2.280 | 0.115 | 0.244 | 0.169 |



|             |                       |       |       |       |       |       |       |                                      |                                     |
|-------------|-----------------------|-------|-------|-------|-------|-------|-------|--------------------------------------|-------------------------------------|
|             |                       | 470   | 2.796 | 2.813 | 2.280 | 0.117 | 0.247 | 0.169                                |                                     |
|             |                       | 480   | 2.810 | 2.818 | 2.280 | 0.119 | 0.250 | 0.169                                |                                     |
|             |                       | 490   | 2.808 | 2.822 | 2.280 | 0.121 | 0.253 | 0.169                                |                                     |
|             |                       | 500   | 2.815 | 2.827 | 2.280 | 0.123 | 0.256 | 0.169                                |                                     |
|             |                       | 510   | 2.820 | 2.832 | 2.280 | 0.125 | 0.259 | 0.169                                |                                     |
|             |                       | 520   | 2.815 | 2.837 | 2.280 | 0.126 | 0.261 | 0.169                                |                                     |
|             |                       | 530   | 2.798 | 2.841 | 2.280 | 0.128 | 0.264 | 0.169                                |                                     |
|             |                       | 540   | 2.838 | 2.846 | 2.280 | 0.130 | 0.267 | 0.169                                |                                     |
|             |                       | 550   | 2.850 | 2.850 | 2.280 | 0.132 | 0.269 | 0.169                                |                                     |
|             |                       | 560   | 2.858 | 2.854 | 2.280 | 0.134 | 0.272 | 0.169                                |                                     |
|             |                       | 570   | 2.857 | 2.859 | 2.280 | 0.136 | 0.274 | 0.169                                |                                     |
|             |                       | 580   | 2.833 | 2.863 | 2.280 | 0.137 | 0.276 | 0.169                                |                                     |
|             |                       | 590   | 2.874 | 2.867 | 2.280 | 0.139 | 0.279 | 0.169                                |                                     |
|             |                       | 600   | 2.855 | 2.871 | 2.280 | 0.141 | 0.281 | 0.169                                |                                     |
| GFET<br>#M9 | $c^{(CEA)} = 2$<br>nM | -50   | 2.239 | 2.260 | -     | -     | -     | -                                    | $\bar{c}^{(CEA)} \approx 1.6522$ nM |
|             |                       | -40   | 2.252 | 2.260 |       |       |       |                                      |                                     |
|             |                       | -30   | 2.274 | 2.260 |       |       |       |                                      |                                     |
|             |                       | -20   | 2.267 | 2.260 |       |       |       |                                      |                                     |
|             |                       | -10   | 2.264 | 2.260 |       |       |       |                                      |                                     |
|             | 0                     | 2.264 | 2.260 | 2.260 | 0.000 | 0.000 | 0.000 |                                      |                                     |
|             | 10                    | 2.356 | 2.299 | 2.260 | 0.002 | 0.016 | 0.022 |                                      |                                     |
|             | 20                    | 2.402 | 2.336 | 2.260 | 0.004 | 0.031 | 0.042 |                                      |                                     |
|             | 30                    | 2.421 | 2.371 | 2.260 | 0.006 | 0.046 | 0.060 |                                      |                                     |
|             | 40                    | 2.432 | 2.403 | 2.260 | 0.007 | 0.060 | 0.076 |                                      |                                     |
|             | 50                    | 2.486 | 2.434 | 2.260 | 0.009 | 0.074 | 0.091 |                                      |                                     |
|             | 60                    | 2.518 | 2.463 | 2.260 | 0.011 | 0.087 | 0.104 |                                      |                                     |
|             | 70                    | 2.536 | 2.490 | 2.260 | 0.013 | 0.100 | 0.117 |                                      |                                     |
|             | 80                    | 2.550 | 2.515 | 2.260 | 0.014 | 0.112 | 0.128 |                                      |                                     |
|             | 90                    | 2.582 | 2.539 | 2.260 | 0.016 | 0.124 | 0.138 |                                      |                                     |
|             | 100                   | 2.586 | 2.562 | 2.260 | 0.018 | 0.136 | 0.148 | $\bar{c}^{(AFP)} \approx 25.1456$ nM |                                     |
|             | 110                   | 2.615 | 2.583 | 2.260 | 0.020 | 0.147 | 0.156 |                                      |                                     |
|             | 120                   | 2.583 | 2.603 | 2.260 | 0.021 | 0.158 | 0.164 | $\bar{c}^{(PTH)} \approx 6.9113$ nM  |                                     |
|             | 130                   | 2.624 | 2.623 | 2.260 | 0.023 | 0.169 | 0.171 |                                      |                                     |
|             | 140                   | 2.663 | 2.641 | 2.260 | 0.025 | 0.179 | 0.177 |                                      |                                     |
|             | 150                   | 2.652 | 2.658 | 2.260 | 0.026 | 0.189 | 0.183 |                                      |                                     |
|             | 160                   | 2.665 | 2.675 | 2.260 | 0.028 | 0.198 | 0.188 |                                      |                                     |
|             | 170                   | 2.693 | 2.690 | 2.260 | 0.030 | 0.207 | 0.193 |                                      |                                     |
|             | 180                   | 2.704 | 2.705 | 2.260 | 0.031 | 0.216 | 0.197 |                                      |                                     |
|             | 190                   | 2.691 | 2.719 | 2.260 | 0.033 | 0.225 | 0.201 |                                      |                                     |
|             | 200                   | 2.728 | 2.733 | 2.260 | 0.034 | 0.233 | 0.205 |                                      |                                     |
| 210         | 2.712                 | 2.746 | 2.260 | 0.036 | 0.241 | 0.208 |       |                                      |                                     |
| 220         | 2.737                 | 2.758 | 2.260 | 0.037 | 0.249 | 0.211 |       |                                      |                                     |
| 230         | 2.763                 | 2.770 | 2.260 | 0.039 | 0.256 | 0.214 |       |                                      |                                     |
| 240         | 2.742                 | 2.781 | 2.260 | 0.041 | 0.264 | 0.217 |       |                                      |                                     |
| 250         | 2.764                 | 2.792 | 2.260 | 0.042 | 0.271 | 0.219 |       |                                      |                                     |
| 260         | 2.786                 | 2.802 | 2.260 | 0.044 | 0.277 | 0.221 |       |                                      |                                     |

|              |                        |     |       |       |       |       |       |       |                                         |
|--------------|------------------------|-----|-------|-------|-------|-------|-------|-------|-----------------------------------------|
|              |                        | 270 | 2.792 | 2.812 | 2.260 | 0.045 | 0.284 | 0.223 |                                         |
|              |                        | 280 | 2.775 | 2.821 | 2.260 | 0.046 | 0.290 | 0.224 |                                         |
|              |                        | 290 | 2.807 | 2.830 | 2.260 | 0.048 | 0.296 | 0.226 |                                         |
|              |                        | 300 | 2.817 | 2.839 | 2.260 | 0.049 | 0.302 | 0.227 |                                         |
|              |                        | 310 | 2.802 | 2.848 | 2.260 | 0.051 | 0.308 | 0.229 |                                         |
|              |                        | 320 | 2.832 | 2.856 | 2.260 | 0.052 | 0.314 | 0.230 |                                         |
|              |                        | 330 | 2.831 | 2.864 | 2.260 | 0.054 | 0.319 | 0.231 |                                         |
|              |                        | 340 | 2.865 | 2.871 | 2.260 | 0.055 | 0.324 | 0.232 |                                         |
|              |                        | 350 | 2.850 | 2.878 | 2.260 | 0.056 | 0.329 | 0.233 |                                         |
|              |                        | 360 | 2.862 | 2.885 | 2.260 | 0.058 | 0.334 | 0.234 |                                         |
|              |                        | 370 | 2.855 | 2.892 | 2.260 | 0.059 | 0.339 | 0.234 |                                         |
|              |                        | 380 | 2.879 | 2.899 | 2.260 | 0.060 | 0.343 | 0.235 |                                         |
|              |                        | 390 | 2.856 | 2.905 | 2.260 | 0.062 | 0.348 | 0.236 |                                         |
|              |                        | 400 | 2.900 | 2.911 | 2.260 | 0.063 | 0.352 | 0.236 |                                         |
|              |                        | 410 | 2.882 | 2.917 | 2.260 | 0.064 | 0.356 | 0.237 |                                         |
|              |                        | 420 | 2.885 | 2.923 | 2.260 | 0.066 | 0.360 | 0.237 |                                         |
|              |                        | 430 | 2.890 | 2.928 | 2.260 | 0.067 | 0.364 | 0.237 |                                         |
|              |                        | 440 | 2.931 | 2.934 | 2.260 | 0.068 | 0.367 | 0.238 |                                         |
|              |                        | 450 | 2.951 | 2.939 | 2.260 | 0.069 | 0.371 | 0.238 |                                         |
|              |                        | 460 | 2.942 | 2.944 | 2.260 | 0.071 | 0.374 | 0.239 |                                         |
|              |                        | 470 | 2.941 | 2.949 | 2.260 | 0.072 | 0.378 | 0.239 |                                         |
|              |                        | 480 | 2.920 | 2.953 | 2.260 | 0.073 | 0.381 | 0.239 |                                         |
|              |                        | 490 | 2.934 | 2.958 | 2.260 | 0.074 | 0.384 | 0.239 |                                         |
|              |                        | 500 | 2.940 | 2.962 | 2.260 | 0.076 | 0.387 | 0.239 |                                         |
|              |                        | 510 | 2.930 | 2.967 | 2.260 | 0.077 | 0.390 | 0.240 |                                         |
|              |                        | 520 | 2.935 | 2.971 | 2.260 | 0.078 | 0.393 | 0.240 |                                         |
|              |                        | 530 | 2.957 | 2.975 | 2.260 | 0.079 | 0.396 | 0.240 |                                         |
|              |                        | 540 | 2.932 | 2.979 | 2.260 | 0.080 | 0.398 | 0.240 |                                         |
|              |                        | 550 | 2.995 | 2.983 | 2.260 | 0.081 | 0.401 | 0.240 |                                         |
|              |                        | 560 | 2.979 | 2.986 | 2.260 | 0.083 | 0.403 | 0.240 |                                         |
|              |                        | 570 | 2.974 | 2.990 | 2.260 | 0.084 | 0.406 | 0.241 |                                         |
|              |                        | 580 | 2.969 | 2.993 | 2.260 | 0.085 | 0.408 | 0.241 |                                         |
|              |                        | 590 | 2.978 | 2.997 | 2.260 | 0.086 | 0.410 | 0.241 |                                         |
|              |                        | 600 | 2.995 | 3.000 | 2.260 | 0.087 | 0.412 | 0.241 |                                         |
| GFET<br>#M10 | $c^{(CEA)} = 2$<br>nM  | -50 | 2.281 | 2.266 | -     | -     | -     | -     | $\bar{c}^{(CEA)} \approx$<br>1.9288 nM  |
|              |                        | -40 | 2.268 | 2.266 |       |       |       |       |                                         |
|              |                        | -30 | 2.250 | 2.266 |       |       |       |       |                                         |
|              |                        | -20 | 2.254 | 2.266 |       |       |       |       |                                         |
|              |                        | -10 | 2.271 | 2.266 |       |       |       |       |                                         |
|              | $c^{(AFP)} = 50$<br>nM | 0   | 2.271 | 2.266 | 2.266 | 0.000 | 0.000 | 0.000 | $\bar{c}^{(AFP)} \approx$<br>26.1044 nM |
|              |                        | 10  | 2.343 | 2.314 | 2.266 | 0.002 | 0.016 | 0.030 |                                         |
|              |                        | 20  | 2.411 | 2.358 | 2.266 | 0.005 | 0.031 | 0.056 |                                         |
|              | $c^{(PTH)} = 5$<br>nM  | 30  | 2.439 | 2.397 | 2.266 | 0.007 | 0.046 | 0.078 | $\bar{c}^{(PTH)} \approx$<br>12.2113nM  |
|              |                        | 40  | 2.477 | 2.433 | 2.266 | 0.010 | 0.061 | 0.097 |                                         |
|              |                        | 50  | 2.496 | 2.466 | 2.266 | 0.012 | 0.075 | 0.113 |                                         |
|              |                        | 60  | 2.524 | 2.496 | 2.266 | 0.014 | 0.088 | 0.128 |                                         |

|     |       |       |       |       |       |       |
|-----|-------|-------|-------|-------|-------|-------|
| 70  | 2.549 | 2.523 | 2.266 | 0.017 | 0.101 | 0.140 |
| 80  | 2.574 | 2.549 | 2.266 | 0.019 | 0.113 | 0.150 |
| 90  | 2.565 | 2.572 | 2.266 | 0.021 | 0.126 | 0.159 |
| 100 | 2.599 | 2.594 | 2.266 | 0.023 | 0.137 | 0.167 |
| 110 | 2.633 | 2.614 | 2.266 | 0.026 | 0.148 | 0.174 |
| 120 | 2.647 | 2.633 | 2.266 | 0.028 | 0.159 | 0.180 |
| 130 | 2.646 | 2.651 | 2.266 | 0.030 | 0.170 | 0.185 |
| 140 | 2.694 | 2.667 | 2.266 | 0.032 | 0.180 | 0.189 |
| 150 | 2.670 | 2.683 | 2.266 | 0.034 | 0.190 | 0.193 |
| 160 | 2.664 | 2.698 | 2.266 | 0.037 | 0.199 | 0.196 |
| 170 | 2.695 | 2.712 | 2.266 | 0.039 | 0.209 | 0.199 |
| 180 | 2.706 | 2.725 | 2.266 | 0.041 | 0.217 | 0.201 |
| 190 | 2.721 | 2.738 | 2.266 | 0.043 | 0.226 | 0.203 |
| 200 | 2.739 | 2.750 | 2.266 | 0.045 | 0.234 | 0.205 |
| 210 | 2.734 | 2.761 | 2.266 | 0.047 | 0.242 | 0.207 |
| 220 | 2.762 | 2.773 | 2.266 | 0.049 | 0.250 | 0.208 |
| 230 | 2.776 | 2.783 | 2.266 | 0.051 | 0.257 | 0.209 |
| 240 | 2.809 | 2.793 | 2.266 | 0.053 | 0.264 | 0.210 |
| 250 | 2.766 | 2.803 | 2.266 | 0.055 | 0.271 | 0.211 |
| 260 | 2.798 | 2.812 | 2.266 | 0.057 | 0.278 | 0.212 |
| 270 | 2.780 | 2.821 | 2.266 | 0.058 | 0.285 | 0.212 |
| 280 | 2.819 | 2.830 | 2.266 | 0.060 | 0.291 | 0.213 |
| 290 | 2.853 | 2.838 | 2.266 | 0.062 | 0.297 | 0.213 |
| 300 | 2.804 | 2.846 | 2.266 | 0.064 | 0.303 | 0.214 |
| 310 | 2.831 | 2.854 | 2.266 | 0.066 | 0.308 | 0.214 |
| 320 | 2.837 | 2.862 | 2.266 | 0.068 | 0.314 | 0.214 |
| 330 | 2.822 | 2.869 | 2.266 | 0.069 | 0.319 | 0.215 |
| 340 | 2.847 | 2.876 | 2.266 | 0.071 | 0.324 | 0.215 |
| 350 | 2.870 | 2.883 | 2.266 | 0.073 | 0.329 | 0.215 |
| 360 | 2.854 | 2.890 | 2.266 | 0.075 | 0.334 | 0.215 |
| 370 | 2.872 | 2.896 | 2.266 | 0.076 | 0.338 | 0.215 |
| 380 | 2.878 | 2.902 | 2.266 | 0.078 | 0.343 | 0.216 |
| 390 | 2.866 | 2.908 | 2.266 | 0.080 | 0.347 | 0.216 |
| 400 | 2.877 | 2.914 | 2.266 | 0.081 | 0.351 | 0.216 |
| 410 | 2.894 | 2.920 | 2.266 | 0.083 | 0.355 | 0.216 |
| 420 | 2.875 | 2.925 | 2.266 | 0.085 | 0.359 | 0.216 |
| 430 | 2.915 | 2.931 | 2.266 | 0.086 | 0.363 | 0.216 |
| 440 | 2.904 | 2.936 | 2.266 | 0.088 | 0.366 | 0.216 |
| 450 | 2.925 | 2.941 | 2.266 | 0.090 | 0.370 | 0.216 |
| 460 | 2.931 | 2.946 | 2.266 | 0.091 | 0.373 | 0.216 |
| 470 | 2.899 | 2.951 | 2.266 | 0.093 | 0.376 | 0.216 |
| 480 | 2.940 | 2.956 | 2.266 | 0.094 | 0.379 | 0.216 |
| 490 | 2.938 | 2.960 | 2.266 | 0.096 | 0.382 | 0.216 |
| 500 | 2.935 | 2.965 | 2.266 | 0.097 | 0.385 | 0.216 |
| 510 | 2.956 | 2.969 | 2.266 | 0.099 | 0.388 | 0.216 |
| 520 | 2.950 | 2.973 | 2.266 | 0.100 | 0.391 | 0.216 |

|              |                                                                           |       |       |       |       |       |       |       |                                                                                                                     |
|--------------|---------------------------------------------------------------------------|-------|-------|-------|-------|-------|-------|-------|---------------------------------------------------------------------------------------------------------------------|
|              |                                                                           | 530   | 2.985 | 2.977 | 2.266 | 0.102 | 0.394 | 0.216 |                                                                                                                     |
|              |                                                                           | 540   | 2.978 | 2.981 | 2.266 | 0.103 | 0.396 | 0.216 |                                                                                                                     |
|              |                                                                           | 550   | 2.975 | 2.985 | 2.266 | 0.105 | 0.399 | 0.216 |                                                                                                                     |
|              |                                                                           | 560   | 2.950 | 2.989 | 2.266 | 0.106 | 0.401 | 0.216 |                                                                                                                     |
|              |                                                                           | 570   | 2.987 | 2.993 | 2.266 | 0.107 | 0.403 | 0.216 |                                                                                                                     |
|              |                                                                           | 580   | 3.009 | 2.996 | 2.266 | 0.109 | 0.405 | 0.216 |                                                                                                                     |
|              |                                                                           | 590   | 3.005 | 3.000 | 2.266 | 0.110 | 0.408 | 0.216 |                                                                                                                     |
|              |                                                                           | 600   | 2.991 | 3.003 | 2.266 | 0.112 | 0.410 | 0.216 |                                                                                                                     |
| GFET<br>#M11 | $c^{(CEA)} = 2$<br>nM<br>$c^{(AFP)} = 50$<br>nM<br>$c^{(PTH)} = 20$<br>nM | -50   | 2.242 | 2.271 | -     | -     | -     | -     | $\bar{c}^{(CEA)} \approx 1.5166$ nM<br>$\bar{c}^{(AFP)} \approx 26.3665$ nM<br>$\bar{c}^{(PTH)} \approx 39.6532$ nM |
|              |                                                                           | -40   | 2.290 | 2.271 |       |       |       |       |                                                                                                                     |
|              |                                                                           | -30   | 2.271 | 2.271 |       |       |       |       |                                                                                                                     |
|              |                                                                           | -20   | 2.278 | 2.271 |       |       |       |       |                                                                                                                     |
|              |                                                                           | -10   | 2.271 | 2.271 |       |       |       |       |                                                                                                                     |
|              |                                                                           | 0     | 2.271 | 2.271 | 2.271 | 0.000 | 0.000 | 0.000 |                                                                                                                     |
|              |                                                                           | 10    | 2.360 | 2.351 | 2.271 | 0.002 | 0.019 | 0.059 |                                                                                                                     |
|              |                                                                           | 20    | 2.423 | 2.410 | 2.271 | 0.004 | 0.037 | 0.098 |                                                                                                                     |
|              |                                                                           | 30    | 2.501 | 2.454 | 2.271 | 0.006 | 0.054 | 0.123 |                                                                                                                     |
|              |                                                                           | 40    | 2.511 | 2.489 | 2.271 | 0.008 | 0.071 | 0.140 |                                                                                                                     |
|              |                                                                           | 50    | 2.527 | 2.518 | 2.271 | 0.010 | 0.087 | 0.150 |                                                                                                                     |
|              |                                                                           | 60    | 2.560 | 2.543 | 2.271 | 0.012 | 0.102 | 0.157 |                                                                                                                     |
|              |                                                                           | 70    | 2.583 | 2.565 | 2.271 | 0.014 | 0.117 | 0.162 |                                                                                                                     |
|              |                                                                           | 80    | 2.607 | 2.584 | 2.271 | 0.016 | 0.132 | 0.165 |                                                                                                                     |
|              |                                                                           | 90    | 2.634 | 2.602 | 2.271 | 0.018 | 0.146 | 0.167 |                                                                                                                     |
|              |                                                                           | 100   | 2.614 | 2.619 | 2.271 | 0.020 | 0.160 | 0.168 |                                                                                                                     |
|              |                                                                           | 110   | 2.647 | 2.635 | 2.271 | 0.022 | 0.173 | 0.169 |                                                                                                                     |
|              |                                                                           | 120   | 2.677 | 2.650 | 2.271 | 0.024 | 0.185 | 0.169 |                                                                                                                     |
|              |                                                                           | 130   | 2.671 | 2.664 | 2.271 | 0.026 | 0.198 | 0.170 |                                                                                                                     |
|              |                                                                           | 140   | 2.680 | 2.678 | 2.271 | 0.028 | 0.209 | 0.170 |                                                                                                                     |
|              |                                                                           | 150   | 2.687 | 2.692 | 2.271 | 0.030 | 0.221 | 0.170 |                                                                                                                     |
|              |                                                                           | 160   | 2.715 | 2.705 | 2.271 | 0.032 | 0.232 | 0.170 |                                                                                                                     |
|              |                                                                           | 170   | 2.738 | 2.717 | 2.271 | 0.034 | 0.242 | 0.170 |                                                                                                                     |
|              |                                                                           | 180   | 2.762 | 2.729 | 2.271 | 0.036 | 0.253 | 0.170 |                                                                                                                     |
|              |                                                                           | 190   | 2.748 | 2.741 | 2.271 | 0.037 | 0.262 | 0.170 |                                                                                                                     |
|              |                                                                           | 200   | 2.759 | 2.752 | 2.271 | 0.039 | 0.272 | 0.170 |                                                                                                                     |
|              |                                                                           | 210   | 2.769 | 2.763 | 2.271 | 0.041 | 0.281 | 0.170 |                                                                                                                     |
|              |                                                                           | 220   | 2.775 | 2.774 | 2.271 | 0.043 | 0.290 | 0.170 |                                                                                                                     |
|              |                                                                           | 230   | 2.766 | 2.784 | 2.271 | 0.045 | 0.299 | 0.170 |                                                                                                                     |
|              |                                                                           | 240   | 2.803 | 2.795 | 2.271 | 0.046 | 0.307 | 0.170 |                                                                                                                     |
|              |                                                                           | 250   | 2.803 | 2.804 | 2.271 | 0.048 | 0.315 | 0.170 |                                                                                                                     |
|              |                                                                           | 260   | 2.843 | 2.814 | 2.271 | 0.050 | 0.323 | 0.170 |                                                                                                                     |
| 270          | 2.829                                                                     | 2.823 | 2.271 | 0.051 | 0.330 | 0.170 |       |       |                                                                                                                     |
| 280          | 2.807                                                                     | 2.832 | 2.271 | 0.053 | 0.338 | 0.170 |       |       |                                                                                                                     |
| 290          | 2.818                                                                     | 2.841 | 2.271 | 0.055 | 0.345 | 0.170 |       |       |                                                                                                                     |
| 300          | 2.830                                                                     | 2.849 | 2.271 | 0.056 | 0.351 | 0.170 |       |       |                                                                                                                     |
| 310          | 2.846                                                                     | 2.857 | 2.271 | 0.058 | 0.358 | 0.170 |       |       |                                                                                                                     |
| 320          | 2.879                                                                     | 2.865 | 2.271 | 0.060 | 0.364 | 0.170 |       |       |                                                                                                                     |

|              |                        |       |       |       |       |       |       |                                         |                                        |                                          |
|--------------|------------------------|-------|-------|-------|-------|-------|-------|-----------------------------------------|----------------------------------------|------------------------------------------|
|              |                        | 330   | 2.858 | 2.873 | 2.271 | 0.061 | 0.370 | 0.170                                   |                                        |                                          |
|              |                        | 340   | 2.866 | 2.880 | 2.271 | 0.063 | 0.376 | 0.170                                   |                                        |                                          |
|              |                        | 350   | 2.868 | 2.887 | 2.271 | 0.065 | 0.382 | 0.170                                   |                                        |                                          |
|              |                        | 360   | 2.868 | 2.894 | 2.271 | 0.066 | 0.387 | 0.170                                   |                                        |                                          |
|              |                        | 370   | 2.887 | 2.901 | 2.271 | 0.068 | 0.392 | 0.170                                   |                                        |                                          |
|              |                        | 380   | 2.868 | 2.908 | 2.271 | 0.069 | 0.398 | 0.170                                   |                                        |                                          |
|              |                        | 390   | 2.899 | 2.914 | 2.271 | 0.071 | 0.402 | 0.170                                   |                                        |                                          |
|              |                        | 400   | 2.929 | 2.921 | 2.271 | 0.072 | 0.407 | 0.170                                   |                                        |                                          |
|              |                        | 410   | 2.904 | 2.927 | 2.271 | 0.074 | 0.412 | 0.170                                   |                                        |                                          |
|              |                        | 420   | 2.904 | 2.933 | 2.271 | 0.075 | 0.416 | 0.170                                   |                                        |                                          |
|              |                        | 430   | 2.909 | 2.938 | 2.271 | 0.077 | 0.420 | 0.170                                   |                                        |                                          |
|              |                        | 440   | 2.936 | 2.944 | 2.271 | 0.078 | 0.425 | 0.170                                   |                                        |                                          |
|              |                        | 450   | 2.945 | 2.950 | 2.271 | 0.080 | 0.429 | 0.170                                   |                                        |                                          |
|              |                        | 460   | 2.957 | 2.955 | 2.271 | 0.081 | 0.432 | 0.170                                   |                                        |                                          |
|              |                        | 470   | 2.933 | 2.960 | 2.271 | 0.083 | 0.436 | 0.170                                   |                                        |                                          |
|              |                        | 480   | 2.944 | 2.965 | 2.271 | 0.084 | 0.440 | 0.170                                   |                                        |                                          |
|              |                        | 490   | 2.982 | 2.970 | 2.271 | 0.086 | 0.443 | 0.170                                   |                                        |                                          |
|              |                        | 500   | 2.964 | 2.975 | 2.271 | 0.087 | 0.447 | 0.170                                   |                                        |                                          |
|              |                        | 510   | 2.975 | 2.979 | 2.271 | 0.088 | 0.450 | 0.170                                   |                                        |                                          |
|              |                        | 520   | 2.958 | 2.984 | 2.271 | 0.090 | 0.453 | 0.170                                   |                                        |                                          |
|              |                        | 530   | 2.987 | 2.988 | 2.271 | 0.091 | 0.456 | 0.170                                   |                                        |                                          |
|              |                        | 540   | 2.987 | 2.992 | 2.271 | 0.092 | 0.459 | 0.170                                   |                                        |                                          |
|              |                        | 550   | 2.964 | 2.997 | 2.271 | 0.094 | 0.462 | 0.170                                   |                                        |                                          |
|              |                        | 560   | 2.961 | 3.001 | 2.271 | 0.095 | 0.464 | 0.170                                   |                                        |                                          |
|              |                        | 570   | 2.980 | 3.005 | 2.271 | 0.096 | 0.467 | 0.170                                   |                                        |                                          |
|              |                        | 580   | 2.956 | 3.008 | 2.271 | 0.098 | 0.470 | 0.170                                   |                                        |                                          |
|              |                        | 590   | 2.968 | 3.012 | 2.271 | 0.099 | 0.472 | 0.170                                   |                                        |                                          |
|              |                        | 600   | 2.994 | 3.016 | 2.271 | 0.100 | 0.474 | 0.170                                   |                                        |                                          |
| GFET<br>#M12 | $c^{(CEA)} = 2$<br>nM  | -50   | 2.269 | 2.272 | -     | -     | -     | -                                       | $\bar{c}^{(CEA)} \approx$<br>1.8123 nM |                                          |
|              |                        | -40   | 2.275 | 2.272 |       |       |       |                                         |                                        |                                          |
|              |                        | -30   | 2.264 | 2.272 |       |       |       |                                         |                                        |                                          |
|              |                        | -20   | 2.264 | 2.272 |       |       |       |                                         |                                        |                                          |
|              |                        | -10   | 2.280 | 2.272 |       |       |       |                                         |                                        |                                          |
|              | 0                      | 2.280 | 2.272 | 2.272 | 0.000 | 0.000 | 0.000 | $\bar{c}^{(AFP)} \approx$<br>29.5156 nM |                                        |                                          |
|              | $c^{(AFP)} = 50$<br>nM | 10    | 2.370 | 2.393 | 2.272 | 0.002 | 0.020 | 0.099                                   |                                        |                                          |
|              |                        | 20    | 2.454 | 2.448 | 2.272 | 0.004 | 0.038 | 0.133                                   |                                        |                                          |
|              | $c^{(PTH)} = 50$<br>nM | 30    | 2.487 | 2.479 | 2.272 | 0.007 | 0.057 | 0.144                                   |                                        | $\bar{c}^{(PTH)} \approx$<br>103.2442 nM |
|              |                        | 40    | 2.514 | 2.503 | 2.272 | 0.009 | 0.074 | 0.148                                   |                                        |                                          |
|              |                        | 50    | 2.536 | 2.523 | 2.272 | 0.011 | 0.091 | 0.149                                   |                                        |                                          |
|              |                        | 60    | 2.569 | 2.542 | 2.272 | 0.013 | 0.107 | 0.150                                   |                                        |                                          |
|              |                        | 70    | 2.587 | 2.560 | 2.272 | 0.015 | 0.123 | 0.150                                   |                                        |                                          |
|              |                        | 80    | 2.598 | 2.577 | 2.272 | 0.017 | 0.138 | 0.150                                   |                                        |                                          |
|              |                        | 90    | 2.626 | 2.594 | 2.272 | 0.020 | 0.152 | 0.150                                   |                                        |                                          |
|              |                        | 100   | 2.676 | 2.610 | 2.272 | 0.022 | 0.166 | 0.150                                   |                                        |                                          |
|              |                        | 110   | 2.665 | 2.625 | 2.272 | 0.024 | 0.180 | 0.150                                   |                                        |                                          |
| 120          |                        | 2.636 | 2.640 | 2.272 | 0.026 | 0.192 | 0.150 |                                         |                                        |                                          |

|     |       |       |       |       |       |       |
|-----|-------|-------|-------|-------|-------|-------|
| 130 | 2.668 | 2.655 | 2.272 | 0.028 | 0.205 | 0.150 |
| 140 | 2.680 | 2.669 | 2.272 | 0.030 | 0.217 | 0.150 |
| 150 | 2.711 | 2.682 | 2.272 | 0.032 | 0.228 | 0.150 |
| 160 | 2.700 | 2.695 | 2.272 | 0.034 | 0.239 | 0.150 |
| 170 | 2.719 | 2.708 | 2.272 | 0.036 | 0.250 | 0.150 |
| 180 | 2.711 | 2.720 | 2.272 | 0.037 | 0.260 | 0.150 |
| 190 | 2.709 | 2.732 | 2.272 | 0.039 | 0.270 | 0.150 |
| 200 | 2.740 | 2.743 | 2.272 | 0.041 | 0.280 | 0.150 |
| 210 | 2.755 | 2.754 | 2.272 | 0.043 | 0.289 | 0.150 |
| 220 | 2.798 | 2.765 | 2.272 | 0.045 | 0.298 | 0.150 |
| 230 | 2.767 | 2.775 | 2.272 | 0.047 | 0.306 | 0.150 |
| 240 | 2.770 | 2.785 | 2.272 | 0.049 | 0.314 | 0.150 |
| 250 | 2.767 | 2.795 | 2.272 | 0.050 | 0.322 | 0.150 |
| 260 | 2.822 | 2.804 | 2.272 | 0.052 | 0.330 | 0.150 |
| 270 | 2.811 | 2.813 | 2.272 | 0.054 | 0.337 | 0.150 |
| 280 | 2.811 | 2.822 | 2.272 | 0.056 | 0.344 | 0.150 |
| 290 | 2.811 | 2.830 | 2.272 | 0.057 | 0.351 | 0.150 |
| 300 | 2.826 | 2.838 | 2.272 | 0.059 | 0.357 | 0.150 |
| 310 | 2.849 | 2.846 | 2.272 | 0.061 | 0.364 | 0.150 |
| 320 | 2.836 | 2.854 | 2.272 | 0.062 | 0.370 | 0.150 |
| 330 | 2.841 | 2.862 | 2.272 | 0.064 | 0.375 | 0.150 |
| 340 | 2.860 | 2.869 | 2.272 | 0.066 | 0.381 | 0.150 |
| 350 | 2.857 | 2.876 | 2.272 | 0.067 | 0.386 | 0.150 |
| 360 | 2.888 | 2.883 | 2.272 | 0.069 | 0.391 | 0.150 |
| 370 | 2.880 | 2.889 | 2.272 | 0.071 | 0.396 | 0.150 |
| 380 | 2.873 | 2.895 | 2.272 | 0.072 | 0.401 | 0.150 |
| 390 | 2.860 | 2.902 | 2.272 | 0.074 | 0.406 | 0.150 |
| 400 | 2.890 | 2.908 | 2.272 | 0.075 | 0.410 | 0.150 |
| 410 | 2.894 | 2.913 | 2.272 | 0.077 | 0.415 | 0.150 |
| 420 | 2.914 | 2.919 | 2.272 | 0.078 | 0.419 | 0.150 |
| 430 | 2.906 | 2.925 | 2.272 | 0.080 | 0.423 | 0.150 |
| 440 | 2.895 | 2.930 | 2.272 | 0.081 | 0.426 | 0.150 |
| 450 | 2.926 | 2.935 | 2.272 | 0.083 | 0.430 | 0.150 |
| 460 | 2.928 | 2.940 | 2.272 | 0.084 | 0.434 | 0.150 |
| 470 | 2.903 | 2.945 | 2.272 | 0.086 | 0.437 | 0.150 |
| 480 | 2.933 | 2.950 | 2.272 | 0.087 | 0.440 | 0.150 |
| 490 | 2.955 | 2.954 | 2.272 | 0.089 | 0.443 | 0.150 |
| 500 | 2.945 | 2.959 | 2.272 | 0.090 | 0.446 | 0.150 |
| 510 | 2.935 | 2.963 | 2.272 | 0.091 | 0.449 | 0.150 |
| 520 | 2.947 | 2.967 | 2.272 | 0.093 | 0.452 | 0.150 |
| 530 | 2.945 | 2.971 | 2.272 | 0.094 | 0.455 | 0.150 |
| 540 | 2.972 | 2.975 | 2.272 | 0.096 | 0.457 | 0.150 |
| 550 | 2.942 | 2.979 | 2.272 | 0.097 | 0.460 | 0.150 |
| 560 | 2.978 | 2.983 | 2.272 | 0.098 | 0.462 | 0.150 |
| 570 | 2.978 | 2.986 | 2.272 | 0.100 | 0.465 | 0.150 |
| 580 | 2.956 | 2.990 | 2.272 | 0.101 | 0.467 | 0.150 |

|              |                       |       |       |       |       |       |       |       |                                      |
|--------------|-----------------------|-------|-------|-------|-------|-------|-------|-------|--------------------------------------|
|              |                       | 590   | 2.977 | 2.993 | 2.272 | 0.102 | 0.469 | 0.150 |                                      |
|              |                       | 600   | 2.995 | 2.997 | 2.272 | 0.103 | 0.471 | 0.150 |                                      |
| GFET<br>#M13 | $c^{(CEA)} = 2$<br>nM | -50   | 2.285 | 2.274 | -     | -     | -     | -     | $\bar{c}^{(CEA)} \approx 1.7132$ nM  |
|              |                       | -40   | 2.274 | 2.274 |       |       |       |       |                                      |
|              |                       | -30   | 2.256 | 2.274 |       |       |       |       |                                      |
|              |                       | -20   | 2.258 | 2.274 |       |       |       |       |                                      |
|              |                       | -10   | 2.285 | 2.274 |       |       |       |       |                                      |
|              |                       | 0     | 2.285 | 2.274 |       |       |       |       |                                      |
|              |                       | 10    | 2.374 | 2.326 | 2.274 | 0.002 | 0.035 | 0.015 |                                      |
|              |                       | 20    | 2.418 | 2.373 | 2.274 | 0.005 | 0.067 | 0.028 |                                      |
|              |                       | 30    | 2.466 | 2.418 | 2.274 | 0.007 | 0.098 | 0.040 |                                      |
|              |                       | 40    | 2.527 | 2.459 | 2.274 | 0.009 | 0.126 | 0.050 |                                      |
|              |                       | 50    | 2.500 | 2.497 | 2.274 | 0.011 | 0.153 | 0.060 |                                      |
|              |                       | 60    | 2.566 | 2.533 | 2.274 | 0.013 | 0.177 | 0.068 |                                      |
|              |                       | 70    | 2.582 | 2.566 | 2.274 | 0.015 | 0.201 | 0.076 |                                      |
|              |                       | 80    | 2.596 | 2.597 | 2.274 | 0.018 | 0.222 | 0.083 |                                      |
|              |                       | 90    | 2.629 | 2.625 | 2.274 | 0.020 | 0.243 | 0.089 |                                      |
|              |                       | 100   | 2.653 | 2.652 | 2.274 | 0.022 | 0.262 | 0.095 |                                      |
|              |                       | 110   | 2.666 | 2.677 | 2.274 | 0.024 | 0.279 | 0.100 |                                      |
|              |                       | 120   | 2.702 | 2.700 | 2.274 | 0.026 | 0.296 | 0.105 |                                      |
|              |                       | 130   | 2.719 | 2.722 | 2.274 | 0.028 | 0.311 | 0.109 |                                      |
|              |                       | 140   | 2.709 | 2.742 | 2.274 | 0.030 | 0.326 | 0.112 |                                      |
|              |                       | 150   | 2.762 | 2.760 | 2.274 | 0.032 | 0.339 | 0.116 |                                      |
|              |                       | 160   | 2.747 | 2.778 | 2.274 | 0.034 | 0.352 | 0.119 |                                      |
|              |                       | 170   | 2.747 | 2.794 | 2.274 | 0.036 | 0.364 | 0.121 |                                      |
|              |                       | 180   | 2.811 | 2.810 | 2.274 | 0.038 | 0.375 | 0.124 |                                      |
|              |                       | 190   | 2.818 | 2.824 | 2.274 | 0.040 | 0.385 | 0.126 |                                      |
|              |                       | 200   | 2.817 | 2.838 | 2.274 | 0.041 | 0.394 | 0.128 |                                      |
|              |                       | 210   | 2.858 | 2.850 | 2.274 | 0.043 | 0.403 | 0.130 |                                      |
|              |                       | 220   | 2.849 | 2.862 | 2.274 | 0.045 | 0.412 | 0.131 |                                      |
|              |                       | 230   | 2.861 | 2.873 | 2.274 | 0.047 | 0.420 | 0.132 |                                      |
|              |                       | 240   | 2.876 | 2.884 | 2.274 | 0.049 | 0.427 | 0.134 |                                      |
|              |                       | 250   | 2.830 | 2.893 | 2.274 | 0.051 | 0.434 | 0.135 |                                      |
|              |                       | 260   | 2.906 | 2.903 | 2.274 | 0.053 | 0.440 | 0.136 |                                      |
|              |                       | 270   | 2.883 | 2.911 | 2.274 | 0.054 | 0.446 | 0.137 |                                      |
|              |                       | 280   | 2.884 | 2.920 | 2.274 | 0.056 | 0.452 | 0.138 |                                      |
|              |                       | 290   | 2.895 | 2.927 | 2.274 | 0.058 | 0.457 | 0.138 |                                      |
|              |                       | 300   | 2.916 | 2.935 | 2.274 | 0.060 | 0.462 | 0.139 |                                      |
|              |                       | 310   | 2.909 | 2.941 | 2.274 | 0.061 | 0.467 | 0.140 |                                      |
|              |                       | 320   | 2.922 | 2.948 | 2.274 | 0.063 | 0.471 | 0.140 |                                      |
| 330          | 2.952                 | 2.954 | 2.274 | 0.065 | 0.475 | 0.141 |       |       |                                      |
| 340          | 2.912                 | 2.960 | 2.274 | 0.066 | 0.479 | 0.141 |       |       |                                      |
| 350          | 2.937                 | 2.966 | 2.274 | 0.068 | 0.482 | 0.142 |       |       |                                      |
| 360          | 2.947                 | 2.971 | 2.274 | 0.070 | 0.485 | 0.142 |       |       |                                      |
| 370          | 2.957                 | 2.976 | 2.274 | 0.071 | 0.488 | 0.142 |       |       |                                      |
| 380          | 2.961                 | 2.981 | 2.274 | 0.073 | 0.491 | 0.143 |       |       |                                      |
|              | $c^{(AFP)} = 100$ nM  |       |       |       |       |       |       |       | $\bar{c}^{(AFP)} \approx 59.2333$ nM |
|              | $c^{(PTH)} = 2$ nM    |       |       |       |       |       |       |       | $\bar{c}^{(PTH)} \approx 8.0655$ nM  |

|              |                       |       |       |       |       |       |       |                                        |                                       |
|--------------|-----------------------|-------|-------|-------|-------|-------|-------|----------------------------------------|---------------------------------------|
|              |                       | 390   | 2.976 | 2.985 | 2.274 | 0.074 | 0.494 | 0.143                                  |                                       |
|              |                       | 400   | 2.959 | 2.989 | 2.274 | 0.076 | 0.496 | 0.143                                  |                                       |
|              |                       | 410   | 2.954 | 2.993 | 2.274 | 0.078 | 0.499 | 0.143                                  |                                       |
|              |                       | 420   | 2.985 | 2.997 | 2.274 | 0.079 | 0.501 | 0.143                                  |                                       |
|              |                       | 430   | 2.983 | 3.001 | 2.274 | 0.081 | 0.503 | 0.144                                  |                                       |
|              |                       | 440   | 2.966 | 3.005 | 2.274 | 0.082 | 0.505 | 0.144                                  |                                       |
|              |                       | 450   | 3.005 | 3.008 | 2.274 | 0.084 | 0.507 | 0.144                                  |                                       |
|              |                       | 460   | 2.993 | 3.011 | 2.274 | 0.085 | 0.508 | 0.144                                  |                                       |
|              |                       | 470   | 2.994 | 3.014 | 2.274 | 0.087 | 0.510 | 0.144                                  |                                       |
|              |                       | 480   | 2.970 | 3.017 | 2.274 | 0.088 | 0.511 | 0.144                                  |                                       |
|              |                       | 490   | 3.001 | 3.020 | 2.274 | 0.090 | 0.513 | 0.144                                  |                                       |
|              |                       | 500   | 3.004 | 3.023 | 2.274 | 0.091 | 0.514 | 0.144                                  |                                       |
|              |                       | 510   | 3.016 | 3.026 | 2.274 | 0.092 | 0.515 | 0.144                                  |                                       |
|              |                       | 520   | 3.016 | 3.028 | 2.274 | 0.094 | 0.516 | 0.145                                  |                                       |
|              |                       | 530   | 3.010 | 3.031 | 2.274 | 0.095 | 0.517 | 0.145                                  |                                       |
|              |                       | 540   | 3.018 | 3.033 | 2.274 | 0.097 | 0.518 | 0.145                                  |                                       |
|              |                       | 550   | 3.022 | 3.036 | 2.274 | 0.098 | 0.519 | 0.145                                  |                                       |
|              |                       | 560   | 3.064 | 3.038 | 2.274 | 0.099 | 0.520 | 0.145                                  |                                       |
|              |                       | 570   | 3.033 | 3.040 | 2.274 | 0.101 | 0.521 | 0.145                                  |                                       |
|              |                       | 580   | 3.058 | 3.042 | 2.274 | 0.102 | 0.521 | 0.145                                  |                                       |
|              |                       | 590   | 3.046 | 3.044 | 2.274 | 0.103 | 0.522 | 0.145                                  |                                       |
|              |                       | 600   | 3.033 | 3.046 | 2.274 | 0.105 | 0.523 | 0.145                                  |                                       |
| GFET<br>#M14 | $c^{(CEA)} = 2$<br>nM | -50   | 2.259 | 2.264 | -     | -     | -     | -                                      | $\tilde{c}^{(CEA)} \approx 1.3243$ nM |
|              |                       | -40   | 2.262 | 2.264 |       |       |       |                                        |                                       |
|              |                       | -30   | 2.262 | 2.264 |       |       |       |                                        |                                       |
|              |                       | -20   | 2.281 | 2.264 |       |       |       |                                        |                                       |
|              |                       | -10   | 2.261 | 2.264 |       |       |       |                                        |                                       |
|              | 0                     | 2.261 | 2.264 | 2.264 | 0.000 | 0.000 | 0.000 |                                        |                                       |
|              | 10                    | 2.374 | 2.318 | 2.264 | 0.002 | 0.040 | 0.012 |                                        |                                       |
|              | 20                    | 2.419 | 2.367 | 2.264 | 0.003 | 0.078 | 0.022 |                                        |                                       |
|              | 30                    | 2.455 | 2.413 | 2.264 | 0.005 | 0.113 | 0.031 |                                        |                                       |
|              | 40                    | 2.477 | 2.455 | 2.264 | 0.007 | 0.146 | 0.038 |                                        |                                       |
|              | 50                    | 2.557 | 2.494 | 2.264 | 0.008 | 0.177 | 0.045 |                                        |                                       |
|              | 60                    | 2.579 | 2.530 | 2.264 | 0.010 | 0.205 | 0.051 | $\tilde{c}^{(AFP)} \approx 59.1665$ nM |                                       |
|              | 70                    | 2.601 | 2.564 | 2.264 | 0.012 | 0.232 | 0.056 |                                        |                                       |
|              | 80                    | 2.633 | 2.595 | 2.264 | 0.013 | 0.257 | 0.061 | $\tilde{c}^{(PTH)} \approx 11.0778$ nM |                                       |
|              | 90                    | 2.687 | 2.624 | 2.264 | 0.015 | 0.281 | 0.064 |                                        |                                       |
|              | 100                   | 2.656 | 2.651 | 2.264 | 0.016 | 0.302 | 0.068 |                                        |                                       |
|              | 110                   | 2.687 | 2.676 | 2.264 | 0.018 | 0.323 | 0.071 |                                        |                                       |
|              | 120                   | 2.703 | 2.699 | 2.264 | 0.019 | 0.342 | 0.073 |                                        |                                       |
|              | 130                   | 2.718 | 2.721 | 2.264 | 0.021 | 0.360 | 0.076 |                                        |                                       |
|              | 140                   | 2.759 | 2.741 | 2.264 | 0.022 | 0.377 | 0.078 |                                        |                                       |
| 150          | 2.736                 | 2.760 | 2.264 | 0.024 | 0.392 | 0.079 |       |                                        |                                       |
| 160          | 2.761                 | 2.777 | 2.264 | 0.026 | 0.407 | 0.081 |       |                                        |                                       |
| 170          | 2.789                 | 2.794 | 2.264 | 0.027 | 0.420 | 0.082 |       |                                        |                                       |
| 180          | 2.792                 | 2.809 | 2.264 | 0.028 | 0.433 | 0.083 |       |                                        |                                       |



|              |                                                  |     |       |       |       |       |       |       |                                                                                   |
|--------------|--------------------------------------------------|-----|-------|-------|-------|-------|-------|-------|-----------------------------------------------------------------------------------|
|              |                                                  | 190 | 2.807 | 2.824 | 2.264 | 0.030 | 0.445 | 0.084 |                                                                                   |
|              |                                                  | 200 | 2.805 | 2.837 | 2.264 | 0.031 | 0.456 | 0.085 |                                                                                   |
|              |                                                  | 210 | 2.839 | 2.850 | 2.264 | 0.033 | 0.467 | 0.086 |                                                                                   |
|              |                                                  | 220 | 2.844 | 2.861 | 2.264 | 0.034 | 0.476 | 0.086 |                                                                                   |
|              |                                                  | 230 | 2.846 | 2.873 | 2.264 | 0.036 | 0.485 | 0.087 |                                                                                   |
|              |                                                  | 240 | 2.852 | 2.883 | 2.264 | 0.037 | 0.494 | 0.088 |                                                                                   |
|              |                                                  | 250 | 2.904 | 2.893 | 2.264 | 0.039 | 0.502 | 0.088 |                                                                                   |
|              |                                                  | 260 | 2.873 | 2.902 | 2.264 | 0.040 | 0.509 | 0.088 |                                                                                   |
|              |                                                  | 270 | 2.913 | 2.911 | 2.264 | 0.041 | 0.516 | 0.089 |                                                                                   |
|              |                                                  | 280 | 2.892 | 2.919 | 2.264 | 0.043 | 0.523 | 0.089 |                                                                                   |
|              |                                                  | 290 | 2.915 | 2.926 | 2.264 | 0.044 | 0.529 | 0.089 |                                                                                   |
|              |                                                  | 300 | 2.890 | 2.934 | 2.264 | 0.045 | 0.534 | 0.089 |                                                                                   |
|              |                                                  | 310 | 2.939 | 2.940 | 2.264 | 0.047 | 0.540 | 0.090 |                                                                                   |
|              |                                                  | 320 | 2.947 | 2.947 | 2.264 | 0.048 | 0.545 | 0.090 |                                                                                   |
|              |                                                  | 330 | 2.968 | 2.953 | 2.264 | 0.049 | 0.549 | 0.090 |                                                                                   |
|              |                                                  | 340 | 2.934 | 2.959 | 2.264 | 0.051 | 0.554 | 0.090 |                                                                                   |
|              |                                                  | 350 | 2.942 | 2.964 | 2.264 | 0.052 | 0.558 | 0.090 |                                                                                   |
|              |                                                  | 360 | 2.953 | 2.969 | 2.264 | 0.053 | 0.561 | 0.090 |                                                                                   |
|              |                                                  | 370 | 2.958 | 2.974 | 2.264 | 0.054 | 0.565 | 0.090 |                                                                                   |
|              |                                                  | 380 | 2.960 | 2.979 | 2.264 | 0.056 | 0.568 | 0.090 |                                                                                   |
|              |                                                  | 390 | 2.964 | 2.983 | 2.264 | 0.057 | 0.571 | 0.090 |                                                                                   |
|              |                                                  | 400 | 2.977 | 2.987 | 2.264 | 0.058 | 0.574 | 0.091 |                                                                                   |
|              |                                                  | 410 | 2.970 | 2.991 | 2.264 | 0.060 | 0.577 | 0.091 |                                                                                   |
|              |                                                  | 420 | 2.971 | 2.995 | 2.264 | 0.061 | 0.579 | 0.091 |                                                                                   |
|              |                                                  | 430 | 2.972 | 2.999 | 2.264 | 0.062 | 0.582 | 0.091 |                                                                                   |
|              |                                                  | 440 | 2.953 | 3.002 | 2.264 | 0.063 | 0.584 | 0.091 |                                                                                   |
|              |                                                  | 450 | 2.984 | 3.006 | 2.264 | 0.064 | 0.586 | 0.091 |                                                                                   |
|              |                                                  | 460 | 3.007 | 3.009 | 2.264 | 0.066 | 0.588 | 0.091 |                                                                                   |
|              |                                                  | 470 | 3.002 | 3.012 | 2.264 | 0.067 | 0.590 | 0.091 |                                                                                   |
|              |                                                  | 480 | 3.013 | 3.015 | 2.264 | 0.068 | 0.591 | 0.091 |                                                                                   |
|              |                                                  | 490 | 3.043 | 3.017 | 2.264 | 0.069 | 0.593 | 0.091 |                                                                                   |
|              |                                                  | 500 | 2.994 | 3.020 | 2.264 | 0.070 | 0.595 | 0.091 |                                                                                   |
|              |                                                  | 510 | 3.026 | 3.022 | 2.264 | 0.071 | 0.596 | 0.091 |                                                                                   |
|              |                                                  | 520 | 3.021 | 3.025 | 2.264 | 0.072 | 0.597 | 0.091 |                                                                                   |
|              |                                                  | 530 | 2.997 | 3.027 | 2.264 | 0.074 | 0.598 | 0.091 |                                                                                   |
|              |                                                  | 540 | 3.029 | 3.029 | 2.264 | 0.075 | 0.599 | 0.091 |                                                                                   |
|              |                                                  | 550 | 3.028 | 3.032 | 2.264 | 0.076 | 0.601 | 0.091 |                                                                                   |
|              |                                                  | 560 | 3.025 | 3.034 | 2.264 | 0.077 | 0.601 | 0.091 |                                                                                   |
|              |                                                  | 570 | 3.023 | 3.036 | 2.264 | 0.078 | 0.602 | 0.091 |                                                                                   |
|              |                                                  | 580 | 3.025 | 3.038 | 2.264 | 0.079 | 0.603 | 0.091 |                                                                                   |
|              |                                                  | 590 | 3.022 | 3.040 | 2.264 | 0.080 | 0.604 | 0.091 |                                                                                   |
|              |                                                  | 600 | 3.024 | 3.041 | 2.264 | 0.081 | 0.605 | 0.091 |                                                                                   |
| GFET<br>#M15 | $c^{(CEA)} = 2$<br>nM<br>$c^{(AFP)} =$<br>100 nM | -50 | 2.252 | 2.272 | -     | -     | -     | -     | $\bar{c}^{(CEA)} \approx$<br>1.5132 nM<br>$\bar{c}^{(AFP)} \approx$<br>58.1665 nM |
|              |                                                  | -40 | 2.268 | 2.272 |       |       |       |       |                                                                                   |
|              |                                                  | -30 | 2.288 | 2.272 |       |       |       |       |                                                                                   |
|              |                                                  | -20 | 2.269 | 2.272 |       |       |       |       |                                                                                   |

|                        |       |       |       |       |       |       |       |                                         |
|------------------------|-------|-------|-------|-------|-------|-------|-------|-----------------------------------------|
| $c^{(PTH)} = 20$<br>nM | -10   | 2.278 | 2.272 |       |       |       |       | $\bar{c}^{(PTH)} \approx$<br>45.0876 nM |
|                        | 0     | 2.278 | 2.272 | 2.272 | 0.000 | 0.000 | 0.000 |                                         |
|                        | 10    | 2.409 | 2.363 | 2.272 | 0.002 | 0.037 | 0.052 |                                         |
|                        | 20    | 2.423 | 2.431 | 2.272 | 0.004 | 0.071 | 0.085 |                                         |
|                        | 30    | 2.467 | 2.485 | 2.272 | 0.005 | 0.103 | 0.105 |                                         |
|                        | 40    | 2.558 | 2.529 | 2.272 | 0.007 | 0.133 | 0.117 |                                         |
|                        | 50    | 2.576 | 2.567 | 2.272 | 0.009 | 0.161 | 0.124 |                                         |
|                        | 60    | 2.602 | 2.599 | 2.272 | 0.011 | 0.188 | 0.129 |                                         |
|                        | 70    | 2.628 | 2.629 | 2.272 | 0.012 | 0.212 | 0.132 |                                         |
|                        | 80    | 2.655 | 2.655 | 2.272 | 0.014 | 0.235 | 0.134 |                                         |
|                        | 90    | 2.662 | 2.679 | 2.272 | 0.016 | 0.257 | 0.135 |                                         |
|                        | 100   | 2.693 | 2.702 | 2.272 | 0.017 | 0.277 | 0.136 |                                         |
|                        | 110   | 2.753 | 2.723 | 2.272 | 0.019 | 0.296 | 0.136 |                                         |
|                        | 120   | 2.753 | 2.742 | 2.272 | 0.021 | 0.314 | 0.136 |                                         |
|                        | 130   | 2.755 | 2.761 | 2.272 | 0.022 | 0.330 | 0.136 |                                         |
|                        | 140   | 2.775 | 2.778 | 2.272 | 0.024 | 0.345 | 0.136 |                                         |
|                        | 150   | 2.788 | 2.794 | 2.272 | 0.025 | 0.360 | 0.137 |                                         |
|                        | 160   | 2.806 | 2.809 | 2.272 | 0.027 | 0.373 | 0.137 |                                         |
|                        | 170   | 2.808 | 2.823 | 2.272 | 0.029 | 0.386 | 0.137 |                                         |
|                        | 180   | 2.819 | 2.837 | 2.272 | 0.030 | 0.398 | 0.137 |                                         |
|                        | 190   | 2.819 | 2.849 | 2.272 | 0.032 | 0.409 | 0.137 |                                         |
|                        | 200   | 2.849 | 2.861 | 2.272 | 0.033 | 0.419 | 0.137 |                                         |
|                        | 210   | 2.843 | 2.872 | 2.272 | 0.035 | 0.429 | 0.137 |                                         |
|                        | 220   | 2.844 | 2.883 | 2.272 | 0.036 | 0.438 | 0.137 |                                         |
|                        | 230   | 2.891 | 2.893 | 2.272 | 0.038 | 0.447 | 0.137 |                                         |
|                        | 240   | 2.910 | 2.902 | 2.272 | 0.039 | 0.455 | 0.137 |                                         |
|                        | 250   | 2.896 | 2.911 | 2.272 | 0.041 | 0.462 | 0.137 |                                         |
|                        | 260   | 2.891 | 2.920 | 2.272 | 0.042 | 0.469 | 0.137 |                                         |
|                        | 270   | 2.906 | 2.928 | 2.272 | 0.044 | 0.475 | 0.137 |                                         |
|                        | 280   | 2.903 | 2.935 | 2.272 | 0.045 | 0.481 | 0.137 |                                         |
|                        | 290   | 2.928 | 2.942 | 2.272 | 0.047 | 0.487 | 0.137 |                                         |
|                        | 300   | 2.942 | 2.949 | 2.272 | 0.048 | 0.492 | 0.137 |                                         |
|                        | 310   | 2.935 | 2.955 | 2.272 | 0.049 | 0.497 | 0.137 |                                         |
|                        | 320   | 2.972 | 2.961 | 2.272 | 0.051 | 0.502 | 0.137 |                                         |
|                        | 330   | 2.970 | 2.967 | 2.272 | 0.052 | 0.506 | 0.137 |                                         |
|                        | 340   | 2.977 | 2.973 | 2.272 | 0.053 | 0.511 | 0.137 |                                         |
|                        | 350   | 2.968 | 2.978 | 2.272 | 0.055 | 0.514 | 0.137 |                                         |
|                        | 360   | 2.950 | 2.983 | 2.272 | 0.056 | 0.518 | 0.137 |                                         |
|                        | 370   | 2.970 | 2.987 | 2.272 | 0.058 | 0.521 | 0.137 |                                         |
|                        | 380   | 2.996 | 2.992 | 2.272 | 0.059 | 0.524 | 0.137 |                                         |
|                        | 390   | 3.000 | 2.996 | 2.272 | 0.060 | 0.527 | 0.137 |                                         |
|                        | 400   | 2.996 | 3.000 | 2.272 | 0.061 | 0.530 | 0.137 |                                         |
|                        | 410   | 2.973 | 3.004 | 2.272 | 0.063 | 0.533 | 0.137 |                                         |
|                        | 420   | 3.006 | 3.007 | 2.272 | 0.064 | 0.535 | 0.137 |                                         |
| 430                    | 3.003 | 3.011 | 2.272 | 0.065 | 0.537 | 0.137 |       |                                         |
| 440                    | 3.000 | 3.014 | 2.272 | 0.066 | 0.539 | 0.137 |       |                                         |

|              |                                                                            |       |       |       |       |       |       |       |                                                                                                                      |
|--------------|----------------------------------------------------------------------------|-------|-------|-------|-------|-------|-------|-------|----------------------------------------------------------------------------------------------------------------------|
|              |                                                                            | 450   | 3.000 | 3.018 | 2.272 | 0.068 | 0.541 | 0.137 |                                                                                                                      |
|              |                                                                            | 460   | 2.997 | 3.021 | 2.272 | 0.069 | 0.543 | 0.137 |                                                                                                                      |
|              |                                                                            | 470   | 2.996 | 3.024 | 2.272 | 0.070 | 0.545 | 0.137 |                                                                                                                      |
|              |                                                                            | 480   | 2.997 | 3.026 | 2.272 | 0.071 | 0.546 | 0.137 |                                                                                                                      |
|              |                                                                            | 490   | 3.044 | 3.029 | 2.272 | 0.073 | 0.548 | 0.137 |                                                                                                                      |
|              |                                                                            | 500   | 3.016 | 3.032 | 2.272 | 0.074 | 0.549 | 0.137 |                                                                                                                      |
|              |                                                                            | 510   | 3.035 | 3.034 | 2.272 | 0.075 | 0.551 | 0.137 |                                                                                                                      |
|              |                                                                            | 520   | 3.031 | 3.037 | 2.272 | 0.076 | 0.552 | 0.137 |                                                                                                                      |
|              |                                                                            | 530   | 3.048 | 3.039 | 2.272 | 0.077 | 0.553 | 0.137 |                                                                                                                      |
|              |                                                                            | 540   | 3.046 | 3.041 | 2.272 | 0.078 | 0.554 | 0.137 |                                                                                                                      |
|              |                                                                            | 550   | 3.031 | 3.043 | 2.272 | 0.080 | 0.555 | 0.137 |                                                                                                                      |
|              |                                                                            | 560   | 3.003 | 3.045 | 2.272 | 0.081 | 0.556 | 0.137 |                                                                                                                      |
|              |                                                                            | 570   | 3.065 | 3.047 | 2.272 | 0.082 | 0.557 | 0.137 |                                                                                                                      |
|              |                                                                            | 580   | 3.077 | 3.049 | 2.272 | 0.083 | 0.558 | 0.137 |                                                                                                                      |
|              |                                                                            | 590   | 3.053 | 3.051 | 2.272 | 0.084 | 0.559 | 0.137 |                                                                                                                      |
|              |                                                                            | 600   | 3.041 | 3.053 | 2.272 | 0.085 | 0.559 | 0.137 |                                                                                                                      |
| GFET<br>#M16 | $c^{(CEA)} = 2$<br>nM<br>$c^{(AFP)} = 100$<br>nM<br>$c^{(PTH)} = 50$<br>nM | -50   | 2.294 | 2.285 | -     | -     | -     | -     | $\bar{c}^{(CEA)} \approx 1.1241$ nM<br>$\bar{c}^{(AFP)} \approx 68.2341$ nM<br>$\bar{c}^{(PTH)} \approx 106.3341$ nM |
|              |                                                                            | -40   | 2.284 | 2.285 |       |       |       |       |                                                                                                                      |
|              |                                                                            | -30   | 2.273 | 2.285 |       |       |       |       |                                                                                                                      |
|              |                                                                            | -20   | 2.289 | 2.285 |       |       |       |       |                                                                                                                      |
|              |                                                                            | -10   | 2.285 | 2.285 |       |       |       |       |                                                                                                                      |
|              |                                                                            | 0     | 2.285 | 2.285 | 2.285 | 0.000 | 0.000 | 0.000 |                                                                                                                      |
|              |                                                                            | 10    | 2.379 | 2.400 | 2.285 | 0.001 | 0.043 | 0.070 |                                                                                                                      |
|              |                                                                            | 20    | 2.488 | 2.464 | 2.285 | 0.003 | 0.083 | 0.094 |                                                                                                                      |
|              |                                                                            | 30    | 2.505 | 2.511 | 2.285 | 0.004 | 0.120 | 0.101 |                                                                                                                      |
|              |                                                                            | 40    | 2.547 | 2.549 | 2.285 | 0.005 | 0.155 | 0.104 |                                                                                                                      |
|              |                                                                            | 50    | 2.608 | 2.583 | 2.285 | 0.007 | 0.187 | 0.105 |                                                                                                                      |
|              |                                                                            | 60    | 2.600 | 2.614 | 2.285 | 0.008 | 0.216 | 0.105 |                                                                                                                      |
|              |                                                                            | 70    | 2.667 | 2.643 | 2.285 | 0.009 | 0.244 | 0.105 |                                                                                                                      |
|              |                                                                            | 80    | 2.672 | 2.669 | 2.285 | 0.011 | 0.269 | 0.105 |                                                                                                                      |
|              |                                                                            | 90    | 2.680 | 2.694 | 2.285 | 0.012 | 0.292 | 0.105 |                                                                                                                      |
|              |                                                                            | 100   | 2.712 | 2.717 | 2.285 | 0.013 | 0.314 | 0.105 |                                                                                                                      |
|              |                                                                            | 110   | 2.724 | 2.738 | 2.285 | 0.014 | 0.334 | 0.105 |                                                                                                                      |
|              |                                                                            | 120   | 2.777 | 2.758 | 2.285 | 0.016 | 0.353 | 0.105 |                                                                                                                      |
|              |                                                                            | 130   | 2.762 | 2.777 | 2.285 | 0.017 | 0.370 | 0.105 |                                                                                                                      |
|              |                                                                            | 140   | 2.789 | 2.794 | 2.285 | 0.018 | 0.386 | 0.105 |                                                                                                                      |
|              |                                                                            | 150   | 2.786 | 2.810 | 2.285 | 0.019 | 0.401 | 0.105 |                                                                                                                      |
|              |                                                                            | 160   | 2.809 | 2.825 | 2.285 | 0.021 | 0.415 | 0.105 |                                                                                                                      |
|              |                                                                            | 170   | 2.839 | 2.839 | 2.285 | 0.022 | 0.427 | 0.105 |                                                                                                                      |
|              |                                                                            | 180   | 2.822 | 2.852 | 2.285 | 0.023 | 0.439 | 0.105 |                                                                                                                      |
| 190          | 2.862                                                                      | 2.864 | 2.285 | 0.024 | 0.450 | 0.105 |       |       |                                                                                                                      |
| 200          | 2.838                                                                      | 2.875 | 2.285 | 0.025 | 0.460 | 0.105 |       |       |                                                                                                                      |
| 210          | 2.866                                                                      | 2.886 | 2.285 | 0.027 | 0.469 | 0.105 |       |       |                                                                                                                      |
| 220          | 2.883                                                                      | 2.896 | 2.285 | 0.028 | 0.478 | 0.105 |       |       |                                                                                                                      |
| 230          | 2.858                                                                      | 2.905 | 2.285 | 0.029 | 0.486 | 0.105 |       |       |                                                                                                                      |
| 240          | 2.917                                                                      | 2.913 | 2.285 | 0.030 | 0.493 | 0.105 |       |       |                                                                                                                      |

|              |                       |                       |       |       |       |       |       |       |                                          |       |                                          |
|--------------|-----------------------|-----------------------|-------|-------|-------|-------|-------|-------|------------------------------------------|-------|------------------------------------------|
|              |                       | 250                   | 2.904 | 2.921 | 2.285 | 0.031 | 0.500 | 0.105 |                                          |       |                                          |
|              |                       | 260                   | 2.930 | 2.929 | 2.285 | 0.032 | 0.507 | 0.105 |                                          |       |                                          |
|              |                       | 270                   | 2.922 | 2.936 | 2.285 | 0.034 | 0.513 | 0.105 |                                          |       |                                          |
|              |                       | 280                   | 2.944 | 2.943 | 2.285 | 0.035 | 0.518 | 0.105 |                                          |       |                                          |
|              |                       | 290                   | 2.912 | 2.949 | 2.285 | 0.036 | 0.523 | 0.105 |                                          |       |                                          |
|              |                       | 300                   | 2.927 | 2.955 | 2.285 | 0.037 | 0.528 | 0.105 |                                          |       |                                          |
|              |                       | 310                   | 2.947 | 2.960 | 2.285 | 0.038 | 0.532 | 0.105 |                                          |       |                                          |
|              |                       | 320                   | 2.955 | 2.965 | 2.285 | 0.039 | 0.536 | 0.105 |                                          |       |                                          |
|              |                       | 330                   | 2.962 | 2.970 | 2.285 | 0.040 | 0.540 | 0.105 |                                          |       |                                          |
|              |                       | 340                   | 2.966 | 2.974 | 2.285 | 0.041 | 0.543 | 0.105 |                                          |       |                                          |
|              |                       | 350                   | 2.972 | 2.979 | 2.285 | 0.042 | 0.547 | 0.105 |                                          |       |                                          |
|              |                       | 360                   | 2.984 | 2.983 | 2.285 | 0.043 | 0.550 | 0.105 |                                          |       |                                          |
|              |                       | 370                   | 2.975 | 2.987 | 2.285 | 0.044 | 0.552 | 0.105 |                                          |       |                                          |
|              |                       | 380                   | 3.005 | 2.990 | 2.285 | 0.045 | 0.555 | 0.105 |                                          |       |                                          |
|              |                       | 390                   | 2.991 | 2.994 | 2.285 | 0.046 | 0.557 | 0.105 |                                          |       |                                          |
|              |                       | 400                   | 2.991 | 2.997 | 2.285 | 0.047 | 0.559 | 0.105 |                                          |       |                                          |
|              |                       | 410                   | 2.969 | 3.000 | 2.285 | 0.049 | 0.561 | 0.105 |                                          |       |                                          |
|              |                       | 420                   | 3.000 | 3.003 | 2.285 | 0.050 | 0.563 | 0.105 |                                          |       |                                          |
|              |                       | 430                   | 3.009 | 3.005 | 2.285 | 0.051 | 0.565 | 0.105 |                                          |       |                                          |
|              |                       | 440                   | 3.011 | 3.008 | 2.285 | 0.052 | 0.567 | 0.105 |                                          |       |                                          |
|              |                       | 450                   | 3.008 | 3.010 | 2.285 | 0.053 | 0.568 | 0.105 |                                          |       |                                          |
|              |                       | 460                   | 2.995 | 3.013 | 2.285 | 0.054 | 0.569 | 0.105 |                                          |       |                                          |
|              |                       | 470                   | 2.992 | 3.015 | 2.285 | 0.055 | 0.571 | 0.105 |                                          |       |                                          |
|              |                       | 480                   | 3.009 | 3.017 | 2.285 | 0.055 | 0.572 | 0.105 |                                          |       |                                          |
|              |                       | 490                   | 3.035 | 3.019 | 2.285 | 0.056 | 0.573 | 0.105 |                                          |       |                                          |
|              |                       | 500                   | 3.021 | 3.021 | 2.285 | 0.057 | 0.574 | 0.105 |                                          |       |                                          |
|              |                       | 510                   | 3.033 | 3.023 | 2.285 | 0.058 | 0.575 | 0.105 |                                          |       |                                          |
|              |                       | 520                   | 3.030 | 3.025 | 2.285 | 0.059 | 0.576 | 0.105 |                                          |       |                                          |
|              |                       | 530                   | 3.057 | 3.027 | 2.285 | 0.060 | 0.577 | 0.105 |                                          |       |                                          |
|              |                       | 540                   | 3.038 | 3.028 | 2.285 | 0.061 | 0.577 | 0.105 |                                          |       |                                          |
|              |                       | 550                   | 3.025 | 3.030 | 2.285 | 0.062 | 0.578 | 0.105 |                                          |       |                                          |
|              |                       | 560                   | 3.051 | 3.032 | 2.285 | 0.063 | 0.579 | 0.105 |                                          |       |                                          |
|              |                       | 570                   | 3.044 | 3.033 | 2.285 | 0.064 | 0.579 | 0.105 |                                          |       |                                          |
|              |                       | 580                   | 3.064 | 3.035 | 2.285 | 0.065 | 0.580 | 0.105 |                                          |       |                                          |
|              |                       | 590                   | 3.070 | 3.036 | 2.285 | 0.066 | 0.580 | 0.105 |                                          |       |                                          |
|              |                       | 600                   | 3.095 | 3.037 | 2.285 | 0.067 | 0.581 | 0.105 |                                          |       |                                          |
| GFET<br>#M17 | $c^{(CEA)} = 5$<br>nM | -50                   | 2.270 | 2.265 | -     | -     | -     | -     | $\tilde{c}^{(CEA)} \approx$<br>5.4244 nM |       |                                          |
|              |                       | -40                   | 2.276 | 2.265 |       |       |       |       |                                          |       |                                          |
|              |                       | -30                   | 2.274 | 2.265 |       |       |       |       |                                          |       |                                          |
|              |                       | -20                   | 2.285 | 2.265 |       |       |       |       |                                          |       |                                          |
|              |                       | -10                   | 2.242 | 2.265 |       |       |       |       |                                          |       |                                          |
|              | $c^{(AFP)} = 5$<br>nM | 0                     | 2.242 | 2.265 | 2.265 | 0.000 | 0.000 | 0.000 | $\tilde{c}^{(AFP)} \approx$<br>3.5087 nM |       |                                          |
|              |                       | $c^{(PTH)} = 2$<br>nM | 10    | 2.305 | 2.296 | 2.265 | 0.007 | 0.003 |                                          | 0.021 | $\tilde{c}^{(PTH)} \approx$<br>8.3268 nM |
|              |                       |                       | 20    | 2.349 | 2.324 | 2.265 | 0.014 | 0.005 |                                          | 0.040 |                                          |
|              |                       |                       | 30    | 2.376 | 2.351 | 2.265 | 0.021 | 0.008 |                                          | 0.057 |                                          |
| 40           | 2.410                 | 2.375                 | 2.265 | 0.028 | 0.010 | 0.072 |       |       |                                          |       |                                          |

|     |       |       |       |       |       |       |
|-----|-------|-------|-------|-------|-------|-------|
| 50  | 2.439 | 2.398 | 2.265 | 0.035 | 0.013 | 0.086 |
| 60  | 2.452 | 2.419 | 2.265 | 0.041 | 0.015 | 0.098 |
| 70  | 2.441 | 2.439 | 2.265 | 0.048 | 0.017 | 0.109 |
| 80  | 2.480 | 2.457 | 2.265 | 0.054 | 0.020 | 0.119 |
| 90  | 2.498 | 2.474 | 2.265 | 0.060 | 0.022 | 0.128 |
| 100 | 2.514 | 2.491 | 2.265 | 0.066 | 0.024 | 0.136 |
| 110 | 2.523 | 2.506 | 2.265 | 0.072 | 0.027 | 0.143 |
| 120 | 2.546 | 2.520 | 2.265 | 0.077 | 0.029 | 0.149 |
| 130 | 2.537 | 2.534 | 2.265 | 0.083 | 0.031 | 0.155 |
| 140 | 2.552 | 2.546 | 2.265 | 0.088 | 0.033 | 0.160 |
| 150 | 2.583 | 2.558 | 2.265 | 0.094 | 0.035 | 0.164 |
| 160 | 2.550 | 2.570 | 2.265 | 0.099 | 0.037 | 0.169 |
| 170 | 2.576 | 2.581 | 2.265 | 0.104 | 0.040 | 0.172 |
| 180 | 2.584 | 2.591 | 2.265 | 0.109 | 0.042 | 0.176 |
| 190 | 2.601 | 2.601 | 2.265 | 0.114 | 0.044 | 0.178 |
| 200 | 2.595 | 2.610 | 2.265 | 0.119 | 0.046 | 0.181 |
| 210 | 2.625 | 2.619 | 2.265 | 0.123 | 0.048 | 0.184 |
| 220 | 2.617 | 2.628 | 2.265 | 0.128 | 0.050 | 0.186 |
| 230 | 2.619 | 2.636 | 2.265 | 0.132 | 0.052 | 0.188 |
| 240 | 2.641 | 2.644 | 2.265 | 0.137 | 0.054 | 0.189 |
| 250 | 2.674 | 2.652 | 2.265 | 0.141 | 0.056 | 0.191 |
| 260 | 2.664 | 2.660 | 2.265 | 0.145 | 0.057 | 0.192 |
| 270 | 2.634 | 2.667 | 2.265 | 0.149 | 0.059 | 0.194 |
| 280 | 2.662 | 2.674 | 2.265 | 0.153 | 0.061 | 0.195 |
| 290 | 2.649 | 2.680 | 2.265 | 0.157 | 0.063 | 0.196 |
| 300 | 2.696 | 2.687 | 2.265 | 0.161 | 0.065 | 0.197 |
| 310 | 2.697 | 2.693 | 2.265 | 0.165 | 0.067 | 0.197 |
| 320 | 2.669 | 2.699 | 2.265 | 0.168 | 0.068 | 0.198 |
| 330 | 2.697 | 2.705 | 2.265 | 0.172 | 0.070 | 0.199 |
| 340 | 2.703 | 2.711 | 2.265 | 0.175 | 0.072 | 0.199 |
| 350 | 2.734 | 2.717 | 2.265 | 0.179 | 0.073 | 0.200 |
| 360 | 2.726 | 2.722 | 2.265 | 0.182 | 0.075 | 0.200 |
| 370 | 2.711 | 2.727 | 2.265 | 0.185 | 0.077 | 0.201 |
| 380 | 2.736 | 2.733 | 2.265 | 0.188 | 0.078 | 0.201 |
| 390 | 2.726 | 2.738 | 2.265 | 0.191 | 0.080 | 0.201 |
| 400 | 2.757 | 2.743 | 2.265 | 0.194 | 0.082 | 0.202 |
| 410 | 2.760 | 2.747 | 2.265 | 0.197 | 0.083 | 0.202 |
| 420 | 2.759 | 2.752 | 2.265 | 0.200 | 0.085 | 0.202 |
| 430 | 2.786 | 2.757 | 2.265 | 0.203 | 0.086 | 0.202 |
| 440 | 2.747 | 2.761 | 2.265 | 0.206 | 0.088 | 0.203 |
| 450 | 2.775 | 2.766 | 2.265 | 0.209 | 0.089 | 0.203 |
| 460 | 2.772 | 2.770 | 2.265 | 0.211 | 0.091 | 0.203 |
| 470 | 2.789 | 2.774 | 2.265 | 0.214 | 0.092 | 0.203 |
| 480 | 2.770 | 2.778 | 2.265 | 0.216 | 0.094 | 0.203 |
| 490 | 2.793 | 2.782 | 2.265 | 0.219 | 0.095 | 0.203 |
| 500 | 2.822 | 2.786 | 2.265 | 0.221 | 0.096 | 0.203 |

|              |                       |       |       |       |       |       |       |                                        |                                       |
|--------------|-----------------------|-------|-------|-------|-------|-------|-------|----------------------------------------|---------------------------------------|
|              |                       | 510   | 2.781 | 2.790 | 2.265 | 0.224 | 0.098 | 0.204                                  |                                       |
|              |                       | 520   | 2.838 | 2.794 | 2.265 | 0.226 | 0.099 | 0.204                                  |                                       |
|              |                       | 530   | 2.815 | 2.797 | 2.265 | 0.228 | 0.101 | 0.204                                  |                                       |
|              |                       | 540   | 2.821 | 2.801 | 2.265 | 0.231 | 0.102 | 0.204                                  |                                       |
|              |                       | 550   | 2.820 | 2.805 | 2.265 | 0.233 | 0.103 | 0.204                                  |                                       |
|              |                       | 560   | 2.819 | 2.808 | 2.265 | 0.235 | 0.105 | 0.204                                  |                                       |
|              |                       | 570   | 2.847 | 2.811 | 2.265 | 0.237 | 0.106 | 0.204                                  |                                       |
|              |                       | 580   | 2.822 | 2.815 | 2.265 | 0.239 | 0.107 | 0.204                                  |                                       |
|              |                       | 590   | 2.837 | 2.818 | 2.265 | 0.241 | 0.108 | 0.204                                  |                                       |
|              |                       | 600   | 2.823 | 2.821 | 2.265 | 0.243 | 0.110 | 0.204                                  |                                       |
| GFET<br>#M18 | $c^{(CEA)} = 5$<br>nM | -50   | 2.278 | 2.273 | -     | -     | -     | -                                      | $\tilde{c}^{(CEA)} \approx 5.4224$ nM |
|              |                       | -40   | 2.269 | 2.273 |       |       |       |                                        |                                       |
|              |                       | -30   | 2.252 | 2.273 |       |       |       |                                        |                                       |
|              |                       | -20   | 2.275 | 2.273 |       |       |       |                                        |                                       |
|              |                       | -10   | 2.281 | 2.273 |       |       |       |                                        |                                       |
|              |                       | 0     | 2.281 | 2.273 | 2.273 | 0.000 | 0.000 | 0.000                                  |                                       |
|              |                       | 10    | 2.338 | 2.308 | 2.273 | 0.009 | 0.003 | 0.024                                  |                                       |
|              |                       | 20    | 2.356 | 2.341 | 2.273 | 0.018 | 0.005 | 0.045                                  |                                       |
|              |                       | 30    | 2.397 | 2.370 | 2.273 | 0.027 | 0.008 | 0.062                                  |                                       |
|              |                       | 40    | 2.404 | 2.396 | 2.273 | 0.036 | 0.010 | 0.078                                  |                                       |
|              |                       | 50    | 2.436 | 2.420 | 2.273 | 0.044 | 0.013 | 0.091                                  |                                       |
|              |                       | 60    | 2.479 | 2.442 | 2.273 | 0.052 | 0.015 | 0.103                                  |                                       |
|              |                       | 70    | 2.479 | 2.463 | 2.273 | 0.060 | 0.017 | 0.112                                  |                                       |
|              |                       | 80    | 2.507 | 2.481 | 2.273 | 0.068 | 0.020 | 0.121                                  |                                       |
|              |                       | 90    | 2.518 | 2.499 | 2.273 | 0.076 | 0.022 | 0.128                                  |                                       |
|              |                       | 100   | 2.543 | 2.515 | 2.273 | 0.083 | 0.024 | 0.135                                  |                                       |
|              |                       | 110   | 2.549 | 2.530 | 2.273 | 0.091 | 0.027 | 0.140                                  |                                       |
|              |                       | 120   | 2.536 | 2.544 | 2.273 | 0.098 | 0.029 | 0.145                                  |                                       |
|              |                       | 130   | 2.572 | 2.557 | 2.273 | 0.105 | 0.031 | 0.149                                  |                                       |
|              |                       | 140   | 2.564 | 2.570 | 2.273 | 0.112 | 0.033 | 0.152                                  |                                       |
|              |                       | 150   | 2.594 | 2.582 | 2.273 | 0.118 | 0.036 | 0.155                                  |                                       |
|              |                       | 160   | 2.582 | 2.593 | 2.273 | 0.125 | 0.038 | 0.158                                  |                                       |
|              |                       | 170   | 2.612 | 2.604 | 2.273 | 0.131 | 0.040 | 0.160                                  |                                       |
|              |                       | 180   | 2.597 | 2.614 | 2.273 | 0.138 | 0.042 | 0.162                                  |                                       |
|              |                       | 190   | 2.634 | 2.624 | 2.273 | 0.144 | 0.044 | 0.164                                  |                                       |
|              |                       | 200   | 2.632 | 2.634 | 2.273 | 0.150 | 0.046 | 0.165                                  |                                       |
|              |                       | 210   | 2.640 | 2.643 | 2.273 | 0.156 | 0.048 | 0.166                                  |                                       |
|              |                       | 220   | 2.641 | 2.652 | 2.273 | 0.161 | 0.050 | 0.167                                  |                                       |
|              |                       | 230   | 2.664 | 2.660 | 2.273 | 0.167 | 0.052 | 0.168                                  |                                       |
|              |                       | 240   | 2.684 | 2.669 | 2.273 | 0.173 | 0.054 | 0.169                                  |                                       |
| 250          | 2.696                 | 2.677 | 2.273 | 0.178 | 0.056 | 0.170 |       |                                        |                                       |
| 260          | 2.685                 | 2.684 | 2.273 | 0.183 | 0.058 | 0.170 |       |                                        |                                       |
| 270          | 2.693                 | 2.692 | 2.273 | 0.188 | 0.060 | 0.171 |       |                                        |                                       |
| 280          | 2.703                 | 2.699 | 2.273 | 0.193 | 0.062 | 0.171 |       |                                        |                                       |
| 290          | 2.720                 | 2.706 | 2.273 | 0.198 | 0.064 | 0.172 |       |                                        |                                       |
| 300          | 2.679                 | 2.713 | 2.273 | 0.203 | 0.065 | 0.172 |       |                                        |                                       |
|              | $c^{(AFP)} = 5$<br>nM |       |       |       |       |       |       | $\tilde{c}^{(AFP)} \approx 3.2154$ nM  |                                       |
|              | $c^{(PTH)} = 5$<br>nM |       |       |       |       |       |       | $\tilde{c}^{(PTH)} \approx 12.1653$ nM |                                       |

|              |                        |       |       |       |       |       |       |       |                                           |
|--------------|------------------------|-------|-------|-------|-------|-------|-------|-------|-------------------------------------------|
|              |                        | 310   | 2.727 | 2.720 | 2.273 | 0.208 | 0.067 | 0.172 |                                           |
|              |                        | 320   | 2.716 | 2.727 | 2.273 | 0.212 | 0.069 | 0.173 |                                           |
|              |                        | 330   | 2.717 | 2.733 | 2.273 | 0.217 | 0.071 | 0.173 |                                           |
|              |                        | 340   | 2.749 | 2.739 | 2.273 | 0.221 | 0.073 | 0.173 |                                           |
|              |                        | 350   | 2.751 | 2.746 | 2.273 | 0.226 | 0.074 | 0.173 |                                           |
|              |                        | 360   | 2.737 | 2.752 | 2.273 | 0.230 | 0.076 | 0.173 |                                           |
|              |                        | 370   | 2.748 | 2.758 | 2.273 | 0.234 | 0.078 | 0.173 |                                           |
|              |                        | 380   | 2.775 | 2.763 | 2.273 | 0.238 | 0.079 | 0.174 |                                           |
|              |                        | 390   | 2.774 | 2.769 | 2.273 | 0.242 | 0.081 | 0.174 |                                           |
|              |                        | 400   | 2.742 | 2.774 | 2.273 | 0.246 | 0.083 | 0.174 |                                           |
|              |                        | 410   | 2.763 | 2.780 | 2.273 | 0.249 | 0.084 | 0.174 |                                           |
|              |                        | 420   | 2.795 | 2.785 | 2.273 | 0.253 | 0.086 | 0.174 |                                           |
|              |                        | 430   | 2.777 | 2.790 | 2.273 | 0.257 | 0.087 | 0.174 |                                           |
|              |                        | 440   | 2.777 | 2.795 | 2.273 | 0.260 | 0.089 | 0.174 |                                           |
|              |                        | 450   | 2.795 | 2.800 | 2.273 | 0.264 | 0.090 | 0.174 |                                           |
|              |                        | 460   | 2.817 | 2.805 | 2.273 | 0.267 | 0.092 | 0.174 |                                           |
|              |                        | 470   | 2.805 | 2.810 | 2.273 | 0.270 | 0.093 | 0.174 |                                           |
|              |                        | 480   | 2.811 | 2.815 | 2.273 | 0.273 | 0.095 | 0.174 |                                           |
|              |                        | 490   | 2.811 | 2.819 | 2.273 | 0.277 | 0.096 | 0.174 |                                           |
|              |                        | 500   | 2.844 | 2.824 | 2.273 | 0.280 | 0.098 | 0.174 |                                           |
|              |                        | 510   | 2.835 | 2.828 | 2.273 | 0.283 | 0.099 | 0.174 |                                           |
|              |                        | 520   | 2.823 | 2.833 | 2.273 | 0.286 | 0.101 | 0.174 |                                           |
|              |                        | 530   | 2.830 | 2.837 | 2.273 | 0.288 | 0.102 | 0.174 |                                           |
|              |                        | 540   | 2.856 | 2.841 | 2.273 | 0.291 | 0.103 | 0.174 |                                           |
|              |                        | 550   | 2.854 | 2.845 | 2.273 | 0.294 | 0.105 | 0.174 |                                           |
|              |                        | 560   | 2.843 | 2.849 | 2.273 | 0.297 | 0.106 | 0.174 |                                           |
|              |                        | 570   | 2.828 | 2.853 | 2.273 | 0.299 | 0.107 | 0.174 |                                           |
|              |                        | 580   | 2.867 | 2.857 | 2.273 | 0.302 | 0.109 | 0.174 |                                           |
|              |                        | 590   | 2.877 | 2.861 | 2.273 | 0.304 | 0.110 | 0.174 |                                           |
|              |                        | 600   | 2.871 | 2.865 | 2.273 | 0.307 | 0.111 | 0.174 |                                           |
| GFET<br>#M19 | $c^{(CEA)} = 5$<br>nM  | -50   | 2.262 | 2.258 | -     | -     | -     | -     | $\tilde{c}^{(CEA)} \approx$<br>5.4227 nM  |
|              |                        | -40   | 2.293 | 2.258 |       |       |       |       |                                           |
|              |                        | -30   | 2.257 | 2.258 |       |       |       |       |                                           |
|              |                        | -20   | 2.255 | 2.258 |       |       |       |       |                                           |
|              |                        | -10   | 2.242 | 2.258 |       |       |       |       |                                           |
|              | 0                      | 2.242 | 2.258 | 2.258 | 0.000 | 0.000 | 0.000 |       |                                           |
|              | $c^{(AFP)} = 5$<br>nM  | 10    | 2.337 | 2.340 | 2.258 | 0.009 | 0.004 | 0.068 | $\tilde{c}^{(AFP)} \approx$<br>5.6239 nM  |
|              |                        | 20    | 2.388 | 2.393 | 2.258 | 0.018 | 0.008 | 0.109 |                                           |
|              |                        | 30    | 2.431 | 2.430 | 2.258 | 0.026 | 0.012 | 0.132 |                                           |
|              | $c^{(PTH)} = 20$<br>nM | 40    | 2.438 | 2.456 | 2.258 | 0.035 | 0.016 | 0.146 | $\tilde{c}^{(PTH)} \approx$<br>49.4249 nM |
|              |                        | 50    | 2.482 | 2.477 | 2.258 | 0.043 | 0.020 | 0.155 |                                           |
|              |                        | 60    | 2.493 | 2.493 | 2.258 | 0.051 | 0.024 | 0.160 |                                           |
|              |                        | 70    | 2.526 | 2.508 | 2.258 | 0.059 | 0.028 | 0.163 |                                           |
|              |                        | 80    | 2.528 | 2.521 | 2.258 | 0.067 | 0.032 | 0.164 |                                           |
| 90           |                        | 2.564 | 2.533 | 2.258 | 0.074 | 0.036 | 0.165 |       |                                           |
| 100          |                        | 2.544 | 2.545 | 2.258 | 0.082 | 0.039 | 0.166 |       |                                           |

|     |       |       |       |       |       |       |
|-----|-------|-------|-------|-------|-------|-------|
| 110 | 2.568 | 2.556 | 2.258 | 0.089 | 0.043 | 0.166 |
| 120 | 2.588 | 2.567 | 2.258 | 0.096 | 0.046 | 0.166 |
| 130 | 2.594 | 2.578 | 2.258 | 0.103 | 0.050 | 0.166 |
| 140 | 2.617 | 2.588 | 2.258 | 0.110 | 0.053 | 0.167 |
| 150 | 2.628 | 2.598 | 2.258 | 0.116 | 0.057 | 0.167 |
| 160 | 2.618 | 2.608 | 2.258 | 0.123 | 0.060 | 0.167 |
| 170 | 2.629 | 2.617 | 2.258 | 0.129 | 0.063 | 0.167 |
| 180 | 2.624 | 2.627 | 2.258 | 0.135 | 0.067 | 0.167 |
| 190 | 2.694 | 2.636 | 2.258 | 0.141 | 0.070 | 0.167 |
| 200 | 2.663 | 2.645 | 2.258 | 0.147 | 0.073 | 0.167 |
| 210 | 2.657 | 2.654 | 2.258 | 0.153 | 0.076 | 0.167 |
| 220 | 2.683 | 2.663 | 2.258 | 0.158 | 0.079 | 0.167 |
| 230 | 2.662 | 2.671 | 2.258 | 0.164 | 0.082 | 0.167 |
| 240 | 2.674 | 2.680 | 2.258 | 0.169 | 0.085 | 0.167 |
| 250 | 2.721 | 2.688 | 2.258 | 0.175 | 0.088 | 0.167 |
| 260 | 2.718 | 2.696 | 2.258 | 0.180 | 0.091 | 0.167 |
| 270 | 2.686 | 2.704 | 2.258 | 0.185 | 0.094 | 0.167 |
| 280 | 2.695 | 2.712 | 2.258 | 0.190 | 0.097 | 0.167 |
| 290 | 2.713 | 2.719 | 2.258 | 0.194 | 0.100 | 0.167 |
| 300 | 2.707 | 2.727 | 2.258 | 0.199 | 0.103 | 0.167 |
| 310 | 2.735 | 2.734 | 2.258 | 0.204 | 0.105 | 0.167 |
| 320 | 2.732 | 2.741 | 2.258 | 0.208 | 0.108 | 0.167 |
| 330 | 2.767 | 2.748 | 2.258 | 0.213 | 0.111 | 0.167 |
| 340 | 2.767 | 2.755 | 2.258 | 0.217 | 0.113 | 0.167 |
| 350 | 2.763 | 2.762 | 2.258 | 0.221 | 0.116 | 0.167 |
| 360 | 2.777 | 2.769 | 2.258 | 0.225 | 0.118 | 0.167 |
| 370 | 2.753 | 2.775 | 2.258 | 0.229 | 0.121 | 0.167 |
| 380 | 2.774 | 2.782 | 2.258 | 0.233 | 0.123 | 0.167 |
| 390 | 2.782 | 2.788 | 2.258 | 0.237 | 0.126 | 0.167 |
| 400 | 2.812 | 2.794 | 2.258 | 0.241 | 0.128 | 0.167 |
| 410 | 2.782 | 2.800 | 2.258 | 0.245 | 0.130 | 0.167 |
| 420 | 2.777 | 2.806 | 2.258 | 0.248 | 0.133 | 0.167 |
| 430 | 2.784 | 2.812 | 2.258 | 0.252 | 0.135 | 0.167 |
| 440 | 2.791 | 2.817 | 2.258 | 0.255 | 0.137 | 0.167 |
| 450 | 2.811 | 2.823 | 2.258 | 0.259 | 0.139 | 0.167 |
| 460 | 2.798 | 2.829 | 2.258 | 0.262 | 0.142 | 0.167 |
| 470 | 2.826 | 2.834 | 2.258 | 0.265 | 0.144 | 0.167 |
| 480 | 2.814 | 2.839 | 2.258 | 0.268 | 0.146 | 0.167 |
| 490 | 2.813 | 2.844 | 2.258 | 0.271 | 0.148 | 0.167 |
| 500 | 2.849 | 2.849 | 2.258 | 0.274 | 0.150 | 0.167 |
| 510 | 2.863 | 2.854 | 2.258 | 0.277 | 0.152 | 0.167 |
| 520 | 2.817 | 2.859 | 2.258 | 0.280 | 0.154 | 0.167 |
| 530 | 2.842 | 2.864 | 2.258 | 0.283 | 0.156 | 0.167 |
| 540 | 2.859 | 2.869 | 2.258 | 0.286 | 0.158 | 0.167 |
| 550 | 2.857 | 2.873 | 2.258 | 0.288 | 0.160 | 0.167 |
| 560 | 2.850 | 2.878 | 2.258 | 0.291 | 0.162 | 0.167 |



|              |                        |       |       |       |       |       |       |       |                                        |
|--------------|------------------------|-------|-------|-------|-------|-------|-------|-------|----------------------------------------|
|              |                        | 570   | 2.873 | 2.882 | 2.258 | 0.294 | 0.164 | 0.167 |                                        |
|              |                        | 580   | 2.870 | 2.887 | 2.258 | 0.296 | 0.166 | 0.167 |                                        |
|              |                        | 590   | 2.842 | 2.891 | 2.258 | 0.298 | 0.167 | 0.167 |                                        |
|              |                        | 600   | 2.866 | 2.895 | 2.258 | 0.301 | 0.169 | 0.167 |                                        |
| GFET<br>#M20 | $c^{(CEA)} = 5$<br>nM  | -50   | 2.259 | 2.269 | -     | -     | -     | -     | $\tilde{c}^{(CEA)} \approx 4.4198$ nM  |
|              |                        | -40   | 2.269 | 2.269 |       |       |       |       |                                        |
|              |                        | -30   | 2.277 | 2.269 |       |       |       |       |                                        |
|              |                        | -20   | 2.279 | 2.269 |       |       |       |       |                                        |
|              |                        | -10   | 2.265 | 2.269 |       |       |       |       |                                        |
|              |                        | 0     | 2.265 | 2.269 | 2.269 | 0.000 | 0.000 | 0.000 |                                        |
|              |                        | 10    | 2.371 | 2.394 | 2.269 | 0.007 | 0.004 | 0.114 |                                        |
|              |                        | 20    | 2.404 | 2.447 | 2.269 | 0.015 | 0.008 | 0.155 |                                        |
|              |                        | 30    | 2.449 | 2.473 | 2.269 | 0.022 | 0.011 | 0.171 |                                        |
|              |                        | 40    | 2.473 | 2.490 | 2.269 | 0.029 | 0.015 | 0.176 |                                        |
|              |                        | 50    | 2.516 | 2.502 | 2.269 | 0.036 | 0.019 | 0.178 |                                        |
|              |                        | 60    | 2.507 | 2.514 | 2.269 | 0.043 | 0.023 | 0.179 |                                        |
|              |                        | 70    | 2.543 | 2.524 | 2.269 | 0.050 | 0.026 | 0.180 |                                        |
|              |                        | 80    | 2.540 | 2.534 | 2.269 | 0.056 | 0.030 | 0.180 |                                        |
|              |                        | 90    | 2.572 | 2.544 | 2.269 | 0.063 | 0.033 | 0.180 |                                        |
|              |                        | 100   | 2.553 | 2.554 | 2.269 | 0.069 | 0.037 | 0.180 |                                        |
|              |                        | 110   | 2.558 | 2.564 | 2.269 | 0.075 | 0.040 | 0.180 |                                        |
|              |                        | 120   | 2.589 | 2.573 | 2.269 | 0.081 | 0.043 | 0.180 |                                        |
|              |                        | 130   | 2.589 | 2.582 | 2.269 | 0.087 | 0.047 | 0.180 |                                        |
|              |                        | 140   | 2.613 | 2.592 | 2.269 | 0.093 | 0.050 | 0.180 |                                        |
|              |                        | 150   | 2.603 | 2.601 | 2.269 | 0.099 | 0.053 | 0.180 |                                        |
|              |                        | 160   | 2.612 | 2.609 | 2.269 | 0.104 | 0.056 | 0.180 |                                        |
|              |                        | 170   | 2.645 | 2.618 | 2.269 | 0.110 | 0.059 | 0.180 |                                        |
|              |                        | 180   | 2.673 | 2.627 | 2.269 | 0.115 | 0.063 | 0.180 |                                        |
|              |                        | 190   | 2.644 | 2.635 | 2.269 | 0.121 | 0.066 | 0.180 |                                        |
|              |                        | 200   | 2.634 | 2.643 | 2.269 | 0.126 | 0.069 | 0.180 |                                        |
|              |                        | 210   | 2.672 | 2.651 | 2.269 | 0.131 | 0.072 | 0.180 |                                        |
|              |                        | 220   | 2.692 | 2.659 | 2.269 | 0.136 | 0.075 | 0.180 |                                        |
|              |                        | 230   | 2.658 | 2.667 | 2.269 | 0.141 | 0.077 | 0.180 |                                        |
|              |                        | 240   | 2.674 | 2.675 | 2.269 | 0.146 | 0.080 | 0.180 |                                        |
|              |                        | 250   | 2.662 | 2.683 | 2.269 | 0.151 | 0.083 | 0.180 |                                        |
|              |                        | 260   | 2.704 | 2.690 | 2.269 | 0.155 | 0.086 | 0.180 |                                        |
|              |                        | 270   | 2.698 | 2.697 | 2.269 | 0.160 | 0.089 | 0.180 |                                        |
|              |                        | 280   | 2.714 | 2.705 | 2.269 | 0.165 | 0.091 | 0.180 |                                        |
|              |                        | 290   | 2.711 | 2.712 | 2.269 | 0.169 | 0.094 | 0.180 |                                        |
|              |                        | 300   | 2.768 | 2.719 | 2.269 | 0.173 | 0.097 | 0.180 |                                        |
| 310          | 2.710                  | 2.726 | 2.269 | 0.178 | 0.099 | 0.180 |       |       |                                        |
| 320          | 2.713                  | 2.732 | 2.269 | 0.182 | 0.102 | 0.180 |       |       |                                        |
| 330          | 2.734                  | 2.739 | 2.269 | 0.186 | 0.104 | 0.180 |       |       |                                        |
| 340          | 2.757                  | 2.745 | 2.269 | 0.190 | 0.107 | 0.180 |       |       |                                        |
| 350          | 2.763                  | 2.752 | 2.269 | 0.194 | 0.109 | 0.180 |       |       |                                        |
| 360          | 2.759                  | 2.758 | 2.269 | 0.198 | 0.112 | 0.180 |       |       |                                        |
|              | $c^{(AFP)} = 5$<br>nM  |       |       |       |       |       |       |       | $\tilde{c}^{(AFP)} \approx 4.4321$ nM  |
|              | $c^{(PTH)} = 50$<br>nM |       |       |       |       |       |       |       | $\tilde{c}^{(PTH)} \approx 95.5883$ nM |

|              |                        |       |       |       |       |       |       |                                           |                                          |
|--------------|------------------------|-------|-------|-------|-------|-------|-------|-------------------------------------------|------------------------------------------|
|              |                        | 370   | 2.771 | 2.764 | 2.269 | 0.201 | 0.114 | 0.180                                     |                                          |
|              |                        | 380   | 2.805 | 2.771 | 2.269 | 0.205 | 0.117 | 0.180                                     |                                          |
|              |                        | 390   | 2.775 | 2.777 | 2.269 | 0.209 | 0.119 | 0.180                                     |                                          |
|              |                        | 400   | 2.769 | 2.782 | 2.269 | 0.212 | 0.121 | 0.180                                     |                                          |
|              |                        | 410   | 2.741 | 2.788 | 2.269 | 0.216 | 0.124 | 0.180                                     |                                          |
|              |                        | 420   | 2.772 | 2.794 | 2.269 | 0.219 | 0.126 | 0.180                                     |                                          |
|              |                        | 430   | 2.790 | 2.800 | 2.269 | 0.223 | 0.128 | 0.180                                     |                                          |
|              |                        | 440   | 2.804 | 2.805 | 2.269 | 0.226 | 0.130 | 0.180                                     |                                          |
|              |                        | 450   | 2.787 | 2.811 | 2.269 | 0.229 | 0.132 | 0.180                                     |                                          |
|              |                        | 460   | 2.814 | 2.816 | 2.269 | 0.233 | 0.135 | 0.180                                     |                                          |
|              |                        | 470   | 2.817 | 2.821 | 2.269 | 0.236 | 0.137 | 0.180                                     |                                          |
|              |                        | 480   | 2.813 | 2.826 | 2.269 | 0.239 | 0.139 | 0.180                                     |                                          |
|              |                        | 490   | 2.809 | 2.832 | 2.269 | 0.242 | 0.141 | 0.180                                     |                                          |
|              |                        | 500   | 2.795 | 2.837 | 2.269 | 0.245 | 0.143 | 0.180                                     |                                          |
|              |                        | 510   | 2.841 | 2.841 | 2.269 | 0.248 | 0.145 | 0.180                                     |                                          |
|              |                        | 520   | 2.840 | 2.846 | 2.269 | 0.251 | 0.147 | 0.180                                     |                                          |
|              |                        | 530   | 2.817 | 2.851 | 2.269 | 0.254 | 0.149 | 0.180                                     |                                          |
|              |                        | 540   | 2.831 | 2.856 | 2.269 | 0.256 | 0.151 | 0.180                                     |                                          |
|              |                        | 550   | 2.847 | 2.860 | 2.269 | 0.259 | 0.153 | 0.180                                     |                                          |
|              |                        | 560   | 2.849 | 2.865 | 2.269 | 0.262 | 0.155 | 0.180                                     |                                          |
|              |                        | 570   | 2.840 | 2.869 | 2.269 | 0.264 | 0.156 | 0.180                                     |                                          |
|              |                        | 580   | 2.857 | 2.874 | 2.269 | 0.267 | 0.158 | 0.180                                     |                                          |
|              |                        | 590   | 2.859 | 2.878 | 2.269 | 0.269 | 0.160 | 0.180                                     |                                          |
|              |                        | 600   | 2.857 | 2.882 | 2.269 | 0.272 | 0.162 | 0.180                                     |                                          |
| GFET<br>#M21 | $c^{(CEA)} = 5$<br>nM  | -50   | 2.281 | 2.278 | -     | -     | -     | -                                         | $\tilde{c}^{(CEA)} \approx$<br>3.8654 nM |
|              |                        | -40   | 2.272 | 2.278 |       |       |       |                                           |                                          |
|              |                        | -30   | 2.268 | 2.278 |       |       |       |                                           |                                          |
|              |                        | -20   | 2.266 | 2.278 |       |       |       |                                           |                                          |
|              |                        | -10   | 2.289 | 2.278 |       |       |       |                                           |                                          |
|              | 0                      | 2.289 | 2.278 | 2.278 | 0.000 | 0.000 | 0.000 |                                           |                                          |
|              | 10                     | 2.361 | 2.315 | 2.278 | 0.005 | 0.010 | 0.023 |                                           |                                          |
|              | 20                     | 2.373 | 2.349 | 2.278 | 0.010 | 0.019 | 0.043 |                                           |                                          |
|              | 30                     | 2.416 | 2.381 | 2.278 | 0.015 | 0.028 | 0.060 |                                           |                                          |
|              | 40                     | 2.456 | 2.411 | 2.278 | 0.020 | 0.037 | 0.076 |                                           |                                          |
|              | $c^{(AFP)} = 20$<br>nM | 50    | 2.469 | 2.439 | 2.278 | 0.024 | 0.046 | 0.090                                     |                                          |
|              |                        | 60    | 2.474 | 2.464 | 2.278 | 0.029 | 0.055 | 0.103                                     |                                          |
|              | $c^{(PTH)} = 2$<br>nM  | 70    | 2.503 | 2.489 | 2.278 | 0.034 | 0.063 | 0.114                                     |                                          |
|              |                        | 80    | 2.520 | 2.511 | 2.278 | 0.038 | 0.071 | 0.124                                     |                                          |
|              |                        | 90    | 2.533 | 2.532 | 2.278 | 0.043 | 0.079 | 0.133                                     |                                          |
|              |                        | 100   | 2.570 | 2.552 | 2.278 | 0.047 | 0.087 | 0.141                                     |                                          |
|              |                        | 110   | 2.575 | 2.571 | 2.278 | 0.051 | 0.095 | 0.148                                     |                                          |
|              |                        | 120   | 2.591 | 2.589 | 2.278 | 0.055 | 0.102 | 0.154                                     |                                          |
|              |                        | 130   | 2.598 | 2.606 | 2.278 | 0.060 | 0.110 | 0.159                                     |                                          |
|              |                        | 140   | 2.603 | 2.622 | 2.278 | 0.064 | 0.117 | 0.164                                     |                                          |
| 150          |                        | 2.638 | 2.637 | 2.278 | 0.068 | 0.124 | 0.168 |                                           |                                          |
| 160          |                        | 2.629 | 2.652 | 2.278 | 0.072 | 0.131 | 0.172 |                                           |                                          |
|              |                        |       |       |       |       |       |       | $\tilde{c}^{(AFP)} \approx$<br>15.0141 nM |                                          |
|              |                        |       |       |       |       |       |       | $\tilde{c}^{(PTH)} \approx$<br>9.1678 nM  |                                          |

|              |                       |     |       |       |       |       |       |       |                                        |
|--------------|-----------------------|-----|-------|-------|-------|-------|-------|-------|----------------------------------------|
|              |                       | 170 | 2.673 | 2.666 | 2.278 | 0.075 | 0.137 | 0.176 |                                        |
|              |                       | 180 | 2.664 | 2.679 | 2.278 | 0.079 | 0.144 | 0.179 |                                        |
|              |                       | 190 | 2.707 | 2.692 | 2.278 | 0.083 | 0.150 | 0.182 |                                        |
|              |                       | 200 | 2.672 | 2.704 | 2.278 | 0.087 | 0.156 | 0.184 |                                        |
|              |                       | 210 | 2.688 | 2.716 | 2.278 | 0.090 | 0.162 | 0.186 |                                        |
|              |                       | 220 | 2.719 | 2.728 | 2.278 | 0.094 | 0.168 | 0.188 |                                        |
|              |                       | 230 | 2.718 | 2.738 | 2.278 | 0.097 | 0.174 | 0.190 |                                        |
|              |                       | 240 | 2.734 | 2.749 | 2.278 | 0.101 | 0.179 | 0.191 |                                        |
|              |                       | 250 | 2.751 | 2.759 | 2.278 | 0.104 | 0.185 | 0.193 |                                        |
|              |                       | 260 | 2.740 | 2.769 | 2.278 | 0.107 | 0.190 | 0.194 |                                        |
|              |                       | 270 | 2.753 | 2.779 | 2.278 | 0.111 | 0.195 | 0.195 |                                        |
|              |                       | 280 | 2.764 | 2.788 | 2.278 | 0.114 | 0.201 | 0.196 |                                        |
|              |                       | 290 | 2.765 | 2.797 | 2.278 | 0.117 | 0.206 | 0.197 |                                        |
|              |                       | 300 | 2.790 | 2.806 | 2.278 | 0.120 | 0.210 | 0.197 |                                        |
|              |                       | 310 | 2.805 | 2.814 | 2.278 | 0.123 | 0.215 | 0.198 |                                        |
|              |                       | 320 | 2.807 | 2.822 | 2.278 | 0.126 | 0.220 | 0.199 |                                        |
|              |                       | 330 | 2.812 | 2.830 | 2.278 | 0.129 | 0.224 | 0.199 |                                        |
|              |                       | 340 | 2.803 | 2.838 | 2.278 | 0.132 | 0.229 | 0.200 |                                        |
|              |                       | 350 | 2.818 | 2.846 | 2.278 | 0.135 | 0.233 | 0.200 |                                        |
|              |                       | 360 | 2.828 | 2.853 | 2.278 | 0.138 | 0.237 | 0.200 |                                        |
|              |                       | 370 | 2.836 | 2.860 | 2.278 | 0.140 | 0.242 | 0.201 |                                        |
|              |                       | 380 | 2.834 | 2.867 | 2.278 | 0.143 | 0.246 | 0.201 |                                        |
|              |                       | 390 | 2.868 | 2.874 | 2.278 | 0.146 | 0.249 | 0.201 |                                        |
|              |                       | 400 | 2.838 | 2.881 | 2.278 | 0.148 | 0.253 | 0.202 |                                        |
|              |                       | 410 | 2.855 | 2.888 | 2.278 | 0.151 | 0.257 | 0.202 |                                        |
|              |                       | 420 | 2.866 | 2.894 | 2.278 | 0.154 | 0.261 | 0.202 |                                        |
|              |                       | 430 | 2.880 | 2.900 | 2.278 | 0.156 | 0.264 | 0.202 |                                        |
|              |                       | 440 | 2.898 | 2.906 | 2.278 | 0.158 | 0.268 | 0.202 |                                        |
|              |                       | 450 | 2.896 | 2.912 | 2.278 | 0.161 | 0.271 | 0.202 |                                        |
|              |                       | 460 | 2.904 | 2.918 | 2.278 | 0.163 | 0.275 | 0.203 |                                        |
|              |                       | 470 | 2.901 | 2.924 | 2.278 | 0.166 | 0.278 | 0.203 |                                        |
|              |                       | 480 | 2.921 | 2.929 | 2.278 | 0.168 | 0.281 | 0.203 |                                        |
|              |                       | 490 | 2.951 | 2.935 | 2.278 | 0.170 | 0.284 | 0.203 |                                        |
|              |                       | 500 | 2.931 | 2.940 | 2.278 | 0.172 | 0.287 | 0.203 |                                        |
|              |                       | 510 | 2.947 | 2.945 | 2.278 | 0.175 | 0.290 | 0.203 |                                        |
|              |                       | 520 | 2.919 | 2.950 | 2.278 | 0.177 | 0.293 | 0.203 |                                        |
|              |                       | 530 | 2.936 | 2.955 | 2.278 | 0.179 | 0.296 | 0.203 |                                        |
|              |                       | 540 | 2.955 | 2.960 | 2.278 | 0.181 | 0.299 | 0.203 |                                        |
|              |                       | 550 | 2.966 | 2.965 | 2.278 | 0.183 | 0.301 | 0.203 |                                        |
|              |                       | 560 | 2.983 | 2.970 | 2.278 | 0.185 | 0.304 | 0.203 |                                        |
|              |                       | 570 | 2.976 | 2.974 | 2.278 | 0.187 | 0.307 | 0.203 |                                        |
|              |                       | 580 | 2.965 | 2.979 | 2.278 | 0.189 | 0.309 | 0.203 |                                        |
|              |                       | 590 | 2.957 | 2.983 | 2.278 | 0.191 | 0.311 | 0.203 |                                        |
|              |                       | 600 | 2.971 | 2.987 | 2.278 | 0.193 | 0.314 | 0.203 |                                        |
| GFET<br>#M22 | $c^{(CEA)} = 5$<br>nM | -50 | 2.261 | 2.270 | -     | -     | -     | -     | $\bar{c}^{(CEA)} \approx$<br>4.5169 nM |
|              |                       | -40 | 2.275 | 2.270 |       |       |       |       |                                        |

|                        |       |       |       |       |       |       |       |                                         |
|------------------------|-------|-------|-------|-------|-------|-------|-------|-----------------------------------------|
| $c^{(AFP)} = 20$<br>nM | -30   | 2.260 | 2.270 |       |       |       |       | $\bar{c}^{(AFP)} \approx$<br>16.1332 nM |
|                        | -20   | 2.278 | 2.270 |       |       |       |       |                                         |
|                        | -10   | 2.274 | 2.270 |       |       |       |       |                                         |
| $c^{(PTH)} = 5$<br>nM  | 0     | 2.274 | 2.270 | 2.270 | 0.000 | 0.000 | 0.000 | $\bar{c}^{(PTH)} \approx$<br>17.1893 nM |
|                        | 10    | 2.334 | 2.318 | 2.270 | 0.006 | 0.010 | 0.032 |                                         |
|                        | 20    | 2.383 | 2.360 | 2.270 | 0.012 | 0.021 | 0.057 |                                         |
|                        | 30    | 2.408 | 2.397 | 2.270 | 0.017 | 0.031 | 0.078 |                                         |
|                        | 40    | 2.461 | 2.429 | 2.270 | 0.023 | 0.040 | 0.096 |                                         |
|                        | 50    | 2.480 | 2.459 | 2.270 | 0.028 | 0.050 | 0.110 |                                         |
|                        | 60    | 2.490 | 2.485 | 2.270 | 0.034 | 0.059 | 0.122 |                                         |
|                        | 70    | 2.518 | 2.509 | 2.270 | 0.039 | 0.068 | 0.131 |                                         |
|                        | 80    | 2.554 | 2.530 | 2.270 | 0.044 | 0.077 | 0.139 |                                         |
|                        | 90    | 2.571 | 2.550 | 2.270 | 0.049 | 0.086 | 0.145 |                                         |
|                        | 100   | 2.584 | 2.569 | 2.270 | 0.054 | 0.094 | 0.151 |                                         |
|                        | 110   | 2.618 | 2.586 | 2.270 | 0.059 | 0.102 | 0.155 |                                         |
|                        | 120   | 2.595 | 2.603 | 2.270 | 0.064 | 0.110 | 0.158 |                                         |
|                        | 130   | 2.584 | 2.618 | 2.270 | 0.068 | 0.118 | 0.161 |                                         |
|                        | 140   | 2.647 | 2.632 | 2.270 | 0.073 | 0.126 | 0.164 |                                         |
|                        | 150   | 2.645 | 2.646 | 2.270 | 0.077 | 0.133 | 0.166 |                                         |
|                        | 160   | 2.672 | 2.659 | 2.270 | 0.082 | 0.140 | 0.167 |                                         |
|                        | 170   | 2.687 | 2.672 | 2.270 | 0.086 | 0.147 | 0.169 |                                         |
|                        | 180   | 2.695 | 2.684 | 2.270 | 0.090 | 0.154 | 0.170 |                                         |
|                        | 190   | 2.697 | 2.696 | 2.270 | 0.094 | 0.161 | 0.170 |                                         |
|                        | 200   | 2.691 | 2.707 | 2.270 | 0.099 | 0.167 | 0.171 |                                         |
|                        | 210   | 2.709 | 2.718 | 2.270 | 0.103 | 0.174 | 0.172 |                                         |
|                        | 220   | 2.741 | 2.729 | 2.270 | 0.106 | 0.180 | 0.172 |                                         |
|                        | 230   | 2.715 | 2.739 | 2.270 | 0.110 | 0.186 | 0.173 |                                         |
|                        | 240   | 2.746 | 2.749 | 2.270 | 0.114 | 0.192 | 0.173 |                                         |
|                        | 250   | 2.752 | 2.759 | 2.270 | 0.118 | 0.198 | 0.173 |                                         |
|                        | 260   | 2.760 | 2.769 | 2.270 | 0.121 | 0.203 | 0.173 |                                         |
|                        | 270   | 2.768 | 2.778 | 2.270 | 0.125 | 0.209 | 0.174 |                                         |
|                        | 280   | 2.765 | 2.787 | 2.270 | 0.129 | 0.214 | 0.174 |                                         |
|                        | 290   | 2.798 | 2.796 | 2.270 | 0.132 | 0.220 | 0.174 |                                         |
|                        | 300   | 2.811 | 2.804 | 2.270 | 0.135 | 0.225 | 0.174 |                                         |
|                        | 310   | 2.791 | 2.813 | 2.270 | 0.139 | 0.230 | 0.174 |                                         |
|                        | 320   | 2.819 | 2.821 | 2.270 | 0.142 | 0.235 | 0.174 |                                         |
|                        | 330   | 2.840 | 2.829 | 2.270 | 0.145 | 0.239 | 0.174 |                                         |
|                        | 340   | 2.820 | 2.837 | 2.270 | 0.148 | 0.244 | 0.174 |                                         |
|                        | 350   | 2.822 | 2.844 | 2.270 | 0.151 | 0.248 | 0.174 |                                         |
|                        | 360   | 2.842 | 2.852 | 2.270 | 0.154 | 0.253 | 0.174 |                                         |
|                        | 370   | 2.862 | 2.859 | 2.270 | 0.157 | 0.257 | 0.174 |                                         |
|                        | 380   | 2.848 | 2.866 | 2.270 | 0.160 | 0.261 | 0.174 |                                         |
|                        | 390   | 2.863 | 2.873 | 2.270 | 0.163 | 0.265 | 0.174 |                                         |
|                        | 400   | 2.872 | 2.880 | 2.270 | 0.166 | 0.269 | 0.174 |                                         |
|                        | 410   | 2.880 | 2.886 | 2.270 | 0.168 | 0.273 | 0.174 |                                         |
| 420                    | 2.897 | 2.893 | 2.270 | 0.171 | 0.277 | 0.174 |       |                                         |

|              |                        |       |       |       |       |       |       |                                      |                                     |
|--------------|------------------------|-------|-------|-------|-------|-------|-------|--------------------------------------|-------------------------------------|
|              |                        | 430   | 2.893 | 2.899 | 2.270 | 0.174 | 0.281 | 0.174                                |                                     |
|              |                        | 440   | 2.888 | 2.905 | 2.270 | 0.176 | 0.284 | 0.174                                |                                     |
|              |                        | 450   | 2.889 | 2.911 | 2.270 | 0.179 | 0.288 | 0.174                                |                                     |
|              |                        | 460   | 2.927 | 2.917 | 2.270 | 0.181 | 0.291 | 0.174                                |                                     |
|              |                        | 470   | 2.922 | 2.923 | 2.270 | 0.184 | 0.295 | 0.174                                |                                     |
|              |                        | 480   | 2.921 | 2.929 | 2.270 | 0.186 | 0.298 | 0.174                                |                                     |
|              |                        | 490   | 2.916 | 2.934 | 2.270 | 0.188 | 0.301 | 0.174                                |                                     |
|              |                        | 500   | 2.933 | 2.940 | 2.270 | 0.191 | 0.304 | 0.174                                |                                     |
|              |                        | 510   | 2.944 | 2.945 | 2.270 | 0.193 | 0.307 | 0.174                                |                                     |
|              |                        | 520   | 2.923 | 2.950 | 2.270 | 0.195 | 0.310 | 0.174                                |                                     |
|              |                        | 530   | 2.951 | 2.955 | 2.270 | 0.197 | 0.313 | 0.174                                |                                     |
|              |                        | 540   | 2.972 | 2.960 | 2.270 | 0.199 | 0.316 | 0.174                                |                                     |
|              |                        | 550   | 2.948 | 2.965 | 2.270 | 0.202 | 0.319 | 0.174                                |                                     |
|              |                        | 560   | 2.966 | 2.970 | 2.270 | 0.204 | 0.321 | 0.174                                |                                     |
|              |                        | 570   | 2.962 | 2.974 | 2.270 | 0.206 | 0.324 | 0.174                                |                                     |
|              |                        | 580   | 3.004 | 2.979 | 2.270 | 0.208 | 0.327 | 0.174                                |                                     |
|              |                        | 590   | 3.000 | 2.983 | 2.270 | 0.210 | 0.329 | 0.174                                |                                     |
|              |                        | 600   | 2.996 | 2.988 | 2.270 | 0.211 | 0.332 | 0.174                                |                                     |
| GFET<br>#M23 | $c^{(CEA)} = 5$<br>nM  | -50   | 2.266 | 2.257 | -     | -     | -     | -                                    | $\bar{c}^{(CEA)} \approx 4.3209$ nM |
|              |                        | -40   | 2.255 | 2.257 |       |       |       |                                      |                                     |
|              |                        | -30   | 2.241 | 2.257 |       |       |       |                                      |                                     |
|              |                        | -20   | 2.274 | 2.257 |       |       |       |                                      |                                     |
|              |                        | -10   | 2.252 | 2.257 |       |       |       |                                      |                                     |
|              | 0                      | 2.252 | 2.257 | 2.257 | 0.000 | 0.000 | 0.000 |                                      |                                     |
|              | 10                     | 2.333 | 2.346 | 2.257 | 0.006 | 0.009 | 0.074 |                                      |                                     |
|              | 20                     | 2.359 | 2.407 | 2.257 | 0.012 | 0.018 | 0.120 |                                      |                                     |
|              | 30                     | 2.439 | 2.450 | 2.257 | 0.018 | 0.027 | 0.148 |                                      |                                     |
|              | 40                     | 2.490 | 2.482 | 2.257 | 0.024 | 0.036 | 0.166 |                                      |                                     |
|              | 50                     | 2.494 | 2.508 | 2.257 | 0.030 | 0.044 | 0.177 |                                      |                                     |
|              | 60                     | 2.515 | 2.528 | 2.257 | 0.035 | 0.052 | 0.184 |                                      |                                     |
|              | 70                     | 2.538 | 2.546 | 2.257 | 0.041 | 0.061 | 0.188 |                                      |                                     |
|              | 80                     | 2.545 | 2.562 | 2.257 | 0.046 | 0.068 | 0.191 |                                      |                                     |
|              | 90                     | 2.605 | 2.577 | 2.257 | 0.052 | 0.076 | 0.193 |                                      |                                     |
|              | 100                    | 2.585 | 2.591 | 2.257 | 0.057 | 0.084 | 0.194 |                                      |                                     |
|              | 110                    | 2.594 | 2.604 | 2.257 | 0.062 | 0.091 | 0.194 |                                      |                                     |
|              | 120                    | 2.628 | 2.617 | 2.257 | 0.067 | 0.098 | 0.195 |                                      |                                     |
|              | 130                    | 2.665 | 2.629 | 2.257 | 0.072 | 0.105 | 0.195 |                                      |                                     |
|              | 140                    | 2.655 | 2.641 | 2.257 | 0.077 | 0.112 | 0.195 |                                      |                                     |
|              | 150                    | 2.635 | 2.652 | 2.257 | 0.082 | 0.119 | 0.195 |                                      |                                     |
|              | 160                    | 2.668 | 2.664 | 2.257 | 0.086 | 0.126 | 0.195 |                                      |                                     |
|              | 170                    | 2.668 | 2.675 | 2.257 | 0.091 | 0.132 | 0.195 |                                      |                                     |
| 180          | 2.691                  | 2.685 | 2.257 | 0.095 | 0.138 | 0.195 |       |                                      |                                     |
| 190          | 2.691                  | 2.696 | 2.257 | 0.100 | 0.144 | 0.195 |       |                                      |                                     |
| 200          | 2.698                  | 2.706 | 2.257 | 0.104 | 0.150 | 0.195 |       |                                      |                                     |
| 210          | 2.707                  | 2.717 | 2.257 | 0.108 | 0.156 | 0.195 |       |                                      |                                     |
| 220          | 2.733                  | 2.727 | 2.257 | 0.113 | 0.162 | 0.195 |       |                                      |                                     |
|              | $c^{(AFP)} = 20$<br>nM |       |       |       |       |       |       | $\bar{c}^{(AFP)} \approx 13.9763$ nM |                                     |
|              | $c^{(PTH)} = 20$<br>nM |       |       |       |       |       |       | $\bar{c}^{(PTH)} \approx 44.2076$ nM |                                     |

|              |                        |       |       |       |       |       |       |       |                                            |
|--------------|------------------------|-------|-------|-------|-------|-------|-------|-------|--------------------------------------------|
|              |                        | 230   | 2.748 | 2.736 | 2.257 | 0.117 | 0.168 | 0.195 |                                            |
|              |                        | 240   | 2.740 | 2.746 | 2.257 | 0.121 | 0.173 | 0.195 |                                            |
|              |                        | 250   | 2.737 | 2.755 | 2.257 | 0.125 | 0.179 | 0.195 |                                            |
|              |                        | 260   | 2.751 | 2.764 | 2.257 | 0.129 | 0.184 | 0.195 |                                            |
|              |                        | 270   | 2.763 | 2.773 | 2.257 | 0.132 | 0.189 | 0.195 |                                            |
|              |                        | 280   | 2.782 | 2.782 | 2.257 | 0.136 | 0.194 | 0.195 |                                            |
|              |                        | 290   | 2.795 | 2.791 | 2.257 | 0.140 | 0.199 | 0.195 |                                            |
|              |                        | 300   | 2.789 | 2.799 | 2.257 | 0.143 | 0.204 | 0.195 |                                            |
|              |                        | 310   | 2.790 | 2.807 | 2.257 | 0.147 | 0.208 | 0.195 |                                            |
|              |                        | 320   | 2.817 | 2.815 | 2.257 | 0.150 | 0.213 | 0.195 |                                            |
|              |                        | 330   | 2.824 | 2.823 | 2.257 | 0.154 | 0.217 | 0.195 |                                            |
|              |                        | 340   | 2.814 | 2.831 | 2.257 | 0.157 | 0.222 | 0.195 |                                            |
|              |                        | 350   | 2.842 | 2.838 | 2.257 | 0.160 | 0.226 | 0.195 |                                            |
|              |                        | 360   | 2.846 | 2.846 | 2.257 | 0.164 | 0.230 | 0.195 |                                            |
|              |                        | 370   | 2.857 | 2.853 | 2.257 | 0.167 | 0.234 | 0.195 |                                            |
|              |                        | 380   | 2.830 | 2.860 | 2.257 | 0.170 | 0.238 | 0.195 |                                            |
|              |                        | 390   | 2.878 | 2.867 | 2.257 | 0.173 | 0.242 | 0.195 |                                            |
|              |                        | 400   | 2.844 | 2.874 | 2.257 | 0.176 | 0.246 | 0.195 |                                            |
|              |                        | 410   | 2.857 | 2.881 | 2.257 | 0.179 | 0.250 | 0.195 |                                            |
|              |                        | 420   | 2.876 | 2.887 | 2.257 | 0.182 | 0.253 | 0.195 |                                            |
|              |                        | 430   | 2.891 | 2.894 | 2.257 | 0.185 | 0.257 | 0.195 |                                            |
|              |                        | 440   | 2.902 | 2.900 | 2.257 | 0.187 | 0.261 | 0.195 |                                            |
|              |                        | 450   | 2.904 | 2.906 | 2.257 | 0.190 | 0.264 | 0.195 |                                            |
|              |                        | 460   | 2.907 | 2.912 | 2.257 | 0.193 | 0.267 | 0.195 |                                            |
|              |                        | 470   | 2.912 | 2.918 | 2.257 | 0.196 | 0.271 | 0.195 |                                            |
|              |                        | 480   | 2.934 | 2.924 | 2.257 | 0.198 | 0.274 | 0.195 |                                            |
|              |                        | 490   | 2.911 | 2.929 | 2.257 | 0.201 | 0.277 | 0.195 |                                            |
|              |                        | 500   | 2.897 | 2.935 | 2.257 | 0.203 | 0.280 | 0.195 |                                            |
|              |                        | 510   | 2.945 | 2.940 | 2.257 | 0.206 | 0.283 | 0.195 |                                            |
|              |                        | 520   | 2.960 | 2.946 | 2.257 | 0.208 | 0.286 | 0.195 |                                            |
|              |                        | 530   | 2.967 | 2.951 | 2.257 | 0.210 | 0.289 | 0.195 |                                            |
|              |                        | 540   | 2.966 | 2.956 | 2.257 | 0.213 | 0.291 | 0.195 |                                            |
|              |                        | 550   | 2.957 | 2.961 | 2.257 | 0.215 | 0.294 | 0.195 |                                            |
|              |                        | 560   | 2.942 | 2.966 | 2.257 | 0.217 | 0.297 | 0.195 |                                            |
|              |                        | 570   | 2.965 | 2.971 | 2.257 | 0.219 | 0.299 | 0.195 |                                            |
|              |                        | 580   | 2.968 | 2.975 | 2.257 | 0.222 | 0.302 | 0.195 |                                            |
|              |                        | 590   | 2.989 | 2.980 | 2.257 | 0.224 | 0.304 | 0.195 |                                            |
|              |                        | 600   | 2.980 | 2.985 | 2.257 | 0.226 | 0.307 | 0.195 |                                            |
| GFET<br>#M24 | $c^{(CEA)} = 5$<br>nM  | -50   | 2.267 | 2.260 | -     | -     | -     | -     | $\tilde{c}^{(CEA)} \approx$<br>4.3147 nM   |
|              |                        | -40   | 2.252 | 2.260 |       |       |       |       |                                            |
|              |                        | -30   | 2.284 | 2.260 |       |       |       |       |                                            |
|              | $c^{(AFP)} = 20$<br>nM | -20   | 2.267 | 2.260 | -     | -     | -     | -     | $\tilde{c}^{(AFP)} \approx$<br>14.0023 nM  |
|              |                        | -10   | 2.246 | 2.260 |       |       |       |       |                                            |
|              | $c^{(PTH)} = 50$<br>nM | 0     | 2.246 | 2.260 | 2.260 | 0.000 | 0.000 | 0.000 | $\tilde{c}^{(PTH)} \approx$<br>111.2235 nM |
|              |                        | 10    | 2.390 | 2.415 | 2.260 | 0.006 | 0.010 | 0.139 |                                            |
| 20           |                        | 2.391 | 2.474 | 2.260 | 0.011 | 0.019 | 0.183 |       |                                            |

|     |       |       |       |       |       |       |
|-----|-------|-------|-------|-------|-------|-------|
| 30  | 2.482 | 2.502 | 2.260 | 0.017 | 0.028 | 0.197 |
| 40  | 2.509 | 2.521 | 2.260 | 0.022 | 0.037 | 0.201 |
| 50  | 2.545 | 2.536 | 2.260 | 0.027 | 0.046 | 0.202 |
| 60  | 2.545 | 2.550 | 2.260 | 0.033 | 0.055 | 0.203 |
| 70  | 2.547 | 2.564 | 2.260 | 0.038 | 0.063 | 0.203 |
| 80  | 2.591 | 2.577 | 2.260 | 0.043 | 0.071 | 0.203 |
| 90  | 2.596 | 2.590 | 2.260 | 0.048 | 0.080 | 0.203 |
| 100 | 2.621 | 2.603 | 2.260 | 0.053 | 0.087 | 0.203 |
| 110 | 2.630 | 2.616 | 2.260 | 0.057 | 0.095 | 0.203 |
| 120 | 2.633 | 2.628 | 2.260 | 0.062 | 0.103 | 0.203 |
| 130 | 2.656 | 2.640 | 2.260 | 0.067 | 0.110 | 0.203 |
| 140 | 2.664 | 2.651 | 2.260 | 0.071 | 0.117 | 0.203 |
| 150 | 2.655 | 2.663 | 2.260 | 0.075 | 0.124 | 0.203 |
| 160 | 2.687 | 2.674 | 2.260 | 0.080 | 0.131 | 0.203 |
| 170 | 2.707 | 2.685 | 2.260 | 0.084 | 0.138 | 0.203 |
| 180 | 2.687 | 2.696 | 2.260 | 0.088 | 0.144 | 0.203 |
| 190 | 2.702 | 2.706 | 2.260 | 0.092 | 0.151 | 0.203 |
| 200 | 2.709 | 2.717 | 2.260 | 0.096 | 0.157 | 0.203 |
| 210 | 2.721 | 2.727 | 2.260 | 0.100 | 0.163 | 0.203 |
| 220 | 2.735 | 2.737 | 2.260 | 0.104 | 0.169 | 0.203 |
| 230 | 2.747 | 2.746 | 2.260 | 0.108 | 0.175 | 0.203 |
| 240 | 2.744 | 2.756 | 2.260 | 0.112 | 0.181 | 0.203 |
| 250 | 2.771 | 2.765 | 2.260 | 0.116 | 0.186 | 0.203 |
| 260 | 2.787 | 2.774 | 2.260 | 0.119 | 0.192 | 0.203 |
| 270 | 2.776 | 2.783 | 2.260 | 0.123 | 0.197 | 0.203 |
| 280 | 2.780 | 2.792 | 2.260 | 0.126 | 0.202 | 0.203 |
| 290 | 2.789 | 2.800 | 2.260 | 0.130 | 0.208 | 0.203 |
| 300 | 2.775 | 2.809 | 2.260 | 0.133 | 0.213 | 0.203 |
| 310 | 2.821 | 2.817 | 2.260 | 0.136 | 0.217 | 0.203 |
| 320 | 2.829 | 2.825 | 2.260 | 0.140 | 0.222 | 0.203 |
| 330 | 2.814 | 2.833 | 2.260 | 0.143 | 0.227 | 0.203 |
| 340 | 2.833 | 2.841 | 2.260 | 0.146 | 0.232 | 0.203 |
| 350 | 2.835 | 2.848 | 2.260 | 0.149 | 0.236 | 0.203 |
| 360 | 2.845 | 2.855 | 2.260 | 0.152 | 0.240 | 0.203 |
| 370 | 2.851 | 2.863 | 2.260 | 0.155 | 0.245 | 0.203 |
| 380 | 2.841 | 2.870 | 2.260 | 0.158 | 0.249 | 0.203 |
| 390 | 2.860 | 2.877 | 2.260 | 0.161 | 0.253 | 0.203 |
| 400 | 2.885 | 2.884 | 2.260 | 0.164 | 0.257 | 0.203 |
| 410 | 2.913 | 2.890 | 2.260 | 0.166 | 0.261 | 0.203 |
| 420 | 2.872 | 2.897 | 2.260 | 0.169 | 0.265 | 0.203 |
| 430 | 2.885 | 2.903 | 2.260 | 0.172 | 0.268 | 0.203 |
| 440 | 2.904 | 2.909 | 2.260 | 0.174 | 0.272 | 0.203 |
| 450 | 2.888 | 2.915 | 2.260 | 0.177 | 0.276 | 0.203 |
| 460 | 2.924 | 2.921 | 2.260 | 0.179 | 0.279 | 0.203 |
| 470 | 2.889 | 2.927 | 2.260 | 0.182 | 0.282 | 0.203 |
| 480 | 2.915 | 2.933 | 2.260 | 0.184 | 0.286 | 0.203 |

|              |                       |                        |       |       |       |       |       |       |                                          |                                           |
|--------------|-----------------------|------------------------|-------|-------|-------|-------|-------|-------|------------------------------------------|-------------------------------------------|
|              |                       | 490                    | 2.918 | 2.939 | 2.260 | 0.187 | 0.289 | 0.203 |                                          |                                           |
|              |                       | 500                    | 2.928 | 2.944 | 2.260 | 0.189 | 0.292 | 0.203 |                                          |                                           |
|              |                       | 510                    | 2.950 | 2.950 | 2.260 | 0.191 | 0.295 | 0.203 |                                          |                                           |
|              |                       | 520                    | 2.942 | 2.955 | 2.260 | 0.194 | 0.298 | 0.203 |                                          |                                           |
|              |                       | 530                    | 2.970 | 2.960 | 2.260 | 0.196 | 0.301 | 0.203 |                                          |                                           |
|              |                       | 540                    | 2.956 | 2.965 | 2.260 | 0.198 | 0.304 | 0.203 |                                          |                                           |
|              |                       | 550                    | 2.952 | 2.970 | 2.260 | 0.200 | 0.307 | 0.203 |                                          |                                           |
|              |                       | 560                    | 2.951 | 2.975 | 2.260 | 0.202 | 0.310 | 0.203 |                                          |                                           |
|              |                       | 570                    | 2.985 | 2.980 | 2.260 | 0.204 | 0.313 | 0.203 |                                          |                                           |
|              |                       | 580                    | 2.973 | 2.985 | 2.260 | 0.206 | 0.315 | 0.203 |                                          |                                           |
|              |                       | 590                    | 2.971 | 2.989 | 2.260 | 0.208 | 0.318 | 0.203 |                                          |                                           |
|              |                       | 600                    | 2.970 | 2.994 | 2.260 | 0.210 | 0.320 | 0.203 |                                          |                                           |
| GFET<br>#M25 | $c^{(CEA)} = 5$<br>nM | -50                    | 2.261 | 2.260 |       |       |       |       | $\tilde{c}^{(CEA)} \approx$<br>3.8532 nM |                                           |
|              |                       | -40                    | 2.266 | 2.260 |       |       |       |       |                                          |                                           |
|              |                       | -30                    | 2.265 | 2.260 | -     | -     | -     | -     |                                          |                                           |
|              |                       | -20                    | 2.249 | 2.260 |       |       |       |       |                                          |                                           |
|              |                       | -10                    | 2.259 | 2.260 |       |       |       |       |                                          |                                           |
|              |                       | 0                      | 2.259 | 2.260 | 2.260 | 0.000 | 0.000 | 0.000 |                                          |                                           |
|              |                       | 10                     | 2.363 | 2.307 | 2.260 | 0.005 | 0.015 | 0.026 |                                          |                                           |
|              |                       | 20                     | 2.418 | 2.350 | 2.260 | 0.010 | 0.030 | 0.050 |                                          |                                           |
|              |                       | 30                     | 2.463 | 2.390 | 2.260 | 0.015 | 0.045 | 0.070 |                                          |                                           |
|              |                       | 40                     | 2.486 | 2.427 | 2.260 | 0.020 | 0.059 | 0.089 |                                          |                                           |
|              |                       | 50                     | 2.494 | 2.462 | 2.260 | 0.024 | 0.073 | 0.105 |                                          |                                           |
|              |                       | 60                     | 2.525 | 2.494 | 2.260 | 0.029 | 0.086 | 0.120 |                                          |                                           |
|              |                       | 70                     | 2.570 | 2.525 | 2.260 | 0.034 | 0.099 | 0.133 |                                          |                                           |
|              |                       | 80                     | 2.600 | 2.553 | 2.260 | 0.038 | 0.111 | 0.144 |                                          |                                           |
|              |                       | 90                     | 2.609 | 2.580 | 2.260 | 0.042 | 0.123 | 0.154 |                                          |                                           |
|              |                       | 100                    | 2.604 | 2.605 | 2.260 | 0.047 | 0.135 | 0.164 |                                          |                                           |
|              |                       | $c^{(AFP)} = 50$<br>nM | 110   | 2.624 | 2.628 | 2.260 | 0.051 | 0.146 | 0.172                                    | $\tilde{c}^{(AFP)} \approx$<br>23.1433 nM |
|              |                       |                        | 120   | 2.682 | 2.651 | 2.260 | 0.055 | 0.157 | 0.179                                    |                                           |
|              |                       | $c^{(PTH)} = 2$<br>nM  | 130   | 2.666 | 2.672 | 2.260 | 0.059 | 0.168 | 0.185                                    | $\tilde{c}^{(PTH)} \approx$<br>9.2344 nM  |
|              |                       |                        | 140   | 2.695 | 2.692 | 2.260 | 0.063 | 0.178 | 0.191                                    |                                           |
|              |                       |                        | 150   | 2.707 | 2.711 | 2.260 | 0.067 | 0.188 | 0.196                                    |                                           |
|              |                       |                        | 160   | 2.742 | 2.729 | 2.260 | 0.071 | 0.197 | 0.200                                    |                                           |
|              |                       |                        | 170   | 2.713 | 2.746 | 2.260 | 0.075 | 0.207 | 0.204                                    |                                           |
|              |                       |                        | 180   | 2.730 | 2.762 | 2.260 | 0.079 | 0.216 | 0.208                                    |                                           |
|              |                       |                        | 190   | 2.772 | 2.778 | 2.260 | 0.083 | 0.224 | 0.211                                    |                                           |
|              |                       |                        | 200   | 2.799 | 2.793 | 2.260 | 0.086 | 0.233 | 0.214                                    |                                           |
|              |                       |                        | 210   | 2.787 | 2.807 | 2.260 | 0.090 | 0.241 | 0.216                                    |                                           |
|              |                       |                        | 220   | 2.839 | 2.821 | 2.260 | 0.093 | 0.249 | 0.218                                    |                                           |
|              | 230                   |                        | 2.810 | 2.834 | 2.260 | 0.097 | 0.257 | 0.220 |                                          |                                           |
|              | 240                   |                        | 2.845 | 2.846 | 2.260 | 0.100 | 0.264 | 0.222 |                                          |                                           |
|              | 250                   |                        | 2.853 | 2.859 | 2.260 | 0.104 | 0.271 | 0.224 |                                          |                                           |
|              | 260                   |                        | 2.860 | 2.870 | 2.260 | 0.107 | 0.278 | 0.225 |                                          |                                           |
|              | 270                   |                        | 2.872 | 2.881 | 2.260 | 0.110 | 0.285 | 0.226 |                                          |                                           |
|              | 280                   |                        | 2.865 | 2.892 | 2.260 | 0.113 | 0.292 | 0.227 |                                          |                                           |



|              |                        |       |       |       |       |       |       |                                           |                                           |
|--------------|------------------------|-------|-------|-------|-------|-------|-------|-------------------------------------------|-------------------------------------------|
|              |                        | 290   | 2.889 | 2.903 | 2.260 | 0.116 | 0.298 | 0.228                                     |                                           |
|              |                        | 300   | 2.887 | 2.913 | 2.260 | 0.120 | 0.304 | 0.229                                     |                                           |
|              |                        | 310   | 2.902 | 2.923 | 2.260 | 0.123 | 0.310 | 0.230                                     |                                           |
|              |                        | 320   | 2.921 | 2.932 | 2.260 | 0.126 | 0.316 | 0.231                                     |                                           |
|              |                        | 330   | 2.938 | 2.941 | 2.260 | 0.129 | 0.322 | 0.231                                     |                                           |
|              |                        | 340   | 2.924 | 2.950 | 2.260 | 0.131 | 0.327 | 0.232                                     |                                           |
|              |                        | 350   | 2.938 | 2.959 | 2.260 | 0.134 | 0.332 | 0.232                                     |                                           |
|              |                        | 360   | 2.954 | 2.967 | 2.260 | 0.137 | 0.338 | 0.233                                     |                                           |
|              |                        | 370   | 2.947 | 2.975 | 2.260 | 0.140 | 0.342 | 0.233                                     |                                           |
|              |                        | 380   | 2.990 | 2.983 | 2.260 | 0.142 | 0.347 | 0.233                                     |                                           |
|              |                        | 390   | 2.957 | 2.990 | 2.260 | 0.145 | 0.352 | 0.234                                     |                                           |
|              |                        | 400   | 2.990 | 2.998 | 2.260 | 0.148 | 0.356 | 0.234                                     |                                           |
|              |                        | 410   | 2.990 | 3.005 | 2.260 | 0.150 | 0.361 | 0.234                                     |                                           |
|              |                        | 420   | 2.969 | 3.012 | 2.260 | 0.153 | 0.365 | 0.234                                     |                                           |
|              |                        | 430   | 2.979 | 3.019 | 2.260 | 0.155 | 0.369 | 0.235                                     |                                           |
|              |                        | 440   | 3.018 | 3.025 | 2.260 | 0.158 | 0.373 | 0.235                                     |                                           |
|              |                        | 450   | 3.004 | 3.032 | 2.260 | 0.160 | 0.377 | 0.235                                     |                                           |
|              |                        | 460   | 3.001 | 3.038 | 2.260 | 0.163 | 0.380 | 0.235                                     |                                           |
|              |                        | 470   | 3.044 | 3.044 | 2.260 | 0.165 | 0.384 | 0.235                                     |                                           |
|              |                        | 480   | 3.035 | 3.050 | 2.260 | 0.167 | 0.388 | 0.235                                     |                                           |
|              |                        | 490   | 3.016 | 3.055 | 2.260 | 0.169 | 0.391 | 0.235                                     |                                           |
|              |                        | 500   | 3.067 | 3.061 | 2.260 | 0.172 | 0.394 | 0.235                                     |                                           |
|              |                        | 510   | 3.046 | 3.066 | 2.260 | 0.174 | 0.397 | 0.235                                     |                                           |
|              |                        | 520   | 3.050 | 3.072 | 2.260 | 0.176 | 0.400 | 0.236                                     |                                           |
|              |                        | 530   | 3.089 | 3.077 | 2.260 | 0.178 | 0.403 | 0.236                                     |                                           |
|              |                        | 540   | 3.080 | 3.082 | 2.260 | 0.180 | 0.406 | 0.236                                     |                                           |
|              |                        | 550   | 3.103 | 3.087 | 2.260 | 0.182 | 0.409 | 0.236                                     |                                           |
|              |                        | 560   | 3.075 | 3.091 | 2.260 | 0.184 | 0.412 | 0.236                                     |                                           |
|              |                        | 570   | 3.084 | 3.096 | 2.260 | 0.186 | 0.414 | 0.236                                     |                                           |
|              |                        | 580   | 3.115 | 3.100 | 2.260 | 0.188 | 0.417 | 0.236                                     |                                           |
|              |                        | 590   | 3.093 | 3.105 | 2.260 | 0.190 | 0.419 | 0.236                                     |                                           |
|              |                        | 600   | 3.099 | 3.109 | 2.260 | 0.192 | 0.422 | 0.236                                     |                                           |
| GFET<br>#M26 | $c^{(CEA)} = 5$<br>nM  | -50   | 2.308 | 2.289 | -     | -     | -     | -                                         | $\tilde{c}^{(CEA)} \approx$<br>4.5213 nM  |
|              |                        | -40   | 2.287 | 2.289 |       |       |       |                                           |                                           |
|              |                        | -30   | 2.293 | 2.289 |       |       |       |                                           |                                           |
|              |                        | -20   | 2.284 | 2.289 |       |       |       |                                           |                                           |
|              |                        | -10   | 2.281 | 2.289 |       |       |       |                                           |                                           |
|              | 0                      | 2.281 | 2.289 | 2.289 | 0.000 | 0.000 | 0.000 | $\tilde{c}^{(AFP)} \approx$<br>28.1665 nM |                                           |
|              | $c^{(AFP)} = 50$<br>nM | 10    | 2.357 | 2.344 | 2.289 | 0.006 | 0.018 |                                           | 0.031                                     |
|              |                        | 20    | 2.444 | 2.393 | 2.289 | 0.012 | 0.036 |                                           | 0.057                                     |
|              | $c^{(PTH)} = 5$<br>nM  | 30    | 2.486 | 2.437 | 2.289 | 0.017 | 0.053 | 0.079                                     | $\tilde{c}^{(PTH)} \approx$<br>16.1764 nM |
|              |                        | 40    | 2.503 | 2.477 | 2.289 | 0.023 | 0.069 | 0.096                                     |                                           |
|              |                        | 50    | 2.529 | 2.513 | 2.289 | 0.028 | 0.085 | 0.111                                     |                                           |
|              |                        | 60    | 2.581 | 2.545 | 2.289 | 0.033 | 0.100 | 0.123                                     |                                           |
|              |                        | 70    | 2.607 | 2.575 | 2.289 | 0.039 | 0.115 | 0.133                                     |                                           |
| 80           |                        | 2.602 | 2.603 | 2.289 | 0.044 | 0.129 | 0.142 |                                           |                                           |

|     |       |       |       |       |       |       |
|-----|-------|-------|-------|-------|-------|-------|
| 90  | 2.644 | 2.628 | 2.289 | 0.049 | 0.142 | 0.149 |
| 100 | 2.636 | 2.652 | 2.289 | 0.054 | 0.155 | 0.154 |
| 110 | 2.656 | 2.674 | 2.289 | 0.059 | 0.168 | 0.159 |
| 120 | 2.724 | 2.695 | 2.289 | 0.063 | 0.180 | 0.163 |
| 130 | 2.714 | 2.715 | 2.289 | 0.068 | 0.192 | 0.166 |
| 140 | 2.717 | 2.733 | 2.289 | 0.073 | 0.203 | 0.169 |
| 150 | 2.735 | 2.751 | 2.289 | 0.077 | 0.214 | 0.171 |
| 160 | 2.745 | 2.767 | 2.289 | 0.081 | 0.225 | 0.173 |
| 170 | 2.758 | 2.783 | 2.289 | 0.086 | 0.235 | 0.174 |
| 180 | 2.778 | 2.799 | 2.289 | 0.090 | 0.244 | 0.176 |
| 190 | 2.789 | 2.813 | 2.289 | 0.094 | 0.254 | 0.177 |
| 200 | 2.808 | 2.827 | 2.289 | 0.098 | 0.263 | 0.178 |
| 210 | 2.821 | 2.841 | 2.289 | 0.102 | 0.272 | 0.178 |
| 220 | 2.817 | 2.854 | 2.289 | 0.106 | 0.280 | 0.179 |
| 230 | 2.824 | 2.866 | 2.289 | 0.110 | 0.288 | 0.179 |
| 240 | 2.862 | 2.878 | 2.289 | 0.114 | 0.296 | 0.180 |
| 250 | 2.880 | 2.890 | 2.289 | 0.117 | 0.304 | 0.180 |
| 260 | 2.894 | 2.901 | 2.289 | 0.121 | 0.311 | 0.180 |
| 270 | 2.882 | 2.912 | 2.289 | 0.124 | 0.318 | 0.181 |
| 280 | 2.899 | 2.922 | 2.289 | 0.128 | 0.325 | 0.181 |
| 290 | 2.922 | 2.932 | 2.289 | 0.131 | 0.331 | 0.181 |
| 300 | 2.925 | 2.942 | 2.289 | 0.135 | 0.337 | 0.181 |
| 310 | 2.931 | 2.951 | 2.289 | 0.138 | 0.343 | 0.181 |
| 320 | 2.958 | 2.960 | 2.289 | 0.141 | 0.349 | 0.181 |
| 330 | 2.993 | 2.969 | 2.289 | 0.144 | 0.355 | 0.181 |
| 340 | 2.975 | 2.978 | 2.289 | 0.147 | 0.360 | 0.181 |
| 350 | 2.974 | 2.986 | 2.289 | 0.151 | 0.365 | 0.182 |
| 360 | 2.995 | 2.994 | 2.289 | 0.154 | 0.370 | 0.182 |
| 370 | 3.004 | 3.002 | 2.289 | 0.156 | 0.375 | 0.182 |
| 380 | 3.007 | 3.010 | 2.289 | 0.159 | 0.380 | 0.182 |
| 390 | 3.016 | 3.017 | 2.289 | 0.162 | 0.385 | 0.182 |
| 400 | 3.000 | 3.024 | 2.289 | 0.165 | 0.389 | 0.182 |
| 410 | 3.000 | 3.031 | 2.289 | 0.168 | 0.393 | 0.182 |
| 420 | 3.027 | 3.038 | 2.289 | 0.170 | 0.397 | 0.182 |
| 430 | 3.037 | 3.044 | 2.289 | 0.173 | 0.401 | 0.182 |
| 440 | 3.035 | 3.051 | 2.289 | 0.175 | 0.405 | 0.182 |
| 450 | 3.057 | 3.057 | 2.289 | 0.178 | 0.408 | 0.182 |
| 460 | 3.050 | 3.063 | 2.289 | 0.180 | 0.412 | 0.182 |
| 470 | 3.062 | 3.068 | 2.289 | 0.183 | 0.415 | 0.182 |
| 480 | 3.056 | 3.074 | 2.289 | 0.185 | 0.418 | 0.182 |
| 490 | 3.080 | 3.080 | 2.289 | 0.188 | 0.422 | 0.182 |
| 500 | 3.079 | 3.085 | 2.289 | 0.190 | 0.425 | 0.182 |
| 510 | 3.098 | 3.090 | 2.289 | 0.192 | 0.427 | 0.182 |
| 520 | 3.094 | 3.095 | 2.289 | 0.194 | 0.430 | 0.182 |
| 530 | 3.083 | 3.100 | 2.289 | 0.196 | 0.433 | 0.182 |
| 540 | 3.090 | 3.105 | 2.289 | 0.199 | 0.436 | 0.182 |

|              |                        |       |       |       |       |       |       |                                        |                                       |
|--------------|------------------------|-------|-------|-------|-------|-------|-------|----------------------------------------|---------------------------------------|
|              |                        | 550   | 3.096 | 3.109 | 2.289 | 0.201 | 0.438 | 0.182                                  |                                       |
|              |                        | 560   | 3.105 | 3.114 | 2.289 | 0.203 | 0.440 | 0.182                                  |                                       |
|              |                        | 570   | 3.102 | 3.118 | 2.289 | 0.205 | 0.443 | 0.182                                  |                                       |
|              |                        | 580   | 3.125 | 3.122 | 2.289 | 0.207 | 0.445 | 0.182                                  |                                       |
|              |                        | 590   | 3.123 | 3.126 | 2.289 | 0.209 | 0.447 | 0.182                                  |                                       |
|              |                        | 600   | 3.120 | 3.130 | 2.289 | 0.210 | 0.449 | 0.182                                  |                                       |
| GFET<br>#M27 | $c^{(CEA)} = 5$<br>nM  | -50   | 2.263 | 2.263 | -     | -     | -     | -                                      | $\tilde{c}^{(CEA)} \approx 4.0389$ nM |
|              |                        | -40   | 2.248 | 2.263 |       |       |       |                                        |                                       |
|              |                        | -30   | 2.268 | 2.263 |       |       |       |                                        |                                       |
|              |                        | -20   | 2.265 | 2.263 |       |       |       |                                        |                                       |
|              |                        | -10   | 2.268 | 2.263 |       |       |       |                                        |                                       |
|              | 0                      | 2.268 | 2.263 | 2.263 | 0.000 | 0.000 | 0.000 |                                        |                                       |
|              | 10                     | 2.358 | 2.354 | 2.263 | 0.005 | 0.020 | 0.065 |                                        |                                       |
|              | 20                     | 2.457 | 2.418 | 2.263 | 0.011 | 0.039 | 0.105 |                                        |                                       |
|              | 30                     | 2.476 | 2.466 | 2.263 | 0.016 | 0.058 | 0.129 |                                        |                                       |
|              | 40                     | 2.548 | 2.504 | 2.263 | 0.021 | 0.076 | 0.144 |                                        |                                       |
|              | 50                     | 2.568 | 2.535 | 2.263 | 0.026 | 0.093 | 0.153 |                                        |                                       |
|              | 60                     | 2.587 | 2.562 | 2.263 | 0.031 | 0.109 | 0.158 |                                        |                                       |
|              | 70                     | 2.600 | 2.586 | 2.263 | 0.036 | 0.125 | 0.162 |                                        |                                       |
|              | 80                     | 2.637 | 2.608 | 2.263 | 0.040 | 0.141 | 0.164 |                                        |                                       |
|              | 90                     | 2.652 | 2.629 | 2.263 | 0.045 | 0.156 | 0.165 |                                        |                                       |
|              | 100                    | 2.641 | 2.648 | 2.263 | 0.049 | 0.170 | 0.165 |                                        |                                       |
|              | 110                    | 2.693 | 2.667 | 2.263 | 0.054 | 0.184 | 0.166 |                                        |                                       |
|              | 120                    | 2.695 | 2.685 | 2.263 | 0.058 | 0.197 | 0.166 |                                        |                                       |
|              | 130                    | 2.715 | 2.702 | 2.263 | 0.063 | 0.210 | 0.166 |                                        |                                       |
|              | 140                    | 2.705 | 2.719 | 2.263 | 0.067 | 0.222 | 0.166 |                                        |                                       |
|              | 150                    | 2.766 | 2.735 | 2.263 | 0.071 | 0.234 | 0.166 |                                        |                                       |
|              | 160                    | 2.750 | 2.751 | 2.263 | 0.075 | 0.246 | 0.167 |                                        |                                       |
|              | 170                    | 2.791 | 2.766 | 2.263 | 0.079 | 0.257 | 0.167 |                                        |                                       |
|              | 180                    | 2.796 | 2.780 | 2.263 | 0.083 | 0.267 | 0.167 |                                        |                                       |
|              | 190                    | 2.826 | 2.795 | 2.263 | 0.087 | 0.278 | 0.167 |                                        |                                       |
|              | 200                    | 2.806 | 2.808 | 2.263 | 0.091 | 0.288 | 0.167 |                                        |                                       |
|              | 210                    | 2.820 | 2.822 | 2.263 | 0.095 | 0.297 | 0.167 |                                        |                                       |
|              | 220                    | 2.832 | 2.835 | 2.263 | 0.098 | 0.306 | 0.167 |                                        |                                       |
|              | 230                    | 2.846 | 2.847 | 2.263 | 0.102 | 0.315 | 0.167 |                                        |                                       |
|              | 240                    | 2.857 | 2.859 | 2.263 | 0.106 | 0.324 | 0.167 |                                        |                                       |
|              | 250                    | 2.872 | 2.871 | 2.263 | 0.109 | 0.332 | 0.167 |                                        |                                       |
|              | 260                    | 2.878 | 2.882 | 2.263 | 0.113 | 0.340 | 0.167 |                                        |                                       |
|              | 270                    | 2.882 | 2.893 | 2.263 | 0.116 | 0.348 | 0.167 |                                        |                                       |
|              | 280                    | 2.891 | 2.904 | 2.263 | 0.119 | 0.355 | 0.167 |                                        |                                       |
| 290          | 2.922                  | 2.914 | 2.263 | 0.123 | 0.362 | 0.167 |       |                                        |                                       |
| 300          | 2.922                  | 2.925 | 2.263 | 0.126 | 0.369 | 0.167 |       |                                        |                                       |
| 310          | 2.948                  | 2.934 | 2.263 | 0.129 | 0.375 | 0.167 |       |                                        |                                       |
| 320          | 2.922                  | 2.944 | 2.263 | 0.132 | 0.382 | 0.167 |       |                                        |                                       |
| 330          | 2.928                  | 2.953 | 2.263 | 0.135 | 0.388 | 0.167 |       |                                        |                                       |
| 340          | 2.951                  | 2.962 | 2.263 | 0.138 | 0.394 | 0.167 |       |                                        |                                       |
|              | $c^{(AFP)} = 50$<br>nM |       |       |       |       |       |       | $\tilde{c}^{(AFP)} \approx 28.2776$ nM |                                       |
|              | $c^{(PTH)} = 20$<br>nM |       |       |       |       |       |       | $\tilde{c}^{(PTH)} \approx 46.5425$ nM |                                       |

|              |                        |       |       |       |       |       |       |       |                                          |                                            |
|--------------|------------------------|-------|-------|-------|-------|-------|-------|-------|------------------------------------------|--------------------------------------------|
|              |                        | 350   | 2.957 | 2.971 | 2.263 | 0.141 | 0.400 | 0.167 |                                          |                                            |
|              |                        | 360   | 2.960 | 2.979 | 2.263 | 0.144 | 0.405 | 0.167 |                                          |                                            |
|              |                        | 370   | 2.978 | 2.987 | 2.263 | 0.147 | 0.410 | 0.167 |                                          |                                            |
|              |                        | 380   | 2.977 | 2.995 | 2.263 | 0.150 | 0.415 | 0.167 |                                          |                                            |
|              |                        | 390   | 2.999 | 3.003 | 2.263 | 0.152 | 0.420 | 0.167 |                                          |                                            |
|              |                        | 400   | 2.990 | 3.010 | 2.263 | 0.155 | 0.425 | 0.167 |                                          |                                            |
|              |                        | 410   | 3.000 | 3.017 | 2.263 | 0.158 | 0.430 | 0.167 |                                          |                                            |
|              |                        | 420   | 3.028 | 3.024 | 2.263 | 0.160 | 0.434 | 0.167 |                                          |                                            |
|              |                        | 430   | 3.032 | 3.031 | 2.263 | 0.163 | 0.438 | 0.167 |                                          |                                            |
|              |                        | 440   | 3.028 | 3.038 | 2.263 | 0.165 | 0.442 | 0.167 |                                          |                                            |
|              |                        | 450   | 3.022 | 3.044 | 2.263 | 0.168 | 0.446 | 0.167 |                                          |                                            |
|              |                        | 460   | 3.043 | 3.050 | 2.263 | 0.170 | 0.450 | 0.167 |                                          |                                            |
|              |                        | 470   | 3.048 | 3.056 | 2.263 | 0.173 | 0.454 | 0.167 |                                          |                                            |
|              |                        | 480   | 3.049 | 3.062 | 2.263 | 0.175 | 0.457 | 0.167 |                                          |                                            |
|              |                        | 490   | 3.063 | 3.068 | 2.263 | 0.177 | 0.461 | 0.167 |                                          |                                            |
|              |                        | 500   | 3.052 | 3.074 | 2.263 | 0.180 | 0.464 | 0.167 |                                          |                                            |
|              |                        | 510   | 3.044 | 3.079 | 2.263 | 0.182 | 0.467 | 0.167 |                                          |                                            |
|              |                        | 520   | 3.084 | 3.084 | 2.263 | 0.184 | 0.470 | 0.167 |                                          |                                            |
|              |                        | 530   | 3.083 | 3.089 | 2.263 | 0.186 | 0.473 | 0.167 |                                          |                                            |
|              |                        | 540   | 3.094 | 3.094 | 2.263 | 0.188 | 0.476 | 0.167 |                                          |                                            |
|              |                        | 550   | 3.094 | 3.099 | 2.263 | 0.190 | 0.479 | 0.167 |                                          |                                            |
|              |                        | 560   | 3.087 | 3.104 | 2.263 | 0.193 | 0.481 | 0.167 |                                          |                                            |
|              |                        | 570   | 3.130 | 3.108 | 2.263 | 0.195 | 0.484 | 0.167 |                                          |                                            |
|              |                        | 580   | 3.093 | 3.113 | 2.263 | 0.196 | 0.486 | 0.167 |                                          |                                            |
|              |                        | 590   | 3.095 | 3.117 | 2.263 | 0.198 | 0.489 | 0.167 |                                          |                                            |
|              |                        | 600   | 3.120 | 3.121 | 2.263 | 0.200 | 0.491 | 0.167 |                                          |                                            |
| GFET<br>#M28 | $c^{(CEA)} = 5$<br>nM  | -50   | 2.293 | 2.275 | -     | -     | -     | -     | $\tilde{c}^{(CEA)} \approx$<br>3.8804 nM |                                            |
|              |                        | -40   | 2.272 | 2.275 |       |       |       |       |                                          |                                            |
|              |                        | -30   | 2.280 | 2.275 |       |       |       |       |                                          |                                            |
|              |                        | -20   | 2.266 | 2.275 |       |       |       |       |                                          |                                            |
|              |                        | -10   | 2.270 | 2.275 |       |       |       |       |                                          |                                            |
|              | 0                      | 2.270 | 2.275 | 2.275 | 0.000 | 0.000 | 0.000 |       |                                          |                                            |
|              | $c^{(AFP)} = 50$<br>nM | 10    | 2.397 | 2.416 | 2.275 | 0.005 | 0.020 | 0.116 |                                          | $\tilde{c}^{(AFP)} \approx$<br>28.7566 nM  |
|              |                        | 20    | 2.494 | 2.478 | 2.275 | 0.010 | 0.039 | 0.154 |                                          |                                            |
|              |                        | 30    | 2.496 | 2.514 | 2.275 | 0.015 | 0.057 | 0.166 |                                          |                                            |
|              |                        | 40    | 2.569 | 2.540 | 2.275 | 0.020 | 0.075 | 0.170 |                                          |                                            |
|              |                        | 50    | 2.579 | 2.563 | 2.275 | 0.025 | 0.092 | 0.171 |                                          |                                            |
|              | $c^{(PTH)} = 50$<br>nM | 60    | 2.626 | 2.585 | 2.275 | 0.030 | 0.109 | 0.172 |                                          | $\tilde{c}^{(PTH)} \approx$<br>108.4332 nM |
|              |                        | 70    | 2.630 | 2.606 | 2.275 | 0.034 | 0.125 | 0.172 |                                          |                                            |
|              |                        | 80    | 2.668 | 2.626 | 2.275 | 0.039 | 0.140 | 0.172 |                                          |                                            |
|              |                        | 90    | 2.667 | 2.645 | 2.275 | 0.043 | 0.155 | 0.172 |                                          |                                            |
|              |                        | 100   | 2.668 | 2.664 | 2.275 | 0.048 | 0.169 | 0.172 |                                          |                                            |
|              |                        | 110   | 2.684 | 2.682 | 2.275 | 0.052 | 0.182 | 0.172 |                                          |                                            |
| 120          |                        | 2.708 | 2.699 | 2.275 | 0.056 | 0.196 | 0.172 |       |                                          |                                            |
|              |                        | 130   | 2.738 | 2.716 | 2.275 | 0.061 | 0.208 | 0.172 |                                          |                                            |
|              |                        | 140   | 2.739 | 2.732 | 2.275 | 0.065 | 0.221 | 0.172 |                                          |                                            |

|     |       |       |       |       |       |       |
|-----|-------|-------|-------|-------|-------|-------|
| 150 | 2.746 | 2.748 | 2.275 | 0.069 | 0.232 | 0.172 |
| 160 | 2.757 | 2.763 | 2.275 | 0.073 | 0.244 | 0.172 |
| 170 | 2.785 | 2.778 | 2.275 | 0.077 | 0.255 | 0.172 |
| 180 | 2.775 | 2.793 | 2.275 | 0.081 | 0.265 | 0.172 |
| 190 | 2.809 | 2.807 | 2.275 | 0.084 | 0.275 | 0.172 |
| 200 | 2.815 | 2.820 | 2.275 | 0.088 | 0.285 | 0.172 |
| 210 | 2.837 | 2.833 | 2.275 | 0.092 | 0.294 | 0.172 |
| 220 | 2.847 | 2.846 | 2.275 | 0.095 | 0.304 | 0.172 |
| 230 | 2.840 | 2.858 | 2.275 | 0.099 | 0.312 | 0.172 |
| 240 | 2.883 | 2.870 | 2.275 | 0.102 | 0.321 | 0.172 |
| 250 | 2.881 | 2.882 | 2.275 | 0.106 | 0.329 | 0.172 |
| 260 | 2.905 | 2.893 | 2.275 | 0.109 | 0.337 | 0.172 |
| 270 | 2.905 | 2.904 | 2.275 | 0.113 | 0.344 | 0.172 |
| 280 | 2.906 | 2.914 | 2.275 | 0.116 | 0.351 | 0.172 |
| 290 | 2.909 | 2.924 | 2.275 | 0.119 | 0.358 | 0.172 |
| 300 | 2.920 | 2.934 | 2.275 | 0.122 | 0.365 | 0.172 |
| 310 | 2.937 | 2.944 | 2.275 | 0.125 | 0.371 | 0.172 |
| 320 | 2.945 | 2.953 | 2.275 | 0.128 | 0.378 | 0.172 |
| 330 | 2.963 | 2.962 | 2.275 | 0.131 | 0.384 | 0.172 |
| 340 | 2.949 | 2.971 | 2.275 | 0.134 | 0.390 | 0.172 |
| 350 | 2.960 | 2.979 | 2.275 | 0.137 | 0.395 | 0.172 |
| 360 | 2.948 | 2.987 | 2.275 | 0.140 | 0.400 | 0.172 |
| 370 | 3.023 | 2.995 | 2.275 | 0.143 | 0.406 | 0.172 |
| 380 | 2.980 | 3.003 | 2.275 | 0.146 | 0.411 | 0.172 |
| 390 | 3.005 | 3.011 | 2.275 | 0.148 | 0.415 | 0.172 |
| 400 | 2.984 | 3.018 | 2.275 | 0.151 | 0.420 | 0.172 |
| 410 | 3.025 | 3.025 | 2.275 | 0.154 | 0.425 | 0.172 |
| 420 | 2.988 | 3.032 | 2.275 | 0.156 | 0.429 | 0.172 |
| 430 | 3.038 | 3.039 | 2.275 | 0.159 | 0.433 | 0.172 |
| 440 | 3.047 | 3.045 | 2.275 | 0.161 | 0.437 | 0.172 |
| 450 | 3.026 | 3.051 | 2.275 | 0.164 | 0.441 | 0.172 |
| 460 | 3.040 | 3.057 | 2.275 | 0.166 | 0.444 | 0.172 |
| 470 | 3.035 | 3.063 | 2.275 | 0.168 | 0.448 | 0.172 |
| 480 | 3.041 | 3.069 | 2.275 | 0.171 | 0.451 | 0.172 |
| 490 | 3.043 | 3.075 | 2.275 | 0.173 | 0.455 | 0.172 |
| 500 | 3.081 | 3.080 | 2.275 | 0.175 | 0.458 | 0.172 |
| 510 | 3.083 | 3.085 | 2.275 | 0.177 | 0.461 | 0.172 |
| 520 | 3.089 | 3.091 | 2.275 | 0.180 | 0.464 | 0.172 |
| 530 | 3.096 | 3.096 | 2.275 | 0.182 | 0.467 | 0.172 |
| 540 | 3.113 | 3.100 | 2.275 | 0.184 | 0.470 | 0.172 |
| 550 | 3.102 | 3.105 | 2.275 | 0.186 | 0.472 | 0.172 |
| 560 | 3.103 | 3.110 | 2.275 | 0.188 | 0.475 | 0.172 |
| 570 | 3.098 | 3.114 | 2.275 | 0.190 | 0.477 | 0.172 |
| 580 | 3.098 | 3.118 | 2.275 | 0.192 | 0.480 | 0.172 |
| 590 | 3.111 | 3.123 | 2.275 | 0.194 | 0.482 | 0.172 |
| 600 | 3.114 | 3.127 | 2.275 | 0.196 | 0.484 | 0.172 |

|              |                                                                           |       |       |       |       |       |       |       |                                                                                                                          |
|--------------|---------------------------------------------------------------------------|-------|-------|-------|-------|-------|-------|-------|--------------------------------------------------------------------------------------------------------------------------|
| GFET<br>#M29 | $c^{(CEA)} = 5$<br>nM<br>$c^{(AFP)} = 100$<br>nM<br>$c^{(PTH)} = 2$<br>nM | -50   | 2.268 | 2.267 | -     | -     | -     | -     | $\tilde{c}^{(CEA)} \approx 3.9125$ nM<br>$\tilde{c}^{(AFP)} \approx 47.0676$ nM<br>$\tilde{c}^{(PTH)} \approx 4.9234$ nM |
|              |                                                                           | -40   | 2.278 | 2.267 |       |       |       |       |                                                                                                                          |
|              |                                                                           | -30   | 2.265 | 2.267 |       |       |       |       |                                                                                                                          |
|              |                                                                           | -20   | 2.259 | 2.267 |       |       |       |       |                                                                                                                          |
|              |                                                                           | -10   | 2.268 | 2.267 |       |       |       |       |                                                                                                                          |
|              |                                                                           | 0     | 2.268 | 2.267 | 2.267 | 0.000 | 0.000 | 0.000 |                                                                                                                          |
|              |                                                                           | 10    | 2.357 | 2.313 | 2.267 | 0.005 | 0.032 | 0.009 |                                                                                                                          |
|              |                                                                           | 20    | 2.427 | 2.357 | 2.267 | 0.010 | 0.062 | 0.017 |                                                                                                                          |
|              |                                                                           | 30    | 2.423 | 2.398 | 2.267 | 0.015 | 0.091 | 0.025 |                                                                                                                          |
|              |                                                                           | 40    | 2.502 | 2.437 | 2.267 | 0.020 | 0.118 | 0.032 |                                                                                                                          |
|              |                                                                           | 50    | 2.526 | 2.475 | 2.267 | 0.025 | 0.143 | 0.039 |                                                                                                                          |
|              |                                                                           | 60    | 2.554 | 2.510 | 2.267 | 0.030 | 0.167 | 0.045 |                                                                                                                          |
|              |                                                                           | 70    | 2.604 | 2.543 | 2.267 | 0.035 | 0.190 | 0.050 |                                                                                                                          |
|              |                                                                           | 80    | 2.630 | 2.575 | 2.267 | 0.039 | 0.212 | 0.056 |                                                                                                                          |
|              |                                                                           | 90    | 2.637 | 2.604 | 2.267 | 0.044 | 0.232 | 0.061 |                                                                                                                          |
|              |                                                                           | 100   | 2.666 | 2.633 | 2.267 | 0.048 | 0.252 | 0.065 |                                                                                                                          |
|              |                                                                           | 110   | 2.682 | 2.660 | 2.267 | 0.053 | 0.270 | 0.069 |                                                                                                                          |
|              |                                                                           | 120   | 2.717 | 2.685 | 2.267 | 0.057 | 0.287 | 0.073 |                                                                                                                          |
|              |                                                                           | 130   | 2.728 | 2.710 | 2.267 | 0.061 | 0.304 | 0.077 |                                                                                                                          |
|              |                                                                           | 140   | 2.756 | 2.733 | 2.267 | 0.066 | 0.319 | 0.080 |                                                                                                                          |
|              |                                                                           | 150   | 2.750 | 2.755 | 2.267 | 0.070 | 0.334 | 0.084 |                                                                                                                          |
|              |                                                                           | 160   | 2.774 | 2.776 | 2.267 | 0.074 | 0.348 | 0.087 |                                                                                                                          |
|              |                                                                           | 170   | 2.788 | 2.795 | 2.267 | 0.078 | 0.361 | 0.089 |                                                                                                                          |
|              |                                                                           | 180   | 2.828 | 2.814 | 2.267 | 0.082 | 0.373 | 0.092 |                                                                                                                          |
|              |                                                                           | 190   | 2.848 | 2.832 | 2.267 | 0.085 | 0.385 | 0.094 |                                                                                                                          |
|              |                                                                           | 200   | 2.851 | 2.849 | 2.267 | 0.089 | 0.396 | 0.096 |                                                                                                                          |
|              |                                                                           | 210   | 2.898 | 2.866 | 2.267 | 0.093 | 0.407 | 0.098 |                                                                                                                          |
|              |                                                                           | 220   | 2.888 | 2.881 | 2.267 | 0.097 | 0.417 | 0.100 |                                                                                                                          |
|              |                                                                           | 230   | 2.905 | 2.896 | 2.267 | 0.100 | 0.426 | 0.102 |                                                                                                                          |
|              |                                                                           | 240   | 2.904 | 2.910 | 2.267 | 0.104 | 0.435 | 0.104 |                                                                                                                          |
|              |                                                                           | 250   | 2.917 | 2.923 | 2.267 | 0.107 | 0.443 | 0.105 |                                                                                                                          |
|              |                                                                           | 260   | 2.945 | 2.936 | 2.267 | 0.111 | 0.451 | 0.106 |                                                                                                                          |
|              |                                                                           | 270   | 2.918 | 2.948 | 2.267 | 0.114 | 0.459 | 0.108 |                                                                                                                          |
|              |                                                                           | 280   | 2.929 | 2.960 | 2.267 | 0.117 | 0.466 | 0.109 |                                                                                                                          |
|              |                                                                           | 290   | 2.965 | 2.971 | 2.267 | 0.120 | 0.473 | 0.110 |                                                                                                                          |
|              |                                                                           | 300   | 2.977 | 2.981 | 2.267 | 0.124 | 0.479 | 0.111 |                                                                                                                          |
|              |                                                                           | 310   | 2.978 | 2.992 | 2.267 | 0.127 | 0.485 | 0.112 |                                                                                                                          |
|              |                                                                           | 320   | 3.001 | 3.001 | 2.267 | 0.130 | 0.491 | 0.113 |                                                                                                                          |
|              |                                                                           | 330   | 2.998 | 3.010 | 2.267 | 0.133 | 0.496 | 0.114 |                                                                                                                          |
|              |                                                                           | 340   | 2.978 | 3.019 | 2.267 | 0.136 | 0.501 | 0.115 |                                                                                                                          |
| 350          | 2.988                                                                     | 3.028 | 2.267 | 0.139 | 0.506 | 0.115 |       |       |                                                                                                                          |
| 360          | 3.007                                                                     | 3.036 | 2.267 | 0.142 | 0.511 | 0.116 |       |       |                                                                                                                          |
| 370          | 3.040                                                                     | 3.044 | 2.267 | 0.145 | 0.515 | 0.117 |       |       |                                                                                                                          |
| 380          | 3.020                                                                     | 3.051 | 2.267 | 0.147 | 0.519 | 0.117 |       |       |                                                                                                                          |
| 390          | 3.013                                                                     | 3.058 | 2.267 | 0.150 | 0.523 | 0.118 |       |       |                                                                                                                          |
| 400          | 3.057                                                                     | 3.065 | 2.267 | 0.153 | 0.527 | 0.118 |       |       |                                                                                                                          |

|              |                         |       |       |       |       |       |       |                                      |                                     |       |                                      |
|--------------|-------------------------|-------|-------|-------|-------|-------|-------|--------------------------------------|-------------------------------------|-------|--------------------------------------|
|              |                         | 410   | 3.053 | 3.072 | 2.267 | 0.155 | 0.530 | 0.119                                |                                     |       |                                      |
|              |                         | 420   | 3.047 | 3.078 | 2.267 | 0.158 | 0.533 | 0.119                                |                                     |       |                                      |
|              |                         | 430   | 3.046 | 3.084 | 2.267 | 0.160 | 0.537 | 0.119                                |                                     |       |                                      |
|              |                         | 440   | 3.072 | 3.090 | 2.267 | 0.163 | 0.539 | 0.120                                |                                     |       |                                      |
|              |                         | 450   | 3.054 | 3.095 | 2.267 | 0.165 | 0.542 | 0.120                                |                                     |       |                                      |
|              |                         | 460   | 3.075 | 3.101 | 2.267 | 0.168 | 0.545 | 0.121                                |                                     |       |                                      |
|              |                         | 470   | 3.070 | 3.106 | 2.267 | 0.170 | 0.547 | 0.121                                |                                     |       |                                      |
|              |                         | 480   | 3.083 | 3.111 | 2.267 | 0.173 | 0.550 | 0.121                                |                                     |       |                                      |
|              |                         | 490   | 3.111 | 3.116 | 2.267 | 0.175 | 0.552 | 0.121                                |                                     |       |                                      |
|              |                         | 500   | 3.095 | 3.120 | 2.267 | 0.177 | 0.554 | 0.122                                |                                     |       |                                      |
|              |                         | 510   | 3.124 | 3.125 | 2.267 | 0.179 | 0.556 | 0.122                                |                                     |       |                                      |
|              |                         | 520   | 3.108 | 3.129 | 2.267 | 0.182 | 0.558 | 0.122                                |                                     |       |                                      |
|              |                         | 530   | 3.126 | 3.133 | 2.267 | 0.184 | 0.560 | 0.122                                |                                     |       |                                      |
|              |                         | 540   | 3.121 | 3.137 | 2.267 | 0.186 | 0.561 | 0.122                                |                                     |       |                                      |
|              |                         | 550   | 3.114 | 3.141 | 2.267 | 0.188 | 0.563 | 0.123                                |                                     |       |                                      |
|              |                         | 560   | 3.130 | 3.145 | 2.267 | 0.190 | 0.564 | 0.123                                |                                     |       |                                      |
|              |                         | 570   | 3.165 | 3.148 | 2.267 | 0.192 | 0.566 | 0.123                                |                                     |       |                                      |
|              |                         | 580   | 3.138 | 3.152 | 2.267 | 0.194 | 0.567 | 0.123                                |                                     |       |                                      |
|              |                         | 590   | 3.160 | 3.155 | 2.267 | 0.196 | 0.568 | 0.123                                |                                     |       |                                      |
|              |                         | 600   | 3.159 | 3.158 | 2.267 | 0.198 | 0.570 | 0.123                                |                                     |       |                                      |
| GFET<br>#M30 | $c^{(CEA)} = 5$<br>nM   | -50   | 2.243 | 2.254 | -     | -     | -     | -                                    | $\bar{c}^{(CEA)} \approx 4.5876$ nM |       |                                      |
|              |                         | -40   | 2.249 | 2.254 |       |       |       |                                      |                                     |       |                                      |
|              |                         | -30   | 2.249 | 2.254 |       |       |       |                                      |                                     |       |                                      |
|              |                         | -20   | 2.251 | 2.254 |       |       |       |                                      |                                     |       |                                      |
|              |                         | -10   | 2.268 | 2.254 |       |       |       |                                      |                                     |       |                                      |
|              | 0                       | 2.268 | 2.254 | 2.254 | 0.000 | 0.000 | 0.000 | $\bar{c}^{(AFP)} \approx 49.2144$ nM |                                     |       |                                      |
|              | 10                      | 2.361 | 2.314 | 2.254 | 0.005 | 0.034 | 0.020 |                                      |                                     |       |                                      |
|              | 20                      | 2.431 | 2.369 | 2.254 | 0.011 | 0.066 | 0.037 |                                      |                                     |       |                                      |
|              | 30                      | 2.434 | 2.419 | 2.254 | 0.016 | 0.097 | 0.052 |                                      |                                     |       |                                      |
|              | 40                      | 2.510 | 2.465 | 2.254 | 0.021 | 0.126 | 0.064 |                                      |                                     |       |                                      |
|              | 50                      | 2.564 | 2.508 | 2.254 | 0.026 | 0.153 | 0.075 |                                      |                                     |       |                                      |
|              | 60                      | 2.589 | 2.547 | 2.254 | 0.031 | 0.178 | 0.084 |                                      |                                     |       |                                      |
|              | $c^{(AFP)} = 100$<br>nM | 70    | 2.613 | 2.584 | 2.254 | 0.036 | 0.203 |                                      |                                     | 0.091 | $\bar{c}^{(PTH)} \approx 13.8805$ nM |
|              |                         | 80    | 2.657 | 2.618 | 2.254 | 0.040 | 0.225 |                                      |                                     | 0.097 |                                      |
|              |                         | 90    | 2.688 | 2.649 | 2.254 | 0.045 | 0.247 |                                      |                                     | 0.103 |                                      |
|              |                         | 100   | 2.693 | 2.678 | 2.254 | 0.049 | 0.267 |                                      |                                     | 0.107 |                                      |
|              |                         | 110   | 2.706 | 2.706 | 2.254 | 0.054 | 0.286 |                                      |                                     | 0.111 |                                      |
|              |                         | 120   | 2.720 | 2.732 | 2.254 | 0.058 | 0.305 |                                      |                                     | 0.115 |                                      |
|              |                         | 130   | 2.794 | 2.756 | 2.254 | 0.062 | 0.322 |                                      |                                     | 0.117 |                                      |
|              |                         | 140   | 2.790 | 2.779 | 2.254 | 0.067 | 0.338 |                                      |                                     | 0.120 |                                      |
|              |                         | 150   | 2.799 | 2.800 | 2.254 | 0.071 | 0.353 |                                      |                                     | 0.122 |                                      |
|              |                         | 160   | 2.801 | 2.820 | 2.254 | 0.075 | 0.367 |                                      |                                     | 0.123 |                                      |
|              |                         | 170   | 2.834 | 2.839 | 2.254 | 0.079 | 0.381 |                                      |                                     | 0.125 |                                      |
| 180          |                         | 2.836 | 2.857 | 2.254 | 0.082 | 0.394 | 0.126 |                                      |                                     |       |                                      |
| 190          |                         | 2.873 | 2.874 | 2.254 | 0.086 | 0.406 | 0.127 |                                      |                                     |       |                                      |
| 200          | 2.861                   | 2.890 | 2.254 | 0.090 | 0.417 | 0.128 |       |                                      |                                     |       |                                      |

|              |                         |     |       |       |       |       |       |       |                                        |   |   |   |                                         |
|--------------|-------------------------|-----|-------|-------|-------|-------|-------|-------|----------------------------------------|---|---|---|-----------------------------------------|
|              |                         | 210 | 2.907 | 2.905 | 2.254 | 0.094 | 0.428 | 0.129 |                                        |   |   |   |                                         |
|              |                         | 220 | 2.871 | 2.919 | 2.254 | 0.097 | 0.438 | 0.129 |                                        |   |   |   |                                         |
|              |                         | 230 | 2.905 | 2.933 | 2.254 | 0.101 | 0.448 | 0.130 |                                        |   |   |   |                                         |
|              |                         | 240 | 2.925 | 2.946 | 2.254 | 0.104 | 0.457 | 0.130 |                                        |   |   |   |                                         |
|              |                         | 250 | 2.939 | 2.958 | 2.254 | 0.108 | 0.465 | 0.131 |                                        |   |   |   |                                         |
|              |                         | 260 | 2.934 | 2.970 | 2.254 | 0.111 | 0.474 | 0.131 |                                        |   |   |   |                                         |
|              |                         | 270 | 2.957 | 2.981 | 2.254 | 0.114 | 0.481 | 0.131 |                                        |   |   |   |                                         |
|              |                         | 280 | 2.969 | 2.992 | 2.254 | 0.117 | 0.488 | 0.132 |                                        |   |   |   |                                         |
|              |                         | 290 | 2.967 | 3.002 | 2.254 | 0.120 | 0.495 | 0.132 |                                        |   |   |   |                                         |
|              |                         | 300 | 2.985 | 3.011 | 2.254 | 0.123 | 0.502 | 0.132 |                                        |   |   |   |                                         |
|              |                         | 310 | 2.980 | 3.021 | 2.254 | 0.126 | 0.508 | 0.132 |                                        |   |   |   |                                         |
|              |                         | 320 | 3.032 | 3.029 | 2.254 | 0.129 | 0.513 | 0.132 |                                        |   |   |   |                                         |
|              |                         | 330 | 3.000 | 3.038 | 2.254 | 0.132 | 0.519 | 0.132 |                                        |   |   |   |                                         |
|              |                         | 340 | 3.002 | 3.046 | 2.254 | 0.135 | 0.524 | 0.132 |                                        |   |   |   |                                         |
|              |                         | 350 | 3.031 | 3.053 | 2.254 | 0.138 | 0.529 | 0.132 |                                        |   |   |   |                                         |
|              |                         | 360 | 3.046 | 3.061 | 2.254 | 0.141 | 0.533 | 0.132 |                                        |   |   |   |                                         |
|              |                         | 370 | 3.049 | 3.068 | 2.254 | 0.143 | 0.537 | 0.133 |                                        |   |   |   |                                         |
|              |                         | 380 | 3.052 | 3.074 | 2.254 | 0.146 | 0.541 | 0.133 |                                        |   |   |   |                                         |
|              |                         | 390 | 3.091 | 3.081 | 2.254 | 0.148 | 0.545 | 0.133 |                                        |   |   |   |                                         |
|              |                         | 400 | 3.076 | 3.087 | 2.254 | 0.151 | 0.549 | 0.133 |                                        |   |   |   |                                         |
|              |                         | 410 | 3.082 | 3.093 | 2.254 | 0.153 | 0.552 | 0.133 |                                        |   |   |   |                                         |
|              |                         | 420 | 3.088 | 3.099 | 2.254 | 0.156 | 0.556 | 0.133 |                                        |   |   |   |                                         |
|              |                         | 430 | 3.112 | 3.104 | 2.254 | 0.158 | 0.559 | 0.133 |                                        |   |   |   |                                         |
|              |                         | 440 | 3.101 | 3.109 | 2.254 | 0.161 | 0.561 | 0.133 |                                        |   |   |   |                                         |
|              |                         | 450 | 3.094 | 3.114 | 2.254 | 0.163 | 0.564 | 0.133 |                                        |   |   |   |                                         |
|              |                         | 460 | 3.118 | 3.119 | 2.254 | 0.165 | 0.567 | 0.133 |                                        |   |   |   |                                         |
|              |                         | 470 | 3.121 | 3.124 | 2.254 | 0.167 | 0.569 | 0.133 |                                        |   |   |   |                                         |
|              |                         | 480 | 3.120 | 3.128 | 2.254 | 0.169 | 0.571 | 0.133 |                                        |   |   |   |                                         |
|              |                         | 490 | 3.125 | 3.132 | 2.254 | 0.172 | 0.573 | 0.133 |                                        |   |   |   |                                         |
|              |                         | 500 | 3.116 | 3.136 | 2.254 | 0.174 | 0.575 | 0.133 |                                        |   |   |   |                                         |
|              |                         | 510 | 3.128 | 3.140 | 2.254 | 0.176 | 0.577 | 0.133 |                                        |   |   |   |                                         |
|              |                         | 520 | 3.136 | 3.144 | 2.254 | 0.178 | 0.579 | 0.133 |                                        |   |   |   |                                         |
|              |                         | 530 | 3.149 | 3.148 | 2.254 | 0.180 | 0.581 | 0.133 |                                        |   |   |   |                                         |
|              |                         | 540 | 3.131 | 3.151 | 2.254 | 0.182 | 0.582 | 0.133 |                                        |   |   |   |                                         |
|              |                         | 550 | 3.107 | 3.155 | 2.254 | 0.183 | 0.584 | 0.133 |                                        |   |   |   |                                         |
|              |                         | 560 | 3.130 | 3.158 | 2.254 | 0.185 | 0.585 | 0.133 |                                        |   |   |   |                                         |
|              |                         | 570 | 3.138 | 3.161 | 2.254 | 0.187 | 0.587 | 0.133 |                                        |   |   |   |                                         |
|              |                         | 580 | 3.178 | 3.164 | 2.254 | 0.189 | 0.588 | 0.133 |                                        |   |   |   |                                         |
|              |                         | 590 | 3.144 | 3.167 | 2.254 | 0.191 | 0.589 | 0.133 |                                        |   |   |   |                                         |
|              |                         | 600 | 3.143 | 3.170 | 2.254 | 0.192 | 0.590 | 0.133 |                                        |   |   |   |                                         |
| GFET<br>#M31 | $c^{(CEA)} = 5$<br>nM   | -50 | 2.255 | 2.268 | -     | -     | -     | -     | $\bar{c}^{(CEA)} \approx$<br>3.6107 nM |   |   |   |                                         |
|              |                         | -40 | 2.273 | 2.268 |       |       |       |       |                                        |   |   |   |                                         |
|              | $c^{(AFP)} =$<br>100 nM | -30 | 2.267 | 2.268 |       |       |       |       | -                                      | - | - | - | $\bar{c}^{(AFP)} \approx$<br>49.1247 nM |
|              |                         | -20 | 2.241 | 2.268 |       |       |       |       |                                        |   |   |   |                                         |
|              |                         | -10 | 2.287 | 2.268 |       |       |       |       |                                        |   |   |   |                                         |
|              | $c^{(PTH)} = 20$<br>nM  | 0   | 2.287 | 2.268 |       |       |       |       |                                        |   |   |   | 2.268                                   |



|     |       |       |       |       |       |       |
|-----|-------|-------|-------|-------|-------|-------|
| 10  | 2.378 | 2.348 | 2.268 | 0.004 | 0.036 | 0.041 |
| 20  | 2.478 | 2.414 | 2.268 | 0.008 | 0.069 | 0.069 |
| 30  | 2.503 | 2.469 | 2.268 | 0.011 | 0.101 | 0.088 |
| 40  | 2.525 | 2.516 | 2.268 | 0.015 | 0.131 | 0.102 |
| 50  | 2.593 | 2.557 | 2.268 | 0.019 | 0.159 | 0.111 |
| 60  | 2.601 | 2.593 | 2.268 | 0.022 | 0.185 | 0.117 |
| 70  | 2.661 | 2.626 | 2.268 | 0.026 | 0.211 | 0.122 |
| 80  | 2.685 | 2.656 | 2.268 | 0.029 | 0.234 | 0.125 |
| 90  | 2.701 | 2.684 | 2.268 | 0.033 | 0.257 | 0.127 |
| 100 | 2.706 | 2.710 | 2.268 | 0.036 | 0.278 | 0.128 |
| 110 | 2.739 | 2.735 | 2.268 | 0.039 | 0.298 | 0.129 |
| 120 | 2.768 | 2.757 | 2.268 | 0.043 | 0.317 | 0.130 |
| 130 | 2.793 | 2.779 | 2.268 | 0.046 | 0.334 | 0.130 |
| 140 | 2.816 | 2.799 | 2.268 | 0.049 | 0.351 | 0.131 |
| 150 | 2.829 | 2.818 | 2.268 | 0.052 | 0.367 | 0.131 |
| 160 | 2.852 | 2.836 | 2.268 | 0.055 | 0.382 | 0.131 |
| 170 | 2.858 | 2.854 | 2.268 | 0.058 | 0.396 | 0.131 |
| 180 | 2.845 | 2.870 | 2.268 | 0.061 | 0.410 | 0.131 |
| 190 | 2.889 | 2.886 | 2.268 | 0.064 | 0.422 | 0.131 |
| 200 | 2.910 | 2.900 | 2.268 | 0.067 | 0.434 | 0.131 |
| 210 | 2.905 | 2.914 | 2.268 | 0.070 | 0.445 | 0.131 |
| 220 | 2.922 | 2.928 | 2.268 | 0.072 | 0.456 | 0.131 |
| 230 | 2.925 | 2.941 | 2.268 | 0.075 | 0.466 | 0.131 |
| 240 | 2.970 | 2.953 | 2.268 | 0.078 | 0.475 | 0.131 |
| 250 | 2.950 | 2.964 | 2.268 | 0.080 | 0.484 | 0.131 |
| 260 | 2.961 | 2.975 | 2.268 | 0.083 | 0.493 | 0.131 |
| 270 | 2.956 | 2.986 | 2.268 | 0.086 | 0.501 | 0.131 |
| 280 | 2.978 | 2.996 | 2.268 | 0.088 | 0.508 | 0.131 |
| 290 | 2.964 | 3.005 | 2.268 | 0.091 | 0.515 | 0.131 |
| 300 | 2.968 | 3.014 | 2.268 | 0.093 | 0.522 | 0.131 |
| 310 | 3.012 | 3.023 | 2.268 | 0.095 | 0.528 | 0.131 |
| 320 | 3.014 | 3.031 | 2.268 | 0.098 | 0.534 | 0.131 |
| 330 | 3.019 | 3.039 | 2.268 | 0.100 | 0.540 | 0.131 |
| 340 | 3.035 | 3.047 | 2.268 | 0.102 | 0.545 | 0.131 |
| 350 | 3.029 | 3.054 | 2.268 | 0.105 | 0.550 | 0.131 |
| 360 | 3.059 | 3.061 | 2.268 | 0.107 | 0.555 | 0.131 |
| 370 | 3.066 | 3.068 | 2.268 | 0.109 | 0.559 | 0.131 |
| 380 | 3.066 | 3.074 | 2.268 | 0.111 | 0.563 | 0.131 |
| 390 | 3.069 | 3.080 | 2.268 | 0.113 | 0.567 | 0.131 |
| 400 | 3.059 | 3.086 | 2.268 | 0.115 | 0.571 | 0.131 |
| 410 | 3.081 | 3.092 | 2.268 | 0.117 | 0.575 | 0.131 |
| 420 | 3.081 | 3.097 | 2.268 | 0.119 | 0.578 | 0.131 |
| 430 | 3.099 | 3.102 | 2.268 | 0.121 | 0.581 | 0.131 |
| 440 | 3.060 | 3.107 | 2.268 | 0.123 | 0.584 | 0.131 |
| 450 | 3.099 | 3.112 | 2.268 | 0.125 | 0.587 | 0.131 |
| 460 | 3.120 | 3.116 | 2.268 | 0.127 | 0.590 | 0.131 |

|              |                       |       |       |       |       |       |       |                                      |                                     |
|--------------|-----------------------|-------|-------|-------|-------|-------|-------|--------------------------------------|-------------------------------------|
|              |                       | 470   | 3.092 | 3.121 | 2.268 | 0.129 | 0.592 | 0.131                                |                                     |
|              |                       | 480   | 3.142 | 3.125 | 2.268 | 0.131 | 0.595 | 0.131                                |                                     |
|              |                       | 490   | 3.113 | 3.129 | 2.268 | 0.133 | 0.597 | 0.131                                |                                     |
|              |                       | 500   | 3.128 | 3.133 | 2.268 | 0.134 | 0.599 | 0.131                                |                                     |
|              |                       | 510   | 3.133 | 3.137 | 2.268 | 0.136 | 0.601 | 0.131                                |                                     |
|              |                       | 520   | 3.142 | 3.140 | 2.268 | 0.138 | 0.603 | 0.131                                |                                     |
|              |                       | 530   | 3.127 | 3.144 | 2.268 | 0.140 | 0.605 | 0.131                                |                                     |
|              |                       | 540   | 3.136 | 3.147 | 2.268 | 0.141 | 0.606 | 0.131                                |                                     |
|              |                       | 550   | 3.144 | 3.150 | 2.268 | 0.143 | 0.608 | 0.131                                |                                     |
|              |                       | 560   | 3.149 | 3.153 | 2.268 | 0.145 | 0.609 | 0.131                                |                                     |
|              |                       | 570   | 3.142 | 3.156 | 2.268 | 0.146 | 0.611 | 0.131                                |                                     |
|              |                       | 580   | 3.136 | 3.159 | 2.268 | 0.148 | 0.612 | 0.131                                |                                     |
|              |                       | 590   | 3.155 | 3.162 | 2.268 | 0.149 | 0.613 | 0.131                                |                                     |
|              |                       | 600   | 3.172 | 3.165 | 2.268 | 0.151 | 0.614 | 0.131                                |                                     |
| GFET<br>#M32 | $c^{(CEA)} = 5$<br>nM | -50   | 2.250 | 2.249 | -     | -     | -     | -                                    | $\bar{c}^{(CEA)} \approx 4.2204$ nM |
|              |                       | -40   | 2.275 | 2.249 |       |       |       |                                      |                                     |
|              |                       | -30   | 2.234 | 2.249 |       |       |       |                                      |                                     |
|              |                       | -20   | 2.251 | 2.249 |       |       |       |                                      |                                     |
|              |                       | -10   | 2.243 | 2.249 |       |       |       |                                      |                                     |
|              | 0                     | 2.243 | 2.249 | 2.249 | 0.000 | 0.000 | 0.000 |                                      |                                     |
|              | 10                    | 2.420 | 2.383 | 2.249 | 0.005 | 0.035 | 0.094 |                                      |                                     |
|              | 20                    | 2.470 | 2.456 | 2.249 | 0.010 | 0.067 | 0.129 |                                      |                                     |
|              | 30                    | 2.518 | 2.504 | 2.249 | 0.015 | 0.098 | 0.142 |                                      |                                     |
|              | 40                    | 2.547 | 2.542 | 2.249 | 0.020 | 0.126 | 0.147 |                                      |                                     |
|              | 50                    | 2.597 | 2.576 | 2.249 | 0.025 | 0.153 | 0.149 |                                      |                                     |
|              | 60                    | 2.626 | 2.607 | 2.249 | 0.030 | 0.179 | 0.149 |                                      |                                     |
|              | 70                    | 2.654 | 2.635 | 2.249 | 0.034 | 0.202 | 0.149 |                                      |                                     |
|              | 80                    | 2.697 | 2.662 | 2.249 | 0.039 | 0.225 | 0.150 |                                      |                                     |
|              | 90                    | 2.708 | 2.688 | 2.249 | 0.043 | 0.246 | 0.150 |                                      |                                     |
|              | 100                   | 2.744 | 2.712 | 2.249 | 0.047 | 0.266 | 0.150 | $\bar{c}^{(AFP)} \approx 53.1332$ nM |                                     |
|              | 110                   | 2.754 | 2.735 | 2.249 | 0.052 | 0.285 | 0.150 |                                      |                                     |
|              | 120                   | 2.779 | 2.757 | 2.249 | 0.056 | 0.302 | 0.150 | $\bar{c}^{(PTH)} \approx 95.2485$ nM |                                     |
|              | 130                   | 2.777 | 2.777 | 2.249 | 0.060 | 0.319 | 0.150 |                                      |                                     |
|              | 140                   | 2.793 | 2.797 | 2.249 | 0.064 | 0.334 | 0.150 |                                      |                                     |
|              | 150                   | 2.792 | 2.816 | 2.249 | 0.068 | 0.349 | 0.150 |                                      |                                     |
|              | 160                   | 2.822 | 2.833 | 2.249 | 0.072 | 0.362 | 0.150 |                                      |                                     |
|              | 170                   | 2.865 | 2.850 | 2.249 | 0.076 | 0.375 | 0.150 |                                      |                                     |
|              | 180                   | 2.856 | 2.866 | 2.249 | 0.080 | 0.387 | 0.150 |                                      |                                     |
|              | 190                   | 2.883 | 2.881 | 2.249 | 0.083 | 0.399 | 0.150 |                                      |                                     |
|              | 200                   | 2.897 | 2.895 | 2.249 | 0.087 | 0.409 | 0.150 |                                      |                                     |
| 210          | 2.902                 | 2.909 | 2.249 | 0.091 | 0.420 | 0.150 |       |                                      |                                     |
| 220          | 2.910                 | 2.922 | 2.249 | 0.094 | 0.429 | 0.150 |       |                                      |                                     |
| 230          | 2.921                 | 2.934 | 2.249 | 0.098 | 0.438 | 0.150 |       |                                      |                                     |
| 240          | 2.927                 | 2.946 | 2.249 | 0.101 | 0.446 | 0.150 |       |                                      |                                     |
| 250          | 2.946                 | 2.957 | 2.249 | 0.104 | 0.454 | 0.150 |       |                                      |                                     |
| 260          | 2.946                 | 2.968 | 2.249 | 0.108 | 0.462 | 0.150 |       |                                      |                                     |

|              |                        |     |       |       |       |       |       |       |                                         |
|--------------|------------------------|-----|-------|-------|-------|-------|-------|-------|-----------------------------------------|
|              |                        | 270 | 3.000 | 2.978 | 2.249 | 0.111 | 0.469 | 0.150 |                                         |
|              |                        | 280 | 2.950 | 2.988 | 2.249 | 0.114 | 0.475 | 0.150 |                                         |
|              |                        | 290 | 2.984 | 2.997 | 2.249 | 0.117 | 0.481 | 0.150 |                                         |
|              |                        | 300 | 2.988 | 3.006 | 2.249 | 0.120 | 0.487 | 0.150 |                                         |
|              |                        | 310 | 3.018 | 3.014 | 2.249 | 0.123 | 0.492 | 0.150 |                                         |
|              |                        | 320 | 3.012 | 3.022 | 2.249 | 0.126 | 0.498 | 0.150 |                                         |
|              |                        | 330 | 3.046 | 3.030 | 2.249 | 0.129 | 0.502 | 0.150 |                                         |
|              |                        | 340 | 3.031 | 3.037 | 2.249 | 0.132 | 0.507 | 0.150 |                                         |
|              |                        | 350 | 3.057 | 3.044 | 2.249 | 0.135 | 0.511 | 0.150 |                                         |
|              |                        | 360 | 3.064 | 3.051 | 2.249 | 0.137 | 0.515 | 0.150 |                                         |
|              |                        | 370 | 3.037 | 3.058 | 2.249 | 0.140 | 0.519 | 0.150 |                                         |
|              |                        | 380 | 3.042 | 3.064 | 2.249 | 0.143 | 0.522 | 0.150 |                                         |
|              |                        | 390 | 3.051 | 3.070 | 2.249 | 0.145 | 0.526 | 0.150 |                                         |
|              |                        | 400 | 3.076 | 3.075 | 2.249 | 0.148 | 0.529 | 0.150 |                                         |
|              |                        | 410 | 3.089 | 3.081 | 2.249 | 0.150 | 0.532 | 0.150 |                                         |
|              |                        | 420 | 3.095 | 3.086 | 2.249 | 0.153 | 0.535 | 0.150 |                                         |
|              |                        | 430 | 3.092 | 3.091 | 2.249 | 0.155 | 0.537 | 0.150 |                                         |
|              |                        | 440 | 3.104 | 3.096 | 2.249 | 0.157 | 0.540 | 0.150 |                                         |
|              |                        | 450 | 3.101 | 3.100 | 2.249 | 0.160 | 0.542 | 0.150 |                                         |
|              |                        | 460 | 3.120 | 3.105 | 2.249 | 0.162 | 0.544 | 0.150 |                                         |
|              |                        | 470 | 3.098 | 3.109 | 2.249 | 0.164 | 0.546 | 0.150 |                                         |
|              |                        | 480 | 3.126 | 3.113 | 2.249 | 0.166 | 0.548 | 0.150 |                                         |
|              |                        | 490 | 3.113 | 3.117 | 2.249 | 0.169 | 0.550 | 0.150 |                                         |
|              |                        | 500 | 3.123 | 3.121 | 2.249 | 0.171 | 0.552 | 0.150 |                                         |
|              |                        | 510 | 3.114 | 3.125 | 2.249 | 0.173 | 0.553 | 0.150 |                                         |
|              |                        | 520 | 3.122 | 3.128 | 2.249 | 0.175 | 0.555 | 0.150 |                                         |
|              |                        | 530 | 3.148 | 3.132 | 2.249 | 0.177 | 0.556 | 0.150 |                                         |
|              |                        | 540 | 3.149 | 3.135 | 2.249 | 0.179 | 0.557 | 0.150 |                                         |
|              |                        | 550 | 3.136 | 3.138 | 2.249 | 0.181 | 0.559 | 0.150 |                                         |
|              |                        | 560 | 3.156 | 3.141 | 2.249 | 0.183 | 0.560 | 0.150 |                                         |
|              |                        | 570 | 3.153 | 3.144 | 2.249 | 0.184 | 0.561 | 0.150 |                                         |
|              |                        | 580 | 3.147 | 3.147 | 2.249 | 0.186 | 0.562 | 0.150 |                                         |
|              |                        | 590 | 3.160 | 3.150 | 2.249 | 0.188 | 0.563 | 0.150 |                                         |
|              |                        | 600 | 3.178 | 3.152 | 2.249 | 0.190 | 0.564 | 0.150 |                                         |
| GFET<br>#M33 | $c^{(CEA)} = 20$<br>nM | -50 | 2.300 | 2.277 | -     | -     | -     | -     | $\bar{c}^{(CEA)} \approx$<br>19.8776 nM |
|              |                        | -40 | 2.279 | 2.277 |       |       |       |       |                                         |
|              |                        | -30 | 2.263 | 2.277 |       |       |       |       |                                         |
|              |                        | -20 | 2.269 | 2.277 |       |       |       |       |                                         |
|              |                        | -10 | 2.275 | 2.277 |       |       |       |       |                                         |
|              | $c^{(AFP)} = 5$<br>nM  | 0   | 2.275 | 2.277 | 2.277 | 0.000 | 0.000 | 0.000 | $\bar{c}^{(AFP)} \approx$<br>6.7275 nM  |
|              |                        | 10  | 2.376 | 2.326 | 2.277 | 0.035 | 0.005 | 0.010 |                                         |
|              |                        | 20  | 2.398 | 2.372 | 2.277 | 0.067 | 0.011 | 0.018 |                                         |
|              | $c^{(PTH)} = 2$<br>nM  | 30  | 2.439 | 2.415 | 2.277 | 0.096 | 0.016 | 0.026 | $\bar{c}^{(PTH)} \approx$<br>8.0132 nM  |
|              |                        | 40  | 2.488 | 2.455 | 2.277 | 0.124 | 0.021 | 0.033 |                                         |
|              |                        | 50  | 2.493 | 2.492 | 2.277 | 0.150 | 0.027 | 0.039 |                                         |
|              |                        | 60  | 2.552 | 2.527 | 2.277 | 0.173 | 0.032 | 0.045 |                                         |

|     |       |       |       |       |       |       |
|-----|-------|-------|-------|-------|-------|-------|
| 70  | 2.568 | 2.559 | 2.277 | 0.196 | 0.037 | 0.050 |
| 80  | 2.587 | 2.589 | 2.277 | 0.216 | 0.042 | 0.055 |
| 90  | 2.613 | 2.617 | 2.277 | 0.235 | 0.047 | 0.059 |
| 100 | 2.649 | 2.644 | 2.277 | 0.253 | 0.051 | 0.063 |
| 110 | 2.669 | 2.668 | 2.277 | 0.269 | 0.056 | 0.066 |
| 120 | 2.703 | 2.691 | 2.277 | 0.285 | 0.061 | 0.069 |
| 130 | 2.729 | 2.713 | 2.277 | 0.299 | 0.065 | 0.072 |
| 140 | 2.736 | 2.733 | 2.277 | 0.312 | 0.070 | 0.074 |
| 150 | 2.752 | 2.751 | 2.277 | 0.324 | 0.074 | 0.076 |
| 160 | 2.752 | 2.769 | 2.277 | 0.336 | 0.079 | 0.078 |
| 170 | 2.792 | 2.786 | 2.277 | 0.346 | 0.083 | 0.080 |
| 180 | 2.811 | 2.801 | 2.277 | 0.356 | 0.087 | 0.082 |
| 190 | 2.790 | 2.816 | 2.277 | 0.365 | 0.091 | 0.083 |
| 200 | 2.813 | 2.830 | 2.277 | 0.374 | 0.095 | 0.084 |
| 210 | 2.838 | 2.843 | 2.277 | 0.381 | 0.099 | 0.086 |
| 220 | 2.853 | 2.855 | 2.277 | 0.389 | 0.103 | 0.087 |
| 230 | 2.848 | 2.867 | 2.277 | 0.395 | 0.107 | 0.088 |
| 240 | 2.869 | 2.878 | 2.277 | 0.402 | 0.111 | 0.088 |
| 250 | 2.897 | 2.888 | 2.277 | 0.408 | 0.115 | 0.089 |
| 260 | 2.889 | 2.898 | 2.277 | 0.413 | 0.119 | 0.090 |
| 270 | 2.921 | 2.908 | 2.277 | 0.418 | 0.122 | 0.090 |
| 280 | 2.912 | 2.916 | 2.277 | 0.423 | 0.126 | 0.091 |
| 290 | 2.888 | 2.925 | 2.277 | 0.427 | 0.129 | 0.092 |
| 300 | 2.927 | 2.933 | 2.277 | 0.431 | 0.133 | 0.092 |
| 310 | 2.912 | 2.940 | 2.277 | 0.435 | 0.136 | 0.092 |
| 320 | 2.938 | 2.948 | 2.277 | 0.438 | 0.140 | 0.093 |
| 330 | 2.959 | 2.955 | 2.277 | 0.442 | 0.143 | 0.093 |
| 340 | 2.966 | 2.961 | 2.277 | 0.445 | 0.147 | 0.093 |
| 350 | 2.985 | 2.967 | 2.277 | 0.447 | 0.150 | 0.094 |
| 360 | 2.989 | 2.973 | 2.277 | 0.450 | 0.153 | 0.094 |
| 370 | 3.001 | 2.979 | 2.277 | 0.452 | 0.156 | 0.094 |
| 380 | 2.975 | 2.985 | 2.277 | 0.455 | 0.159 | 0.094 |
| 390 | 2.984 | 2.990 | 2.277 | 0.457 | 0.162 | 0.094 |
| 400 | 2.996 | 2.995 | 2.277 | 0.459 | 0.165 | 0.095 |
| 410 | 3.004 | 3.000 | 2.277 | 0.460 | 0.168 | 0.095 |
| 420 | 3.023 | 3.005 | 2.277 | 0.462 | 0.171 | 0.095 |
| 430 | 3.014 | 3.009 | 2.277 | 0.464 | 0.174 | 0.095 |
| 440 | 3.007 | 3.014 | 2.277 | 0.465 | 0.177 | 0.095 |
| 450 | 3.032 | 3.018 | 2.277 | 0.466 | 0.180 | 0.095 |
| 460 | 3.049 | 3.022 | 2.277 | 0.468 | 0.182 | 0.095 |
| 470 | 3.011 | 3.026 | 2.277 | 0.469 | 0.185 | 0.095 |
| 480 | 3.033 | 3.030 | 2.277 | 0.470 | 0.188 | 0.095 |
| 490 | 3.046 | 3.033 | 2.277 | 0.471 | 0.190 | 0.096 |
| 500 | 3.051 | 3.037 | 2.277 | 0.472 | 0.193 | 0.096 |
| 510 | 3.054 | 3.040 | 2.277 | 0.472 | 0.196 | 0.096 |
| 520 | 3.056 | 3.044 | 2.277 | 0.473 | 0.198 | 0.096 |

|              |                                                                          |       |       |       |       |       |       |       |                                                                                                                              |
|--------------|--------------------------------------------------------------------------|-------|-------|-------|-------|-------|-------|-------|------------------------------------------------------------------------------------------------------------------------------|
|              |                                                                          | 530   | 3.042 | 3.047 | 2.277 | 0.474 | 0.200 | 0.096 |                                                                                                                              |
|              |                                                                          | 540   | 3.089 | 3.050 | 2.277 | 0.475 | 0.203 | 0.096 |                                                                                                                              |
|              |                                                                          | 550   | 3.056 | 3.053 | 2.277 | 0.475 | 0.205 | 0.096 |                                                                                                                              |
|              |                                                                          | 560   | 3.061 | 3.056 | 2.277 | 0.476 | 0.208 | 0.096 |                                                                                                                              |
|              |                                                                          | 570   | 3.069 | 3.059 | 2.277 | 0.476 | 0.210 | 0.096 |                                                                                                                              |
|              |                                                                          | 580   | 3.065 | 3.062 | 2.277 | 0.477 | 0.212 | 0.096 |                                                                                                                              |
|              |                                                                          | 590   | 3.085 | 3.064 | 2.277 | 0.477 | 0.214 | 0.096 |                                                                                                                              |
|              |                                                                          | 600   | 3.096 | 3.067 | 2.277 | 0.478 | 0.217 | 0.096 |                                                                                                                              |
| GFET<br>#M34 | $c^{(CEA)} = 20$<br>nM<br>$c^{(AFP)} = 5$<br>nM<br>$c^{(PTH)} = 5$<br>nM | -50   | 2.292 | 2.279 | -     | -     | -     | -     | $\bar{c}^{(CEA)} \approx$<br>22.0123 nM<br>$\bar{c}^{(AFP)} \approx$<br>8.4219 nM<br>$\bar{c}^{(PTH)} \approx$<br>13.0655 nM |
|              |                                                                          | -40   | 2.301 | 2.279 |       |       |       |       |                                                                                                                              |
|              |                                                                          | -30   | 2.258 | 2.279 |       |       |       |       |                                                                                                                              |
|              |                                                                          | -20   | 2.254 | 2.279 |       |       |       |       |                                                                                                                              |
|              |                                                                          | -10   | 2.284 | 2.279 |       |       |       |       |                                                                                                                              |
|              |                                                                          | 0     | 2.284 | 2.279 | 2.279 | 0.000 | 0.000 | 0.000 |                                                                                                                              |
|              |                                                                          | 10    | 2.373 | 2.337 | 2.279 | 0.037 | 0.008 | 0.014 |                                                                                                                              |
|              |                                                                          | 20    | 2.418 | 2.390 | 2.279 | 0.070 | 0.016 | 0.025 |                                                                                                                              |
|              |                                                                          | 30    | 2.486 | 2.439 | 2.279 | 0.101 | 0.023 | 0.035 |                                                                                                                              |
|              |                                                                          | 40    | 2.498 | 2.483 | 2.279 | 0.130 | 0.031 | 0.044 |                                                                                                                              |
|              |                                                                          | 50    | 2.548 | 2.524 | 2.279 | 0.156 | 0.038 | 0.051 |                                                                                                                              |
|              |                                                                          | 60    | 2.567 | 2.562 | 2.279 | 0.180 | 0.046 | 0.057 |                                                                                                                              |
|              |                                                                          | 70    | 2.608 | 2.597 | 2.279 | 0.203 | 0.053 | 0.063 |                                                                                                                              |
|              |                                                                          | 80    | 2.665 | 2.629 | 2.279 | 0.223 | 0.060 | 0.067 |                                                                                                                              |
|              |                                                                          | 90    | 2.670 | 2.659 | 2.279 | 0.243 | 0.067 | 0.071 |                                                                                                                              |
|              |                                                                          | 100   | 2.701 | 2.687 | 2.279 | 0.260 | 0.074 | 0.074 |                                                                                                                              |
|              |                                                                          | 110   | 2.724 | 2.712 | 2.279 | 0.276 | 0.080 | 0.077 |                                                                                                                              |
|              |                                                                          | 120   | 2.757 | 2.736 | 2.279 | 0.291 | 0.087 | 0.080 |                                                                                                                              |
|              |                                                                          | 130   | 2.786 | 2.759 | 2.279 | 0.305 | 0.093 | 0.082 |                                                                                                                              |
|              |                                                                          | 140   | 2.784 | 2.779 | 2.279 | 0.317 | 0.100 | 0.083 |                                                                                                                              |
|              |                                                                          | 150   | 2.799 | 2.799 | 2.279 | 0.329 | 0.106 | 0.085 |                                                                                                                              |
|              |                                                                          | 160   | 2.811 | 2.817 | 2.279 | 0.340 | 0.112 | 0.086 |                                                                                                                              |
|              |                                                                          | 170   | 2.833 | 2.834 | 2.279 | 0.350 | 0.118 | 0.087 |                                                                                                                              |
|              |                                                                          | 180   | 2.858 | 2.850 | 2.279 | 0.359 | 0.124 | 0.088 |                                                                                                                              |
|              |                                                                          | 190   | 2.864 | 2.865 | 2.279 | 0.367 | 0.130 | 0.089 |                                                                                                                              |
|              |                                                                          | 200   | 2.879 | 2.879 | 2.279 | 0.375 | 0.136 | 0.090 |                                                                                                                              |
|              |                                                                          | 210   | 2.880 | 2.893 | 2.279 | 0.382 | 0.141 | 0.090 |                                                                                                                              |
|              |                                                                          | 220   | 2.933 | 2.905 | 2.279 | 0.389 | 0.147 | 0.091 |                                                                                                                              |
|              |                                                                          | 230   | 2.914 | 2.917 | 2.279 | 0.395 | 0.152 | 0.091 |                                                                                                                              |
|              |                                                                          | 240   | 2.905 | 2.928 | 2.279 | 0.400 | 0.158 | 0.092 |                                                                                                                              |
|              |                                                                          | 250   | 2.913 | 2.939 | 2.279 | 0.405 | 0.163 | 0.092 |                                                                                                                              |
|              |                                                                          | 260   | 2.935 | 2.949 | 2.279 | 0.410 | 0.168 | 0.092 |                                                                                                                              |
| 270          | 2.995                                                                    | 2.959 | 2.279 | 0.415 | 0.173 | 0.093 |       |       |                                                                                                                              |
| 280          | 2.968                                                                    | 2.968 | 2.279 | 0.419 | 0.178 | 0.093 |       |       |                                                                                                                              |
| 290          | 2.929                                                                    | 2.977 | 2.279 | 0.422 | 0.183 | 0.093 |       |       |                                                                                                                              |
| 300          | 2.971                                                                    | 2.986 | 2.279 | 0.426 | 0.188 | 0.093 |       |       |                                                                                                                              |
| 310          | 2.987                                                                    | 2.994 | 2.279 | 0.429 | 0.193 | 0.093 |       |       |                                                                                                                              |
| 320          | 2.969                                                                    | 3.001 | 2.279 | 0.432 | 0.198 | 0.093 |       |       |                                                                                                                              |

|              |                        |       |       |       |       |       |       |       |                                         |                                         |
|--------------|------------------------|-------|-------|-------|-------|-------|-------|-------|-----------------------------------------|-----------------------------------------|
|              |                        | 330   | 2.992 | 3.009 | 2.279 | 0.434 | 0.202 | 0.093 |                                         |                                         |
|              |                        | 340   | 3.018 | 3.016 | 2.279 | 0.437 | 0.207 | 0.093 |                                         |                                         |
|              |                        | 350   | 3.009 | 3.022 | 2.279 | 0.439 | 0.211 | 0.093 |                                         |                                         |
|              |                        | 360   | 3.030 | 3.029 | 2.279 | 0.441 | 0.215 | 0.094 |                                         |                                         |
|              |                        | 370   | 3.020 | 3.035 | 2.279 | 0.443 | 0.220 | 0.094 |                                         |                                         |
|              |                        | 380   | 3.026 | 3.041 | 2.279 | 0.445 | 0.224 | 0.094 |                                         |                                         |
|              |                        | 390   | 3.037 | 3.047 | 2.279 | 0.447 | 0.228 | 0.094 |                                         |                                         |
|              |                        | 400   | 3.066 | 3.053 | 2.279 | 0.448 | 0.232 | 0.094 |                                         |                                         |
|              |                        | 410   | 3.031 | 3.058 | 2.279 | 0.450 | 0.236 | 0.094 |                                         |                                         |
|              |                        | 420   | 3.045 | 3.063 | 2.279 | 0.451 | 0.240 | 0.094 |                                         |                                         |
|              |                        | 430   | 3.043 | 3.068 | 2.279 | 0.452 | 0.244 | 0.094 |                                         |                                         |
|              |                        | 440   | 3.047 | 3.073 | 2.279 | 0.453 | 0.248 | 0.094 |                                         |                                         |
|              |                        | 450   | 3.073 | 3.078 | 2.279 | 0.454 | 0.252 | 0.094 |                                         |                                         |
|              |                        | 460   | 3.081 | 3.083 | 2.279 | 0.455 | 0.255 | 0.094 |                                         |                                         |
|              |                        | 470   | 3.047 | 3.087 | 2.279 | 0.456 | 0.259 | 0.094 |                                         |                                         |
|              |                        | 480   | 3.070 | 3.092 | 2.279 | 0.457 | 0.262 | 0.094 |                                         |                                         |
|              |                        | 490   | 3.099 | 3.096 | 2.279 | 0.457 | 0.266 | 0.094 |                                         |                                         |
|              |                        | 500   | 3.082 | 3.100 | 2.279 | 0.458 | 0.269 | 0.094 |                                         |                                         |
|              |                        | 510   | 3.092 | 3.104 | 2.279 | 0.459 | 0.273 | 0.094 |                                         |                                         |
|              |                        | 520   | 3.101 | 3.108 | 2.279 | 0.459 | 0.276 | 0.094 |                                         |                                         |
|              |                        | 530   | 3.085 | 3.112 | 2.279 | 0.460 | 0.279 | 0.094 |                                         |                                         |
|              |                        | 540   | 3.108 | 3.115 | 2.279 | 0.460 | 0.282 | 0.094 |                                         |                                         |
|              |                        | 550   | 3.095 | 3.119 | 2.279 | 0.461 | 0.286 | 0.094 |                                         |                                         |
|              |                        | 560   | 3.085 | 3.122 | 2.279 | 0.461 | 0.289 | 0.094 |                                         |                                         |
|              |                        | 570   | 3.089 | 3.126 | 2.279 | 0.462 | 0.292 | 0.094 |                                         |                                         |
|              |                        | 580   | 3.105 | 3.129 | 2.279 | 0.462 | 0.295 | 0.094 |                                         |                                         |
|              |                        | 590   | 3.129 | 3.132 | 2.279 | 0.462 | 0.298 | 0.094 |                                         |                                         |
|              |                        | 600   | 3.133 | 3.136 | 2.279 | 0.463 | 0.301 | 0.094 |                                         |                                         |
| GFET<br>#M35 | $c^{(CEA)} = 20$<br>nM | -50   | 2.274 | 2.274 | -     | -     | -     | -     | $\bar{c}^{(CEA)} \approx$<br>19.4907 nM |                                         |
|              |                        | -40   | 2.278 | 2.274 |       |       |       |       |                                         |                                         |
|              |                        | -30   | 2.274 | 2.274 |       |       |       |       |                                         |                                         |
|              |                        | -20   | 2.276 | 2.274 |       |       |       |       |                                         |                                         |
|              |                        | -10   | 2.272 | 2.274 |       |       |       |       |                                         |                                         |
|              | 0                      | 2.272 | 2.274 | 2.274 | 0.000 | 0.000 | 0.000 |       |                                         |                                         |
|              | $c^{(AFP)} = 5$<br>nM  | 10    | 2.366 | 2.351 | 2.274 | 0.035 | 0.007 | 0.036 |                                         | $\bar{c}^{(AFP)} \approx$<br>6.9123 nM  |
|              |                        | 20    | 2.466 | 2.413 | 2.274 | 0.067 | 0.013 | 0.059 |                                         |                                         |
|              |                        | 30    | 2.503 | 2.464 | 2.274 | 0.096 | 0.019 | 0.074 |                                         |                                         |
|              | $c^{(PTH)} = 20$<br>nM | 40    | 2.551 | 2.508 | 2.274 | 0.124 | 0.026 | 0.084 |                                         | $\bar{c}^{(PTH)} \approx$<br>40.8995 nM |
|              |                        | 50    | 2.559 | 2.546 | 2.274 | 0.150 | 0.032 | 0.090 |                                         |                                         |
|              |                        | 60    | 2.610 | 2.580 | 2.274 | 0.174 | 0.038 | 0.094 |                                         |                                         |
|              |                        | 70    | 2.625 | 2.611 | 2.274 | 0.196 | 0.044 | 0.096 |                                         |                                         |
|              |                        | 80    | 2.656 | 2.639 | 2.274 | 0.217 | 0.050 | 0.098 |                                         |                                         |
|              |                        | 90    | 2.666 | 2.665 | 2.274 | 0.236 | 0.056 | 0.099 |                                         |                                         |
|              |                        |       | 100   | 2.700 | 2.690 | 2.274 | 0.254 | 0.061 |                                         | 0.100                                   |
|              |                        | 110   | 2.725 | 2.712 | 2.274 | 0.271 | 0.067 | 0.100 |                                         |                                         |
|              |                        | 120   | 2.745 | 2.734 | 2.274 | 0.286 | 0.072 | 0.101 |                                         |                                         |

|     |       |       |       |       |       |       |
|-----|-------|-------|-------|-------|-------|-------|
| 130 | 2.767 | 2.754 | 2.274 | 0.301 | 0.078 | 0.101 |
| 140 | 2.788 | 2.773 | 2.274 | 0.314 | 0.083 | 0.101 |
| 150 | 2.797 | 2.791 | 2.274 | 0.327 | 0.088 | 0.101 |
| 160 | 2.815 | 2.807 | 2.274 | 0.338 | 0.094 | 0.101 |
| 170 | 2.828 | 2.823 | 2.274 | 0.349 | 0.099 | 0.101 |
| 180 | 2.852 | 2.838 | 2.274 | 0.359 | 0.104 | 0.101 |
| 190 | 2.880 | 2.853 | 2.274 | 0.369 | 0.109 | 0.101 |
| 200 | 2.876 | 2.866 | 2.274 | 0.377 | 0.114 | 0.101 |
| 210 | 2.889 | 2.879 | 2.274 | 0.385 | 0.118 | 0.101 |
| 220 | 2.903 | 2.891 | 2.274 | 0.393 | 0.123 | 0.101 |
| 230 | 2.920 | 2.903 | 2.274 | 0.400 | 0.128 | 0.101 |
| 240 | 2.934 | 2.914 | 2.274 | 0.406 | 0.132 | 0.101 |
| 250 | 2.928 | 2.925 | 2.274 | 0.412 | 0.137 | 0.101 |
| 260 | 2.944 | 2.935 | 2.274 | 0.418 | 0.141 | 0.101 |
| 270 | 2.944 | 2.944 | 2.274 | 0.423 | 0.146 | 0.101 |
| 280 | 2.955 | 2.953 | 2.274 | 0.428 | 0.150 | 0.101 |
| 290 | 2.945 | 2.962 | 2.274 | 0.433 | 0.154 | 0.101 |
| 300 | 2.970 | 2.971 | 2.274 | 0.437 | 0.158 | 0.101 |
| 310 | 2.956 | 2.979 | 2.274 | 0.441 | 0.163 | 0.101 |
| 320 | 2.965 | 2.986 | 2.274 | 0.444 | 0.167 | 0.101 |
| 330 | 2.971 | 2.994 | 2.274 | 0.448 | 0.171 | 0.101 |
| 340 | 3.010 | 3.001 | 2.274 | 0.451 | 0.174 | 0.101 |
| 350 | 2.994 | 3.007 | 2.274 | 0.454 | 0.178 | 0.101 |
| 360 | 3.017 | 3.014 | 2.274 | 0.456 | 0.182 | 0.101 |
| 370 | 2.996 | 3.020 | 2.274 | 0.459 | 0.186 | 0.101 |
| 380 | 3.023 | 3.026 | 2.274 | 0.461 | 0.190 | 0.101 |
| 390 | 3.029 | 3.032 | 2.274 | 0.463 | 0.193 | 0.101 |
| 400 | 3.024 | 3.038 | 2.274 | 0.465 | 0.197 | 0.101 |
| 410 | 3.025 | 3.043 | 2.274 | 0.467 | 0.200 | 0.101 |
| 420 | 3.041 | 3.048 | 2.274 | 0.469 | 0.204 | 0.101 |
| 430 | 3.048 | 3.053 | 2.274 | 0.471 | 0.207 | 0.101 |
| 440 | 3.078 | 3.058 | 2.274 | 0.472 | 0.210 | 0.101 |
| 450 | 3.055 | 3.063 | 2.274 | 0.474 | 0.214 | 0.101 |
| 460 | 3.077 | 3.067 | 2.274 | 0.475 | 0.217 | 0.101 |
| 470 | 3.044 | 3.072 | 2.274 | 0.476 | 0.220 | 0.101 |
| 480 | 3.088 | 3.076 | 2.274 | 0.477 | 0.223 | 0.101 |
| 490 | 3.055 | 3.080 | 2.274 | 0.478 | 0.226 | 0.101 |
| 500 | 3.090 | 3.084 | 2.274 | 0.479 | 0.230 | 0.101 |
| 510 | 3.085 | 3.088 | 2.274 | 0.480 | 0.233 | 0.101 |
| 520 | 3.067 | 3.092 | 2.274 | 0.481 | 0.235 | 0.101 |
| 530 | 3.090 | 3.096 | 2.274 | 0.482 | 0.238 | 0.101 |
| 540 | 3.080 | 3.099 | 2.274 | 0.483 | 0.241 | 0.101 |
| 550 | 3.094 | 3.103 | 2.274 | 0.483 | 0.244 | 0.101 |
| 560 | 3.085 | 3.106 | 2.274 | 0.484 | 0.247 | 0.101 |
| 570 | 3.096 | 3.110 | 2.274 | 0.485 | 0.250 | 0.101 |
| 580 | 3.105 | 3.113 | 2.274 | 0.485 | 0.252 | 0.101 |

|              |                        |       |       |       |       |       |       |       |                                            |
|--------------|------------------------|-------|-------|-------|-------|-------|-------|-------|--------------------------------------------|
|              |                        | 590   | 3.080 | 3.116 | 2.274 | 0.486 | 0.255 | 0.101 |                                            |
|              |                        | 600   | 3.113 | 3.119 | 2.274 | 0.486 | 0.258 | 0.101 |                                            |
| GFET<br>#M36 | $c^{(CEA)} = 20$<br>nM | -50   | 2.297 | 2.273 | -     | -     | -     | -     | $\tilde{c}^{(CEA)} \approx$<br>23.3255 nM  |
|              |                        | -40   | 2.250 | 2.273 |       |       |       |       |                                            |
|              |                        | -30   | 2.258 | 2.273 |       |       |       |       |                                            |
|              |                        | -20   | 2.273 | 2.273 |       |       |       |       |                                            |
|              |                        | -10   | 2.279 | 2.273 |       |       |       |       |                                            |
|              |                        | 0     | 2.279 | 2.273 |       |       |       |       |                                            |
|              |                        | 10    | 2.401 | 2.400 | 2.273 | 0.038 | 0.007 | 0.083 |                                            |
|              |                        | 20    | 2.456 | 2.466 | 2.273 | 0.072 | 0.013 | 0.108 |                                            |
|              |                        | 30    | 2.515 | 2.511 | 2.273 | 0.104 | 0.020 | 0.115 |                                            |
|              |                        | 40    | 2.569 | 2.549 | 2.273 | 0.133 | 0.026 | 0.118 |                                            |
|              |                        | 50    | 2.607 | 2.583 | 2.273 | 0.159 | 0.032 | 0.118 |                                            |
|              |                        | 60    | 2.608 | 2.613 | 2.273 | 0.184 | 0.038 | 0.119 |                                            |
|              |                        | 70    | 2.658 | 2.642 | 2.273 | 0.206 | 0.045 | 0.119 |                                            |
|              |                        | 80    | 2.670 | 2.668 | 2.273 | 0.227 | 0.051 | 0.119 |                                            |
|              |                        | 90    | 2.694 | 2.693 | 2.273 | 0.245 | 0.056 | 0.119 |                                            |
|              |                        | 100   | 2.714 | 2.716 | 2.273 | 0.263 | 0.062 | 0.119 |                                            |
|              |                        | 110   | 2.745 | 2.738 | 2.273 | 0.278 | 0.068 | 0.119 |                                            |
|              |                        | 120   | 2.732 | 2.758 | 2.273 | 0.293 | 0.074 | 0.119 |                                            |
|              |                        | 130   | 2.776 | 2.777 | 2.273 | 0.306 | 0.079 | 0.119 |                                            |
|              |                        | 140   | 2.793 | 2.794 | 2.273 | 0.319 | 0.084 | 0.119 |                                            |
|              |                        | 150   | 2.777 | 2.811 | 2.273 | 0.330 | 0.090 | 0.119 |                                            |
|              |                        | 160   | 2.826 | 2.826 | 2.273 | 0.340 | 0.095 | 0.119 |                                            |
|              |                        | 170   | 2.824 | 2.841 | 2.273 | 0.350 | 0.100 | 0.119 |                                            |
|              |                        | 180   | 2.861 | 2.855 | 2.273 | 0.358 | 0.105 | 0.119 |                                            |
|              |                        | 190   | 2.844 | 2.868 | 2.273 | 0.366 | 0.110 | 0.119 |                                            |
|              |                        | 200   | 2.860 | 2.880 | 2.273 | 0.373 | 0.115 | 0.119 |                                            |
|              |                        | 210   | 2.859 | 2.892 | 2.273 | 0.380 | 0.120 | 0.119 |                                            |
|              |                        | 220   | 2.899 | 2.902 | 2.273 | 0.386 | 0.125 | 0.119 |                                            |
|              |                        | 230   | 2.894 | 2.913 | 2.273 | 0.392 | 0.130 | 0.119 |                                            |
|              |                        | 240   | 2.937 | 2.923 | 2.273 | 0.397 | 0.134 | 0.119 |                                            |
|              |                        | 250   | 2.914 | 2.932 | 2.273 | 0.402 | 0.139 | 0.119 |                                            |
|              |                        | 260   | 2.950 | 2.941 | 2.273 | 0.406 | 0.143 | 0.119 |                                            |
|              |                        | 270   | 2.942 | 2.949 | 2.273 | 0.410 | 0.148 | 0.119 |                                            |
|              |                        | 280   | 2.953 | 2.957 | 2.273 | 0.414 | 0.152 | 0.119 |                                            |
|              |                        | 290   | 2.960 | 2.965 | 2.273 | 0.417 | 0.156 | 0.119 |                                            |
|              |                        | 300   | 2.951 | 2.972 | 2.273 | 0.420 | 0.161 | 0.119 |                                            |
|              |                        | 310   | 2.958 | 2.979 | 2.273 | 0.423 | 0.165 | 0.119 |                                            |
|              |                        | 320   | 2.965 | 2.986 | 2.273 | 0.426 | 0.169 | 0.119 |                                            |
| 330          | 2.988                  | 2.992 | 2.273 | 0.428 | 0.173 | 0.119 |       |       |                                            |
| 340          | 2.984                  | 2.998 | 2.273 | 0.430 | 0.177 | 0.119 |       |       |                                            |
| 350          | 3.000                  | 3.004 | 2.273 | 0.432 | 0.181 | 0.119 |       |       |                                            |
| 360          | 2.992                  | 3.010 | 2.273 | 0.434 | 0.185 | 0.119 |       |       |                                            |
| 370          | 2.996                  | 3.015 | 2.273 | 0.436 | 0.188 | 0.119 |       |       |                                            |
| 380          | 3.025                  | 3.021 | 2.273 | 0.437 | 0.192 | 0.119 |       |       |                                            |
|              | $c^{(AFP)} = 5$<br>nM  |       |       |       |       |       |       |       | $\tilde{c}^{(AFP)} \approx$<br>7.0654 nM   |
|              | $c^{(PTH)} = 50$<br>nM |       |       |       |       |       |       |       | $\tilde{c}^{(PTH)} \approx$<br>115.3442 nM |



|              |                        |       |       |       |       |       |       |                                           |                                           |
|--------------|------------------------|-------|-------|-------|-------|-------|-------|-------------------------------------------|-------------------------------------------|
|              |                        | 390   | 3.018 | 3.026 | 2.273 | 0.439 | 0.196 | 0.119                                     |                                           |
|              |                        | 400   | 3.014 | 3.031 | 2.273 | 0.440 | 0.199 | 0.119                                     |                                           |
|              |                        | 410   | 3.060 | 3.035 | 2.273 | 0.441 | 0.203 | 0.119                                     |                                           |
|              |                        | 420   | 3.041 | 3.040 | 2.273 | 0.442 | 0.207 | 0.119                                     |                                           |
|              |                        | 430   | 3.038 | 3.044 | 2.273 | 0.443 | 0.210 | 0.119                                     |                                           |
|              |                        | 440   | 3.029 | 3.049 | 2.273 | 0.444 | 0.213 | 0.119                                     |                                           |
|              |                        | 450   | 3.043 | 3.053 | 2.273 | 0.445 | 0.217 | 0.119                                     |                                           |
|              |                        | 460   | 3.049 | 3.057 | 2.273 | 0.446 | 0.220 | 0.119                                     |                                           |
|              |                        | 470   | 3.074 | 3.061 | 2.273 | 0.446 | 0.223 | 0.119                                     |                                           |
|              |                        | 480   | 3.077 | 3.065 | 2.273 | 0.447 | 0.226 | 0.119                                     |                                           |
|              |                        | 490   | 3.055 | 3.068 | 2.273 | 0.448 | 0.229 | 0.119                                     |                                           |
|              |                        | 500   | 3.057 | 3.072 | 2.273 | 0.448 | 0.233 | 0.119                                     |                                           |
|              |                        | 510   | 3.078 | 3.075 | 2.273 | 0.449 | 0.236 | 0.119                                     |                                           |
|              |                        | 520   | 3.060 | 3.079 | 2.273 | 0.449 | 0.239 | 0.119                                     |                                           |
|              |                        | 530   | 3.076 | 3.082 | 2.273 | 0.449 | 0.242 | 0.119                                     |                                           |
|              |                        | 540   | 3.066 | 3.086 | 2.273 | 0.450 | 0.244 | 0.119                                     |                                           |
|              |                        | 550   | 3.074 | 3.089 | 2.273 | 0.450 | 0.247 | 0.119                                     |                                           |
|              |                        | 560   | 3.076 | 3.092 | 2.273 | 0.451 | 0.250 | 0.119                                     |                                           |
|              |                        | 570   | 3.095 | 3.095 | 2.273 | 0.451 | 0.253 | 0.119                                     |                                           |
|              |                        | 580   | 3.095 | 3.098 | 2.273 | 0.451 | 0.256 | 0.119                                     |                                           |
|              |                        | 590   | 3.106 | 3.101 | 2.273 | 0.451 | 0.258 | 0.119                                     |                                           |
|              |                        | 600   | 3.097 | 3.104 | 2.273 | 0.452 | 0.261 | 0.119                                     |                                           |
| GFET<br>#M37 | $c^{(CEA)} = 20$<br>nM | -50   | 2.267 | 2.276 | -     | -     | -     | -                                         | $\tilde{c}^{(CEA)} \approx$<br>21.9772 nM |
|              |                        | -40   | 2.281 | 2.276 |       |       |       |                                           |                                           |
|              |                        | -30   | 2.270 | 2.276 |       |       |       |                                           |                                           |
|              |                        | -20   | 2.295 | 2.276 |       |       |       |                                           |                                           |
|              |                        | -10   | 2.271 | 2.276 |       |       |       |                                           |                                           |
|              | 0                      | 2.271 | 2.276 | 2.276 | 0.000 | 0.000 | 0.000 |                                           |                                           |
|              | 10                     | 2.374 | 2.335 | 2.276 | 0.035 | 0.010 | 0.014 |                                           |                                           |
|              | 20                     | 2.436 | 2.390 | 2.276 | 0.068 | 0.020 | 0.026 |                                           |                                           |
|              | 30                     | 2.479 | 2.441 | 2.276 | 0.098 | 0.030 | 0.037 |                                           |                                           |
|              | 40                     | 2.531 | 2.488 | 2.276 | 0.126 | 0.040 | 0.047 |                                           |                                           |
|              | 50                     | 2.528 | 2.531 | 2.276 | 0.151 | 0.049 | 0.056 |                                           |                                           |
|              | 60                     | 2.622 | 2.572 | 2.276 | 0.175 | 0.058 | 0.063 | $\tilde{c}^{(AFP)} \approx$<br>12.1003 nM |                                           |
|              | 70                     | 2.635 | 2.609 | 2.276 | 0.196 | 0.067 | 0.070 |                                           |                                           |
|              | 80                     | 2.655 | 2.644 | 2.276 | 0.216 | 0.076 | 0.076 | $\tilde{c}^{(PTH)} \approx$<br>8.9143 nM  |                                           |
|              | 90                     | 2.700 | 2.677 | 2.276 | 0.235 | 0.085 | 0.082 |                                           |                                           |
|              | 100                    | 2.711 | 2.707 | 2.276 | 0.252 | 0.093 | 0.087 |                                           |                                           |
|              | 110                    | 2.722 | 2.736 | 2.276 | 0.267 | 0.101 | 0.091 |                                           |                                           |
|              | 120                    | 2.774 | 2.762 | 2.276 | 0.282 | 0.109 | 0.095 |                                           |                                           |
|              | 130                    | 2.782 | 2.787 | 2.276 | 0.295 | 0.117 | 0.099 |                                           |                                           |
|              | 140                    | 2.812 | 2.810 | 2.276 | 0.307 | 0.125 | 0.102 |                                           |                                           |
| 150          | 2.812                  | 2.832 | 2.276 | 0.318 | 0.133 | 0.104 |       |                                           |                                           |
| 160          | 2.827                  | 2.852 | 2.276 | 0.329 | 0.140 | 0.107 |       |                                           |                                           |
| 170          | 2.859                  | 2.871 | 2.276 | 0.338 | 0.148 | 0.109 |       |                                           |                                           |
| 180          | 2.881                  | 2.889 | 2.276 | 0.347 | 0.155 | 0.111 |       |                                           |                                           |

|              |                        |     |       |       |       |       |       |       |                                         |
|--------------|------------------------|-----|-------|-------|-------|-------|-------|-------|-----------------------------------------|
|              |                        | 190 | 2.879 | 2.906 | 2.276 | 0.355 | 0.162 | 0.113 |                                         |
|              |                        | 200 | 2.907 | 2.922 | 2.276 | 0.363 | 0.169 | 0.114 |                                         |
|              |                        | 210 | 2.924 | 2.937 | 2.276 | 0.370 | 0.175 | 0.116 |                                         |
|              |                        | 220 | 2.916 | 2.951 | 2.276 | 0.376 | 0.182 | 0.117 |                                         |
|              |                        | 230 | 2.952 | 2.964 | 2.276 | 0.382 | 0.188 | 0.118 |                                         |
|              |                        | 240 | 2.947 | 2.977 | 2.276 | 0.388 | 0.195 | 0.119 |                                         |
|              |                        | 250 | 2.965 | 2.989 | 2.276 | 0.393 | 0.201 | 0.120 |                                         |
|              |                        | 260 | 2.994 | 3.001 | 2.276 | 0.397 | 0.207 | 0.121 |                                         |
|              |                        | 270 | 2.998 | 3.012 | 2.276 | 0.401 | 0.213 | 0.121 |                                         |
|              |                        | 280 | 2.999 | 3.022 | 2.276 | 0.405 | 0.219 | 0.122 |                                         |
|              |                        | 290 | 3.028 | 3.032 | 2.276 | 0.409 | 0.224 | 0.123 |                                         |
|              |                        | 300 | 3.016 | 3.041 | 2.276 | 0.412 | 0.230 | 0.123 |                                         |
|              |                        | 310 | 3.057 | 3.050 | 2.276 | 0.415 | 0.235 | 0.123 |                                         |
|              |                        | 320 | 3.060 | 3.059 | 2.276 | 0.418 | 0.241 | 0.124 |                                         |
|              |                        | 330 | 3.028 | 3.067 | 2.276 | 0.421 | 0.246 | 0.124 |                                         |
|              |                        | 340 | 3.079 | 3.075 | 2.276 | 0.423 | 0.251 | 0.125 |                                         |
|              |                        | 350 | 3.088 | 3.082 | 2.276 | 0.425 | 0.256 | 0.125 |                                         |
|              |                        | 360 | 3.088 | 3.089 | 2.276 | 0.427 | 0.261 | 0.125 |                                         |
|              |                        | 370 | 3.088 | 3.096 | 2.276 | 0.429 | 0.266 | 0.125 |                                         |
|              |                        | 380 | 3.088 | 3.103 | 2.276 | 0.431 | 0.271 | 0.125 |                                         |
|              |                        | 390 | 3.119 | 3.109 | 2.276 | 0.433 | 0.275 | 0.126 |                                         |
|              |                        | 400 | 3.103 | 3.116 | 2.276 | 0.434 | 0.280 | 0.126 |                                         |
|              |                        | 410 | 3.109 | 3.122 | 2.276 | 0.435 | 0.284 | 0.126 |                                         |
|              |                        | 420 | 3.150 | 3.127 | 2.276 | 0.437 | 0.289 | 0.126 |                                         |
|              |                        | 430 | 3.123 | 3.133 | 2.276 | 0.438 | 0.293 | 0.126 |                                         |
|              |                        | 440 | 3.131 | 3.138 | 2.276 | 0.439 | 0.297 | 0.126 |                                         |
|              |                        | 450 | 3.146 | 3.143 | 2.276 | 0.440 | 0.301 | 0.126 |                                         |
|              |                        | 460 | 3.152 | 3.148 | 2.276 | 0.441 | 0.305 | 0.126 |                                         |
|              |                        | 470 | 3.158 | 3.153 | 2.276 | 0.442 | 0.309 | 0.127 |                                         |
|              |                        | 480 | 3.162 | 3.158 | 2.276 | 0.442 | 0.313 | 0.127 |                                         |
|              |                        | 490 | 3.192 | 3.162 | 2.276 | 0.443 | 0.317 | 0.127 |                                         |
|              |                        | 500 | 3.178 | 3.167 | 2.276 | 0.444 | 0.320 | 0.127 |                                         |
|              |                        | 510 | 3.183 | 3.171 | 2.276 | 0.444 | 0.324 | 0.127 |                                         |
|              |                        | 520 | 3.182 | 3.175 | 2.276 | 0.445 | 0.328 | 0.127 |                                         |
|              |                        | 530 | 3.173 | 3.179 | 2.276 | 0.445 | 0.331 | 0.127 |                                         |
|              |                        | 540 | 3.191 | 3.183 | 2.276 | 0.446 | 0.334 | 0.127 |                                         |
|              |                        | 550 | 3.188 | 3.187 | 2.276 | 0.446 | 0.338 | 0.127 |                                         |
|              |                        | 560 | 3.200 | 3.190 | 2.276 | 0.447 | 0.341 | 0.127 |                                         |
|              |                        | 570 | 3.221 | 3.194 | 2.276 | 0.447 | 0.344 | 0.127 |                                         |
|              |                        | 580 | 3.222 | 3.197 | 2.276 | 0.447 | 0.347 | 0.127 |                                         |
|              |                        | 590 | 3.204 | 3.201 | 2.276 | 0.448 | 0.350 | 0.127 |                                         |
|              |                        | 600 | 3.245 | 3.204 | 2.276 | 0.448 | 0.353 | 0.127 |                                         |
| GFET<br>#M38 | $c^{(CEA)} = 20$<br>nM | -50 | 2.270 | 2.274 | -     | -     | -     | -     | $\bar{c}^{(CEA)} \approx$<br>24.1045 nM |
|              |                        | -40 | 2.263 | 2.274 |       |       |       |       |                                         |
|              | $c^{(AFP)} = 20$<br>nM | -30 | 2.271 | 2.274 |       |       |       |       |                                         |
|              |                        | -20 | 2.287 | 2.274 |       |       |       |       |                                         |

|                       |       |       |       |       |       |       |                                        |       |
|-----------------------|-------|-------|-------|-------|-------|-------|----------------------------------------|-------|
| $c^{(PTH)} = 5$<br>nM | -10   | 2.277 | 2.274 |       |       |       | $\bar{c}^{(PTH)} \approx$<br>9.0319 nM |       |
|                       | 0     | 2.277 | 2.274 | 2.274 | 0.000 | 0.000 |                                        | 0.000 |
|                       | 10    | 2.387 | 2.338 | 2.274 | 0.040 | 0.011 |                                        | 0.013 |
|                       | 20    | 2.455 | 2.397 | 2.274 | 0.077 | 0.021 |                                        | 0.024 |
|                       | 30    | 2.505 | 2.451 | 2.274 | 0.111 | 0.031 |                                        | 0.034 |
|                       | 40    | 2.523 | 2.500 | 2.274 | 0.142 | 0.041 |                                        | 0.043 |
|                       | 50    | 2.572 | 2.546 | 2.274 | 0.170 | 0.051 |                                        | 0.050 |
|                       | 60    | 2.602 | 2.589 | 2.274 | 0.196 | 0.061 |                                        | 0.057 |
|                       | 70    | 2.643 | 2.628 | 2.274 | 0.220 | 0.070 |                                        | 0.064 |
|                       | 80    | 2.669 | 2.665 | 2.274 | 0.242 | 0.079 |                                        | 0.069 |
|                       | 90    | 2.726 | 2.698 | 2.274 | 0.261 | 0.088 |                                        | 0.074 |
|                       | 100   | 2.741 | 2.730 | 2.274 | 0.280 | 0.097 |                                        | 0.079 |
|                       | 110   | 2.761 | 2.759 | 2.274 | 0.296 | 0.106 |                                        | 0.083 |
|                       | 120   | 2.773 | 2.786 | 2.274 | 0.311 | 0.114 |                                        | 0.086 |
|                       | 130   | 2.799 | 2.811 | 2.274 | 0.325 | 0.122 |                                        | 0.089 |
|                       | 140   | 2.813 | 2.834 | 2.274 | 0.338 | 0.130 |                                        | 0.092 |
|                       | 150   | 2.848 | 2.856 | 2.274 | 0.349 | 0.138 |                                        | 0.094 |
|                       | 160   | 2.865 | 2.877 | 2.274 | 0.360 | 0.146 |                                        | 0.097 |
|                       | 170   | 2.871 | 2.896 | 2.274 | 0.370 | 0.153 |                                        | 0.099 |
|                       | 180   | 2.911 | 2.914 | 2.274 | 0.379 | 0.161 |                                        | 0.100 |
|                       | 190   | 2.917 | 2.931 | 2.274 | 0.387 | 0.168 |                                        | 0.102 |
|                       | 200   | 2.910 | 2.947 | 2.274 | 0.394 | 0.175 |                                        | 0.103 |
|                       | 210   | 2.911 | 2.962 | 2.274 | 0.401 | 0.182 |                                        | 0.105 |
|                       | 220   | 2.946 | 2.976 | 2.274 | 0.407 | 0.189 |                                        | 0.106 |
|                       | 230   | 2.969 | 2.989 | 2.274 | 0.413 | 0.195 |                                        | 0.107 |
|                       | 240   | 2.984 | 3.001 | 2.274 | 0.418 | 0.202 |                                        | 0.107 |
|                       | 250   | 3.001 | 3.013 | 2.274 | 0.423 | 0.208 |                                        | 0.108 |
|                       | 260   | 3.000 | 3.025 | 2.274 | 0.427 | 0.214 |                                        | 0.109 |
|                       | 270   | 3.023 | 3.035 | 2.274 | 0.431 | 0.220 |                                        | 0.110 |
|                       | 280   | 3.022 | 3.045 | 2.274 | 0.435 | 0.226 |                                        | 0.110 |
|                       | 290   | 3.014 | 3.055 | 2.274 | 0.438 | 0.232 |                                        | 0.111 |
|                       | 300   | 3.031 | 3.064 | 2.274 | 0.441 | 0.237 |                                        | 0.111 |
|                       | 310   | 3.060 | 3.073 | 2.274 | 0.444 | 0.243 |                                        | 0.111 |
|                       | 320   | 3.080 | 3.081 | 2.274 | 0.447 | 0.248 |                                        | 0.112 |
|                       | 330   | 3.055 | 3.089 | 2.274 | 0.449 | 0.254 |                                        | 0.112 |
|                       | 340   | 3.068 | 3.096 | 2.274 | 0.451 | 0.259 |                                        | 0.112 |
|                       | 350   | 3.075 | 3.104 | 2.274 | 0.453 | 0.264 |                                        | 0.113 |
|                       | 360   | 3.097 | 3.111 | 2.274 | 0.455 | 0.269 |                                        | 0.113 |
|                       | 370   | 3.107 | 3.117 | 2.274 | 0.456 | 0.274 |                                        | 0.113 |
|                       | 380   | 3.103 | 3.124 | 2.274 | 0.458 | 0.278 |                                        | 0.113 |
|                       | 390   | 3.153 | 3.130 | 2.274 | 0.459 | 0.283 |                                        | 0.113 |
|                       | 400   | 3.132 | 3.136 | 2.274 | 0.461 | 0.287 |                                        | 0.113 |
|                       | 410   | 3.111 | 3.141 | 2.274 | 0.462 | 0.292 |                                        | 0.114 |
|                       | 420   | 3.148 | 3.147 | 2.274 | 0.463 | 0.296 |                                        | 0.114 |
| 430                   | 3.133 | 3.152 | 2.274 | 0.464 | 0.300 | 0.114 |                                        |       |
| 440                   | 3.125 | 3.157 | 2.274 | 0.465 | 0.305 | 0.114 |                                        |       |

|              |                        |       |       |       |       |       |       |                                      |                                      |
|--------------|------------------------|-------|-------|-------|-------|-------|-------|--------------------------------------|--------------------------------------|
|              |                        | 450   | 3.154 | 3.162 | 2.274 | 0.465 | 0.309 | 0.114                                |                                      |
|              |                        | 460   | 3.165 | 3.167 | 2.274 | 0.466 | 0.313 | 0.114                                |                                      |
|              |                        | 470   | 3.176 | 3.172 | 2.274 | 0.467 | 0.316 | 0.114                                |                                      |
|              |                        | 480   | 3.178 | 3.176 | 2.274 | 0.467 | 0.320 | 0.114                                |                                      |
|              |                        | 490   | 3.168 | 3.180 | 2.274 | 0.468 | 0.324 | 0.114                                |                                      |
|              |                        | 500   | 3.160 | 3.184 | 2.274 | 0.468 | 0.328 | 0.114                                |                                      |
|              |                        | 510   | 3.187 | 3.189 | 2.274 | 0.469 | 0.331 | 0.114                                |                                      |
|              |                        | 520   | 3.190 | 3.192 | 2.274 | 0.469 | 0.335 | 0.114                                |                                      |
|              |                        | 530   | 3.218 | 3.196 | 2.274 | 0.470 | 0.338 | 0.114                                |                                      |
|              |                        | 540   | 3.218 | 3.200 | 2.274 | 0.470 | 0.341 | 0.114                                |                                      |
|              |                        | 550   | 3.211 | 3.204 | 2.274 | 0.470 | 0.344 | 0.114                                |                                      |
|              |                        | 560   | 3.193 | 3.207 | 2.274 | 0.471 | 0.348 | 0.114                                |                                      |
|              |                        | 570   | 3.200 | 3.210 | 2.274 | 0.471 | 0.351 | 0.114                                |                                      |
|              |                        | 580   | 3.195 | 3.214 | 2.274 | 0.471 | 0.354 | 0.114                                |                                      |
|              |                        | 590   | 3.210 | 3.217 | 2.274 | 0.471 | 0.357 | 0.114                                |                                      |
|              |                        | 600   | 3.219 | 3.220 | 2.274 | 0.472 | 0.360 | 0.114                                |                                      |
| GFET<br>#M39 | $c^{(CEA)} = 20$<br>nM | -50   | 2.265 | 2.276 | -     | -     | -     | -                                    | $\bar{c}^{(CEA)} \approx 19.5233$ nM |
|              |                        | -40   | 2.262 | 2.276 |       |       |       |                                      |                                      |
|              |                        | -30   | 2.270 | 2.276 |       |       |       |                                      |                                      |
|              |                        | -20   | 2.282 | 2.276 |       |       |       |                                      |                                      |
|              |                        | -10   | 2.288 | 2.276 |       |       |       |                                      |                                      |
|              | 0                      | 2.288 | 2.276 | 2.276 | 0.000 | 0.000 | 0.000 |                                      |                                      |
|              | 10                     | 2.387 | 2.378 | 2.276 | 0.034 | 0.009 | 0.059 |                                      |                                      |
|              | 20                     | 2.456 | 2.451 | 2.276 | 0.065 | 0.019 | 0.091 |                                      |                                      |
|              | 30                     | 2.514 | 2.507 | 2.276 | 0.095 | 0.028 | 0.109 |                                      |                                      |
|              | 40                     | 2.543 | 2.554 | 2.276 | 0.122 | 0.036 | 0.119 |                                      |                                      |
|              | 50                     | 2.579 | 2.593 | 2.276 | 0.147 | 0.045 | 0.125 |                                      |                                      |
|              | 60                     | 2.630 | 2.628 | 2.276 | 0.171 | 0.053 | 0.128 |                                      |                                      |
|              | 70                     | 2.691 | 2.660 | 2.276 | 0.193 | 0.062 | 0.130 |                                      |                                      |
|              | 80                     | 2.677 | 2.690 | 2.276 | 0.213 | 0.070 | 0.131 |                                      |                                      |
|              | 90                     | 2.722 | 2.717 | 2.276 | 0.232 | 0.078 | 0.131 | $\bar{c}^{(AFP)} \approx 11.8965$ nM |                                      |
|              | 100                    | 2.774 | 2.743 | 2.276 | 0.250 | 0.086 | 0.132 |                                      |                                      |
|              | 110                    | 2.757 | 2.767 | 2.276 | 0.266 | 0.093 | 0.132 | $\bar{c}^{(PTH)} \approx 55.1098$ nM |                                      |
|              | 120                    | 2.804 | 2.790 | 2.276 | 0.281 | 0.101 | 0.132 |                                      |                                      |
|              | 130                    | 2.821 | 2.811 | 2.276 | 0.295 | 0.108 | 0.132 |                                      |                                      |
|              | 140                    | 2.837 | 2.832 | 2.276 | 0.309 | 0.115 | 0.132 |                                      |                                      |
|              | 150                    | 2.836 | 2.851 | 2.276 | 0.321 | 0.122 | 0.132 |                                      |                                      |
|              | 160                    | 2.850 | 2.869 | 2.276 | 0.332 | 0.129 | 0.132 |                                      |                                      |
|              | 170                    | 2.915 | 2.886 | 2.276 | 0.343 | 0.136 | 0.132 |                                      |                                      |
|              | 180                    | 2.907 | 2.903 | 2.276 | 0.353 | 0.142 | 0.132 |                                      |                                      |
| 190          | 2.910                  | 2.919 | 2.276 | 0.362 | 0.149 | 0.132 |       |                                      |                                      |
| 200          | 2.928                  | 2.933 | 2.276 | 0.370 | 0.155 | 0.132 |       |                                      |                                      |
| 210          | 2.966                  | 2.948 | 2.276 | 0.378 | 0.161 | 0.132 |       |                                      |                                      |
| 220          | 2.954                  | 2.961 | 2.276 | 0.386 | 0.168 | 0.132 |       |                                      |                                      |
| 230          | 2.958                  | 2.974 | 2.276 | 0.392 | 0.174 | 0.132 |       |                                      |                                      |
| 240          | 3.001                  | 2.986 | 2.276 | 0.399 | 0.179 | 0.132 |       |                                      |                                      |

|              |                        |       |       |       |       |       |       |       |                                             |
|--------------|------------------------|-------|-------|-------|-------|-------|-------|-------|---------------------------------------------|
|              |                        | 250   | 3.014 | 2.998 | 2.276 | 0.405 | 0.185 | 0.132 |                                             |
|              |                        | 260   | 2.988 | 3.009 | 2.276 | 0.410 | 0.191 | 0.132 |                                             |
|              |                        | 270   | 3.028 | 3.019 | 2.276 | 0.415 | 0.196 | 0.132 |                                             |
|              |                        | 280   | 2.991 | 3.029 | 2.276 | 0.420 | 0.202 | 0.132 |                                             |
|              |                        | 290   | 2.999 | 3.039 | 2.276 | 0.424 | 0.207 | 0.132 |                                             |
|              |                        | 300   | 3.068 | 3.048 | 2.276 | 0.429 | 0.212 | 0.132 |                                             |
|              |                        | 310   | 3.042 | 3.057 | 2.276 | 0.432 | 0.217 | 0.132 |                                             |
|              |                        | 320   | 3.050 | 3.066 | 2.276 | 0.436 | 0.222 | 0.132 |                                             |
|              |                        | 330   | 3.055 | 3.074 | 2.276 | 0.439 | 0.227 | 0.132 |                                             |
|              |                        | 340   | 3.085 | 3.082 | 2.276 | 0.442 | 0.232 | 0.132 |                                             |
|              |                        | 350   | 3.091 | 3.089 | 2.276 | 0.445 | 0.236 | 0.132 |                                             |
|              |                        | 360   | 3.092 | 3.096 | 2.276 | 0.448 | 0.241 | 0.132 |                                             |
|              |                        | 370   | 3.071 | 3.103 | 2.276 | 0.450 | 0.245 | 0.132 |                                             |
|              |                        | 380   | 3.117 | 3.110 | 2.276 | 0.453 | 0.250 | 0.132 |                                             |
|              |                        | 390   | 3.113 | 3.117 | 2.276 | 0.455 | 0.254 | 0.132 |                                             |
|              |                        | 400   | 3.104 | 3.123 | 2.276 | 0.457 | 0.258 | 0.132 |                                             |
|              |                        | 410   | 3.119 | 3.129 | 2.276 | 0.459 | 0.262 | 0.132 |                                             |
|              |                        | 420   | 3.131 | 3.134 | 2.276 | 0.460 | 0.266 | 0.132 |                                             |
|              |                        | 430   | 3.165 | 3.140 | 2.276 | 0.462 | 0.270 | 0.132 |                                             |
|              |                        | 440   | 3.140 | 3.145 | 2.276 | 0.463 | 0.274 | 0.132 |                                             |
|              |                        | 450   | 3.168 | 3.150 | 2.276 | 0.465 | 0.278 | 0.132 |                                             |
|              |                        | 460   | 3.188 | 3.155 | 2.276 | 0.466 | 0.282 | 0.132 |                                             |
|              |                        | 470   | 3.130 | 3.160 | 2.276 | 0.467 | 0.285 | 0.132 |                                             |
|              |                        | 480   | 3.172 | 3.165 | 2.276 | 0.468 | 0.289 | 0.132 |                                             |
|              |                        | 490   | 3.182 | 3.169 | 2.276 | 0.469 | 0.292 | 0.132 |                                             |
|              |                        | 500   | 3.194 | 3.174 | 2.276 | 0.470 | 0.296 | 0.132 |                                             |
|              |                        | 510   | 3.183 | 3.178 | 2.276 | 0.471 | 0.299 | 0.132 |                                             |
|              |                        | 520   | 3.188 | 3.182 | 2.276 | 0.472 | 0.302 | 0.132 |                                             |
|              |                        | 530   | 3.187 | 3.186 | 2.276 | 0.473 | 0.306 | 0.132 |                                             |
|              |                        | 540   | 3.175 | 3.190 | 2.276 | 0.473 | 0.309 | 0.132 |                                             |
|              |                        | 550   | 3.225 | 3.194 | 2.276 | 0.474 | 0.312 | 0.132 |                                             |
|              |                        | 560   | 3.197 | 3.197 | 2.276 | 0.475 | 0.315 | 0.132 |                                             |
|              |                        | 570   | 3.200 | 3.201 | 2.276 | 0.475 | 0.318 | 0.132 |                                             |
|              |                        | 580   | 3.220 | 3.204 | 2.276 | 0.476 | 0.321 | 0.132 |                                             |
|              |                        | 590   | 3.221 | 3.208 | 2.276 | 0.476 | 0.324 | 0.132 |                                             |
|              |                        | 600   | 3.223 | 3.211 | 2.276 | 0.477 | 0.326 | 0.132 |                                             |
| GFET<br>#M40 | $c^{(CEA)} = 20$<br>nM | -50   | 2.277 | 2.277 | -     | -     | -     | -     | $\bar{c}^{(CEA)} \approx$<br>22.8943 nM     |
|              |                        | -40   | 2.269 | 2.277 |       |       |       |       |                                             |
|              |                        | -30   | 2.275 | 2.277 |       |       |       |       |                                             |
|              |                        | -20   | 2.272 | 2.277 |       |       |       |       |                                             |
|              | $c^{(AFP)} = 20$<br>nM | -10   | 2.285 | 2.277 | 2.277 | 0.000 | 0.000 | 0.000 | $\bar{c}^{(AFP)} \approx$<br>12.8996 nM     |
|              |                        | 0     | 2.285 | 2.277 |       |       |       |       |                                             |
|              | $c^{(PTH)} = 50$<br>nM | 10    | 2.448 | 2.418 | 2.277 | 0.040 | 0.009 | 0.092 | $\bar{c}^{(PTH)} \approx$<br>105.7666<br>nM |
|              |                        | 20    | 2.491 | 2.494 | 2.277 | 0.076 | 0.019 | 0.122 |                                             |
|              |                        | 30    | 2.542 | 2.546 | 2.277 | 0.109 | 0.028 | 0.132 |                                             |
| 40           |                        | 2.591 | 2.589 | 2.277 | 0.140 | 0.036 | 0.136 |       |                                             |

|     |       |       |       |       |       |       |
|-----|-------|-------|-------|-------|-------|-------|
| 50  | 2.635 | 2.627 | 2.277 | 0.168 | 0.045 | 0.137 |
| 60  | 2.671 | 2.662 | 2.277 | 0.194 | 0.053 | 0.137 |
| 70  | 2.694 | 2.694 | 2.277 | 0.218 | 0.062 | 0.137 |
| 80  | 2.723 | 2.724 | 2.277 | 0.240 | 0.070 | 0.137 |
| 90  | 2.758 | 2.752 | 2.277 | 0.260 | 0.077 | 0.137 |
| 100 | 2.785 | 2.778 | 2.277 | 0.278 | 0.085 | 0.137 |
| 110 | 2.804 | 2.802 | 2.277 | 0.295 | 0.093 | 0.137 |
| 120 | 2.809 | 2.825 | 2.277 | 0.311 | 0.100 | 0.137 |
| 130 | 2.814 | 2.847 | 2.277 | 0.325 | 0.107 | 0.137 |
| 140 | 2.853 | 2.867 | 2.277 | 0.338 | 0.114 | 0.137 |
| 150 | 2.837 | 2.886 | 2.277 | 0.350 | 0.121 | 0.137 |
| 160 | 2.894 | 2.904 | 2.277 | 0.362 | 0.128 | 0.137 |
| 170 | 2.896 | 2.921 | 2.277 | 0.372 | 0.135 | 0.137 |
| 180 | 2.916 | 2.937 | 2.277 | 0.381 | 0.141 | 0.137 |
| 190 | 2.952 | 2.952 | 2.277 | 0.390 | 0.148 | 0.137 |
| 200 | 2.968 | 2.966 | 2.277 | 0.398 | 0.154 | 0.137 |
| 210 | 2.977 | 2.979 | 2.277 | 0.405 | 0.160 | 0.137 |
| 220 | 2.972 | 2.992 | 2.277 | 0.412 | 0.166 | 0.137 |
| 230 | 2.965 | 3.004 | 2.277 | 0.418 | 0.172 | 0.137 |
| 240 | 2.982 | 3.015 | 2.277 | 0.423 | 0.177 | 0.137 |
| 250 | 2.987 | 3.026 | 2.277 | 0.428 | 0.183 | 0.137 |
| 260 | 3.017 | 3.036 | 2.277 | 0.433 | 0.188 | 0.137 |
| 270 | 3.016 | 3.046 | 2.277 | 0.438 | 0.194 | 0.137 |
| 280 | 3.056 | 3.055 | 2.277 | 0.442 | 0.199 | 0.137 |
| 290 | 3.054 | 3.064 | 2.277 | 0.445 | 0.204 | 0.137 |
| 300 | 3.068 | 3.072 | 2.277 | 0.449 | 0.209 | 0.137 |
| 310 | 3.081 | 3.080 | 2.277 | 0.452 | 0.214 | 0.137 |
| 320 | 3.065 | 3.088 | 2.277 | 0.455 | 0.219 | 0.137 |
| 330 | 3.092 | 3.095 | 2.277 | 0.457 | 0.224 | 0.137 |
| 340 | 3.107 | 3.102 | 2.277 | 0.460 | 0.228 | 0.137 |
| 350 | 3.119 | 3.109 | 2.277 | 0.462 | 0.233 | 0.137 |
| 360 | 3.126 | 3.115 | 2.277 | 0.464 | 0.237 | 0.137 |
| 370 | 3.097 | 3.121 | 2.277 | 0.466 | 0.241 | 0.137 |
| 380 | 3.095 | 3.127 | 2.277 | 0.467 | 0.246 | 0.137 |
| 390 | 3.136 | 3.133 | 2.277 | 0.469 | 0.250 | 0.137 |
| 400 | 3.138 | 3.139 | 2.277 | 0.470 | 0.254 | 0.137 |
| 410 | 3.139 | 3.144 | 2.277 | 0.472 | 0.258 | 0.137 |
| 420 | 3.154 | 3.149 | 2.277 | 0.473 | 0.262 | 0.137 |
| 430 | 3.145 | 3.154 | 2.277 | 0.474 | 0.265 | 0.137 |
| 440 | 3.126 | 3.159 | 2.277 | 0.475 | 0.269 | 0.137 |
| 450 | 3.179 | 3.163 | 2.277 | 0.476 | 0.273 | 0.137 |
| 460 | 3.171 | 3.168 | 2.277 | 0.477 | 0.276 | 0.137 |
| 470 | 3.157 | 3.172 | 2.277 | 0.478 | 0.280 | 0.137 |
| 480 | 3.178 | 3.176 | 2.277 | 0.479 | 0.283 | 0.137 |
| 490 | 3.183 | 3.180 | 2.277 | 0.479 | 0.286 | 0.137 |
| 500 | 3.178 | 3.184 | 2.277 | 0.480 | 0.290 | 0.137 |

|              |                        |       |       |       |       |       |       |                                           |                                           |
|--------------|------------------------|-------|-------|-------|-------|-------|-------|-------------------------------------------|-------------------------------------------|
|              |                        | 510   | 3.189 | 3.188 | 2.277 | 0.480 | 0.293 | 0.137                                     |                                           |
|              |                        | 520   | 3.172 | 3.191 | 2.277 | 0.481 | 0.296 | 0.137                                     |                                           |
|              |                        | 530   | 3.193 | 3.195 | 2.277 | 0.481 | 0.299 | 0.137                                     |                                           |
|              |                        | 540   | 3.208 | 3.198 | 2.277 | 0.482 | 0.302 | 0.137                                     |                                           |
|              |                        | 550   | 3.213 | 3.202 | 2.277 | 0.482 | 0.305 | 0.137                                     |                                           |
|              |                        | 560   | 3.219 | 3.205 | 2.277 | 0.483 | 0.308 | 0.137                                     |                                           |
|              |                        | 570   | 3.208 | 3.208 | 2.277 | 0.483 | 0.311 | 0.137                                     |                                           |
|              |                        | 580   | 3.200 | 3.211 | 2.277 | 0.483 | 0.313 | 0.137                                     |                                           |
|              |                        | 590   | 3.228 | 3.214 | 2.277 | 0.484 | 0.316 | 0.137                                     |                                           |
|              |                        | 600   | 3.229 | 3.217 | 2.277 | 0.484 | 0.319 | 0.137                                     |                                           |
| GFET<br>#M41 | $c^{(CEA)} = 20$<br>nM | -50   | 2.285 | 2.268 | -     | -     | -     | -                                         | $\tilde{c}^{(CEA)} \approx$<br>18.8795 nM |
|              |                        | -40   | 2.259 | 2.268 |       |       |       |                                           |                                           |
|              |                        | -30   | 2.257 | 2.268 |       |       |       |                                           |                                           |
|              |                        | -20   | 2.264 | 2.268 |       |       |       |                                           |                                           |
|              |                        | -10   | 2.273 | 2.268 |       |       |       |                                           |                                           |
|              | 0                      | 2.273 | 2.268 | 2.268 | 0.000 | 0.000 | 0.000 |                                           |                                           |
|              |                        | 10    | 2.400 | 2.335 | 2.268 | 0.028 | 0.020 | 0.018                                     |                                           |
|              |                        | 20    | 2.473 | 2.396 | 2.268 | 0.055 | 0.039 | 0.033                                     |                                           |
|              |                        | 30    | 2.550 | 2.452 | 2.268 | 0.080 | 0.058 | 0.046                                     |                                           |
|              |                        | 40    | 2.585 | 2.505 | 2.268 | 0.102 | 0.076 | 0.057                                     |                                           |
|              |                        | 50    | 2.630 | 2.553 | 2.268 | 0.124 | 0.094 | 0.067                                     |                                           |
|              |                        | 60    | 2.659 | 2.599 | 2.268 | 0.144 | 0.111 | 0.076                                     |                                           |
|              |                        | 70    | 2.679 | 2.641 | 2.268 | 0.162 | 0.127 | 0.083                                     |                                           |
|              |                        | 80    | 2.706 | 2.680 | 2.268 | 0.180 | 0.143 | 0.089                                     |                                           |
|              |                        | 90    | 2.747 | 2.717 | 2.268 | 0.196 | 0.158 | 0.094                                     |                                           |
|              |                        | 100   | 2.794 | 2.751 | 2.268 | 0.211 | 0.173 | 0.099                                     |                                           |
|              |                        | 110   | 2.807 | 2.783 | 2.268 | 0.225 | 0.187 | 0.103                                     |                                           |
|              |                        | 120   | 2.828 | 2.813 | 2.268 | 0.238 | 0.201 | 0.106                                     |                                           |
|              |                        | 130   | 2.865 | 2.842 | 2.268 | 0.250 | 0.214 | 0.109                                     |                                           |
|              |                        | 140   | 2.898 | 2.868 | 2.268 | 0.262 | 0.227 | 0.112                                     |                                           |
|              |                        | 150   | 2.890 | 2.893 | 2.268 | 0.272 | 0.239 | 0.114                                     |                                           |
|              |                        | 160   | 2.932 | 2.917 | 2.268 | 0.282 | 0.251 | 0.116                                     |                                           |
|              |                        | 170   | 2.945 | 2.939 | 2.268 | 0.291 | 0.262 | 0.117                                     |                                           |
|              |                        | 180   | 2.972 | 2.960 | 2.268 | 0.300 | 0.274 | 0.119                                     |                                           |
|              |                        | 190   | 2.984 | 2.980 | 2.268 | 0.308 | 0.284 | 0.120                                     |                                           |
|              |                        | 200   | 3.024 | 2.999 | 2.268 | 0.315 | 0.295 | 0.121                                     |                                           |
|              |                        | 210   | 3.035 | 3.017 | 2.268 | 0.322 | 0.305 | 0.122                                     |                                           |
|              |                        | 220   | 3.054 | 3.034 | 2.268 | 0.329 | 0.314 | 0.122                                     |                                           |
|              |                        | 230   | 3.058 | 3.050 | 2.268 | 0.335 | 0.324 | 0.123                                     |                                           |
|              |                        | 240   | 3.046 | 3.065 | 2.268 | 0.340 | 0.333 | 0.124                                     |                                           |
|              | 250                    | 3.085 | 3.079 | 2.268 | 0.346 | 0.341 | 0.124 |                                           |                                           |
|              | 260                    | 3.121 | 3.093 | 2.268 | 0.350 | 0.350 | 0.124 |                                           |                                           |
|              | 270                    | 3.113 | 3.106 | 2.268 | 0.355 | 0.358 | 0.125 |                                           |                                           |
|              | 280                    | 3.136 | 3.119 | 2.268 | 0.359 | 0.366 | 0.125 |                                           |                                           |
|              | 290                    | 3.097 | 3.130 | 2.268 | 0.363 | 0.373 | 0.125 |                                           |                                           |
|              | 300                    | 3.131 | 3.142 | 2.268 | 0.367 | 0.381 | 0.126 |                                           |                                           |
|              |                        |       |       |       |       |       |       | $\tilde{c}^{(AFP)} \approx$<br>26.1347 nM |                                           |
|              |                        |       |       |       |       |       |       | $\tilde{c}^{(PTH)} \approx$<br>12.4358 nM |                                           |

|              |                        |       |       |       |       |       |       |       |                                           |
|--------------|------------------------|-------|-------|-------|-------|-------|-------|-------|-------------------------------------------|
|              |                        | 310   | 3.165 | 3.152 | 2.268 | 0.370 | 0.388 | 0.126 |                                           |
|              |                        | 320   | 3.148 | 3.163 | 2.268 | 0.374 | 0.395 | 0.126 |                                           |
|              |                        | 330   | 3.157 | 3.172 | 2.268 | 0.376 | 0.401 | 0.126 |                                           |
|              |                        | 340   | 3.164 | 3.182 | 2.268 | 0.379 | 0.408 | 0.126 |                                           |
|              |                        | 350   | 3.190 | 3.190 | 2.268 | 0.382 | 0.414 | 0.126 |                                           |
|              |                        | 360   | 3.208 | 3.199 | 2.268 | 0.384 | 0.420 | 0.126 |                                           |
|              |                        | 370   | 3.207 | 3.207 | 2.268 | 0.387 | 0.426 | 0.126 |                                           |
|              |                        | 380   | 3.201 | 3.215 | 2.268 | 0.389 | 0.431 | 0.127 |                                           |
|              |                        | 390   | 3.178 | 3.222 | 2.268 | 0.391 | 0.437 | 0.127 |                                           |
|              |                        | 400   | 3.227 | 3.229 | 2.268 | 0.392 | 0.442 | 0.127 |                                           |
|              |                        | 410   | 3.212 | 3.236 | 2.268 | 0.394 | 0.447 | 0.127 |                                           |
|              |                        | 420   | 3.230 | 3.242 | 2.268 | 0.396 | 0.452 | 0.127 |                                           |
|              |                        | 430   | 3.240 | 3.248 | 2.268 | 0.397 | 0.456 | 0.127 |                                           |
|              |                        | 440   | 3.271 | 3.254 | 2.268 | 0.398 | 0.461 | 0.127 |                                           |
|              |                        | 450   | 3.264 | 3.260 | 2.268 | 0.400 | 0.465 | 0.127 |                                           |
|              |                        | 460   | 3.277 | 3.265 | 2.268 | 0.401 | 0.469 | 0.127 |                                           |
|              |                        | 470   | 3.292 | 3.271 | 2.268 | 0.402 | 0.473 | 0.127 |                                           |
|              |                        | 480   | 3.288 | 3.276 | 2.268 | 0.403 | 0.477 | 0.127 |                                           |
|              |                        | 490   | 3.292 | 3.280 | 2.268 | 0.404 | 0.481 | 0.127 |                                           |
|              |                        | 500   | 3.270 | 3.285 | 2.268 | 0.405 | 0.485 | 0.127 |                                           |
|              |                        | 510   | 3.300 | 3.289 | 2.268 | 0.406 | 0.488 | 0.127 |                                           |
|              |                        | 520   | 3.299 | 3.294 | 2.268 | 0.407 | 0.492 | 0.127 |                                           |
|              |                        | 530   | 3.288 | 3.298 | 2.268 | 0.407 | 0.495 | 0.127 |                                           |
|              |                        | 540   | 3.318 | 3.301 | 2.268 | 0.408 | 0.498 | 0.127 |                                           |
|              |                        | 550   | 3.316 | 3.305 | 2.268 | 0.409 | 0.501 | 0.127 |                                           |
|              |                        | 560   | 3.306 | 3.309 | 2.268 | 0.409 | 0.504 | 0.127 |                                           |
|              |                        | 570   | 3.302 | 3.312 | 2.268 | 0.410 | 0.507 | 0.127 |                                           |
|              |                        | 580   | 3.344 | 3.315 | 2.268 | 0.410 | 0.510 | 0.127 |                                           |
|              |                        | 590   | 3.326 | 3.319 | 2.268 | 0.411 | 0.513 | 0.127 |                                           |
|              |                        | 600   | 3.320 | 3.322 | 2.268 | 0.411 | 0.515 | 0.127 |                                           |
| GFET<br>#M42 | $c^{(CEA)} = 20$<br>nM | -50   | 2.275 | 2.286 | -     | -     | -     | -     | $\tilde{c}^{(CEA)} \approx$<br>23.5128 nM |
|              |                        | -40   | 2.266 | 2.286 |       |       |       |       |                                           |
|              |                        | -30   | 2.298 | 2.286 |       |       |       |       |                                           |
|              |                        | -20   | 2.291 | 2.286 |       |       |       |       |                                           |
|              |                        | -10   | 2.294 | 2.286 |       |       |       |       |                                           |
|              | 0                      | 2.294 | 2.286 | 2.286 | 0.000 | 0.000 | 0.000 |       |                                           |
|              | $c^{(AFP)} = 50$<br>nM | 10    | 2.415 | 2.359 | 2.286 | 0.038 | 0.018 | 0.017 | $\tilde{c}^{(AFP)} \approx$<br>25.1764 nM |
|              |                        | 20    | 2.459 | 2.426 | 2.286 | 0.073 | 0.036 | 0.032 |                                           |
|              |                        | 30    | 2.550 | 2.488 | 2.286 | 0.105 | 0.053 | 0.044 |                                           |
|              | $c^{(PTH)} = 5$<br>nM  | 40    | 2.600 | 2.544 | 2.286 | 0.134 | 0.069 | 0.055 | $\tilde{c}^{(PTH)} \approx$<br>12.8964 nM |
|              |                        | 50    | 2.635 | 2.596 | 2.286 | 0.161 | 0.085 | 0.064 |                                           |
|              |                        | 60    | 2.668 | 2.644 | 2.286 | 0.185 | 0.100 | 0.072 |                                           |
|              |                        | 70    | 2.694 | 2.688 | 2.286 | 0.208 | 0.115 | 0.079 |                                           |
|              |                        | 80    | 2.729 | 2.729 | 2.286 | 0.228 | 0.129 | 0.085 |                                           |
| 90           |                        | 2.772 | 2.766 | 2.286 | 0.247 | 0.143 | 0.089 |       |                                           |
|              |                        | 100   | 2.791 | 2.801 | 2.286 | 0.265 | 0.157 | 0.094 |                                           |



|     |       |       |       |       |       |       |
|-----|-------|-------|-------|-------|-------|-------|
| 110 | 2.818 | 2.834 | 2.286 | 0.281 | 0.170 | 0.097 |
| 120 | 2.842 | 2.864 | 2.286 | 0.295 | 0.182 | 0.100 |
| 130 | 2.900 | 2.892 | 2.286 | 0.309 | 0.194 | 0.103 |
| 140 | 2.906 | 2.918 | 2.286 | 0.321 | 0.206 | 0.105 |
| 150 | 2.923 | 2.943 | 2.286 | 0.332 | 0.217 | 0.107 |
| 160 | 2.920 | 2.966 | 2.286 | 0.342 | 0.228 | 0.109 |
| 170 | 2.956 | 2.987 | 2.286 | 0.352 | 0.239 | 0.110 |
| 180 | 2.971 | 3.007 | 2.286 | 0.360 | 0.249 | 0.112 |
| 190 | 2.976 | 3.026 | 2.286 | 0.368 | 0.259 | 0.113 |
| 200 | 3.011 | 3.044 | 2.286 | 0.376 | 0.268 | 0.114 |
| 210 | 3.033 | 3.061 | 2.286 | 0.382 | 0.278 | 0.114 |
| 220 | 3.016 | 3.076 | 2.286 | 0.388 | 0.287 | 0.115 |
| 230 | 3.069 | 3.091 | 2.286 | 0.394 | 0.295 | 0.116 |
| 240 | 3.061 | 3.105 | 2.286 | 0.399 | 0.304 | 0.116 |
| 250 | 3.085 | 3.118 | 2.286 | 0.404 | 0.312 | 0.116 |
| 260 | 3.118 | 3.131 | 2.286 | 0.408 | 0.320 | 0.117 |
| 270 | 3.109 | 3.142 | 2.286 | 0.412 | 0.327 | 0.117 |
| 280 | 3.122 | 3.154 | 2.286 | 0.416 | 0.334 | 0.117 |
| 290 | 3.127 | 3.164 | 2.286 | 0.419 | 0.341 | 0.118 |
| 300 | 3.170 | 3.174 | 2.286 | 0.422 | 0.348 | 0.118 |
| 310 | 3.149 | 3.184 | 2.286 | 0.425 | 0.355 | 0.118 |
| 320 | 3.163 | 3.193 | 2.286 | 0.427 | 0.361 | 0.118 |
| 330 | 3.172 | 3.201 | 2.286 | 0.430 | 0.367 | 0.118 |
| 340 | 3.195 | 3.210 | 2.286 | 0.432 | 0.373 | 0.118 |
| 350 | 3.204 | 3.217 | 2.286 | 0.434 | 0.379 | 0.118 |
| 360 | 3.209 | 3.225 | 2.286 | 0.436 | 0.385 | 0.118 |
| 370 | 3.210 | 3.232 | 2.286 | 0.437 | 0.390 | 0.118 |
| 380 | 3.236 | 3.239 | 2.286 | 0.439 | 0.395 | 0.119 |
| 390 | 3.229 | 3.245 | 2.286 | 0.440 | 0.400 | 0.119 |
| 400 | 3.238 | 3.251 | 2.286 | 0.442 | 0.405 | 0.119 |
| 410 | 3.241 | 3.257 | 2.286 | 0.443 | 0.410 | 0.119 |
| 420 | 3.263 | 3.263 | 2.286 | 0.444 | 0.414 | 0.119 |
| 430 | 3.256 | 3.268 | 2.286 | 0.445 | 0.419 | 0.119 |
| 440 | 3.267 | 3.274 | 2.286 | 0.446 | 0.423 | 0.119 |
| 450 | 3.237 | 3.279 | 2.286 | 0.447 | 0.427 | 0.119 |
| 460 | 3.240 | 3.283 | 2.286 | 0.447 | 0.431 | 0.119 |
| 470 | 3.296 | 3.288 | 2.286 | 0.448 | 0.435 | 0.119 |
| 480 | 3.302 | 3.292 | 2.286 | 0.449 | 0.439 | 0.119 |
| 490 | 3.270 | 3.296 | 2.286 | 0.449 | 0.442 | 0.119 |
| 500 | 3.278 | 3.300 | 2.286 | 0.450 | 0.446 | 0.119 |
| 510 | 3.283 | 3.304 | 2.286 | 0.450 | 0.449 | 0.119 |
| 520 | 3.320 | 3.308 | 2.286 | 0.451 | 0.452 | 0.119 |
| 530 | 3.298 | 3.311 | 2.286 | 0.451 | 0.455 | 0.119 |
| 540 | 3.332 | 3.315 | 2.286 | 0.451 | 0.458 | 0.119 |
| 550 | 3.316 | 3.318 | 2.286 | 0.452 | 0.461 | 0.119 |
| 560 | 3.307 | 3.321 | 2.286 | 0.452 | 0.464 | 0.119 |

|              |                        |       |       |       |       |       |       |       |                                      |
|--------------|------------------------|-------|-------|-------|-------|-------|-------|-------|--------------------------------------|
|              |                        | 570   | 3.302 | 3.324 | 2.286 | 0.452 | 0.467 | 0.119 |                                      |
|              |                        | 580   | 3.349 | 3.327 | 2.286 | 0.453 | 0.470 | 0.119 |                                      |
|              |                        | 590   | 3.356 | 3.330 | 2.286 | 0.453 | 0.472 | 0.119 |                                      |
|              |                        | 600   | 3.348 | 3.333 | 2.286 | 0.453 | 0.475 | 0.119 |                                      |
| GFET<br>#M43 | $c^{(CEA)} = 20$<br>nM | -50   | 2.284 | 2.277 | -     | -     | -     | -     | $\bar{c}^{(CEA)} \approx 19.2065$ nM |
|              |                        | -40   | 2.259 | 2.277 |       |       |       |       |                                      |
|              |                        | -30   | 2.288 | 2.277 |       |       |       |       |                                      |
|              |                        | -20   | 2.276 | 2.277 |       |       |       |       |                                      |
|              |                        | -10   | 2.278 | 2.277 |       |       |       |       |                                      |
|              |                        | 0     | 2.278 | 2.277 | 2.277 | 0.000 | 0.000 | 0.000 |                                      |
|              |                        | 10    | 2.426 | 2.389 | 2.277 | 0.027 | 0.023 | 0.062 |                                      |
|              |                        | 20    | 2.498 | 2.471 | 2.277 | 0.052 | 0.045 | 0.096 |                                      |
|              |                        | 30    | 2.571 | 2.534 | 2.277 | 0.076 | 0.066 | 0.115 |                                      |
|              |                        | 40    | 2.614 | 2.587 | 2.277 | 0.098 | 0.087 | 0.125 |                                      |
|              |                        | 50    | 2.675 | 2.633 | 2.277 | 0.118 | 0.106 | 0.131 |                                      |
|              |                        | 60    | 2.723 | 2.674 | 2.277 | 0.137 | 0.125 | 0.134 |                                      |
|              |                        | 70    | 2.727 | 2.711 | 2.277 | 0.154 | 0.143 | 0.136 |                                      |
|              |                        | 80    | 2.764 | 2.746 | 2.277 | 0.171 | 0.161 | 0.137 |                                      |
|              |                        | 90    | 2.795 | 2.779 | 2.277 | 0.186 | 0.178 | 0.137 |                                      |
|              |                        | 100   | 2.831 | 2.810 | 2.277 | 0.200 | 0.194 | 0.138 |                                      |
|              |                        | 110   | 2.863 | 2.839 | 2.277 | 0.214 | 0.210 | 0.138 |                                      |
|              |                        | 120   | 2.876 | 2.866 | 2.277 | 0.226 | 0.225 | 0.138 |                                      |
|              |                        | 130   | 2.903 | 2.892 | 2.277 | 0.237 | 0.240 | 0.138 |                                      |
|              |                        | 140   | 2.916 | 2.917 | 2.277 | 0.248 | 0.254 | 0.138 |                                      |
|              |                        | 150   | 2.946 | 2.940 | 2.277 | 0.258 | 0.267 | 0.138 |                                      |
|              |                        | 160   | 2.975 | 2.963 | 2.277 | 0.267 | 0.280 | 0.138 |                                      |
|              |                        | 170   | 2.977 | 2.984 | 2.277 | 0.276 | 0.293 | 0.138 |                                      |
|              |                        | 180   | 2.993 | 3.004 | 2.277 | 0.284 | 0.305 | 0.138 |                                      |
|              |                        | 190   | 3.043 | 3.023 | 2.277 | 0.291 | 0.316 | 0.138 |                                      |
|              |                        | 200   | 3.045 | 3.041 | 2.277 | 0.298 | 0.327 | 0.138 |                                      |
|              |                        | 210   | 3.058 | 3.058 | 2.277 | 0.305 | 0.338 | 0.138 |                                      |
|              |                        | 220   | 3.088 | 3.075 | 2.277 | 0.311 | 0.349 | 0.138 |                                      |
|              |                        | 230   | 3.059 | 3.090 | 2.277 | 0.316 | 0.359 | 0.138 |                                      |
|              |                        | 240   | 3.088 | 3.105 | 2.277 | 0.322 | 0.368 | 0.138 |                                      |
|              |                        | 250   | 3.093 | 3.119 | 2.277 | 0.326 | 0.377 | 0.138 |                                      |
|              |                        | 260   | 3.131 | 3.133 | 2.277 | 0.331 | 0.386 | 0.138 |                                      |
|              |                        | 270   | 3.136 | 3.145 | 2.277 | 0.335 | 0.395 | 0.138 |                                      |
|              |                        | 280   | 3.138 | 3.158 | 2.277 | 0.339 | 0.403 | 0.138 |                                      |
|              |                        | 290   | 3.144 | 3.169 | 2.277 | 0.343 | 0.411 | 0.138 |                                      |
|              |                        | 300   | 3.150 | 3.180 | 2.277 | 0.346 | 0.419 | 0.138 |                                      |
| 310          | 3.195                  | 3.191 | 2.277 | 0.349 | 0.426 | 0.138 |       |       |                                      |
| 320          | 3.166                  | 3.201 | 2.277 | 0.352 | 0.433 | 0.138 |       |       |                                      |
| 330          | 3.192                  | 3.210 | 2.277 | 0.355 | 0.440 | 0.138 |       |       |                                      |
| 340          | 3.168                  | 3.219 | 2.277 | 0.357 | 0.447 | 0.138 |       |       |                                      |
| 350          | 3.229                  | 3.228 | 2.277 | 0.360 | 0.453 | 0.138 |       |       |                                      |
| 360          | 3.227                  | 3.236 | 2.277 | 0.362 | 0.459 | 0.138 |       |       |                                      |
|              | $c^{(AFP)} = 50$<br>nM |       |       |       |       |       |       |       | $\bar{c}^{(AFP)} \approx 29.1665$ nM |
|              | $c^{(PTH)} = 20$<br>nM |       |       |       |       |       |       |       | $\bar{c}^{(PTH)} \approx 56.3245$ nM |

|              |                        |       |       |       |       |       |       |                                            |                                           |
|--------------|------------------------|-------|-------|-------|-------|-------|-------|--------------------------------------------|-------------------------------------------|
|              |                        | 370   | 3.220 | 3.244 | 2.277 | 0.364 | 0.465 | 0.138                                      |                                           |
|              |                        | 380   | 3.230 | 3.252 | 2.277 | 0.366 | 0.471 | 0.138                                      |                                           |
|              |                        | 390   | 3.229 | 3.259 | 2.277 | 0.368 | 0.476 | 0.138                                      |                                           |
|              |                        | 400   | 3.270 | 3.266 | 2.277 | 0.369 | 0.481 | 0.138                                      |                                           |
|              |                        | 410   | 3.249 | 3.273 | 2.277 | 0.371 | 0.486 | 0.138                                      |                                           |
|              |                        | 420   | 3.273 | 3.279 | 2.277 | 0.372 | 0.491 | 0.138                                      |                                           |
|              |                        | 430   | 3.281 | 3.285 | 2.277 | 0.374 | 0.496 | 0.138                                      |                                           |
|              |                        | 440   | 3.273 | 3.291 | 2.277 | 0.375 | 0.500 | 0.138                                      |                                           |
|              |                        | 450   | 3.274 | 3.296 | 2.277 | 0.376 | 0.505 | 0.138                                      |                                           |
|              |                        | 460   | 3.285 | 3.302 | 2.277 | 0.377 | 0.509 | 0.138                                      |                                           |
|              |                        | 470   | 3.285 | 3.307 | 2.277 | 0.378 | 0.513 | 0.138                                      |                                           |
|              |                        | 480   | 3.292 | 3.311 | 2.277 | 0.379 | 0.517 | 0.138                                      |                                           |
|              |                        | 490   | 3.311 | 3.316 | 2.277 | 0.380 | 0.521 | 0.138                                      |                                           |
|              |                        | 500   | 3.319 | 3.320 | 2.277 | 0.381 | 0.524 | 0.138                                      |                                           |
|              |                        | 510   | 3.318 | 3.325 | 2.277 | 0.382 | 0.528 | 0.138                                      |                                           |
|              |                        | 520   | 3.323 | 3.329 | 2.277 | 0.382 | 0.531 | 0.138                                      |                                           |
|              |                        | 530   | 3.319 | 3.333 | 2.277 | 0.383 | 0.534 | 0.138                                      |                                           |
|              |                        | 540   | 3.335 | 3.336 | 2.277 | 0.384 | 0.537 | 0.138                                      |                                           |
|              |                        | 550   | 3.312 | 3.340 | 2.277 | 0.384 | 0.540 | 0.138                                      |                                           |
|              |                        | 560   | 3.337 | 3.343 | 2.277 | 0.385 | 0.543 | 0.138                                      |                                           |
|              |                        | 570   | 3.338 | 3.346 | 2.277 | 0.385 | 0.546 | 0.138                                      |                                           |
|              |                        | 580   | 3.328 | 3.350 | 2.277 | 0.386 | 0.549 | 0.138                                      |                                           |
|              |                        | 590   | 3.338 | 3.353 | 2.277 | 0.386 | 0.551 | 0.138                                      |                                           |
|              |                        | 600   | 3.345 | 3.355 | 2.277 | 0.386 | 0.554 | 0.138                                      |                                           |
| GFET<br>#M44 | $c^{(CEA)} = 20$<br>nM | -50   | 2.257 | 2.263 | -     | -     | -     | -                                          | $\tilde{c}^{(CEA)} \approx$<br>20.8214 nM |
|              |                        | -40   | 2.282 | 2.263 |       |       |       |                                            |                                           |
|              |                        | -30   | 2.252 | 2.263 |       |       |       |                                            |                                           |
|              |                        | -20   | 2.246 | 2.263 |       |       |       |                                            |                                           |
|              |                        | -10   | 2.270 | 2.263 |       |       |       |                                            |                                           |
|              | 0                      | 2.270 | 2.263 | 2.263 | 0.000 | 0.000 | 0.000 |                                            |                                           |
|              | 10                     | 2.460 | 2.400 | 2.263 | 0.034 | 0.021 | 0.082 |                                            |                                           |
|              | 20                     | 2.525 | 2.479 | 2.263 | 0.065 | 0.041 | 0.110 |                                            |                                           |
|              | 30                     | 2.576 | 2.537 | 2.263 | 0.094 | 0.060 | 0.120 |                                            |                                           |
|              | 40                     | 2.629 | 2.586 | 2.263 | 0.121 | 0.078 | 0.123 |                                            |                                           |
|              | 50                     | 2.674 | 2.629 | 2.263 | 0.146 | 0.096 | 0.125 |                                            |                                           |
|              | 60                     | 2.696 | 2.670 | 2.263 | 0.168 | 0.114 | 0.125 |                                            |                                           |
|              | 70                     | 2.769 | 2.708 | 2.263 | 0.190 | 0.130 | 0.125 |                                            |                                           |
|              | 80                     | 2.759 | 2.744 | 2.263 | 0.209 | 0.146 | 0.125 |                                            |                                           |
|              | 90                     | 2.827 | 2.777 | 2.263 | 0.228 | 0.162 | 0.125 |                                            |                                           |
|              | 100                    | 2.842 | 2.809 | 2.263 | 0.244 | 0.177 | 0.125 |                                            |                                           |
|              | 110                    | 2.849 | 2.839 | 2.263 | 0.260 | 0.191 | 0.125 |                                            |                                           |
|              | 120                    | 2.872 | 2.868 | 2.263 | 0.274 | 0.205 | 0.125 |                                            |                                           |
|              | 130                    | 2.906 | 2.894 | 2.263 | 0.288 | 0.218 | 0.125 |                                            |                                           |
|              | 140                    | 2.938 | 2.920 | 2.263 | 0.300 | 0.231 | 0.125 |                                            |                                           |
| 150          | 2.938                  | 2.944 | 2.263 | 0.311 | 0.244 | 0.125 |       |                                            |                                           |
| 160          | 2.942                  | 2.966 | 2.263 | 0.322 | 0.256 | 0.125 |       |                                            |                                           |
|              | $c^{(AFP)} = 50$<br>nM |       |       |       |       |       |       | $\tilde{c}^{(AFP)} \approx$<br>27.3224 nM  |                                           |
|              | $c^{(PTH)} = 50$<br>nM |       |       |       |       |       |       | $\tilde{c}^{(PTH)} \approx$<br>102.4368 nM |                                           |

|              |                        |     |       |       |       |       |       |       |                                         |
|--------------|------------------------|-----|-------|-------|-------|-------|-------|-------|-----------------------------------------|
|              |                        | 170 | 2.983 | 2.988 | 2.263 | 0.332 | 0.268 | 0.125 |                                         |
|              |                        | 180 | 2.995 | 3.008 | 2.263 | 0.341 | 0.279 | 0.125 |                                         |
|              |                        | 190 | 3.029 | 3.027 | 2.263 | 0.349 | 0.290 | 0.125 |                                         |
|              |                        | 200 | 3.035 | 3.045 | 2.263 | 0.357 | 0.300 | 0.125 |                                         |
|              |                        | 210 | 3.059 | 3.063 | 2.263 | 0.364 | 0.310 | 0.125 |                                         |
|              |                        | 220 | 3.054 | 3.079 | 2.263 | 0.371 | 0.320 | 0.125 |                                         |
|              |                        | 230 | 3.067 | 3.094 | 2.263 | 0.377 | 0.329 | 0.125 |                                         |
|              |                        | 240 | 3.069 | 3.109 | 2.263 | 0.383 | 0.338 | 0.125 |                                         |
|              |                        | 250 | 3.087 | 3.123 | 2.263 | 0.388 | 0.347 | 0.125 |                                         |
|              |                        | 260 | 3.115 | 3.136 | 2.263 | 0.393 | 0.355 | 0.125 |                                         |
|              |                        | 270 | 3.113 | 3.149 | 2.263 | 0.397 | 0.363 | 0.125 |                                         |
|              |                        | 280 | 3.119 | 3.161 | 2.263 | 0.402 | 0.371 | 0.125 |                                         |
|              |                        | 290 | 3.150 | 3.173 | 2.263 | 0.405 | 0.379 | 0.125 |                                         |
|              |                        | 300 | 3.164 | 3.183 | 2.263 | 0.409 | 0.386 | 0.125 |                                         |
|              |                        | 310 | 3.175 | 3.194 | 2.263 | 0.412 | 0.393 | 0.125 |                                         |
|              |                        | 320 | 3.159 | 3.204 | 2.263 | 0.415 | 0.400 | 0.125 |                                         |
|              |                        | 330 | 3.198 | 3.213 | 2.263 | 0.418 | 0.407 | 0.125 |                                         |
|              |                        | 340 | 3.206 | 3.222 | 2.263 | 0.421 | 0.413 | 0.125 |                                         |
|              |                        | 350 | 3.209 | 3.230 | 2.263 | 0.423 | 0.419 | 0.125 |                                         |
|              |                        | 360 | 3.220 | 3.239 | 2.263 | 0.426 | 0.425 | 0.125 |                                         |
|              |                        | 370 | 3.211 | 3.246 | 2.263 | 0.428 | 0.430 | 0.125 |                                         |
|              |                        | 380 | 3.235 | 3.254 | 2.263 | 0.430 | 0.436 | 0.125 |                                         |
|              |                        | 390 | 3.248 | 3.261 | 2.263 | 0.431 | 0.441 | 0.125 |                                         |
|              |                        | 400 | 3.252 | 3.268 | 2.263 | 0.433 | 0.446 | 0.125 |                                         |
|              |                        | 410 | 3.247 | 3.274 | 2.263 | 0.435 | 0.451 | 0.125 |                                         |
|              |                        | 420 | 3.273 | 3.280 | 2.263 | 0.436 | 0.456 | 0.125 |                                         |
|              |                        | 430 | 3.262 | 3.286 | 2.263 | 0.437 | 0.461 | 0.125 |                                         |
|              |                        | 440 | 3.273 | 3.292 | 2.263 | 0.438 | 0.465 | 0.125 |                                         |
|              |                        | 450 | 3.274 | 3.297 | 2.263 | 0.440 | 0.469 | 0.125 |                                         |
|              |                        | 460 | 3.287 | 3.302 | 2.263 | 0.441 | 0.473 | 0.125 |                                         |
|              |                        | 470 | 3.293 | 3.307 | 2.263 | 0.442 | 0.477 | 0.125 |                                         |
|              |                        | 480 | 3.293 | 3.312 | 2.263 | 0.442 | 0.481 | 0.125 |                                         |
|              |                        | 490 | 3.306 | 3.316 | 2.263 | 0.443 | 0.485 | 0.125 |                                         |
|              |                        | 500 | 3.318 | 3.321 | 2.263 | 0.444 | 0.488 | 0.125 |                                         |
|              |                        | 510 | 3.287 | 3.325 | 2.263 | 0.445 | 0.492 | 0.125 |                                         |
|              |                        | 520 | 3.280 | 3.329 | 2.263 | 0.445 | 0.495 | 0.125 |                                         |
|              |                        | 530 | 3.311 | 3.332 | 2.263 | 0.446 | 0.498 | 0.125 |                                         |
|              |                        | 540 | 3.322 | 3.336 | 2.263 | 0.447 | 0.501 | 0.125 |                                         |
|              |                        | 550 | 3.327 | 3.340 | 2.263 | 0.447 | 0.504 | 0.125 |                                         |
|              |                        | 560 | 3.340 | 3.343 | 2.263 | 0.448 | 0.507 | 0.125 |                                         |
|              |                        | 570 | 3.343 | 3.346 | 2.263 | 0.448 | 0.510 | 0.125 |                                         |
|              |                        | 580 | 3.329 | 3.349 | 2.263 | 0.448 | 0.513 | 0.125 |                                         |
|              |                        | 590 | 3.340 | 3.352 | 2.263 | 0.449 | 0.515 | 0.125 |                                         |
|              |                        | 600 | 3.345 | 3.355 | 2.263 | 0.449 | 0.518 | 0.125 |                                         |
| GFET<br>#M45 | $c^{(CEA)} = 20$<br>nM | -50 | 2.255 | 2.265 | -     | -     | -     | -     | $\bar{c}^{(CEA)} \approx$<br>19.4206 nM |
|              |                        | -40 | 2.291 | 2.265 |       |       |       |       |                                         |

|                                                            |       |       |       |       |       |       |       |                                                                                             |
|------------------------------------------------------------|-------|-------|-------|-------|-------|-------|-------|---------------------------------------------------------------------------------------------|
| $c^{(AFP)} = 100 \text{ nM}$<br>$c^{(PTH)} = 2 \text{ nM}$ | -30   | 2.271 | 2.265 |       |       |       |       | $\bar{c}^{(AFP)} \approx 55.3421 \text{ nM}$<br>$\bar{c}^{(PTH)} \approx 4.4097 \text{ nM}$ |
|                                                            | -20   | 2.269 | 2.265 |       |       |       |       |                                                                                             |
|                                                            | -10   | 2.251 | 2.265 |       |       |       |       |                                                                                             |
|                                                            | 0     | 2.251 | 2.265 | 2.265 | 0.000 | 0.000 | 0.000 |                                                                                             |
|                                                            | 10    | 2.391 | 2.338 | 2.265 | 0.029 | 0.039 | 0.005 |                                                                                             |
|                                                            | 20    | 2.501 | 2.406 | 2.265 | 0.056 | 0.076 | 0.009 |                                                                                             |
|                                                            | 30    | 2.539 | 2.470 | 2.265 | 0.082 | 0.110 | 0.013 |                                                                                             |
|                                                            | 40    | 2.602 | 2.529 | 2.265 | 0.105 | 0.143 | 0.017 |                                                                                             |
|                                                            | 50    | 2.618 | 2.585 | 2.265 | 0.127 | 0.173 | 0.020 |                                                                                             |
|                                                            | 60    | 2.692 | 2.637 | 2.265 | 0.148 | 0.201 | 0.024 |                                                                                             |
|                                                            | 70    | 2.707 | 2.686 | 2.265 | 0.166 | 0.228 | 0.027 |                                                                                             |
|                                                            | 80    | 2.755 | 2.731 | 2.265 | 0.184 | 0.253 | 0.030 |                                                                                             |
|                                                            | 90    | 2.780 | 2.774 | 2.265 | 0.200 | 0.276 | 0.032 |                                                                                             |
|                                                            | 100   | 2.823 | 2.814 | 2.265 | 0.216 | 0.298 | 0.035 |                                                                                             |
|                                                            | 110   | 2.881 | 2.851 | 2.265 | 0.230 | 0.319 | 0.037 |                                                                                             |
|                                                            | 120   | 2.887 | 2.886 | 2.265 | 0.243 | 0.339 | 0.039 |                                                                                             |
|                                                            | 130   | 2.916 | 2.918 | 2.265 | 0.255 | 0.357 | 0.041 |                                                                                             |
|                                                            | 140   | 2.937 | 2.949 | 2.265 | 0.267 | 0.374 | 0.043 |                                                                                             |
|                                                            | 150   | 2.968 | 2.977 | 2.265 | 0.277 | 0.390 | 0.045 |                                                                                             |
|                                                            | 160   | 2.976 | 3.004 | 2.265 | 0.287 | 0.405 | 0.047 |                                                                                             |
|                                                            | 170   | 3.021 | 3.028 | 2.265 | 0.296 | 0.419 | 0.048 |                                                                                             |
|                                                            | 180   | 3.043 | 3.052 | 2.265 | 0.305 | 0.432 | 0.050 |                                                                                             |
|                                                            | 190   | 3.068 | 3.073 | 2.265 | 0.313 | 0.445 | 0.051 |                                                                                             |
|                                                            | 200   | 3.065 | 3.094 | 2.265 | 0.320 | 0.456 | 0.052 |                                                                                             |
|                                                            | 210   | 3.109 | 3.113 | 2.265 | 0.327 | 0.467 | 0.053 |                                                                                             |
|                                                            | 220   | 3.090 | 3.130 | 2.265 | 0.334 | 0.477 | 0.055 |                                                                                             |
|                                                            | 230   | 3.127 | 3.147 | 2.265 | 0.340 | 0.487 | 0.056 |                                                                                             |
|                                                            | 240   | 3.138 | 3.162 | 2.265 | 0.345 | 0.496 | 0.057 |                                                                                             |
|                                                            | 250   | 3.157 | 3.177 | 2.265 | 0.350 | 0.504 | 0.057 |                                                                                             |
|                                                            | 260   | 3.163 | 3.190 | 2.265 | 0.355 | 0.512 | 0.058 |                                                                                             |
|                                                            | 270   | 3.162 | 3.203 | 2.265 | 0.359 | 0.520 | 0.059 |                                                                                             |
|                                                            | 280   | 3.201 | 3.215 | 2.265 | 0.364 | 0.527 | 0.060 |                                                                                             |
|                                                            | 290   | 3.223 | 3.226 | 2.265 | 0.367 | 0.533 | 0.060 |                                                                                             |
|                                                            | 300   | 3.212 | 3.236 | 2.265 | 0.371 | 0.540 | 0.061 |                                                                                             |
|                                                            | 310   | 3.223 | 3.246 | 2.265 | 0.374 | 0.545 | 0.062 |                                                                                             |
|                                                            | 320   | 3.242 | 3.255 | 2.265 | 0.377 | 0.551 | 0.062 |                                                                                             |
|                                                            | 330   | 3.241 | 3.264 | 2.265 | 0.380 | 0.556 | 0.063 |                                                                                             |
|                                                            | 340   | 3.241 | 3.272 | 2.265 | 0.383 | 0.561 | 0.063 |                                                                                             |
|                                                            | 350   | 3.281 | 3.279 | 2.265 | 0.385 | 0.565 | 0.064 |                                                                                             |
|                                                            | 360   | 3.247 | 3.286 | 2.265 | 0.388 | 0.569 | 0.064 |                                                                                             |
|                                                            | 370   | 3.283 | 3.292 | 2.265 | 0.390 | 0.573 | 0.064 |                                                                                             |
|                                                            | 380   | 3.274 | 3.298 | 2.265 | 0.392 | 0.577 | 0.065 |                                                                                             |
| 390                                                        | 3.296 | 3.304 | 2.265 | 0.394 | 0.580 | 0.065 |       |                                                                                             |
| 400                                                        | 3.313 | 3.309 | 2.265 | 0.396 | 0.584 | 0.066 |       |                                                                                             |
| 410                                                        | 3.295 | 3.314 | 2.265 | 0.397 | 0.587 | 0.066 |       |                                                                                             |
| 420                                                        | 3.326 | 3.319 | 2.265 | 0.399 | 0.589 | 0.066 |       |                                                                                             |

|              |                                                                            |       |       |       |       |       |       |       |                                                                                                                           |
|--------------|----------------------------------------------------------------------------|-------|-------|-------|-------|-------|-------|-------|---------------------------------------------------------------------------------------------------------------------------|
|              |                                                                            | 430   | 3.332 | 3.323 | 2.265 | 0.400 | 0.592 | 0.066 |                                                                                                                           |
|              |                                                                            | 440   | 3.328 | 3.327 | 2.265 | 0.401 | 0.595 | 0.067 |                                                                                                                           |
|              |                                                                            | 450   | 3.338 | 3.331 | 2.265 | 0.403 | 0.597 | 0.067 |                                                                                                                           |
|              |                                                                            | 460   | 3.309 | 3.335 | 2.265 | 0.404 | 0.599 | 0.067 |                                                                                                                           |
|              |                                                                            | 470   | 3.319 | 3.338 | 2.265 | 0.405 | 0.601 | 0.067 |                                                                                                                           |
|              |                                                                            | 480   | 3.326 | 3.341 | 2.265 | 0.406 | 0.603 | 0.067 |                                                                                                                           |
|              |                                                                            | 490   | 3.322 | 3.344 | 2.265 | 0.407 | 0.605 | 0.068 |                                                                                                                           |
|              |                                                                            | 500   | 3.334 | 3.347 | 2.265 | 0.408 | 0.607 | 0.068 |                                                                                                                           |
|              |                                                                            | 510   | 3.344 | 3.349 | 2.265 | 0.408 | 0.608 | 0.068 |                                                                                                                           |
|              |                                                                            | 520   | 3.362 | 3.352 | 2.265 | 0.409 | 0.610 | 0.068 |                                                                                                                           |
|              |                                                                            | 530   | 3.354 | 3.354 | 2.265 | 0.410 | 0.611 | 0.068 |                                                                                                                           |
|              |                                                                            | 540   | 3.345 | 3.356 | 2.265 | 0.410 | 0.613 | 0.068 |                                                                                                                           |
|              |                                                                            | 550   | 3.357 | 3.358 | 2.265 | 0.411 | 0.614 | 0.068 |                                                                                                                           |
|              |                                                                            | 560   | 3.370 | 3.360 | 2.265 | 0.411 | 0.615 | 0.068 |                                                                                                                           |
|              |                                                                            | 570   | 3.375 | 3.362 | 2.265 | 0.412 | 0.616 | 0.069 |                                                                                                                           |
|              |                                                                            | 580   | 3.380 | 3.363 | 2.265 | 0.412 | 0.617 | 0.069 |                                                                                                                           |
|              |                                                                            | 590   | 3.364 | 3.365 | 2.265 | 0.413 | 0.618 | 0.069 |                                                                                                                           |
|              |                                                                            | 600   | 3.352 | 3.366 | 2.265 | 0.413 | 0.619 | 0.069 |                                                                                                                           |
| GFET<br>#M46 | $c^{(CEA)} = 20$<br>nM<br>$c^{(AFP)} = 100$<br>nM<br>$c^{(PTH)} = 5$<br>nM | -50   | 2.287 | 2.275 | -     | -     | -     | -     | $\tilde{c}^{(CEA)} \approx 20.8966$ nM<br>$\tilde{c}^{(AFP)} \approx 49.3864$ nM<br>$\tilde{c}^{(PTH)} \approx 8.5241$ nM |
|              |                                                                            | -40   | 2.296 | 2.275 |       |       |       |       |                                                                                                                           |
|              |                                                                            | -30   | 2.263 | 2.275 |       |       |       |       |                                                                                                                           |
|              |                                                                            | -20   | 2.272 | 2.275 |       |       |       |       |                                                                                                                           |
|              |                                                                            | -10   | 2.266 | 2.275 |       |       |       |       |                                                                                                                           |
|              |                                                                            | 0     | 2.266 | 2.275 | 2.275 | 0.000 | 0.000 | 0.000 |                                                                                                                           |
|              |                                                                            | 10    | 2.408 | 2.350 | 2.275 | 0.033 | 0.033 | 0.009 |                                                                                                                           |
|              |                                                                            | 20    | 2.505 | 2.420 | 2.275 | 0.064 | 0.065 | 0.017 |                                                                                                                           |
|              |                                                                            | 30    | 2.553 | 2.486 | 2.275 | 0.092 | 0.094 | 0.024 |                                                                                                                           |
|              |                                                                            | 40    | 2.610 | 2.546 | 2.275 | 0.118 | 0.122 | 0.031 |                                                                                                                           |
|              |                                                                            | 50    | 2.679 | 2.603 | 2.275 | 0.143 | 0.148 | 0.037 |                                                                                                                           |
|              |                                                                            | 60    | 2.711 | 2.655 | 2.275 | 0.165 | 0.173 | 0.042 |                                                                                                                           |
|              |                                                                            | 70    | 2.732 | 2.704 | 2.275 | 0.186 | 0.197 | 0.047 |                                                                                                                           |
|              |                                                                            | 80    | 2.770 | 2.750 | 2.275 | 0.205 | 0.219 | 0.051 |                                                                                                                           |
|              |                                                                            | 90    | 2.808 | 2.792 | 2.275 | 0.223 | 0.240 | 0.055 |                                                                                                                           |
|              |                                                                            | 100   | 2.816 | 2.832 | 2.275 | 0.239 | 0.260 | 0.058 |                                                                                                                           |
|              |                                                                            | 110   | 2.862 | 2.869 | 2.275 | 0.255 | 0.278 | 0.061 |                                                                                                                           |
|              |                                                                            | 120   | 2.907 | 2.903 | 2.275 | 0.269 | 0.296 | 0.064 |                                                                                                                           |
|              |                                                                            | 130   | 2.962 | 2.935 | 2.275 | 0.282 | 0.312 | 0.066 |                                                                                                                           |
|              |                                                                            | 140   | 2.956 | 2.965 | 2.275 | 0.294 | 0.328 | 0.068 |                                                                                                                           |
|              |                                                                            | 150   | 2.969 | 2.993 | 2.275 | 0.305 | 0.343 | 0.070 |                                                                                                                           |
|              |                                                                            | 160   | 2.999 | 3.019 | 2.275 | 0.315 | 0.357 | 0.072 |                                                                                                                           |
|              |                                                                            | 170   | 3.003 | 3.043 | 2.275 | 0.325 | 0.370 | 0.073 |                                                                                                                           |
|              |                                                                            | 180   | 3.054 | 3.066 | 2.275 | 0.334 | 0.382 | 0.075 |                                                                                                                           |
| 190          | 3.053                                                                      | 3.087 | 2.275 | 0.342 | 0.394 | 0.076 |       |       |                                                                                                                           |
| 200          | 3.052                                                                      | 3.107 | 2.275 | 0.350 | 0.405 | 0.077 |       |       |                                                                                                                           |
| 210          | 3.109                                                                      | 3.125 | 2.275 | 0.357 | 0.416 | 0.078 |       |       |                                                                                                                           |
| 220          | 3.126                                                                      | 3.142 | 2.275 | 0.363 | 0.425 | 0.079 |       |       |                                                                                                                           |

|              |                         |       |       |       |       |       |       |       |                                           |
|--------------|-------------------------|-------|-------|-------|-------|-------|-------|-------|-------------------------------------------|
|              |                         | 230   | 3.130 | 3.158 | 2.275 | 0.369 | 0.435 | 0.080 |                                           |
|              |                         | 240   | 3.124 | 3.173 | 2.275 | 0.375 | 0.443 | 0.080 |                                           |
|              |                         | 250   | 3.179 | 3.187 | 2.275 | 0.380 | 0.452 | 0.081 |                                           |
|              |                         | 260   | 3.169 | 3.200 | 2.275 | 0.384 | 0.460 | 0.082 |                                           |
|              |                         | 270   | 3.178 | 3.213 | 2.275 | 0.389 | 0.467 | 0.082 |                                           |
|              |                         | 280   | 3.203 | 3.224 | 2.275 | 0.393 | 0.474 | 0.083 |                                           |
|              |                         | 290   | 3.222 | 3.235 | 2.275 | 0.397 | 0.480 | 0.083 |                                           |
|              |                         | 300   | 3.205 | 3.245 | 2.275 | 0.400 | 0.487 | 0.083 |                                           |
|              |                         | 310   | 3.219 | 3.254 | 2.275 | 0.403 | 0.493 | 0.084 |                                           |
|              |                         | 320   | 3.250 | 3.263 | 2.275 | 0.406 | 0.498 | 0.084 |                                           |
|              |                         | 330   | 3.257 | 3.271 | 2.275 | 0.409 | 0.503 | 0.084 |                                           |
|              |                         | 340   | 3.252 | 3.279 | 2.275 | 0.412 | 0.508 | 0.084 |                                           |
|              |                         | 350   | 3.255 | 3.286 | 2.275 | 0.414 | 0.513 | 0.085 |                                           |
|              |                         | 360   | 3.268 | 3.293 | 2.275 | 0.416 | 0.517 | 0.085 |                                           |
|              |                         | 370   | 3.267 | 3.299 | 2.275 | 0.418 | 0.521 | 0.085 |                                           |
|              |                         | 380   | 3.297 | 3.305 | 2.275 | 0.420 | 0.525 | 0.085 |                                           |
|              |                         | 390   | 3.283 | 3.311 | 2.275 | 0.422 | 0.529 | 0.085 |                                           |
|              |                         | 400   | 3.306 | 3.316 | 2.275 | 0.423 | 0.532 | 0.085 |                                           |
|              |                         | 410   | 3.295 | 3.321 | 2.275 | 0.425 | 0.536 | 0.085 |                                           |
|              |                         | 420   | 3.311 | 3.326 | 2.275 | 0.426 | 0.539 | 0.086 |                                           |
|              |                         | 430   | 3.318 | 3.330 | 2.275 | 0.428 | 0.542 | 0.086 |                                           |
|              |                         | 440   | 3.327 | 3.334 | 2.275 | 0.429 | 0.544 | 0.086 |                                           |
|              |                         | 450   | 3.301 | 3.338 | 2.275 | 0.430 | 0.547 | 0.086 |                                           |
|              |                         | 460   | 3.327 | 3.341 | 2.275 | 0.431 | 0.550 | 0.086 |                                           |
|              |                         | 470   | 3.359 | 3.344 | 2.275 | 0.432 | 0.552 | 0.086 |                                           |
|              |                         | 480   | 3.350 | 3.348 | 2.275 | 0.433 | 0.554 | 0.086 |                                           |
|              |                         | 490   | 3.345 | 3.350 | 2.275 | 0.433 | 0.556 | 0.086 |                                           |
|              |                         | 500   | 3.367 | 3.353 | 2.275 | 0.434 | 0.558 | 0.086 |                                           |
|              |                         | 510   | 3.345 | 3.356 | 2.275 | 0.435 | 0.560 | 0.086 |                                           |
|              |                         | 520   | 3.359 | 3.358 | 2.275 | 0.436 | 0.562 | 0.086 |                                           |
|              |                         | 530   | 3.344 | 3.360 | 2.275 | 0.436 | 0.563 | 0.086 |                                           |
|              |                         | 540   | 3.377 | 3.363 | 2.275 | 0.437 | 0.565 | 0.086 |                                           |
|              |                         | 550   | 3.357 | 3.364 | 2.275 | 0.437 | 0.566 | 0.086 |                                           |
|              |                         | 560   | 3.371 | 3.366 | 2.275 | 0.438 | 0.568 | 0.086 |                                           |
|              |                         | 570   | 3.357 | 3.368 | 2.275 | 0.438 | 0.569 | 0.086 |                                           |
|              |                         | 580   | 3.362 | 3.370 | 2.275 | 0.438 | 0.570 | 0.086 |                                           |
|              |                         | 590   | 3.384 | 3.371 | 2.275 | 0.439 | 0.571 | 0.086 |                                           |
|              |                         | 600   | 3.385 | 3.373 | 2.275 | 0.439 | 0.572 | 0.086 |                                           |
| GFET<br>#M47 | $c^{(CEA)} = 20$<br>nM  | -50   | 2.296 | 2.269 | -     | -     | -     | -     | $\tilde{c}^{(CEA)} \approx$<br>22.1644 nM |
|              |                         | -40   | 2.239 | 2.269 |       |       |       |       |                                           |
|              |                         | -30   | 2.267 | 2.269 |       |       |       |       |                                           |
|              | $c^{(AFP)} =$<br>100 nM | -20   | 2.280 | 2.269 | -     | -     | -     | -     | $\tilde{c}^{(AFP)} \approx$<br>48.2116 nM |
|              |                         | -10   | 2.266 | 2.269 |       |       |       |       |                                           |
|              | $c^{(PTH)} = 20$<br>nM  | 0     | 2.266 | 2.269 | 2.269 | 0.000 | 0.000 | 0.000 | $\tilde{c}^{(PTH)} \approx$<br>48.0766 nM |
|              |                         | 10    | 2.393 | 2.369 | 2.269 | 0.034 | 0.034 | 0.032 |                                           |
| 20           |                         | 2.500 | 2.451 | 2.269 | 0.064 | 0.066 | 0.051 |       |                                           |

|     |       |       |       |       |       |       |
|-----|-------|-------|-------|-------|-------|-------|
| 30  | 2.562 | 2.521 | 2.269 | 0.093 | 0.096 | 0.063 |
| 40  | 2.615 | 2.583 | 2.269 | 0.119 | 0.125 | 0.070 |
| 50  | 2.689 | 2.639 | 2.269 | 0.143 | 0.152 | 0.074 |
| 60  | 2.723 | 2.689 | 2.269 | 0.166 | 0.178 | 0.076 |
| 70  | 2.760 | 2.735 | 2.269 | 0.186 | 0.202 | 0.078 |
| 80  | 2.771 | 2.778 | 2.269 | 0.205 | 0.225 | 0.079 |
| 90  | 2.825 | 2.817 | 2.269 | 0.222 | 0.246 | 0.079 |
| 100 | 2.849 | 2.854 | 2.269 | 0.238 | 0.267 | 0.079 |
| 110 | 2.894 | 2.888 | 2.269 | 0.253 | 0.286 | 0.080 |
| 120 | 2.900 | 2.920 | 2.269 | 0.267 | 0.304 | 0.080 |
| 130 | 2.948 | 2.950 | 2.269 | 0.279 | 0.322 | 0.080 |
| 140 | 2.990 | 2.978 | 2.269 | 0.291 | 0.338 | 0.080 |
| 150 | 3.025 | 3.004 | 2.269 | 0.301 | 0.353 | 0.080 |
| 160 | 3.030 | 3.028 | 2.269 | 0.311 | 0.368 | 0.080 |
| 170 | 3.039 | 3.051 | 2.269 | 0.320 | 0.381 | 0.080 |
| 180 | 3.060 | 3.072 | 2.269 | 0.329 | 0.394 | 0.080 |
| 190 | 3.086 | 3.092 | 2.269 | 0.336 | 0.407 | 0.080 |
| 200 | 3.111 | 3.111 | 2.269 | 0.343 | 0.418 | 0.080 |
| 210 | 3.107 | 3.128 | 2.269 | 0.350 | 0.429 | 0.080 |
| 220 | 3.126 | 3.144 | 2.269 | 0.356 | 0.440 | 0.080 |
| 230 | 3.157 | 3.160 | 2.269 | 0.361 | 0.449 | 0.080 |
| 240 | 3.140 | 3.174 | 2.269 | 0.366 | 0.459 | 0.080 |
| 250 | 3.181 | 3.187 | 2.269 | 0.371 | 0.467 | 0.080 |
| 260 | 3.211 | 3.200 | 2.269 | 0.375 | 0.475 | 0.080 |
| 270 | 3.191 | 3.211 | 2.269 | 0.379 | 0.483 | 0.080 |
| 280 | 3.196 | 3.222 | 2.269 | 0.383 | 0.491 | 0.080 |
| 290 | 3.242 | 3.233 | 2.269 | 0.386 | 0.498 | 0.080 |
| 300 | 3.258 | 3.242 | 2.269 | 0.389 | 0.504 | 0.080 |
| 310 | 3.235 | 3.252 | 2.269 | 0.392 | 0.510 | 0.080 |
| 320 | 3.270 | 3.260 | 2.269 | 0.395 | 0.516 | 0.080 |
| 330 | 3.234 | 3.268 | 2.269 | 0.397 | 0.522 | 0.080 |
| 340 | 3.273 | 3.275 | 2.269 | 0.399 | 0.527 | 0.080 |
| 350 | 3.250 | 3.282 | 2.269 | 0.401 | 0.532 | 0.080 |
| 360 | 3.252 | 3.289 | 2.269 | 0.403 | 0.537 | 0.080 |
| 370 | 3.286 | 3.295 | 2.269 | 0.405 | 0.541 | 0.080 |
| 380 | 3.321 | 3.301 | 2.269 | 0.407 | 0.545 | 0.080 |
| 390 | 3.284 | 3.306 | 2.269 | 0.408 | 0.549 | 0.080 |
| 400 | 3.290 | 3.311 | 2.269 | 0.410 | 0.553 | 0.080 |
| 410 | 3.301 | 3.316 | 2.269 | 0.411 | 0.556 | 0.080 |
| 420 | 3.293 | 3.321 | 2.269 | 0.412 | 0.560 | 0.080 |
| 430 | 3.319 | 3.325 | 2.269 | 0.413 | 0.563 | 0.080 |
| 440 | 3.325 | 3.329 | 2.269 | 0.414 | 0.566 | 0.080 |
| 450 | 3.337 | 3.333 | 2.269 | 0.415 | 0.569 | 0.080 |
| 460 | 3.328 | 3.336 | 2.269 | 0.416 | 0.571 | 0.080 |
| 470 | 3.338 | 3.339 | 2.269 | 0.417 | 0.574 | 0.080 |
| 480 | 3.305 | 3.342 | 2.269 | 0.417 | 0.576 | 0.080 |



|              |                                                                             |       |       |       |       |       |       |       |                                                                                                                      |  |
|--------------|-----------------------------------------------------------------------------|-------|-------|-------|-------|-------|-------|-------|----------------------------------------------------------------------------------------------------------------------|--|
|              |                                                                             | 490   | 3.339 | 3.345 | 2.269 | 0.418 | 0.578 | 0.080 |                                                                                                                      |  |
|              |                                                                             | 500   | 3.345 | 3.348 | 2.269 | 0.418 | 0.580 | 0.080 |                                                                                                                      |  |
|              |                                                                             | 510   | 3.331 | 3.350 | 2.269 | 0.419 | 0.582 | 0.080 |                                                                                                                      |  |
|              |                                                                             | 520   | 3.343 | 3.353 | 2.269 | 0.420 | 0.584 | 0.080 |                                                                                                                      |  |
|              |                                                                             | 530   | 3.354 | 3.355 | 2.269 | 0.420 | 0.586 | 0.080 |                                                                                                                      |  |
|              |                                                                             | 540   | 3.384 | 3.357 | 2.269 | 0.420 | 0.588 | 0.080 |                                                                                                                      |  |
|              |                                                                             | 550   | 3.371 | 3.359 | 2.269 | 0.421 | 0.589 | 0.080 |                                                                                                                      |  |
|              |                                                                             | 560   | 3.361 | 3.361 | 2.269 | 0.421 | 0.591 | 0.080 |                                                                                                                      |  |
|              |                                                                             | 570   | 3.374 | 3.363 | 2.269 | 0.422 | 0.592 | 0.080 |                                                                                                                      |  |
|              |                                                                             | 580   | 3.370 | 3.365 | 2.269 | 0.422 | 0.594 | 0.080 |                                                                                                                      |  |
|              |                                                                             | 590   | 3.373 | 3.366 | 2.269 | 0.422 | 0.595 | 0.080 |                                                                                                                      |  |
|              |                                                                             | 600   | 3.349 | 3.368 | 2.269 | 0.422 | 0.596 | 0.080 |                                                                                                                      |  |
| GFET<br>#M48 | $c^{(CEA)} = 20$<br>nM<br>$c^{(AFP)} = 100$<br>nM<br>$c^{(PTH)} = 50$<br>nM | -50   | 2.281 | 2.278 |       |       |       |       | $\bar{c}^{(CEA)} \approx 20.2324$ nM<br>$\bar{c}^{(AFP)} \approx 52.1447$ nM<br>$\bar{c}^{(PTH)} \approx 99.2355$ nM |  |
|              |                                                                             | -40   | 2.278 | 2.278 |       |       |       |       |                                                                                                                      |  |
|              |                                                                             | -30   | 2.254 | 2.278 | -     | -     | -     | -     |                                                                                                                      |  |
|              |                                                                             | -20   | 2.283 | 2.278 |       |       |       |       |                                                                                                                      |  |
|              |                                                                             | -10   | 2.285 | 2.278 |       |       |       |       |                                                                                                                      |  |
|              |                                                                             | 0     | 2.285 | 2.278 | 2.278 | 0.000 | 0.000 | 0.000 |                                                                                                                      |  |
|              |                                                                             | 10    | 2.437 | 2.399 | 2.278 | 0.031 | 0.035 | 0.055 |                                                                                                                      |  |
|              |                                                                             | 20    | 2.533 | 2.480 | 2.278 | 0.060 | 0.068 | 0.074 |                                                                                                                      |  |
|              |                                                                             | 30    | 2.603 | 2.545 | 2.278 | 0.087 | 0.099 | 0.081 |                                                                                                                      |  |
|              |                                                                             | 40    | 2.647 | 2.602 | 2.278 | 0.112 | 0.128 | 0.084 |                                                                                                                      |  |
|              |                                                                             | 50    | 2.684 | 2.654 | 2.278 | 0.136 | 0.156 | 0.085 |                                                                                                                      |  |
|              |                                                                             | 60    | 2.737 | 2.701 | 2.278 | 0.157 | 0.182 | 0.085 |                                                                                                                      |  |
|              |                                                                             | 70    | 2.793 | 2.746 | 2.278 | 0.177 | 0.206 | 0.085 |                                                                                                                      |  |
|              |                                                                             | 80    | 2.833 | 2.787 | 2.278 | 0.196 | 0.229 | 0.085 |                                                                                                                      |  |
|              |                                                                             | 90    | 2.836 | 2.826 | 2.278 | 0.213 | 0.251 | 0.085 |                                                                                                                      |  |
|              |                                                                             | 100   | 2.880 | 2.862 | 2.278 | 0.229 | 0.271 | 0.085 |                                                                                                                      |  |
|              |                                                                             | 110   | 2.905 | 2.896 | 2.278 | 0.244 | 0.290 | 0.085 |                                                                                                                      |  |
|              |                                                                             | 120   | 2.921 | 2.928 | 2.278 | 0.257 | 0.308 | 0.085 |                                                                                                                      |  |
|              |                                                                             | 130   | 2.971 | 2.958 | 2.278 | 0.270 | 0.325 | 0.085 |                                                                                                                      |  |
|              |                                                                             | 140   | 3.010 | 2.985 | 2.278 | 0.282 | 0.341 | 0.085 |                                                                                                                      |  |
|              |                                                                             | 150   | 3.004 | 3.011 | 2.278 | 0.293 | 0.356 | 0.085 |                                                                                                                      |  |
|              |                                                                             | 160   | 3.031 | 3.036 | 2.278 | 0.303 | 0.370 | 0.085 |                                                                                                                      |  |
|              |                                                                             | 170   | 3.073 | 3.058 | 2.278 | 0.312 | 0.383 | 0.085 |                                                                                                                      |  |
|              |                                                                             | 180   | 3.087 | 3.079 | 2.278 | 0.321 | 0.396 | 0.085 |                                                                                                                      |  |
|              |                                                                             | 190   | 3.088 | 3.099 | 2.278 | 0.329 | 0.408 | 0.085 |                                                                                                                      |  |
|              |                                                                             | 200   | 3.091 | 3.118 | 2.278 | 0.336 | 0.419 | 0.085 |                                                                                                                      |  |
|              |                                                                             | 210   | 3.126 | 3.135 | 2.278 | 0.343 | 0.429 | 0.085 |                                                                                                                      |  |
|              |                                                                             | 220   | 3.135 | 3.152 | 2.278 | 0.350 | 0.439 | 0.085 |                                                                                                                      |  |
| 230          | 3.157                                                                       | 3.167 | 2.278 | 0.356 | 0.448 | 0.085 |       |       |                                                                                                                      |  |
| 240          | 3.172                                                                       | 3.181 | 2.278 | 0.361 | 0.457 | 0.085 |       |       |                                                                                                                      |  |
| 250          | 3.171                                                                       | 3.194 | 2.278 | 0.367 | 0.465 | 0.085 |       |       |                                                                                                                      |  |
| 260          | 3.219                                                                       | 3.207 | 2.278 | 0.371 | 0.473 | 0.085 |       |       |                                                                                                                      |  |
| 270          | 3.200                                                                       | 3.219 | 2.278 | 0.376 | 0.480 | 0.085 |       |       |                                                                                                                      |  |
| 280          | 3.209                                                                       | 3.229 | 2.278 | 0.380 | 0.487 | 0.085 |       |       |                                                                                                                      |  |

|              |                        |       |       |       |       |       |       |                                          |                                           |
|--------------|------------------------|-------|-------|-------|-------|-------|-------|------------------------------------------|-------------------------------------------|
|              |                        | 290   | 3.222 | 3.240 | 2.278 | 0.384 | 0.493 | 0.085                                    |                                           |
|              |                        | 300   | 3.242 | 3.249 | 2.278 | 0.387 | 0.499 | 0.085                                    |                                           |
|              |                        | 310   | 3.231 | 3.258 | 2.278 | 0.391 | 0.505 | 0.085                                    |                                           |
|              |                        | 320   | 3.224 | 3.267 | 2.278 | 0.394 | 0.510 | 0.085                                    |                                           |
|              |                        | 330   | 3.254 | 3.274 | 2.278 | 0.396 | 0.515 | 0.085                                    |                                           |
|              |                        | 340   | 3.258 | 3.282 | 2.278 | 0.399 | 0.520 | 0.085                                    |                                           |
|              |                        | 350   | 3.288 | 3.289 | 2.278 | 0.401 | 0.525 | 0.085                                    |                                           |
|              |                        | 360   | 3.279 | 3.295 | 2.278 | 0.404 | 0.529 | 0.085                                    |                                           |
|              |                        | 370   | 3.289 | 3.301 | 2.278 | 0.406 | 0.533 | 0.085                                    |                                           |
|              |                        | 380   | 3.324 | 3.307 | 2.278 | 0.408 | 0.536 | 0.085                                    |                                           |
|              |                        | 390   | 3.280 | 3.312 | 2.278 | 0.409 | 0.540 | 0.085                                    |                                           |
|              |                        | 400   | 3.296 | 3.317 | 2.278 | 0.411 | 0.543 | 0.085                                    |                                           |
|              |                        | 410   | 3.319 | 3.322 | 2.278 | 0.413 | 0.546 | 0.085                                    |                                           |
|              |                        | 420   | 3.309 | 3.326 | 2.278 | 0.414 | 0.549 | 0.085                                    |                                           |
|              |                        | 430   | 3.305 | 3.330 | 2.278 | 0.415 | 0.552 | 0.085                                    |                                           |
|              |                        | 440   | 3.354 | 3.334 | 2.278 | 0.417 | 0.555 | 0.085                                    |                                           |
|              |                        | 450   | 3.317 | 3.338 | 2.278 | 0.418 | 0.557 | 0.085                                    |                                           |
|              |                        | 460   | 3.351 | 3.341 | 2.278 | 0.419 | 0.559 | 0.085                                    |                                           |
|              |                        | 470   | 3.353 | 3.344 | 2.278 | 0.420 | 0.562 | 0.085                                    |                                           |
|              |                        | 480   | 3.335 | 3.347 | 2.278 | 0.421 | 0.564 | 0.085                                    |                                           |
|              |                        | 490   | 3.333 | 3.350 | 2.278 | 0.422 | 0.565 | 0.085                                    |                                           |
|              |                        | 500   | 3.353 | 3.352 | 2.278 | 0.422 | 0.567 | 0.085                                    |                                           |
|              |                        | 510   | 3.343 | 3.355 | 2.278 | 0.423 | 0.569 | 0.085                                    |                                           |
|              |                        | 520   | 3.342 | 3.357 | 2.278 | 0.424 | 0.571 | 0.085                                    |                                           |
|              |                        | 530   | 3.358 | 3.359 | 2.278 | 0.424 | 0.572 | 0.085                                    |                                           |
|              |                        | 540   | 3.370 | 3.361 | 2.278 | 0.425 | 0.573 | 0.085                                    |                                           |
|              |                        | 550   | 3.374 | 3.363 | 2.278 | 0.426 | 0.575 | 0.085                                    |                                           |
|              |                        | 560   | 3.395 | 3.365 | 2.278 | 0.426 | 0.576 | 0.085                                    |                                           |
|              |                        | 570   | 3.374 | 3.366 | 2.278 | 0.426 | 0.577 | 0.085                                    |                                           |
|              |                        | 580   | 3.373 | 3.368 | 2.278 | 0.427 | 0.578 | 0.085                                    |                                           |
|              |                        | 590   | 3.381 | 3.369 | 2.278 | 0.427 | 0.579 | 0.085                                    |                                           |
|              |                        | 600   | 3.391 | 3.371 | 2.278 | 0.428 | 0.580 | 0.085                                    |                                           |
| GFET<br>#M49 | $c^{(CEA)} = 50$<br>nM | -50   | 2.253 | 2.262 | -     | -     | -     | -                                        | $\tilde{c}^{(CEA)} \approx$<br>53.1264 nM |
|              |                        | -40   | 2.275 | 2.262 |       |       |       |                                          |                                           |
|              |                        | -30   | 2.240 | 2.262 |       |       |       |                                          |                                           |
|              |                        | -20   | 2.277 | 2.262 |       |       |       |                                          |                                           |
|              |                        | -10   | 2.265 | 2.262 |       |       |       |                                          |                                           |
|              | 0                      | 2.265 | 2.262 | 2.262 | 0.000 | 0.000 | 0.000 | $\tilde{c}^{(AFP)} \approx$<br>4.9348 nM |                                           |
|              | $c^{(AFP)} = 5$<br>nM  | 10    | 2.446 | 2.378 | 2.262 | 0.105 | 0.005 |                                          | 0.006                                     |
|              |                        | 20    | 2.492 | 2.474 | 2.262 | 0.191 | 0.009 |                                          | 0.011                                     |
|              | $c^{(PTH)} = 2$<br>nM  | 30    | 2.558 | 2.555 | 2.262 | 0.262 | 0.014 | 0.016                                    | $\tilde{c}^{(PTH)} \approx$<br>6.0437 nM  |
|              |                        | 40    | 2.639 | 2.623 | 2.262 | 0.321 | 0.019 | 0.021                                    |                                           |
|              |                        | 50    | 2.673 | 2.680 | 2.262 | 0.370 | 0.023 | 0.025                                    |                                           |
|              |                        | 60    | 2.724 | 2.729 | 2.262 | 0.410 | 0.027 | 0.029                                    |                                           |
|              |                        | 70    | 2.739 | 2.770 | 2.262 | 0.443 | 0.032 | 0.033                                    |                                           |
| 80           |                        | 2.783 | 2.804 | 2.262 | 0.470 | 0.036 | 0.036 |                                          |                                           |

|     |       |       |       |       |       |       |
|-----|-------|-------|-------|-------|-------|-------|
| 90  | 2.797 | 2.834 | 2.262 | 0.492 | 0.040 | 0.039 |
| 100 | 2.831 | 2.859 | 2.262 | 0.511 | 0.045 | 0.042 |
| 110 | 2.857 | 2.881 | 2.262 | 0.526 | 0.049 | 0.044 |
| 120 | 2.891 | 2.900 | 2.262 | 0.539 | 0.053 | 0.046 |
| 130 | 2.916 | 2.917 | 2.262 | 0.549 | 0.057 | 0.048 |
| 140 | 2.907 | 2.931 | 2.262 | 0.558 | 0.061 | 0.050 |
| 150 | 2.927 | 2.944 | 2.262 | 0.565 | 0.065 | 0.052 |
| 160 | 2.934 | 2.955 | 2.262 | 0.570 | 0.069 | 0.054 |
| 170 | 2.952 | 2.965 | 2.262 | 0.575 | 0.072 | 0.055 |
| 180 | 2.988 | 2.975 | 2.262 | 0.579 | 0.076 | 0.057 |
| 190 | 2.968 | 2.983 | 2.262 | 0.582 | 0.080 | 0.058 |
| 200 | 2.969 | 2.990 | 2.262 | 0.585 | 0.083 | 0.059 |
| 210 | 3.004 | 2.997 | 2.262 | 0.587 | 0.087 | 0.060 |
| 220 | 3.000 | 3.004 | 2.262 | 0.589 | 0.091 | 0.061 |
| 230 | 2.994 | 3.009 | 2.262 | 0.591 | 0.094 | 0.062 |
| 240 | 3.026 | 3.015 | 2.262 | 0.592 | 0.098 | 0.063 |
| 250 | 3.009 | 3.020 | 2.262 | 0.593 | 0.101 | 0.064 |
| 260 | 3.032 | 3.025 | 2.262 | 0.594 | 0.104 | 0.064 |
| 270 | 3.064 | 3.030 | 2.262 | 0.594 | 0.108 | 0.065 |
| 280 | 3.042 | 3.034 | 2.262 | 0.595 | 0.111 | 0.066 |
| 290 | 3.029 | 3.038 | 2.262 | 0.596 | 0.114 | 0.066 |
| 300 | 3.079 | 3.043 | 2.262 | 0.596 | 0.117 | 0.067 |
| 310 | 3.077 | 3.046 | 2.262 | 0.596 | 0.121 | 0.067 |
| 320 | 3.070 | 3.050 | 2.262 | 0.597 | 0.124 | 0.068 |
| 330 | 3.067 | 3.054 | 2.262 | 0.597 | 0.127 | 0.068 |
| 340 | 3.044 | 3.057 | 2.262 | 0.597 | 0.130 | 0.068 |
| 350 | 3.071 | 3.061 | 2.262 | 0.597 | 0.133 | 0.069 |
| 360 | 3.044 | 3.064 | 2.262 | 0.597 | 0.136 | 0.069 |
| 370 | 3.102 | 3.068 | 2.262 | 0.597 | 0.139 | 0.069 |
| 380 | 3.080 | 3.071 | 2.262 | 0.597 | 0.141 | 0.069 |
| 390 | 3.091 | 3.074 | 2.262 | 0.597 | 0.144 | 0.070 |
| 400 | 3.085 | 3.077 | 2.262 | 0.598 | 0.147 | 0.070 |
| 410 | 3.088 | 3.080 | 2.262 | 0.598 | 0.150 | 0.070 |
| 420 | 3.098 | 3.083 | 2.262 | 0.598 | 0.152 | 0.070 |
| 430 | 3.092 | 3.086 | 2.262 | 0.598 | 0.155 | 0.070 |
| 440 | 3.080 | 3.088 | 2.262 | 0.598 | 0.158 | 0.071 |
| 450 | 3.098 | 3.091 | 2.262 | 0.598 | 0.160 | 0.071 |
| 460 | 3.094 | 3.094 | 2.262 | 0.598 | 0.163 | 0.071 |
| 470 | 3.111 | 3.097 | 2.262 | 0.598 | 0.165 | 0.071 |
| 480 | 3.097 | 3.099 | 2.262 | 0.598 | 0.168 | 0.071 |
| 490 | 3.115 | 3.102 | 2.262 | 0.598 | 0.170 | 0.071 |
| 500 | 3.126 | 3.104 | 2.262 | 0.598 | 0.173 | 0.071 |
| 510 | 3.124 | 3.107 | 2.262 | 0.598 | 0.175 | 0.071 |
| 520 | 3.119 | 3.109 | 2.262 | 0.598 | 0.178 | 0.071 |
| 530 | 3.123 | 3.112 | 2.262 | 0.598 | 0.180 | 0.071 |
| 540 | 3.102 | 3.114 | 2.262 | 0.598 | 0.182 | 0.072 |

|              |                        |       |       |       |       |       |       |       |                                           |
|--------------|------------------------|-------|-------|-------|-------|-------|-------|-------|-------------------------------------------|
|              |                        | 550   | 3.115 | 3.116 | 2.262 | 0.598 | 0.184 | 0.072 |                                           |
|              |                        | 560   | 3.111 | 3.119 | 2.262 | 0.598 | 0.187 | 0.072 |                                           |
|              |                        | 570   | 3.116 | 3.121 | 2.262 | 0.598 | 0.189 | 0.072 |                                           |
|              |                        | 580   | 3.121 | 3.123 | 2.262 | 0.598 | 0.191 | 0.072 |                                           |
|              |                        | 590   | 3.116 | 3.125 | 2.262 | 0.598 | 0.193 | 0.072 |                                           |
|              |                        | 600   | 3.140 | 3.127 | 2.262 | 0.598 | 0.195 | 0.072 |                                           |
| GFET<br>#M50 | $c^{(CEA)} = 50$<br>nM | -50   | 2.261 | 2.253 | -     | -     | -     | -     | $\tilde{c}^{(CEA)} \approx$<br>47.3244 nM |
|              |                        | -40   | 2.266 | 2.253 |       |       |       |       |                                           |
|              |                        | -30   | 2.247 | 2.253 |       |       |       |       |                                           |
|              |                        | -20   | 2.254 | 2.253 |       |       |       |       |                                           |
|              |                        | -10   | 2.246 | 2.253 |       |       |       |       |                                           |
|              | 0                      | 2.246 | 2.253 | 2.253 | 0.000 | 0.000 | 0.000 |       |                                           |
|              | 10                     | 2.451 | 2.365 | 2.253 | 0.096 | 0.004 | 0.011 |       |                                           |
|              | 20                     | 2.504 | 2.460 | 2.253 | 0.178 | 0.009 | 0.020 |       |                                           |
|              | 30                     | 2.570 | 2.541 | 2.253 | 0.246 | 0.013 | 0.029 |       |                                           |
|              | 40                     | 2.633 | 2.611 | 2.253 | 0.304 | 0.018 | 0.036 |       |                                           |
|              | 50                     | 2.690 | 2.670 | 2.253 | 0.352 | 0.022 | 0.042 |       |                                           |
|              | 60                     | 2.748 | 2.720 | 2.253 | 0.393 | 0.026 | 0.048 |       |                                           |
|              | 70                     | 2.775 | 2.764 | 2.253 | 0.427 | 0.030 | 0.053 |       |                                           |
|              | 80                     | 2.796 | 2.801 | 2.253 | 0.456 | 0.034 | 0.058 |       |                                           |
|              | 90                     | 2.832 | 2.834 | 2.253 | 0.480 | 0.038 | 0.061 |       |                                           |
|              | 100                    | 2.855 | 2.861 | 2.253 | 0.501 | 0.042 | 0.065 |       |                                           |
|              | 110                    | 2.879 | 2.886 | 2.253 | 0.518 | 0.046 | 0.068 |       |                                           |
|              | 120                    | 2.898 | 2.907 | 2.253 | 0.533 | 0.050 | 0.070 |       |                                           |
|              | 130                    | 2.924 | 2.925 | 2.253 | 0.545 | 0.054 | 0.073 |       |                                           |
|              | 140                    | 2.934 | 2.941 | 2.253 | 0.555 | 0.057 | 0.075 |       |                                           |
|              | 150                    | 2.949 | 2.955 | 2.253 | 0.564 | 0.061 | 0.077 |       |                                           |
|              | 160                    | 2.983 | 2.968 | 2.253 | 0.571 | 0.065 | 0.078 |       |                                           |
|              | 170                    | 2.991 | 2.979 | 2.253 | 0.577 | 0.068 | 0.080 |       |                                           |
|              | 180                    | 2.992 | 2.989 | 2.253 | 0.583 | 0.072 | 0.081 |       |                                           |
|              | 190                    | 2.983 | 2.998 | 2.253 | 0.587 | 0.075 | 0.082 |       |                                           |
|              | 200                    | 2.980 | 3.006 | 2.253 | 0.591 | 0.079 | 0.083 |       |                                           |
|              | 210                    | 3.005 | 3.013 | 2.253 | 0.594 | 0.082 | 0.084 |       |                                           |
|              | 220                    | 3.037 | 3.020 | 2.253 | 0.596 | 0.086 | 0.084 |       |                                           |
|              | 230                    | 3.033 | 3.026 | 2.253 | 0.599 | 0.089 | 0.085 |       |                                           |
|              | 240                    | 3.051 | 3.032 | 2.253 | 0.600 | 0.092 | 0.086 |       |                                           |
|              | 250                    | 3.062 | 3.037 | 2.253 | 0.602 | 0.096 | 0.086 |       |                                           |
|              | 260                    | 3.056 | 3.042 | 2.253 | 0.603 | 0.099 | 0.087 |       |                                           |
|              | 270                    | 3.052 | 3.047 | 2.253 | 0.604 | 0.102 | 0.087 |       |                                           |
|              | 280                    | 3.049 | 3.051 | 2.253 | 0.605 | 0.105 | 0.087 |       |                                           |
| 290          | 3.065                  | 3.055 | 2.253 | 0.606 | 0.108 | 0.088 |       |       |                                           |
| 300          | 3.076                  | 3.059 | 2.253 | 0.607 | 0.111 | 0.088 |       |       |                                           |
| 310          | 3.053                  | 3.063 | 2.253 | 0.607 | 0.114 | 0.088 |       |       |                                           |
| 320          | 3.058                  | 3.067 | 2.253 | 0.608 | 0.117 | 0.088 |       |       |                                           |
| 330          | 3.057                  | 3.070 | 2.253 | 0.608 | 0.120 | 0.088 |       |       |                                           |
| 340          | 3.099                  | 3.073 | 2.253 | 0.608 | 0.123 | 0.089 |       |       |                                           |
|              | $c^{(AFP)} = 5$<br>nM  | 140   | 2.934 | 2.941 | 2.253 | 0.555 | 0.057 | 0.075 | $\tilde{c}^{(AFP)} \approx$<br>4.6553 nM  |
|              | $c^{(PTH)} = 5$<br>nM  | 160   | 2.983 | 2.968 | 2.253 | 0.571 | 0.065 | 0.078 | $\tilde{c}^{(PTH)} \approx$<br>10.2424 nM |
|              |                        | 170   | 2.991 | 2.979 | 2.253 | 0.577 | 0.068 | 0.080 |                                           |
|              |                        | 180   | 2.992 | 2.989 | 2.253 | 0.583 | 0.072 | 0.081 |                                           |
|              |                        | 190   | 2.983 | 2.998 | 2.253 | 0.587 | 0.075 | 0.082 |                                           |
|              |                        | 200   | 2.980 | 3.006 | 2.253 | 0.591 | 0.079 | 0.083 |                                           |
|              |                        | 210   | 3.005 | 3.013 | 2.253 | 0.594 | 0.082 | 0.084 |                                           |
|              |                        | 220   | 3.037 | 3.020 | 2.253 | 0.596 | 0.086 | 0.084 |                                           |
|              |                        | 230   | 3.033 | 3.026 | 2.253 | 0.599 | 0.089 | 0.085 |                                           |
|              |                        | 240   | 3.051 | 3.032 | 2.253 | 0.600 | 0.092 | 0.086 |                                           |
|              |                        | 250   | 3.062 | 3.037 | 2.253 | 0.602 | 0.096 | 0.086 |                                           |
|              |                        | 260   | 3.056 | 3.042 | 2.253 | 0.603 | 0.099 | 0.087 |                                           |
|              |                        | 270   | 3.052 | 3.047 | 2.253 | 0.604 | 0.102 | 0.087 |                                           |
|              |                        | 280   | 3.049 | 3.051 | 2.253 | 0.605 | 0.105 | 0.087 |                                           |
|              |                        | 290   | 3.065 | 3.055 | 2.253 | 0.606 | 0.108 | 0.088 |                                           |
|              |                        | 300   | 3.076 | 3.059 | 2.253 | 0.607 | 0.111 | 0.088 |                                           |
|              |                        | 310   | 3.053 | 3.063 | 2.253 | 0.607 | 0.114 | 0.088 |                                           |
|              |                        | 320   | 3.058 | 3.067 | 2.253 | 0.608 | 0.117 | 0.088 |                                           |
|              |                        | 330   | 3.057 | 3.070 | 2.253 | 0.608 | 0.120 | 0.088 |                                           |
|              |                        | 340   | 3.099 | 3.073 | 2.253 | 0.608 | 0.123 | 0.089 |                                           |

|              |                        |       |       |       |       |       |       |       |                                           |                                           |
|--------------|------------------------|-------|-------|-------|-------|-------|-------|-------|-------------------------------------------|-------------------------------------------|
|              |                        | 350   | 3.077 | 3.077 | 2.253 | 0.609 | 0.126 | 0.089 |                                           |                                           |
|              |                        | 360   | 3.088 | 3.080 | 2.253 | 0.609 | 0.129 | 0.089 |                                           |                                           |
|              |                        | 370   | 3.093 | 3.083 | 2.253 | 0.609 | 0.131 | 0.089 |                                           |                                           |
|              |                        | 380   | 3.093 | 3.086 | 2.253 | 0.609 | 0.134 | 0.089 |                                           |                                           |
|              |                        | 390   | 3.117 | 3.089 | 2.253 | 0.609 | 0.137 | 0.089 |                                           |                                           |
|              |                        | 400   | 3.093 | 3.092 | 2.253 | 0.610 | 0.139 | 0.089 |                                           |                                           |
|              |                        | 410   | 3.080 | 3.094 | 2.253 | 0.610 | 0.142 | 0.089 |                                           |                                           |
|              |                        | 420   | 3.081 | 3.097 | 2.253 | 0.610 | 0.145 | 0.089 |                                           |                                           |
|              |                        | 430   | 3.107 | 3.100 | 2.253 | 0.610 | 0.147 | 0.089 |                                           |                                           |
|              |                        | 440   | 3.099 | 3.102 | 2.253 | 0.610 | 0.150 | 0.089 |                                           |                                           |
|              |                        | 450   | 3.105 | 3.105 | 2.253 | 0.610 | 0.152 | 0.089 |                                           |                                           |
|              |                        | 460   | 3.091 | 3.107 | 2.253 | 0.610 | 0.155 | 0.089 |                                           |                                           |
|              |                        | 470   | 3.092 | 3.110 | 2.253 | 0.610 | 0.157 | 0.089 |                                           |                                           |
|              |                        | 480   | 3.103 | 3.112 | 2.253 | 0.610 | 0.159 | 0.090 |                                           |                                           |
|              |                        | 490   | 3.101 | 3.115 | 2.253 | 0.610 | 0.162 | 0.090 |                                           |                                           |
|              |                        | 500   | 3.102 | 3.117 | 2.253 | 0.610 | 0.164 | 0.090 |                                           |                                           |
|              |                        | 510   | 3.098 | 3.119 | 2.253 | 0.610 | 0.166 | 0.090 |                                           |                                           |
|              |                        | 520   | 3.113 | 3.122 | 2.253 | 0.610 | 0.169 | 0.090 |                                           |                                           |
|              |                        | 530   | 3.109 | 3.124 | 2.253 | 0.610 | 0.171 | 0.090 |                                           |                                           |
|              |                        | 540   | 3.122 | 3.126 | 2.253 | 0.610 | 0.173 | 0.090 |                                           |                                           |
|              |                        | 550   | 3.127 | 3.128 | 2.253 | 0.610 | 0.175 | 0.090 |                                           |                                           |
|              |                        | 560   | 3.124 | 3.131 | 2.253 | 0.610 | 0.177 | 0.090 |                                           |                                           |
|              |                        | 570   | 3.135 | 3.133 | 2.253 | 0.610 | 0.179 | 0.090 |                                           |                                           |
|              |                        | 580   | 3.103 | 3.135 | 2.253 | 0.610 | 0.181 | 0.090 |                                           |                                           |
|              |                        | 590   | 3.103 | 3.137 | 2.253 | 0.610 | 0.184 | 0.090 |                                           |                                           |
|              |                        | 600   | 3.120 | 3.139 | 2.253 | 0.610 | 0.186 | 0.090 |                                           |                                           |
| GFET<br>#M51 | $c^{(CEA)} = 50$<br>nM | -50   | 2.281 | 2.264 | -     | -     | -     | -     | $\tilde{c}^{(CEA)} \approx$<br>49.2514 nM |                                           |
|              |                        | -40   | 2.273 | 2.264 |       |       |       |       |                                           |                                           |
|              |                        | -30   | 2.275 | 2.264 |       |       |       |       |                                           |                                           |
|              |                        | -20   | 2.251 | 2.264 |       |       |       |       |                                           |                                           |
|              |                        | -10   | 2.251 | 2.264 |       |       |       |       |                                           |                                           |
|              | 0                      | 2.251 | 2.264 | 2.264 | 0.000 | 0.000 | 0.000 |       |                                           |                                           |
|              | $c^{(AFP)} = 5$<br>nM  | 10    | 2.454 | 2.401 | 2.264 | 0.098 | 0.004 | 0.035 |                                           | $\tilde{c}^{(AFP)} \approx$<br>4.5166 nM  |
|              |                        | 20    | 2.538 | 2.511 | 2.264 | 0.181 | 0.008 | 0.058 |                                           |                                           |
|              |                        | 30    | 2.597 | 2.599 | 2.264 | 0.250 | 0.012 | 0.073 |                                           |                                           |
|              |                        | 40    | 2.676 | 2.670 | 2.264 | 0.307 | 0.016 | 0.083 |                                           |                                           |
|              |                        | 50    | 2.725 | 2.729 | 2.264 | 0.355 | 0.020 | 0.089 |                                           |                                           |
|              | $c^{(PTH)} = 20$<br>nM | 60    | 2.742 | 2.777 | 2.264 | 0.396 | 0.024 | 0.093 |                                           | $\tilde{c}^{(PTH)} \approx$<br>39.2155 nM |
|              |                        | 70    | 2.775 | 2.817 | 2.264 | 0.429 | 0.028 | 0.096 |                                           |                                           |
|              |                        | 80    | 2.825 | 2.851 | 2.264 | 0.457 | 0.032 | 0.098 |                                           |                                           |
|              |                        | 90    | 2.857 | 2.879 | 2.264 | 0.481 | 0.036 | 0.099 |                                           |                                           |
|              |                        | 100   | 2.892 | 2.904 | 2.264 | 0.501 | 0.040 | 0.100 |                                           |                                           |
|              |                        | 110   | 2.905 | 2.924 | 2.264 | 0.517 | 0.043 | 0.100 |                                           |                                           |
| 120          |                        | 2.918 | 2.942 | 2.264 | 0.531 | 0.047 | 0.101 |       |                                           |                                           |
| 130          | 2.939                  | 2.957 | 2.264 | 0.542 | 0.050 | 0.101 |       |       |                                           |                                           |
| 140          | 2.979                  | 2.971 | 2.264 | 0.552 | 0.054 | 0.101 |       |       |                                           |                                           |

|     |       |       |       |       |       |       |
|-----|-------|-------|-------|-------|-------|-------|
| 150 | 2.979 | 2.982 | 2.264 | 0.560 | 0.057 | 0.101 |
| 160 | 2.993 | 2.992 | 2.264 | 0.567 | 0.061 | 0.101 |
| 170 | 2.995 | 3.001 | 2.264 | 0.572 | 0.064 | 0.101 |
| 180 | 3.000 | 3.010 | 2.264 | 0.577 | 0.068 | 0.101 |
| 190 | 3.006 | 3.017 | 2.264 | 0.581 | 0.071 | 0.101 |
| 200 | 3.039 | 3.023 | 2.264 | 0.584 | 0.074 | 0.101 |
| 210 | 3.012 | 3.029 | 2.264 | 0.587 | 0.077 | 0.101 |
| 220 | 3.038 | 3.035 | 2.264 | 0.589 | 0.081 | 0.101 |
| 230 | 3.046 | 3.040 | 2.264 | 0.591 | 0.084 | 0.101 |
| 240 | 3.048 | 3.045 | 2.264 | 0.593 | 0.087 | 0.101 |
| 250 | 3.059 | 3.049 | 2.264 | 0.594 | 0.090 | 0.101 |
| 260 | 3.070 | 3.053 | 2.264 | 0.595 | 0.093 | 0.101 |
| 270 | 3.064 | 3.057 | 2.264 | 0.596 | 0.096 | 0.101 |
| 280 | 3.046 | 3.061 | 2.264 | 0.597 | 0.099 | 0.101 |
| 290 | 3.065 | 3.064 | 2.264 | 0.598 | 0.102 | 0.101 |
| 300 | 3.093 | 3.068 | 2.264 | 0.598 | 0.105 | 0.101 |
| 310 | 3.092 | 3.071 | 2.264 | 0.599 | 0.107 | 0.101 |
| 320 | 3.074 | 3.074 | 2.264 | 0.599 | 0.110 | 0.101 |
| 330 | 3.099 | 3.077 | 2.264 | 0.599 | 0.113 | 0.101 |
| 340 | 3.097 | 3.080 | 2.264 | 0.600 | 0.116 | 0.101 |
| 350 | 3.077 | 3.083 | 2.264 | 0.600 | 0.118 | 0.101 |
| 360 | 3.098 | 3.086 | 2.264 | 0.600 | 0.121 | 0.101 |
| 370 | 3.095 | 3.089 | 2.264 | 0.600 | 0.123 | 0.101 |
| 380 | 3.082 | 3.091 | 2.264 | 0.600 | 0.126 | 0.101 |
| 390 | 3.095 | 3.094 | 2.264 | 0.600 | 0.129 | 0.101 |
| 400 | 3.103 | 3.097 | 2.264 | 0.601 | 0.131 | 0.101 |
| 410 | 3.113 | 3.099 | 2.264 | 0.601 | 0.134 | 0.101 |
| 420 | 3.113 | 3.102 | 2.264 | 0.601 | 0.136 | 0.101 |
| 430 | 3.111 | 3.104 | 2.264 | 0.601 | 0.138 | 0.101 |
| 440 | 3.096 | 3.106 | 2.264 | 0.601 | 0.141 | 0.101 |
| 450 | 3.106 | 3.109 | 2.264 | 0.601 | 0.143 | 0.101 |
| 460 | 3.131 | 3.111 | 2.264 | 0.601 | 0.145 | 0.101 |
| 470 | 3.115 | 3.114 | 2.264 | 0.601 | 0.148 | 0.101 |
| 480 | 3.099 | 3.116 | 2.264 | 0.601 | 0.150 | 0.101 |
| 490 | 3.110 | 3.118 | 2.264 | 0.601 | 0.152 | 0.101 |
| 500 | 3.115 | 3.120 | 2.264 | 0.601 | 0.154 | 0.101 |
| 510 | 3.112 | 3.122 | 2.264 | 0.601 | 0.157 | 0.101 |
| 520 | 3.102 | 3.125 | 2.264 | 0.601 | 0.159 | 0.101 |
| 530 | 3.126 | 3.127 | 2.264 | 0.601 | 0.161 | 0.101 |
| 540 | 3.113 | 3.129 | 2.264 | 0.601 | 0.163 | 0.101 |
| 550 | 3.122 | 3.131 | 2.264 | 0.601 | 0.165 | 0.101 |
| 560 | 3.119 | 3.133 | 2.264 | 0.601 | 0.167 | 0.101 |
| 570 | 3.139 | 3.135 | 2.264 | 0.601 | 0.169 | 0.101 |
| 580 | 3.138 | 3.137 | 2.264 | 0.601 | 0.171 | 0.101 |
| 590 | 3.139 | 3.139 | 2.264 | 0.601 | 0.173 | 0.101 |
| 600 | 3.126 | 3.141 | 2.264 | 0.601 | 0.175 | 0.101 |

|              |                        |       |       |       |       |       |       |                                         |                                        |
|--------------|------------------------|-------|-------|-------|-------|-------|-------|-----------------------------------------|----------------------------------------|
| GFET<br>#M52 | $c^{(CEA)} = 50$<br>nM | -50   | 2.246 | 2.252 | -     | -     | -     | -                                       | $\tilde{c}^{(CEA)} \approx 49.2432$ nM |
|              |                        | -40   | 2.249 | 2.252 |       |       |       |                                         |                                        |
|              |                        | -30   | 2.268 | 2.252 |       |       |       |                                         |                                        |
|              |                        | -20   | 2.251 | 2.252 |       |       |       |                                         |                                        |
|              |                        | -10   | 2.251 | 2.252 |       |       |       |                                         |                                        |
|              |                        | 0     | 2.251 | 2.252 | 2.252 | 0.000 | 0.000 | 0.000                                   |                                        |
|              |                        | 10    | 2.447 | 2.424 | 2.252 | 0.099 | 0.004 | 0.067                                   |                                        |
|              |                        | 20    | 2.561 | 2.534 | 2.252 | 0.183 | 0.009 | 0.090                                   |                                        |
|              |                        | 30    | 2.638 | 2.615 | 2.252 | 0.252 | 0.013 | 0.098                                   |                                        |
|              |                        | 40    | 2.694 | 2.680 | 2.252 | 0.310 | 0.017 | 0.100                                   |                                        |
|              |                        | 50    | 2.750 | 2.733 | 2.252 | 0.359 | 0.021 | 0.101                                   |                                        |
|              |                        | 60    | 2.779 | 2.778 | 2.252 | 0.400 | 0.025 | 0.101                                   |                                        |
|              |                        | 70    | 2.825 | 2.817 | 2.252 | 0.434 | 0.029 | 0.102                                   |                                        |
|              |                        | 80    | 2.855 | 2.849 | 2.252 | 0.462 | 0.033 | 0.102                                   |                                        |
|              |                        | 90    | 2.875 | 2.877 | 2.252 | 0.486 | 0.037 | 0.102                                   |                                        |
|              |                        | 100   | 2.885 | 2.900 | 2.252 | 0.506 | 0.041 | 0.102                                   |                                        |
|              |                        | 110   | 2.911 | 2.921 | 2.252 | 0.522 | 0.044 | 0.102                                   |                                        |
|              |                        | 120   | 2.945 | 2.938 | 2.252 | 0.536 | 0.048 | 0.102                                   |                                        |
|              |                        | 130   | 2.934 | 2.954 | 2.252 | 0.548 | 0.052 | 0.102                                   |                                        |
|              |                        | 140   | 2.946 | 2.967 | 2.252 | 0.558 | 0.055 | 0.102                                   |                                        |
|              |                        | 150   | 2.997 | 2.979 | 2.252 | 0.566 | 0.059 | 0.102                                   |                                        |
|              |                        | 160   | 2.993 | 2.989 | 2.252 | 0.572 | 0.062 | 0.102                                   |                                        |
|              |                        | 170   | 2.998 | 2.998 | 2.252 | 0.578 | 0.066 | 0.102                                   |                                        |
|              |                        | 180   | 3.020 | 3.006 | 2.252 | 0.583 | 0.069 | 0.102                                   |                                        |
|              |                        | 190   | 3.014 | 3.014 | 2.252 | 0.587 | 0.073 | 0.102                                   |                                        |
|              |                        | 200   | 3.037 | 3.020 | 2.252 | 0.590 | 0.076 | 0.102                                   |                                        |
|              |                        | 210   | 3.045 | 3.026 | 2.252 | 0.593 | 0.079 | 0.102                                   |                                        |
|              |                        | 220   | 3.035 | 3.032 | 2.252 | 0.595 | 0.083 | 0.102                                   |                                        |
|              |                        | 230   | 3.051 | 3.037 | 2.252 | 0.597 | 0.086 | 0.102                                   |                                        |
|              |                        | 240   | 3.053 | 3.042 | 2.252 | 0.599 | 0.089 | 0.102                                   |                                        |
|              |                        | 250   | 3.074 | 3.046 | 2.252 | 0.600 | 0.092 | 0.102                                   |                                        |
|              |                        | 260   | 3.062 | 3.051 | 2.252 | 0.601 | 0.095 | 0.102                                   |                                        |
|              |                        | 270   | 3.088 | 3.055 | 2.252 | 0.602 | 0.098 | 0.102                                   |                                        |
|              |                        | 280   | 3.071 | 3.058 | 2.252 | 0.603 | 0.101 | 0.102                                   |                                        |
|              |                        | 290   | 3.070 | 3.062 | 2.252 | 0.604 | 0.104 | 0.102                                   |                                        |
|              |                        | 300   | 3.083 | 3.066 | 2.252 | 0.604 | 0.107 | 0.102                                   |                                        |
|              |                        | 310   | 3.077 | 3.069 | 2.252 | 0.605 | 0.110 | 0.102                                   |                                        |
|              |                        | 320   | 3.108 | 3.072 | 2.252 | 0.605 | 0.113 | 0.102                                   |                                        |
|              |                        | 330   | 3.093 | 3.075 | 2.252 | 0.606 | 0.116 | 0.102                                   |                                        |
|              |                        | 340   | 3.080 | 3.078 | 2.252 | 0.606 | 0.118 | 0.102                                   |                                        |
| 350          | 3.093                  | 3.081 | 2.252 | 0.606 | 0.121 | 0.102 |       |                                         |                                        |
| 360          | 3.082                  | 3.084 | 2.252 | 0.606 | 0.124 | 0.102 |       |                                         |                                        |
| 370          | 3.065                  | 3.087 | 2.252 | 0.606 | 0.127 | 0.102 |       |                                         |                                        |
| 380          | 3.096                  | 3.090 | 2.252 | 0.607 | 0.129 | 0.102 |       |                                         |                                        |
| 390          | 3.108                  | 3.092 | 2.252 | 0.607 | 0.132 | 0.102 |       |                                         |                                        |
| 400          | 3.099                  | 3.095 | 2.252 | 0.607 | 0.134 | 0.102 |       |                                         |                                        |
|              | $c^{(AFP)} = 5$<br>nM  |       |       |       |       |       |       | $\tilde{c}^{(AFP)} \approx 4.6324$ nM   |                                        |
|              | $c^{(PTH)} = 50$<br>nM |       |       |       |       |       |       | $\tilde{c}^{(PTH)} \approx 104.1654$ nM |                                        |

|              |                                                                           |       |       |       |       |       |       |       |                                                                                                                           |  |
|--------------|---------------------------------------------------------------------------|-------|-------|-------|-------|-------|-------|-------|---------------------------------------------------------------------------------------------------------------------------|--|
|              |                                                                           | 410   | 3.103 | 3.098 | 2.252 | 0.607 | 0.137 | 0.102 |                                                                                                                           |  |
|              |                                                                           | 420   | 3.097 | 3.100 | 2.252 | 0.607 | 0.139 | 0.102 |                                                                                                                           |  |
|              |                                                                           | 430   | 3.075 | 3.103 | 2.252 | 0.607 | 0.142 | 0.102 |                                                                                                                           |  |
|              |                                                                           | 440   | 3.082 | 3.105 | 2.252 | 0.607 | 0.144 | 0.102 |                                                                                                                           |  |
|              |                                                                           | 450   | 3.082 | 3.108 | 2.252 | 0.607 | 0.147 | 0.102 |                                                                                                                           |  |
|              |                                                                           | 460   | 3.127 | 3.110 | 2.252 | 0.607 | 0.149 | 0.102 |                                                                                                                           |  |
|              |                                                                           | 470   | 3.111 | 3.112 | 2.252 | 0.607 | 0.151 | 0.102 |                                                                                                                           |  |
|              |                                                                           | 480   | 3.095 | 3.115 | 2.252 | 0.607 | 0.154 | 0.102 |                                                                                                                           |  |
|              |                                                                           | 490   | 3.115 | 3.117 | 2.252 | 0.607 | 0.156 | 0.102 |                                                                                                                           |  |
|              |                                                                           | 500   | 3.115 | 3.119 | 2.252 | 0.607 | 0.158 | 0.102 |                                                                                                                           |  |
|              |                                                                           | 510   | 3.105 | 3.121 | 2.252 | 0.607 | 0.160 | 0.102 |                                                                                                                           |  |
|              |                                                                           | 520   | 3.118 | 3.124 | 2.252 | 0.607 | 0.162 | 0.102 |                                                                                                                           |  |
|              |                                                                           | 530   | 3.116 | 3.126 | 2.252 | 0.607 | 0.165 | 0.102 |                                                                                                                           |  |
|              |                                                                           | 540   | 3.096 | 3.128 | 2.252 | 0.607 | 0.167 | 0.102 |                                                                                                                           |  |
|              |                                                                           | 550   | 3.106 | 3.130 | 2.252 | 0.607 | 0.169 | 0.102 |                                                                                                                           |  |
|              |                                                                           | 560   | 3.125 | 3.132 | 2.252 | 0.607 | 0.171 | 0.102 |                                                                                                                           |  |
|              |                                                                           | 570   | 3.116 | 3.134 | 2.252 | 0.607 | 0.173 | 0.102 |                                                                                                                           |  |
|              |                                                                           | 580   | 3.115 | 3.136 | 2.252 | 0.607 | 0.175 | 0.102 |                                                                                                                           |  |
|              |                                                                           | 590   | 3.127 | 3.138 | 2.252 | 0.607 | 0.177 | 0.102 |                                                                                                                           |  |
|              |                                                                           | 600   | 3.106 | 3.140 | 2.252 | 0.607 | 0.179 | 0.102 |                                                                                                                           |  |
| GFET<br>#M53 | $c^{(CEA)} = 50$<br>nM<br>$c^{(AFP)} = 20$<br>nM<br>$c^{(PTH)} = 2$<br>nM | -50   | 2.259 | 2.257 |       |       |       |       | $\tilde{c}^{(CEA)} \approx 48.1774$ nM<br>$\tilde{c}^{(AFP)} \approx 13.8248$ nM<br>$\tilde{c}^{(PTH)} \approx 5.0776$ nM |  |
|              |                                                                           | -40   | 2.246 | 2.257 |       |       |       |       |                                                                                                                           |  |
|              |                                                                           | -30   | 2.247 | 2.257 | -     | -     | -     | -     |                                                                                                                           |  |
|              |                                                                           | -20   | 2.275 | 2.257 |       |       |       |       |                                                                                                                           |  |
|              |                                                                           | -10   | 2.258 | 2.257 |       |       |       |       |                                                                                                                           |  |
|              |                                                                           | 0     | 2.258 | 2.257 | 2.257 | 0.000 | 0.000 | 0.000 |                                                                                                                           |  |
|              |                                                                           | 10    | 2.437 | 2.365 | 2.257 | 0.092 | 0.011 | 0.005 |                                                                                                                           |  |
|              |                                                                           | 20    | 2.527 | 2.457 | 2.257 | 0.169 | 0.021 | 0.010 |                                                                                                                           |  |
|              |                                                                           | 30    | 2.596 | 2.536 | 2.257 | 0.234 | 0.031 | 0.014 |                                                                                                                           |  |
|              |                                                                           | 40    | 2.648 | 2.604 | 2.257 | 0.288 | 0.041 | 0.018 |                                                                                                                           |  |
|              |                                                                           | 50    | 2.693 | 2.663 | 2.257 | 0.334 | 0.051 | 0.022 |                                                                                                                           |  |
|              |                                                                           | 60    | 2.733 | 2.715 | 2.257 | 0.372 | 0.061 | 0.025 |                                                                                                                           |  |
|              |                                                                           | 70    | 2.764 | 2.759 | 2.257 | 0.404 | 0.070 | 0.028 |                                                                                                                           |  |
|              |                                                                           | 80    | 2.833 | 2.798 | 2.257 | 0.431 | 0.079 | 0.031 |                                                                                                                           |  |
|              |                                                                           | 90    | 2.849 | 2.833 | 2.257 | 0.453 | 0.088 | 0.034 |                                                                                                                           |  |
|              |                                                                           | 100   | 2.891 | 2.863 | 2.257 | 0.472 | 0.097 | 0.036 |                                                                                                                           |  |
|              |                                                                           | 110   | 2.912 | 2.890 | 2.257 | 0.488 | 0.105 | 0.039 |                                                                                                                           |  |
|              |                                                                           | 120   | 2.907 | 2.913 | 2.257 | 0.502 | 0.113 | 0.041 |                                                                                                                           |  |
|              |                                                                           | 130   | 2.949 | 2.935 | 2.257 | 0.513 | 0.122 | 0.043 |                                                                                                                           |  |
|              |                                                                           | 140   | 2.962 | 2.954 | 2.257 | 0.522 | 0.130 | 0.045 |                                                                                                                           |  |
|              |                                                                           | 150   | 2.999 | 2.972 | 2.257 | 0.530 | 0.137 | 0.047 |                                                                                                                           |  |
|              |                                                                           | 160   | 2.988 | 2.987 | 2.257 | 0.537 | 0.145 | 0.048 |                                                                                                                           |  |
| 170          | 3.010                                                                     | 3.002 | 2.257 | 0.543 | 0.152 | 0.050 |       |       |                                                                                                                           |  |
| 180          | 3.035                                                                     | 3.015 | 2.257 | 0.547 | 0.160 | 0.051 |       |       |                                                                                                                           |  |
| 190          | 3.059                                                                     | 3.028 | 2.257 | 0.551 | 0.167 | 0.052 |       |       |                                                                                                                           |  |
| 200          | 3.072                                                                     | 3.039 | 2.257 | 0.555 | 0.174 | 0.054 |       |       |                                                                                                                           |  |



|              |                        |     |       |       |       |       |       |       |                                           |   |   |   |                                           |       |       |       |                                           |
|--------------|------------------------|-----|-------|-------|-------|-------|-------|-------|-------------------------------------------|---|---|---|-------------------------------------------|-------|-------|-------|-------------------------------------------|
|              |                        | 210 | 3.046 | 3.050 | 2.257 | 0.557 | 0.181 | 0.055 |                                           |   |   |   |                                           |       |       |       |                                           |
|              |                        | 220 | 3.073 | 3.060 | 2.257 | 0.560 | 0.187 | 0.056 |                                           |   |   |   |                                           |       |       |       |                                           |
|              |                        | 230 | 3.091 | 3.069 | 2.257 | 0.562 | 0.194 | 0.057 |                                           |   |   |   |                                           |       |       |       |                                           |
|              |                        | 240 | 3.063 | 3.078 | 2.257 | 0.563 | 0.200 | 0.057 |                                           |   |   |   |                                           |       |       |       |                                           |
|              |                        | 250 | 3.100 | 3.086 | 2.257 | 0.565 | 0.206 | 0.058 |                                           |   |   |   |                                           |       |       |       |                                           |
|              |                        | 260 | 3.104 | 3.094 | 2.257 | 0.566 | 0.212 | 0.059 |                                           |   |   |   |                                           |       |       |       |                                           |
|              |                        | 270 | 3.090 | 3.102 | 2.257 | 0.567 | 0.218 | 0.060 |                                           |   |   |   |                                           |       |       |       |                                           |
|              |                        | 280 | 3.097 | 3.109 | 2.257 | 0.568 | 0.224 | 0.060 |                                           |   |   |   |                                           |       |       |       |                                           |
|              |                        | 290 | 3.130 | 3.116 | 2.257 | 0.568 | 0.230 | 0.061 |                                           |   |   |   |                                           |       |       |       |                                           |
|              |                        | 300 | 3.148 | 3.123 | 2.257 | 0.569 | 0.235 | 0.062 |                                           |   |   |   |                                           |       |       |       |                                           |
|              |                        | 310 | 3.135 | 3.129 | 2.257 | 0.569 | 0.241 | 0.062 |                                           |   |   |   |                                           |       |       |       |                                           |
|              |                        | 320 | 3.128 | 3.136 | 2.257 | 0.570 | 0.246 | 0.063 |                                           |   |   |   |                                           |       |       |       |                                           |
|              |                        | 330 | 3.143 | 3.142 | 2.257 | 0.570 | 0.251 | 0.063 |                                           |   |   |   |                                           |       |       |       |                                           |
|              |                        | 340 | 3.176 | 3.147 | 2.257 | 0.570 | 0.256 | 0.063 |                                           |   |   |   |                                           |       |       |       |                                           |
|              |                        | 350 | 3.165 | 3.153 | 2.257 | 0.571 | 0.261 | 0.064 |                                           |   |   |   |                                           |       |       |       |                                           |
|              |                        | 360 | 3.164 | 3.158 | 2.257 | 0.571 | 0.266 | 0.064 |                                           |   |   |   |                                           |       |       |       |                                           |
|              |                        | 370 | 3.169 | 3.164 | 2.257 | 0.571 | 0.271 | 0.064 |                                           |   |   |   |                                           |       |       |       |                                           |
|              |                        | 380 | 3.158 | 3.169 | 2.257 | 0.571 | 0.276 | 0.065 |                                           |   |   |   |                                           |       |       |       |                                           |
|              |                        | 390 | 3.155 | 3.174 | 2.257 | 0.571 | 0.280 | 0.065 |                                           |   |   |   |                                           |       |       |       |                                           |
|              |                        | 400 | 3.176 | 3.178 | 2.257 | 0.571 | 0.285 | 0.065 |                                           |   |   |   |                                           |       |       |       |                                           |
|              |                        | 410 | 3.178 | 3.183 | 2.257 | 0.571 | 0.289 | 0.066 |                                           |   |   |   |                                           |       |       |       |                                           |
|              |                        | 420 | 3.170 | 3.188 | 2.257 | 0.571 | 0.293 | 0.066 |                                           |   |   |   |                                           |       |       |       |                                           |
|              |                        | 430 | 3.187 | 3.192 | 2.257 | 0.571 | 0.297 | 0.066 |                                           |   |   |   |                                           |       |       |       |                                           |
|              |                        | 440 | 3.175 | 3.196 | 2.257 | 0.572 | 0.301 | 0.066 |                                           |   |   |   |                                           |       |       |       |                                           |
|              |                        | 450 | 3.188 | 3.201 | 2.257 | 0.572 | 0.305 | 0.066 |                                           |   |   |   |                                           |       |       |       |                                           |
|              |                        | 460 | 3.196 | 3.205 | 2.257 | 0.572 | 0.309 | 0.067 |                                           |   |   |   |                                           |       |       |       |                                           |
|              |                        | 470 | 3.181 | 3.209 | 2.257 | 0.572 | 0.313 | 0.067 |                                           |   |   |   |                                           |       |       |       |                                           |
|              |                        | 480 | 3.204 | 3.212 | 2.257 | 0.572 | 0.317 | 0.067 |                                           |   |   |   |                                           |       |       |       |                                           |
|              |                        | 490 | 3.192 | 3.216 | 2.257 | 0.572 | 0.320 | 0.067 |                                           |   |   |   |                                           |       |       |       |                                           |
|              |                        | 500 | 3.211 | 3.220 | 2.257 | 0.572 | 0.324 | 0.067 |                                           |   |   |   |                                           |       |       |       |                                           |
|              |                        | 510 | 3.221 | 3.223 | 2.257 | 0.572 | 0.327 | 0.067 |                                           |   |   |   |                                           |       |       |       |                                           |
|              |                        | 520 | 3.215 | 3.227 | 2.257 | 0.572 | 0.331 | 0.067 |                                           |   |   |   |                                           |       |       |       |                                           |
|              |                        | 530 | 3.200 | 3.230 | 2.257 | 0.572 | 0.334 | 0.067 |                                           |   |   |   |                                           |       |       |       |                                           |
|              |                        | 540 | 3.222 | 3.234 | 2.257 | 0.572 | 0.337 | 0.067 |                                           |   |   |   |                                           |       |       |       |                                           |
|              |                        | 550 | 3.207 | 3.237 | 2.257 | 0.572 | 0.341 | 0.068 |                                           |   |   |   |                                           |       |       |       |                                           |
|              |                        | 560 | 3.232 | 3.240 | 2.257 | 0.572 | 0.344 | 0.068 |                                           |   |   |   |                                           |       |       |       |                                           |
|              |                        | 570 | 3.235 | 3.243 | 2.257 | 0.572 | 0.347 | 0.068 |                                           |   |   |   |                                           |       |       |       |                                           |
|              |                        | 580 | 3.234 | 3.246 | 2.257 | 0.572 | 0.350 | 0.068 |                                           |   |   |   |                                           |       |       |       |                                           |
|              |                        | 590 | 3.243 | 3.249 | 2.257 | 0.572 | 0.352 | 0.068 |                                           |   |   |   |                                           |       |       |       |                                           |
|              |                        | 600 | 3.221 | 3.252 | 2.257 | 0.572 | 0.355 | 0.068 |                                           |   |   |   |                                           |       |       |       |                                           |
| GFET<br>#M54 | $c^{(CEA)} = 50$<br>nM | -50 | 2.294 | 2.272 | -     | -     | -     | -     | $\tilde{c}^{(CEA)} \approx$<br>48.3227 nM |   |   |   |                                           |       |       |       |                                           |
|              |                        | -40 | 2.258 | 2.272 |       |       |       |       |                                           |   |   |   |                                           |       |       |       |                                           |
|              | $c^{(AFP)} = 20$<br>nM | -30 | 2.267 | 2.272 |       |       |       |       | -                                         | - | - | - | $\tilde{c}^{(AFP)} \approx$<br>13.2165 nM |       |       |       |                                           |
|              |                        | -20 | 2.275 | 2.272 |       |       |       |       |                                           |   |   |   |                                           |       |       |       |                                           |
|              | $c^{(PTH)} = 5$<br>nM  | -10 | 2.268 | 2.272 |       |       |       |       |                                           |   |   |   | 2.272                                     | 0.000 | 0.000 | 0.000 | $\tilde{c}^{(PTH)} \approx$<br>10.0443 nM |
|              |                        | 0   | 2.268 | 2.272 |       |       |       |       |                                           |   |   |   |                                           |       |       |       |                                           |

|     |       |       |       |       |       |       |
|-----|-------|-------|-------|-------|-------|-------|
| 10  | 2.478 | 2.381 | 2.272 | 0.089 | 0.010 | 0.011 |
| 20  | 2.549 | 2.475 | 2.272 | 0.163 | 0.020 | 0.020 |
| 30  | 2.582 | 2.555 | 2.272 | 0.226 | 0.030 | 0.028 |
| 40  | 2.662 | 2.624 | 2.272 | 0.278 | 0.039 | 0.036 |
| 50  | 2.711 | 2.684 | 2.272 | 0.322 | 0.048 | 0.042 |
| 60  | 2.750 | 2.735 | 2.272 | 0.359 | 0.057 | 0.048 |
| 70  | 2.766 | 2.780 | 2.272 | 0.390 | 0.066 | 0.053 |
| 80  | 2.849 | 2.819 | 2.272 | 0.416 | 0.075 | 0.057 |
| 90  | 2.857 | 2.853 | 2.272 | 0.437 | 0.083 | 0.061 |
| 100 | 2.923 | 2.883 | 2.272 | 0.456 | 0.091 | 0.064 |
| 110 | 2.915 | 2.909 | 2.272 | 0.471 | 0.099 | 0.067 |
| 120 | 2.933 | 2.933 | 2.272 | 0.484 | 0.107 | 0.070 |
| 130 | 2.959 | 2.954 | 2.272 | 0.495 | 0.115 | 0.072 |
| 140 | 2.967 | 2.972 | 2.272 | 0.504 | 0.123 | 0.074 |
| 150 | 3.011 | 2.989 | 2.272 | 0.511 | 0.130 | 0.076 |
| 160 | 3.002 | 3.004 | 2.272 | 0.518 | 0.137 | 0.078 |
| 170 | 3.035 | 3.018 | 2.272 | 0.523 | 0.144 | 0.079 |
| 180 | 3.033 | 3.031 | 2.272 | 0.527 | 0.151 | 0.080 |
| 190 | 3.043 | 3.042 | 2.272 | 0.531 | 0.158 | 0.082 |
| 200 | 3.056 | 3.053 | 2.272 | 0.534 | 0.165 | 0.083 |
| 210 | 3.062 | 3.063 | 2.272 | 0.537 | 0.171 | 0.083 |
| 220 | 3.077 | 3.073 | 2.272 | 0.539 | 0.178 | 0.084 |
| 230 | 3.073 | 3.081 | 2.272 | 0.541 | 0.184 | 0.085 |
| 240 | 3.098 | 3.090 | 2.272 | 0.543 | 0.190 | 0.085 |
| 250 | 3.110 | 3.097 | 2.272 | 0.544 | 0.196 | 0.086 |
| 260 | 3.084 | 3.105 | 2.272 | 0.545 | 0.202 | 0.086 |
| 270 | 3.102 | 3.112 | 2.272 | 0.546 | 0.207 | 0.087 |
| 280 | 3.134 | 3.118 | 2.272 | 0.547 | 0.213 | 0.087 |
| 290 | 3.120 | 3.125 | 2.272 | 0.547 | 0.218 | 0.087 |
| 300 | 3.130 | 3.131 | 2.272 | 0.548 | 0.224 | 0.088 |
| 310 | 3.152 | 3.137 | 2.272 | 0.548 | 0.229 | 0.088 |
| 320 | 3.146 | 3.143 | 2.272 | 0.549 | 0.234 | 0.088 |
| 330 | 3.142 | 3.148 | 2.272 | 0.549 | 0.239 | 0.088 |
| 340 | 3.144 | 3.153 | 2.272 | 0.549 | 0.244 | 0.088 |
| 350 | 3.148 | 3.159 | 2.272 | 0.550 | 0.249 | 0.089 |
| 360 | 3.145 | 3.164 | 2.272 | 0.550 | 0.253 | 0.089 |
| 370 | 3.150 | 3.168 | 2.272 | 0.550 | 0.258 | 0.089 |
| 380 | 3.145 | 3.173 | 2.272 | 0.550 | 0.262 | 0.089 |
| 390 | 3.155 | 3.178 | 2.272 | 0.550 | 0.267 | 0.089 |
| 400 | 3.166 | 3.182 | 2.272 | 0.550 | 0.271 | 0.089 |
| 410 | 3.194 | 3.186 | 2.272 | 0.550 | 0.275 | 0.089 |
| 420 | 3.174 | 3.191 | 2.272 | 0.550 | 0.279 | 0.089 |
| 430 | 3.167 | 3.195 | 2.272 | 0.551 | 0.283 | 0.089 |
| 440 | 3.183 | 3.199 | 2.272 | 0.551 | 0.287 | 0.089 |
| 450 | 3.196 | 3.203 | 2.272 | 0.551 | 0.291 | 0.089 |
| 460 | 3.191 | 3.207 | 2.272 | 0.551 | 0.295 | 0.089 |

|              |                        |       |       |       |       |       |       |                                      |                                      |
|--------------|------------------------|-------|-------|-------|-------|-------|-------|--------------------------------------|--------------------------------------|
|              |                        | 470   | 3.186 | 3.210 | 2.272 | 0.551 | 0.299 | 0.089                                |                                      |
|              |                        | 480   | 3.202 | 3.214 | 2.272 | 0.551 | 0.302 | 0.089                                |                                      |
|              |                        | 490   | 3.212 | 3.217 | 2.272 | 0.551 | 0.306 | 0.090                                |                                      |
|              |                        | 500   | 3.210 | 3.221 | 2.272 | 0.551 | 0.309 | 0.090                                |                                      |
|              |                        | 510   | 3.228 | 3.224 | 2.272 | 0.551 | 0.312 | 0.090                                |                                      |
|              |                        | 520   | 3.201 | 3.228 | 2.272 | 0.551 | 0.316 | 0.090                                |                                      |
|              |                        | 530   | 3.216 | 3.231 | 2.272 | 0.551 | 0.319 | 0.090                                |                                      |
|              |                        | 540   | 3.229 | 3.234 | 2.272 | 0.551 | 0.322 | 0.090                                |                                      |
|              |                        | 550   | 3.228 | 3.237 | 2.272 | 0.551 | 0.325 | 0.090                                |                                      |
|              |                        | 560   | 3.236 | 3.240 | 2.272 | 0.551 | 0.328 | 0.090                                |                                      |
|              |                        | 570   | 3.225 | 3.243 | 2.272 | 0.551 | 0.331 | 0.090                                |                                      |
|              |                        | 580   | 3.213 | 3.246 | 2.272 | 0.551 | 0.334 | 0.090                                |                                      |
|              |                        | 590   | 3.250 | 3.249 | 2.272 | 0.551 | 0.337 | 0.090                                |                                      |
|              |                        | 600   | 3.242 | 3.252 | 2.272 | 0.551 | 0.340 | 0.090                                |                                      |
| GFET<br>#M55 | $c^{(CEA)} = 50$<br>nM | -50   | 2.262 | 2.266 | -     | -     | -     | -                                    | $\bar{c}^{(CEA)} \approx 50.2117$ nM |
|              |                        | -40   | 2.268 | 2.266 |       |       |       |                                      |                                      |
|              |                        | -30   | 2.274 | 2.266 |       |       |       |                                      |                                      |
|              |                        | -20   | 2.283 | 2.266 |       |       |       |                                      |                                      |
|              |                        | -10   | 2.255 | 2.266 |       |       |       |                                      |                                      |
|              | 0                      | 2.255 | 2.266 | 2.266 | 0.000 | 0.000 | 0.000 |                                      |                                      |
|              | 10                     | 2.463 | 2.406 | 2.266 | 0.094 | 0.010 | 0.036 |                                      |                                      |
|              | 20                     | 2.552 | 2.517 | 2.266 | 0.172 | 0.020 | 0.059 |                                      |                                      |
|              | 30                     | 2.614 | 2.607 | 2.266 | 0.238 | 0.029 | 0.074 |                                      |                                      |
|              | 40                     | 2.669 | 2.681 | 2.266 | 0.292 | 0.039 | 0.084 |                                      |                                      |
|              | 50                     | 2.739 | 2.742 | 2.266 | 0.337 | 0.048 | 0.090 |                                      |                                      |
|              | 60                     | 2.783 | 2.792 | 2.266 | 0.375 | 0.057 | 0.094 |                                      |                                      |
|              | 70                     | 2.798 | 2.835 | 2.266 | 0.407 | 0.066 | 0.097 |                                      |                                      |
|              | 80                     | 2.872 | 2.872 | 2.266 | 0.433 | 0.074 | 0.098 |                                      |                                      |
|              | 90                     | 2.893 | 2.903 | 2.266 | 0.455 | 0.083 | 0.099 |                                      |                                      |
|              | 100                    | 2.914 | 2.930 | 2.266 | 0.473 | 0.091 | 0.100 | $\bar{c}^{(AFP)} \approx 13.1432$ nM |                                      |
|              | 110                    | 2.978 | 2.954 | 2.266 | 0.488 | 0.099 | 0.101 |                                      |                                      |
|              | 120                    | 3.007 | 2.975 | 2.266 | 0.501 | 0.107 | 0.101 | $\bar{c}^{(PTH)} \approx 40.4624$ nM |                                      |
|              | 130                    | 2.979 | 2.993 | 2.266 | 0.511 | 0.114 | 0.101 |                                      |                                      |
|              | 140                    | 2.981 | 3.009 | 2.266 | 0.520 | 0.122 | 0.101 |                                      |                                      |
|              | 150                    | 3.019 | 3.024 | 2.266 | 0.528 | 0.129 | 0.101 |                                      |                                      |
|              | 160                    | 3.018 | 3.038 | 2.266 | 0.534 | 0.136 | 0.101 |                                      |                                      |
|              | 170                    | 3.054 | 3.050 | 2.266 | 0.539 | 0.143 | 0.101 |                                      |                                      |
|              | 180                    | 3.049 | 3.061 | 2.266 | 0.543 | 0.150 | 0.101 |                                      |                                      |
|              | 190                    | 3.076 | 3.071 | 2.266 | 0.547 | 0.157 | 0.101 |                                      |                                      |
|              | 200                    | 3.081 | 3.081 | 2.266 | 0.550 | 0.164 | 0.101 |                                      |                                      |
| 210          | 3.082                  | 3.090 | 2.266 | 0.552 | 0.170 | 0.101 |       |                                      |                                      |
| 220          | 3.113                  | 3.098 | 2.266 | 0.554 | 0.176 | 0.101 |       |                                      |                                      |
| 230          | 3.107                  | 3.106 | 2.266 | 0.556 | 0.183 | 0.101 |       |                                      |                                      |
| 240          | 3.093                  | 3.113 | 2.266 | 0.557 | 0.189 | 0.101 |       |                                      |                                      |
| 250          | 3.120                  | 3.121 | 2.266 | 0.558 | 0.195 | 0.101 |       |                                      |                                      |
| 260          | 3.143                  | 3.127 | 2.266 | 0.559 | 0.200 | 0.101 |       |                                      |                                      |

|              |                        |     |       |       |       |       |       |       |                                         |
|--------------|------------------------|-----|-------|-------|-------|-------|-------|-------|-----------------------------------------|
|              |                        | 270 | 3.135 | 3.134 | 2.266 | 0.560 | 0.206 | 0.101 |                                         |
|              |                        | 280 | 3.159 | 3.140 | 2.266 | 0.561 | 0.212 | 0.101 |                                         |
|              |                        | 290 | 3.163 | 3.146 | 2.266 | 0.561 | 0.217 | 0.101 |                                         |
|              |                        | 300 | 3.132 | 3.152 | 2.266 | 0.562 | 0.222 | 0.101 |                                         |
|              |                        | 310 | 3.161 | 3.157 | 2.266 | 0.562 | 0.228 | 0.101 |                                         |
|              |                        | 320 | 3.148 | 3.163 | 2.266 | 0.563 | 0.233 | 0.101 |                                         |
|              |                        | 330 | 3.162 | 3.168 | 2.266 | 0.563 | 0.238 | 0.101 |                                         |
|              |                        | 340 | 3.164 | 3.173 | 2.266 | 0.563 | 0.242 | 0.101 |                                         |
|              |                        | 350 | 3.157 | 3.178 | 2.266 | 0.563 | 0.247 | 0.101 |                                         |
|              |                        | 360 | 3.176 | 3.183 | 2.266 | 0.563 | 0.252 | 0.101 |                                         |
|              |                        | 370 | 3.174 | 3.188 | 2.266 | 0.564 | 0.256 | 0.101 |                                         |
|              |                        | 380 | 3.174 | 3.192 | 2.266 | 0.564 | 0.261 | 0.101 |                                         |
|              |                        | 390 | 3.192 | 3.197 | 2.266 | 0.564 | 0.265 | 0.101 |                                         |
|              |                        | 400 | 3.180 | 3.201 | 2.266 | 0.564 | 0.269 | 0.101 |                                         |
|              |                        | 410 | 3.191 | 3.205 | 2.266 | 0.564 | 0.274 | 0.101 |                                         |
|              |                        | 420 | 3.192 | 3.209 | 2.266 | 0.564 | 0.278 | 0.101 |                                         |
|              |                        | 430 | 3.206 | 3.213 | 2.266 | 0.564 | 0.282 | 0.101 |                                         |
|              |                        | 440 | 3.193 | 3.217 | 2.266 | 0.564 | 0.286 | 0.101 |                                         |
|              |                        | 450 | 3.203 | 3.221 | 2.266 | 0.564 | 0.289 | 0.101 |                                         |
|              |                        | 460 | 3.211 | 3.225 | 2.266 | 0.564 | 0.293 | 0.101 |                                         |
|              |                        | 470 | 3.233 | 3.229 | 2.266 | 0.564 | 0.297 | 0.101 |                                         |
|              |                        | 480 | 3.211 | 3.232 | 2.266 | 0.564 | 0.300 | 0.101 |                                         |
|              |                        | 490 | 3.207 | 3.236 | 2.266 | 0.564 | 0.304 | 0.101 |                                         |
|              |                        | 500 | 3.204 | 3.239 | 2.266 | 0.564 | 0.307 | 0.101 |                                         |
|              |                        | 510 | 3.267 | 3.242 | 2.266 | 0.564 | 0.311 | 0.101 |                                         |
|              |                        | 520 | 3.247 | 3.246 | 2.266 | 0.564 | 0.314 | 0.101 |                                         |
|              |                        | 530 | 3.223 | 3.249 | 2.266 | 0.564 | 0.317 | 0.101 |                                         |
|              |                        | 540 | 3.246 | 3.252 | 2.266 | 0.564 | 0.320 | 0.101 |                                         |
|              |                        | 550 | 3.242 | 3.255 | 2.266 | 0.564 | 0.323 | 0.101 |                                         |
|              |                        | 560 | 3.233 | 3.258 | 2.266 | 0.564 | 0.326 | 0.101 |                                         |
|              |                        | 570 | 3.257 | 3.261 | 2.266 | 0.564 | 0.329 | 0.101 |                                         |
|              |                        | 580 | 3.254 | 3.264 | 2.266 | 0.564 | 0.332 | 0.101 |                                         |
|              |                        | 590 | 3.225 | 3.267 | 2.266 | 0.564 | 0.335 | 0.101 |                                         |
|              |                        | 600 | 3.226 | 3.270 | 2.266 | 0.564 | 0.338 | 0.101 |                                         |
| GFET<br>#M56 | $c^{(CEA)} = 50$<br>nM | -50 | 2.265 | 2.264 | -     | -     | -     | -     | $\bar{c}^{(CEA)} \approx$<br>49.2544 nM |
|              |                        | -40 | 2.281 | 2.264 |       |       |       |       |                                         |
|              |                        | -30 | 2.265 | 2.264 |       |       |       |       |                                         |
|              |                        | -20 | 2.261 | 2.264 |       |       |       |       |                                         |
|              |                        | -10 | 2.257 | 2.264 |       |       |       |       |                                         |
|              | $c^{(AFP)} = 20$<br>nM | 0   | 2.257 | 2.264 | 2.264 | 0.000 | 0.000 | 0.000 | $\bar{c}^{(AFP)} \approx$<br>13.1244 nM |
|              |                        | 10  | 2.462 | 2.432 | 2.264 | 0.094 | 0.009 | 0.064 |                                         |
|              |                        | 20  | 2.596 | 2.543 | 2.264 | 0.172 | 0.019 | 0.088 |                                         |
|              | $c^{(PTH)} = 50$<br>nM | 30  | 2.644 | 2.626 | 2.264 | 0.238 | 0.028 | 0.096 | $\bar{c}^{(PTH)} \approx$<br>96.4788 nM |
|              |                        | 40  | 2.712 | 2.693 | 2.264 | 0.292 | 0.037 | 0.099 |                                         |
|              |                        | 50  | 2.776 | 2.748 | 2.264 | 0.338 | 0.045 | 0.101 |                                         |
|              |                        | 60  | 2.782 | 2.796 | 2.264 | 0.376 | 0.054 | 0.101 |                                         |

|     |       |       |       |       |       |       |
|-----|-------|-------|-------|-------|-------|-------|
| 70  | 2.833 | 2.836 | 2.264 | 0.408 | 0.062 | 0.101 |
| 80  | 2.876 | 2.871 | 2.264 | 0.435 | 0.070 | 0.101 |
| 90  | 2.916 | 2.901 | 2.264 | 0.458 | 0.078 | 0.101 |
| 100 | 2.947 | 2.928 | 2.264 | 0.476 | 0.086 | 0.101 |
| 110 | 2.943 | 2.951 | 2.264 | 0.492 | 0.094 | 0.101 |
| 120 | 2.970 | 2.972 | 2.264 | 0.505 | 0.101 | 0.101 |
| 130 | 3.017 | 2.990 | 2.264 | 0.516 | 0.109 | 0.101 |
| 140 | 3.013 | 3.006 | 2.264 | 0.525 | 0.116 | 0.101 |
| 150 | 3.014 | 3.021 | 2.264 | 0.533 | 0.123 | 0.101 |
| 160 | 3.039 | 3.034 | 2.264 | 0.539 | 0.130 | 0.101 |
| 170 | 3.063 | 3.046 | 2.264 | 0.545 | 0.136 | 0.101 |
| 180 | 3.073 | 3.057 | 2.264 | 0.549 | 0.143 | 0.101 |
| 190 | 3.076 | 3.068 | 2.264 | 0.553 | 0.149 | 0.101 |
| 200 | 3.089 | 3.077 | 2.264 | 0.556 | 0.156 | 0.101 |
| 210 | 3.091 | 3.086 | 2.264 | 0.559 | 0.162 | 0.101 |
| 220 | 3.109 | 3.094 | 2.264 | 0.561 | 0.168 | 0.101 |
| 230 | 3.118 | 3.102 | 2.264 | 0.563 | 0.174 | 0.101 |
| 240 | 3.125 | 3.109 | 2.264 | 0.564 | 0.179 | 0.101 |
| 250 | 3.119 | 3.116 | 2.264 | 0.565 | 0.185 | 0.101 |
| 260 | 3.117 | 3.122 | 2.264 | 0.566 | 0.190 | 0.101 |
| 270 | 3.155 | 3.129 | 2.264 | 0.567 | 0.196 | 0.101 |
| 280 | 3.133 | 3.135 | 2.264 | 0.568 | 0.201 | 0.101 |
| 290 | 3.151 | 3.140 | 2.264 | 0.569 | 0.206 | 0.101 |
| 300 | 3.156 | 3.146 | 2.264 | 0.569 | 0.211 | 0.101 |
| 310 | 3.167 | 3.151 | 2.264 | 0.570 | 0.216 | 0.101 |
| 320 | 3.156 | 3.157 | 2.264 | 0.570 | 0.221 | 0.101 |
| 330 | 3.176 | 3.162 | 2.264 | 0.570 | 0.226 | 0.101 |
| 340 | 3.158 | 3.166 | 2.264 | 0.571 | 0.230 | 0.101 |
| 350 | 3.176 | 3.171 | 2.264 | 0.571 | 0.235 | 0.101 |
| 360 | 3.183 | 3.176 | 2.264 | 0.571 | 0.239 | 0.101 |
| 370 | 3.160 | 3.180 | 2.264 | 0.571 | 0.244 | 0.101 |
| 380 | 3.187 | 3.185 | 2.264 | 0.571 | 0.248 | 0.101 |
| 390 | 3.196 | 3.189 | 2.264 | 0.571 | 0.252 | 0.101 |
| 400 | 3.197 | 3.193 | 2.264 | 0.571 | 0.256 | 0.101 |
| 410 | 3.193 | 3.197 | 2.264 | 0.571 | 0.260 | 0.101 |
| 420 | 3.212 | 3.201 | 2.264 | 0.572 | 0.264 | 0.101 |
| 430 | 3.202 | 3.205 | 2.264 | 0.572 | 0.268 | 0.101 |
| 440 | 3.181 | 3.209 | 2.264 | 0.572 | 0.272 | 0.101 |
| 450 | 3.170 | 3.212 | 2.264 | 0.572 | 0.275 | 0.101 |
| 460 | 3.197 | 3.216 | 2.264 | 0.572 | 0.279 | 0.101 |
| 470 | 3.202 | 3.219 | 2.264 | 0.572 | 0.282 | 0.101 |
| 480 | 3.208 | 3.223 | 2.264 | 0.572 | 0.286 | 0.101 |
| 490 | 3.214 | 3.226 | 2.264 | 0.572 | 0.289 | 0.101 |
| 500 | 3.229 | 3.229 | 2.264 | 0.572 | 0.292 | 0.101 |
| 510 | 3.218 | 3.233 | 2.264 | 0.572 | 0.295 | 0.101 |
| 520 | 3.189 | 3.236 | 2.264 | 0.572 | 0.299 | 0.101 |

|              |                                                                           |       |       |       |       |       |       |       |                                                                                                                              |
|--------------|---------------------------------------------------------------------------|-------|-------|-------|-------|-------|-------|-------|------------------------------------------------------------------------------------------------------------------------------|
|              |                                                                           | 530   | 3.232 | 3.239 | 2.264 | 0.572 | 0.302 | 0.101 |                                                                                                                              |
|              |                                                                           | 540   | 3.243 | 3.242 | 2.264 | 0.572 | 0.305 | 0.101 |                                                                                                                              |
|              |                                                                           | 550   | 3.236 | 3.245 | 2.264 | 0.572 | 0.308 | 0.101 |                                                                                                                              |
|              |                                                                           | 560   | 3.228 | 3.248 | 2.264 | 0.572 | 0.310 | 0.101 |                                                                                                                              |
|              |                                                                           | 570   | 3.263 | 3.250 | 2.264 | 0.572 | 0.313 | 0.101 |                                                                                                                              |
|              |                                                                           | 580   | 3.231 | 3.253 | 2.264 | 0.572 | 0.316 | 0.101 |                                                                                                                              |
|              |                                                                           | 590   | 3.243 | 3.256 | 2.264 | 0.572 | 0.319 | 0.101 |                                                                                                                              |
|              |                                                                           | 600   | 3.227 | 3.259 | 2.264 | 0.572 | 0.321 | 0.101 |                                                                                                                              |
| GFET<br>#M57 | $c^{(CEA)} = 50$<br>nM<br>$c^{(AFP)} = 50$<br>nM<br>$c^{(PTH)} = 2$<br>nM | -50   | 2.278 | 2.274 | -     | -     | -     | -     | $\bar{c}^{(CEA)} \approx$<br>55.1533 nM<br>$\bar{c}^{(AFP)} \approx$<br>33.2756 nM<br>$\bar{c}^{(PTH)} \approx$<br>7.1163 nM |
|              |                                                                           | -40   | 2.263 | 2.274 |       |       |       |       |                                                                                                                              |
|              |                                                                           | -30   | 2.282 | 2.274 |       |       |       |       |                                                                                                                              |
|              |                                                                           | -20   | 2.265 | 2.274 |       |       |       |       |                                                                                                                              |
|              |                                                                           | -10   | 2.279 | 2.274 |       |       |       |       |                                                                                                                              |
|              |                                                                           | 0     | 2.279 | 2.274 | 2.274 | 0.000 | 0.000 | 0.000 |                                                                                                                              |
|              |                                                                           | 10    | 2.467 | 2.395 | 2.274 | 0.091 | 0.025 | 0.005 |                                                                                                                              |
|              |                                                                           | 20    | 2.576 | 2.497 | 2.274 | 0.165 | 0.048 | 0.010 |                                                                                                                              |
|              |                                                                           | 30    | 2.662 | 2.585 | 2.274 | 0.225 | 0.071 | 0.015 |                                                                                                                              |
|              |                                                                           | 40    | 2.735 | 2.660 | 2.274 | 0.275 | 0.092 | 0.019 |                                                                                                                              |
|              |                                                                           | 50    | 2.760 | 2.725 | 2.274 | 0.316 | 0.113 | 0.022 |                                                                                                                              |
|              |                                                                           | 60    | 2.808 | 2.782 | 2.274 | 0.349 | 0.133 | 0.026 |                                                                                                                              |
|              |                                                                           | 70    | 2.864 | 2.831 | 2.274 | 0.376 | 0.152 | 0.029 |                                                                                                                              |
|              |                                                                           | 80    | 2.902 | 2.874 | 2.274 | 0.399 | 0.170 | 0.031 |                                                                                                                              |
|              |                                                                           | 90    | 2.952 | 2.913 | 2.274 | 0.417 | 0.188 | 0.034 |                                                                                                                              |
|              |                                                                           | 100   | 2.982 | 2.947 | 2.274 | 0.432 | 0.205 | 0.036 |                                                                                                                              |
|              |                                                                           | 110   | 3.006 | 2.977 | 2.274 | 0.444 | 0.221 | 0.038 |                                                                                                                              |
|              |                                                                           | 120   | 2.993 | 3.004 | 2.274 | 0.454 | 0.236 | 0.040 |                                                                                                                              |
|              |                                                                           | 130   | 3.052 | 3.029 | 2.274 | 0.462 | 0.251 | 0.042 |                                                                                                                              |
|              |                                                                           | 140   | 3.078 | 3.052 | 2.274 | 0.469 | 0.265 | 0.043 |                                                                                                                              |
|              |                                                                           | 150   | 3.099 | 3.072 | 2.274 | 0.475 | 0.279 | 0.045 |                                                                                                                              |
|              |                                                                           | 160   | 3.070 | 3.091 | 2.274 | 0.479 | 0.292 | 0.046 |                                                                                                                              |
|              |                                                                           | 170   | 3.105 | 3.108 | 2.274 | 0.483 | 0.304 | 0.047 |                                                                                                                              |
|              |                                                                           | 180   | 3.125 | 3.125 | 2.274 | 0.486 | 0.316 | 0.048 |                                                                                                                              |
|              |                                                                           | 190   | 3.129 | 3.140 | 2.274 | 0.488 | 0.328 | 0.049 |                                                                                                                              |
|              |                                                                           | 200   | 3.147 | 3.153 | 2.274 | 0.490 | 0.339 | 0.050 |                                                                                                                              |
|              |                                                                           | 210   | 3.149 | 3.167 | 2.274 | 0.492 | 0.350 | 0.051 |                                                                                                                              |
|              |                                                                           | 220   | 3.186 | 3.179 | 2.274 | 0.493 | 0.360 | 0.051 |                                                                                                                              |
|              |                                                                           | 230   | 3.195 | 3.190 | 2.274 | 0.494 | 0.370 | 0.052 |                                                                                                                              |
|              |                                                                           | 240   | 3.207 | 3.201 | 2.274 | 0.495 | 0.379 | 0.052 |                                                                                                                              |
|              |                                                                           | 250   | 3.192 | 3.211 | 2.274 | 0.496 | 0.388 | 0.053 |                                                                                                                              |
|              |                                                                           | 260   | 3.231 | 3.221 | 2.274 | 0.497 | 0.397 | 0.053 |                                                                                                                              |
| 270          | 3.234                                                                     | 3.230 | 2.274 | 0.497 | 0.405 | 0.054 |       |       |                                                                                                                              |
| 280          | 3.214                                                                     | 3.239 | 2.274 | 0.498 | 0.413 | 0.054 |       |       |                                                                                                                              |
| 290          | 3.230                                                                     | 3.247 | 2.274 | 0.498 | 0.420 | 0.055 |       |       |                                                                                                                              |
| 300          | 3.254                                                                     | 3.255 | 2.274 | 0.498 | 0.428 | 0.055 |       |       |                                                                                                                              |
| 310          | 3.258                                                                     | 3.263 | 2.274 | 0.498 | 0.435 | 0.055 |       |       |                                                                                                                              |
| 320          | 3.238                                                                     | 3.270 | 2.274 | 0.499 | 0.441 | 0.056 |       |       |                                                                                                                              |

|              |                        |       |       |       |       |       |       |                                         |                                         |
|--------------|------------------------|-------|-------|-------|-------|-------|-------|-----------------------------------------|-----------------------------------------|
|              |                        | 330   | 3.279 | 3.277 | 2.274 | 0.499 | 0.448 | 0.056                                   |                                         |
|              |                        | 340   | 3.283 | 3.283 | 2.274 | 0.499 | 0.454 | 0.056                                   |                                         |
|              |                        | 350   | 3.271 | 3.289 | 2.274 | 0.499 | 0.460 | 0.056                                   |                                         |
|              |                        | 360   | 3.276 | 3.295 | 2.274 | 0.499 | 0.465 | 0.056                                   |                                         |
|              |                        | 370   | 3.286 | 3.301 | 2.274 | 0.499 | 0.471 | 0.057                                   |                                         |
|              |                        | 380   | 3.299 | 3.306 | 2.274 | 0.499 | 0.476 | 0.057                                   |                                         |
|              |                        | 390   | 3.320 | 3.312 | 2.274 | 0.499 | 0.481 | 0.057                                   |                                         |
|              |                        | 400   | 3.284 | 3.317 | 2.274 | 0.499 | 0.486 | 0.057                                   |                                         |
|              |                        | 410   | 3.271 | 3.321 | 2.274 | 0.499 | 0.491 | 0.057                                   |                                         |
|              |                        | 420   | 3.268 | 3.326 | 2.274 | 0.499 | 0.495 | 0.057                                   |                                         |
|              |                        | 430   | 3.291 | 3.330 | 2.274 | 0.499 | 0.499 | 0.057                                   |                                         |
|              |                        | 440   | 3.339 | 3.334 | 2.274 | 0.499 | 0.503 | 0.057                                   |                                         |
|              |                        | 450   | 3.348 | 3.338 | 2.274 | 0.499 | 0.507 | 0.057                                   |                                         |
|              |                        | 460   | 3.313 | 3.342 | 2.274 | 0.499 | 0.511 | 0.058                                   |                                         |
|              |                        | 470   | 3.354 | 3.346 | 2.274 | 0.499 | 0.514 | 0.058                                   |                                         |
|              |                        | 480   | 3.342 | 3.349 | 2.274 | 0.499 | 0.518 | 0.058                                   |                                         |
|              |                        | 490   | 3.316 | 3.353 | 2.274 | 0.499 | 0.521 | 0.058                                   |                                         |
|              |                        | 500   | 3.325 | 3.356 | 2.274 | 0.499 | 0.524 | 0.058                                   |                                         |
|              |                        | 510   | 3.318 | 3.359 | 2.274 | 0.499 | 0.527 | 0.058                                   |                                         |
|              |                        | 520   | 3.348 | 3.362 | 2.274 | 0.499 | 0.530 | 0.058                                   |                                         |
|              |                        | 530   | 3.349 | 3.365 | 2.274 | 0.499 | 0.533 | 0.058                                   |                                         |
|              |                        | 540   | 3.341 | 3.367 | 2.274 | 0.499 | 0.536 | 0.058                                   |                                         |
|              |                        | 550   | 3.349 | 3.370 | 2.274 | 0.499 | 0.538 | 0.058                                   |                                         |
|              |                        | 560   | 3.362 | 3.372 | 2.274 | 0.499 | 0.541 | 0.058                                   |                                         |
|              |                        | 570   | 3.370 | 3.375 | 2.274 | 0.499 | 0.543 | 0.058                                   |                                         |
|              |                        | 580   | 3.351 | 3.377 | 2.274 | 0.499 | 0.545 | 0.058                                   |                                         |
|              |                        | 590   | 3.365 | 3.379 | 2.274 | 0.499 | 0.547 | 0.058                                   |                                         |
|              |                        | 600   | 3.359 | 3.381 | 2.274 | 0.499 | 0.549 | 0.058                                   |                                         |
| GFET<br>#M58 | $c^{(CEA)} = 50$<br>nM | -50   | 2.287 | 2.272 | -     | -     | -     | -                                       | $\bar{c}^{(CEA)} \approx$<br>55.1224 nM |
|              |                        | -40   | 2.252 | 2.272 |       |       |       |                                         |                                         |
|              |                        | -30   | 2.282 | 2.272 |       |       |       |                                         |                                         |
|              |                        | -20   | 2.271 | 2.272 |       |       |       |                                         |                                         |
|              |                        | -10   | 2.269 | 2.272 |       |       |       |                                         |                                         |
|              | 0                      | 2.269 | 2.272 | 2.272 | 0.000 | 0.000 | 0.000 |                                         |                                         |
|              | $c^{(AFP)} = 50$<br>nM | 10    | 2.492 | 2.389 | 2.272 | 0.084 | 0.026 | 0.008                                   |                                         |
|              |                        | 20    | 2.576 | 2.490 | 2.272 | 0.152 | 0.050 | 0.016                                   |                                         |
|              |                        | 30    | 2.637 | 2.576 | 2.272 | 0.208 | 0.074 | 0.022                                   |                                         |
|              | $c^{(PTH)} = 5$<br>nM  | 40    | 2.731 | 2.651 | 2.272 | 0.254 | 0.097 | 0.028                                   |                                         |
|              |                        | 50    | 2.764 | 2.716 | 2.272 | 0.292 | 0.118 | 0.034                                   |                                         |
|              |                        | 60    | 2.820 | 2.772 | 2.272 | 0.323 | 0.139 | 0.039                                   |                                         |
|              |                        | 70    | 2.860 | 2.822 | 2.272 | 0.348 | 0.159 | 0.043                                   |                                         |
|              |                        | 80    | 2.882 | 2.865 | 2.272 | 0.369 | 0.178 | 0.047                                   |                                         |
|              |                        | 90    | 2.930 | 2.904 | 2.272 | 0.386 | 0.196 | 0.050                                   |                                         |
|              |                        |       | 100   | 2.949 | 2.939 | 2.272 | 0.399 | 0.214                                   |                                         |
|              |                        | 110   | 2.999 | 2.970 | 2.272 | 0.411 | 0.231 | 0.056                                   |                                         |
|              |                        | 120   | 3.007 | 2.997 | 2.272 | 0.420 | 0.247 | 0.059                                   |                                         |
|              |                        |       |       |       |       |       |       | $\bar{c}^{(AFP)} \approx$<br>34.2322 nM |                                         |
|              |                        |       |       |       |       |       |       | $\bar{c}^{(PTH)} \approx$<br>8.2122 nM  |                                         |

|     |       |       |       |       |       |       |
|-----|-------|-------|-------|-------|-------|-------|
| 130 | 3.038 | 3.023 | 2.272 | 0.428 | 0.262 | 0.061 |
| 140 | 3.052 | 3.046 | 2.272 | 0.434 | 0.277 | 0.063 |
| 150 | 3.070 | 3.067 | 2.272 | 0.439 | 0.291 | 0.065 |
| 160 | 3.114 | 3.086 | 2.272 | 0.443 | 0.305 | 0.067 |
| 170 | 3.112 | 3.104 | 2.272 | 0.447 | 0.318 | 0.068 |
| 180 | 3.132 | 3.121 | 2.272 | 0.449 | 0.330 | 0.070 |
| 190 | 3.145 | 3.136 | 2.272 | 0.452 | 0.342 | 0.071 |
| 200 | 3.164 | 3.150 | 2.272 | 0.454 | 0.353 | 0.072 |
| 210 | 3.169 | 3.164 | 2.272 | 0.455 | 0.364 | 0.073 |
| 220 | 3.175 | 3.176 | 2.272 | 0.456 | 0.375 | 0.074 |
| 230 | 3.193 | 3.188 | 2.272 | 0.457 | 0.385 | 0.074 |
| 240 | 3.198 | 3.199 | 2.272 | 0.458 | 0.394 | 0.075 |
| 250 | 3.225 | 3.210 | 2.272 | 0.459 | 0.404 | 0.076 |
| 260 | 3.222 | 3.220 | 2.272 | 0.460 | 0.412 | 0.076 |
| 270 | 3.225 | 3.229 | 2.272 | 0.460 | 0.421 | 0.077 |
| 280 | 3.245 | 3.238 | 2.272 | 0.460 | 0.429 | 0.077 |
| 290 | 3.246 | 3.247 | 2.272 | 0.461 | 0.437 | 0.078 |
| 300 | 3.253 | 3.255 | 2.272 | 0.461 | 0.444 | 0.078 |
| 310 | 3.247 | 3.263 | 2.272 | 0.461 | 0.451 | 0.078 |
| 320 | 3.258 | 3.270 | 2.272 | 0.461 | 0.458 | 0.079 |
| 330 | 3.266 | 3.277 | 2.272 | 0.461 | 0.465 | 0.079 |
| 340 | 3.246 | 3.283 | 2.272 | 0.462 | 0.471 | 0.079 |
| 350 | 3.243 | 3.290 | 2.272 | 0.462 | 0.477 | 0.079 |
| 360 | 3.253 | 3.296 | 2.272 | 0.462 | 0.483 | 0.080 |
| 370 | 3.282 | 3.301 | 2.272 | 0.462 | 0.488 | 0.080 |
| 380 | 3.288 | 3.307 | 2.272 | 0.462 | 0.494 | 0.080 |
| 390 | 3.308 | 3.312 | 2.272 | 0.462 | 0.499 | 0.080 |
| 400 | 3.286 | 3.317 | 2.272 | 0.462 | 0.503 | 0.080 |
| 410 | 3.305 | 3.322 | 2.272 | 0.462 | 0.508 | 0.080 |
| 420 | 3.297 | 3.327 | 2.272 | 0.462 | 0.513 | 0.080 |
| 430 | 3.332 | 3.331 | 2.272 | 0.462 | 0.517 | 0.081 |
| 440 | 3.342 | 3.335 | 2.272 | 0.462 | 0.521 | 0.081 |
| 450 | 3.328 | 3.339 | 2.272 | 0.462 | 0.525 | 0.081 |
| 460 | 3.324 | 3.343 | 2.272 | 0.462 | 0.529 | 0.081 |
| 470 | 3.294 | 3.347 | 2.272 | 0.462 | 0.532 | 0.081 |
| 480 | 3.349 | 3.350 | 2.272 | 0.462 | 0.536 | 0.081 |
| 490 | 3.346 | 3.353 | 2.272 | 0.462 | 0.539 | 0.081 |
| 500 | 3.335 | 3.357 | 2.272 | 0.462 | 0.542 | 0.081 |
| 510 | 3.338 | 3.360 | 2.272 | 0.462 | 0.545 | 0.081 |
| 520 | 3.340 | 3.363 | 2.272 | 0.462 | 0.548 | 0.081 |
| 530 | 3.359 | 3.366 | 2.272 | 0.462 | 0.551 | 0.081 |
| 540 | 3.332 | 3.368 | 2.272 | 0.462 | 0.553 | 0.081 |
| 550 | 3.360 | 3.371 | 2.272 | 0.462 | 0.556 | 0.081 |
| 560 | 3.338 | 3.373 | 2.272 | 0.462 | 0.558 | 0.081 |
| 570 | 3.325 | 3.376 | 2.272 | 0.462 | 0.561 | 0.081 |
| 580 | 3.355 | 3.378 | 2.272 | 0.462 | 0.563 | 0.081 |



|              |                        |       |       |       |       |       |       |       |                                         |
|--------------|------------------------|-------|-------|-------|-------|-------|-------|-------|-----------------------------------------|
|              |                        | 590   | 3.358 | 3.380 | 2.272 | 0.462 | 0.565 | 0.081 |                                         |
|              |                        | 600   | 3.347 | 3.382 | 2.272 | 0.462 | 0.567 | 0.081 |                                         |
| GFET<br>#M59 | $c^{(CEA)} = 50$<br>nM | -50   | 2.287 | 2.266 | -     | -     | -     | -     | $\bar{c}^{(CEA)} \approx$<br>55.2155 nM |
|              |                        | -40   | 2.259 | 2.266 |       |       |       |       |                                         |
|              |                        | -30   | 2.244 | 2.266 |       |       |       |       |                                         |
|              |                        | -20   | 2.293 | 2.266 |       |       |       |       |                                         |
|              |                        | -10   | 2.256 | 2.266 |       |       |       |       |                                         |
|              |                        | 0     | 2.256 | 2.266 |       |       |       |       |                                         |
|              |                        | 10    | 2.469 | 2.417 | 2.266 | 0.087 | 0.025 | 0.039 |                                         |
|              |                        | 20    | 2.585 | 2.533 | 2.266 | 0.158 | 0.048 | 0.062 |                                         |
|              |                        | 30    | 2.676 | 2.627 | 2.266 | 0.216 | 0.071 | 0.074 |                                         |
|              |                        | 40    | 2.728 | 2.703 | 2.266 | 0.263 | 0.093 | 0.081 |                                         |
|              |                        | 50    | 2.817 | 2.767 | 2.266 | 0.302 | 0.114 | 0.085 |                                         |
|              |                        | 60    | 2.851 | 2.821 | 2.266 | 0.334 | 0.134 | 0.087 |                                         |
|              |                        | 70    | 2.867 | 2.867 | 2.266 | 0.360 | 0.153 | 0.088 |                                         |
|              |                        | 80    | 2.907 | 2.908 | 2.266 | 0.382 | 0.171 | 0.089 |                                         |
|              |                        | 90    | 2.962 | 2.943 | 2.266 | 0.399 | 0.189 | 0.090 |                                         |
|              |                        | 100   | 3.019 | 2.975 | 2.266 | 0.413 | 0.206 | 0.090 |                                         |
|              |                        | 110   | 3.016 | 3.003 | 2.266 | 0.425 | 0.222 | 0.090 |                                         |
|              |                        | 120   | 3.042 | 3.028 | 2.266 | 0.435 | 0.238 | 0.090 |                                         |
|              |                        | 130   | 3.078 | 3.051 | 2.266 | 0.442 | 0.253 | 0.090 |                                         |
|              |                        | 140   | 3.066 | 3.072 | 2.266 | 0.449 | 0.267 | 0.090 |                                         |
|              |                        | 150   | 3.101 | 3.091 | 2.266 | 0.454 | 0.281 | 0.090 |                                         |
|              |                        | 160   | 3.111 | 3.109 | 2.266 | 0.458 | 0.294 | 0.090 |                                         |
|              |                        | 170   | 3.133 | 3.125 | 2.266 | 0.462 | 0.307 | 0.090 |                                         |
|              |                        | 180   | 3.160 | 3.140 | 2.266 | 0.465 | 0.319 | 0.090 |                                         |
|              |                        | 190   | 3.153 | 3.154 | 2.266 | 0.467 | 0.331 | 0.090 |                                         |
|              |                        | 200   | 3.172 | 3.167 | 2.266 | 0.469 | 0.342 | 0.090 |                                         |
|              |                        | 210   | 3.179 | 3.179 | 2.266 | 0.471 | 0.353 | 0.090 |                                         |
|              |                        | 220   | 3.209 | 3.191 | 2.266 | 0.472 | 0.363 | 0.090 |                                         |
|              |                        | 230   | 3.220 | 3.202 | 2.266 | 0.473 | 0.373 | 0.090 |                                         |
|              |                        | 240   | 3.202 | 3.212 | 2.266 | 0.474 | 0.382 | 0.090 |                                         |
|              |                        | 250   | 3.246 | 3.222 | 2.266 | 0.475 | 0.392 | 0.090 |                                         |
|              |                        | 260   | 3.234 | 3.231 | 2.266 | 0.475 | 0.400 | 0.090 |                                         |
|              |                        | 270   | 3.258 | 3.240 | 2.266 | 0.476 | 0.409 | 0.090 |                                         |
|              |                        | 280   | 3.243 | 3.249 | 2.266 | 0.476 | 0.417 | 0.090 |                                         |
|              |                        | 290   | 3.252 | 3.257 | 2.266 | 0.476 | 0.424 | 0.090 |                                         |
|              |                        | 300   | 3.260 | 3.264 | 2.266 | 0.477 | 0.432 | 0.090 |                                         |
|              |                        | 310   | 3.259 | 3.272 | 2.266 | 0.477 | 0.439 | 0.090 |                                         |
|              |                        | 320   | 3.283 | 3.279 | 2.266 | 0.477 | 0.446 | 0.090 |                                         |
| 330          | 3.296                  | 3.285 | 2.266 | 0.477 | 0.452 | 0.090 |       |       |                                         |
| 340          | 3.288                  | 3.292 | 2.266 | 0.477 | 0.459 | 0.090 |       |       |                                         |
| 350          | 3.283                  | 3.298 | 2.266 | 0.477 | 0.465 | 0.090 |       |       |                                         |
| 360          | 3.286                  | 3.304 | 2.266 | 0.477 | 0.470 | 0.090 |       |       |                                         |
| 370          | 3.315                  | 3.309 | 2.266 | 0.478 | 0.476 | 0.090 |       |       |                                         |
| 380          | 3.307                  | 3.315 | 2.266 | 0.478 | 0.481 | 0.090 |       |       |                                         |
|              | $c^{(AFP)} = 50$<br>nM |       |       |       |       |       |       |       | $\bar{c}^{(AFP)} \approx$<br>32.8966 nM |
|              | $c^{(PTH)} = 20$<br>nM |       |       |       |       |       |       |       | $\bar{c}^{(PTH)} \approx$<br>54.0543 nM |

|              |                        |       |       |       |       |       |       |                                         |                                         |
|--------------|------------------------|-------|-------|-------|-------|-------|-------|-----------------------------------------|-----------------------------------------|
|              |                        | 390   | 3.316 | 3.320 | 2.266 | 0.478 | 0.486 | 0.090                                   |                                         |
|              |                        | 400   | 3.335 | 3.325 | 2.266 | 0.478 | 0.491 | 0.090                                   |                                         |
|              |                        | 410   | 3.323 | 3.329 | 2.266 | 0.478 | 0.496 | 0.090                                   |                                         |
|              |                        | 420   | 3.338 | 3.334 | 2.266 | 0.478 | 0.500 | 0.090                                   |                                         |
|              |                        | 430   | 3.311 | 3.338 | 2.266 | 0.478 | 0.505 | 0.090                                   |                                         |
|              |                        | 440   | 3.326 | 3.342 | 2.266 | 0.478 | 0.509 | 0.090                                   |                                         |
|              |                        | 450   | 3.307 | 3.346 | 2.266 | 0.478 | 0.513 | 0.090                                   |                                         |
|              |                        | 460   | 3.341 | 3.350 | 2.266 | 0.478 | 0.517 | 0.090                                   |                                         |
|              |                        | 470   | 3.341 | 3.354 | 2.266 | 0.478 | 0.520 | 0.090                                   |                                         |
|              |                        | 480   | 3.320 | 3.357 | 2.266 | 0.478 | 0.524 | 0.090                                   |                                         |
|              |                        | 490   | 3.354 | 3.361 | 2.266 | 0.478 | 0.527 | 0.090                                   |                                         |
|              |                        | 500   | 3.360 | 3.364 | 2.266 | 0.478 | 0.530 | 0.090                                   |                                         |
|              |                        | 510   | 3.347 | 3.367 | 2.266 | 0.478 | 0.533 | 0.090                                   |                                         |
|              |                        | 520   | 3.347 | 3.370 | 2.266 | 0.478 | 0.536 | 0.090                                   |                                         |
|              |                        | 530   | 3.358 | 3.373 | 2.266 | 0.478 | 0.539 | 0.090                                   |                                         |
|              |                        | 540   | 3.346 | 3.376 | 2.266 | 0.478 | 0.542 | 0.090                                   |                                         |
|              |                        | 550   | 3.376 | 3.378 | 2.266 | 0.478 | 0.545 | 0.090                                   |                                         |
|              |                        | 560   | 3.357 | 3.381 | 2.266 | 0.478 | 0.547 | 0.090                                   |                                         |
|              |                        | 570   | 3.380 | 3.383 | 2.266 | 0.478 | 0.550 | 0.090                                   |                                         |
|              |                        | 580   | 3.392 | 3.386 | 2.266 | 0.478 | 0.552 | 0.090                                   |                                         |
|              |                        | 590   | 3.362 | 3.388 | 2.266 | 0.478 | 0.554 | 0.090                                   |                                         |
|              |                        | 600   | 3.369 | 3.390 | 2.266 | 0.478 | 0.556 | 0.090                                   |                                         |
| GFET<br>#M60 | $c^{(CEA)} = 50$<br>nM | -50   | 2.289 | 2.293 | -     | -     | -     | -                                       | $\bar{c}^{(CEA)} \approx$<br>53.3155 nM |
|              |                        | -40   | 2.289 | 2.293 |       |       |       |                                         |                                         |
|              |                        | -30   | 2.260 | 2.293 |       |       |       |                                         |                                         |
|              |                        | -20   | 2.298 | 2.293 |       |       |       |                                         |                                         |
|              |                        | -10   | 2.310 | 2.293 |       |       |       |                                         |                                         |
|              | 0                      | 2.310 | 2.293 | 2.293 | 0.000 | 0.000 | 0.000 |                                         |                                         |
|              | 10                     | 2.507 | 2.452 | 2.293 | 0.080 | 0.025 | 0.055 |                                         |                                         |
|              | 20                     | 2.633 | 2.562 | 2.293 | 0.145 | 0.049 | 0.075 |                                         |                                         |
|              | 30                     | 2.685 | 2.648 | 2.293 | 0.200 | 0.072 | 0.083 |                                         |                                         |
|              | 40                     | 2.768 | 2.717 | 2.293 | 0.244 | 0.094 | 0.086 |                                         |                                         |
|              | 50                     | 2.816 | 2.776 | 2.293 | 0.281 | 0.115 | 0.088 |                                         |                                         |
|              | 60                     | 2.869 | 2.827 | 2.293 | 0.311 | 0.135 | 0.088 |                                         |                                         |
|              | 70                     | 2.911 | 2.872 | 2.293 | 0.336 | 0.155 | 0.088 |                                         |                                         |
|              | 80                     | 2.953 | 2.911 | 2.293 | 0.357 | 0.173 | 0.088 |                                         |                                         |
|              | 90                     | 2.986 | 2.946 | 2.293 | 0.374 | 0.191 | 0.088 |                                         |                                         |
|              | 100                    | 3.026 | 2.977 | 2.293 | 0.388 | 0.208 | 0.088 |                                         |                                         |
|              | 110                    | 3.011 | 3.005 | 2.293 | 0.399 | 0.225 | 0.088 |                                         |                                         |
|              | 120                    | 3.046 | 3.030 | 2.293 | 0.409 | 0.241 | 0.088 |                                         |                                         |
|              | 130                    | 3.074 | 3.053 | 2.293 | 0.417 | 0.256 | 0.088 |                                         |                                         |
|              | 140                    | 3.090 | 3.074 | 2.293 | 0.423 | 0.270 | 0.088 |                                         |                                         |
| 150          | 3.120                  | 3.094 | 2.293 | 0.428 | 0.284 | 0.088 |       |                                         |                                         |
| 160          | 3.139                  | 3.111 | 2.293 | 0.433 | 0.298 | 0.088 |       |                                         |                                         |
| 170          | 3.136                  | 3.128 | 2.293 | 0.436 | 0.310 | 0.088 |       |                                         |                                         |
| 180          | 3.164                  | 3.143 | 2.293 | 0.439 | 0.323 | 0.088 |       |                                         |                                         |
|              | $c^{(AFP)} = 50$<br>nM |       |       |       |       |       |       | $\bar{c}^{(AFP)} \approx$<br>33.2175 nM |                                         |
|              | $c^{(PTH)} = 50$<br>nM |       |       |       |       |       |       | $\bar{c}^{(PTH)} \approx$<br>91.8600 nM |                                         |

|              |                                                   |     |       |       |       |       |       |       |                                                                              |
|--------------|---------------------------------------------------|-----|-------|-------|-------|-------|-------|-------|------------------------------------------------------------------------------|
|              |                                                   | 190 | 3.192 | 3.157 | 2.293 | 0.442 | 0.334 | 0.088 |                                                                              |
|              |                                                   | 200 | 3.210 | 3.171 | 2.293 | 0.444 | 0.346 | 0.088 |                                                                              |
|              |                                                   | 210 | 3.181 | 3.183 | 2.293 | 0.445 | 0.357 | 0.088 |                                                                              |
|              |                                                   | 220 | 3.207 | 3.195 | 2.293 | 0.447 | 0.367 | 0.088 |                                                                              |
|              |                                                   | 230 | 3.221 | 3.206 | 2.293 | 0.448 | 0.377 | 0.088 |                                                                              |
|              |                                                   | 240 | 3.232 | 3.216 | 2.293 | 0.449 | 0.386 | 0.088 |                                                                              |
|              |                                                   | 250 | 3.229 | 3.226 | 2.293 | 0.450 | 0.396 | 0.088 |                                                                              |
|              |                                                   | 260 | 3.239 | 3.236 | 2.293 | 0.450 | 0.404 | 0.088 |                                                                              |
|              |                                                   | 270 | 3.235 | 3.245 | 2.293 | 0.451 | 0.413 | 0.088 |                                                                              |
|              |                                                   | 280 | 3.267 | 3.253 | 2.293 | 0.451 | 0.421 | 0.088 |                                                                              |
|              |                                                   | 290 | 3.271 | 3.261 | 2.293 | 0.452 | 0.429 | 0.088 |                                                                              |
|              |                                                   | 300 | 3.284 | 3.269 | 2.293 | 0.452 | 0.436 | 0.088 |                                                                              |
|              |                                                   | 310 | 3.268 | 3.276 | 2.293 | 0.452 | 0.443 | 0.088 |                                                                              |
|              |                                                   | 320 | 3.285 | 3.283 | 2.293 | 0.452 | 0.450 | 0.088 |                                                                              |
|              |                                                   | 330 | 3.276 | 3.290 | 2.293 | 0.452 | 0.457 | 0.088 |                                                                              |
|              |                                                   | 340 | 3.299 | 3.297 | 2.293 | 0.453 | 0.463 | 0.088 |                                                                              |
|              |                                                   | 350 | 3.294 | 3.303 | 2.293 | 0.453 | 0.469 | 0.088 |                                                                              |
|              |                                                   | 360 | 3.299 | 3.309 | 2.293 | 0.453 | 0.475 | 0.088 |                                                                              |
|              |                                                   | 370 | 3.306 | 3.314 | 2.293 | 0.453 | 0.480 | 0.088 |                                                                              |
|              |                                                   | 380 | 3.304 | 3.320 | 2.293 | 0.453 | 0.486 | 0.088 |                                                                              |
|              |                                                   | 390 | 3.289 | 3.325 | 2.293 | 0.453 | 0.491 | 0.088 |                                                                              |
|              |                                                   | 400 | 3.327 | 3.330 | 2.293 | 0.453 | 0.496 | 0.088 |                                                                              |
|              |                                                   | 410 | 3.302 | 3.334 | 2.293 | 0.453 | 0.500 | 0.088 |                                                                              |
|              |                                                   | 420 | 3.324 | 3.339 | 2.293 | 0.453 | 0.505 | 0.088 |                                                                              |
|              |                                                   | 430 | 3.308 | 3.343 | 2.293 | 0.453 | 0.509 | 0.088 |                                                                              |
|              |                                                   | 440 | 3.321 | 3.347 | 2.293 | 0.453 | 0.513 | 0.088 |                                                                              |
|              |                                                   | 450 | 3.342 | 3.351 | 2.293 | 0.453 | 0.517 | 0.088 |                                                                              |
|              |                                                   | 460 | 3.318 | 3.355 | 2.293 | 0.453 | 0.521 | 0.088 |                                                                              |
|              |                                                   | 470 | 3.317 | 3.359 | 2.293 | 0.453 | 0.525 | 0.088 |                                                                              |
|              |                                                   | 480 | 3.330 | 3.362 | 2.293 | 0.453 | 0.528 | 0.088 |                                                                              |
|              |                                                   | 490 | 3.356 | 3.366 | 2.293 | 0.453 | 0.532 | 0.088 |                                                                              |
|              |                                                   | 500 | 3.358 | 3.369 | 2.293 | 0.453 | 0.535 | 0.088 |                                                                              |
|              |                                                   | 510 | 3.363 | 3.372 | 2.293 | 0.453 | 0.538 | 0.088 |                                                                              |
|              |                                                   | 520 | 3.380 | 3.375 | 2.293 | 0.453 | 0.541 | 0.088 |                                                                              |
|              |                                                   | 530 | 3.360 | 3.378 | 2.293 | 0.453 | 0.544 | 0.088 |                                                                              |
|              |                                                   | 540 | 3.358 | 3.381 | 2.293 | 0.453 | 0.546 | 0.088 |                                                                              |
|              |                                                   | 550 | 3.347 | 3.383 | 2.293 | 0.453 | 0.549 | 0.088 |                                                                              |
|              |                                                   | 560 | 3.351 | 3.386 | 2.293 | 0.453 | 0.552 | 0.088 |                                                                              |
|              |                                                   | 570 | 3.357 | 3.388 | 2.293 | 0.453 | 0.554 | 0.088 |                                                                              |
|              |                                                   | 580 | 3.364 | 3.391 | 2.293 | 0.453 | 0.556 | 0.088 |                                                                              |
|              |                                                   | 590 | 3.369 | 3.393 | 2.293 | 0.453 | 0.559 | 0.088 |                                                                              |
|              |                                                   | 600 | 3.376 | 3.395 | 2.293 | 0.453 | 0.561 | 0.088 |                                                                              |
| GFET<br>#M61 | $c^{(CEA)} = 50$<br>nM<br>$c^{(AFP)} = 100$<br>nM | -50 | 2.278 | 2.272 | -     | -     | -     | -     | $\bar{c}^{(CEA)} \approx 45.1237$ nM<br>$\bar{c}^{(AFP)} \approx 65.0954$ nM |
|              |                                                   | -40 | 2.273 | 2.272 |       |       |       |       |                                                                              |
|              |                                                   | -30 | 2.288 | 2.272 |       |       |       |       |                                                                              |
|              |                                                   | -20 | 2.279 | 2.272 |       |       |       |       |                                                                              |

|                       |       |       |       |       |       |       |       |                                        |
|-----------------------|-------|-------|-------|-------|-------|-------|-------|----------------------------------------|
| $c^{(PTH)} = 2$<br>nM | -10   | 2.258 | 2.272 |       |       |       |       | $\bar{c}^{(PTH)} \approx$<br>9.9785 nM |
|                       | 0     | 2.258 | 2.272 | 2.272 | 0.000 | 0.000 | 0.000 |                                        |
|                       | 10    | 2.468 | 2.393 | 2.272 | 0.069 | 0.045 | 0.006 |                                        |
|                       | 20    | 2.572 | 2.500 | 2.272 | 0.128 | 0.088 | 0.012 |                                        |
|                       | 30    | 2.682 | 2.594 | 2.272 | 0.178 | 0.127 | 0.017 |                                        |
|                       | 40    | 2.726 | 2.677 | 2.272 | 0.220 | 0.164 | 0.021 |                                        |
|                       | 50    | 2.782 | 2.750 | 2.272 | 0.256 | 0.197 | 0.025 |                                        |
|                       | 60    | 2.842 | 2.816 | 2.272 | 0.286 | 0.229 | 0.028 |                                        |
|                       | 70    | 2.897 | 2.874 | 2.272 | 0.312 | 0.258 | 0.031 |                                        |
|                       | 80    | 2.930 | 2.925 | 2.272 | 0.334 | 0.285 | 0.034 |                                        |
|                       | 90    | 2.971 | 2.972 | 2.272 | 0.353 | 0.311 | 0.036 |                                        |
|                       | 100   | 3.004 | 3.013 | 2.272 | 0.368 | 0.334 | 0.038 |                                        |
|                       | 110   | 3.016 | 3.050 | 2.272 | 0.382 | 0.356 | 0.040 |                                        |
|                       | 120   | 3.074 | 3.083 | 2.272 | 0.393 | 0.376 | 0.042 |                                        |
|                       | 130   | 3.106 | 3.113 | 2.272 | 0.403 | 0.395 | 0.043 |                                        |
|                       | 140   | 3.117 | 3.140 | 2.272 | 0.411 | 0.413 | 0.044 |                                        |
|                       | 150   | 3.145 | 3.164 | 2.272 | 0.418 | 0.429 | 0.045 |                                        |
|                       | 160   | 3.157 | 3.186 | 2.272 | 0.424 | 0.444 | 0.046 |                                        |
|                       | 170   | 3.183 | 3.206 | 2.272 | 0.429 | 0.458 | 0.047 |                                        |
|                       | 180   | 3.199 | 3.224 | 2.272 | 0.433 | 0.471 | 0.048 |                                        |
|                       | 190   | 3.236 | 3.240 | 2.272 | 0.437 | 0.483 | 0.048 |                                        |
|                       | 200   | 3.249 | 3.255 | 2.272 | 0.440 | 0.494 | 0.049 |                                        |
|                       | 210   | 3.264 | 3.269 | 2.272 | 0.442 | 0.505 | 0.050 |                                        |
|                       | 220   | 3.282 | 3.281 | 2.272 | 0.445 | 0.515 | 0.050 |                                        |
|                       | 230   | 3.272 | 3.293 | 2.272 | 0.446 | 0.524 | 0.050 |                                        |
|                       | 240   | 3.256 | 3.303 | 2.272 | 0.448 | 0.532 | 0.051 |                                        |
|                       | 250   | 3.298 | 3.312 | 2.272 | 0.449 | 0.540 | 0.051 |                                        |
|                       | 260   | 3.295 | 3.321 | 2.272 | 0.450 | 0.547 | 0.051 |                                        |
|                       | 270   | 3.311 | 3.329 | 2.272 | 0.451 | 0.554 | 0.052 |                                        |
|                       | 280   | 3.353 | 3.336 | 2.272 | 0.452 | 0.560 | 0.052 |                                        |
|                       | 290   | 3.312 | 3.343 | 2.272 | 0.453 | 0.566 | 0.052 |                                        |
|                       | 300   | 3.334 | 3.349 | 2.272 | 0.454 | 0.571 | 0.052 |                                        |
|                       | 310   | 3.376 | 3.355 | 2.272 | 0.454 | 0.576 | 0.052 |                                        |
|                       | 320   | 3.350 | 3.360 | 2.272 | 0.454 | 0.581 | 0.052 |                                        |
|                       | 330   | 3.335 | 3.365 | 2.272 | 0.455 | 0.585 | 0.052 |                                        |
|                       | 340   | 3.363 | 3.369 | 2.272 | 0.455 | 0.589 | 0.053 |                                        |
|                       | 350   | 3.331 | 3.373 | 2.272 | 0.455 | 0.593 | 0.053 |                                        |
|                       | 360   | 3.381 | 3.377 | 2.272 | 0.456 | 0.597 | 0.053 |                                        |
|                       | 370   | 3.364 | 3.380 | 2.272 | 0.456 | 0.600 | 0.053 |                                        |
|                       | 380   | 3.362 | 3.384 | 2.272 | 0.456 | 0.603 | 0.053 |                                        |
|                       | 390   | 3.417 | 3.387 | 2.272 | 0.456 | 0.606 | 0.053 |                                        |
|                       | 400   | 3.389 | 3.389 | 2.272 | 0.456 | 0.608 | 0.053 |                                        |
|                       | 410   | 3.364 | 3.392 | 2.272 | 0.456 | 0.611 | 0.053 |                                        |
|                       | 420   | 3.390 | 3.394 | 2.272 | 0.456 | 0.613 | 0.053 |                                        |
| 430                   | 3.394 | 3.397 | 2.272 | 0.456 | 0.615 | 0.053 |       |                                        |
| 440                   | 3.386 | 3.399 | 2.272 | 0.457 | 0.617 | 0.053 |       |                                        |

|              |                        |       |       |       |       |       |       |                                      |                                      |
|--------------|------------------------|-------|-------|-------|-------|-------|-------|--------------------------------------|--------------------------------------|
|              |                        | 450   | 3.389 | 3.400 | 2.272 | 0.457 | 0.619 | 0.053                                |                                      |
|              |                        | 460   | 3.394 | 3.402 | 2.272 | 0.457 | 0.620 | 0.053                                |                                      |
|              |                        | 470   | 3.383 | 3.404 | 2.272 | 0.457 | 0.622 | 0.053                                |                                      |
|              |                        | 480   | 3.403 | 3.405 | 2.272 | 0.457 | 0.623 | 0.053                                |                                      |
|              |                        | 490   | 3.400 | 3.407 | 2.272 | 0.457 | 0.625 | 0.053                                |                                      |
|              |                        | 500   | 3.398 | 3.408 | 2.272 | 0.457 | 0.626 | 0.053                                |                                      |
|              |                        | 510   | 3.400 | 3.409 | 2.272 | 0.457 | 0.627 | 0.053                                |                                      |
|              |                        | 520   | 3.409 | 3.410 | 2.272 | 0.457 | 0.628 | 0.053                                |                                      |
|              |                        | 530   | 3.431 | 3.411 | 2.272 | 0.457 | 0.629 | 0.053                                |                                      |
|              |                        | 540   | 3.422 | 3.412 | 2.272 | 0.457 | 0.630 | 0.053                                |                                      |
|              |                        | 550   | 3.403 | 3.413 | 2.272 | 0.457 | 0.631 | 0.053                                |                                      |
|              |                        | 560   | 3.412 | 3.414 | 2.272 | 0.457 | 0.632 | 0.053                                |                                      |
|              |                        | 570   | 3.401 | 3.415 | 2.272 | 0.457 | 0.632 | 0.053                                |                                      |
|              |                        | 580   | 3.403 | 3.415 | 2.272 | 0.457 | 0.633 | 0.053                                |                                      |
|              |                        | 590   | 3.421 | 3.416 | 2.272 | 0.457 | 0.634 | 0.053                                |                                      |
|              |                        | 600   | 3.422 | 3.417 | 2.272 | 0.457 | 0.634 | 0.053                                |                                      |
| GFET<br>#M62 | $c^{(CEA)} = 50$<br>nM | -50   | 2.271 | 2.276 | -     | -     | -     | -                                    | $\bar{c}^{(CEA)} \approx 43.2317$ nM |
|              |                        | -40   | 2.269 | 2.276 |       |       |       |                                      |                                      |
|              |                        | -30   | 2.258 | 2.276 |       |       |       |                                      |                                      |
|              |                        | -20   | 2.285 | 2.276 |       |       |       |                                      |                                      |
|              |                        | -10   | 2.286 | 2.276 |       |       |       |                                      |                                      |
|              | 0                      | 2.286 | 2.276 | 2.276 | 0.000 | 0.000 | 0.000 |                                      |                                      |
|              | 10                     | 2.490 | 2.396 | 2.276 | 0.072 | 0.042 | 0.006 |                                      |                                      |
|              | 20                     | 2.573 | 2.502 | 2.276 | 0.133 | 0.081 | 0.012 |                                      |                                      |
|              | 30                     | 2.646 | 2.596 | 2.276 | 0.186 | 0.118 | 0.017 |                                      |                                      |
|              | 40                     | 2.735 | 2.679 | 2.276 | 0.230 | 0.152 | 0.021 |                                      |                                      |
|              | 50                     | 2.793 | 2.753 | 2.276 | 0.269 | 0.183 | 0.025 |                                      |                                      |
|              | 60                     | 2.866 | 2.818 | 2.276 | 0.301 | 0.213 | 0.029 |                                      |                                      |
|              | 70                     | 2.893 | 2.877 | 2.276 | 0.329 | 0.240 | 0.032 |                                      |                                      |
|              | 80                     | 2.948 | 2.928 | 2.276 | 0.353 | 0.265 | 0.034 |                                      |                                      |
|              | 90                     | 2.977 | 2.975 | 2.276 | 0.373 | 0.289 | 0.037 | $\bar{c}^{(AFP)} \approx 64.1875$ nM |                                      |
|              | 100                    | 3.043 | 3.016 | 2.276 | 0.391 | 0.311 | 0.039 |                                      |                                      |
|              | 110                    | 3.047 | 3.053 | 2.276 | 0.406 | 0.331 | 0.041 | $\bar{c}^{(PTH)} \approx 10.0132$ nM |                                      |
|              | 120                    | 3.077 | 3.087 | 2.276 | 0.418 | 0.350 | 0.042 |                                      |                                      |
|              | 130                    | 3.103 | 3.116 | 2.276 | 0.429 | 0.368 | 0.044 |                                      |                                      |
|              | 140                    | 3.135 | 3.143 | 2.276 | 0.439 | 0.384 | 0.045 |                                      |                                      |
|              | 150                    | 3.148 | 3.168 | 2.276 | 0.446 | 0.399 | 0.046 |                                      |                                      |
|              | 160                    | 3.192 | 3.190 | 2.276 | 0.453 | 0.414 | 0.047 |                                      |                                      |
|              | 170                    | 3.213 | 3.209 | 2.276 | 0.459 | 0.427 | 0.048 |                                      |                                      |
|              | 180                    | 3.225 | 3.227 | 2.276 | 0.464 | 0.439 | 0.048 |                                      |                                      |
| 190          | 3.210                  | 3.244 | 2.276 | 0.468 | 0.451 | 0.049 |       |                                      |                                      |
| 200          | 3.281                  | 3.258 | 2.276 | 0.472 | 0.461 | 0.050 |       |                                      |                                      |
| 210          | 3.244                  | 3.272 | 2.276 | 0.475 | 0.471 | 0.050 |       |                                      |                                      |
| 220          | 3.285                  | 3.284 | 2.276 | 0.478 | 0.480 | 0.051 |       |                                      |                                      |
| 230          | 3.283                  | 3.295 | 2.276 | 0.480 | 0.489 | 0.051 |       |                                      |                                      |
| 240          | 3.273                  | 3.306 | 2.276 | 0.482 | 0.497 | 0.051 |       |                                      |                                      |

|              |                         |                        |       |       |       |       |       |                                           |                                           |       |
|--------------|-------------------------|------------------------|-------|-------|-------|-------|-------|-------------------------------------------|-------------------------------------------|-------|
|              |                         | 250                    | 3.271 | 3.315 | 2.276 | 0.483 | 0.504 | 0.052                                     |                                           |       |
|              |                         | 260                    | 3.308 | 3.323 | 2.276 | 0.485 | 0.511 | 0.052                                     |                                           |       |
|              |                         | 270                    | 3.313 | 3.331 | 2.276 | 0.486 | 0.517 | 0.052                                     |                                           |       |
|              |                         | 280                    | 3.307 | 3.338 | 2.276 | 0.487 | 0.523 | 0.052                                     |                                           |       |
|              |                         | 290                    | 3.310 | 3.345 | 2.276 | 0.488 | 0.529 | 0.053                                     |                                           |       |
|              |                         | 300                    | 3.331 | 3.351 | 2.276 | 0.489 | 0.534 | 0.053                                     |                                           |       |
|              |                         | 310                    | 3.352 | 3.357 | 2.276 | 0.489 | 0.539 | 0.053                                     |                                           |       |
|              |                         | 320                    | 3.333 | 3.362 | 2.276 | 0.490 | 0.543 | 0.053                                     |                                           |       |
|              |                         | 330                    | 3.350 | 3.367 | 2.276 | 0.490 | 0.547 | 0.053                                     |                                           |       |
|              |                         | 340                    | 3.328 | 3.371 | 2.276 | 0.491 | 0.551 | 0.053                                     |                                           |       |
|              |                         | 350                    | 3.367 | 3.375 | 2.276 | 0.491 | 0.555 | 0.053                                     |                                           |       |
|              |                         | 360                    | 3.359 | 3.379 | 2.276 | 0.491 | 0.558 | 0.053                                     |                                           |       |
|              |                         | 370                    | 3.358 | 3.382 | 2.276 | 0.491 | 0.561 | 0.054                                     |                                           |       |
|              |                         | 380                    | 3.372 | 3.385 | 2.276 | 0.492 | 0.564 | 0.054                                     |                                           |       |
|              |                         | 390                    | 3.372 | 3.388 | 2.276 | 0.492 | 0.567 | 0.054                                     |                                           |       |
|              |                         | 400                    | 3.376 | 3.391 | 2.276 | 0.492 | 0.569 | 0.054                                     |                                           |       |
|              |                         | 410                    | 3.390 | 3.393 | 2.276 | 0.492 | 0.571 | 0.054                                     |                                           |       |
|              |                         | 420                    | 3.404 | 3.395 | 2.276 | 0.492 | 0.574 | 0.054                                     |                                           |       |
|              |                         | 430                    | 3.368 | 3.398 | 2.276 | 0.492 | 0.576 | 0.054                                     |                                           |       |
|              |                         | 440                    | 3.378 | 3.400 | 2.276 | 0.492 | 0.577 | 0.054                                     |                                           |       |
|              |                         | 450                    | 3.393 | 3.401 | 2.276 | 0.493 | 0.579 | 0.054                                     |                                           |       |
|              |                         | 460                    | 3.397 | 3.403 | 2.276 | 0.493 | 0.581 | 0.054                                     |                                           |       |
|              |                         | 470                    | 3.415 | 3.405 | 2.276 | 0.493 | 0.582 | 0.054                                     |                                           |       |
|              |                         | 480                    | 3.400 | 3.406 | 2.276 | 0.493 | 0.584 | 0.054                                     |                                           |       |
|              |                         | 490                    | 3.386 | 3.407 | 2.276 | 0.493 | 0.585 | 0.054                                     |                                           |       |
|              |                         | 500                    | 3.379 | 3.409 | 2.276 | 0.493 | 0.586 | 0.054                                     |                                           |       |
|              |                         | 510                    | 3.392 | 3.410 | 2.276 | 0.493 | 0.587 | 0.054                                     |                                           |       |
|              |                         | 520                    | 3.396 | 3.411 | 2.276 | 0.493 | 0.588 | 0.054                                     |                                           |       |
|              |                         | 530                    | 3.379 | 3.412 | 2.276 | 0.493 | 0.589 | 0.054                                     |                                           |       |
|              |                         | 540                    | 3.388 | 3.413 | 2.276 | 0.493 | 0.590 | 0.054                                     |                                           |       |
|              |                         | 550                    | 3.403 | 3.414 | 2.276 | 0.493 | 0.591 | 0.054                                     |                                           |       |
|              |                         | 560                    | 3.372 | 3.414 | 2.276 | 0.493 | 0.592 | 0.054                                     |                                           |       |
|              |                         | 570                    | 3.409 | 3.415 | 2.276 | 0.493 | 0.593 | 0.054                                     |                                           |       |
|              |                         | 580                    | 3.420 | 3.416 | 2.276 | 0.493 | 0.593 | 0.054                                     |                                           |       |
|              |                         | 590                    | 3.401 | 3.417 | 2.276 | 0.493 | 0.594 | 0.054                                     |                                           |       |
|              |                         | 600                    | 3.426 | 3.417 | 2.276 | 0.493 | 0.594 | 0.054                                     |                                           |       |
| GFET<br>#M63 | $c^{(CEA)} = 50$<br>nM  | -50                    | 2.272 | 2.279 | -     | -     | -     | -                                         | $\tilde{c}^{(CEA)} \approx$<br>54.8794 nM |       |
|              |                         | -40                    | 2.266 | 2.279 |       |       |       |                                           |                                           |       |
|              |                         | -30                    | 2.266 | 2.279 |       |       |       |                                           |                                           |       |
|              |                         | -20                    | 2.271 | 2.279 |       |       |       |                                           |                                           |       |
|              |                         | -10                    | 2.299 | 2.279 |       |       |       |                                           |                                           |       |
|              | $c^{(AFP)} = 100$<br>nM | 0                      | 2.299 | 2.279 | 2.279 | 0.000 | 0.000 | 0.000                                     | $\tilde{c}^{(AFP)} \approx$<br>55.1165 nM |       |
|              |                         | $c^{(PTH)} = 20$<br>nM | 10    | 2.492 | 2.423 | 2.279 | 0.084 | 0.039                                     |                                           | 0.021 |
|              |                         |                        | 20    | 2.579 | 2.543 | 2.279 | 0.152 | 0.076                                     |                                           | 0.036 |
|              |                         |                        | 30    | 2.688 | 2.643 | 2.279 | 0.208 | 0.111                                     |                                           | 0.045 |
|              | 40                      | 2.730                  | 2.727 | 2.279 | 0.254 | 0.143 | 0.051 | $\tilde{c}^{(PTH)} \approx$<br>38.2164 nM |                                           |       |

|     |       |       |       |       |       |       |
|-----|-------|-------|-------|-------|-------|-------|
| 50  | 2.826 | 2.800 | 2.279 | 0.292 | 0.174 | 0.055 |
| 60  | 2.873 | 2.862 | 2.279 | 0.323 | 0.202 | 0.058 |
| 70  | 2.901 | 2.916 | 2.279 | 0.348 | 0.229 | 0.060 |
| 80  | 2.970 | 2.963 | 2.279 | 0.369 | 0.254 | 0.061 |
| 90  | 2.986 | 3.004 | 2.279 | 0.386 | 0.278 | 0.062 |
| 100 | 3.036 | 3.041 | 2.279 | 0.400 | 0.300 | 0.062 |
| 110 | 3.061 | 3.073 | 2.279 | 0.411 | 0.321 | 0.063 |
| 120 | 3.102 | 3.102 | 2.279 | 0.421 | 0.340 | 0.063 |
| 130 | 3.112 | 3.129 | 2.279 | 0.428 | 0.358 | 0.063 |
| 140 | 3.133 | 3.152 | 2.279 | 0.435 | 0.376 | 0.063 |
| 150 | 3.151 | 3.174 | 2.279 | 0.440 | 0.392 | 0.063 |
| 160 | 3.184 | 3.193 | 2.279 | 0.444 | 0.407 | 0.063 |
| 170 | 3.221 | 3.211 | 2.279 | 0.448 | 0.421 | 0.063 |
| 180 | 3.216 | 3.227 | 2.279 | 0.450 | 0.434 | 0.063 |
| 190 | 3.224 | 3.242 | 2.279 | 0.453 | 0.447 | 0.063 |
| 200 | 3.248 | 3.255 | 2.279 | 0.455 | 0.459 | 0.063 |
| 210 | 3.270 | 3.268 | 2.279 | 0.456 | 0.470 | 0.063 |
| 220 | 3.292 | 3.279 | 2.279 | 0.457 | 0.480 | 0.063 |
| 230 | 3.292 | 3.290 | 2.279 | 0.459 | 0.490 | 0.063 |
| 240 | 3.303 | 3.300 | 2.279 | 0.459 | 0.499 | 0.063 |
| 250 | 3.325 | 3.309 | 2.279 | 0.460 | 0.507 | 0.063 |
| 260 | 3.327 | 3.318 | 2.279 | 0.461 | 0.515 | 0.063 |
| 270 | 3.320 | 3.326 | 2.279 | 0.461 | 0.523 | 0.063 |
| 280 | 3.323 | 3.333 | 2.279 | 0.462 | 0.530 | 0.063 |
| 290 | 3.329 | 3.340 | 2.279 | 0.462 | 0.537 | 0.063 |
| 300 | 3.328 | 3.347 | 2.279 | 0.462 | 0.543 | 0.063 |
| 310 | 3.319 | 3.353 | 2.279 | 0.462 | 0.549 | 0.063 |
| 320 | 3.348 | 3.359 | 2.279 | 0.462 | 0.554 | 0.063 |
| 330 | 3.340 | 3.364 | 2.279 | 0.463 | 0.559 | 0.063 |
| 340 | 3.371 | 3.369 | 2.279 | 0.463 | 0.564 | 0.063 |
| 350 | 3.384 | 3.373 | 2.279 | 0.463 | 0.569 | 0.063 |
| 360 | 3.383 | 3.378 | 2.279 | 0.463 | 0.573 | 0.063 |
| 370 | 3.391 | 3.382 | 2.279 | 0.463 | 0.577 | 0.063 |
| 380 | 3.361 | 3.386 | 2.279 | 0.463 | 0.581 | 0.063 |
| 390 | 3.365 | 3.389 | 2.279 | 0.463 | 0.584 | 0.063 |
| 400 | 3.383 | 3.392 | 2.279 | 0.463 | 0.587 | 0.063 |
| 410 | 3.374 | 3.396 | 2.279 | 0.463 | 0.590 | 0.063 |
| 420 | 3.378 | 3.398 | 2.279 | 0.463 | 0.593 | 0.063 |
| 430 | 3.383 | 3.401 | 2.279 | 0.463 | 0.596 | 0.063 |
| 440 | 3.388 | 3.404 | 2.279 | 0.463 | 0.599 | 0.063 |
| 450 | 3.369 | 3.406 | 2.279 | 0.463 | 0.601 | 0.063 |
| 460 | 3.412 | 3.408 | 2.279 | 0.463 | 0.603 | 0.063 |
| 470 | 3.406 | 3.411 | 2.279 | 0.463 | 0.605 | 0.063 |
| 480 | 3.401 | 3.413 | 2.279 | 0.463 | 0.607 | 0.063 |
| 490 | 3.400 | 3.414 | 2.279 | 0.463 | 0.609 | 0.063 |
| 500 | 3.421 | 3.416 | 2.279 | 0.463 | 0.611 | 0.063 |

|              |                                                                             |       |       |       |       |       |       |       |                                                                                                                       |
|--------------|-----------------------------------------------------------------------------|-------|-------|-------|-------|-------|-------|-------|-----------------------------------------------------------------------------------------------------------------------|
|              |                                                                             | 510   | 3.409 | 3.418 | 2.279 | 0.463 | 0.613 | 0.063 |                                                                                                                       |
|              |                                                                             | 520   | 3.409 | 3.419 | 2.279 | 0.463 | 0.614 | 0.063 |                                                                                                                       |
|              |                                                                             | 530   | 3.435 | 3.421 | 2.279 | 0.463 | 0.615 | 0.063 |                                                                                                                       |
|              |                                                                             | 540   | 3.407 | 3.422 | 2.279 | 0.463 | 0.617 | 0.063 |                                                                                                                       |
|              |                                                                             | 550   | 3.412 | 3.423 | 2.279 | 0.463 | 0.618 | 0.063 |                                                                                                                       |
|              |                                                                             | 560   | 3.403 | 3.425 | 2.279 | 0.463 | 0.619 | 0.063 |                                                                                                                       |
|              |                                                                             | 570   | 3.442 | 3.426 | 2.279 | 0.463 | 0.620 | 0.063 |                                                                                                                       |
|              |                                                                             | 580   | 3.384 | 3.427 | 2.279 | 0.463 | 0.621 | 0.063 |                                                                                                                       |
|              |                                                                             | 590   | 3.392 | 3.428 | 2.279 | 0.463 | 0.622 | 0.063 |                                                                                                                       |
|              |                                                                             | 600   | 3.418 | 3.429 | 2.279 | 0.463 | 0.623 | 0.063 |                                                                                                                       |
| GFET<br>#M64 | $c^{(CEA)} = 50$<br>nM<br>$c^{(AFP)} = 100$<br>nM<br>$c^{(PTH)} = 50$<br>nM | -50   | 2.249 | 2.275 | -     | -     | -     | -     | $\bar{c}^{(CEA)} \approx 46.8943$ nM<br>$\bar{c}^{(AFP)} \approx 60.1224$ nM<br>$\bar{c}^{(PTH)} \approx 106.2451$ nM |
|              |                                                                             | -40   | 2.283 | 2.275 |       |       |       |       |                                                                                                                       |
|              |                                                                             | -30   | 2.291 | 2.275 |       |       |       |       |                                                                                                                       |
|              |                                                                             | -20   | 2.277 | 2.275 |       |       |       |       |                                                                                                                       |
|              |                                                                             | -10   | 2.276 | 2.275 |       |       |       |       |                                                                                                                       |
|              |                                                                             | 0     | 2.276 | 2.275 | 2.275 | 0.000 | 0.000 | 0.000 |                                                                                                                       |
|              |                                                                             | 10    | 2.521 | 2.433 | 2.275 | 0.072 | 0.042 | 0.044 |                                                                                                                       |
|              |                                                                             | 20    | 2.628 | 2.548 | 2.275 | 0.133 | 0.081 | 0.058 |                                                                                                                       |
|              |                                                                             | 30    | 2.706 | 2.641 | 2.275 | 0.184 | 0.118 | 0.063 |                                                                                                                       |
|              |                                                                             | 40    | 2.785 | 2.720 | 2.275 | 0.228 | 0.153 | 0.064 |                                                                                                                       |
|              |                                                                             | 50    | 2.851 | 2.789 | 2.275 | 0.264 | 0.185 | 0.065 |                                                                                                                       |
|              |                                                                             | 60    | 2.913 | 2.850 | 2.275 | 0.295 | 0.214 | 0.065 |                                                                                                                       |
|              |                                                                             | 70    | 2.909 | 2.904 | 2.275 | 0.321 | 0.242 | 0.065 |                                                                                                                       |
|              |                                                                             | 80    | 2.981 | 2.952 | 2.275 | 0.343 | 0.268 | 0.065 |                                                                                                                       |
|              |                                                                             | 90    | 3.032 | 2.995 | 2.275 | 0.361 | 0.293 | 0.065 |                                                                                                                       |
|              |                                                                             | 100   | 3.051 | 3.033 | 2.275 | 0.377 | 0.316 | 0.065 |                                                                                                                       |
|              |                                                                             | 110   | 3.103 | 3.067 | 2.275 | 0.390 | 0.337 | 0.065 |                                                                                                                       |
|              |                                                                             | 120   | 3.106 | 3.098 | 2.275 | 0.401 | 0.357 | 0.065 |                                                                                                                       |
|              |                                                                             | 130   | 3.152 | 3.126 | 2.275 | 0.411 | 0.375 | 0.065 |                                                                                                                       |
|              |                                                                             | 140   | 3.139 | 3.151 | 2.275 | 0.418 | 0.392 | 0.065 |                                                                                                                       |
|              |                                                                             | 150   | 3.158 | 3.174 | 2.275 | 0.425 | 0.409 | 0.065 |                                                                                                                       |
|              |                                                                             | 160   | 3.205 | 3.195 | 2.275 | 0.431 | 0.424 | 0.065 |                                                                                                                       |
|              |                                                                             | 170   | 3.213 | 3.214 | 2.275 | 0.435 | 0.438 | 0.065 |                                                                                                                       |
|              |                                                                             | 180   | 3.215 | 3.231 | 2.275 | 0.439 | 0.451 | 0.065 |                                                                                                                       |
|              |                                                                             | 190   | 3.260 | 3.246 | 2.275 | 0.443 | 0.463 | 0.065 |                                                                                                                       |
|              |                                                                             | 200   | 3.263 | 3.261 | 2.275 | 0.446 | 0.475 | 0.065 |                                                                                                                       |
|              |                                                                             | 210   | 3.268 | 3.274 | 2.275 | 0.448 | 0.485 | 0.065 |                                                                                                                       |
|              |                                                                             | 220   | 3.303 | 3.286 | 2.275 | 0.450 | 0.495 | 0.065 |                                                                                                                       |
|              |                                                                             | 230   | 3.284 | 3.297 | 2.275 | 0.452 | 0.505 | 0.065 |                                                                                                                       |
|              |                                                                             | 240   | 3.301 | 3.307 | 2.275 | 0.453 | 0.513 | 0.065 |                                                                                                                       |
| 250          | 3.282                                                                       | 3.316 | 2.275 | 0.454 | 0.521 | 0.065 |       |       |                                                                                                                       |
| 260          | 3.327                                                                       | 3.325 | 2.275 | 0.455 | 0.529 | 0.065 |       |       |                                                                                                                       |
| 270          | 3.344                                                                       | 3.333 | 2.275 | 0.456 | 0.536 | 0.065 |       |       |                                                                                                                       |
| 280          | 3.359                                                                       | 3.340 | 2.275 | 0.457 | 0.543 | 0.065 |       |       |                                                                                                                       |
| 290          | 3.339                                                                       | 3.347 | 2.275 | 0.457 | 0.549 | 0.065 |       |       |                                                                                                                       |
| 300          | 3.353                                                                       | 3.353 | 2.275 | 0.458 | 0.555 | 0.065 |       |       |                                                                                                                       |



|  |  |     |       |       |       |       |       |       |  |
|--|--|-----|-------|-------|-------|-------|-------|-------|--|
|  |  | 310 | 3.347 | 3.359 | 2.275 | 0.458 | 0.560 | 0.065 |  |
|  |  | 320 | 3.336 | 3.364 | 2.275 | 0.459 | 0.565 | 0.065 |  |
|  |  | 330 | 3.373 | 3.369 | 2.275 | 0.459 | 0.570 | 0.065 |  |
|  |  | 340 | 3.377 | 3.374 | 2.275 | 0.459 | 0.574 | 0.065 |  |
|  |  | 350 | 3.370 | 3.378 | 2.275 | 0.460 | 0.578 | 0.065 |  |
|  |  | 360 | 3.360 | 3.382 | 2.275 | 0.460 | 0.582 | 0.065 |  |
|  |  | 370 | 3.376 | 3.386 | 2.275 | 0.460 | 0.586 | 0.065 |  |
|  |  | 380 | 3.377 | 3.390 | 2.275 | 0.460 | 0.589 | 0.065 |  |
|  |  | 390 | 3.392 | 3.393 | 2.275 | 0.460 | 0.592 | 0.065 |  |
|  |  | 400 | 3.401 | 3.396 | 2.275 | 0.460 | 0.595 | 0.065 |  |
|  |  | 410 | 3.389 | 3.399 | 2.275 | 0.460 | 0.598 | 0.065 |  |
|  |  | 420 | 3.358 | 3.401 | 2.275 | 0.460 | 0.600 | 0.065 |  |
|  |  | 430 | 3.397 | 3.404 | 2.275 | 0.460 | 0.603 | 0.065 |  |
|  |  | 440 | 3.409 | 3.406 | 2.275 | 0.461 | 0.605 | 0.065 |  |
|  |  | 450 | 3.378 | 3.408 | 2.275 | 0.461 | 0.607 | 0.065 |  |
|  |  | 460 | 3.415 | 3.410 | 2.275 | 0.461 | 0.609 | 0.065 |  |
|  |  | 470 | 3.390 | 3.412 | 2.275 | 0.461 | 0.611 | 0.065 |  |
|  |  | 480 | 3.393 | 3.413 | 2.275 | 0.461 | 0.612 | 0.065 |  |
|  |  | 490 | 3.390 | 3.415 | 2.275 | 0.461 | 0.614 | 0.065 |  |
|  |  | 500 | 3.408 | 3.417 | 2.275 | 0.461 | 0.615 | 0.065 |  |
|  |  | 510 | 3.410 | 3.418 | 2.275 | 0.461 | 0.617 | 0.065 |  |
|  |  | 520 | 3.402 | 3.419 | 2.275 | 0.461 | 0.618 | 0.065 |  |
|  |  | 530 | 3.421 | 3.420 | 2.275 | 0.461 | 0.619 | 0.065 |  |
|  |  | 540 | 3.410 | 3.422 | 2.275 | 0.461 | 0.620 | 0.065 |  |
|  |  | 550 | 3.406 | 3.423 | 2.275 | 0.461 | 0.621 | 0.065 |  |
|  |  | 560 | 3.427 | 3.424 | 2.275 | 0.461 | 0.622 | 0.065 |  |
|  |  | 570 | 3.397 | 3.424 | 2.275 | 0.461 | 0.623 | 0.065 |  |
|  |  | 580 | 3.427 | 3.425 | 2.275 | 0.461 | 0.624 | 0.065 |  |
|  |  | 590 | 3.419 | 3.426 | 2.275 | 0.461 | 0.625 | 0.065 |  |
|  |  | 600 | 3.404 | 3.427 | 2.275 | 0.461 | 0.626 | 0.065 |  |

## 9 Dataset of multiplexed immunosensing (three biomarkers in serum)

Following the experimental protocol in **Section 7**, the kinetic processes of 64 serum samples were measured. In the measurement of each mixture sample, a GFET device was disposably used (#S1 – #S64).

Corresponding to **Figure 5a** in the main text, the detailed experimental data and the numerical fitting results are presented in **Figure S7** and **Table S11**. Herein, we keep using the kinetic parameters in **Section 5**  $k_a^{(\text{CEA})} = 357053.24 \text{ M}^{-1}\text{s}^{-1}$ ,  $k_d^{(\text{CEA})} = 0.0003055 \text{ s}^{-1}$ ,  $k_a^{(\text{AFP})} = 99465.16 \text{ M}^{-1}\text{s}^{-1}$ ,  $k_d^{(\text{AFP})} = 0.0008749 \text{ s}^{-1}$ ,  $k_a^{(\text{PTH})} = 1020100.24 \text{ M}^{-1}\text{s}^{-1}$  and  $k_d^{(\text{PTH})} = 0.0023879 \text{ s}^{-1}$  as known conditions. Based on the fitting function Eq. (2) in the main text<sup>6</sup>, the concentrations of CEA, AFP and PTH in each mixture sample were retrieved as  $\tilde{c}^{(\text{CEA})}$ ,  $\tilde{c}^{(\text{AFP})}$  and  $\tilde{c}^{(\text{PTH})}$ , for the comparison with their true values  $c^{(\text{CEA})}$ ,  $c^{(\text{AFP})}$  and  $c^{(\text{PTH})}$ .

**GFET #S1**

CEA 2 nM; AFP 5 nM; PTH 2 nM

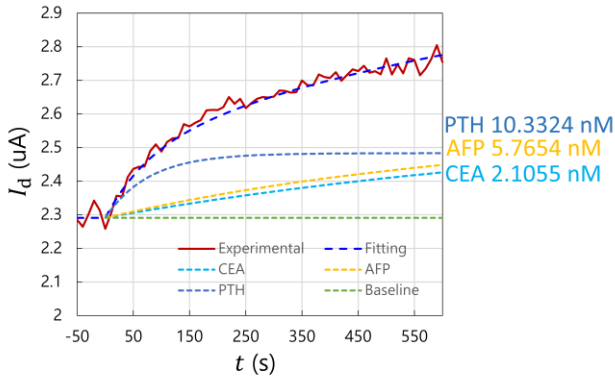**GFET #S2**

CEA 2 nM; AFP 5 nM; PTH 5 nM

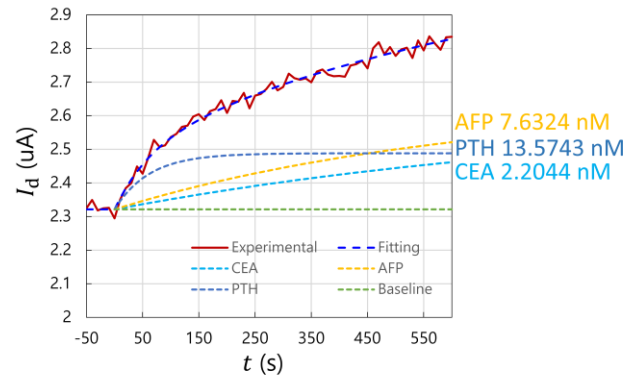**GFET #S3**

CEA 2 nM; AFP 5 nM; PTH 20 nM

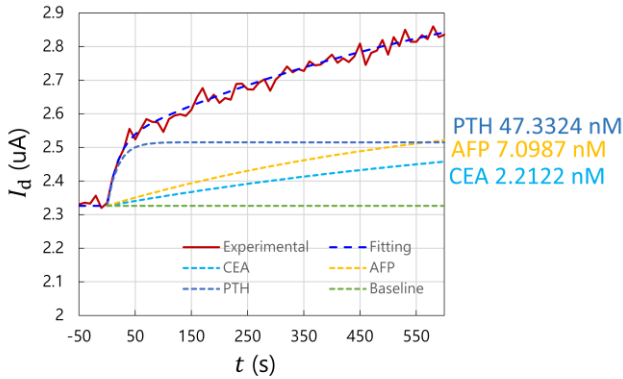**GFET #S4**

CEA 2 nM; AFP 5 nM; PTH 50 nM

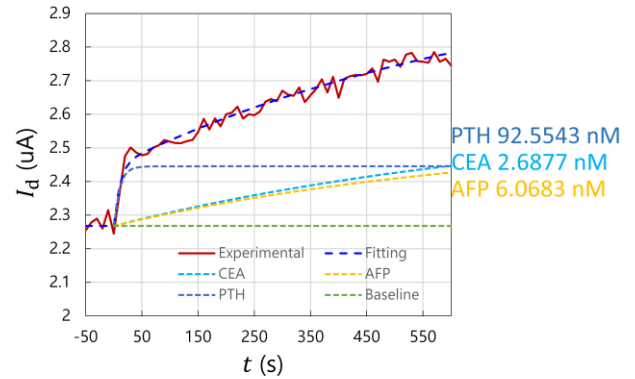**GFET #S5**

CEA 2 nM; AFP 20 nM; PTH 2 nM

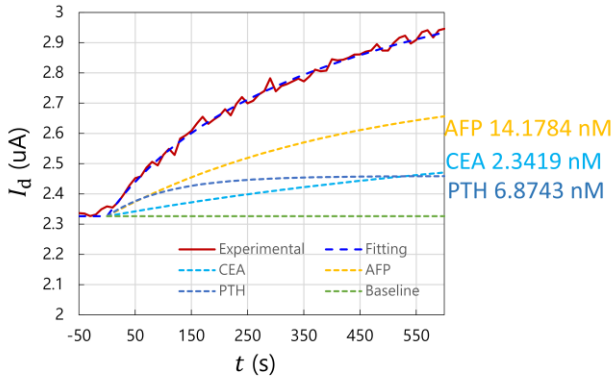**GFET #S6**

CEA 2 nM; AFP 20 nM; PTH 5 nM

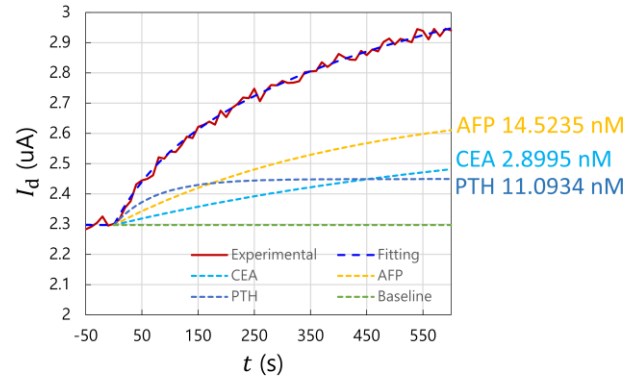**GFET #S7**

CEA 2 nM; AFP 20 nM; PTH 20 nM

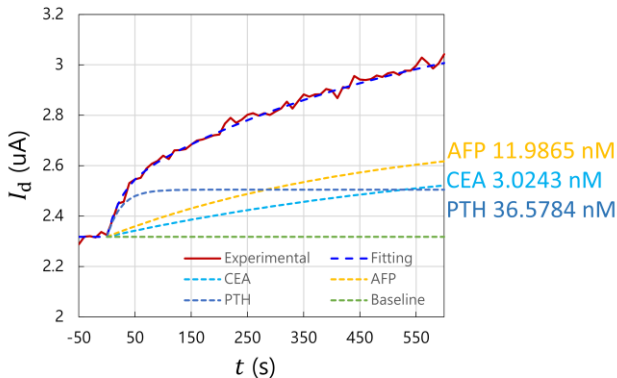**GFET #S8**

CEA 2 nM; AFP 20 nM; PTH 50 nM

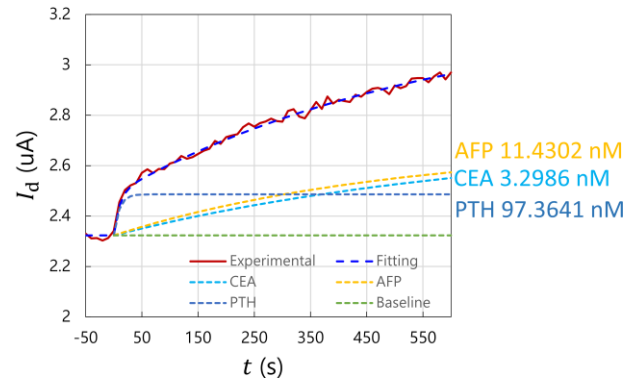

**GFET #S9**

CEA 2 nM; AFP 50 nM; PTH 2 nM

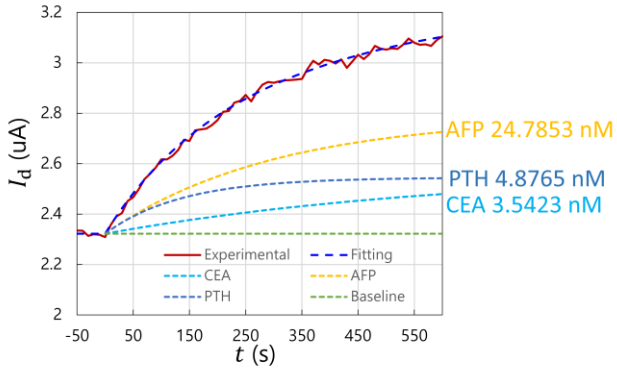**GFET #S10**

CEA 2 nM; AFP 50 nM; PTH 5 nM

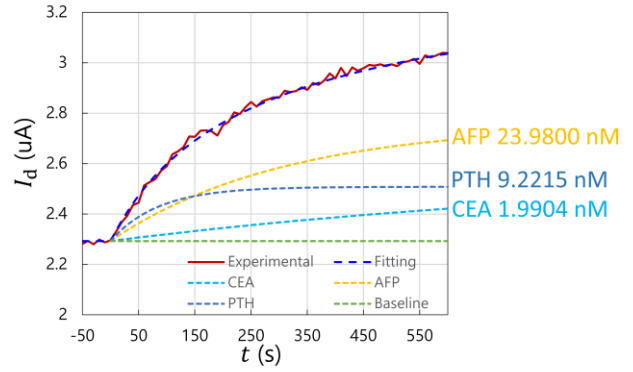**GFET #S11**

CEA 2 nM; AFP 50 nM; PTH 20 nM

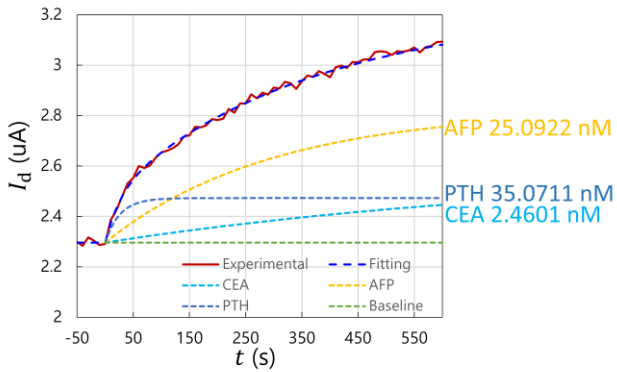**GFET #S12**

CEA 2 nM; AFP 50 nM; PTH 50 nM

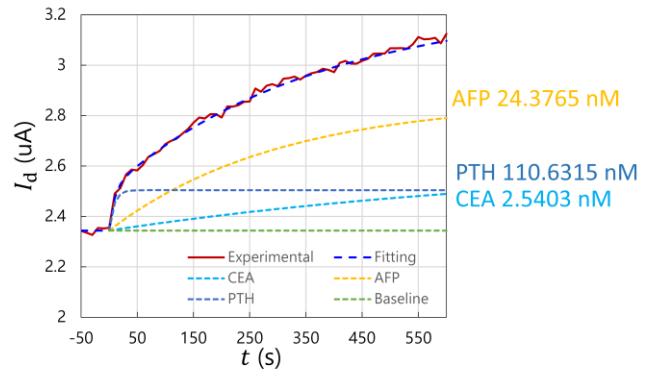**GFET #S13**

CEA 2 nM; AFP 100 nM; PTH 2 nM

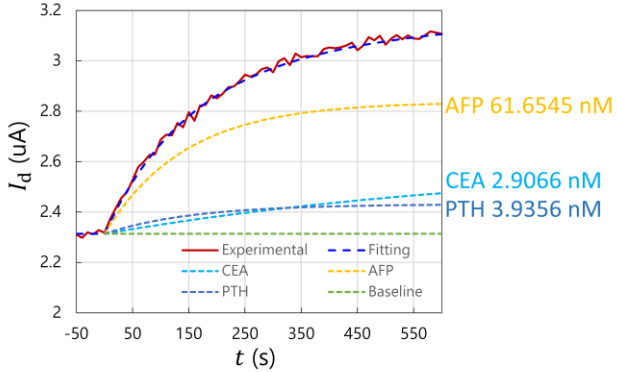**GFET #S14**

CEA 2 nM; AFP 100 nM; PTH 5 nM

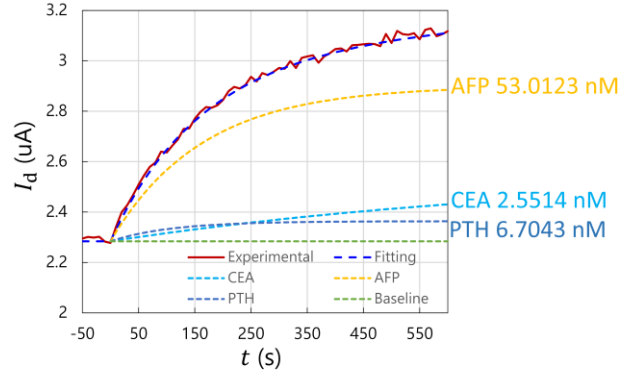**GFET #S15**

CEA 2 nM; AFP 100 nM; PTH 20 nM

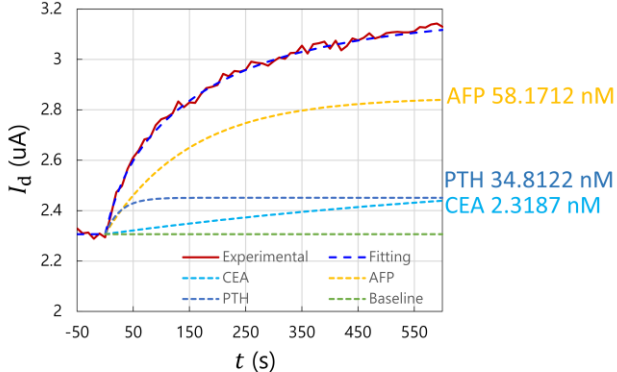**GFET #S16**

CEA 2 nM; AFP 100 nM; PTH 50 nM

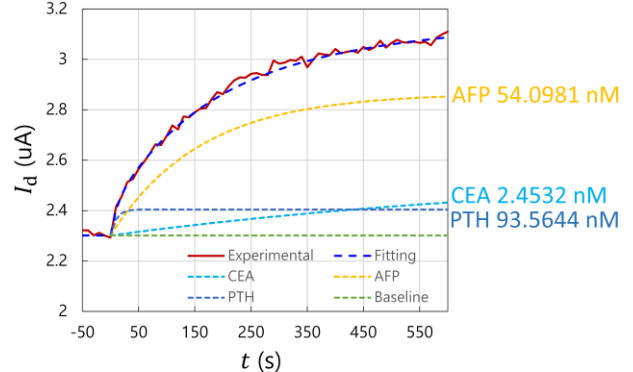

**GFET #S17**

CEA 5 nM; AFP 5 nM; PTH 2 nM

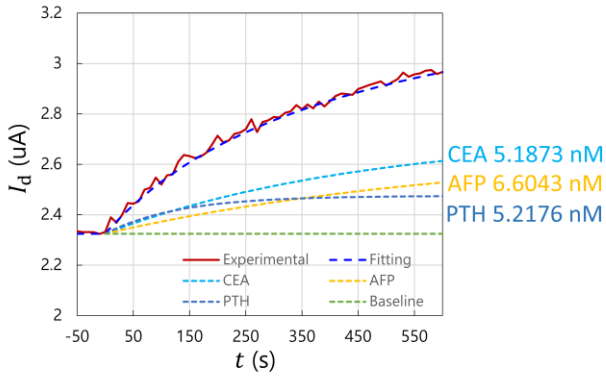**GFET #S18**

CEA 5 nM; AFP 5 nM; PTH 5 nM

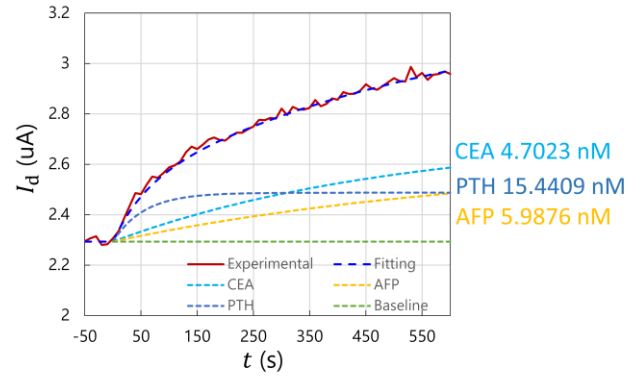**GFET #S19**

CEA 5 nM; AFP 5 nM; PTH 20 nM

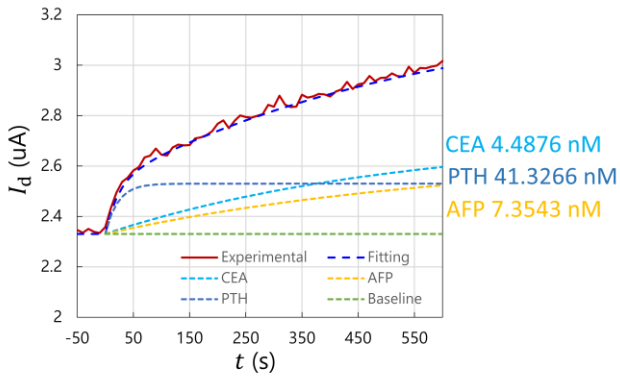**GFET #S20**

CEA 5 nM; AFP 5 nM; PTH 50 nM

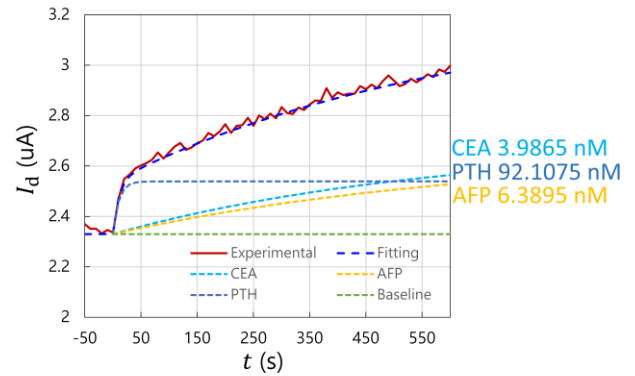**GFET #S21**

CEA 5 nM; AFP 20 nM; PTH 2 nM

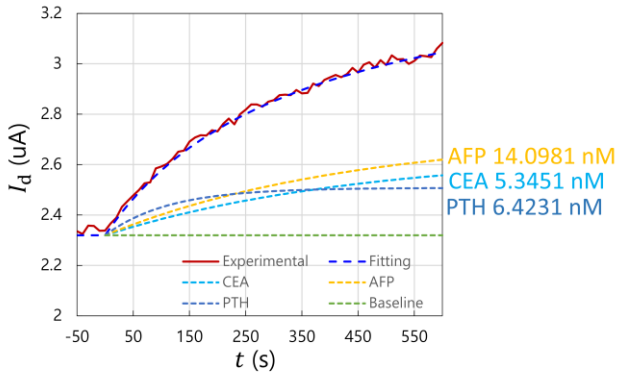**GFET #S22**

CEA 5 nM; AFP 20 nM; PTH 5 nM

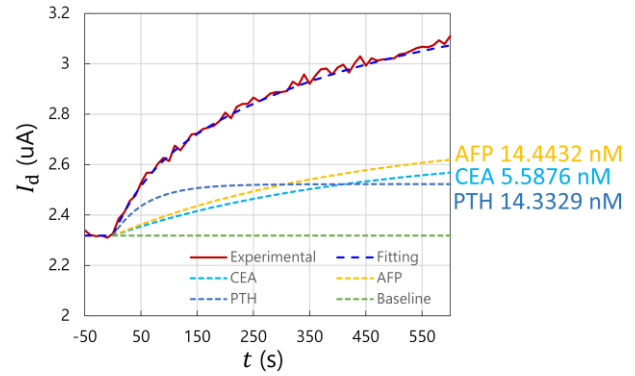**GFET #S23**

CEA 5 nM; AFP 20 nM; PTH 20 nM

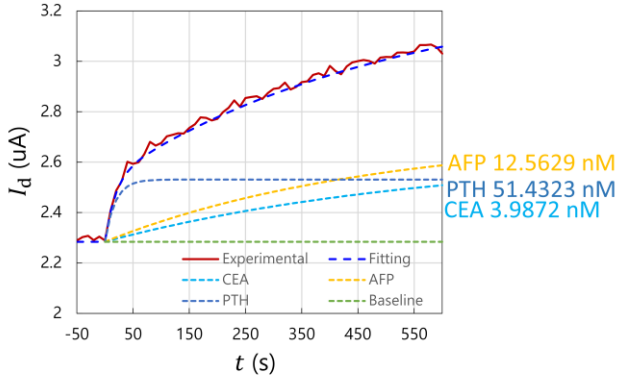**GFET #S24**

CEA 5 nM; AFP 20 nM; PTH 50 nM

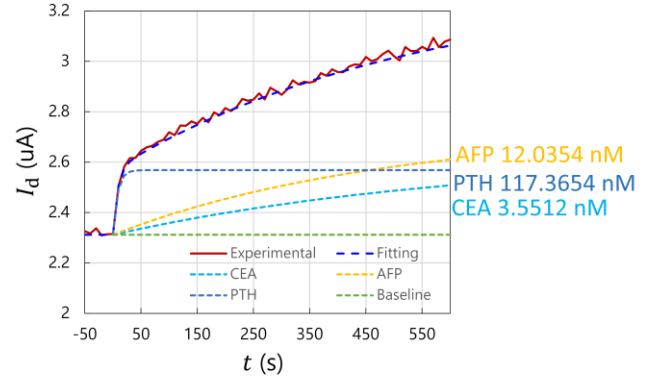

**GFET #S25**

CEA 5 nM; AFP 50 nM; PTH 2 nM

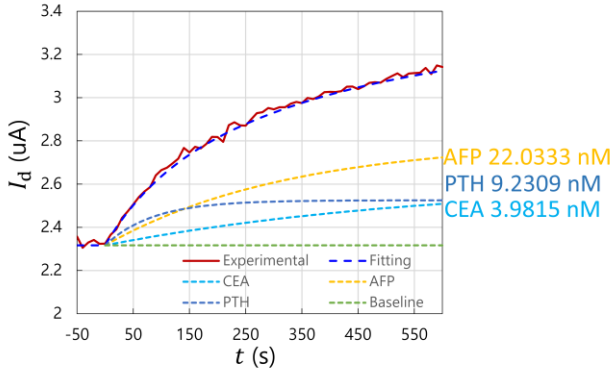**GFET #S26**

CEA 5 nM; AFP 50 nM; PTH 5 nM

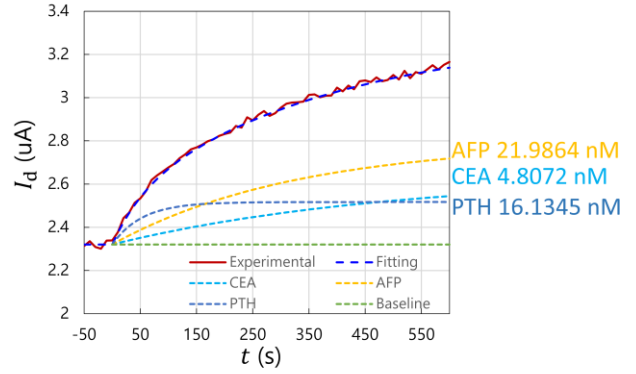**GFET #S27**

CEA 5 nM; AFP 50 nM; PTH 20 nM

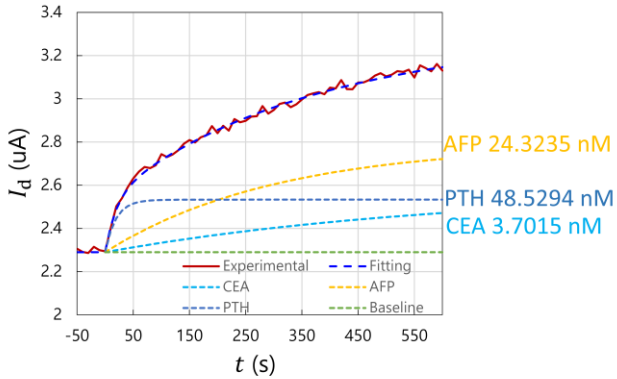**GFET #S28**

CEA 5 nM; AFP 50 nM; PTH 50 nM

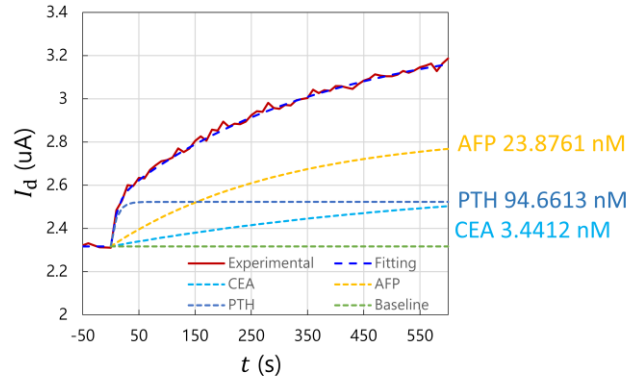**GFET #S29**

CEA 5 nM; AFP 100 nM; PTH 2 nM

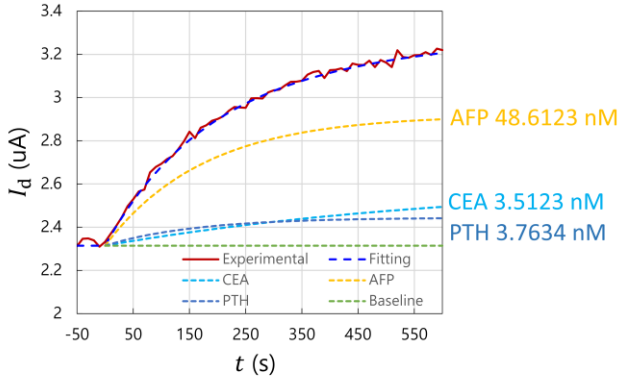**GFET #S30**

CEA 5 nM; AFP 100 nM; PTH 5 nM

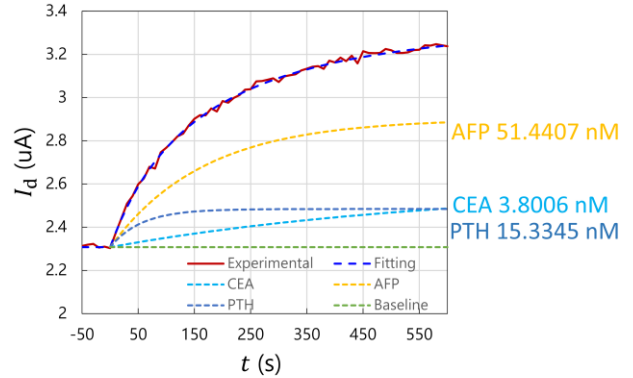**GFET #S31**

CEA 5 nM; AFP 100 nM; PTH 20 nM

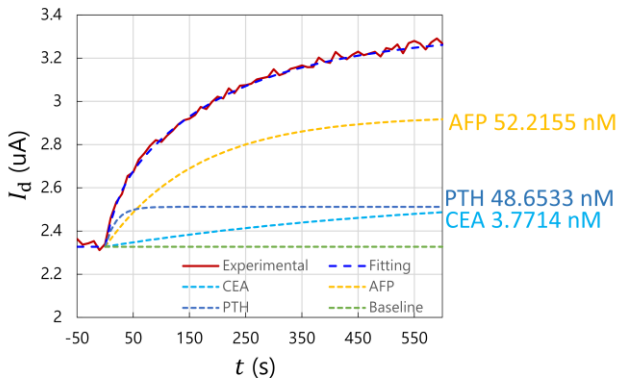**GFET #S32**

CEA 5 nM; AFP 100 nM; PTH 50 nM

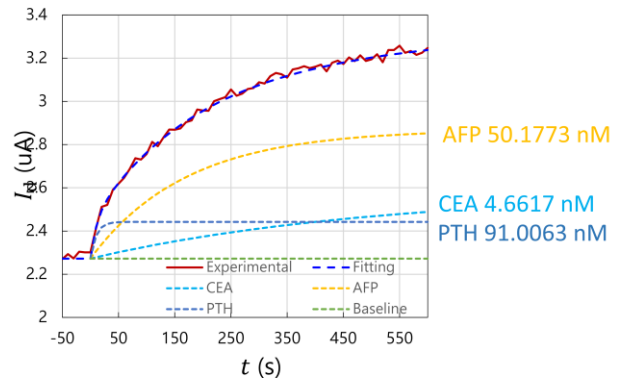

**GFET #S33**

CEA 20 nM; AFP 5 nM; PTH 2 nM

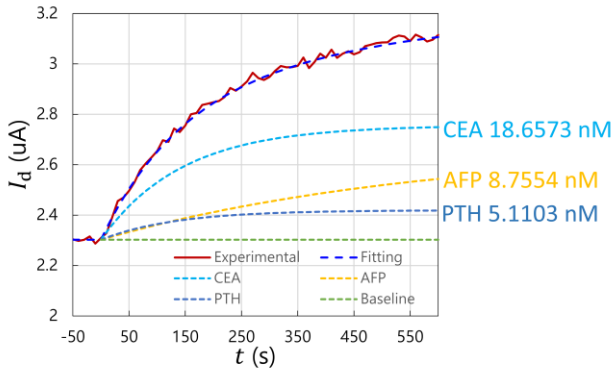**GFET #S34**

CEA 20 nM; AFP 5 nM; PTH 5 nM

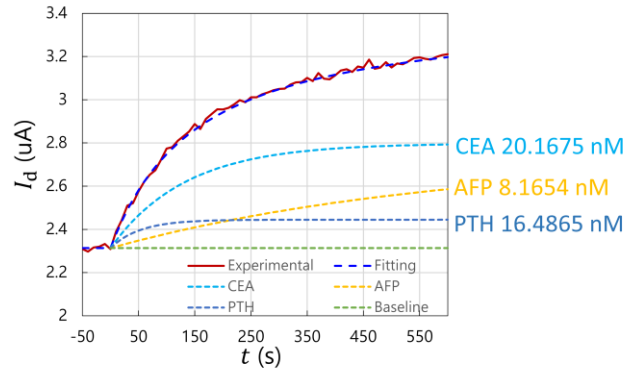**GFET #S35**

CEA 20 nM; AFP 5 nM; PTH 20 nM

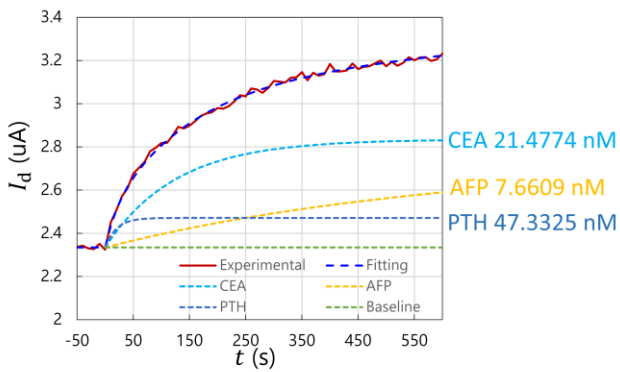**GFET #S36**

CEA 20 nM; AFP 5 nM; PTH 50 nM

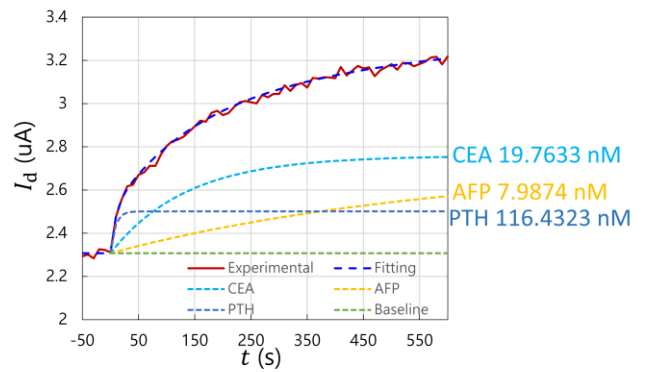**GFET #S37**

CEA 20 nM; AFP 20 nM; PTH 2 nM

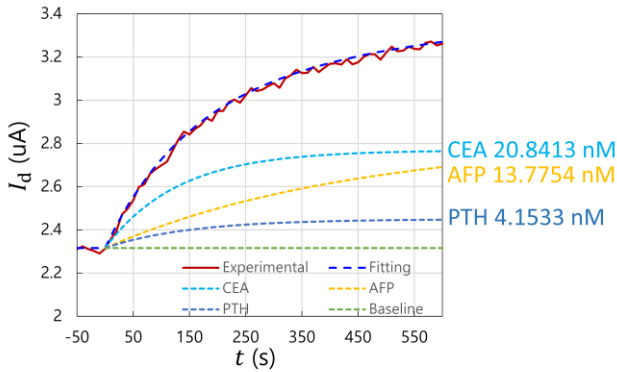**GFET #S38**

CEA 20 nM; AFP 20 nM; PTH 5 nM

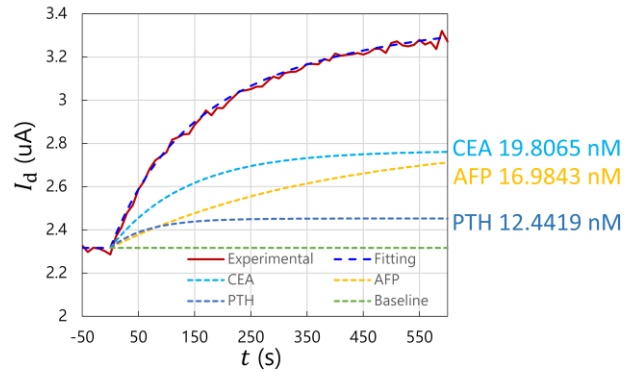**GFET #S39**

CEA 20 nM; AFP 20 nM; PTH 20 nM

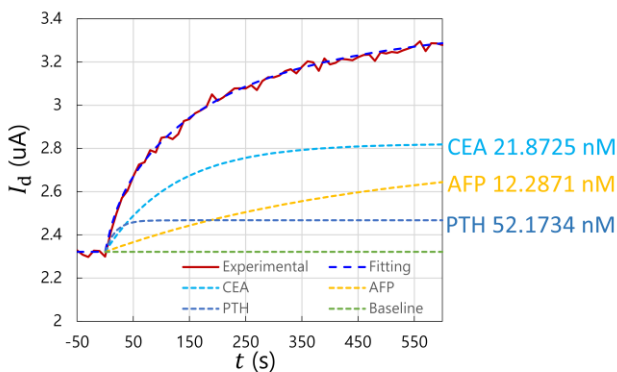**GFET #S40**

CEA 20 nM; AFP 20 nM; PTH 50 nM

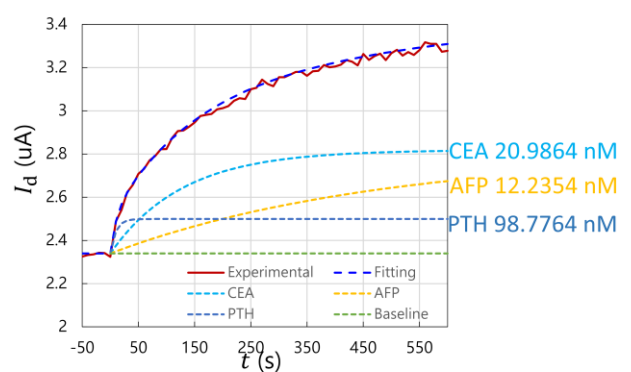

**GFET #S41**

CEA 20 nM; AFP 50 nM; PTH 2 nM

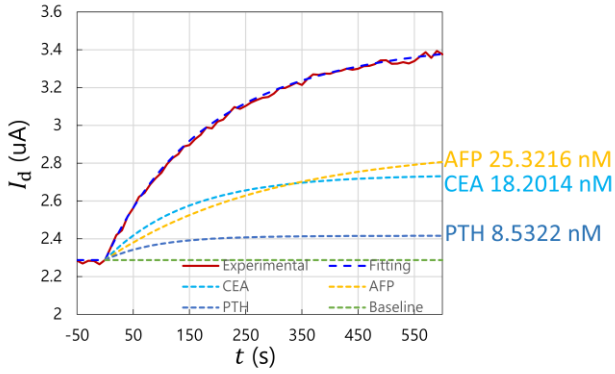**GFET #S42**

CEA 20 nM; AFP 50 nM; PTH 5 nM

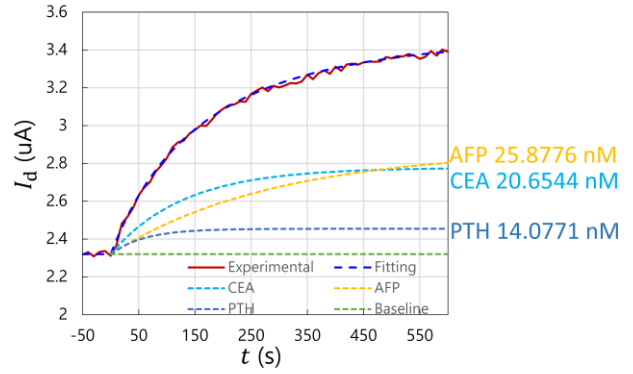**GFET #S43**

CEA 20 nM; AFP 50 nM; PTH 20 nM

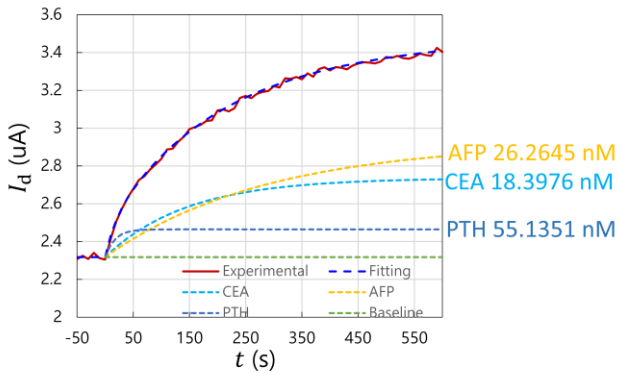**GFET #S44**

CEA 20 nM; AFP 50 nM; PTH 50 nM

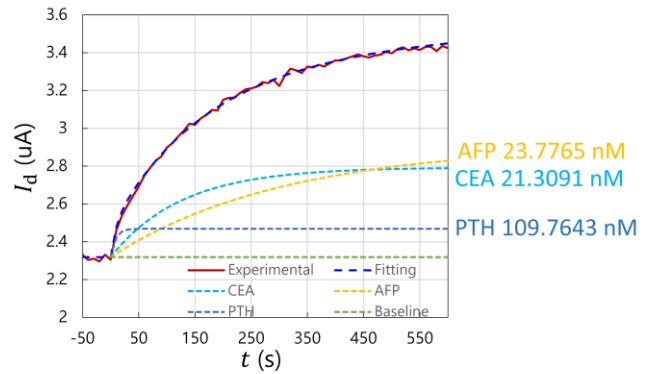**GFET #S45**

CEA 20 nM; AFP 100 nM; PTH 2 nM

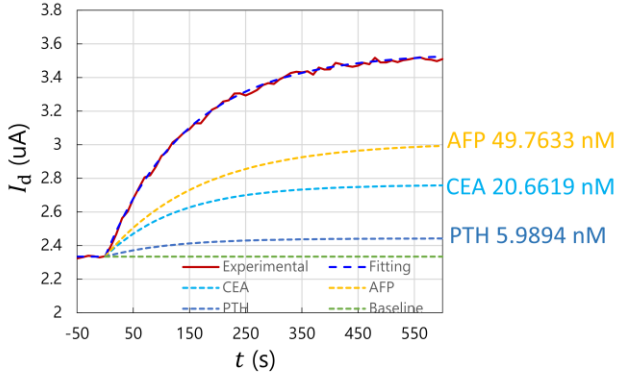**GFET #S46**

CEA 20 nM; AFP 100 nM; PTH 5 nM

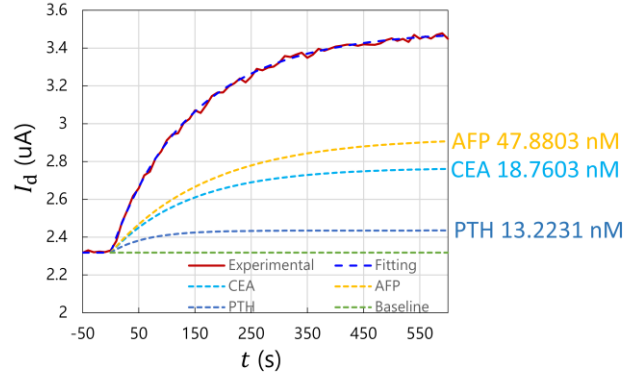**GFET #S47**

CEA 20 nM; AFP 100 nM; PTH 20 nM

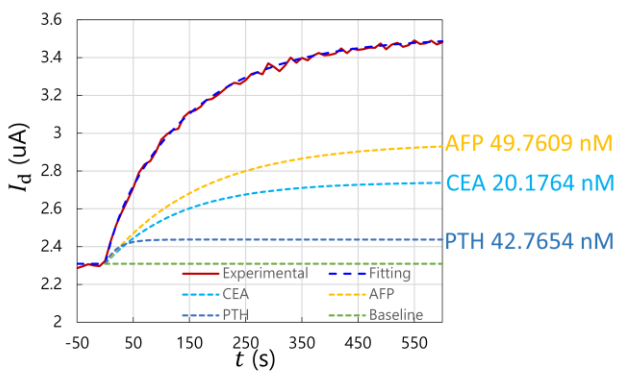**GFET #S48**

CEA 20 nM; AFP 100 nM; PTH 50 nM

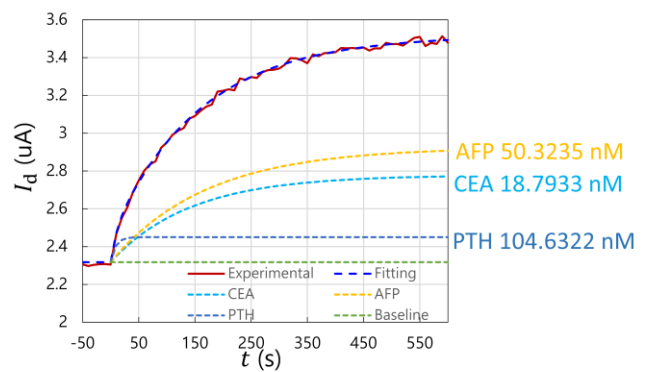



**GFET #S49**

CEA 50 nM; AFP 5 nM; PTH 2 nM

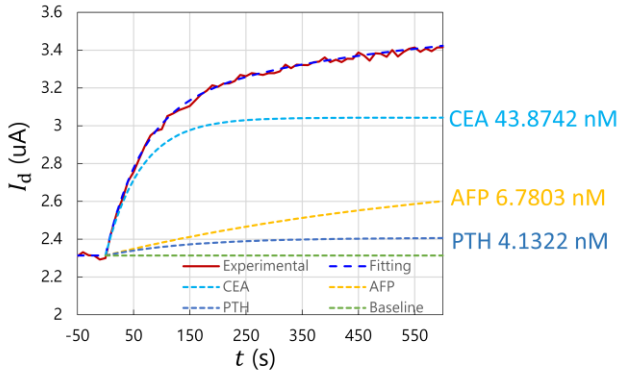**GFET #S50**

CEA 50 nM; AFP 5 nM; PTH 5 nM

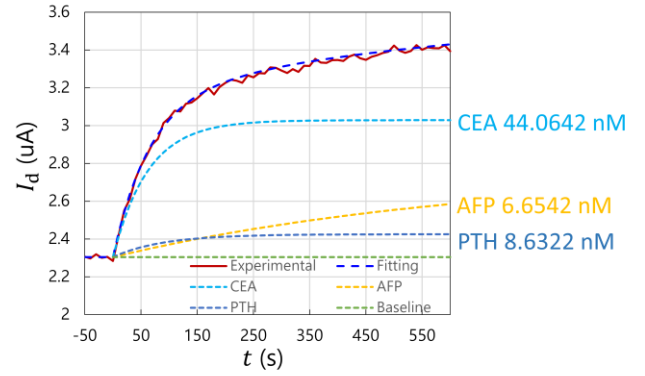**GFET #S51**

CEA 50 nM; AFP 5 nM; PTH 20 nM

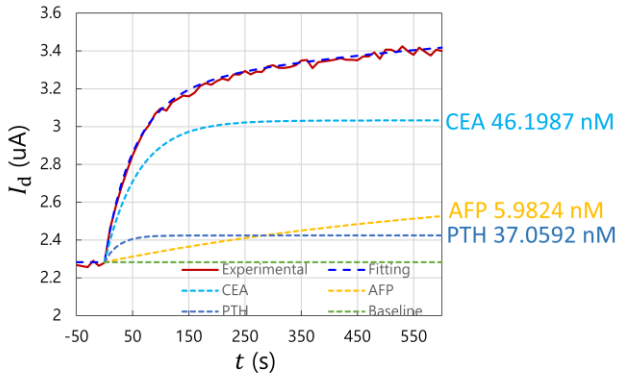**GFET #S52**

CEA 50 nM; AFP 5 nM; PTH 50 nM

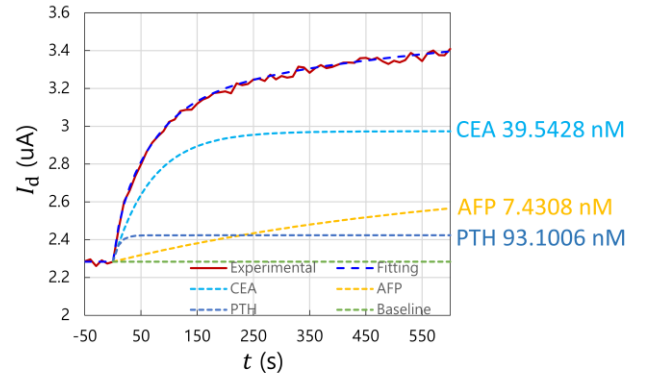**GFET #S53**

CEA 50 nM; AFP 20 nM; PTH 2 nM

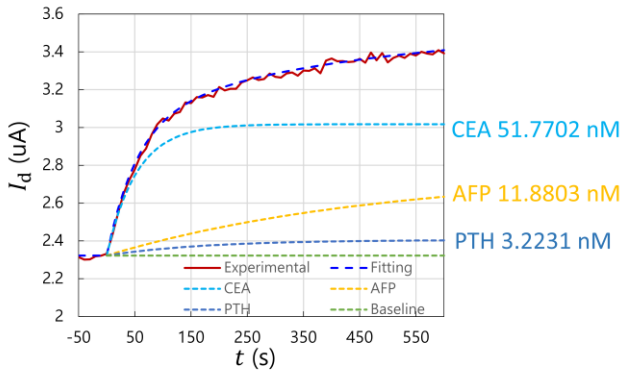**GFET #S54**

CEA 50 nM; AFP 20 nM; PTH 5 nM

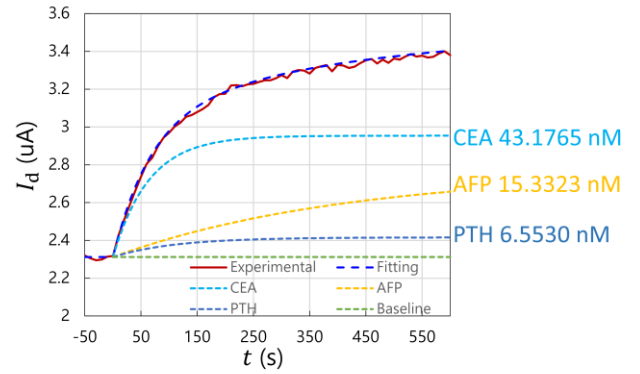**GFET #S55**

CEA 50 nM; AFP 20 nM; PTH 20 nM

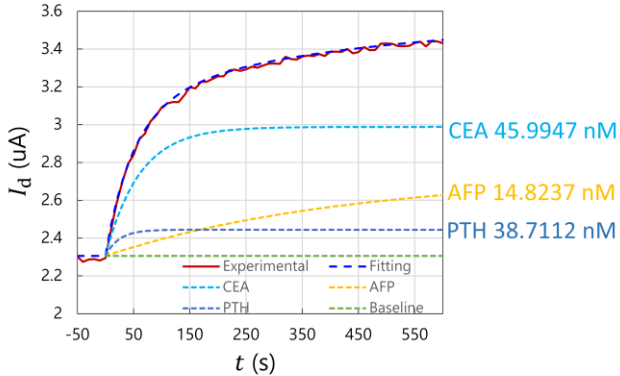**GFET #S56**

CEA 50 nM; AFP 20 nM; PTH 50 nM

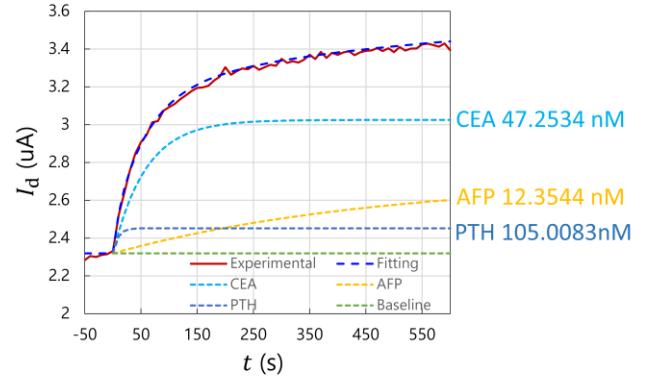

**GFET #S57**

CEA 50 nM; AFP 50 nM; PTH 2 nM

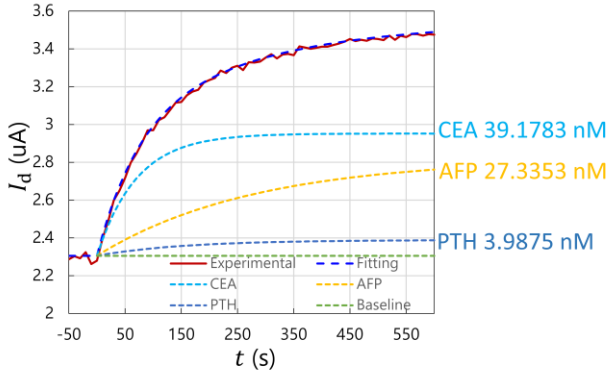**GFET #S58**

CEA 50 nM; AFP 50 nM; PTH 5 nM

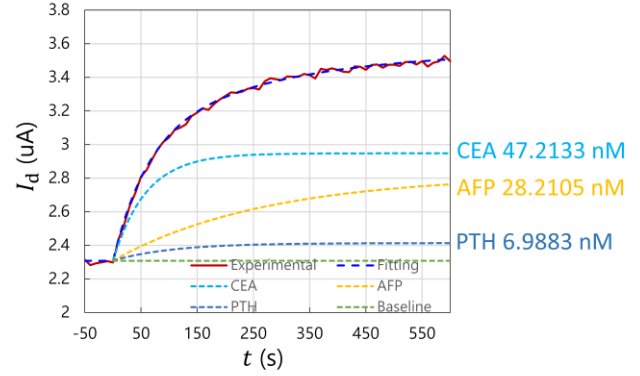**GFET #S59**

CEA 50 nM; AFP 50 nM; PTH 20 nM

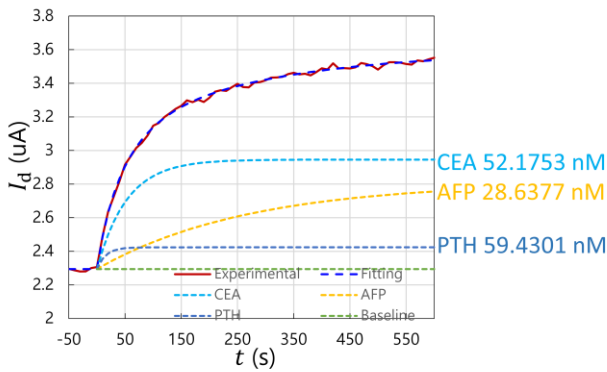**GFET #S60**

CEA 50 nM; AFP 50 nM; PTH 50 nM

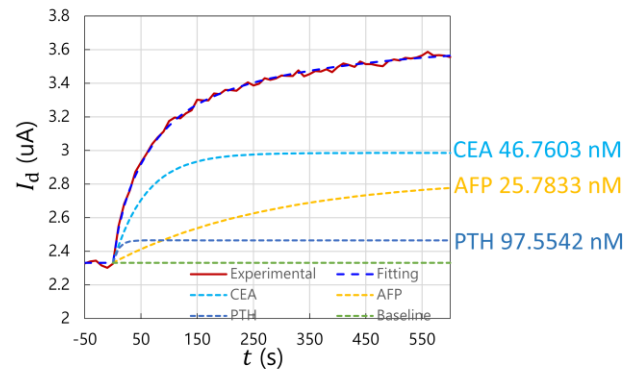**GFET #S61**

CEA 50 nM; AFP 100 nM; PTH 2 nM

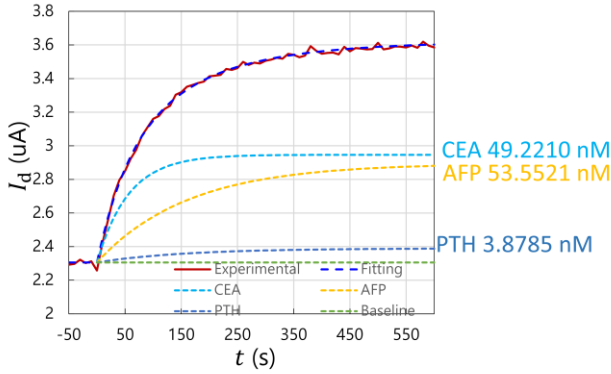**GFET #S62**

CEA 50 nM; AFP 100 nM; PTH 5 nM

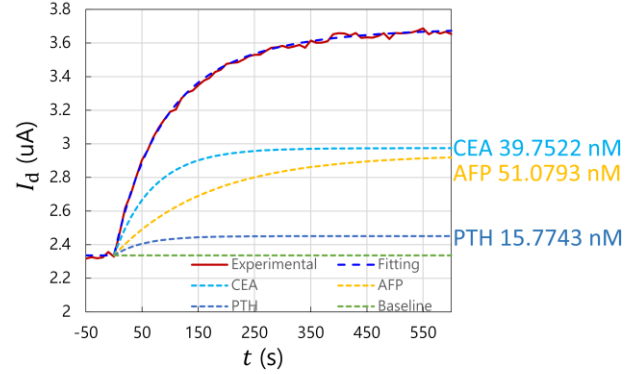**GFET #S63**

CEA 50 nM; AFP 100 nM; PTH 20 nM

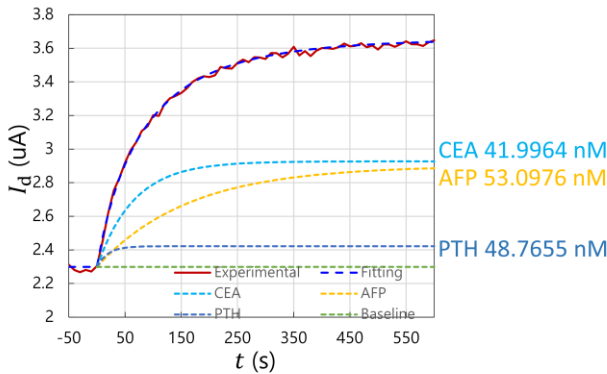**GFET #S64**

CEA 50 nM; AFP 100 nM; PTH 50 nM

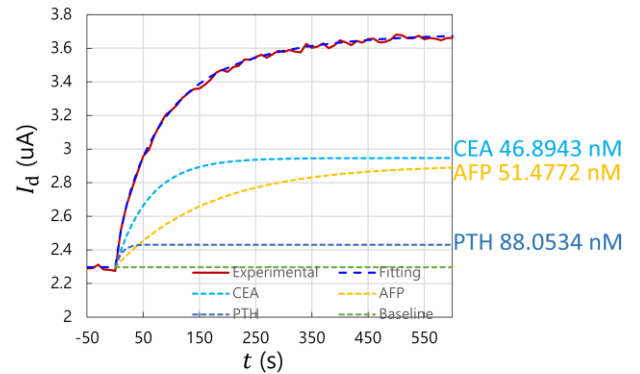**Figure S7.** Kinetic processes of 64 mixture samples in serum.

**Table S11.** Kinetic processes of 64 serum samples and numerical fitting results corresponding to **Figure S7**. The estimated kinetic parameters  $k_a^{(CEA)} = 357053.24 \text{ M}^{-1}\text{s}^{-1}$ ,  $k_d^{(CEA)} = 0.0003055 \text{ s}^{-1}$ ,  $k_a^{(AFP)} = 99465.16 \text{ M}^{-1}\text{s}^{-1}$ ,  $k_d^{(AFP)} = 0.0008749 \text{ s}^{-1}$ ,  $k_a^{(PTH)} = 1020100.24 \text{ M}^{-1}\text{s}^{-1}$  and  $k_d^{(PTH)} = 0.0023879 \text{ s}^{-1}$  are used as known conditions to estimate the component concentrations  $\tilde{c}^{(CEA)}$ ,  $\tilde{c}^{(AFP)}$  and  $\tilde{c}^{(PTH)}$ .

| Device number | Mixture components                                                                     | Time, $t$ (s) | Exp. Results, $I_d$ ( $\mu\text{A}$ ) | Fitting results                 |                               |                       |                       |                       |                                                                                                                                                  |
|---------------|----------------------------------------------------------------------------------------|---------------|---------------------------------------|---------------------------------|-------------------------------|-----------------------|-----------------------|-----------------------|--------------------------------------------------------------------------------------------------------------------------------------------------|
|               |                                                                                        |               |                                       | $\tilde{I}_d$ ( $\mu\text{A}$ ) | Component contributions       |                       |                       |                       | Estimated conc. of components                                                                                                                    |
|               |                                                                                        |               |                                       |                                 | DC baseline ( $\mu\text{A}$ ) | CEA ( $\mu\text{A}$ ) | AFP ( $\mu\text{A}$ ) | PTH ( $\mu\text{A}$ ) |                                                                                                                                                  |
| GFET #S1      | $c^{(CEA)} = 2 \text{ nM}$<br>$c^{(AFP)} = 5 \text{ nM}$<br>$c^{(PTH)} = 2 \text{ nM}$ | -50           | 2.285                                 | 2.291                           | -                             | -                     | -                     | -                     | $\tilde{c}^{(CEA)} \approx 2.1055 \text{ nM}$<br>$\tilde{c}^{(AFP)} \approx 5.7654 \text{ nM}$<br>$\tilde{c}^{(PTH)} \approx 10.3324 \text{ nM}$ |
|               |                                                                                        | -40           | 2.264                                 | 2.291                           |                               |                       |                       |                       |                                                                                                                                                  |
|               |                                                                                        | -30           | 2.300                                 | 2.291                           |                               |                       |                       |                       |                                                                                                                                                  |
|               |                                                                                        | -20           | 2.342                                 | 2.291                           |                               |                       |                       |                       |                                                                                                                                                  |
|               |                                                                                        | -10           | 2.314                                 | 2.291                           |                               |                       |                       |                       |                                                                                                                                                  |
|               |                                                                                        | 0             | 2.258                                 | 2.291                           | 2.291                         | 0.000                 | 0.000                 | 0.000                 |                                                                                                                                                  |
|               |                                                                                        | 10            | 2.302                                 | 2.321                           | 2.291                         | 0.003                 | 0.004                 | 0.023                 |                                                                                                                                                  |
|               |                                                                                        | 20            | 2.356                                 | 2.349                           | 2.291                         | 0.006                 | 0.008                 | 0.044                 |                                                                                                                                                  |
|               |                                                                                        | 30            | 2.355                                 | 2.373                           | 2.291                         | 0.009                 | 0.012                 | 0.062                 |                                                                                                                                                  |
|               |                                                                                        | 40            | 2.412                                 | 2.396                           | 2.291                         | 0.012                 | 0.015                 | 0.078                 |                                                                                                                                                  |
|               |                                                                                        | 50            | 2.436                                 | 2.416                           | 2.291                         | 0.015                 | 0.019                 | 0.092                 |                                                                                                                                                  |
|               |                                                                                        | 60            | 2.443                                 | 2.435                           | 2.291                         | 0.018                 | 0.023                 | 0.104                 |                                                                                                                                                  |
|               |                                                                                        | 70            | 2.444                                 | 2.452                           | 2.291                         | 0.021                 | 0.026                 | 0.114                 |                                                                                                                                                  |
|               |                                                                                        | 80            | 2.490                                 | 2.468                           | 2.291                         | 0.023                 | 0.030                 | 0.124                 |                                                                                                                                                  |
|               |                                                                                        | 90            | 2.509                                 | 2.482                           | 2.291                         | 0.026                 | 0.033                 | 0.132                 |                                                                                                                                                  |
|               |                                                                                        | 100           | 2.488                                 | 2.496                           | 2.291                         | 0.029                 | 0.037                 | 0.139                 |                                                                                                                                                  |
|               |                                                                                        | 110           | 2.516                                 | 2.508                           | 2.291                         | 0.032                 | 0.040                 | 0.146                 |                                                                                                                                                  |
|               |                                                                                        | 120           | 2.528                                 | 2.520                           | 2.291                         | 0.034                 | 0.043                 | 0.151                 |                                                                                                                                                  |
|               |                                                                                        | 130           | 2.529                                 | 2.531                           | 2.291                         | 0.037                 | 0.046                 | 0.156                 |                                                                                                                                                  |
|               |                                                                                        | 140           | 2.570                                 | 2.541                           | 2.291                         | 0.040                 | 0.050                 | 0.161                 |                                                                                                                                                  |
|               |                                                                                        | 150           | 2.563                                 | 2.551                           | 2.291                         | 0.042                 | 0.053                 | 0.165                 |                                                                                                                                                  |
|               |                                                                                        | 160           | 2.573                                 | 2.560                           | 2.291                         | 0.045                 | 0.056                 | 0.168                 |                                                                                                                                                  |
|               |                                                                                        | 170           | 2.582                                 | 2.568                           | 2.291                         | 0.047                 | 0.059                 | 0.171                 |                                                                                                                                                  |
|               |                                                                                        | 180           | 2.611                                 | 2.577                           | 2.291                         | 0.050                 | 0.062                 | 0.173                 |                                                                                                                                                  |
|               |                                                                                        | 190           | 2.612                                 | 2.584                           | 2.291                         | 0.052                 | 0.065                 | 0.176                 |                                                                                                                                                  |
|               |                                                                                        | 200           | 2.612                                 | 2.592                           | 2.291                         | 0.055                 | 0.068                 | 0.178                 |                                                                                                                                                  |
|               |                                                                                        | 210           | 2.620                                 | 2.599                           | 2.291                         | 0.057                 | 0.071                 | 0.180                 |                                                                                                                                                  |
|               |                                                                                        | 220           | 2.650                                 | 2.606                           | 2.291                         | 0.060                 | 0.074                 | 0.181                 |                                                                                                                                                  |
|               |                                                                                        | 230           | 2.630                                 | 2.612                           | 2.291                         | 0.062                 | 0.077                 | 0.182                 |                                                                                                                                                  |
|               |                                                                                        | 240           | 2.645                                 | 2.619                           | 2.291                         | 0.065                 | 0.080                 | 0.184                 |                                                                                                                                                  |
|               |                                                                                        | 250           | 2.617                                 | 2.625                           | 2.291                         | 0.067                 | 0.082                 | 0.185                 |                                                                                                                                                  |
|               |                                                                                        | 260           | 2.632                                 | 2.631                           | 2.291                         | 0.069                 | 0.085                 | 0.186                 |                                                                                                                                                  |
| 270           | 2.645                                                                                  | 2.637         | 2.291                                 | 0.071                           | 0.088                         | 0.186                 |                       |                       |                                                                                                                                                  |
| 280           | 2.650                                                                                  | 2.642         | 2.291                                 | 0.074                           | 0.090                         | 0.187                 |                       |                       |                                                                                                                                                  |
| 290           | 2.649                                                                                  | 2.648         | 2.291                                 | 0.076                           | 0.093                         | 0.188                 |                       |                       |                                                                                                                                                  |
| 300           | 2.652                                                                                  | 2.653         | 2.291                                 | 0.078                           | 0.095                         | 0.188                 |                       |                       |                                                                                                                                                  |
| 310           | 2.670                                                                                  | 2.658         | 2.291                                 | 0.080                           | 0.098                         | 0.189                 |                       |                       |                                                                                                                                                  |
| 320           | 2.668                                                                                  | 2.663         | 2.291                                 | 0.083                           | 0.100                         | 0.189                 |                       |                       |                                                                                                                                                  |
| 330           | 2.664                                                                                  | 2.668         | 2.291                                 | 0.085                           | 0.103                         | 0.190                 |                       |                       |                                                                                                                                                  |
| 340           | 2.665                                                                                  | 2.673         | 2.291                                 | 0.087                           | 0.105                         | 0.190                 |                       |                       |                                                                                                                                                  |
| 350           | 2.699                                                                                  | 2.678         | 2.291                                 | 0.089                           | 0.108                         | 0.190                 |                       |                       |                                                                                                                                                  |
| 360           | 2.686                                                                                  | 2.683         | 2.291                                 | 0.091                           | 0.110                         | 0.190                 |                       |                       |                                                                                                                                                  |
| 370           | 2.685                                                                                  | 2.687         | 2.291                                 | 0.093                           | 0.112                         | 0.191                 |                       |                       |                                                                                                                                                  |
| 380           | 2.718                                                                                  | 2.692         | 2.291                                 | 0.095                           | 0.115                         | 0.191                 |                       |                       |                                                                                                                                                  |
| 390           | 2.710                                                                                  | 2.696         | 2.291                                 | 0.097                           | 0.117                         | 0.191                 |                       |                       |                                                                                                                                                  |
| 400           | 2.707                                                                                  | 2.701         | 2.291                                 | 0.099                           | 0.119                         | 0.191                 |                       |                       |                                                                                                                                                  |
| 410           | 2.724                                                                                  | 2.705         | 2.291                                 | 0.101                           | 0.121                         | 0.191                 |                       |                       |                                                                                                                                                  |
| 420           | 2.699                                                                                  | 2.709         | 2.291                                 | 0.103                           | 0.123                         | 0.191                 |                       |                       |                                                                                                                                                  |
| 430           | 2.716                                                                                  | 2.713         | 2.291                                 | 0.105                           | 0.126                         | 0.192                 |                       |                       |                                                                                                                                                  |
| 440           | 2.733                                                                                  | 2.717         | 2.291                                 | 0.107                           | 0.128                         | 0.192                 |                       |                       |                                                                                                                                                  |
| 450           | 2.728                                                                                  | 2.721         | 2.291                                 | 0.109                           | 0.130                         | 0.192                 |                       |                       |                                                                                                                                                  |
| 460           | 2.743                                                                                  | 2.725         | 2.291                                 | 0.111                           | 0.132                         | 0.192                 |                       |                       |                                                                                                                                                  |
| 470           | 2.723                                                                                  | 2.729         | 2.291                                 | 0.113                           | 0.134                         | 0.192                 |                       |                       |                                                                                                                                                  |

|             |                       |       |       |       |       |       |       |                                        |                                       |
|-------------|-----------------------|-------|-------|-------|-------|-------|-------|----------------------------------------|---------------------------------------|
|             |                       | 480   | 2.727 | 2.733 | 2.291 | 0.115 | 0.136 | 0.192                                  |                                       |
|             |                       | 490   | 2.718 | 2.737 | 2.291 | 0.116 | 0.138 | 0.192                                  |                                       |
|             |                       | 500   | 2.765 | 2.741 | 2.291 | 0.118 | 0.140 | 0.192                                  |                                       |
|             |                       | 510   | 2.717 | 2.744 | 2.291 | 0.120 | 0.141 | 0.192                                  |                                       |
|             |                       | 520   | 2.748 | 2.748 | 2.291 | 0.122 | 0.143 | 0.192                                  |                                       |
|             |                       | 530   | 2.721 | 2.752 | 2.291 | 0.124 | 0.145 | 0.192                                  |                                       |
|             |                       | 540   | 2.766 | 2.755 | 2.291 | 0.125 | 0.147 | 0.192                                  |                                       |
|             |                       | 550   | 2.760 | 2.759 | 2.291 | 0.127 | 0.149 | 0.192                                  |                                       |
|             |                       | 560   | 2.715 | 2.762 | 2.291 | 0.129 | 0.151 | 0.192                                  |                                       |
|             |                       | 570   | 2.735 | 2.766 | 2.291 | 0.130 | 0.152 | 0.192                                  |                                       |
|             |                       | 580   | 2.763 | 2.769 | 2.291 | 0.132 | 0.154 | 0.192                                  |                                       |
|             |                       | 590   | 2.805 | 2.772 | 2.291 | 0.134 | 0.156 | 0.192                                  |                                       |
|             |                       | 600   | 2.755 | 2.776 | 2.291 | 0.135 | 0.157 | 0.192                                  |                                       |
| GFET<br>#S2 | $c^{(CEA)} = 2$<br>nM | -50   | 2.324 | 2.321 | -     | -     | -     | -                                      | $\tilde{c}^{(CEA)} \approx 2.2044$ nM |
|             |                       | -40   | 2.349 | 2.321 |       |       |       |                                        |                                       |
|             |                       | -30   | 2.319 | 2.321 |       |       |       |                                        |                                       |
|             |                       | -20   | 2.325 | 2.321 |       |       |       |                                        |                                       |
|             |                       | -10   | 2.326 | 2.321 |       |       |       |                                        |                                       |
|             | 0                     | 2.295 | 2.321 | 2.321 | 0.000 | 0.000 | 0.000 |                                        |                                       |
|             | 10                    | 2.351 | 2.355 | 2.321 | 0.003 | 0.005 | 0.025 |                                        |                                       |
|             | 20                    | 2.385 | 2.384 | 2.321 | 0.006 | 0.010 | 0.046 |                                        |                                       |
|             | 30                    | 2.400 | 2.410 | 2.321 | 0.009 | 0.015 | 0.064 |                                        |                                       |
|             | 40                    | 2.449 | 2.434 | 2.321 | 0.012 | 0.020 | 0.080 |                                        |                                       |
|             | 50                    | 2.428 | 2.455 | 2.321 | 0.016 | 0.025 | 0.093 |                                        |                                       |
|             | 60                    | 2.475 | 2.474 | 2.321 | 0.019 | 0.030 | 0.104 |                                        |                                       |
|             | 70                    | 2.528 | 2.491 | 2.321 | 0.022 | 0.035 | 0.113 |                                        |                                       |
|             | 80                    | 2.507 | 2.506 | 2.321 | 0.024 | 0.039 | 0.121 |                                        |                                       |
|             | 90                    | 2.512 | 2.521 | 2.321 | 0.027 | 0.044 | 0.128 |                                        |                                       |
|             | 100                   | 2.536 | 2.534 | 2.321 | 0.030 | 0.048 | 0.134 |                                        |                                       |
|             | 110                   | 2.546 | 2.546 | 2.321 | 0.033 | 0.053 | 0.139 |                                        |                                       |
|             | 120                   | 2.567 | 2.557 | 2.321 | 0.036 | 0.057 | 0.143 |                                        |                                       |
|             | 130                   | 2.571 | 2.568 | 2.321 | 0.039 | 0.061 | 0.147 |                                        |                                       |
|             | 140                   | 2.597 | 2.578 | 2.321 | 0.041 | 0.065 | 0.150 |                                        |                                       |
|             | 150                   | 2.605 | 2.587 | 2.321 | 0.044 | 0.070 | 0.152 |                                        |                                       |
|             | 160                   | 2.587 | 2.596 | 2.321 | 0.047 | 0.074 | 0.155 |                                        |                                       |
|             | 170                   | 2.613 | 2.605 | 2.321 | 0.050 | 0.078 | 0.156 |                                        |                                       |
|             | 180                   | 2.620 | 2.613 | 2.321 | 0.052 | 0.082 | 0.158 |                                        |                                       |
|             | 190                   | 2.646 | 2.621 | 2.321 | 0.055 | 0.085 | 0.159 |                                        |                                       |
|             | 200                   | 2.608 | 2.628 | 2.321 | 0.057 | 0.089 | 0.161 |                                        |                                       |
|             | 210                   | 2.644 | 2.636 | 2.321 | 0.060 | 0.093 | 0.162 |                                        |                                       |
|             | 220                   | 2.642 | 2.643 | 2.321 | 0.062 | 0.097 | 0.162 |                                        |                                       |
|             | 230                   | 2.668 | 2.649 | 2.321 | 0.065 | 0.100 | 0.163 |                                        |                                       |
|             | 240                   | 2.622 | 2.656 | 2.321 | 0.067 | 0.104 | 0.164 |                                        |                                       |
| 250         | 2.660                 | 2.662 | 2.321 | 0.070 | 0.107 | 0.164 |       |                                        |                                       |
| 260         | 2.665                 | 2.669 | 2.321 | 0.072 | 0.111 | 0.165 |       |                                        |                                       |
| 270         | 2.680                 | 2.675 | 2.321 | 0.075 | 0.114 | 0.165 |       |                                        |                                       |
| 280         | 2.701                 | 2.681 | 2.321 | 0.077 | 0.117 | 0.165 |       |                                        |                                       |
| 290         | 2.676                 | 2.687 | 2.321 | 0.079 | 0.121 | 0.166 |       |                                        |                                       |
| 300         | 2.685                 | 2.693 | 2.321 | 0.082 | 0.124 | 0.166 |       |                                        |                                       |
|             |                       |       |       |       |       |       |       | $\tilde{c}^{(AFP)} \approx 7.6324$ nM  |                                       |
|             |                       |       |       |       |       |       |       | $\tilde{c}^{(PTH)} \approx 13.5743$ nM |                                       |

|             |                        |       |       |       |       |       |       |       |                                           |
|-------------|------------------------|-------|-------|-------|-------|-------|-------|-------|-------------------------------------------|
|             |                        | 310   | 2.725 | 2.698 | 2.321 | 0.084 | 0.127 | 0.166 |                                           |
|             |                        | 320   | 2.712 | 2.704 | 2.321 | 0.086 | 0.130 | 0.166 |                                           |
|             |                        | 330   | 2.707 | 2.709 | 2.321 | 0.088 | 0.133 | 0.166 |                                           |
|             |                        | 340   | 2.711 | 2.715 | 2.321 | 0.091 | 0.136 | 0.166 |                                           |
|             |                        | 350   | 2.699 | 2.720 | 2.321 | 0.093 | 0.139 | 0.166 |                                           |
|             |                        | 360   | 2.731 | 2.725 | 2.321 | 0.095 | 0.142 | 0.167 |                                           |
|             |                        | 370   | 2.738 | 2.730 | 2.321 | 0.097 | 0.145 | 0.167 |                                           |
|             |                        | 380   | 2.722 | 2.735 | 2.321 | 0.099 | 0.148 | 0.167 |                                           |
|             |                        | 390   | 2.717 | 2.740 | 2.321 | 0.101 | 0.151 | 0.167 |                                           |
|             |                        | 400   | 2.719 | 2.745 | 2.321 | 0.103 | 0.153 | 0.167 |                                           |
|             |                        | 410   | 2.716 | 2.750 | 2.321 | 0.105 | 0.156 | 0.167 |                                           |
|             |                        | 420   | 2.749 | 2.754 | 2.321 | 0.107 | 0.159 | 0.167 |                                           |
|             |                        | 430   | 2.753 | 2.759 | 2.321 | 0.110 | 0.161 | 0.167 |                                           |
|             |                        | 440   | 2.764 | 2.764 | 2.321 | 0.111 | 0.164 | 0.167 |                                           |
|             |                        | 450   | 2.741 | 2.768 | 2.321 | 0.113 | 0.167 | 0.167 |                                           |
|             |                        | 460   | 2.801 | 2.773 | 2.321 | 0.115 | 0.169 | 0.167 |                                           |
|             |                        | 470   | 2.819 | 2.777 | 2.321 | 0.117 | 0.171 | 0.167 |                                           |
|             |                        | 480   | 2.783 | 2.781 | 2.321 | 0.119 | 0.174 | 0.167 |                                           |
|             |                        | 490   | 2.804 | 2.786 | 2.321 | 0.121 | 0.176 | 0.167 |                                           |
|             |                        | 500   | 2.778 | 2.790 | 2.321 | 0.123 | 0.179 | 0.167 |                                           |
|             |                        | 510   | 2.797 | 2.794 | 2.321 | 0.125 | 0.181 | 0.167 |                                           |
|             |                        | 520   | 2.803 | 2.798 | 2.321 | 0.127 | 0.183 | 0.167 |                                           |
|             |                        | 530   | 2.772 | 2.802 | 2.321 | 0.128 | 0.185 | 0.167 |                                           |
|             |                        | 540   | 2.824 | 2.806 | 2.321 | 0.130 | 0.188 | 0.167 |                                           |
|             |                        | 550   | 2.794 | 2.810 | 2.321 | 0.132 | 0.190 | 0.167 |                                           |
|             |                        | 560   | 2.836 | 2.814 | 2.321 | 0.134 | 0.192 | 0.167 |                                           |
|             |                        | 570   | 2.815 | 2.817 | 2.321 | 0.135 | 0.194 | 0.167 |                                           |
|             |                        | 580   | 2.796 | 2.821 | 2.321 | 0.137 | 0.196 | 0.167 |                                           |
|             |                        | 590   | 2.833 | 2.825 | 2.321 | 0.139 | 0.198 | 0.167 |                                           |
|             |                        | 600   | 2.835 | 2.829 | 2.321 | 0.140 | 0.200 | 0.167 |                                           |
| GFET<br>#S3 | $c^{(CEA)} = 2$<br>nM  | -50   | 2.331 | 2.326 | -     | -     | -     | -     | $\tilde{c}^{(CEA)} \approx$<br>2.2122 nM  |
|             |                        | -40   | 2.335 | 2.326 |       |       |       |       |                                           |
|             |                        | -30   | 2.333 | 2.326 |       |       |       |       |                                           |
|             |                        | -20   | 2.356 | 2.326 |       |       |       |       |                                           |
|             |                        | -10   | 2.320 | 2.326 |       |       |       |       |                                           |
|             | 0                      | 2.335 | 2.326 | 2.326 | 0.000 | 0.000 | 0.000 |       |                                           |
|             | $c^{(AFP)} = 5$<br>nM  | 10    | 2.410 | 2.409 | 2.326 | 0.003 | 0.005 | 0.075 | $\tilde{c}^{(AFP)} \approx$<br>7.0987 nM  |
|             |                        | 20    | 2.460 | 2.462 | 2.326 | 0.006 | 0.010 | 0.120 |                                           |
|             |                        | 30    | 2.496 | 2.498 | 2.326 | 0.009 | 0.015 | 0.148 |                                           |
|             | $c^{(PTH)} = 20$<br>nM | 40    | 2.555 | 2.522 | 2.326 | 0.012 | 0.020 | 0.164 | $\tilde{c}^{(PTH)} \approx$<br>47.3324 nM |
|             |                        | 50    | 2.524 | 2.539 | 2.326 | 0.015 | 0.024 | 0.174 |                                           |
|             |                        | 60    | 2.555 | 2.552 | 2.326 | 0.017 | 0.029 | 0.180 |                                           |
|             |                        | 70    | 2.584 | 2.563 | 2.326 | 0.020 | 0.033 | 0.184 |                                           |
|             |                        | 80    | 2.576 | 2.573 | 2.326 | 0.023 | 0.038 | 0.186 |                                           |
| 90          |                        | 2.574 | 2.581 | 2.326 | 0.026 | 0.042 | 0.187 |       |                                           |
| 100         |                        | 2.546 | 2.589 | 2.326 | 0.028 | 0.047 | 0.188 |       |                                           |

|     |       |       |       |       |       |       |
|-----|-------|-------|-------|-------|-------|-------|
| 110 | 2.584 | 2.596 | 2.326 | 0.031 | 0.051 | 0.188 |
| 120 | 2.595 | 2.604 | 2.326 | 0.034 | 0.055 | 0.189 |
| 130 | 2.599 | 2.611 | 2.326 | 0.036 | 0.059 | 0.189 |
| 140 | 2.594 | 2.617 | 2.326 | 0.039 | 0.063 | 0.189 |
| 150 | 2.612 | 2.624 | 2.326 | 0.041 | 0.067 | 0.189 |
| 160 | 2.649 | 2.630 | 2.326 | 0.044 | 0.071 | 0.189 |
| 170 | 2.676 | 2.637 | 2.326 | 0.046 | 0.075 | 0.189 |
| 180 | 2.637 | 2.643 | 2.326 | 0.049 | 0.079 | 0.189 |
| 190 | 2.657 | 2.649 | 2.326 | 0.051 | 0.083 | 0.189 |
| 200 | 2.633 | 2.655 | 2.326 | 0.054 | 0.087 | 0.189 |
| 210 | 2.647 | 2.662 | 2.326 | 0.056 | 0.090 | 0.189 |
| 220 | 2.642 | 2.667 | 2.326 | 0.058 | 0.094 | 0.189 |
| 230 | 2.689 | 2.673 | 2.326 | 0.061 | 0.097 | 0.189 |
| 240 | 2.690 | 2.679 | 2.326 | 0.063 | 0.101 | 0.189 |
| 250 | 2.673 | 2.685 | 2.326 | 0.065 | 0.104 | 0.189 |
| 260 | 2.672 | 2.691 | 2.326 | 0.068 | 0.108 | 0.189 |
| 270 | 2.692 | 2.696 | 2.326 | 0.070 | 0.111 | 0.189 |
| 280 | 2.703 | 2.702 | 2.326 | 0.072 | 0.114 | 0.189 |
| 290 | 2.669 | 2.707 | 2.326 | 0.074 | 0.117 | 0.189 |
| 300 | 2.702 | 2.712 | 2.326 | 0.076 | 0.121 | 0.189 |
| 310 | 2.717 | 2.718 | 2.326 | 0.079 | 0.124 | 0.189 |
| 320 | 2.741 | 2.723 | 2.326 | 0.081 | 0.127 | 0.189 |
| 330 | 2.724 | 2.728 | 2.326 | 0.083 | 0.130 | 0.189 |
| 340 | 2.733 | 2.733 | 2.326 | 0.085 | 0.133 | 0.189 |
| 350 | 2.728 | 2.738 | 2.326 | 0.087 | 0.136 | 0.189 |
| 360 | 2.756 | 2.743 | 2.326 | 0.089 | 0.138 | 0.189 |
| 370 | 2.744 | 2.748 | 2.326 | 0.091 | 0.141 | 0.189 |
| 380 | 2.747 | 2.752 | 2.326 | 0.093 | 0.144 | 0.189 |
| 390 | 2.761 | 2.757 | 2.326 | 0.095 | 0.147 | 0.189 |
| 400 | 2.776 | 2.762 | 2.326 | 0.097 | 0.150 | 0.189 |
| 410 | 2.752 | 2.766 | 2.326 | 0.099 | 0.152 | 0.189 |
| 420 | 2.765 | 2.771 | 2.326 | 0.101 | 0.155 | 0.189 |
| 430 | 2.754 | 2.775 | 2.326 | 0.103 | 0.157 | 0.189 |
| 440 | 2.771 | 2.780 | 2.326 | 0.104 | 0.160 | 0.189 |
| 450 | 2.809 | 2.784 | 2.326 | 0.106 | 0.162 | 0.189 |
| 460 | 2.745 | 2.788 | 2.326 | 0.108 | 0.165 | 0.189 |
| 470 | 2.781 | 2.792 | 2.326 | 0.110 | 0.167 | 0.189 |
| 480 | 2.788 | 2.797 | 2.326 | 0.112 | 0.170 | 0.189 |
| 490 | 2.819 | 2.801 | 2.326 | 0.113 | 0.172 | 0.189 |
| 500 | 2.776 | 2.805 | 2.326 | 0.115 | 0.174 | 0.189 |
| 510 | 2.828 | 2.809 | 2.326 | 0.117 | 0.177 | 0.189 |
| 520 | 2.802 | 2.813 | 2.326 | 0.119 | 0.179 | 0.189 |
| 530 | 2.850 | 2.817 | 2.326 | 0.120 | 0.181 | 0.189 |
| 540 | 2.814 | 2.820 | 2.326 | 0.122 | 0.183 | 0.189 |
| 550 | 2.814 | 2.824 | 2.326 | 0.124 | 0.185 | 0.189 |
| 560 | 2.834 | 2.828 | 2.326 | 0.125 | 0.187 | 0.189 |

|             |                        |       |       |       |       |       |       |                                      |                                     |
|-------------|------------------------|-------|-------|-------|-------|-------|-------|--------------------------------------|-------------------------------------|
|             |                        | 570   | 2.822 | 2.832 | 2.326 | 0.127 | 0.190 | 0.189                                |                                     |
|             |                        | 580   | 2.860 | 2.835 | 2.326 | 0.128 | 0.192 | 0.189                                |                                     |
|             |                        | 590   | 2.828 | 2.839 | 2.326 | 0.130 | 0.194 | 0.189                                |                                     |
|             |                        | 600   | 2.835 | 2.842 | 2.326 | 0.132 | 0.196 | 0.189                                |                                     |
| GFET<br>#S4 | $c^{(CEA)} = 2$<br>nM  | -50   | 2.254 | 2.268 | -     | -     | -     | -                                    | $\hat{c}^{(CEA)} \approx 2.6877$ nM |
|             |                        | -40   | 2.278 | 2.268 |       |       |       |                                      |                                     |
|             |                        | -30   | 2.290 | 2.268 |       |       |       |                                      |                                     |
|             |                        | -20   | 2.260 | 2.268 |       |       |       |                                      |                                     |
|             |                        | -10   | 2.315 | 2.268 |       |       |       |                                      |                                     |
|             |                        | 0     | 2.245 | 2.268 | 2.268 | 0.000 | 0.000 | 0.000                                |                                     |
|             |                        | 10    | 2.363 | 2.386 | 2.268 | 0.004 | 0.004 | 0.110                                |                                     |
|             |                        | 20    | 2.475 | 2.436 | 2.268 | 0.008 | 0.008 | 0.152                                |                                     |
|             |                        | 30    | 2.501 | 2.460 | 2.268 | 0.013 | 0.012 | 0.168                                |                                     |
|             |                        | 40    | 2.486 | 2.474 | 2.268 | 0.017 | 0.016 | 0.174                                |                                     |
|             |                        | 50    | 2.478 | 2.484 | 2.268 | 0.021 | 0.019 | 0.176                                |                                     |
|             |                        | 60    | 2.482 | 2.492 | 2.268 | 0.025 | 0.023 | 0.177                                |                                     |
|             |                        | 70    | 2.501 | 2.500 | 2.268 | 0.029 | 0.027 | 0.177                                |                                     |
|             |                        | 80    | 2.508 | 2.508 | 2.268 | 0.032 | 0.030 | 0.177                                |                                     |
|             |                        | 90    | 2.523 | 2.515 | 2.268 | 0.036 | 0.034 | 0.177                                |                                     |
|             |                        | 100   | 2.519 | 2.522 | 2.268 | 0.040 | 0.037 | 0.177                                |                                     |
|             |                        | 110   | 2.514 | 2.530 | 2.268 | 0.044 | 0.041 | 0.177                                |                                     |
|             |                        | 120   | 2.514 | 2.537 | 2.268 | 0.047 | 0.044 | 0.177                                |                                     |
|             |                        | 130   | 2.520 | 2.544 | 2.268 | 0.051 | 0.047 | 0.177                                |                                     |
|             |                        | 140   | 2.524 | 2.550 | 2.268 | 0.055 | 0.051 | 0.177                                |                                     |
|             |                        | 150   | 2.547 | 2.557 | 2.268 | 0.058 | 0.054 | 0.177                                |                                     |
|             |                        | 160   | 2.586 | 2.564 | 2.268 | 0.062 | 0.057 | 0.177                                |                                     |
|             |                        | 170   | 2.555 | 2.570 | 2.268 | 0.065 | 0.060 | 0.177                                |                                     |
|             |                        | 180   | 2.588 | 2.577 | 2.268 | 0.069 | 0.063 | 0.177                                |                                     |
|             |                        | 190   | 2.565 | 2.583 | 2.268 | 0.072 | 0.066 | 0.177                                |                                     |
|             |                        | 200   | 2.600 | 2.590 | 2.268 | 0.075 | 0.069 | 0.177                                |                                     |
|             |                        | 210   | 2.605 | 2.596 | 2.268 | 0.079 | 0.072 | 0.177                                |                                     |
|             |                        | 220   | 2.622 | 2.602 | 2.268 | 0.082 | 0.075 | 0.177                                |                                     |
|             |                        | 230   | 2.587 | 2.608 | 2.268 | 0.085 | 0.078 | 0.177                                |                                     |
|             |                        | 240   | 2.600 | 2.614 | 2.268 | 0.088 | 0.081 | 0.177                                |                                     |
|             |                        | 250   | 2.597 | 2.620 | 2.268 | 0.091 | 0.083 | 0.177                                |                                     |
|             |                        | 260   | 2.608 | 2.626 | 2.268 | 0.094 | 0.086 | 0.177                                |                                     |
|             |                        | 270   | 2.638 | 2.632 | 2.268 | 0.097 | 0.089 | 0.177                                |                                     |
|             |                        | 280   | 2.645 | 2.637 | 2.268 | 0.100 | 0.092 | 0.177                                |                                     |
|             |                        | 290   | 2.639 | 2.643 | 2.268 | 0.103 | 0.094 | 0.177                                |                                     |
|             |                        | 300   | 2.670 | 2.648 | 2.268 | 0.106 | 0.097 | 0.177                                |                                     |
| 310         | 2.659                  | 2.654 | 2.268 | 0.109 | 0.099 | 0.177 |       |                                      |                                     |
| 320         | 2.655                  | 2.659 | 2.268 | 0.112 | 0.102 | 0.177 |       |                                      |                                     |
| 330         | 2.680                  | 2.664 | 2.268 | 0.115 | 0.104 | 0.177 |       |                                      |                                     |
| 340         | 2.636                  | 2.670 | 2.268 | 0.118 | 0.107 | 0.177 |       |                                      |                                     |
| 350         | 2.657                  | 2.675 | 2.268 | 0.121 | 0.109 | 0.177 |       |                                      |                                     |
| 360         | 2.676                  | 2.680 | 2.268 | 0.123 | 0.112 | 0.177 |       |                                      |                                     |
|             | $c^{(AFP)} = 5$<br>nM  |       |       |       |       |       |       | $\hat{c}^{(AFP)} \approx 6.0683$ nM  |                                     |
|             | $c^{(PTH)} = 50$<br>nM |       |       |       |       |       |       | $\hat{c}^{(PTH)} \approx 92.5543$ nM |                                     |

|             |                        |       |       |       |       |       |       |                                           |                                          |
|-------------|------------------------|-------|-------|-------|-------|-------|-------|-------------------------------------------|------------------------------------------|
|             |                        | 370   | 2.704 | 2.685 | 2.268 | 0.126 | 0.114 | 0.177                                     |                                          |
|             |                        | 380   | 2.665 | 2.690 | 2.268 | 0.129 | 0.116 | 0.177                                     |                                          |
|             |                        | 390   | 2.711 | 2.695 | 2.268 | 0.131 | 0.118 | 0.177                                     |                                          |
|             |                        | 400   | 2.649 | 2.700 | 2.268 | 0.134 | 0.121 | 0.177                                     |                                          |
|             |                        | 410   | 2.706 | 2.704 | 2.268 | 0.136 | 0.123 | 0.177                                     |                                          |
|             |                        | 420   | 2.713 | 2.709 | 2.268 | 0.139 | 0.125 | 0.177                                     |                                          |
|             |                        | 430   | 2.717 | 2.714 | 2.268 | 0.141 | 0.127 | 0.177                                     |                                          |
|             |                        | 440   | 2.716 | 2.718 | 2.268 | 0.144 | 0.129 | 0.177                                     |                                          |
|             |                        | 450   | 2.720 | 2.723 | 2.268 | 0.146 | 0.131 | 0.177                                     |                                          |
|             |                        | 460   | 2.736 | 2.727 | 2.268 | 0.149 | 0.133 | 0.177                                     |                                          |
|             |                        | 470   | 2.697 | 2.732 | 2.268 | 0.151 | 0.135 | 0.177                                     |                                          |
|             |                        | 480   | 2.763 | 2.736 | 2.268 | 0.153 | 0.137 | 0.177                                     |                                          |
|             |                        | 490   | 2.757 | 2.740 | 2.268 | 0.156 | 0.139 | 0.177                                     |                                          |
|             |                        | 500   | 2.763 | 2.744 | 2.268 | 0.158 | 0.141 | 0.177                                     |                                          |
|             |                        | 510   | 2.741 | 2.748 | 2.268 | 0.160 | 0.143 | 0.177                                     |                                          |
|             |                        | 520   | 2.777 | 2.753 | 2.268 | 0.162 | 0.145 | 0.177                                     |                                          |
|             |                        | 530   | 2.783 | 2.757 | 2.268 | 0.165 | 0.147 | 0.177                                     |                                          |
|             |                        | 540   | 2.758 | 2.761 | 2.268 | 0.167 | 0.149 | 0.177                                     |                                          |
|             |                        | 550   | 2.757 | 2.764 | 2.268 | 0.169 | 0.150 | 0.177                                     |                                          |
|             |                        | 560   | 2.754 | 2.768 | 2.268 | 0.171 | 0.152 | 0.177                                     |                                          |
|             |                        | 570   | 2.785 | 2.772 | 2.268 | 0.173 | 0.154 | 0.177                                     |                                          |
|             |                        | 580   | 2.756 | 2.776 | 2.268 | 0.175 | 0.156 | 0.177                                     |                                          |
|             |                        | 590   | 2.766 | 2.780 | 2.268 | 0.177 | 0.157 | 0.177                                     |                                          |
|             |                        | 600   | 2.746 | 2.783 | 2.268 | 0.179 | 0.159 | 0.177                                     |                                          |
| GFET<br>#S5 | $c^{(CEA)} = 2$<br>nM  | -50   | 2.337 | 2.326 | -     | -     | -     | -                                         | $\tilde{c}^{(CEA)} \approx$<br>2.3419 nM |
|             |                        | -40   | 2.335 | 2.326 |       |       |       |                                           |                                          |
|             |                        | -30   | 2.327 | 2.326 |       |       |       |                                           |                                          |
|             |                        | -20   | 2.332 | 2.326 |       |       |       |                                           |                                          |
|             |                        | -10   | 2.349 | 2.326 |       |       |       |                                           |                                          |
|             | 0                      | 2.358 | 2.326 | 2.326 | 0.000 | 0.000 | 0.000 |                                           |                                          |
|             | 10                     | 2.355 | 2.351 | 2.326 | 0.003 | 0.010 | 0.012 |                                           |                                          |
|             | 20                     | 2.373 | 2.375 | 2.326 | 0.007 | 0.020 | 0.023 |                                           |                                          |
|             | 30                     | 2.399 | 2.398 | 2.326 | 0.010 | 0.029 | 0.033 |                                           |                                          |
|             | 40                     | 2.428 | 2.420 | 2.326 | 0.013 | 0.039 | 0.042 |                                           |                                          |
|             | 50                     | 2.452 | 2.440 | 2.326 | 0.016 | 0.048 | 0.050 |                                           |                                          |
|             | 60                     | 2.458 | 2.459 | 2.326 | 0.019 | 0.057 | 0.057 |                                           |                                          |
|             | 70                     | 2.487 | 2.478 | 2.326 | 0.022 | 0.065 | 0.064 |                                           |                                          |
|             | 80                     | 2.506 | 2.496 | 2.326 | 0.025 | 0.074 | 0.070 |                                           |                                          |
|             | 90                     | 2.494 | 2.513 | 2.326 | 0.028 | 0.082 | 0.076 |                                           |                                          |
|             | 100                    | 2.529 | 2.529 | 2.326 | 0.031 | 0.090 | 0.081 |                                           |                                          |
|             | 110                    | 2.549 | 2.545 | 2.326 | 0.034 | 0.098 | 0.086 |                                           |                                          |
|             | 120                    | 2.529 | 2.560 | 2.326 | 0.037 | 0.106 | 0.090 |                                           |                                          |
|             | 130                    | 2.583 | 2.574 | 2.326 | 0.040 | 0.114 | 0.094 |                                           |                                          |
|             | 140                    | 2.594 | 2.588 | 2.326 | 0.043 | 0.121 | 0.097 |                                           |                                          |
| 150         | 2.608                  | 2.601 | 2.326 | 0.046 | 0.129 | 0.100 |       |                                           |                                          |
| 160         | 2.633                  | 2.614 | 2.326 | 0.049 | 0.136 | 0.103 |       |                                           |                                          |
|             | $c^{(AFP)} = 20$<br>nM |       |       |       |       |       |       | $\tilde{c}^{(AFP)} \approx$<br>14.1784 nM |                                          |
|             | $c^{(PTH)} = 2$<br>nM  |       |       |       |       |       |       | $\tilde{c}^{(PTH)} \approx$<br>6.8743 nM  |                                          |



|             |                       |     |       |       |       |       |       |       |                                          |
|-------------|-----------------------|-----|-------|-------|-------|-------|-------|-------|------------------------------------------|
|             |                       | 170 | 2.655 | 2.626 | 2.326 | 0.051 | 0.143 | 0.106 |                                          |
|             |                       | 180 | 2.631 | 2.638 | 2.326 | 0.054 | 0.149 | 0.108 |                                          |
|             |                       | 190 | 2.646 | 2.650 | 2.326 | 0.057 | 0.156 | 0.111 |                                          |
|             |                       | 200 | 2.658 | 2.661 | 2.326 | 0.060 | 0.163 | 0.113 |                                          |
|             |                       | 210 | 2.680 | 2.672 | 2.326 | 0.062 | 0.169 | 0.114 |                                          |
|             |                       | 220 | 2.660 | 2.682 | 2.326 | 0.065 | 0.175 | 0.116 |                                          |
|             |                       | 230 | 2.698 | 2.692 | 2.326 | 0.067 | 0.181 | 0.118 |                                          |
|             |                       | 240 | 2.720 | 2.702 | 2.326 | 0.070 | 0.187 | 0.119 |                                          |
|             |                       | 250 | 2.699 | 2.712 | 2.326 | 0.072 | 0.193 | 0.120 |                                          |
|             |                       | 260 | 2.708 | 2.721 | 2.326 | 0.075 | 0.198 | 0.121 |                                          |
|             |                       | 270 | 2.729 | 2.730 | 2.326 | 0.077 | 0.204 | 0.122 |                                          |
|             |                       | 280 | 2.740 | 2.739 | 2.326 | 0.080 | 0.209 | 0.123 |                                          |
|             |                       | 290 | 2.782 | 2.747 | 2.326 | 0.082 | 0.215 | 0.124 |                                          |
|             |                       | 300 | 2.739 | 2.755 | 2.326 | 0.085 | 0.220 | 0.125 |                                          |
|             |                       | 310 | 2.757 | 2.764 | 2.326 | 0.087 | 0.225 | 0.126 |                                          |
|             |                       | 320 | 2.763 | 2.771 | 2.326 | 0.089 | 0.230 | 0.126 |                                          |
|             |                       | 330 | 2.772 | 2.779 | 2.326 | 0.092 | 0.235 | 0.127 |                                          |
|             |                       | 340 | 2.781 | 2.787 | 2.326 | 0.094 | 0.239 | 0.127 |                                          |
|             |                       | 350 | 2.772 | 2.794 | 2.326 | 0.096 | 0.244 | 0.128 |                                          |
|             |                       | 360 | 2.789 | 2.801 | 2.326 | 0.098 | 0.248 | 0.128 |                                          |
|             |                       | 370 | 2.811 | 2.808 | 2.326 | 0.100 | 0.253 | 0.129 |                                          |
|             |                       | 380 | 2.806 | 2.815 | 2.326 | 0.103 | 0.257 | 0.129 |                                          |
|             |                       | 390 | 2.808 | 2.822 | 2.326 | 0.105 | 0.261 | 0.129 |                                          |
|             |                       | 400 | 2.845 | 2.828 | 2.326 | 0.107 | 0.265 | 0.130 |                                          |
|             |                       | 410 | 2.841 | 2.835 | 2.326 | 0.109 | 0.269 | 0.130 |                                          |
|             |                       | 420 | 2.844 | 2.841 | 2.326 | 0.111 | 0.273 | 0.130 |                                          |
|             |                       | 430 | 2.851 | 2.847 | 2.326 | 0.113 | 0.277 | 0.131 |                                          |
|             |                       | 440 | 2.861 | 2.853 | 2.326 | 0.115 | 0.281 | 0.131 |                                          |
|             |                       | 450 | 2.861 | 2.859 | 2.326 | 0.117 | 0.285 | 0.131 |                                          |
|             |                       | 460 | 2.870 | 2.865 | 2.326 | 0.119 | 0.288 | 0.131 |                                          |
|             |                       | 470 | 2.874 | 2.870 | 2.326 | 0.121 | 0.292 | 0.131 |                                          |
|             |                       | 480 | 2.895 | 2.876 | 2.326 | 0.123 | 0.295 | 0.131 |                                          |
|             |                       | 490 | 2.874 | 2.881 | 2.326 | 0.125 | 0.298 | 0.132 |                                          |
|             |                       | 500 | 2.874 | 2.886 | 2.326 | 0.127 | 0.302 | 0.132 |                                          |
|             |                       | 510 | 2.899 | 2.891 | 2.326 | 0.129 | 0.305 | 0.132 |                                          |
|             |                       | 520 | 2.916 | 2.897 | 2.326 | 0.131 | 0.308 | 0.132 |                                          |
|             |                       | 530 | 2.923 | 2.902 | 2.326 | 0.132 | 0.311 | 0.132 |                                          |
|             |                       | 540 | 2.897 | 2.906 | 2.326 | 0.134 | 0.314 | 0.132 |                                          |
|             |                       | 550 | 2.910 | 2.911 | 2.326 | 0.136 | 0.317 | 0.132 |                                          |
|             |                       | 560 | 2.935 | 2.916 | 2.326 | 0.138 | 0.320 | 0.132 |                                          |
|             |                       | 570 | 2.941 | 2.920 | 2.326 | 0.139 | 0.323 | 0.132 |                                          |
|             |                       | 580 | 2.917 | 2.925 | 2.326 | 0.141 | 0.325 | 0.132 |                                          |
|             |                       | 590 | 2.941 | 2.929 | 2.326 | 0.143 | 0.328 | 0.132 |                                          |
|             |                       | 600 | 2.946 | 2.934 | 2.326 | 0.145 | 0.331 | 0.132 |                                          |
| GFET<br>#S6 | $c^{(CEA)} = 2$<br>nM | -50 | 2.283 | 2.297 |       |       |       |       | $\tilde{c}^{(CEA)} \approx$<br>2.8995 nM |
|             |                       | -40 | 2.292 | 2.297 | -     | -     | -     | -     |                                          |

|                        |       |       |       |       |       |       |       |                                         |
|------------------------|-------|-------|-------|-------|-------|-------|-------|-----------------------------------------|
| $c^{(AFP)} = 20$<br>nM | -30   | 2.304 | 2.297 |       |       |       |       | $\bar{c}^{(AFP)} \approx$<br>14.5235 nM |
|                        | -20   | 2.325 | 2.297 |       |       |       |       |                                         |
|                        | -10   | 2.295 | 2.297 |       |       |       |       |                                         |
| $c^{(PTH)} = 5$<br>nM  | 0     | 2.301 | 2.297 | 2.297 | 0.000 | 0.000 | 0.000 | $\bar{c}^{(PTH)} \approx$<br>11.0934 nM |
|                        | 10    | 2.316 | 2.330 | 2.297 | 0.004 | 0.010 | 0.020 |                                         |
|                        | 20    | 2.354 | 2.361 | 2.297 | 0.009 | 0.019 | 0.037 |                                         |
|                        | 30    | 2.376 | 2.389 | 2.297 | 0.013 | 0.028 | 0.051 |                                         |
|                        | 40    | 2.431 | 2.416 | 2.297 | 0.017 | 0.037 | 0.064 |                                         |
|                        | 50    | 2.444 | 2.440 | 2.297 | 0.022 | 0.046 | 0.076 |                                         |
|                        | 60    | 2.450 | 2.462 | 2.297 | 0.026 | 0.054 | 0.085 |                                         |
|                        | 70    | 2.462 | 2.483 | 2.297 | 0.030 | 0.063 | 0.094 |                                         |
|                        | 80    | 2.521 | 2.503 | 2.297 | 0.034 | 0.071 | 0.101 |                                         |
|                        | 90    | 2.517 | 2.521 | 2.297 | 0.038 | 0.079 | 0.108 |                                         |
|                        | 100   | 2.540 | 2.539 | 2.297 | 0.042 | 0.086 | 0.114 |                                         |
|                        | 110   | 2.539 | 2.555 | 2.297 | 0.046 | 0.094 | 0.119 |                                         |
|                        | 120   | 2.560 | 2.571 | 2.297 | 0.050 | 0.101 | 0.123 |                                         |
|                        | 130   | 2.589 | 2.586 | 2.297 | 0.053 | 0.109 | 0.127 |                                         |
|                        | 140   | 2.585 | 2.600 | 2.297 | 0.057 | 0.116 | 0.130 |                                         |
|                        | 150   | 2.621 | 2.613 | 2.297 | 0.061 | 0.123 | 0.133 |                                         |
|                        | 160   | 2.629 | 2.626 | 2.297 | 0.065 | 0.130 | 0.135 |                                         |
|                        | 170   | 2.639 | 2.639 | 2.297 | 0.068 | 0.136 | 0.137 |                                         |
|                        | 180   | 2.629 | 2.650 | 2.297 | 0.072 | 0.143 | 0.139 |                                         |
|                        | 190   | 2.675 | 2.662 | 2.297 | 0.075 | 0.149 | 0.141 |                                         |
|                        | 200   | 2.654 | 2.673 | 2.297 | 0.079 | 0.155 | 0.142 |                                         |
|                        | 210   | 2.684 | 2.684 | 2.297 | 0.082 | 0.161 | 0.144 |                                         |
|                        | 220   | 2.697 | 2.694 | 2.297 | 0.085 | 0.167 | 0.145 |                                         |
|                        | 230   | 2.718 | 2.704 | 2.297 | 0.089 | 0.173 | 0.146 |                                         |
|                        | 240   | 2.716 | 2.714 | 2.297 | 0.092 | 0.178 | 0.147 |                                         |
|                        | 250   | 2.748 | 2.723 | 2.297 | 0.095 | 0.184 | 0.147 |                                         |
|                        | 260   | 2.706 | 2.732 | 2.297 | 0.098 | 0.189 | 0.148 |                                         |
|                        | 270   | 2.740 | 2.741 | 2.297 | 0.101 | 0.194 | 0.149 |                                         |
|                        | 280   | 2.760 | 2.750 | 2.297 | 0.105 | 0.200 | 0.149 |                                         |
|                        | 290   | 2.759 | 2.758 | 2.297 | 0.108 | 0.205 | 0.149 |                                         |
|                        | 300   | 2.774 | 2.767 | 2.297 | 0.111 | 0.209 | 0.150 |                                         |
|                        | 310   | 2.767 | 2.775 | 2.297 | 0.114 | 0.214 | 0.150 |                                         |
|                        | 320   | 2.768 | 2.783 | 2.297 | 0.117 | 0.219 | 0.150 |                                         |
|                        | 330   | 2.773 | 2.790 | 2.297 | 0.119 | 0.223 | 0.151 |                                         |
|                        | 340   | 2.802 | 2.798 | 2.297 | 0.122 | 0.228 | 0.151 |                                         |
|                        | 350   | 2.805 | 2.805 | 2.297 | 0.125 | 0.232 | 0.151 |                                         |
|                        | 360   | 2.807 | 2.812 | 2.297 | 0.128 | 0.237 | 0.151 |                                         |
|                        | 370   | 2.835 | 2.820 | 2.297 | 0.131 | 0.241 | 0.151 |                                         |
|                        | 380   | 2.820 | 2.826 | 2.297 | 0.133 | 0.245 | 0.151 |                                         |
|                        | 390   | 2.834 | 2.833 | 2.297 | 0.136 | 0.249 | 0.152 |                                         |
|                        | 400   | 2.863 | 2.840 | 2.297 | 0.139 | 0.253 | 0.152 |                                         |
|                        | 410   | 2.852 | 2.846 | 2.297 | 0.141 | 0.256 | 0.152 |                                         |
| 420                    | 2.844 | 2.853 | 2.297 | 0.144 | 0.260 | 0.152 |       |                                         |

|             |                                                                           |       |       |       |       |       |       |       |                                                                                                                                    |
|-------------|---------------------------------------------------------------------------|-------|-------|-------|-------|-------|-------|-------|------------------------------------------------------------------------------------------------------------------------------------|
|             |                                                                           | 430   | 2.843 | 2.859 | 2.297 | 0.146 | 0.264 | 0.152 |                                                                                                                                    |
|             |                                                                           | 440   | 2.873 | 2.865 | 2.297 | 0.149 | 0.267 | 0.152 |                                                                                                                                    |
|             |                                                                           | 450   | 2.859 | 2.871 | 2.297 | 0.151 | 0.271 | 0.152 |                                                                                                                                    |
|             |                                                                           | 460   | 2.878 | 2.877 | 2.297 | 0.154 | 0.274 | 0.152 |                                                                                                                                    |
|             |                                                                           | 470   | 2.871 | 2.882 | 2.297 | 0.156 | 0.277 | 0.152 |                                                                                                                                    |
|             |                                                                           | 480   | 2.903 | 2.888 | 2.297 | 0.159 | 0.281 | 0.152 |                                                                                                                                    |
|             |                                                                           | 490   | 2.914 | 2.894 | 2.297 | 0.161 | 0.284 | 0.152 |                                                                                                                                    |
|             |                                                                           | 500   | 2.894 | 2.899 | 2.297 | 0.163 | 0.287 | 0.152 |                                                                                                                                    |
|             |                                                                           | 510   | 2.913 | 2.904 | 2.297 | 0.166 | 0.290 | 0.152 |                                                                                                                                    |
|             |                                                                           | 520   | 2.908 | 2.909 | 2.297 | 0.168 | 0.293 | 0.152 |                                                                                                                                    |
|             |                                                                           | 530   | 2.901 | 2.915 | 2.297 | 0.170 | 0.296 | 0.152 |                                                                                                                                    |
|             |                                                                           | 540   | 2.945 | 2.920 | 2.297 | 0.172 | 0.298 | 0.152 |                                                                                                                                    |
|             |                                                                           | 550   | 2.939 | 2.924 | 2.297 | 0.174 | 0.301 | 0.152 |                                                                                                                                    |
|             |                                                                           | 560   | 2.911 | 2.929 | 2.297 | 0.176 | 0.304 | 0.152 |                                                                                                                                    |
|             |                                                                           | 570   | 2.945 | 2.934 | 2.297 | 0.179 | 0.306 | 0.152 |                                                                                                                                    |
|             |                                                                           | 580   | 2.922 | 2.939 | 2.297 | 0.181 | 0.309 | 0.152 |                                                                                                                                    |
|             |                                                                           | 590   | 2.946 | 2.943 | 2.297 | 0.183 | 0.311 | 0.152 |                                                                                                                                    |
|             |                                                                           | 600   | 2.941 | 2.948 | 2.297 | 0.185 | 0.314 | 0.152 |                                                                                                                                    |
| GFET<br>#S7 | $c^{(CEA)} = 2$<br>nM<br>$c^{(AFP)} = 20$<br>nM<br>$c^{(PTH)} = 20$<br>nM | -50   | 2.288 | 2.318 |       |       |       |       | $\tilde{c}^{(CEA)} \approx$<br>3.0243 nM<br>$\tilde{c}^{(AFP)} \approx$<br>11.9865 nM<br>$\tilde{c}^{(PTH)} \approx$<br>36.5784 nM |
|             |                                                                           | -40   | 2.319 | 2.318 |       |       |       |       |                                                                                                                                    |
|             |                                                                           | -30   | 2.320 | 2.318 | -     | -     | -     | -     |                                                                                                                                    |
|             |                                                                           | -20   | 2.315 | 2.318 |       |       |       |       |                                                                                                                                    |
|             |                                                                           | -10   | 2.337 | 2.318 |       |       |       |       |                                                                                                                                    |
|             |                                                                           | 0     | 2.325 | 2.318 | 2.318 | 0.000 | 0.000 | 0.000 |                                                                                                                                    |
|             |                                                                           | 10    | 2.384 | 2.393 | 2.318 | 0.005 | 0.009 | 0.061 |                                                                                                                                    |
|             |                                                                           | 20    | 2.450 | 2.447 | 2.318 | 0.010 | 0.017 | 0.102 |                                                                                                                                    |
|             |                                                                           | 30    | 2.457 | 2.488 | 2.318 | 0.015 | 0.025 | 0.130 |                                                                                                                                    |
|             |                                                                           | 40    | 2.531 | 2.520 | 2.318 | 0.019 | 0.033 | 0.149 |                                                                                                                                    |
|             |                                                                           | 50    | 2.546 | 2.545 | 2.318 | 0.024 | 0.041 | 0.161 |                                                                                                                                    |
|             |                                                                           | 60    | 2.552 | 2.565 | 2.318 | 0.029 | 0.049 | 0.170 |                                                                                                                                    |
|             |                                                                           | 70    | 2.588 | 2.583 | 2.318 | 0.033 | 0.057 | 0.175 |                                                                                                                                    |
|             |                                                                           | 80    | 2.608 | 2.599 | 2.318 | 0.038 | 0.064 | 0.179 |                                                                                                                                    |
|             |                                                                           | 90    | 2.619 | 2.613 | 2.318 | 0.042 | 0.071 | 0.182 |                                                                                                                                    |
|             |                                                                           | 100   | 2.640 | 2.627 | 2.318 | 0.047 | 0.079 | 0.183 |                                                                                                                                    |
|             |                                                                           | 110   | 2.626 | 2.639 | 2.318 | 0.051 | 0.086 | 0.185 |                                                                                                                                    |
|             |                                                                           | 120   | 2.660 | 2.651 | 2.318 | 0.055 | 0.093 | 0.185 |                                                                                                                                    |
|             |                                                                           | 130   | 2.662 | 2.662 | 2.318 | 0.059 | 0.099 | 0.186 |                                                                                                                                    |
|             |                                                                           | 140   | 2.666 | 2.674 | 2.318 | 0.064 | 0.106 | 0.186 |                                                                                                                                    |
|             |                                                                           | 150   | 2.683 | 2.684 | 2.318 | 0.068 | 0.112 | 0.186 |                                                                                                                                    |
|             |                                                                           | 160   | 2.699 | 2.695 | 2.318 | 0.072 | 0.119 | 0.187 |                                                                                                                                    |
|             |                                                                           | 170   | 2.704 | 2.705 | 2.318 | 0.076 | 0.125 | 0.187 |                                                                                                                                    |
| 180         | 2.712                                                                     | 2.715 | 2.318 | 0.080 | 0.131 | 0.187 |       |       |                                                                                                                                    |
| 190         | 2.720                                                                     | 2.725 | 2.318 | 0.083 | 0.137 | 0.187 |       |       |                                                                                                                                    |
| 200         | 2.724                                                                     | 2.735 | 2.318 | 0.087 | 0.143 | 0.187 |       |       |                                                                                                                                    |
| 210         | 2.767                                                                     | 2.744 | 2.318 | 0.091 | 0.148 | 0.187 |       |       |                                                                                                                                    |
| 220         | 2.790                                                                     | 2.753 | 2.318 | 0.095 | 0.154 | 0.187 |       |       |                                                                                                                                    |

|             |                        |       |       |       |       |       |       |       |                                          |   |   |   |                                           |       |       |       |                                           |
|-------------|------------------------|-------|-------|-------|-------|-------|-------|-------|------------------------------------------|---|---|---|-------------------------------------------|-------|-------|-------|-------------------------------------------|
|             |                        | 230   | 2.770 | 2.763 | 2.318 | 0.098 | 0.159 | 0.187 |                                          |   |   |   |                                           |       |       |       |                                           |
|             |                        | 240   | 2.783 | 2.772 | 2.318 | 0.102 | 0.165 | 0.187 |                                          |   |   |   |                                           |       |       |       |                                           |
|             |                        | 250   | 2.802 | 2.780 | 2.318 | 0.106 | 0.170 | 0.187 |                                          |   |   |   |                                           |       |       |       |                                           |
|             |                        | 260   | 2.808 | 2.789 | 2.318 | 0.109 | 0.175 | 0.187 |                                          |   |   |   |                                           |       |       |       |                                           |
|             |                        | 270   | 2.799 | 2.797 | 2.318 | 0.113 | 0.180 | 0.187 |                                          |   |   |   |                                           |       |       |       |                                           |
|             |                        | 280   | 2.808 | 2.806 | 2.318 | 0.116 | 0.185 | 0.187 |                                          |   |   |   |                                           |       |       |       |                                           |
|             |                        | 290   | 2.801 | 2.814 | 2.318 | 0.119 | 0.190 | 0.187 |                                          |   |   |   |                                           |       |       |       |                                           |
|             |                        | 300   | 2.815 | 2.822 | 2.318 | 0.123 | 0.195 | 0.187 |                                          |   |   |   |                                           |       |       |       |                                           |
|             |                        | 310   | 2.827 | 2.830 | 2.318 | 0.126 | 0.199 | 0.187 |                                          |   |   |   |                                           |       |       |       |                                           |
|             |                        | 320   | 2.854 | 2.838 | 2.318 | 0.129 | 0.204 | 0.187 |                                          |   |   |   |                                           |       |       |       |                                           |
|             |                        | 330   | 2.827 | 2.845 | 2.318 | 0.132 | 0.208 | 0.187 |                                          |   |   |   |                                           |       |       |       |                                           |
|             |                        | 340   | 2.856 | 2.853 | 2.318 | 0.135 | 0.213 | 0.187 |                                          |   |   |   |                                           |       |       |       |                                           |
|             |                        | 350   | 2.883 | 2.860 | 2.318 | 0.139 | 0.217 | 0.187 |                                          |   |   |   |                                           |       |       |       |                                           |
|             |                        | 360   | 2.874 | 2.867 | 2.318 | 0.142 | 0.221 | 0.187 |                                          |   |   |   |                                           |       |       |       |                                           |
|             |                        | 370   | 2.883 | 2.875 | 2.318 | 0.145 | 0.225 | 0.187 |                                          |   |   |   |                                           |       |       |       |                                           |
|             |                        | 380   | 2.884 | 2.882 | 2.318 | 0.148 | 0.229 | 0.187 |                                          |   |   |   |                                           |       |       |       |                                           |
|             |                        | 390   | 2.904 | 2.888 | 2.318 | 0.150 | 0.233 | 0.187 |                                          |   |   |   |                                           |       |       |       |                                           |
|             |                        | 400   | 2.898 | 2.895 | 2.318 | 0.153 | 0.237 | 0.187 |                                          |   |   |   |                                           |       |       |       |                                           |
|             |                        | 410   | 2.868 | 2.902 | 2.318 | 0.156 | 0.241 | 0.187 |                                          |   |   |   |                                           |       |       |       |                                           |
|             |                        | 420   | 2.912 | 2.908 | 2.318 | 0.159 | 0.244 | 0.187 |                                          |   |   |   |                                           |       |       |       |                                           |
|             |                        | 430   | 2.908 | 2.915 | 2.318 | 0.162 | 0.248 | 0.187 |                                          |   |   |   |                                           |       |       |       |                                           |
|             |                        | 440   | 2.956 | 2.921 | 2.318 | 0.165 | 0.252 | 0.187 |                                          |   |   |   |                                           |       |       |       |                                           |
|             |                        | 450   | 2.942 | 2.927 | 2.318 | 0.167 | 0.255 | 0.187 |                                          |   |   |   |                                           |       |       |       |                                           |
|             |                        | 460   | 2.940 | 2.933 | 2.318 | 0.170 | 0.258 | 0.187 |                                          |   |   |   |                                           |       |       |       |                                           |
|             |                        | 470   | 2.944 | 2.939 | 2.318 | 0.173 | 0.262 | 0.187 |                                          |   |   |   |                                           |       |       |       |                                           |
|             |                        | 480   | 2.958 | 2.945 | 2.318 | 0.175 | 0.265 | 0.187 |                                          |   |   |   |                                           |       |       |       |                                           |
|             |                        | 490   | 2.952 | 2.951 | 2.318 | 0.178 | 0.268 | 0.187 |                                          |   |   |   |                                           |       |       |       |                                           |
|             |                        | 500   | 2.967 | 2.956 | 2.318 | 0.180 | 0.271 | 0.187 |                                          |   |   |   |                                           |       |       |       |                                           |
|             |                        | 510   | 2.971 | 2.962 | 2.318 | 0.183 | 0.274 | 0.187 |                                          |   |   |   |                                           |       |       |       |                                           |
|             |                        | 520   | 2.960 | 2.967 | 2.318 | 0.185 | 0.277 | 0.187 |                                          |   |   |   |                                           |       |       |       |                                           |
|             |                        | 530   | 2.977 | 2.973 | 2.318 | 0.188 | 0.280 | 0.187 |                                          |   |   |   |                                           |       |       |       |                                           |
|             |                        | 540   | 2.977 | 2.978 | 2.318 | 0.190 | 0.283 | 0.187 |                                          |   |   |   |                                           |       |       |       |                                           |
|             |                        | 550   | 2.997 | 2.983 | 2.318 | 0.192 | 0.286 | 0.187 |                                          |   |   |   |                                           |       |       |       |                                           |
|             |                        | 560   | 3.029 | 2.988 | 2.318 | 0.195 | 0.289 | 0.187 |                                          |   |   |   |                                           |       |       |       |                                           |
|             |                        | 570   | 3.009 | 2.993 | 2.318 | 0.197 | 0.291 | 0.187 |                                          |   |   |   |                                           |       |       |       |                                           |
|             |                        | 580   | 2.986 | 2.998 | 2.318 | 0.199 | 0.294 | 0.187 |                                          |   |   |   |                                           |       |       |       |                                           |
|             |                        | 590   | 3.005 | 3.003 | 2.318 | 0.201 | 0.297 | 0.187 |                                          |   |   |   |                                           |       |       |       |                                           |
|             |                        | 600   | 3.042 | 3.008 | 2.318 | 0.204 | 0.299 | 0.187 |                                          |   |   |   |                                           |       |       |       |                                           |
| GFET<br>#S8 | $c^{(CEA)} = 2$<br>nM  | -50   | 2.330 | 2.323 | -     | -     | -     | -     | $\tilde{c}^{(CEA)} \approx$<br>3.2986 nM |   |   |   |                                           |       |       |       |                                           |
|             |                        | -40   | 2.311 | 2.323 |       |       |       |       |                                          |   |   |   |                                           |       |       |       |                                           |
|             |                        | -30   | 2.313 | 2.323 |       |       |       |       |                                          |   |   |   |                                           |       |       |       |                                           |
|             | $c^{(AFP)} = 20$<br>nM | -20   | 2.303 | 2.323 |       |       |       |       | -                                        | - | - | - | $\tilde{c}^{(AFP)} \approx$<br>11.4302 nM |       |       |       |                                           |
|             |                        | -10   | 2.313 | 2.323 |       |       |       |       |                                          |   |   |   |                                           |       |       |       |                                           |
|             | $c^{(PTH)} = 50$<br>nM | 0     | 2.341 | 2.323 |       |       |       |       |                                          |   |   |   | 2.323                                     | 0.000 | 0.000 | 0.000 | $\tilde{c}^{(PTH)} \approx$<br>97.3641 nM |
|             |                        | 10    | 2.455 | 2.440 |       |       |       |       |                                          |   |   |   | 2.323                                     | 0.006 | 0.007 | 0.104 |                                           |
| 20          |                        | 2.504 | 2.490 | 2.323 | 0.011 | 0.014 | 0.142 |       |                                          |   |   |   |                                           |       |       |       |                                           |

|     |       |       |       |       |       |       |
|-----|-------|-------|-------|-------|-------|-------|
| 30  | 2.522 | 2.516 | 2.323 | 0.017 | 0.021 | 0.155 |
| 40  | 2.532 | 2.533 | 2.323 | 0.022 | 0.028 | 0.160 |
| 50  | 2.572 | 2.547 | 2.323 | 0.028 | 0.034 | 0.162 |
| 60  | 2.585 | 2.560 | 2.323 | 0.033 | 0.041 | 0.163 |
| 70  | 2.571 | 2.571 | 2.323 | 0.038 | 0.047 | 0.163 |
| 80  | 2.587 | 2.583 | 2.323 | 0.043 | 0.053 | 0.163 |
| 90  | 2.586 | 2.594 | 2.323 | 0.048 | 0.059 | 0.163 |
| 100 | 2.608 | 2.605 | 2.323 | 0.053 | 0.065 | 0.163 |
| 110 | 2.616 | 2.615 | 2.323 | 0.058 | 0.071 | 0.163 |
| 120 | 2.638 | 2.626 | 2.323 | 0.063 | 0.077 | 0.163 |
| 130 | 2.628 | 2.636 | 2.323 | 0.068 | 0.082 | 0.163 |
| 140 | 2.634 | 2.647 | 2.323 | 0.072 | 0.088 | 0.163 |
| 150 | 2.647 | 2.657 | 2.323 | 0.077 | 0.093 | 0.163 |
| 160 | 2.659 | 2.666 | 2.323 | 0.082 | 0.098 | 0.163 |
| 170 | 2.667 | 2.676 | 2.323 | 0.086 | 0.103 | 0.163 |
| 180 | 2.698 | 2.685 | 2.323 | 0.091 | 0.108 | 0.163 |
| 190 | 2.687 | 2.695 | 2.323 | 0.095 | 0.113 | 0.163 |
| 200 | 2.714 | 2.704 | 2.323 | 0.099 | 0.118 | 0.163 |
| 210 | 2.720 | 2.713 | 2.323 | 0.103 | 0.123 | 0.163 |
| 220 | 2.725 | 2.722 | 2.323 | 0.108 | 0.128 | 0.163 |
| 230 | 2.753 | 2.730 | 2.323 | 0.112 | 0.132 | 0.163 |
| 240 | 2.768 | 2.739 | 2.323 | 0.116 | 0.137 | 0.163 |
| 250 | 2.755 | 2.747 | 2.323 | 0.120 | 0.141 | 0.163 |
| 260 | 2.769 | 2.756 | 2.323 | 0.124 | 0.145 | 0.163 |
| 270 | 2.775 | 2.764 | 2.323 | 0.128 | 0.150 | 0.163 |
| 280 | 2.787 | 2.772 | 2.323 | 0.131 | 0.154 | 0.163 |
| 290 | 2.777 | 2.779 | 2.323 | 0.135 | 0.158 | 0.163 |
| 300 | 2.774 | 2.787 | 2.323 | 0.139 | 0.162 | 0.163 |
| 310 | 2.817 | 2.795 | 2.323 | 0.142 | 0.166 | 0.163 |
| 320 | 2.824 | 2.802 | 2.323 | 0.146 | 0.169 | 0.163 |
| 330 | 2.795 | 2.809 | 2.323 | 0.150 | 0.173 | 0.163 |
| 340 | 2.788 | 2.816 | 2.323 | 0.153 | 0.177 | 0.163 |
| 350 | 2.821 | 2.823 | 2.323 | 0.157 | 0.180 | 0.163 |
| 360 | 2.853 | 2.830 | 2.323 | 0.160 | 0.184 | 0.163 |
| 370 | 2.825 | 2.837 | 2.323 | 0.163 | 0.187 | 0.163 |
| 380 | 2.874 | 2.844 | 2.323 | 0.167 | 0.191 | 0.163 |
| 390 | 2.846 | 2.850 | 2.323 | 0.170 | 0.194 | 0.163 |
| 400 | 2.862 | 2.857 | 2.323 | 0.173 | 0.197 | 0.163 |
| 410 | 2.857 | 2.863 | 2.323 | 0.176 | 0.201 | 0.163 |
| 420 | 2.853 | 2.869 | 2.323 | 0.179 | 0.204 | 0.163 |
| 430 | 2.881 | 2.875 | 2.323 | 0.182 | 0.207 | 0.163 |
| 440 | 2.874 | 2.881 | 2.323 | 0.185 | 0.210 | 0.163 |
| 450 | 2.892 | 2.887 | 2.323 | 0.188 | 0.213 | 0.163 |
| 460 | 2.905 | 2.893 | 2.323 | 0.191 | 0.215 | 0.163 |
| 470 | 2.909 | 2.899 | 2.323 | 0.194 | 0.218 | 0.163 |
| 480 | 2.901 | 2.904 | 2.323 | 0.197 | 0.221 | 0.163 |

|             |                                                                          |       |       |       |       |       |       |       |                                                                                                                    |
|-------------|--------------------------------------------------------------------------|-------|-------|-------|-------|-------|-------|-------|--------------------------------------------------------------------------------------------------------------------|
|             |                                                                          | 490   | 2.884 | 2.910 | 2.323 | 0.200 | 0.224 | 0.163 |                                                                                                                    |
|             |                                                                          | 500   | 2.918 | 2.915 | 2.323 | 0.202 | 0.226 | 0.163 |                                                                                                                    |
|             |                                                                          | 510   | 2.908 | 2.921 | 2.323 | 0.205 | 0.229 | 0.163 |                                                                                                                    |
|             |                                                                          | 520   | 2.916 | 2.926 | 2.323 | 0.208 | 0.232 | 0.163 |                                                                                                                    |
|             |                                                                          | 530   | 2.946 | 2.931 | 2.323 | 0.210 | 0.234 | 0.163 |                                                                                                                    |
|             |                                                                          | 540   | 2.947 | 2.936 | 2.323 | 0.213 | 0.237 | 0.163 |                                                                                                                    |
|             |                                                                          | 550   | 2.947 | 2.941 | 2.323 | 0.216 | 0.239 | 0.163 |                                                                                                                    |
|             |                                                                          | 560   | 2.931 | 2.946 | 2.323 | 0.218 | 0.241 | 0.163 |                                                                                                                    |
|             |                                                                          | 570   | 2.954 | 2.951 | 2.323 | 0.221 | 0.244 | 0.163 |                                                                                                                    |
|             |                                                                          | 580   | 2.970 | 2.955 | 2.323 | 0.223 | 0.246 | 0.163 |                                                                                                                    |
|             |                                                                          | 590   | 2.942 | 2.960 | 2.323 | 0.225 | 0.248 | 0.163 |                                                                                                                    |
|             |                                                                          | 600   | 2.970 | 2.964 | 2.323 | 0.228 | 0.250 | 0.163 |                                                                                                                    |
| GFET<br>#S9 | $c^{(CEA)} = 2$<br>nM<br>$c^{(AFP)} = 50$<br>nM<br>$c^{(PTH)} = 2$<br>nM | -50   | 2.334 | 2.322 |       |       |       |       | $\hat{c}^{(CEA)} \approx 3.5423$ nM<br>$\hat{c}^{(AFP)} \approx 24.7853$ nM<br>$\hat{c}^{(PTH)} \approx 4.8765$ nM |
|             |                                                                          | -40   | 2.334 | 2.322 |       |       |       |       |                                                                                                                    |
|             |                                                                          | -30   | 2.314 | 2.322 | -     | -     | -     | -     |                                                                                                                    |
|             |                                                                          | -20   | 2.320 | 2.322 |       |       |       |       |                                                                                                                    |
|             |                                                                          | -10   | 2.318 | 2.322 |       |       |       |       |                                                                                                                    |
|             |                                                                          | 0     | 2.309 | 2.322 | 2.322 | 0.000 | 0.000 | 0.000 |                                                                                                                    |
|             |                                                                          | 10    | 2.357 | 2.357 | 2.322 | 0.004 | 0.015 | 0.016 |                                                                                                                    |
|             |                                                                          | 20    | 2.391 | 2.391 | 2.322 | 0.008 | 0.030 | 0.031 |                                                                                                                    |
|             |                                                                          | 30    | 2.404 | 2.423 | 2.322 | 0.012 | 0.044 | 0.044 |                                                                                                                    |
|             |                                                                          | 40    | 2.452 | 2.453 | 2.322 | 0.016 | 0.058 | 0.057 |                                                                                                                    |
|             |                                                                          | 50    | 2.467 | 2.482 | 2.322 | 0.019 | 0.072 | 0.069 |                                                                                                                    |
|             |                                                                          | 60    | 2.499 | 2.510 | 2.322 | 0.023 | 0.085 | 0.080 |                                                                                                                    |
|             |                                                                          | 70    | 2.538 | 2.536 | 2.322 | 0.027 | 0.097 | 0.090 |                                                                                                                    |
|             |                                                                          | 80    | 2.560 | 2.561 | 2.322 | 0.030 | 0.109 | 0.099 |                                                                                                                    |
|             |                                                                          | 90    | 2.584 | 2.585 | 2.322 | 0.034 | 0.121 | 0.108 |                                                                                                                    |
|             |                                                                          | 100   | 2.617 | 2.608 | 2.322 | 0.037 | 0.132 | 0.116 |                                                                                                                    |
|             |                                                                          | 110   | 2.617 | 2.630 | 2.322 | 0.041 | 0.143 | 0.124 |                                                                                                                    |
|             |                                                                          | 120   | 2.631 | 2.651 | 2.322 | 0.044 | 0.154 | 0.131 |                                                                                                                    |
|             |                                                                          | 130   | 2.655 | 2.671 | 2.322 | 0.048 | 0.164 | 0.137 |                                                                                                                    |
|             |                                                                          | 140   | 2.695 | 2.691 | 2.322 | 0.051 | 0.174 | 0.143 |                                                                                                                    |
|             |                                                                          | 150   | 2.690 | 2.709 | 2.322 | 0.054 | 0.184 | 0.149 |                                                                                                                    |
|             |                                                                          | 160   | 2.732 | 2.727 | 2.322 | 0.057 | 0.193 | 0.154 |                                                                                                                    |
|             |                                                                          | 170   | 2.736 | 2.744 | 2.322 | 0.060 | 0.202 | 0.159 |                                                                                                                    |
|             |                                                                          | 180   | 2.739 | 2.760 | 2.322 | 0.063 | 0.211 | 0.164 |                                                                                                                    |
|             |                                                                          | 190   | 2.753 | 2.776 | 2.322 | 0.067 | 0.219 | 0.168 |                                                                                                                    |
|             |                                                                          | 200   | 2.773 | 2.791 | 2.322 | 0.069 | 0.227 | 0.172 |                                                                                                                    |
|             |                                                                          | 210   | 2.806 | 2.805 | 2.322 | 0.072 | 0.235 | 0.175 |                                                                                                                    |
|             |                                                                          | 220   | 2.809 | 2.819 | 2.322 | 0.075 | 0.243 | 0.179 |                                                                                                                    |
| 230         | 2.842                                                                    | 2.832 | 2.322 | 0.078 | 0.250 | 0.182 |       |       |                                                                                                                    |
| 240         | 2.849                                                                    | 2.845 | 2.322 | 0.081 | 0.257 | 0.185 |       |       |                                                                                                                    |
| 250         | 2.873                                                                    | 2.858 | 2.322 | 0.084 | 0.264 | 0.187 |       |       |                                                                                                                    |
| 260         | 2.847                                                                    | 2.869 | 2.322 | 0.086 | 0.271 | 0.190 |       |       |                                                                                                                    |
| 270         | 2.885                                                                    | 2.881 | 2.322 | 0.089 | 0.277 | 0.192 |       |       |                                                                                                                    |
| 280         | 2.913                                                                    | 2.892 | 2.322 | 0.092 | 0.283 | 0.194 |       |       |                                                                                                                    |

|              |                       |       |       |       |       |       |       |                                        |                                       |
|--------------|-----------------------|-------|-------|-------|-------|-------|-------|----------------------------------------|---------------------------------------|
|              |                       | 290   | 2.924 | 2.902 | 2.322 | 0.094 | 0.289 | 0.197                                  |                                       |
|              |                       | 300   | 2.921 | 2.913 | 2.322 | 0.097 | 0.295 | 0.198                                  |                                       |
|              |                       | 310   | 2.926 | 2.923 | 2.322 | 0.099 | 0.301 | 0.200                                  |                                       |
|              |                       | 320   | 2.931 | 2.932 | 2.322 | 0.102 | 0.306 | 0.202                                  |                                       |
|              |                       | 330   | 2.932 | 2.941 | 2.322 | 0.104 | 0.312 | 0.203                                  |                                       |
|              |                       | 340   | 2.934 | 2.950 | 2.322 | 0.107 | 0.317 | 0.205                                  |                                       |
|              |                       | 350   | 2.936 | 2.959 | 2.322 | 0.109 | 0.322 | 0.206                                  |                                       |
|              |                       | 360   | 2.976 | 2.967 | 2.322 | 0.111 | 0.326 | 0.207                                  |                                       |
|              |                       | 370   | 3.008 | 2.975 | 2.322 | 0.114 | 0.331 | 0.208                                  |                                       |
|              |                       | 380   | 2.994 | 2.983 | 2.322 | 0.116 | 0.335 | 0.209                                  |                                       |
|              |                       | 390   | 3.012 | 2.990 | 2.322 | 0.118 | 0.340 | 0.210                                  |                                       |
|              |                       | 400   | 3.008 | 2.997 | 2.322 | 0.120 | 0.344 | 0.211                                  |                                       |
|              |                       | 410   | 2.997 | 3.004 | 2.322 | 0.122 | 0.348 | 0.212                                  |                                       |
|              |                       | 420   | 3.014 | 3.011 | 2.322 | 0.125 | 0.352 | 0.213                                  |                                       |
|              |                       | 430   | 2.980 | 3.018 | 2.322 | 0.127 | 0.356 | 0.213                                  |                                       |
|              |                       | 440   | 3.006 | 3.024 | 2.322 | 0.129 | 0.359 | 0.214                                  |                                       |
|              |                       | 450   | 3.032 | 3.030 | 2.322 | 0.131 | 0.363 | 0.215                                  |                                       |
|              |                       | 460   | 3.015 | 3.036 | 2.322 | 0.133 | 0.366 | 0.215                                  |                                       |
|              |                       | 470   | 3.034 | 3.042 | 2.322 | 0.135 | 0.369 | 0.216                                  |                                       |
|              |                       | 480   | 3.067 | 3.048 | 2.322 | 0.136 | 0.373 | 0.216                                  |                                       |
|              |                       | 490   | 3.057 | 3.053 | 2.322 | 0.138 | 0.376 | 0.217                                  |                                       |
|              |                       | 500   | 3.053 | 3.058 | 2.322 | 0.140 | 0.379 | 0.217                                  |                                       |
|              |                       | 510   | 3.058 | 3.064 | 2.322 | 0.142 | 0.382 | 0.218                                  |                                       |
|              |                       | 520   | 3.055 | 3.068 | 2.322 | 0.144 | 0.384 | 0.218                                  |                                       |
|              |                       | 530   | 3.072 | 3.073 | 2.322 | 0.146 | 0.387 | 0.218                                  |                                       |
|              |                       | 540   | 3.096 | 3.078 | 2.322 | 0.147 | 0.390 | 0.219                                  |                                       |
|              |                       | 550   | 3.080 | 3.083 | 2.322 | 0.149 | 0.392 | 0.219                                  |                                       |
|              |                       | 560   | 3.071 | 3.087 | 2.322 | 0.151 | 0.395 | 0.219                                  |                                       |
|              |                       | 570   | 3.074 | 3.091 | 2.322 | 0.152 | 0.397 | 0.220                                  |                                       |
|              |                       | 580   | 3.067 | 3.095 | 2.322 | 0.154 | 0.399 | 0.220                                  |                                       |
|              |                       | 590   | 3.091 | 3.099 | 2.322 | 0.156 | 0.402 | 0.220                                  |                                       |
|              |                       | 600   | 3.105 | 3.103 | 2.322 | 0.157 | 0.404 | 0.220                                  |                                       |
| GFET<br>#S10 | $c^{(CEA)} = 2$<br>nM | -50   | 2.281 | 2.293 | -     | -     | -     | -                                      | $\tilde{c}^{(CEA)} \approx 1.9904$ nM |
|              |                       | -40   | 2.293 | 2.293 |       |       |       |                                        |                                       |
|              |                       | -30   | 2.280 | 2.293 |       |       |       |                                        |                                       |
|              |                       | -20   | 2.299 | 2.293 |       |       |       |                                        |                                       |
|              |                       | -10   | 2.287 | 2.293 |       |       |       |                                        |                                       |
|              | 0                     | 2.295 | 2.293 | 2.293 | 0.000 | 0.000 | 0.000 | $\tilde{c}^{(AFP)} \approx 23.9800$ nM |                                       |
|              | 10                    | 2.330 | 2.335 | 2.293 | 0.003 | 0.015 | 0.024 |                                        |                                       |
|              | 20                    | 2.367 | 2.373 | 2.293 | 0.006 | 0.029 | 0.045 |                                        |                                       |
|              | $c^{(PTH)} = 5$<br>nM | 30    | 2.393 | 2.409 | 2.293 | 0.008 | 0.043 | 0.064                                  | $\tilde{c}^{(PTH)} \approx 9.2215$ nM |
|              |                       | 40    | 2.435 | 2.442 | 2.293 | 0.011 | 0.057 | 0.081                                  |                                       |
|              |                       | 50    | 2.444 | 2.473 | 2.293 | 0.014 | 0.070 | 0.096                                  |                                       |
|              |                       | 60    | 2.513 | 2.501 | 2.293 | 0.017 | 0.083 | 0.109                                  |                                       |
|              |                       | 70    | 2.527 | 2.528 | 2.293 | 0.019 | 0.095 | 0.121                                  |                                       |
| 80           |                       | 2.538 | 2.553 | 2.293 | 0.022 | 0.107 | 0.131 |                                        |                                       |

|     |       |       |       |       |       |       |
|-----|-------|-------|-------|-------|-------|-------|
| 90  | 2.571 | 2.577 | 2.293 | 0.025 | 0.119 | 0.141 |
| 100 | 2.589 | 2.599 | 2.293 | 0.027 | 0.130 | 0.149 |
| 110 | 2.637 | 2.619 | 2.293 | 0.030 | 0.140 | 0.156 |
| 120 | 2.648 | 2.639 | 2.293 | 0.032 | 0.151 | 0.163 |
| 130 | 2.666 | 2.657 | 2.293 | 0.035 | 0.161 | 0.169 |
| 140 | 2.708 | 2.675 | 2.293 | 0.037 | 0.171 | 0.174 |
| 150 | 2.707 | 2.691 | 2.293 | 0.040 | 0.180 | 0.178 |
| 160 | 2.731 | 2.707 | 2.293 | 0.042 | 0.189 | 0.183 |
| 170 | 2.732 | 2.722 | 2.293 | 0.045 | 0.198 | 0.186 |
| 180 | 2.728 | 2.736 | 2.293 | 0.047 | 0.207 | 0.189 |
| 190 | 2.711 | 2.750 | 2.293 | 0.049 | 0.215 | 0.192 |
| 200 | 2.752 | 2.763 | 2.293 | 0.052 | 0.223 | 0.195 |
| 210 | 2.765 | 2.775 | 2.293 | 0.054 | 0.231 | 0.197 |
| 220 | 2.803 | 2.787 | 2.293 | 0.056 | 0.239 | 0.199 |
| 230 | 2.796 | 2.798 | 2.293 | 0.059 | 0.246 | 0.201 |
| 240 | 2.823 | 2.809 | 2.293 | 0.061 | 0.253 | 0.202 |
| 250 | 2.844 | 2.820 | 2.293 | 0.063 | 0.260 | 0.204 |
| 260 | 2.826 | 2.830 | 2.293 | 0.065 | 0.266 | 0.205 |
| 270 | 2.848 | 2.839 | 2.293 | 0.067 | 0.273 | 0.206 |
| 280 | 2.855 | 2.849 | 2.293 | 0.070 | 0.279 | 0.207 |
| 290 | 2.863 | 2.858 | 2.293 | 0.072 | 0.285 | 0.208 |
| 300 | 2.861 | 2.866 | 2.293 | 0.074 | 0.291 | 0.209 |
| 310 | 2.889 | 2.875 | 2.293 | 0.076 | 0.296 | 0.210 |
| 320 | 2.884 | 2.883 | 2.293 | 0.078 | 0.302 | 0.210 |
| 330 | 2.887 | 2.891 | 2.293 | 0.080 | 0.307 | 0.211 |
| 340 | 2.903 | 2.898 | 2.293 | 0.082 | 0.312 | 0.211 |
| 350 | 2.893 | 2.906 | 2.293 | 0.084 | 0.317 | 0.212 |
| 360 | 2.920 | 2.913 | 2.293 | 0.086 | 0.322 | 0.212 |
| 370 | 2.913 | 2.920 | 2.293 | 0.088 | 0.327 | 0.212 |
| 380 | 2.930 | 2.927 | 2.293 | 0.090 | 0.331 | 0.213 |
| 390 | 2.958 | 2.933 | 2.293 | 0.092 | 0.335 | 0.213 |
| 400 | 2.938 | 2.939 | 2.293 | 0.094 | 0.340 | 0.213 |
| 410 | 2.980 | 2.946 | 2.293 | 0.096 | 0.344 | 0.213 |
| 420 | 2.947 | 2.952 | 2.293 | 0.098 | 0.348 | 0.214 |
| 430 | 2.982 | 2.957 | 2.293 | 0.099 | 0.351 | 0.214 |
| 440 | 2.968 | 2.963 | 2.293 | 0.101 | 0.355 | 0.214 |
| 450 | 2.979 | 2.969 | 2.293 | 0.103 | 0.359 | 0.214 |
| 460 | 2.991 | 2.974 | 2.293 | 0.105 | 0.362 | 0.214 |
| 470 | 2.989 | 2.979 | 2.293 | 0.107 | 0.365 | 0.214 |
| 480 | 2.994 | 2.984 | 2.293 | 0.108 | 0.369 | 0.214 |
| 490 | 2.987 | 2.989 | 2.293 | 0.110 | 0.372 | 0.214 |
| 500 | 2.994 | 2.994 | 2.293 | 0.112 | 0.375 | 0.215 |
| 510 | 2.987 | 2.999 | 2.293 | 0.114 | 0.378 | 0.215 |
| 520 | 3.002 | 3.003 | 2.293 | 0.115 | 0.381 | 0.215 |
| 530 | 3.006 | 3.008 | 2.293 | 0.117 | 0.383 | 0.215 |
| 540 | 3.015 | 3.012 | 2.293 | 0.119 | 0.386 | 0.215 |



|              |                                                                           |       |       |       |       |       |       |       |                                                                                                                                    |
|--------------|---------------------------------------------------------------------------|-------|-------|-------|-------|-------|-------|-------|------------------------------------------------------------------------------------------------------------------------------------|
|              |                                                                           | 550   | 2.996 | 3.016 | 2.293 | 0.120 | 0.389 | 0.215 |                                                                                                                                    |
|              |                                                                           | 560   | 3.029 | 3.021 | 2.293 | 0.122 | 0.391 | 0.215 |                                                                                                                                    |
|              |                                                                           | 570   | 3.021 | 3.025 | 2.293 | 0.124 | 0.393 | 0.215 |                                                                                                                                    |
|              |                                                                           | 580   | 3.029 | 3.029 | 2.293 | 0.125 | 0.396 | 0.215 |                                                                                                                                    |
|              |                                                                           | 590   | 3.039 | 3.032 | 2.293 | 0.127 | 0.398 | 0.215 |                                                                                                                                    |
|              |                                                                           | 600   | 3.038 | 3.036 | 2.293 | 0.128 | 0.400 | 0.215 |                                                                                                                                    |
| GFET<br>#S11 | $c^{(CEA)} = 2$<br>nM<br>$c^{(AFP)} = 50$<br>nM<br>$c^{(PTH)} = 20$<br>nM | -50   | 2.299 | 2.296 | -     | -     | -     | -     | $\tilde{c}^{(CEA)} \approx$<br>2.4601 nM<br>$\tilde{c}^{(AFP)} \approx$<br>25.0922 nM<br>$\tilde{c}^{(PTH)} \approx$<br>35.0711 nM |
|              |                                                                           | -40   | 2.284 | 2.296 |       |       |       |       |                                                                                                                                    |
|              |                                                                           | -30   | 2.317 | 2.296 |       |       |       |       |                                                                                                                                    |
|              |                                                                           | -20   | 2.304 | 2.296 |       |       |       |       |                                                                                                                                    |
|              |                                                                           | -10   | 2.286 | 2.296 |       |       |       |       |                                                                                                                                    |
|              |                                                                           | 0     | 2.292 | 2.296 | 2.296 | 0.000 | 0.000 | 0.000 |                                                                                                                                    |
|              |                                                                           | 10    | 2.386 | 2.373 | 2.296 | 0.003 | 0.018 | 0.056 |                                                                                                                                    |
|              |                                                                           | 20    | 2.425 | 2.432 | 2.296 | 0.007 | 0.035 | 0.094 |                                                                                                                                    |
|              |                                                                           | 30    | 2.478 | 2.478 | 2.296 | 0.010 | 0.051 | 0.120 |                                                                                                                                    |
|              |                                                                           | 40    | 2.530 | 2.515 | 2.296 | 0.014 | 0.067 | 0.138 |                                                                                                                                    |
|              |                                                                           | 50    | 2.552 | 2.546 | 2.296 | 0.017 | 0.082 | 0.150 |                                                                                                                                    |
|              |                                                                           | 60    | 2.600 | 2.572 | 2.296 | 0.020 | 0.097 | 0.159 |                                                                                                                                    |
|              |                                                                           | 70    | 2.592 | 2.596 | 2.296 | 0.023 | 0.111 | 0.164 |                                                                                                                                    |
|              |                                                                           | 80    | 2.602 | 2.616 | 2.296 | 0.027 | 0.125 | 0.168 |                                                                                                                                    |
|              |                                                                           | 90    | 2.633 | 2.636 | 2.296 | 0.030 | 0.139 | 0.171 |                                                                                                                                    |
|              |                                                                           | 100   | 2.654 | 2.654 | 2.296 | 0.033 | 0.151 | 0.173 |                                                                                                                                    |
|              |                                                                           | 110   | 2.661 | 2.670 | 2.296 | 0.036 | 0.164 | 0.174 |                                                                                                                                    |
|              |                                                                           | 120   | 2.670 | 2.686 | 2.296 | 0.039 | 0.176 | 0.175 |                                                                                                                                    |
|              |                                                                           | 130   | 2.686 | 2.702 | 2.296 | 0.042 | 0.188 | 0.175 |                                                                                                                                    |
|              |                                                                           | 140   | 2.717 | 2.716 | 2.296 | 0.045 | 0.199 | 0.176 |                                                                                                                                    |
|              |                                                                           | 150   | 2.722 | 2.730 | 2.296 | 0.048 | 0.210 | 0.176 |                                                                                                                                    |
|              |                                                                           | 160   | 2.756 | 2.744 | 2.296 | 0.051 | 0.221 | 0.176 |                                                                                                                                    |
|              |                                                                           | 170   | 2.754 | 2.757 | 2.296 | 0.054 | 0.231 | 0.176 |                                                                                                                                    |
|              |                                                                           | 180   | 2.761 | 2.770 | 2.296 | 0.056 | 0.241 | 0.176 |                                                                                                                                    |
|              |                                                                           | 190   | 2.786 | 2.783 | 2.296 | 0.059 | 0.250 | 0.176 |                                                                                                                                    |
|              |                                                                           | 200   | 2.783 | 2.795 | 2.296 | 0.062 | 0.260 | 0.177 |                                                                                                                                    |
|              |                                                                           | 210   | 2.788 | 2.806 | 2.296 | 0.065 | 0.269 | 0.177 |                                                                                                                                    |
|              |                                                                           | 220   | 2.827 | 2.818 | 2.296 | 0.068 | 0.277 | 0.177 |                                                                                                                                    |
|              |                                                                           | 230   | 2.812 | 2.829 | 2.296 | 0.070 | 0.286 | 0.177 |                                                                                                                                    |
|              |                                                                           | 240   | 2.848 | 2.839 | 2.296 | 0.073 | 0.294 | 0.177 |                                                                                                                                    |
|              |                                                                           | 250   | 2.848 | 2.850 | 2.296 | 0.075 | 0.301 | 0.177 |                                                                                                                                    |
|              |                                                                           | 260   | 2.884 | 2.860 | 2.296 | 0.078 | 0.309 | 0.177 |                                                                                                                                    |
|              |                                                                           | 270   | 2.869 | 2.870 | 2.296 | 0.081 | 0.316 | 0.177 |                                                                                                                                    |
|              |                                                                           | 280   | 2.891 | 2.879 | 2.296 | 0.083 | 0.323 | 0.177 |                                                                                                                                    |
| 290          | 2.883                                                                     | 2.889 | 2.296 | 0.086 | 0.330 | 0.177 |       |       |                                                                                                                                    |
| 300          | 2.911                                                                     | 2.898 | 2.296 | 0.088 | 0.337 | 0.177 |       |       |                                                                                                                                    |
| 310          | 2.908                                                                     | 2.907 | 2.296 | 0.090 | 0.343 | 0.177 |       |       |                                                                                                                                    |
| 320          | 2.934                                                                     | 2.915 | 2.296 | 0.093 | 0.349 | 0.177 |       |       |                                                                                                                                    |
| 330          | 2.929                                                                     | 2.924 | 2.296 | 0.095 | 0.355 | 0.177 |       |       |                                                                                                                                    |
| 340          | 2.906                                                                     | 2.932 | 2.296 | 0.098 | 0.361 | 0.177 |       |       |                                                                                                                                    |

|              |                        |       |       |       |       |       |       |       |                                       |                                         |
|--------------|------------------------|-------|-------|-------|-------|-------|-------|-------|---------------------------------------|-----------------------------------------|
|              |                        | 350   | 2.937 | 2.940 | 2.296 | 0.100 | 0.367 | 0.177 |                                       |                                         |
|              |                        | 360   | 2.959 | 2.947 | 2.296 | 0.102 | 0.372 | 0.177 |                                       |                                         |
|              |                        | 370   | 2.954 | 2.955 | 2.296 | 0.104 | 0.377 | 0.177 |                                       |                                         |
|              |                        | 380   | 2.976 | 2.962 | 2.296 | 0.107 | 0.382 | 0.177 |                                       |                                         |
|              |                        | 390   | 2.966 | 2.969 | 2.296 | 0.109 | 0.387 | 0.177 |                                       |                                         |
|              |                        | 400   | 2.952 | 2.976 | 2.296 | 0.111 | 0.392 | 0.177 |                                       |                                         |
|              |                        | 410   | 2.991 | 2.983 | 2.296 | 0.113 | 0.397 | 0.177 |                                       |                                         |
|              |                        | 420   | 2.999 | 2.989 | 2.296 | 0.115 | 0.401 | 0.177 |                                       |                                         |
|              |                        | 430   | 2.989 | 2.996 | 2.296 | 0.117 | 0.405 | 0.177 |                                       |                                         |
|              |                        | 440   | 3.013 | 3.002 | 2.296 | 0.120 | 0.409 | 0.177 |                                       |                                         |
|              |                        | 450   | 3.012 | 3.008 | 2.296 | 0.122 | 0.413 | 0.177 |                                       |                                         |
|              |                        | 460   | 3.023 | 3.014 | 2.296 | 0.124 | 0.417 | 0.177 |                                       |                                         |
|              |                        | 470   | 3.024 | 3.019 | 2.296 | 0.126 | 0.421 | 0.177 |                                       |                                         |
|              |                        | 480   | 3.052 | 3.025 | 2.296 | 0.128 | 0.424 | 0.177 |                                       |                                         |
|              |                        | 490   | 3.055 | 3.031 | 2.296 | 0.130 | 0.428 | 0.177 |                                       |                                         |
|              |                        | 500   | 3.053 | 3.036 | 2.296 | 0.132 | 0.431 | 0.177 |                                       |                                         |
|              |                        | 510   | 3.041 | 3.041 | 2.296 | 0.133 | 0.435 | 0.177 |                                       |                                         |
|              |                        | 520   | 3.056 | 3.046 | 2.296 | 0.135 | 0.438 | 0.177 |                                       |                                         |
|              |                        | 530   | 3.053 | 3.051 | 2.296 | 0.137 | 0.441 | 0.177 |                                       |                                         |
|              |                        | 540   | 3.058 | 3.056 | 2.296 | 0.139 | 0.444 | 0.177 |                                       |                                         |
|              |                        | 550   | 3.070 | 3.060 | 2.296 | 0.141 | 0.447 | 0.177 |                                       |                                         |
|              |                        | 560   | 3.051 | 3.065 | 2.296 | 0.143 | 0.449 | 0.177 |                                       |                                         |
|              |                        | 570   | 3.072 | 3.069 | 2.296 | 0.144 | 0.452 | 0.177 |                                       |                                         |
|              |                        | 580   | 3.076 | 3.074 | 2.296 | 0.146 | 0.454 | 0.177 |                                       |                                         |
|              |                        | 590   | 3.092 | 3.078 | 2.296 | 0.148 | 0.457 | 0.177 |                                       |                                         |
|              |                        | 600   | 3.093 | 3.082 | 2.296 | 0.150 | 0.459 | 0.177 |                                       |                                         |
| GFET<br>#S12 | $c^{(CEA)} = 2$<br>nM  | -50   | 2.343 | 2.344 | -     | -     | -     | -     | $\tilde{c}^{(CEA)} \approx 2.5403$ nM |                                         |
|              |                        | -40   | 2.335 | 2.344 |       |       |       |       |                                       |                                         |
|              |                        | -30   | 2.327 | 2.344 |       |       |       |       |                                       |                                         |
|              |                        | -20   | 2.354 | 2.344 |       |       |       |       |                                       |                                         |
|              |                        | -10   | 2.352 | 2.344 |       |       |       |       |                                       |                                         |
|              | 0                      | 2.355 | 2.344 | 2.344 | 0.000 | 0.000 | 0.000 |       |                                       |                                         |
|              | 10                     | 2.491 | 2.474 | 2.344 | 0.003 | 0.017 | 0.110 |       |                                       |                                         |
|              | 20                     | 2.513 | 2.528 | 2.344 | 0.007 | 0.033 | 0.144 |       |                                       |                                         |
|              | 30                     | 2.566 | 2.558 | 2.344 | 0.010 | 0.049 | 0.155 |       |                                       |                                         |
|              | $c^{(AFP)} = 50$<br>nM | 40    | 2.586 | 2.580 | 2.344 | 0.013 | 0.064 | 0.159 |                                       | $\tilde{c}^{(AFP)} \approx 24.3765$ nM  |
|              |                        | 50    | 2.583 | 2.599 | 2.344 | 0.017 | 0.079 | 0.160 |                                       |                                         |
|              | $c^{(PTH)} = 50$<br>nM | 60    | 2.604 | 2.617 | 2.344 | 0.020 | 0.093 | 0.160 |                                       | $\tilde{c}^{(PTH)} \approx 110.6315$ nM |
|              |                        | 70    | 2.637 | 2.634 | 2.344 | 0.023 | 0.107 | 0.160 |                                       |                                         |
|              |                        | 80    | 2.647 | 2.650 | 2.344 | 0.026 | 0.120 | 0.160 |                                       |                                         |
|              |                        | 90    | 2.660 | 2.666 | 2.344 | 0.029 | 0.133 | 0.160 |                                       |                                         |
|              |                        | 100   | 2.687 | 2.682 | 2.344 | 0.032 | 0.146 | 0.160 |                                       |                                         |
|              |                        | 110   | 2.700 | 2.697 | 2.344 | 0.035 | 0.158 | 0.160 |                                       |                                         |
| 120          |                        | 2.708 | 2.712 | 2.344 | 0.038 | 0.169 | 0.160 |       |                                       |                                         |
| 130          | 2.728                  | 2.726 | 2.344 | 0.041 | 0.181 | 0.160 |       |       |                                       |                                         |
| 140          | 2.747                  | 2.740 | 2.344 | 0.044 | 0.192 | 0.160 |       |       |                                       |                                         |

|     |       |       |       |       |       |       |
|-----|-------|-------|-------|-------|-------|-------|
| 150 | 2.772 | 2.753 | 2.344 | 0.047 | 0.202 | 0.160 |
| 160 | 2.793 | 2.766 | 2.344 | 0.050 | 0.213 | 0.160 |
| 170 | 2.789 | 2.779 | 2.344 | 0.052 | 0.222 | 0.160 |
| 180 | 2.806 | 2.791 | 2.344 | 0.055 | 0.232 | 0.160 |
| 190 | 2.806 | 2.803 | 2.344 | 0.058 | 0.241 | 0.160 |
| 200 | 2.792 | 2.815 | 2.344 | 0.061 | 0.250 | 0.160 |
| 210 | 2.836 | 2.826 | 2.344 | 0.063 | 0.259 | 0.160 |
| 220 | 2.836 | 2.837 | 2.344 | 0.066 | 0.267 | 0.160 |
| 230 | 2.841 | 2.848 | 2.344 | 0.068 | 0.276 | 0.160 |
| 240 | 2.855 | 2.859 | 2.344 | 0.071 | 0.283 | 0.160 |
| 250 | 2.856 | 2.869 | 2.344 | 0.074 | 0.291 | 0.160 |
| 260 | 2.908 | 2.879 | 2.344 | 0.076 | 0.298 | 0.160 |
| 270 | 2.895 | 2.888 | 2.344 | 0.079 | 0.306 | 0.160 |
| 280 | 2.919 | 2.898 | 2.344 | 0.081 | 0.312 | 0.160 |
| 290 | 2.925 | 2.907 | 2.344 | 0.083 | 0.319 | 0.160 |
| 300 | 2.917 | 2.916 | 2.344 | 0.086 | 0.326 | 0.160 |
| 310 | 2.946 | 2.924 | 2.344 | 0.088 | 0.332 | 0.160 |
| 320 | 2.949 | 2.933 | 2.344 | 0.090 | 0.338 | 0.160 |
| 330 | 2.955 | 2.941 | 2.344 | 0.093 | 0.344 | 0.160 |
| 340 | 2.943 | 2.949 | 2.344 | 0.095 | 0.349 | 0.160 |
| 350 | 2.958 | 2.956 | 2.344 | 0.097 | 0.355 | 0.160 |
| 360 | 2.968 | 2.964 | 2.344 | 0.099 | 0.360 | 0.160 |
| 370 | 2.973 | 2.971 | 2.344 | 0.102 | 0.365 | 0.160 |
| 380 | 2.986 | 2.978 | 2.344 | 0.104 | 0.370 | 0.160 |
| 390 | 2.982 | 2.985 | 2.344 | 0.106 | 0.375 | 0.160 |
| 400 | 2.973 | 2.992 | 2.344 | 0.108 | 0.380 | 0.160 |
| 410 | 3.009 | 2.999 | 2.344 | 0.110 | 0.384 | 0.160 |
| 420 | 3.017 | 3.005 | 2.344 | 0.112 | 0.389 | 0.160 |
| 430 | 3.006 | 3.011 | 2.344 | 0.114 | 0.393 | 0.160 |
| 440 | 3.006 | 3.017 | 2.344 | 0.116 | 0.397 | 0.160 |
| 450 | 3.018 | 3.023 | 2.344 | 0.118 | 0.401 | 0.160 |
| 460 | 3.025 | 3.029 | 2.344 | 0.120 | 0.405 | 0.160 |
| 470 | 3.045 | 3.035 | 2.344 | 0.122 | 0.408 | 0.160 |
| 480 | 3.046 | 3.040 | 2.344 | 0.124 | 0.412 | 0.160 |
| 490 | 3.047 | 3.045 | 2.344 | 0.126 | 0.415 | 0.160 |
| 500 | 3.067 | 3.051 | 2.344 | 0.128 | 0.419 | 0.160 |
| 510 | 3.067 | 3.056 | 2.344 | 0.130 | 0.422 | 0.160 |
| 520 | 3.068 | 3.061 | 2.344 | 0.132 | 0.425 | 0.160 |
| 530 | 3.066 | 3.066 | 2.344 | 0.133 | 0.428 | 0.160 |
| 540 | 3.083 | 3.070 | 2.344 | 0.135 | 0.431 | 0.160 |
| 550 | 3.112 | 3.075 | 2.344 | 0.137 | 0.434 | 0.160 |
| 560 | 3.103 | 3.079 | 2.344 | 0.139 | 0.437 | 0.160 |
| 570 | 3.104 | 3.084 | 2.344 | 0.140 | 0.439 | 0.160 |
| 580 | 3.108 | 3.088 | 2.344 | 0.142 | 0.442 | 0.160 |
| 590 | 3.087 | 3.092 | 2.344 | 0.144 | 0.444 | 0.160 |
| 600 | 3.124 | 3.096 | 2.344 | 0.145 | 0.447 | 0.160 |

|              |                       |       |       |       |       |       |       |                                          |                                          |                                           |
|--------------|-----------------------|-------|-------|-------|-------|-------|-------|------------------------------------------|------------------------------------------|-------------------------------------------|
| GFET<br>#S13 | $c^{(CEA)} = 2$<br>nM | -50   | 2.311 | 2.314 | -     | -     | -     | -                                        | $\tilde{c}^{(CEA)} \approx$<br>2.9066 nM |                                           |
|              |                       | -40   | 2.298 | 2.314 |       |       |       |                                          |                                          |                                           |
|              |                       | -30   | 2.319 | 2.314 |       |       |       |                                          |                                          |                                           |
|              |                       | -20   | 2.312 | 2.314 |       |       |       |                                          |                                          |                                           |
|              |                       | -10   | 2.328 | 2.314 |       |       |       |                                          |                                          |                                           |
|              |                       | 0     | 2.318 | 2.314 | 2.314 | 0.000 | 0.000 | 0.000                                    |                                          | $\tilde{c}^{(AFP)} \approx$<br>61.6545 nM |
|              |                       | 10    | 2.372 | 2.360 | 2.314 | 0.004 | 0.035 | 0.007                                    |                                          |                                           |
|              |                       | 20    | 2.415 | 2.404 | 2.314 | 0.008 | 0.068 | 0.014                                    |                                          |                                           |
|              |                       | 30    | 2.456 | 2.445 | 2.314 | 0.012 | 0.099 | 0.021                                    |                                          |                                           |
|              |                       | 40    | 2.479 | 2.483 | 2.314 | 0.015 | 0.128 | 0.027                                    |                                          |                                           |
|              |                       | 50    | 2.527 | 2.520 | 2.314 | 0.019 | 0.155 | 0.032                                    |                                          |                                           |
|              |                       | 60    | 2.578 | 2.553 | 2.314 | 0.023 | 0.180 | 0.038                                    |                                          |                                           |
|              |                       | 70    | 2.600 | 2.585 | 2.314 | 0.026 | 0.203 | 0.043                                    |                                          |                                           |
|              |                       | 80    | 2.626 | 2.615 | 2.314 | 0.030 | 0.225 | 0.047                                    |                                          |                                           |
|              |                       | 90    | 2.629 | 2.643 | 2.314 | 0.033 | 0.245 | 0.052                                    |                                          |                                           |
|              |                       | 100   | 2.687 | 2.670 | 2.314 | 0.037 | 0.264 | 0.056                                    |                                          |                                           |
|              |                       | 110   | 2.707 | 2.695 | 2.314 | 0.040 | 0.281 | 0.059                                    |                                          |                                           |
|              |                       | 120   | 2.705 | 2.718 | 2.314 | 0.043 | 0.298 | 0.063                                    |                                          |                                           |
|              |                       | 130   | 2.754 | 2.740 | 2.314 | 0.047 | 0.313 | 0.066                                    |                                          |                                           |
|              |                       | 140   | 2.737 | 2.761 | 2.314 | 0.050 | 0.327 | 0.070                                    |                                          |                                           |
|              |                       | 150   | 2.796 | 2.780 | 2.314 | 0.053 | 0.341 | 0.073                                    |                                          |                                           |
|              |                       | 160   | 2.762 | 2.798 | 2.314 | 0.056 | 0.353 | 0.075                                    |                                          |                                           |
|              |                       | 170   | 2.823 | 2.816 | 2.314 | 0.060 | 0.365 | 0.078                                    |                                          |                                           |
|              |                       | 180   | 2.826 | 2.832 | 2.314 | 0.063 | 0.375 | 0.081                                    |                                          |                                           |
|              |                       | 190   | 2.863 | 2.847 | 2.314 | 0.066 | 0.385 | 0.083                                    |                                          |                                           |
|              |                       | 200   | 2.852 | 2.862 | 2.314 | 0.069 | 0.395 | 0.085                                    |                                          |                                           |
|              |                       | 210   | 2.868 | 2.876 | 2.314 | 0.072 | 0.404 | 0.087                                    |                                          |                                           |
|              |                       | 220   | 2.894 | 2.889 | 2.314 | 0.075 | 0.412 | 0.089                                    |                                          |                                           |
|              |                       | 230   | 2.898 | 2.901 | 2.314 | 0.078 | 0.419 | 0.091                                    |                                          |                                           |
|              |                       | 240   | 2.919 | 2.913 | 2.314 | 0.080 | 0.426 | 0.092                                    |                                          |                                           |
|              |                       | 250   | 2.945 | 2.924 | 2.314 | 0.083 | 0.433 | 0.094                                    |                                          |                                           |
|              |                       | 260   | 2.937 | 2.934 | 2.314 | 0.086 | 0.439 | 0.095                                    |                                          |                                           |
|              |                       | 270   | 2.947 | 2.944 | 2.314 | 0.089 | 0.445 | 0.097                                    |                                          |                                           |
|              |                       | 280   | 2.967 | 2.953 | 2.314 | 0.091 | 0.450 | 0.098                                    |                                          |                                           |
|              |                       | 290   | 2.973 | 2.962 | 2.314 | 0.094 | 0.455 | 0.099                                    |                                          |                                           |
|              |                       | 300   | 2.955 | 2.971 | 2.314 | 0.097 | 0.460 | 0.100                                    |                                          |                                           |
|              |                       | 310   | 2.998 | 2.979 | 2.314 | 0.099 | 0.464 | 0.102                                    |                                          |                                           |
|              |                       | 320   | 3.010 | 2.986 | 2.314 | 0.102 | 0.468 | 0.103                                    |                                          |                                           |
|              |                       | 330   | 2.983 | 2.993 | 2.314 | 0.104 | 0.472 | 0.103                                    |                                          |                                           |
|              |                       | 340   | 3.029 | 3.000 | 2.314 | 0.107 | 0.475 | 0.104                                    |                                          |                                           |
| 350          | 3.014                 | 3.007 | 2.314 | 0.109 | 0.479 | 0.105 |       |                                          |                                          |                                           |
| 360          | 3.019                 | 3.013 | 2.314 | 0.112 | 0.482 | 0.106 |       |                                          |                                          |                                           |
| 370          | 3.017                 | 3.019 | 2.314 | 0.114 | 0.485 | 0.107 |       |                                          |                                          |                                           |
| 380          | 3.019                 | 3.025 | 2.314 | 0.117 | 0.487 | 0.107 |       |                                          |                                          |                                           |
| 390          | 3.046                 | 3.030 | 2.314 | 0.119 | 0.490 | 0.108 |       |                                          |                                          |                                           |
| 400          | 3.053                 | 3.035 | 2.314 | 0.121 | 0.492 | 0.109 |       |                                          |                                          |                                           |
|              | $c^{(PTH)} = 2$<br>nM |       |       |       |       |       |       | $\tilde{c}^{(PTH)} \approx$<br>3.9356 nM |                                          |                                           |

|              |                         |       |       |       |       |       |       |                                        |                                       |       |                                       |
|--------------|-------------------------|-------|-------|-------|-------|-------|-------|----------------------------------------|---------------------------------------|-------|---------------------------------------|
|              |                         | 410   | 3.050 | 3.040 | 2.314 | 0.124 | 0.494 | 0.109                                  |                                       |       |                                       |
|              |                         | 420   | 3.054 | 3.045 | 2.314 | 0.126 | 0.496 | 0.110                                  |                                       |       |                                       |
|              |                         | 430   | 3.061 | 3.050 | 2.314 | 0.128 | 0.498 | 0.110                                  |                                       |       |                                       |
|              |                         | 440   | 3.072 | 3.054 | 2.314 | 0.130 | 0.500 | 0.111                                  |                                       |       |                                       |
|              |                         | 450   | 3.042 | 3.058 | 2.314 | 0.132 | 0.501 | 0.111                                  |                                       |       |                                       |
|              |                         | 460   | 3.060 | 3.062 | 2.314 | 0.135 | 0.503 | 0.112                                  |                                       |       |                                       |
|              |                         | 470   | 3.094 | 3.066 | 2.314 | 0.137 | 0.504 | 0.112                                  |                                       |       |                                       |
|              |                         | 480   | 3.082 | 3.070 | 2.314 | 0.139 | 0.506 | 0.112                                  |                                       |       |                                       |
|              |                         | 490   | 3.099 | 3.074 | 2.314 | 0.141 | 0.507 | 0.113                                  |                                       |       |                                       |
|              |                         | 500   | 3.064 | 3.077 | 2.314 | 0.143 | 0.508 | 0.113                                  |                                       |       |                                       |
|              |                         | 510   | 3.088 | 3.080 | 2.314 | 0.145 | 0.509 | 0.113                                  |                                       |       |                                       |
|              |                         | 520   | 3.102 | 3.084 | 2.314 | 0.147 | 0.510 | 0.113                                  |                                       |       |                                       |
|              |                         | 530   | 3.086 | 3.087 | 2.314 | 0.149 | 0.511 | 0.114                                  |                                       |       |                                       |
|              |                         | 540   | 3.101 | 3.090 | 2.314 | 0.151 | 0.512 | 0.114                                  |                                       |       |                                       |
|              |                         | 550   | 3.089 | 3.093 | 2.314 | 0.152 | 0.513 | 0.114                                  |                                       |       |                                       |
|              |                         | 560   | 3.087 | 3.096 | 2.314 | 0.154 | 0.513 | 0.114                                  |                                       |       |                                       |
|              |                         | 570   | 3.101 | 3.098 | 2.314 | 0.156 | 0.514 | 0.115                                  |                                       |       |                                       |
|              |                         | 580   | 3.117 | 3.101 | 2.314 | 0.158 | 0.515 | 0.115                                  |                                       |       |                                       |
|              |                         | 590   | 3.112 | 3.104 | 2.314 | 0.160 | 0.515 | 0.115                                  |                                       |       |                                       |
|              |                         | 600   | 3.107 | 3.106 | 2.314 | 0.161 | 0.516 | 0.115                                  |                                       |       |                                       |
| GFET<br>#S14 | $c^{(CEA)} = 2$<br>nM   | -50   | 2.295 | 2.284 | -     | -     | -     | -                                      | $\tilde{c}^{(CEA)} \approx 2.5514$ nM |       |                                       |
|              |                         | -40   | 2.302 | 2.284 |       |       |       |                                        |                                       |       |                                       |
|              |                         | -30   | 2.299 | 2.284 |       |       |       |                                        |                                       |       |                                       |
|              |                         | -20   | 2.302 | 2.284 |       |       |       |                                        |                                       |       |                                       |
|              |                         | -10   | 2.283 | 2.284 |       |       |       |                                        |                                       |       |                                       |
|              | 0                       | 2.277 | 2.284 | 2.284 | 0.000 | 0.000 | 0.000 | $\tilde{c}^{(AFP)} \approx 53.0123$ nM |                                       |       |                                       |
|              | 10                      | 2.342 | 2.331 | 2.284 | 0.003 | 0.037 | 0.007 |                                        |                                       |       |                                       |
|              | 20                      | 2.400 | 2.376 | 2.284 | 0.007 | 0.071 | 0.013 |                                        |                                       |       |                                       |
|              | 30                      | 2.428 | 2.417 | 2.284 | 0.010 | 0.104 | 0.019 |                                        |                                       |       |                                       |
|              | 40                      | 2.467 | 2.456 | 2.284 | 0.013 | 0.134 | 0.025 |                                        |                                       |       |                                       |
|              | 50                      | 2.509 | 2.493 | 2.284 | 0.017 | 0.163 | 0.029 |                                        |                                       |       |                                       |
|              | 60                      | 2.546 | 2.528 | 2.284 | 0.020 | 0.190 | 0.034 |                                        |                                       |       |                                       |
|              | $c^{(AFP)} = 100$<br>nM | 70    | 2.579 | 2.560 | 2.284 | 0.023 | 0.215 |                                        |                                       | 0.038 | $\tilde{c}^{(PTH)} \approx 6.7043$ nM |
|              |                         | 80    | 2.597 | 2.591 | 2.284 | 0.026 | 0.239 |                                        |                                       | 0.041 |                                       |
|              |                         | 90    | 2.639 | 2.620 | 2.284 | 0.029 | 0.262 |                                        |                                       | 0.045 |                                       |
|              |                         | 100   | 2.636 | 2.647 | 2.284 | 0.032 | 0.283 |                                        |                                       | 0.048 |                                       |
|              |                         | 110   | 2.664 | 2.673 | 2.284 | 0.035 | 0.303 |                                        |                                       | 0.051 |                                       |
|              |                         | 120   | 2.689 | 2.697 | 2.284 | 0.038 | 0.321 |                                        |                                       | 0.053 |                                       |
|              |                         | 130   | 2.730 | 2.720 | 2.284 | 0.041 | 0.339 |                                        |                                       | 0.056 |                                       |
|              |                         | 140   | 2.732 | 2.742 | 2.284 | 0.044 | 0.355 |                                        |                                       | 0.058 |                                       |
|              |                         | 150   | 2.771 | 2.762 | 2.284 | 0.047 | 0.371 |                                        |                                       | 0.060 |                                       |
|              |                         | 160   | 2.798 | 2.781 | 2.284 | 0.050 | 0.386 |                                        |                                       | 0.061 |                                       |
|              |                         | 170   | 2.817 | 2.799 | 2.284 | 0.053 | 0.399 |                                        |                                       | 0.063 |                                       |
| 180          |                         | 2.814 | 2.816 | 2.284 | 0.056 | 0.412 | 0.064 |                                        |                                       |       |                                       |
| 190          |                         | 2.824 | 2.833 | 2.284 | 0.058 | 0.424 | 0.066 |                                        |                                       |       |                                       |
| 200          | 2.845                   | 2.848 | 2.284 | 0.061 | 0.436 | 0.067 |       |                                        |                                       |       |                                       |

|              |                         |     |       |       |       |       |       |       |                                          |   |   |   |                                           |
|--------------|-------------------------|-----|-------|-------|-------|-------|-------|-------|------------------------------------------|---|---|---|-------------------------------------------|
|              |                         | 210 | 2.880 | 2.862 | 2.284 | 0.064 | 0.447 | 0.068 |                                          |   |   |   |                                           |
|              |                         | 220 | 2.897 | 2.876 | 2.284 | 0.066 | 0.457 | 0.069 |                                          |   |   |   |                                           |
|              |                         | 230 | 2.890 | 2.889 | 2.284 | 0.069 | 0.466 | 0.070 |                                          |   |   |   |                                           |
|              |                         | 240 | 2.904 | 2.902 | 2.284 | 0.072 | 0.475 | 0.071 |                                          |   |   |   |                                           |
|              |                         | 250 | 2.936 | 2.913 | 2.284 | 0.074 | 0.483 | 0.072 |                                          |   |   |   |                                           |
|              |                         | 260 | 2.918 | 2.924 | 2.284 | 0.077 | 0.491 | 0.072 |                                          |   |   |   |                                           |
|              |                         | 270 | 2.951 | 2.935 | 2.284 | 0.079 | 0.499 | 0.073 |                                          |   |   |   |                                           |
|              |                         | 280 | 2.943 | 2.945 | 2.284 | 0.082 | 0.506 | 0.073 |                                          |   |   |   |                                           |
|              |                         | 290 | 2.957 | 2.955 | 2.284 | 0.084 | 0.512 | 0.074 |                                          |   |   |   |                                           |
|              |                         | 300 | 2.971 | 2.964 | 2.284 | 0.086 | 0.519 | 0.074 |                                          |   |   |   |                                           |
|              |                         | 310 | 2.968 | 2.972 | 2.284 | 0.089 | 0.524 | 0.075 |                                          |   |   |   |                                           |
|              |                         | 320 | 2.999 | 2.980 | 2.284 | 0.091 | 0.530 | 0.075 |                                          |   |   |   |                                           |
|              |                         | 330 | 2.971 | 2.988 | 2.284 | 0.093 | 0.535 | 0.076 |                                          |   |   |   |                                           |
|              |                         | 340 | 3.012 | 2.996 | 2.284 | 0.096 | 0.540 | 0.076 |                                          |   |   |   |                                           |
|              |                         | 350 | 3.017 | 3.003 | 2.284 | 0.098 | 0.544 | 0.076 |                                          |   |   |   |                                           |
|              |                         | 360 | 3.022 | 3.010 | 2.284 | 0.100 | 0.549 | 0.077 |                                          |   |   |   |                                           |
|              |                         | 370 | 2.993 | 3.016 | 2.284 | 0.102 | 0.553 | 0.077 |                                          |   |   |   |                                           |
|              |                         | 380 | 3.017 | 3.022 | 2.284 | 0.105 | 0.556 | 0.077 |                                          |   |   |   |                                           |
|              |                         | 390 | 3.030 | 3.028 | 2.284 | 0.107 | 0.560 | 0.077 |                                          |   |   |   |                                           |
|              |                         | 400 | 3.047 | 3.034 | 2.284 | 0.109 | 0.563 | 0.077 |                                          |   |   |   |                                           |
|              |                         | 410 | 3.049 | 3.039 | 2.284 | 0.111 | 0.566 | 0.078 |                                          |   |   |   |                                           |
|              |                         | 420 | 3.037 | 3.044 | 2.284 | 0.113 | 0.569 | 0.078 |                                          |   |   |   |                                           |
|              |                         | 430 | 3.062 | 3.049 | 2.284 | 0.115 | 0.572 | 0.078 |                                          |   |   |   |                                           |
|              |                         | 440 | 3.063 | 3.054 | 2.284 | 0.117 | 0.575 | 0.078 |                                          |   |   |   |                                           |
|              |                         | 450 | 3.066 | 3.059 | 2.284 | 0.119 | 0.577 | 0.078 |                                          |   |   |   |                                           |
|              |                         | 460 | 3.067 | 3.063 | 2.284 | 0.121 | 0.579 | 0.078 |                                          |   |   |   |                                           |
|              |                         | 470 | 3.067 | 3.067 | 2.284 | 0.123 | 0.582 | 0.078 |                                          |   |   |   |                                           |
|              |                         | 480 | 3.058 | 3.071 | 2.284 | 0.125 | 0.584 | 0.079 |                                          |   |   |   |                                           |
|              |                         | 490 | 3.106 | 3.075 | 2.284 | 0.127 | 0.586 | 0.079 |                                          |   |   |   |                                           |
|              |                         | 500 | 3.071 | 3.079 | 2.284 | 0.129 | 0.587 | 0.079 |                                          |   |   |   |                                           |
|              |                         | 510 | 3.119 | 3.083 | 2.284 | 0.131 | 0.589 | 0.079 |                                          |   |   |   |                                           |
|              |                         | 520 | 3.106 | 3.086 | 2.284 | 0.132 | 0.591 | 0.079 |                                          |   |   |   |                                           |
|              |                         | 530 | 3.103 | 3.090 | 2.284 | 0.134 | 0.592 | 0.079 |                                          |   |   |   |                                           |
|              |                         | 540 | 3.110 | 3.093 | 2.284 | 0.136 | 0.594 | 0.079 |                                          |   |   |   |                                           |
|              |                         | 550 | 3.086 | 3.096 | 2.284 | 0.138 | 0.595 | 0.079 |                                          |   |   |   |                                           |
|              |                         | 560 | 3.123 | 3.099 | 2.284 | 0.140 | 0.596 | 0.079 |                                          |   |   |   |                                           |
|              |                         | 570 | 3.129 | 3.102 | 2.284 | 0.141 | 0.597 | 0.079 |                                          |   |   |   |                                           |
|              |                         | 580 | 3.098 | 3.105 | 2.284 | 0.143 | 0.598 | 0.079 |                                          |   |   |   |                                           |
|              |                         | 590 | 3.106 | 3.108 | 2.284 | 0.145 | 0.600 | 0.079 |                                          |   |   |   |                                           |
|              |                         | 600 | 3.118 | 3.110 | 2.284 | 0.146 | 0.600 | 0.079 |                                          |   |   |   |                                           |
| GFET<br>#S15 | $c^{(CEA)} = 2$<br>nM   | -50 | 2.330 | 2.307 | -     | -     | -     | -     | $\tilde{c}^{(CEA)} \approx$<br>2.3187 nM |   |   |   |                                           |
|              |                         | -40 | 2.310 | 2.307 |       |       |       |       |                                          |   |   |   |                                           |
|              | $c^{(AFP)} =$<br>100 nM | -30 | 2.313 | 2.307 |       |       |       |       | -                                        | - | - | - | $\tilde{c}^{(AFP)} \approx$<br>58.1712 nM |
|              |                         | -20 | 2.289 | 2.307 |       |       |       |       |                                          |   |   |   |                                           |
|              |                         | -10 | 2.309 | 2.307 |       |       |       |       |                                          |   |   |   |                                           |
|              | $c^{(PTH)} = 20$<br>nM  | 0   | 2.294 | 2.307 |       |       |       |       |                                          |   |   |   | 2.307                                     |

|  |  |     |       |       |       |       |       |       |            |
|--|--|-----|-------|-------|-------|-------|-------|-------|------------|
|  |  | 10  | 2.379 | 2.390 | 2.307 | 0.003 | 0.035 | 0.046 | 34.8122 nM |
|  |  | 20  | 2.473 | 2.457 | 2.307 | 0.006 | 0.068 | 0.077 |            |
|  |  | 30  | 2.498 | 2.512 | 2.307 | 0.009 | 0.098 | 0.098 |            |
|  |  | 40  | 2.566 | 2.559 | 2.307 | 0.012 | 0.127 | 0.113 |            |
|  |  | 50  | 2.611 | 2.598 | 2.307 | 0.015 | 0.154 | 0.123 |            |
|  |  | 60  | 2.639 | 2.633 | 2.307 | 0.018 | 0.179 | 0.130 |            |
|  |  | 70  | 2.683 | 2.664 | 2.307 | 0.021 | 0.202 | 0.134 |            |
|  |  | 80  | 2.689 | 2.692 | 2.307 | 0.023 | 0.224 | 0.137 |            |
|  |  | 90  | 2.739 | 2.718 | 2.307 | 0.026 | 0.245 | 0.140 |            |
|  |  | 100 | 2.763 | 2.741 | 2.307 | 0.029 | 0.264 | 0.141 |            |
|  |  | 110 | 2.771 | 2.763 | 2.307 | 0.032 | 0.282 | 0.142 |            |
|  |  | 120 | 2.786 | 2.783 | 2.307 | 0.034 | 0.299 | 0.143 |            |
|  |  | 130 | 2.833 | 2.802 | 2.307 | 0.037 | 0.315 | 0.143 |            |
|  |  | 140 | 2.810 | 2.819 | 2.307 | 0.039 | 0.329 | 0.144 |            |
|  |  | 150 | 2.830 | 2.836 | 2.307 | 0.042 | 0.343 | 0.144 |            |
|  |  | 160 | 2.828 | 2.852 | 2.307 | 0.045 | 0.356 | 0.144 |            |
|  |  | 170 | 2.861 | 2.866 | 2.307 | 0.047 | 0.368 | 0.144 |            |
|  |  | 180 | 2.886 | 2.880 | 2.307 | 0.050 | 0.379 | 0.144 |            |
|  |  | 190 | 2.891 | 2.893 | 2.307 | 0.052 | 0.390 | 0.144 |            |
|  |  | 200 | 2.899 | 2.906 | 2.307 | 0.055 | 0.400 | 0.144 |            |
|  |  | 210 | 2.943 | 2.917 | 2.307 | 0.057 | 0.409 | 0.144 |            |
|  |  | 220 | 2.933 | 2.928 | 2.307 | 0.059 | 0.418 | 0.144 |            |
|  |  | 230 | 2.954 | 2.939 | 2.307 | 0.062 | 0.426 | 0.144 |            |
|  |  | 240 | 2.952 | 2.949 | 2.307 | 0.064 | 0.433 | 0.144 |            |
|  |  | 250 | 2.958 | 2.958 | 2.307 | 0.066 | 0.440 | 0.144 |            |
|  |  | 260 | 2.991 | 2.967 | 2.307 | 0.069 | 0.447 | 0.144 |            |
|  |  | 270 | 2.986 | 2.975 | 2.307 | 0.071 | 0.453 | 0.144 |            |
|  |  | 280 | 2.984 | 2.983 | 2.307 | 0.073 | 0.459 | 0.144 |            |
|  |  | 290 | 2.975 | 2.991 | 2.307 | 0.075 | 0.464 | 0.144 |            |
|  |  | 300 | 2.993 | 2.998 | 2.307 | 0.078 | 0.470 | 0.144 |            |
|  |  | 310 | 3.007 | 3.005 | 2.307 | 0.080 | 0.474 | 0.144 |            |
|  |  | 320 | 3.003 | 3.012 | 2.307 | 0.082 | 0.479 | 0.144 |            |
|  |  | 330 | 3.026 | 3.018 | 2.307 | 0.084 | 0.483 | 0.144 |            |
|  |  | 340 | 3.026 | 3.024 | 2.307 | 0.086 | 0.487 | 0.144 |            |
|  |  | 350 | 3.055 | 3.030 | 2.307 | 0.088 | 0.490 | 0.144 |            |
|  |  | 360 | 3.023 | 3.035 | 2.307 | 0.090 | 0.494 | 0.144 |            |
|  |  | 370 | 3.061 | 3.040 | 2.307 | 0.092 | 0.497 | 0.144 |            |
|  |  | 380 | 3.065 | 3.045 | 2.307 | 0.094 | 0.500 | 0.144 |            |
|  |  | 390 | 3.070 | 3.050 | 2.307 | 0.096 | 0.503 | 0.144 |            |
|  |  | 400 | 3.043 | 3.055 | 2.307 | 0.098 | 0.505 | 0.144 |            |
|  |  | 410 | 3.074 | 3.059 | 2.307 | 0.100 | 0.508 | 0.144 |            |
|  |  | 420 | 3.036 | 3.063 | 2.307 | 0.102 | 0.510 | 0.144 |            |
|  |  | 430 | 3.053 | 3.067 | 2.307 | 0.104 | 0.512 | 0.144 |            |
|  |  | 440 | 3.083 | 3.071 | 2.307 | 0.106 | 0.514 | 0.144 |            |
|  |  | 450 | 3.076 | 3.075 | 2.307 | 0.107 | 0.516 | 0.144 |            |
|  |  | 460 | 3.086 | 3.078 | 2.307 | 0.109 | 0.518 | 0.144 |            |

|              |                       |       |       |       |       |       |       |                                        |                                       |
|--------------|-----------------------|-------|-------|-------|-------|-------|-------|----------------------------------------|---------------------------------------|
|              |                       | 470   | 3.103 | 3.082 | 2.307 | 0.111 | 0.519 | 0.144                                  |                                       |
|              |                       | 480   | 3.083 | 3.085 | 2.307 | 0.113 | 0.521 | 0.144                                  |                                       |
|              |                       | 490   | 3.090 | 3.088 | 2.307 | 0.115 | 0.522 | 0.144                                  |                                       |
|              |                       | 500   | 3.104 | 3.091 | 2.307 | 0.116 | 0.524 | 0.144                                  |                                       |
|              |                       | 510   | 3.107 | 3.094 | 2.307 | 0.118 | 0.525 | 0.144                                  |                                       |
|              |                       | 520   | 3.109 | 3.097 | 2.307 | 0.120 | 0.526 | 0.144                                  |                                       |
|              |                       | 530   | 3.108 | 3.100 | 2.307 | 0.121 | 0.527 | 0.144                                  |                                       |
|              |                       | 540   | 3.107 | 3.103 | 2.307 | 0.123 | 0.528 | 0.144                                  |                                       |
|              |                       | 550   | 3.112 | 3.105 | 2.307 | 0.125 | 0.529 | 0.144                                  |                                       |
|              |                       | 560   | 3.129 | 3.108 | 2.307 | 0.126 | 0.530 | 0.144                                  |                                       |
|              |                       | 570   | 3.127 | 3.110 | 2.307 | 0.128 | 0.531 | 0.144                                  |                                       |
|              |                       | 580   | 3.139 | 3.113 | 2.307 | 0.130 | 0.532 | 0.144                                  |                                       |
|              |                       | 590   | 3.143 | 3.115 | 2.307 | 0.131 | 0.532 | 0.144                                  |                                       |
|              |                       | 600   | 3.130 | 3.117 | 2.307 | 0.133 | 0.533 | 0.144                                  |                                       |
| GFET<br>#S16 | $c^{(CEA)} = 2$<br>nM | -50   | 2.322 | 2.301 | -     | -     | -     | -                                      | $\tilde{c}^{(CEA)} \approx 2.4532$ nM |
|              |                       | -40   | 2.322 | 2.301 |       |       |       |                                        |                                       |
|              |                       | -30   | 2.302 | 2.301 |       |       |       |                                        |                                       |
|              |                       | -20   | 2.312 | 2.301 |       |       |       |                                        |                                       |
|              |                       | -10   | 2.301 | 2.301 |       |       |       |                                        |                                       |
|              | 0                     | 2.294 | 2.301 | 2.301 | 0.000 | 0.000 | 0.000 |                                        |                                       |
|              | 10                    | 2.416 | 2.403 | 2.301 | 0.003 | 0.034 | 0.065 |                                        |                                       |
|              | 20                    | 2.457 | 2.463 | 2.301 | 0.006 | 0.066 | 0.089 |                                        |                                       |
|              | 30                    | 2.513 | 2.505 | 2.301 | 0.009 | 0.097 | 0.098 |                                        |                                       |
|              | 40                    | 2.526 | 2.540 | 2.301 | 0.012 | 0.125 | 0.101 |                                        |                                       |
|              | 50                    | 2.565 | 2.571 | 2.301 | 0.015 | 0.152 | 0.103 |                                        |                                       |
|              | 60                    | 2.594 | 2.599 | 2.301 | 0.018 | 0.177 | 0.103 |                                        |                                       |
|              | 70                    | 2.626 | 2.625 | 2.301 | 0.020 | 0.200 | 0.103 |                                        |                                       |
|              | 80                    | 2.663 | 2.650 | 2.301 | 0.023 | 0.222 | 0.103 |                                        |                                       |
|              | 90                    | 2.660 | 2.674 | 2.301 | 0.026 | 0.243 | 0.103 |                                        |                                       |
|              | 100                   | 2.697 | 2.696 | 2.301 | 0.029 | 0.263 | 0.104 | $\tilde{c}^{(AFP)} \approx 54.0981$ nM |                                       |
|              | 110                   | 2.738 | 2.717 | 2.301 | 0.031 | 0.281 | 0.104 |                                        |                                       |
|              | 120                   | 2.722 | 2.737 | 2.301 | 0.034 | 0.298 | 0.104 | $\tilde{c}^{(PTH)} \approx 93.5644$ nM |                                       |
|              | 130                   | 2.773 | 2.756 | 2.301 | 0.037 | 0.314 | 0.104 |                                        |                                       |
|              | 140                   | 2.770 | 2.774 | 2.301 | 0.039 | 0.330 | 0.104 |                                        |                                       |
|              | 150                   | 2.790 | 2.791 | 2.301 | 0.042 | 0.344 | 0.104 |                                        |                                       |
|              | 160                   | 2.805 | 2.806 | 2.301 | 0.044 | 0.357 | 0.104 |                                        |                                       |
|              | 170                   | 2.808 | 2.822 | 2.301 | 0.047 | 0.370 | 0.104 |                                        |                                       |
|              | 180                   | 2.843 | 2.836 | 2.301 | 0.049 | 0.382 | 0.104 |                                        |                                       |
|              | 190                   | 2.870 | 2.849 | 2.301 | 0.052 | 0.393 | 0.104 |                                        |                                       |
|              | 200                   | 2.862 | 2.862 | 2.301 | 0.054 | 0.403 | 0.104 |                                        |                                       |
| 210          | 2.893                 | 2.874 | 2.301 | 0.057 | 0.413 | 0.104 |       |                                        |                                       |
| 220          | 2.917                 | 2.886 | 2.301 | 0.059 | 0.422 | 0.104 |       |                                        |                                       |
| 230          | 2.929                 | 2.897 | 2.301 | 0.061 | 0.431 | 0.104 |       |                                        |                                       |
| 240          | 2.928                 | 2.907 | 2.301 | 0.064 | 0.439 | 0.104 |       |                                        |                                       |
| 250          | 2.943                 | 2.917 | 2.301 | 0.066 | 0.447 | 0.104 |       |                                        |                                       |
| 260          | 2.946                 | 2.927 | 2.301 | 0.068 | 0.454 | 0.104 |       |                                        |                                       |



|              |                       |     |       |       |       |       |       |       |                                       |
|--------------|-----------------------|-----|-------|-------|-------|-------|-------|-------|---------------------------------------|
|              |                       | 270 | 2.938 | 2.936 | 2.301 | 0.070 | 0.461 | 0.104 |                                       |
|              |                       | 280 | 2.938 | 2.944 | 2.301 | 0.073 | 0.467 | 0.104 |                                       |
|              |                       | 290 | 2.996 | 2.952 | 2.301 | 0.075 | 0.473 | 0.104 |                                       |
|              |                       | 300 | 2.983 | 2.960 | 2.301 | 0.077 | 0.478 | 0.104 |                                       |
|              |                       | 310 | 2.987 | 2.968 | 2.301 | 0.079 | 0.484 | 0.104 |                                       |
|              |                       | 320 | 2.998 | 2.975 | 2.301 | 0.081 | 0.489 | 0.104 |                                       |
|              |                       | 330 | 2.995 | 2.981 | 2.301 | 0.083 | 0.493 | 0.104 |                                       |
|              |                       | 340 | 3.011 | 2.988 | 2.301 | 0.085 | 0.498 | 0.104 |                                       |
|              |                       | 350 | 2.969 | 2.994 | 2.301 | 0.087 | 0.502 | 0.104 |                                       |
|              |                       | 360 | 2.998 | 3.000 | 2.301 | 0.089 | 0.505 | 0.104 |                                       |
|              |                       | 370 | 3.024 | 3.005 | 2.301 | 0.091 | 0.509 | 0.104 |                                       |
|              |                       | 380 | 3.019 | 3.011 | 2.301 | 0.093 | 0.512 | 0.104 |                                       |
|              |                       | 390 | 3.017 | 3.016 | 2.301 | 0.095 | 0.516 | 0.104 |                                       |
|              |                       | 400 | 3.041 | 3.021 | 2.301 | 0.097 | 0.519 | 0.104 |                                       |
|              |                       | 410 | 3.024 | 3.025 | 2.301 | 0.099 | 0.521 | 0.104 |                                       |
|              |                       | 420 | 3.030 | 3.030 | 2.301 | 0.101 | 0.524 | 0.104 |                                       |
|              |                       | 430 | 3.034 | 3.034 | 2.301 | 0.103 | 0.527 | 0.104 |                                       |
|              |                       | 440 | 3.027 | 3.038 | 2.301 | 0.105 | 0.529 | 0.104 |                                       |
|              |                       | 450 | 3.050 | 3.042 | 2.301 | 0.106 | 0.531 | 0.104 |                                       |
|              |                       | 460 | 3.037 | 3.046 | 2.301 | 0.108 | 0.533 | 0.104 |                                       |
|              |                       | 470 | 3.048 | 3.050 | 2.301 | 0.110 | 0.535 | 0.104 |                                       |
|              |                       | 480 | 3.074 | 3.053 | 2.301 | 0.112 | 0.537 | 0.104 |                                       |
|              |                       | 490 | 3.047 | 3.057 | 2.301 | 0.113 | 0.539 | 0.104 |                                       |
|              |                       | 500 | 3.066 | 3.060 | 2.301 | 0.115 | 0.540 | 0.104 |                                       |
|              |                       | 510 | 3.078 | 3.063 | 2.301 | 0.117 | 0.542 | 0.104 |                                       |
|              |                       | 520 | 3.068 | 3.066 | 2.301 | 0.118 | 0.543 | 0.104 |                                       |
|              |                       | 530 | 3.067 | 3.069 | 2.301 | 0.120 | 0.544 | 0.104 |                                       |
|              |                       | 540 | 3.070 | 3.072 | 2.301 | 0.122 | 0.546 | 0.104 |                                       |
|              |                       | 550 | 3.065 | 3.075 | 2.301 | 0.123 | 0.547 | 0.104 |                                       |
|              |                       | 560 | 3.070 | 3.077 | 2.301 | 0.125 | 0.548 | 0.104 |                                       |
|              |                       | 570 | 3.056 | 3.080 | 2.301 | 0.126 | 0.549 | 0.104 |                                       |
|              |                       | 580 | 3.087 | 3.083 | 2.301 | 0.128 | 0.550 | 0.104 |                                       |
|              |                       | 590 | 3.100 | 3.085 | 2.301 | 0.129 | 0.551 | 0.104 |                                       |
|              |                       | 600 | 3.110 | 3.087 | 2.301 | 0.131 | 0.552 | 0.104 |                                       |
| GFET<br>#S17 | $c^{(CEA)} = 5$<br>nM | -50 | 2.334 | 2.325 | -     | -     | -     | -     | $\tilde{c}^{(CEA)} \approx 5.1873$ nM |
|              |                       | -40 | 2.331 | 2.325 |       |       |       |       |                                       |
|              |                       | -30 | 2.331 | 2.325 |       |       |       |       |                                       |
|              |                       | -20 | 2.330 | 2.325 |       |       |       |       |                                       |
|              |                       | -10 | 2.324 | 2.325 |       |       |       |       |                                       |
|              | $c^{(AFP)} = 5$<br>nM | 0   | 2.332 | 2.325 | 2.325 | 0.000 | 0.000 | 0.000 | $\tilde{c}^{(AFP)} \approx 6.6043$ nM |
|              |                       | 10  | 2.390 | 2.350 | 2.325 | 0.008 | 0.005 | 0.011 |                                       |
|              |                       | 20  | 2.368 | 2.373 | 2.325 | 0.017 | 0.010 | 0.021 |                                       |
|              | $c^{(PTH)} = 2$<br>nM | 30  | 2.400 | 2.396 | 2.325 | 0.025 | 0.015 | 0.031 | $\tilde{c}^{(PTH)} \approx 5.2176$ nM |
|              |                       | 40  | 2.447 | 2.418 | 2.325 | 0.033 | 0.020 | 0.040 |                                       |
|              |                       | 50  | 2.444 | 2.439 | 2.325 | 0.041 | 0.025 | 0.048 |                                       |
|              |                       | 60  | 2.454 | 2.458 | 2.325 | 0.048 | 0.030 | 0.056 |                                       |

|     |       |       |       |       |       |       |
|-----|-------|-------|-------|-------|-------|-------|
| 70  | 2.500 | 2.478 | 2.325 | 0.056 | 0.034 | 0.063 |
| 80  | 2.507 | 2.496 | 2.325 | 0.063 | 0.039 | 0.069 |
| 90  | 2.548 | 2.514 | 2.325 | 0.070 | 0.044 | 0.075 |
| 100 | 2.520 | 2.531 | 2.325 | 0.077 | 0.048 | 0.081 |
| 110 | 2.557 | 2.547 | 2.325 | 0.084 | 0.052 | 0.086 |
| 120 | 2.560 | 2.563 | 2.325 | 0.091 | 0.057 | 0.091 |
| 130 | 2.611 | 2.578 | 2.325 | 0.097 | 0.061 | 0.095 |
| 140 | 2.637 | 2.593 | 2.325 | 0.104 | 0.065 | 0.099 |
| 150 | 2.633 | 2.607 | 2.325 | 0.110 | 0.069 | 0.103 |
| 160 | 2.625 | 2.621 | 2.325 | 0.116 | 0.073 | 0.107 |
| 170 | 2.631 | 2.634 | 2.325 | 0.122 | 0.078 | 0.110 |
| 180 | 2.646 | 2.647 | 2.325 | 0.128 | 0.081 | 0.113 |
| 190 | 2.678 | 2.660 | 2.325 | 0.134 | 0.085 | 0.116 |
| 200 | 2.714 | 2.672 | 2.325 | 0.139 | 0.089 | 0.118 |
| 210 | 2.688 | 2.683 | 2.325 | 0.145 | 0.093 | 0.121 |
| 220 | 2.694 | 2.695 | 2.325 | 0.150 | 0.097 | 0.123 |
| 230 | 2.721 | 2.706 | 2.325 | 0.156 | 0.100 | 0.125 |
| 240 | 2.726 | 2.716 | 2.325 | 0.161 | 0.104 | 0.127 |
| 250 | 2.739 | 2.727 | 2.325 | 0.166 | 0.108 | 0.128 |
| 260 | 2.779 | 2.737 | 2.325 | 0.171 | 0.111 | 0.130 |
| 270 | 2.728 | 2.747 | 2.325 | 0.176 | 0.115 | 0.132 |
| 280 | 2.768 | 2.756 | 2.325 | 0.180 | 0.118 | 0.133 |
| 290 | 2.774 | 2.765 | 2.325 | 0.185 | 0.121 | 0.134 |
| 300 | 2.788 | 2.774 | 2.325 | 0.190 | 0.125 | 0.135 |
| 310 | 2.786 | 2.783 | 2.325 | 0.194 | 0.128 | 0.137 |
| 320 | 2.805 | 2.792 | 2.325 | 0.198 | 0.131 | 0.138 |
| 330 | 2.810 | 2.800 | 2.325 | 0.203 | 0.134 | 0.138 |
| 340 | 2.835 | 2.808 | 2.325 | 0.207 | 0.137 | 0.139 |
| 350 | 2.818 | 2.816 | 2.325 | 0.211 | 0.140 | 0.140 |
| 360 | 2.838 | 2.824 | 2.325 | 0.215 | 0.143 | 0.141 |
| 370 | 2.822 | 2.832 | 2.325 | 0.219 | 0.146 | 0.142 |
| 380 | 2.849 | 2.839 | 2.325 | 0.223 | 0.149 | 0.142 |
| 390 | 2.830 | 2.846 | 2.325 | 0.226 | 0.152 | 0.143 |
| 400 | 2.850 | 2.853 | 2.325 | 0.230 | 0.155 | 0.143 |
| 410 | 2.871 | 2.860 | 2.325 | 0.234 | 0.158 | 0.144 |
| 420 | 2.881 | 2.867 | 2.325 | 0.237 | 0.160 | 0.144 |
| 430 | 2.879 | 2.873 | 2.325 | 0.241 | 0.163 | 0.145 |
| 440 | 2.875 | 2.880 | 2.325 | 0.244 | 0.166 | 0.145 |
| 450 | 2.899 | 2.886 | 2.325 | 0.247 | 0.168 | 0.146 |
| 460 | 2.907 | 2.892 | 2.325 | 0.250 | 0.171 | 0.146 |
| 470 | 2.915 | 2.898 | 2.325 | 0.254 | 0.174 | 0.146 |
| 480 | 2.922 | 2.904 | 2.325 | 0.257 | 0.176 | 0.147 |
| 490 | 2.929 | 2.910 | 2.325 | 0.260 | 0.179 | 0.147 |
| 500 | 2.913 | 2.915 | 2.325 | 0.263 | 0.181 | 0.147 |
| 510 | 2.926 | 2.921 | 2.325 | 0.265 | 0.183 | 0.147 |
| 520 | 2.938 | 2.926 | 2.325 | 0.268 | 0.186 | 0.148 |

|              |                       |       |       |       |       |       |       |                                           |                                          |
|--------------|-----------------------|-------|-------|-------|-------|-------|-------|-------------------------------------------|------------------------------------------|
|              |                       | 530   | 2.964 | 2.932 | 2.325 | 0.271 | 0.188 | 0.148                                     |                                          |
|              |                       | 540   | 2.948 | 2.937 | 2.325 | 0.274 | 0.190 | 0.148                                     |                                          |
|              |                       | 550   | 2.957 | 2.942 | 2.325 | 0.276 | 0.193 | 0.148                                     |                                          |
|              |                       | 560   | 2.961 | 2.947 | 2.325 | 0.279 | 0.195 | 0.148                                     |                                          |
|              |                       | 570   | 2.971 | 2.952 | 2.325 | 0.282 | 0.197 | 0.148                                     |                                          |
|              |                       | 580   | 2.974 | 2.956 | 2.325 | 0.284 | 0.199 | 0.149                                     |                                          |
|              |                       | 590   | 2.958 | 2.961 | 2.325 | 0.286 | 0.201 | 0.149                                     |                                          |
|              |                       | 600   | 2.966 | 2.966 | 2.325 | 0.289 | 0.203 | 0.149                                     |                                          |
| GFET<br>#S18 | $c^{(CEA)} = 5$<br>nM | -50   | 2.295 | 2.293 | -     | -     | -     | -                                         | $\tilde{c}^{(CEA)} \approx$<br>4.7023 nM |
|              |                       | -40   | 2.306 | 2.293 |       |       |       |                                           |                                          |
|              |                       | -30   | 2.314 | 2.293 |       |       |       |                                           |                                          |
|              |                       | -20   | 2.281 | 2.293 |       |       |       |                                           |                                          |
|              |                       | -10   | 2.283 | 2.293 |       |       |       |                                           |                                          |
|              |                       | 0     | 2.307 | 2.293 | 2.293 | 0.000 | 0.000 | 0.000                                     |                                          |
|              |                       | 10    | 2.334 | 2.339 | 2.293 | 0.008 | 0.005 | 0.032                                     |                                          |
|              |                       | 20    | 2.386 | 2.378 | 2.293 | 0.016 | 0.009 | 0.059                                     |                                          |
|              |                       | 30    | 2.436 | 2.413 | 2.293 | 0.024 | 0.014 | 0.081                                     |                                          |
|              |                       | 40    | 2.486 | 2.444 | 2.293 | 0.032 | 0.019 | 0.100                                     |                                          |
|              |                       | 50    | 2.482 | 2.472 | 2.293 | 0.040 | 0.023 | 0.116                                     |                                          |
|              |                       | 60    | 2.520 | 2.497 | 2.293 | 0.047 | 0.028 | 0.129                                     |                                          |
|              |                       | 70    | 2.552 | 2.520 | 2.293 | 0.055 | 0.032 | 0.140                                     |                                          |
|              |                       | 80    | 2.547 | 2.540 | 2.293 | 0.062 | 0.036 | 0.149                                     |                                          |
|              |                       | 90    | 2.566 | 2.559 | 2.293 | 0.069 | 0.040 | 0.156                                     |                                          |
|              |                       | 100   | 2.588 | 2.576 | 2.293 | 0.076 | 0.045 | 0.162                                     |                                          |
|              |                       | 110   | 2.596 | 2.592 | 2.293 | 0.083 | 0.049 | 0.168                                     |                                          |
|              |                       | 120   | 2.611 | 2.608 | 2.293 | 0.089 | 0.053 | 0.172                                     |                                          |
|              |                       | 130   | 2.648 | 2.622 | 2.293 | 0.096 | 0.057 | 0.176                                     |                                          |
|              |                       | 140   | 2.670 | 2.635 | 2.293 | 0.102 | 0.061 | 0.179                                     |                                          |
|              |                       | 150   | 2.661 | 2.648 | 2.293 | 0.109 | 0.065 | 0.181                                     |                                          |
|              |                       | 160   | 2.678 | 2.660 | 2.293 | 0.115 | 0.068 | 0.183                                     |                                          |
|              |                       | 170   | 2.698 | 2.671 | 2.293 | 0.121 | 0.072 | 0.185                                     |                                          |
|              |                       | 180   | 2.706 | 2.683 | 2.293 | 0.127 | 0.076 | 0.187                                     |                                          |
|              |                       | 190   | 2.697 | 2.693 | 2.293 | 0.132 | 0.079 | 0.188                                     |                                          |
|              |                       | 200   | 2.694 | 2.704 | 2.293 | 0.138 | 0.083 | 0.189                                     |                                          |
|              |                       | 210   | 2.713 | 2.713 | 2.293 | 0.144 | 0.087 | 0.190                                     |                                          |
|              |                       | 220   | 2.726 | 2.723 | 2.293 | 0.149 | 0.090 | 0.190                                     |                                          |
|              |                       | 230   | 2.726 | 2.733 | 2.293 | 0.155 | 0.094 | 0.191                                     |                                          |
|              |                       | 240   | 2.739 | 2.742 | 2.293 | 0.160 | 0.097 | 0.192                                     |                                          |
|              |                       | 250   | 2.750 | 2.751 | 2.293 | 0.165 | 0.100 | 0.192                                     |                                          |
|              |                       | 260   | 2.777 | 2.759 | 2.293 | 0.170 | 0.104 | 0.192                                     |                                          |
| 270          | 2.775                 | 2.768 | 2.293 | 0.175 | 0.107 | 0.193 |       |                                           |                                          |
| 280          | 2.784                 | 2.776 | 2.293 | 0.180 | 0.110 | 0.193 |       |                                           |                                          |
| 290          | 2.782                 | 2.784 | 2.293 | 0.185 | 0.113 | 0.193 |       |                                           |                                          |
| 300          | 2.821                 | 2.792 | 2.293 | 0.189 | 0.116 | 0.193 |       |                                           |                                          |
| 310          | 2.796                 | 2.800 | 2.293 | 0.194 | 0.119 | 0.193 |       |                                           |                                          |
| 320          | 2.828                 | 2.807 | 2.293 | 0.198 | 0.122 | 0.193 |       |                                           |                                          |
|              | $c^{(AFP)} = 5$<br>nM |       |       |       |       |       |       | $\tilde{c}^{(AFP)} \approx$<br>5.9876 nM  |                                          |
|              | $c^{(PTH)} = 5$<br>nM |       |       |       |       |       |       | $\tilde{c}^{(PTH)} \approx$<br>15.4409 nM |                                          |

|              |                        |       |       |       |       |       |       |       |                                       |                                        |
|--------------|------------------------|-------|-------|-------|-------|-------|-------|-------|---------------------------------------|----------------------------------------|
|              |                        | 330   | 2.817 | 2.815 | 2.293 | 0.203 | 0.125 | 0.194 |                                       |                                        |
|              |                        | 340   | 2.817 | 2.822 | 2.293 | 0.207 | 0.128 | 0.194 |                                       |                                        |
|              |                        | 350   | 2.824 | 2.829 | 2.293 | 0.211 | 0.131 | 0.194 |                                       |                                        |
|              |                        | 360   | 2.855 | 2.836 | 2.293 | 0.215 | 0.134 | 0.194 |                                       |                                        |
|              |                        | 370   | 2.831 | 2.843 | 2.293 | 0.219 | 0.137 | 0.194 |                                       |                                        |
|              |                        | 380   | 2.840 | 2.850 | 2.293 | 0.223 | 0.140 | 0.194 |                                       |                                        |
|              |                        | 390   | 2.862 | 2.857 | 2.293 | 0.227 | 0.142 | 0.194 |                                       |                                        |
|              |                        | 400   | 2.857 | 2.863 | 2.293 | 0.231 | 0.145 | 0.194 |                                       |                                        |
|              |                        | 410   | 2.887 | 2.870 | 2.293 | 0.235 | 0.148 | 0.194 |                                       |                                        |
|              |                        | 420   | 2.879 | 2.876 | 2.293 | 0.238 | 0.150 | 0.194 |                                       |                                        |
|              |                        | 430   | 2.880 | 2.882 | 2.293 | 0.242 | 0.153 | 0.194 |                                       |                                        |
|              |                        | 440   | 2.892 | 2.888 | 2.293 | 0.246 | 0.155 | 0.194 |                                       |                                        |
|              |                        | 450   | 2.918 | 2.894 | 2.293 | 0.249 | 0.158 | 0.194 |                                       |                                        |
|              |                        | 460   | 2.902 | 2.900 | 2.293 | 0.252 | 0.160 | 0.194 |                                       |                                        |
|              |                        | 470   | 2.896 | 2.906 | 2.293 | 0.256 | 0.163 | 0.194 |                                       |                                        |
|              |                        | 480   | 2.911 | 2.911 | 2.293 | 0.259 | 0.165 | 0.194 |                                       |                                        |
|              |                        | 490   | 2.927 | 2.917 | 2.293 | 0.262 | 0.167 | 0.194 |                                       |                                        |
|              |                        | 500   | 2.942 | 2.922 | 2.293 | 0.265 | 0.170 | 0.194 |                                       |                                        |
|              |                        | 510   | 2.930 | 2.928 | 2.293 | 0.268 | 0.172 | 0.194 |                                       |                                        |
|              |                        | 520   | 2.928 | 2.933 | 2.293 | 0.271 | 0.174 | 0.194 |                                       |                                        |
|              |                        | 530   | 2.987 | 2.938 | 2.293 | 0.274 | 0.176 | 0.194 |                                       |                                        |
|              |                        | 540   | 2.947 | 2.943 | 2.293 | 0.277 | 0.179 | 0.194 |                                       |                                        |
|              |                        | 550   | 2.962 | 2.948 | 2.293 | 0.280 | 0.181 | 0.194 |                                       |                                        |
|              |                        | 560   | 2.935 | 2.953 | 2.293 | 0.283 | 0.183 | 0.194 |                                       |                                        |
|              |                        | 570   | 2.956 | 2.958 | 2.293 | 0.286 | 0.185 | 0.194 |                                       |                                        |
|              |                        | 580   | 2.958 | 2.963 | 2.293 | 0.288 | 0.187 | 0.194 |                                       |                                        |
|              |                        | 590   | 2.969 | 2.967 | 2.293 | 0.291 | 0.189 | 0.194 |                                       |                                        |
|              |                        | 600   | 2.959 | 2.972 | 2.293 | 0.294 | 0.191 | 0.194 |                                       |                                        |
| GFET<br>#S19 | $c^{(CEA)} = 5$<br>nM  | -50   | 2.347 | 2.331 | -     | -     | -     | -     | $\tilde{c}^{(CEA)} \approx 4.4876$ nM |                                        |
|              |                        | -40   | 2.335 | 2.331 |       |       |       |       |                                       |                                        |
|              |                        | -30   | 2.351 | 2.331 |       |       |       |       |                                       |                                        |
|              |                        | -20   | 2.339 | 2.331 |       |       |       |       |                                       |                                        |
|              |                        | -10   | 2.335 | 2.331 |       |       |       |       |                                       |                                        |
|              | 0                      | 2.358 | 2.331 | 2.331 | 0.000 | 0.000 | 0.000 |       |                                       |                                        |
|              | $c^{(AFP)} = 5$<br>nM  | 10    | 2.433 | 2.415 | 2.331 | 0.007 | 0.005 | 0.072 |                                       | $\tilde{c}^{(AFP)} \approx 7.3543$ nM  |
|              |                        | 20    | 2.495 | 2.473 | 2.331 | 0.015 | 0.010 | 0.118 |                                       |                                        |
|              |                        | 30    | 2.537 | 2.514 | 2.331 | 0.022 | 0.015 | 0.147 |                                       |                                        |
|              | $c^{(PTH)} = 20$<br>nM | 40    | 2.554 | 2.545 | 2.331 | 0.029 | 0.019 | 0.166 |                                       | $\tilde{c}^{(PTH)} \approx 41.3266$ nM |
|              |                        | 50    | 2.582 | 2.568 | 2.331 | 0.035 | 0.024 | 0.178 |                                       |                                        |
|              |                        | 60    | 2.596 | 2.587 | 2.331 | 0.042 | 0.029 | 0.186 |                                       |                                        |
|              |                        | 70    | 2.634 | 2.603 | 2.331 | 0.049 | 0.033 | 0.191 |                                       |                                        |
|              |                        | 80    | 2.641 | 2.617 | 2.331 | 0.055 | 0.038 | 0.194 |                                       |                                        |
|              |                        | 90    | 2.670 | 2.630 | 2.331 | 0.061 | 0.042 | 0.196 |                                       |                                        |
|              |                        | 100   | 2.645 | 2.642 | 2.331 | 0.068 | 0.046 | 0.197 |                                       |                                        |
|              |                        | 110   | 2.642 | 2.653 | 2.331 | 0.074 | 0.050 | 0.198 |                                       |                                        |
|              |                        | 120   | 2.674 | 2.664 | 2.331 | 0.080 | 0.055 | 0.198 |                                       |                                        |

|     |       |       |       |       |       |       |
|-----|-------|-------|-------|-------|-------|-------|
| 130 | 2.685 | 2.674 | 2.331 | 0.086 | 0.059 | 0.199 |
| 140 | 2.682 | 2.684 | 2.331 | 0.091 | 0.063 | 0.199 |
| 150 | 2.683 | 2.694 | 2.331 | 0.097 | 0.067 | 0.199 |
| 160 | 2.710 | 2.703 | 2.331 | 0.102 | 0.071 | 0.199 |
| 170 | 2.714 | 2.712 | 2.331 | 0.108 | 0.074 | 0.199 |
| 180 | 2.723 | 2.722 | 2.331 | 0.113 | 0.078 | 0.199 |
| 190 | 2.738 | 2.730 | 2.331 | 0.118 | 0.082 | 0.199 |
| 200 | 2.768 | 2.739 | 2.331 | 0.124 | 0.086 | 0.199 |
| 210 | 2.781 | 2.748 | 2.331 | 0.129 | 0.089 | 0.199 |
| 220 | 2.750 | 2.756 | 2.331 | 0.133 | 0.093 | 0.199 |
| 230 | 2.779 | 2.765 | 2.331 | 0.138 | 0.096 | 0.199 |
| 240 | 2.801 | 2.773 | 2.331 | 0.143 | 0.100 | 0.199 |
| 250 | 2.795 | 2.781 | 2.331 | 0.148 | 0.103 | 0.199 |
| 260 | 2.792 | 2.789 | 2.331 | 0.152 | 0.106 | 0.199 |
| 270 | 2.799 | 2.797 | 2.331 | 0.157 | 0.110 | 0.199 |
| 280 | 2.806 | 2.804 | 2.331 | 0.161 | 0.113 | 0.199 |
| 290 | 2.843 | 2.812 | 2.331 | 0.165 | 0.116 | 0.199 |
| 300 | 2.835 | 2.819 | 2.331 | 0.170 | 0.119 | 0.199 |
| 310 | 2.879 | 2.826 | 2.331 | 0.174 | 0.122 | 0.199 |
| 320 | 2.844 | 2.833 | 2.331 | 0.178 | 0.125 | 0.199 |
| 330 | 2.834 | 2.840 | 2.331 | 0.182 | 0.128 | 0.199 |
| 340 | 2.836 | 2.847 | 2.331 | 0.186 | 0.131 | 0.199 |
| 350 | 2.883 | 2.854 | 2.331 | 0.190 | 0.134 | 0.199 |
| 360 | 2.871 | 2.860 | 2.331 | 0.193 | 0.137 | 0.199 |
| 370 | 2.877 | 2.867 | 2.331 | 0.197 | 0.140 | 0.199 |
| 380 | 2.886 | 2.873 | 2.331 | 0.201 | 0.142 | 0.199 |
| 390 | 2.884 | 2.880 | 2.331 | 0.204 | 0.145 | 0.199 |
| 400 | 2.876 | 2.886 | 2.331 | 0.208 | 0.148 | 0.199 |
| 410 | 2.896 | 2.892 | 2.331 | 0.211 | 0.150 | 0.199 |
| 420 | 2.904 | 2.898 | 2.331 | 0.215 | 0.153 | 0.199 |
| 430 | 2.934 | 2.904 | 2.331 | 0.218 | 0.155 | 0.199 |
| 440 | 2.906 | 2.909 | 2.331 | 0.221 | 0.158 | 0.199 |
| 450 | 2.924 | 2.915 | 2.331 | 0.224 | 0.160 | 0.199 |
| 460 | 2.929 | 2.920 | 2.331 | 0.227 | 0.163 | 0.199 |
| 470 | 2.957 | 2.926 | 2.331 | 0.231 | 0.165 | 0.199 |
| 480 | 2.937 | 2.931 | 2.331 | 0.234 | 0.168 | 0.199 |
| 490 | 2.950 | 2.936 | 2.331 | 0.236 | 0.170 | 0.199 |
| 500 | 2.951 | 2.942 | 2.331 | 0.239 | 0.172 | 0.199 |
| 510 | 2.967 | 2.947 | 2.331 | 0.242 | 0.174 | 0.199 |
| 520 | 2.957 | 2.952 | 2.331 | 0.245 | 0.176 | 0.199 |
| 530 | 2.956 | 2.957 | 2.331 | 0.248 | 0.179 | 0.199 |
| 540 | 2.994 | 2.961 | 2.331 | 0.250 | 0.181 | 0.199 |
| 550 | 2.969 | 2.966 | 2.331 | 0.253 | 0.183 | 0.199 |
| 560 | 2.989 | 2.971 | 2.331 | 0.256 | 0.185 | 0.199 |
| 570 | 2.988 | 2.975 | 2.331 | 0.258 | 0.187 | 0.199 |
| 580 | 2.994 | 2.980 | 2.331 | 0.261 | 0.189 | 0.199 |

|              |                       |                        |       |       |       |       |       |       |                                          |       |                                           |
|--------------|-----------------------|------------------------|-------|-------|-------|-------|-------|-------|------------------------------------------|-------|-------------------------------------------|
|              |                       | 590                    | 2.999 | 2.984 | 2.331 | 0.263 | 0.191 | 0.199 |                                          |       |                                           |
|              |                       | 600                    | 3.017 | 2.988 | 2.331 | 0.265 | 0.193 | 0.199 |                                          |       |                                           |
| GFET<br>#S20 | $c^{(CEA)} = 5$<br>nM | -50                    | 2.369 | 2.330 | -     | -     | -     | -     | $\tilde{c}^{(CEA)} \approx$<br>3.9865 nM |       |                                           |
|              |                       | -40                    | 2.351 | 2.330 |       |       |       |       |                                          |       |                                           |
|              |                       | -30                    | 2.351 | 2.330 |       |       |       |       |                                          |       |                                           |
|              |                       | -20                    | 2.332 | 2.330 |       |       |       |       |                                          |       |                                           |
|              |                       | -10                    | 2.346 | 2.330 |       |       |       |       |                                          |       |                                           |
|              |                       | 0                      | 2.337 | 2.330 |       |       |       |       |                                          | 2.330 | 0.000                                     |
|              |                       | 10                     | 2.472 | 2.470 | 2.330 | 0.006 | 0.005 | 0.129 |                                          |       |                                           |
|              |                       | 20                     | 2.549 | 2.531 | 2.330 | 0.012 | 0.010 | 0.178 |                                          |       |                                           |
|              |                       | 30                     | 2.566 | 2.560 | 2.330 | 0.018 | 0.015 | 0.197 |                                          |       |                                           |
|              |                       | 40                     | 2.591 | 2.578 | 2.330 | 0.024 | 0.019 | 0.204 |                                          |       |                                           |
|              |                       | 50                     | 2.602 | 2.591 | 2.330 | 0.030 | 0.024 | 0.207 |                                          |       |                                           |
|              |                       | 60                     | 2.612 | 2.603 | 2.330 | 0.036 | 0.029 | 0.208 |                                          |       |                                           |
|              |                       | 70                     | 2.626 | 2.613 | 2.330 | 0.041 | 0.033 | 0.209 |                                          |       |                                           |
|              |                       | 80                     | 2.654 | 2.623 | 2.330 | 0.047 | 0.038 | 0.209 |                                          |       |                                           |
|              |                       | 90                     | 2.630 | 2.633 | 2.330 | 0.052 | 0.042 | 0.209 |                                          |       |                                           |
|              |                       | 100                    | 2.654 | 2.643 | 2.330 | 0.058 | 0.046 | 0.209 |                                          |       |                                           |
|              |                       | 110                    | 2.677 | 2.652 | 2.330 | 0.063 | 0.051 | 0.209 |                                          |       |                                           |
|              |                       | 120                    | 2.691 | 2.662 | 2.330 | 0.068 | 0.055 | 0.209 |                                          |       |                                           |
|              |                       | 130                    | 2.664 | 2.671 | 2.330 | 0.073 | 0.059 | 0.209 |                                          |       |                                           |
|              |                       | 140                    | 2.674 | 2.680 | 2.330 | 0.078 | 0.063 | 0.209 |                                          |       |                                           |
|              |                       | 150                    | 2.691 | 2.689 | 2.330 | 0.083 | 0.067 | 0.209 |                                          |       |                                           |
|              |                       | $c^{(AFP)} = 5$<br>nM  | 160   | 2.701 | 2.698 | 2.330 | 0.088 | 0.071 |                                          | 0.209 | $\tilde{c}^{(AFP)} \approx$<br>6.3895 nM  |
|              |                       |                        | 170   | 2.731 | 2.706 | 2.330 | 0.092 | 0.075 |                                          | 0.209 |                                           |
|              |                       | $c^{(PTH)} = 50$<br>nM | 180   | 2.719 | 2.715 | 2.330 | 0.097 | 0.079 |                                          | 0.209 | $\tilde{c}^{(PTH)} \approx$<br>92.1075 nM |
|              |                       |                        | 190   | 2.736 | 2.723 | 2.330 | 0.102 | 0.083 |                                          | 0.209 |                                           |
|              |                       |                        | 200   | 2.766 | 2.731 | 2.330 | 0.106 | 0.086 |                                          | 0.209 |                                           |
|              |                       |                        | 210   | 2.732 | 2.739 | 2.330 | 0.110 | 0.090 |                                          | 0.209 |                                           |
|              |                       |                        | 220   | 2.759 | 2.747 | 2.330 | 0.115 | 0.094 |                                          | 0.209 |                                           |
|              |                       |                        | 230   | 2.762 | 2.755 | 2.330 | 0.119 | 0.097 |                                          | 0.209 |                                           |
|              |                       |                        | 240   | 2.791 | 2.763 | 2.330 | 0.123 | 0.101 |                                          | 0.209 |                                           |
|              |                       |                        | 250   | 2.759 | 2.770 | 2.330 | 0.127 | 0.104 |                                          | 0.209 |                                           |
|              |                       |                        | 260   | 2.801 | 2.778 | 2.330 | 0.131 | 0.108 |                                          | 0.209 |                                           |
|              |                       |                        | 270   | 2.786 | 2.785 | 2.330 | 0.135 | 0.111 |                                          | 0.209 |                                           |
|              |                       |                        | 280   | 2.808 | 2.792 | 2.330 | 0.139 | 0.114 |                                          | 0.209 |                                           |
|              |                       |                        | 290   | 2.789 | 2.799 | 2.330 | 0.143 | 0.118 |                                          | 0.209 |                                           |
|              |                       |                        | 300   | 2.834 | 2.806 | 2.330 | 0.147 | 0.121 |                                          | 0.209 |                                           |
|              |                       |                        | 310   | 2.810 | 2.813 | 2.330 | 0.150 | 0.124 |                                          | 0.209 |                                           |
|              |                       |                        | 320   | 2.807 | 2.820 | 2.330 | 0.154 | 0.127 |                                          | 0.209 |                                           |
|              | 330                   | 2.832                  | 2.827 | 2.330 | 0.158 | 0.130 | 0.209 |       |                                          |       |                                           |
|              | 340                   | 2.823                  | 2.833 | 2.330 | 0.161 | 0.133 | 0.209 |       |                                          |       |                                           |
|              | 350                   | 2.844                  | 2.840 | 2.330 | 0.165 | 0.136 | 0.209 |       |                                          |       |                                           |
|              | 360                   | 2.860                  | 2.846 | 2.330 | 0.168 | 0.139 | 0.209 |       |                                          |       |                                           |
|              | 370                   | 2.859                  | 2.852 | 2.330 | 0.171 | 0.142 | 0.209 |       |                                          |       |                                           |
|              | 380                   | 2.909                  | 2.858 | 2.330 | 0.175 | 0.145 | 0.209 |       |                                          |       |                                           |

|              |                       |       |       |       |       |       |       |                                        |                                       |
|--------------|-----------------------|-------|-------|-------|-------|-------|-------|----------------------------------------|---------------------------------------|
|              |                       | 390   | 2.871 | 2.864 | 2.330 | 0.178 | 0.147 | 0.209                                  |                                       |
|              |                       | 400   | 2.892 | 2.870 | 2.330 | 0.181 | 0.150 | 0.209                                  |                                       |
|              |                       | 410   | 2.882 | 2.876 | 2.330 | 0.184 | 0.153 | 0.209                                  |                                       |
|              |                       | 420   | 2.887 | 2.882 | 2.330 | 0.187 | 0.156 | 0.209                                  |                                       |
|              |                       | 430   | 2.886 | 2.887 | 2.330 | 0.190 | 0.158 | 0.209                                  |                                       |
|              |                       | 440   | 2.917 | 2.893 | 2.330 | 0.193 | 0.161 | 0.209                                  |                                       |
|              |                       | 450   | 2.904 | 2.898 | 2.330 | 0.196 | 0.163 | 0.209                                  |                                       |
|              |                       | 460   | 2.923 | 2.904 | 2.330 | 0.199 | 0.166 | 0.209                                  |                                       |
|              |                       | 470   | 2.909 | 2.909 | 2.330 | 0.202 | 0.168 | 0.209                                  |                                       |
|              |                       | 480   | 2.937 | 2.914 | 2.330 | 0.204 | 0.171 | 0.209                                  |                                       |
|              |                       | 490   | 2.959 | 2.919 | 2.330 | 0.207 | 0.173 | 0.209                                  |                                       |
|              |                       | 500   | 2.939 | 2.924 | 2.330 | 0.210 | 0.176 | 0.209                                  |                                       |
|              |                       | 510   | 2.917 | 2.929 | 2.330 | 0.212 | 0.178 | 0.209                                  |                                       |
|              |                       | 520   | 2.926 | 2.934 | 2.330 | 0.215 | 0.180 | 0.209                                  |                                       |
|              |                       | 530   | 2.946 | 2.939 | 2.330 | 0.218 | 0.183 | 0.209                                  |                                       |
|              |                       | 540   | 2.932 | 2.944 | 2.330 | 0.220 | 0.185 | 0.209                                  |                                       |
|              |                       | 550   | 2.946 | 2.948 | 2.330 | 0.223 | 0.187 | 0.209                                  |                                       |
|              |                       | 560   | 2.964 | 2.953 | 2.330 | 0.225 | 0.189 | 0.209                                  |                                       |
|              |                       | 570   | 2.953 | 2.957 | 2.330 | 0.227 | 0.191 | 0.209                                  |                                       |
|              |                       | 580   | 2.984 | 2.962 | 2.330 | 0.230 | 0.193 | 0.209                                  |                                       |
|              |                       | 590   | 2.974 | 2.966 | 2.330 | 0.232 | 0.195 | 0.209                                  |                                       |
|              |                       | 600   | 2.998 | 2.971 | 2.330 | 0.234 | 0.197 | 0.209                                  |                                       |
| GFET<br>#S21 | $c^{(CEA)} = 5$<br>nM | -50   | 2.336 | 2.319 | -     | -     | -     | -                                      | $\tilde{c}^{(CEA)} \approx 5.3451$ nM |
|              |                       | -40   | 2.325 | 2.319 |       |       |       |                                        |                                       |
|              |                       | -30   | 2.358 | 2.319 |       |       |       |                                        |                                       |
|              |                       | -20   | 2.356 | 2.319 |       |       |       |                                        |                                       |
|              |                       | -10   | 2.337 | 2.319 |       |       |       |                                        |                                       |
|              | 0                     | 2.338 | 2.319 | 2.319 | 0.000 | 0.000 | 0.000 |                                        |                                       |
|              | 10                    | 2.367 | 2.352 | 2.319 | 0.007 | 0.009 | 0.016 |                                        |                                       |
|              | 20                    | 2.389 | 2.382 | 2.319 | 0.014 | 0.018 | 0.031 |                                        |                                       |
|              | 30                    | 2.432 | 2.411 | 2.319 | 0.021 | 0.027 | 0.044 |                                        |                                       |
|              | 40                    | 2.455 | 2.439 | 2.319 | 0.027 | 0.035 | 0.057 |                                        |                                       |
|              | 50                    | 2.478 | 2.465 | 2.319 | 0.034 | 0.043 | 0.068 |                                        |                                       |
|              | 60                    | 2.499 | 2.489 | 2.319 | 0.040 | 0.052 | 0.078 | $\tilde{c}^{(AFP)} \approx 14.0981$ nM |                                       |
|              | 70                    | 2.526 | 2.513 | 2.319 | 0.047 | 0.059 | 0.088 |                                        |                                       |
|              | 80                    | 2.530 | 2.535 | 2.319 | 0.053 | 0.067 | 0.096 | $\tilde{c}^{(PTH)} \approx 6.4231$ nM  |                                       |
|              | 90                    | 2.585 | 2.557 | 2.319 | 0.059 | 0.075 | 0.104 |                                        |                                       |
|              | 100                   | 2.593 | 2.577 | 2.319 | 0.064 | 0.082 | 0.111 |                                        |                                       |
|              | 110                   | 2.603 | 2.597 | 2.319 | 0.070 | 0.089 | 0.118 |                                        |                                       |
|              | 120                   | 2.623 | 2.615 | 2.319 | 0.076 | 0.096 | 0.124 |                                        |                                       |
|              | 130                   | 2.651 | 2.633 | 2.319 | 0.081 | 0.103 | 0.129 |                                        |                                       |
|              | 140                   | 2.656 | 2.650 | 2.319 | 0.086 | 0.110 | 0.134 |                                        |                                       |
| 150          | 2.691                 | 2.667 | 2.319 | 0.092 | 0.117 | 0.139 |       |                                        |                                       |
| 160          | 2.707                 | 2.683 | 2.319 | 0.097 | 0.123 | 0.143 |       |                                        |                                       |
| 170          | 2.717                 | 2.698 | 2.319 | 0.102 | 0.129 | 0.147 |       |                                        |                                       |
| 180          | 2.716                 | 2.712 | 2.319 | 0.107 | 0.136 | 0.151 |       |                                        |                                       |

|              |                        |     |       |       |       |       |       |       |                                          |   |   |   |                                           |
|--------------|------------------------|-----|-------|-------|-------|-------|-------|-------|------------------------------------------|---|---|---|-------------------------------------------|
|              |                        | 190 | 2.736 | 2.726 | 2.319 | 0.111 | 0.142 | 0.154 |                                          |   |   |   |                                           |
|              |                        | 200 | 2.732 | 2.740 | 2.319 | 0.116 | 0.148 | 0.157 |                                          |   |   |   |                                           |
|              |                        | 210 | 2.762 | 2.753 | 2.319 | 0.121 | 0.153 | 0.159 |                                          |   |   |   |                                           |
|              |                        | 220 | 2.783 | 2.765 | 2.319 | 0.125 | 0.159 | 0.162 |                                          |   |   |   |                                           |
|              |                        | 230 | 2.760 | 2.777 | 2.319 | 0.129 | 0.164 | 0.164 |                                          |   |   |   |                                           |
|              |                        | 240 | 2.800 | 2.789 | 2.319 | 0.134 | 0.170 | 0.166 |                                          |   |   |   |                                           |
|              |                        | 250 | 2.818 | 2.800 | 2.319 | 0.138 | 0.175 | 0.168 |                                          |   |   |   |                                           |
|              |                        | 260 | 2.839 | 2.811 | 2.319 | 0.142 | 0.180 | 0.170 |                                          |   |   |   |                                           |
|              |                        | 270 | 2.839 | 2.822 | 2.319 | 0.146 | 0.185 | 0.171 |                                          |   |   |   |                                           |
|              |                        | 280 | 2.830 | 2.832 | 2.319 | 0.150 | 0.190 | 0.173 |                                          |   |   |   |                                           |
|              |                        | 290 | 2.850 | 2.842 | 2.319 | 0.154 | 0.195 | 0.174 |                                          |   |   |   |                                           |
|              |                        | 300 | 2.856 | 2.852 | 2.319 | 0.157 | 0.200 | 0.175 |                                          |   |   |   |                                           |
|              |                        | 310 | 2.876 | 2.861 | 2.319 | 0.161 | 0.204 | 0.177 |                                          |   |   |   |                                           |
|              |                        | 320 | 2.878 | 2.870 | 2.319 | 0.165 | 0.209 | 0.178 |                                          |   |   |   |                                           |
|              |                        | 330 | 2.876 | 2.879 | 2.319 | 0.168 | 0.213 | 0.178 |                                          |   |   |   |                                           |
|              |                        | 340 | 2.896 | 2.888 | 2.319 | 0.172 | 0.217 | 0.179 |                                          |   |   |   |                                           |
|              |                        | 350 | 2.882 | 2.896 | 2.319 | 0.175 | 0.222 | 0.180 |                                          |   |   |   |                                           |
|              |                        | 360 | 2.885 | 2.904 | 2.319 | 0.178 | 0.226 | 0.181 |                                          |   |   |   |                                           |
|              |                        | 370 | 2.921 | 2.912 | 2.319 | 0.181 | 0.230 | 0.181 |                                          |   |   |   |                                           |
|              |                        | 380 | 2.912 | 2.919 | 2.319 | 0.184 | 0.234 | 0.182 |                                          |   |   |   |                                           |
|              |                        | 390 | 2.936 | 2.927 | 2.319 | 0.188 | 0.237 | 0.183 |                                          |   |   |   |                                           |
|              |                        | 400 | 2.946 | 2.934 | 2.319 | 0.191 | 0.241 | 0.183 |                                          |   |   |   |                                           |
|              |                        | 410 | 2.956 | 2.941 | 2.319 | 0.193 | 0.245 | 0.183 |                                          |   |   |   |                                           |
|              |                        | 420 | 2.947 | 2.948 | 2.319 | 0.196 | 0.248 | 0.184 |                                          |   |   |   |                                           |
|              |                        | 430 | 2.959 | 2.955 | 2.319 | 0.199 | 0.252 | 0.184 |                                          |   |   |   |                                           |
|              |                        | 440 | 2.984 | 2.961 | 2.319 | 0.202 | 0.255 | 0.185 |                                          |   |   |   |                                           |
|              |                        | 450 | 2.965 | 2.967 | 2.319 | 0.205 | 0.259 | 0.185 |                                          |   |   |   |                                           |
|              |                        | 460 | 2.997 | 2.974 | 2.319 | 0.207 | 0.262 | 0.185 |                                          |   |   |   |                                           |
|              |                        | 470 | 3.006 | 2.980 | 2.319 | 0.210 | 0.265 | 0.185 |                                          |   |   |   |                                           |
|              |                        | 480 | 2.985 | 2.986 | 2.319 | 0.212 | 0.268 | 0.186 |                                          |   |   |   |                                           |
|              |                        | 490 | 3.014 | 2.991 | 2.319 | 0.215 | 0.271 | 0.186 |                                          |   |   |   |                                           |
|              |                        | 500 | 2.995 | 2.997 | 2.319 | 0.217 | 0.274 | 0.186 |                                          |   |   |   |                                           |
|              |                        | 510 | 3.033 | 3.002 | 2.319 | 0.219 | 0.277 | 0.186 |                                          |   |   |   |                                           |
|              |                        | 520 | 3.018 | 3.008 | 2.319 | 0.222 | 0.280 | 0.187 |                                          |   |   |   |                                           |
|              |                        | 530 | 3.019 | 3.013 | 2.319 | 0.224 | 0.283 | 0.187 |                                          |   |   |   |                                           |
|              |                        | 540 | 3.000 | 3.018 | 2.319 | 0.226 | 0.285 | 0.187 |                                          |   |   |   |                                           |
|              |                        | 550 | 3.011 | 3.023 | 2.319 | 0.228 | 0.288 | 0.187 |                                          |   |   |   |                                           |
|              |                        | 560 | 3.033 | 3.028 | 2.319 | 0.230 | 0.291 | 0.187 |                                          |   |   |   |                                           |
|              |                        | 570 | 3.030 | 3.032 | 2.319 | 0.233 | 0.293 | 0.187 |                                          |   |   |   |                                           |
|              |                        | 580 | 3.026 | 3.037 | 2.319 | 0.235 | 0.296 | 0.187 |                                          |   |   |   |                                           |
|              |                        | 590 | 3.060 | 3.041 | 2.319 | 0.236 | 0.298 | 0.187 |                                          |   |   |   |                                           |
|              |                        | 600 | 3.083 | 3.046 | 2.319 | 0.238 | 0.301 | 0.187 |                                          |   |   |   |                                           |
| GFET<br>#S22 | $c^{(CEA)} = 5$<br>nM  | -50 | 2.340 | 2.318 | -     | -     | -     | -     | $\tilde{c}^{(CEA)} \approx$<br>5.5876 nM |   |   |   |                                           |
|              |                        | -40 | 2.321 | 2.318 |       |       |       |       |                                          |   |   |   |                                           |
|              | $c^{(AFP)} = 20$<br>nM | -30 | 2.316 | 2.318 |       |       |       |       | -                                        | - | - | - | $\tilde{c}^{(AFP)} \approx$<br>14.4432 nM |
|              |                        | -20 | 2.318 | 2.318 |       |       |       |       |                                          |   |   |   |                                           |



|                       |       |       |       |       |       |       |       |                                         |
|-----------------------|-------|-------|-------|-------|-------|-------|-------|-----------------------------------------|
| $c^{(PTH)} = 5$<br>nM | -10   | 2.310 | 2.318 |       |       |       |       | $\bar{c}^{(PTH)} \approx$<br>14.3329 nM |
|                       | 0     | 2.327 | 2.318 | 2.318 | 0.000 | 0.000 | 0.000 |                                         |
|                       | 10    | 2.385 | 2.367 | 2.318 | 0.008 | 0.009 | 0.032 |                                         |
|                       | 20    | 2.410 | 2.410 | 2.318 | 0.015 | 0.018 | 0.059 |                                         |
|                       | 30    | 2.456 | 2.449 | 2.318 | 0.022 | 0.027 | 0.082 |                                         |
|                       | 40    | 2.477 | 2.484 | 2.318 | 0.029 | 0.035 | 0.101 |                                         |
|                       | 50    | 2.528 | 2.515 | 2.318 | 0.036 | 0.044 | 0.117 |                                         |
|                       | 60    | 2.567 | 2.544 | 2.318 | 0.043 | 0.052 | 0.131 |                                         |
|                       | 70    | 2.569 | 2.570 | 2.318 | 0.050 | 0.060 | 0.142 |                                         |
|                       | 80    | 2.604 | 2.594 | 2.318 | 0.056 | 0.068 | 0.152 |                                         |
|                       | 90    | 2.627 | 2.616 | 2.318 | 0.062 | 0.075 | 0.160 |                                         |
|                       | 100   | 2.614 | 2.637 | 2.318 | 0.069 | 0.083 | 0.167 |                                         |
|                       | 110   | 2.675 | 2.656 | 2.318 | 0.075 | 0.090 | 0.173 |                                         |
|                       | 120   | 2.657 | 2.674 | 2.318 | 0.080 | 0.097 | 0.178 |                                         |
|                       | 130   | 2.687 | 2.690 | 2.318 | 0.086 | 0.104 | 0.182 |                                         |
|                       | 140   | 2.720 | 2.706 | 2.318 | 0.092 | 0.111 | 0.185 |                                         |
|                       | 150   | 2.724 | 2.721 | 2.318 | 0.097 | 0.118 | 0.188 |                                         |
|                       | 160   | 2.741 | 2.736 | 2.318 | 0.103 | 0.124 | 0.191 |                                         |
|                       | 170   | 2.747 | 2.749 | 2.318 | 0.108 | 0.130 | 0.193 |                                         |
|                       | 180   | 2.755 | 2.763 | 2.318 | 0.113 | 0.137 | 0.195 |                                         |
|                       | 190   | 2.773 | 2.775 | 2.318 | 0.118 | 0.143 | 0.196 |                                         |
|                       | 200   | 2.806 | 2.787 | 2.318 | 0.123 | 0.149 | 0.197 |                                         |
|                       | 210   | 2.784 | 2.799 | 2.318 | 0.128 | 0.154 | 0.198 |                                         |
|                       | 220   | 2.829 | 2.810 | 2.318 | 0.132 | 0.160 | 0.199 |                                         |
|                       | 230   | 2.841 | 2.821 | 2.318 | 0.137 | 0.165 | 0.200 |                                         |
|                       | 240   | 2.841 | 2.831 | 2.318 | 0.141 | 0.171 | 0.201 |                                         |
|                       | 250   | 2.866 | 2.842 | 2.318 | 0.146 | 0.176 | 0.201 |                                         |
|                       | 260   | 2.852 | 2.851 | 2.318 | 0.150 | 0.181 | 0.202 |                                         |
|                       | 270   | 2.863 | 2.861 | 2.318 | 0.154 | 0.186 | 0.202 |                                         |
|                       | 280   | 2.882 | 2.870 | 2.318 | 0.158 | 0.191 | 0.202 |                                         |
|                       | 290   | 2.888 | 2.879 | 2.318 | 0.162 | 0.196 | 0.203 |                                         |
|                       | 300   | 2.888 | 2.888 | 2.318 | 0.166 | 0.201 | 0.203 |                                         |
|                       | 310   | 2.892 | 2.897 | 2.318 | 0.170 | 0.205 | 0.203 |                                         |
|                       | 320   | 2.929 | 2.905 | 2.318 | 0.174 | 0.210 | 0.203 |                                         |
|                       | 330   | 2.915 | 2.913 | 2.318 | 0.177 | 0.214 | 0.203 |                                         |
|                       | 340   | 2.958 | 2.921 | 2.318 | 0.181 | 0.218 | 0.203 |                                         |
|                       | 350   | 2.921 | 2.929 | 2.318 | 0.184 | 0.223 | 0.204 |                                         |
|                       | 360   | 2.953 | 2.936 | 2.318 | 0.188 | 0.227 | 0.204 |                                         |
|                       | 370   | 2.978 | 2.944 | 2.318 | 0.191 | 0.231 | 0.204 |                                         |
|                       | 380   | 2.981 | 2.951 | 2.318 | 0.194 | 0.235 | 0.204 |                                         |
|                       | 390   | 2.957 | 2.958 | 2.318 | 0.197 | 0.238 | 0.204 |                                         |
|                       | 400   | 2.985 | 2.965 | 2.318 | 0.201 | 0.242 | 0.204 |                                         |
|                       | 410   | 2.996 | 2.972 | 2.318 | 0.204 | 0.246 | 0.204 |                                         |
|                       | 420   | 2.965 | 2.978 | 2.318 | 0.207 | 0.249 | 0.204 |                                         |
| 430                   | 3.002 | 2.985 | 2.318 | 0.209 | 0.253 | 0.204 |       |                                         |
| 440                   | 3.029 | 2.991 | 2.318 | 0.212 | 0.256 | 0.204 |       |                                         |

|              |                       |       |       |       |       |       |       |                                        |                                       |
|--------------|-----------------------|-------|-------|-------|-------|-------|-------|----------------------------------------|---------------------------------------|
|              |                       | 450   | 2.993 | 2.997 | 2.318 | 0.215 | 0.259 | 0.204                                  |                                       |
|              |                       | 460   | 3.022 | 3.003 | 2.318 | 0.218 | 0.263 | 0.204                                  |                                       |
|              |                       | 470   | 3.013 | 3.009 | 2.318 | 0.220 | 0.266 | 0.204                                  |                                       |
|              |                       | 480   | 3.017 | 3.014 | 2.318 | 0.223 | 0.269 | 0.204                                  |                                       |
|              |                       | 490   | 3.018 | 3.020 | 2.318 | 0.225 | 0.272 | 0.204                                  |                                       |
|              |                       | 500   | 3.022 | 3.025 | 2.318 | 0.228 | 0.275 | 0.204                                  |                                       |
|              |                       | 510   | 3.038 | 3.031 | 2.318 | 0.230 | 0.278 | 0.204                                  |                                       |
|              |                       | 520   | 3.041 | 3.036 | 2.318 | 0.233 | 0.281 | 0.204                                  |                                       |
|              |                       | 530   | 3.051 | 3.041 | 2.318 | 0.235 | 0.283 | 0.204                                  |                                       |
|              |                       | 540   | 3.062 | 3.046 | 2.318 | 0.237 | 0.286 | 0.204                                  |                                       |
|              |                       | 550   | 3.068 | 3.051 | 2.318 | 0.239 | 0.289 | 0.204                                  |                                       |
|              |                       | 560   | 3.065 | 3.055 | 2.318 | 0.241 | 0.291 | 0.204                                  |                                       |
|              |                       | 570   | 3.074 | 3.060 | 2.318 | 0.244 | 0.294 | 0.204                                  |                                       |
|              |                       | 580   | 3.093 | 3.064 | 2.318 | 0.246 | 0.296 | 0.204                                  |                                       |
|              |                       | 590   | 3.079 | 3.069 | 2.318 | 0.248 | 0.299 | 0.204                                  |                                       |
|              |                       | 600   | 3.109 | 3.073 | 2.318 | 0.250 | 0.301 | 0.204                                  |                                       |
| GFET<br>#S23 | $c^{(CEA)} = 5$<br>nM | -50   | 2.289 | 2.284 | -     | -     | -     | -                                      | $\tilde{c}^{(CEA)} \approx 3.9872$ nM |
|              |                       | -40   | 2.303 | 2.284 |       |       |       |                                        |                                       |
|              |                       | -30   | 2.307 | 2.284 |       |       |       |                                        |                                       |
|              |                       | -20   | 2.291 | 2.284 |       |       |       |                                        |                                       |
|              |                       | -10   | 2.304 | 2.284 |       |       |       |                                        |                                       |
|              | 0                     | 2.289 | 2.284 | 2.284 | 0.000 | 0.000 | 0.000 |                                        |                                       |
|              | 10                    | 2.407 | 2.403 | 2.284 | 0.006 | 0.009 | 0.104 |                                        |                                       |
|              | 20                    | 2.487 | 2.478 | 2.284 | 0.012 | 0.018 | 0.164 |                                        |                                       |
|              | 30                    | 2.525 | 2.527 | 2.284 | 0.018 | 0.026 | 0.199 |                                        |                                       |
|              | 40                    | 2.602 | 2.561 | 2.284 | 0.023 | 0.034 | 0.219 |                                        |                                       |
|              | 50                    | 2.593 | 2.586 | 2.284 | 0.029 | 0.042 | 0.231 |                                        |                                       |
|              | 60                    | 2.599 | 2.606 | 2.284 | 0.034 | 0.050 | 0.238 |                                        |                                       |
|              | 70                    | 2.631 | 2.623 | 2.284 | 0.040 | 0.058 | 0.242 |                                        |                                       |
|              | 80                    | 2.681 | 2.639 | 2.284 | 0.045 | 0.066 | 0.244 |                                        |                                       |
|              | 90                    | 2.666 | 2.653 | 2.284 | 0.050 | 0.073 | 0.245 | $\tilde{c}^{(AFP)} \approx 12.5629$ nM |                                       |
|              | 100                   | 2.676 | 2.666 | 2.284 | 0.055 | 0.081 | 0.246 |                                        |                                       |
|              | 110                   | 2.702 | 2.678 | 2.284 | 0.060 | 0.088 | 0.246 |                                        |                                       |
|              | 120                   | 2.708 | 2.690 | 2.284 | 0.065 | 0.095 | 0.247 | $\tilde{c}^{(PTH)} \approx 51.4323$ nM |                                       |
|              | 130                   | 2.715 | 2.702 | 2.284 | 0.070 | 0.102 | 0.247 |                                        |                                       |
|              | 140                   | 2.714 | 2.714 | 2.284 | 0.075 | 0.108 | 0.247 |                                        |                                       |
|              | 150                   | 2.736 | 2.725 | 2.284 | 0.079 | 0.115 | 0.247 |                                        |                                       |
|              | 160                   | 2.750 | 2.736 | 2.284 | 0.084 | 0.121 | 0.247 |                                        |                                       |
|              | 170                   | 2.777 | 2.747 | 2.284 | 0.088 | 0.128 | 0.247 |                                        |                                       |
|              | 180                   | 2.776 | 2.758 | 2.284 | 0.093 | 0.134 | 0.247 |                                        |                                       |
| 190          | 2.765                 | 2.768 | 2.284 | 0.097 | 0.140 | 0.247 |       |                                        |                                       |
| 200          | 2.772                 | 2.778 | 2.284 | 0.102 | 0.146 | 0.247 |       |                                        |                                       |
| 210          | 2.799                 | 2.788 | 2.284 | 0.106 | 0.151 | 0.247 |       |                                        |                                       |
| 220          | 2.816                 | 2.798 | 2.284 | 0.110 | 0.157 | 0.247 |       |                                        |                                       |
| 230          | 2.845                 | 2.808 | 2.284 | 0.114 | 0.163 | 0.247 |       |                                        |                                       |
| 240          | 2.820                 | 2.817 | 2.284 | 0.118 | 0.168 | 0.247 |       |                                        |                                       |

|              |                        |       |       |       |       |       |       |       |                                            |
|--------------|------------------------|-------|-------|-------|-------|-------|-------|-------|--------------------------------------------|
|              |                        | 250   | 2.855 | 2.826 | 2.284 | 0.122 | 0.173 | 0.247 |                                            |
|              |                        | 260   | 2.858 | 2.835 | 2.284 | 0.126 | 0.179 | 0.247 |                                            |
|              |                        | 270   | 2.862 | 2.844 | 2.284 | 0.130 | 0.184 | 0.247 |                                            |
|              |                        | 280   | 2.851 | 2.853 | 2.284 | 0.133 | 0.189 | 0.247 |                                            |
|              |                        | 290   | 2.874 | 2.861 | 2.284 | 0.137 | 0.194 | 0.247 |                                            |
|              |                        | 300   | 2.891 | 2.870 | 2.284 | 0.141 | 0.198 | 0.247 |                                            |
|              |                        | 310   | 2.894 | 2.878 | 2.284 | 0.144 | 0.203 | 0.247 |                                            |
|              |                        | 320   | 2.915 | 2.886 | 2.284 | 0.148 | 0.208 | 0.247 |                                            |
|              |                        | 330   | 2.888 | 2.894 | 2.284 | 0.151 | 0.212 | 0.247 |                                            |
|              |                        | 340   | 2.898 | 2.902 | 2.284 | 0.154 | 0.216 | 0.247 |                                            |
|              |                        | 350   | 2.917 | 2.909 | 2.284 | 0.158 | 0.221 | 0.247 |                                            |
|              |                        | 360   | 2.921 | 2.917 | 2.284 | 0.161 | 0.225 | 0.247 |                                            |
|              |                        | 370   | 2.946 | 2.924 | 2.284 | 0.164 | 0.229 | 0.247 |                                            |
|              |                        | 380   | 2.952 | 2.931 | 2.284 | 0.167 | 0.233 | 0.247 |                                            |
|              |                        | 390   | 2.942 | 2.938 | 2.284 | 0.170 | 0.237 | 0.247 |                                            |
|              |                        | 400   | 2.982 | 2.945 | 2.284 | 0.173 | 0.241 | 0.247 |                                            |
|              |                        | 410   | 2.961 | 2.952 | 2.284 | 0.176 | 0.245 | 0.247 |                                            |
|              |                        | 420   | 2.949 | 2.959 | 2.284 | 0.179 | 0.248 | 0.247 |                                            |
|              |                        | 430   | 2.980 | 2.965 | 2.284 | 0.182 | 0.252 | 0.247 |                                            |
|              |                        | 440   | 2.996 | 2.972 | 2.284 | 0.185 | 0.256 | 0.247 |                                            |
|              |                        | 450   | 3.001 | 2.978 | 2.284 | 0.188 | 0.259 | 0.247 |                                            |
|              |                        | 460   | 3.005 | 2.984 | 2.284 | 0.191 | 0.262 | 0.247 |                                            |
|              |                        | 470   | 3.002 | 2.990 | 2.284 | 0.193 | 0.266 | 0.247 |                                            |
|              |                        | 480   | 2.991 | 2.996 | 2.284 | 0.196 | 0.269 | 0.247 |                                            |
|              |                        | 490   | 3.015 | 3.002 | 2.284 | 0.198 | 0.272 | 0.247 |                                            |
|              |                        | 500   | 3.017 | 3.007 | 2.284 | 0.201 | 0.275 | 0.247 |                                            |
|              |                        | 510   | 3.017 | 3.013 | 2.284 | 0.204 | 0.278 | 0.247 |                                            |
|              |                        | 520   | 3.035 | 3.018 | 2.284 | 0.206 | 0.281 | 0.247 |                                            |
|              |                        | 530   | 3.035 | 3.024 | 2.284 | 0.208 | 0.284 | 0.247 |                                            |
|              |                        | 540   | 3.034 | 3.029 | 2.284 | 0.211 | 0.287 | 0.247 |                                            |
|              |                        | 550   | 3.039 | 3.034 | 2.284 | 0.213 | 0.290 | 0.247 |                                            |
|              |                        | 560   | 3.065 | 3.039 | 2.284 | 0.215 | 0.293 | 0.247 |                                            |
|              |                        | 570   | 3.065 | 3.044 | 2.284 | 0.218 | 0.295 | 0.247 |                                            |
|              |                        | 580   | 3.066 | 3.049 | 2.284 | 0.220 | 0.298 | 0.247 |                                            |
|              |                        | 590   | 3.056 | 3.054 | 2.284 | 0.222 | 0.301 | 0.247 |                                            |
|              |                        | 600   | 3.031 | 3.058 | 2.284 | 0.224 | 0.303 | 0.247 |                                            |
| GFET<br>#S24 | $c^{(CEA)} = 5$<br>nM  | -50   | 2.326 | 2.312 | -     | -     | -     | -     | $\tilde{c}^{(CEA)} \approx$<br>3.5512 nM   |
|              |                        | -40   | 2.317 | 2.312 |       |       |       |       |                                            |
|              |                        | -30   | 2.338 | 2.312 |       |       |       |       |                                            |
|              |                        | -20   | 2.309 | 2.312 |       |       |       |       |                                            |
|              | $c^{(AFP)} = 20$<br>nM | -10   | 2.314 | 2.312 | 2.312 | 0.000 | 0.000 | 0.000 | $\tilde{c}^{(AFP)} \approx$<br>12.0354 nM  |
|              |                        | 0     | 2.315 | 2.312 |       |       |       |       |                                            |
|              | $c^{(PTH)} = 50$<br>nM | 10    | 2.506 | 2.506 | 2.312 | 0.005 | 0.009 | 0.181 | $\tilde{c}^{(PTH)} \approx$<br>117.3654 nM |
|              |                        | 20    | 2.582 | 2.573 | 2.312 | 0.010 | 0.017 | 0.234 |                                            |
|              |                        | 30    | 2.616 | 2.602 | 2.312 | 0.015 | 0.025 | 0.250 |                                            |
| 40           |                        | 2.617 | 2.619 | 2.312 | 0.020 | 0.033 | 0.255 |       |                                            |

|     |       |       |       |       |       |       |
|-----|-------|-------|-------|-------|-------|-------|
| 50  | 2.645 | 2.633 | 2.312 | 0.024 | 0.041 | 0.256 |
| 60  | 2.658 | 2.646 | 2.312 | 0.029 | 0.049 | 0.257 |
| 70  | 2.665 | 2.658 | 2.312 | 0.033 | 0.057 | 0.257 |
| 80  | 2.680 | 2.670 | 2.312 | 0.038 | 0.064 | 0.257 |
| 90  | 2.689 | 2.682 | 2.312 | 0.042 | 0.071 | 0.257 |
| 100 | 2.719 | 2.694 | 2.312 | 0.047 | 0.078 | 0.257 |
| 110 | 2.707 | 2.705 | 2.312 | 0.051 | 0.085 | 0.257 |
| 120 | 2.745 | 2.716 | 2.312 | 0.055 | 0.092 | 0.257 |
| 130 | 2.745 | 2.727 | 2.312 | 0.059 | 0.099 | 0.257 |
| 140 | 2.762 | 2.737 | 2.312 | 0.063 | 0.106 | 0.257 |
| 150 | 2.752 | 2.748 | 2.312 | 0.067 | 0.112 | 0.257 |
| 160 | 2.776 | 2.758 | 2.312 | 0.071 | 0.118 | 0.257 |
| 170 | 2.758 | 2.768 | 2.312 | 0.075 | 0.124 | 0.257 |
| 180 | 2.797 | 2.778 | 2.312 | 0.079 | 0.130 | 0.257 |
| 190 | 2.786 | 2.788 | 2.312 | 0.083 | 0.136 | 0.257 |
| 200 | 2.814 | 2.797 | 2.312 | 0.087 | 0.142 | 0.257 |
| 210 | 2.803 | 2.807 | 2.312 | 0.090 | 0.148 | 0.257 |
| 220 | 2.819 | 2.816 | 2.312 | 0.094 | 0.153 | 0.257 |
| 230 | 2.851 | 2.825 | 2.312 | 0.097 | 0.159 | 0.257 |
| 240 | 2.844 | 2.834 | 2.312 | 0.101 | 0.164 | 0.257 |
| 250 | 2.848 | 2.842 | 2.312 | 0.104 | 0.169 | 0.257 |
| 260 | 2.873 | 2.851 | 2.312 | 0.108 | 0.175 | 0.257 |
| 270 | 2.849 | 2.859 | 2.312 | 0.111 | 0.180 | 0.257 |
| 280 | 2.895 | 2.867 | 2.312 | 0.114 | 0.185 | 0.257 |
| 290 | 2.882 | 2.875 | 2.312 | 0.118 | 0.189 | 0.257 |
| 300 | 2.867 | 2.883 | 2.312 | 0.121 | 0.194 | 0.257 |
| 310 | 2.888 | 2.891 | 2.312 | 0.124 | 0.199 | 0.257 |
| 320 | 2.925 | 2.899 | 2.312 | 0.127 | 0.203 | 0.257 |
| 330 | 2.909 | 2.906 | 2.312 | 0.130 | 0.208 | 0.257 |
| 340 | 2.919 | 2.913 | 2.312 | 0.133 | 0.212 | 0.257 |
| 350 | 2.916 | 2.920 | 2.312 | 0.136 | 0.216 | 0.257 |
| 360 | 2.922 | 2.928 | 2.312 | 0.139 | 0.220 | 0.257 |
| 370 | 2.953 | 2.934 | 2.312 | 0.142 | 0.224 | 0.257 |
| 380 | 2.943 | 2.941 | 2.312 | 0.144 | 0.228 | 0.257 |
| 390 | 2.968 | 2.948 | 2.312 | 0.147 | 0.232 | 0.257 |
| 400 | 2.957 | 2.954 | 2.312 | 0.150 | 0.236 | 0.257 |
| 410 | 2.957 | 2.961 | 2.312 | 0.152 | 0.240 | 0.257 |
| 420 | 2.979 | 2.967 | 2.312 | 0.155 | 0.244 | 0.257 |
| 430 | 2.988 | 2.973 | 2.312 | 0.158 | 0.247 | 0.257 |
| 440 | 2.986 | 2.979 | 2.312 | 0.160 | 0.251 | 0.257 |
| 450 | 3.017 | 2.985 | 2.312 | 0.163 | 0.254 | 0.257 |
| 460 | 3.001 | 2.991 | 2.312 | 0.165 | 0.258 | 0.257 |
| 470 | 3.008 | 2.997 | 2.312 | 0.168 | 0.261 | 0.257 |
| 480 | 3.029 | 3.003 | 2.312 | 0.170 | 0.264 | 0.257 |
| 490 | 3.042 | 3.008 | 2.312 | 0.172 | 0.267 | 0.257 |
| 500 | 3.021 | 3.014 | 2.312 | 0.175 | 0.270 | 0.257 |

|              |                        |       |       |       |       |       |       |       |                                       |                                        |
|--------------|------------------------|-------|-------|-------|-------|-------|-------|-------|---------------------------------------|----------------------------------------|
|              |                        | 510   | 3.004 | 3.019 | 2.312 | 0.177 | 0.273 | 0.257 |                                       |                                        |
|              |                        | 520   | 3.057 | 3.024 | 2.312 | 0.179 | 0.276 | 0.257 |                                       |                                        |
|              |                        | 530   | 3.041 | 3.029 | 2.312 | 0.181 | 0.279 | 0.257 |                                       |                                        |
|              |                        | 540   | 3.041 | 3.034 | 2.312 | 0.184 | 0.282 | 0.257 |                                       |                                        |
|              |                        | 550   | 3.058 | 3.039 | 2.312 | 0.186 | 0.285 | 0.257 |                                       |                                        |
|              |                        | 560   | 3.046 | 3.044 | 2.312 | 0.188 | 0.288 | 0.257 |                                       |                                        |
|              |                        | 570   | 3.093 | 3.049 | 2.312 | 0.190 | 0.290 | 0.257 |                                       |                                        |
|              |                        | 580   | 3.056 | 3.054 | 2.312 | 0.192 | 0.293 | 0.257 |                                       |                                        |
|              |                        | 590   | 3.078 | 3.058 | 2.312 | 0.194 | 0.296 | 0.257 |                                       |                                        |
|              |                        | 600   | 3.086 | 3.063 | 2.312 | 0.196 | 0.298 | 0.257 |                                       |                                        |
| GFET<br>#S25 | $c^{(CEA)} = 5$<br>nM  | -50   | 2.357 | 2.316 | -     | -     | -     | -     | $\tilde{c}^{(CEA)} \approx 3.9815$ nM |                                        |
|              |                        | -40   | 2.306 | 2.316 |       |       |       |       |                                       |                                        |
|              |                        | -30   | 2.330 | 2.316 |       |       |       |       |                                       |                                        |
|              |                        | -20   | 2.341 | 2.316 |       |       |       |       |                                       |                                        |
|              |                        | -10   | 2.324 | 2.316 |       |       |       |       |                                       |                                        |
|              | 0                      | 2.324 | 2.316 | 2.316 | 0.000 | 0.000 | 0.000 |       |                                       |                                        |
|              | $c^{(AFP)} = 50$<br>nM | 10    | 2.366 | 2.359 | 2.316 | 0.005 | 0.015 | 0.023 |                                       | $\tilde{c}^{(AFP)} \approx 22.0333$ nM |
|              |                        | 20    | 2.391 | 2.399 | 2.316 | 0.010 | 0.029 | 0.044 |                                       |                                        |
|              |                        | 30    | 2.443 | 2.436 | 2.316 | 0.015 | 0.043 | 0.062 |                                       |                                        |
|              |                        | 40    | 2.473 | 2.471 | 2.316 | 0.020 | 0.056 | 0.079 |                                       |                                        |
|              |                        | 50    | 2.506 | 2.503 | 2.316 | 0.025 | 0.069 | 0.093 |                                       |                                        |
|              |                        | 60    | 2.540 | 2.533 | 2.316 | 0.029 | 0.081 | 0.106 |                                       |                                        |
|              |                        | 70    | 2.566 | 2.561 | 2.316 | 0.034 | 0.094 | 0.117 |                                       |                                        |
|              |                        | 80    | 2.586 | 2.588 | 2.316 | 0.039 | 0.105 | 0.128 |                                       |                                        |
|              |                        | 90    | 2.640 | 2.613 | 2.316 | 0.043 | 0.117 | 0.137 |                                       |                                        |
|              |                        | 100   | 2.665 | 2.636 | 2.316 | 0.047 | 0.128 | 0.145 |                                       |                                        |
|              | $c^{(PTH)} = 2$<br>nM  | 110   | 2.676 | 2.658 | 2.316 | 0.052 | 0.139 | 0.152 |                                       | $\tilde{c}^{(PTH)} \approx 9.2309$ nM  |
|              |                        | 120   | 2.696 | 2.679 | 2.316 | 0.056 | 0.149 | 0.158 |                                       |                                        |
|              |                        | 130   | 2.718 | 2.699 | 2.316 | 0.060 | 0.159 | 0.164 |                                       |                                        |
|              |                        | 140   | 2.767 | 2.718 | 2.316 | 0.064 | 0.169 | 0.169 |                                       |                                        |
|              |                        | 150   | 2.747 | 2.736 | 2.316 | 0.068 | 0.179 | 0.173 |                                       |                                        |
|              |                        | 160   | 2.772 | 2.753 | 2.316 | 0.072 | 0.188 | 0.177 |                                       |                                        |
|              |                        | 170   | 2.765 | 2.770 | 2.316 | 0.076 | 0.197 | 0.181 |                                       |                                        |
|              |                        | 180   | 2.786 | 2.785 | 2.316 | 0.080 | 0.205 | 0.184 |                                       |                                        |
|              |                        | 190   | 2.818 | 2.800 | 2.316 | 0.084 | 0.214 | 0.187 |                                       |                                        |
|              |                        | 200   | 2.818 | 2.814 | 2.316 | 0.087 | 0.222 | 0.189 |                                       |                                        |
|              |                        | 210   | 2.795 | 2.828 | 2.316 | 0.091 | 0.230 | 0.191 |                                       |                                        |
|              |                        | 220   | 2.873 | 2.841 | 2.316 | 0.094 | 0.238 | 0.193 |                                       |                                        |
|              |                        | 230   | 2.886 | 2.854 | 2.316 | 0.098 | 0.245 | 0.195 |                                       |                                        |
|              |                        | 240   | 2.872 | 2.866 | 2.316 | 0.101 | 0.252 | 0.197 |                                       |                                        |
| 250          |                        | 2.871 | 2.878 | 2.316 | 0.105 | 0.259 | 0.198 |       |                                       |                                        |
| 260          | 2.900                  | 2.889 | 2.316 | 0.108 | 0.266 | 0.199 |       |       |                                       |                                        |
| 270          | 2.928                  | 2.900 | 2.316 | 0.111 | 0.273 | 0.200 |       |       |                                       |                                        |
| 280          | 2.932                  | 2.911 | 2.316 | 0.114 | 0.279 | 0.201 |       |       |                                       |                                        |
| 290          | 2.952                  | 2.921 | 2.316 | 0.118 | 0.285 | 0.202 |       |       |                                       |                                        |
| 300          | 2.946                  | 2.931 | 2.316 | 0.121 | 0.291 | 0.203 |       |       |                                       |                                        |

|              |                        |       |       |       |       |       |       |       |                                           |
|--------------|------------------------|-------|-------|-------|-------|-------|-------|-------|-------------------------------------------|
|              |                        | 310   | 2.955 | 2.940 | 2.316 | 0.124 | 0.297 | 0.203 |                                           |
|              |                        | 320   | 2.956 | 2.950 | 2.316 | 0.127 | 0.303 | 0.204 |                                           |
|              |                        | 330   | 2.972 | 2.959 | 2.316 | 0.130 | 0.308 | 0.205 |                                           |
|              |                        | 340   | 2.980 | 2.967 | 2.316 | 0.133 | 0.314 | 0.205 |                                           |
|              |                        | 350   | 2.975 | 2.976 | 2.316 | 0.135 | 0.319 | 0.205 |                                           |
|              |                        | 360   | 2.999 | 2.984 | 2.316 | 0.138 | 0.324 | 0.206 |                                           |
|              |                        | 370   | 2.993 | 2.992 | 2.316 | 0.141 | 0.329 | 0.206 |                                           |
|              |                        | 380   | 3.006 | 2.999 | 2.316 | 0.144 | 0.333 | 0.206 |                                           |
|              |                        | 390   | 3.025 | 3.007 | 2.316 | 0.146 | 0.338 | 0.207 |                                           |
|              |                        | 400   | 3.027 | 3.014 | 2.316 | 0.149 | 0.342 | 0.207 |                                           |
|              |                        | 410   | 3.026 | 3.021 | 2.316 | 0.151 | 0.346 | 0.207 |                                           |
|              |                        | 420   | 3.030 | 3.028 | 2.316 | 0.154 | 0.351 | 0.207 |                                           |
|              |                        | 430   | 3.051 | 3.035 | 2.316 | 0.156 | 0.355 | 0.208 |                                           |
|              |                        | 440   | 3.051 | 3.041 | 2.316 | 0.159 | 0.359 | 0.208 |                                           |
|              |                        | 450   | 3.040 | 3.048 | 2.316 | 0.161 | 0.362 | 0.208 |                                           |
|              |                        | 460   | 3.053 | 3.054 | 2.316 | 0.164 | 0.366 | 0.208 |                                           |
|              |                        | 470   | 3.069 | 3.060 | 2.316 | 0.166 | 0.370 | 0.208 |                                           |
|              |                        | 480   | 3.071 | 3.066 | 2.316 | 0.168 | 0.373 | 0.208 |                                           |
|              |                        | 490   | 3.069 | 3.071 | 2.316 | 0.170 | 0.376 | 0.208 |                                           |
|              |                        | 500   | 3.086 | 3.077 | 2.316 | 0.173 | 0.380 | 0.208 |                                           |
|              |                        | 510   | 3.100 | 3.082 | 2.316 | 0.175 | 0.383 | 0.208 |                                           |
|              |                        | 520   | 3.112 | 3.087 | 2.316 | 0.177 | 0.386 | 0.208 |                                           |
|              |                        | 530   | 3.095 | 3.092 | 2.316 | 0.179 | 0.389 | 0.208 |                                           |
|              |                        | 540   | 3.112 | 3.097 | 2.316 | 0.181 | 0.392 | 0.208 |                                           |
|              |                        | 550   | 3.113 | 3.102 | 2.316 | 0.183 | 0.395 | 0.209 |                                           |
|              |                        | 560   | 3.115 | 3.107 | 2.316 | 0.185 | 0.397 | 0.209 |                                           |
|              |                        | 570   | 3.138 | 3.112 | 2.316 | 0.187 | 0.400 | 0.209 |                                           |
|              |                        | 580   | 3.110 | 3.116 | 2.316 | 0.189 | 0.402 | 0.209 |                                           |
|              |                        | 590   | 3.149 | 3.120 | 2.316 | 0.191 | 0.405 | 0.209 |                                           |
|              |                        | 600   | 3.142 | 3.125 | 2.316 | 0.193 | 0.407 | 0.209 |                                           |
| GFET<br>#S26 | $c^{(CEA)} = 5$<br>nM  | -50   | 2.314 | 2.320 | -     | -     | -     | -     | $\tilde{c}^{(CEA)} \approx$<br>4.8072 nM  |
|              |                        | -40   | 2.336 | 2.320 |       |       |       |       |                                           |
|              |                        | -30   | 2.309 | 2.320 |       |       |       |       |                                           |
|              |                        | -20   | 2.301 | 2.320 |       |       |       |       |                                           |
|              |                        | -10   | 2.338 | 2.320 |       |       |       |       |                                           |
|              | 0                      | 2.339 | 2.320 | 2.320 | 0.000 | 0.000 | 0.000 |       |                                           |
|              | $c^{(AFP)} = 50$<br>nM | 10    | 2.377 | 2.375 | 2.320 | 0.006 | 0.014 | 0.034 | $\tilde{c}^{(AFP)} \approx$<br>21.9864 nM |
|              |                        | 20    | 2.442 | 2.423 | 2.320 | 0.013 | 0.028 | 0.062 |                                           |
|              |                        | 30    | 2.467 | 2.466 | 2.320 | 0.019 | 0.042 | 0.085 |                                           |
|              | $c^{(PTH)} = 5$<br>nM  | 40    | 2.514 | 2.504 | 2.320 | 0.025 | 0.055 | 0.104 | $\tilde{c}^{(PTH)} \approx$<br>16.1345 nM |
|              |                        | 50    | 2.534 | 2.538 | 2.320 | 0.031 | 0.067 | 0.120 |                                           |
|              |                        | 60    | 2.567 | 2.569 | 2.320 | 0.036 | 0.079 | 0.133 |                                           |
|              |                        | 70    | 2.619 | 2.598 | 2.320 | 0.042 | 0.091 | 0.144 |                                           |
|              |                        | 80    | 2.641 | 2.624 | 2.320 | 0.048 | 0.103 | 0.153 |                                           |
| 90           |                        | 2.658 | 2.648 | 2.320 | 0.053 | 0.114 | 0.161 |       |                                           |
| 100          |                        | 2.677 | 2.670 | 2.320 | 0.058 | 0.125 | 0.167 |       |                                           |

|     |       |       |       |       |       |       |
|-----|-------|-------|-------|-------|-------|-------|
| 110 | 2.693 | 2.691 | 2.320 | 0.064 | 0.135 | 0.172 |
| 120 | 2.720 | 2.711 | 2.320 | 0.069 | 0.146 | 0.176 |
| 130 | 2.737 | 2.729 | 2.320 | 0.074 | 0.155 | 0.180 |
| 140 | 2.761 | 2.747 | 2.320 | 0.079 | 0.165 | 0.183 |
| 150 | 2.769 | 2.763 | 2.320 | 0.083 | 0.174 | 0.185 |
| 160 | 2.782 | 2.779 | 2.320 | 0.088 | 0.183 | 0.187 |
| 170 | 2.799 | 2.794 | 2.320 | 0.093 | 0.192 | 0.189 |
| 180 | 2.808 | 2.808 | 2.320 | 0.097 | 0.201 | 0.190 |
| 190 | 2.823 | 2.822 | 2.320 | 0.102 | 0.209 | 0.191 |
| 200 | 2.832 | 2.835 | 2.320 | 0.106 | 0.217 | 0.192 |
| 210 | 2.839 | 2.848 | 2.320 | 0.110 | 0.224 | 0.193 |
| 220 | 2.869 | 2.860 | 2.320 | 0.115 | 0.232 | 0.193 |
| 230 | 2.862 | 2.872 | 2.320 | 0.119 | 0.239 | 0.194 |
| 240 | 2.909 | 2.884 | 2.320 | 0.123 | 0.246 | 0.194 |
| 250 | 2.895 | 2.895 | 2.320 | 0.127 | 0.253 | 0.195 |
| 260 | 2.921 | 2.906 | 2.320 | 0.130 | 0.260 | 0.195 |
| 270 | 2.938 | 2.916 | 2.320 | 0.134 | 0.266 | 0.195 |
| 280 | 2.916 | 2.926 | 2.320 | 0.138 | 0.272 | 0.196 |
| 290 | 2.929 | 2.936 | 2.320 | 0.142 | 0.278 | 0.196 |
| 300 | 2.954 | 2.946 | 2.320 | 0.145 | 0.284 | 0.196 |
| 310 | 2.972 | 2.955 | 2.320 | 0.149 | 0.290 | 0.196 |
| 320 | 2.977 | 2.964 | 2.320 | 0.152 | 0.296 | 0.196 |
| 330 | 2.979 | 2.973 | 2.320 | 0.155 | 0.301 | 0.196 |
| 340 | 2.982 | 2.981 | 2.320 | 0.159 | 0.306 | 0.196 |
| 350 | 3.013 | 2.990 | 2.320 | 0.162 | 0.311 | 0.196 |
| 360 | 3.016 | 2.998 | 2.320 | 0.165 | 0.316 | 0.196 |
| 370 | 3.002 | 3.006 | 2.320 | 0.168 | 0.321 | 0.196 |
| 380 | 3.009 | 3.013 | 2.320 | 0.171 | 0.325 | 0.196 |
| 390 | 3.010 | 3.021 | 2.320 | 0.174 | 0.330 | 0.196 |
| 400 | 3.046 | 3.028 | 2.320 | 0.177 | 0.334 | 0.196 |
| 410 | 3.029 | 3.035 | 2.320 | 0.180 | 0.338 | 0.196 |
| 420 | 3.056 | 3.042 | 2.320 | 0.183 | 0.342 | 0.197 |
| 430 | 3.039 | 3.049 | 2.320 | 0.185 | 0.346 | 0.197 |
| 440 | 3.076 | 3.055 | 2.320 | 0.188 | 0.350 | 0.197 |
| 450 | 3.080 | 3.061 | 2.320 | 0.191 | 0.354 | 0.197 |
| 460 | 3.072 | 3.068 | 2.320 | 0.193 | 0.358 | 0.197 |
| 470 | 3.094 | 3.074 | 2.320 | 0.196 | 0.361 | 0.197 |
| 480 | 3.076 | 3.079 | 2.320 | 0.198 | 0.364 | 0.197 |
| 490 | 3.082 | 3.085 | 2.320 | 0.201 | 0.368 | 0.197 |
| 500 | 3.105 | 3.091 | 2.320 | 0.203 | 0.371 | 0.197 |
| 510 | 3.084 | 3.096 | 2.320 | 0.205 | 0.374 | 0.197 |
| 520 | 3.124 | 3.101 | 2.320 | 0.208 | 0.377 | 0.197 |
| 530 | 3.090 | 3.107 | 2.320 | 0.210 | 0.380 | 0.197 |
| 540 | 3.118 | 3.112 | 2.320 | 0.212 | 0.383 | 0.197 |
| 550 | 3.111 | 3.116 | 2.320 | 0.214 | 0.385 | 0.197 |
| 560 | 3.130 | 3.121 | 2.320 | 0.216 | 0.388 | 0.197 |

|              |                        |       |       |       |       |       |       |                                        |                                       |
|--------------|------------------------|-------|-------|-------|-------|-------|-------|----------------------------------------|---------------------------------------|
|              |                        | 570   | 3.150 | 3.126 | 2.320 | 0.218 | 0.391 | 0.197                                  |                                       |
|              |                        | 580   | 3.130 | 3.130 | 2.320 | 0.220 | 0.393 | 0.197                                  |                                       |
|              |                        | 590   | 3.151 | 3.135 | 2.320 | 0.222 | 0.396 | 0.197                                  |                                       |
|              |                        | 600   | 3.166 | 3.139 | 2.320 | 0.224 | 0.398 | 0.197                                  |                                       |
| GFET<br>#S27 | $c^{(CEA)} = 5$<br>nM  | -50   | 2.306 | 2.290 | -     | -     | -     | -                                      | $\tilde{c}^{(CEA)} \approx 3.7015$ nM |
|              |                        | -40   | 2.291 | 2.290 |       |       |       |                                        |                                       |
|              |                        | -30   | 2.286 | 2.290 |       |       |       |                                        |                                       |
|              |                        | -20   | 2.315 | 2.290 |       |       |       |                                        |                                       |
|              |                        | -10   | 2.299 | 2.290 |       |       |       |                                        |                                       |
|              |                        | 0     | 2.294 | 2.290 | 2.290 | 0.000 | 0.000 | 0.000                                  |                                       |
|              |                        | 10    | 2.401 | 2.409 | 2.290 | 0.005 | 0.016 | 0.099                                  |                                       |
|              |                        | 20    | 2.503 | 2.488 | 2.290 | 0.009 | 0.032 | 0.157                                  |                                       |
|              |                        | 30    | 2.540 | 2.543 | 2.290 | 0.014 | 0.047 | 0.192                                  |                                       |
|              |                        | 40    | 2.589 | 2.583 | 2.290 | 0.018 | 0.062 | 0.213                                  |                                       |
|              |                        | 50    | 2.632 | 2.614 | 2.290 | 0.023 | 0.076 | 0.225                                  |                                       |
|              |                        | 60    | 2.663 | 2.639 | 2.290 | 0.027 | 0.090 | 0.233                                  |                                       |
|              |                        | 70    | 2.684 | 2.661 | 2.290 | 0.031 | 0.103 | 0.237                                  |                                       |
|              |                        | 80    | 2.680 | 2.681 | 2.290 | 0.036 | 0.116 | 0.239                                  |                                       |
|              |                        | 90    | 2.692 | 2.699 | 2.290 | 0.040 | 0.129 | 0.241                                  |                                       |
|              |                        | 100   | 2.743 | 2.716 | 2.290 | 0.044 | 0.141 | 0.242                                  |                                       |
|              |                        | 110   | 2.730 | 2.732 | 2.290 | 0.048 | 0.152 | 0.243                                  |                                       |
|              |                        | 120   | 2.742 | 2.748 | 2.290 | 0.052 | 0.164 | 0.243                                  |                                       |
|              |                        | 130   | 2.762 | 2.763 | 2.290 | 0.056 | 0.175 | 0.243                                  |                                       |
|              |                        | 140   | 2.792 | 2.778 | 2.290 | 0.059 | 0.185 | 0.243                                  |                                       |
|              |                        | 150   | 2.809 | 2.792 | 2.290 | 0.063 | 0.195 | 0.243                                  |                                       |
|              |                        | 160   | 2.798 | 2.805 | 2.290 | 0.067 | 0.205 | 0.243                                  |                                       |
|              |                        | 170   | 2.822 | 2.818 | 2.290 | 0.070 | 0.215 | 0.243                                  |                                       |
|              |                        | 180   | 2.832 | 2.831 | 2.290 | 0.074 | 0.224 | 0.243                                  |                                       |
|              |                        | 190   | 2.873 | 2.844 | 2.290 | 0.078 | 0.233 | 0.243                                  |                                       |
|              |                        | 200   | 2.841 | 2.856 | 2.290 | 0.081 | 0.242 | 0.243                                  |                                       |
|              |                        | 210   | 2.875 | 2.868 | 2.290 | 0.084 | 0.250 | 0.243                                  |                                       |
|              |                        | 220   | 2.853 | 2.879 | 2.290 | 0.088 | 0.258 | 0.243                                  |                                       |
|              |                        | 230   | 2.906 | 2.890 | 2.290 | 0.091 | 0.266 | 0.243                                  |                                       |
|              |                        | 240   | 2.891 | 2.901 | 2.290 | 0.094 | 0.274 | 0.243                                  |                                       |
|              |                        | 250   | 2.898 | 2.912 | 2.290 | 0.097 | 0.281 | 0.243                                  |                                       |
|              |                        | 260   | 2.917 | 2.922 | 2.290 | 0.101 | 0.288 | 0.243                                  |                                       |
|              |                        | 270   | 2.920 | 2.932 | 2.290 | 0.104 | 0.295 | 0.243                                  |                                       |
|              |                        | 280   | 2.967 | 2.942 | 2.290 | 0.107 | 0.302 | 0.243                                  |                                       |
|              |                        | 290   | 2.931 | 2.951 | 2.290 | 0.110 | 0.308 | 0.243                                  |                                       |
|              |                        | 300   | 2.949 | 2.960 | 2.290 | 0.113 | 0.315 | 0.243                                  |                                       |
| 310          | 2.976                  | 2.969 | 2.290 | 0.115 | 0.321 | 0.243 |       |                                        |                                       |
| 320          | 2.983                  | 2.978 | 2.290 | 0.118 | 0.327 | 0.243 |       |                                        |                                       |
| 330          | 2.961                  | 2.986 | 2.290 | 0.121 | 0.332 | 0.243 |       |                                        |                                       |
| 340          | 2.974                  | 2.995 | 2.290 | 0.124 | 0.338 | 0.243 |       |                                        |                                       |
| 350          | 2.997                  | 3.003 | 2.290 | 0.127 | 0.343 | 0.243 |       |                                        |                                       |
| 360          | 3.018                  | 3.010 | 2.290 | 0.129 | 0.348 | 0.243 |       |                                        |                                       |
|              | $c^{(AFP)} = 50$<br>nM |       |       |       |       |       |       | $\tilde{c}^{(AFP)} \approx 24.3235$ nM |                                       |
|              | $c^{(PTH)} = 20$<br>nM |       |       |       |       |       |       | $\tilde{c}^{(PTH)} \approx 48.5294$ nM |                                       |



|              |                        |       |       |       |       |       |       |       |                                          |                                           |
|--------------|------------------------|-------|-------|-------|-------|-------|-------|-------|------------------------------------------|-------------------------------------------|
|              |                        | 370   | 3.025 | 3.018 | 2.290 | 0.132 | 0.353 | 0.243 |                                          |                                           |
|              |                        | 380   | 3.031 | 3.025 | 2.290 | 0.134 | 0.358 | 0.243 |                                          |                                           |
|              |                        | 390   | 3.022 | 3.033 | 2.290 | 0.137 | 0.363 | 0.243 |                                          |                                           |
|              |                        | 400   | 3.052 | 3.040 | 2.290 | 0.139 | 0.367 | 0.243 |                                          |                                           |
|              |                        | 410   | 3.048 | 3.046 | 2.290 | 0.142 | 0.371 | 0.243 |                                          |                                           |
|              |                        | 420   | 3.087 | 3.053 | 2.290 | 0.144 | 0.376 | 0.243 |                                          |                                           |
|              |                        | 430   | 3.045 | 3.059 | 2.290 | 0.147 | 0.380 | 0.243 |                                          |                                           |
|              |                        | 440   | 3.044 | 3.066 | 2.290 | 0.149 | 0.384 | 0.243 |                                          |                                           |
|              |                        | 450   | 3.076 | 3.072 | 2.290 | 0.151 | 0.387 | 0.243 |                                          |                                           |
|              |                        | 460   | 3.076 | 3.078 | 2.290 | 0.154 | 0.391 | 0.243 |                                          |                                           |
|              |                        | 470   | 3.088 | 3.084 | 2.290 | 0.156 | 0.395 | 0.243 |                                          |                                           |
|              |                        | 480   | 3.107 | 3.089 | 2.290 | 0.158 | 0.398 | 0.243 |                                          |                                           |
|              |                        | 490   | 3.118 | 3.095 | 2.290 | 0.160 | 0.401 | 0.243 |                                          |                                           |
|              |                        | 500   | 3.103 | 3.100 | 2.290 | 0.162 | 0.405 | 0.243 |                                          |                                           |
|              |                        | 510   | 3.112 | 3.105 | 2.290 | 0.164 | 0.408 | 0.243 |                                          |                                           |
|              |                        | 520   | 3.128 | 3.110 | 2.290 | 0.166 | 0.411 | 0.243 |                                          |                                           |
|              |                        | 530   | 3.125 | 3.115 | 2.290 | 0.168 | 0.414 | 0.243 |                                          |                                           |
|              |                        | 540   | 3.135 | 3.120 | 2.290 | 0.170 | 0.417 | 0.243 |                                          |                                           |
|              |                        | 550   | 3.098 | 3.125 | 2.290 | 0.172 | 0.419 | 0.243 |                                          |                                           |
|              |                        | 560   | 3.155 | 3.129 | 2.290 | 0.174 | 0.422 | 0.243 |                                          |                                           |
|              |                        | 570   | 3.142 | 3.134 | 2.290 | 0.176 | 0.425 | 0.243 |                                          |                                           |
|              |                        | 580   | 3.127 | 3.138 | 2.290 | 0.178 | 0.427 | 0.243 |                                          |                                           |
|              |                        | 590   | 3.161 | 3.142 | 2.290 | 0.180 | 0.429 | 0.243 |                                          |                                           |
|              |                        | 600   | 3.131 | 3.147 | 2.290 | 0.182 | 0.432 | 0.243 |                                          |                                           |
| GFET<br>#S28 | $c^{(CEA)} = 5$<br>nM  | -50   | 2.322 | 2.317 | -     | -     | -     | -     | $\tilde{c}^{(CEA)} \approx$<br>3.4412 nM |                                           |
|              |                        | -40   | 2.331 | 2.317 |       |       |       |       |                                          |                                           |
|              |                        | -30   | 2.322 | 2.317 |       |       |       |       |                                          |                                           |
|              |                        | -20   | 2.313 | 2.317 |       |       |       |       |                                          |                                           |
|              |                        | -10   | 2.312 | 2.317 |       |       |       |       |                                          |                                           |
|              | 0                      | 2.311 | 2.317 | 2.317 | 0.000 | 0.000 | 0.000 |       |                                          |                                           |
|              | 10                     | 2.485 | 2.468 | 2.317 | 0.005 | 0.017 | 0.129 |       |                                          |                                           |
|              | 20                     | 2.530 | 2.537 | 2.317 | 0.009 | 0.033 | 0.177 |       |                                          |                                           |
|              | 30                     | 2.600 | 2.575 | 2.317 | 0.014 | 0.049 | 0.195 |       |                                          |                                           |
|              | 40                     | 2.597 | 2.602 | 2.317 | 0.018 | 0.064 | 0.202 |       |                                          |                                           |
|              | $c^{(AFP)} = 50$<br>nM | 50    | 2.634 | 2.623 | 2.317 | 0.023 | 0.079 | 0.204 |                                          | $\tilde{c}^{(AFP)} \approx$<br>23.8761 nM |
|              |                        | 60    | 2.632 | 2.643 | 2.317 | 0.027 | 0.093 | 0.205 |                                          |                                           |
|              | $c^{(PTH)} = 50$<br>nM | 70    | 2.671 | 2.661 | 2.317 | 0.031 | 0.107 | 0.206 |                                          | $\tilde{c}^{(PTH)} \approx$<br>94.6613 nM |
|              |                        | 80    | 2.693 | 2.679 | 2.317 | 0.036 | 0.120 | 0.206 |                                          |                                           |
|              |                        | 90    | 2.711 | 2.696 | 2.317 | 0.040 | 0.133 | 0.206 |                                          |                                           |
|              |                        | 100   | 2.716 | 2.713 | 2.317 | 0.044 | 0.146 | 0.206 |                                          |                                           |
|              |                        | 110   | 2.728 | 2.729 | 2.317 | 0.048 | 0.158 | 0.206 |                                          |                                           |
|              |                        | 120   | 2.771 | 2.745 | 2.317 | 0.052 | 0.170 | 0.206 |                                          |                                           |
|              |                        | 130   | 2.753 | 2.760 | 2.317 | 0.056 | 0.181 | 0.206 |                                          |                                           |
|              |                        | 140   | 2.770 | 2.775 | 2.317 | 0.060 | 0.192 | 0.206 |                                          |                                           |
| 150          | 2.805                  | 2.790 | 2.317 | 0.064 | 0.203 | 0.206 |       |       |                                          |                                           |
| 160          | 2.826                  | 2.804 | 2.317 | 0.067 | 0.213 | 0.206 |       |       |                                          |                                           |

|              |                       |     |       |       |       |       |       |       |                                          |
|--------------|-----------------------|-----|-------|-------|-------|-------|-------|-------|------------------------------------------|
|              |                       | 170 | 2.806 | 2.817 | 2.317 | 0.071 | 0.223 | 0.206 |                                          |
|              |                       | 180 | 2.857 | 2.831 | 2.317 | 0.075 | 0.233 | 0.206 |                                          |
|              |                       | 190 | 2.853 | 2.844 | 2.317 | 0.078 | 0.242 | 0.206 |                                          |
|              |                       | 200 | 2.895 | 2.856 | 2.317 | 0.082 | 0.251 | 0.206 |                                          |
|              |                       | 210 | 2.871 | 2.868 | 2.317 | 0.085 | 0.260 | 0.206 |                                          |
|              |                       | 220 | 2.885 | 2.880 | 2.317 | 0.089 | 0.269 | 0.206 |                                          |
|              |                       | 230 | 2.883 | 2.892 | 2.317 | 0.092 | 0.277 | 0.206 |                                          |
|              |                       | 240 | 2.895 | 2.903 | 2.317 | 0.095 | 0.285 | 0.206 |                                          |
|              |                       | 250 | 2.924 | 2.914 | 2.317 | 0.098 | 0.293 | 0.206 |                                          |
|              |                       | 260 | 2.943 | 2.925 | 2.317 | 0.102 | 0.300 | 0.206 |                                          |
|              |                       | 270 | 2.940 | 2.935 | 2.317 | 0.105 | 0.307 | 0.206 |                                          |
|              |                       | 280 | 2.981 | 2.945 | 2.317 | 0.108 | 0.314 | 0.206 |                                          |
|              |                       | 290 | 2.957 | 2.955 | 2.317 | 0.111 | 0.321 | 0.206 |                                          |
|              |                       | 300 | 2.954 | 2.965 | 2.317 | 0.114 | 0.328 | 0.206 |                                          |
|              |                       | 310 | 2.972 | 2.974 | 2.317 | 0.117 | 0.334 | 0.206 |                                          |
|              |                       | 320 | 2.970 | 2.983 | 2.317 | 0.120 | 0.340 | 0.206 |                                          |
|              |                       | 330 | 2.993 | 2.992 | 2.317 | 0.123 | 0.346 | 0.206 |                                          |
|              |                       | 340 | 2.999 | 3.000 | 2.317 | 0.126 | 0.352 | 0.206 |                                          |
|              |                       | 350 | 3.003 | 3.009 | 2.317 | 0.128 | 0.357 | 0.206 |                                          |
|              |                       | 360 | 3.042 | 3.017 | 2.317 | 0.131 | 0.363 | 0.206 |                                          |
|              |                       | 370 | 3.027 | 3.025 | 2.317 | 0.134 | 0.368 | 0.206 |                                          |
|              |                       | 380 | 3.040 | 3.033 | 2.317 | 0.136 | 0.373 | 0.206 |                                          |
|              |                       | 390 | 3.037 | 3.040 | 2.317 | 0.139 | 0.378 | 0.206 |                                          |
|              |                       | 400 | 3.059 | 3.047 | 2.317 | 0.142 | 0.383 | 0.206 |                                          |
|              |                       | 410 | 3.058 | 3.055 | 2.317 | 0.144 | 0.387 | 0.206 |                                          |
|              |                       | 420 | 3.051 | 3.062 | 2.317 | 0.147 | 0.392 | 0.206 |                                          |
|              |                       | 430 | 3.046 | 3.068 | 2.317 | 0.149 | 0.396 | 0.206 |                                          |
|              |                       | 440 | 3.068 | 3.075 | 2.317 | 0.152 | 0.400 | 0.206 |                                          |
|              |                       | 450 | 3.084 | 3.081 | 2.317 | 0.154 | 0.404 | 0.206 |                                          |
|              |                       | 460 | 3.094 | 3.088 | 2.317 | 0.156 | 0.408 | 0.206 |                                          |
|              |                       | 470 | 3.113 | 3.094 | 2.317 | 0.159 | 0.412 | 0.206 |                                          |
|              |                       | 480 | 3.108 | 3.100 | 2.317 | 0.161 | 0.416 | 0.206 |                                          |
|              |                       | 490 | 3.105 | 3.105 | 2.317 | 0.163 | 0.419 | 0.206 |                                          |
|              |                       | 500 | 3.105 | 3.111 | 2.317 | 0.165 | 0.423 | 0.206 |                                          |
|              |                       | 510 | 3.112 | 3.117 | 2.317 | 0.168 | 0.426 | 0.206 |                                          |
|              |                       | 520 | 3.129 | 3.122 | 2.317 | 0.170 | 0.429 | 0.206 |                                          |
|              |                       | 530 | 3.121 | 3.127 | 2.317 | 0.172 | 0.432 | 0.206 |                                          |
|              |                       | 540 | 3.131 | 3.132 | 2.317 | 0.174 | 0.435 | 0.206 |                                          |
|              |                       | 550 | 3.146 | 3.137 | 2.317 | 0.176 | 0.438 | 0.206 |                                          |
|              |                       | 560 | 3.154 | 3.142 | 2.317 | 0.178 | 0.441 | 0.206 |                                          |
|              |                       | 570 | 3.163 | 3.147 | 2.317 | 0.180 | 0.444 | 0.206 |                                          |
|              |                       | 580 | 3.128 | 3.151 | 2.317 | 0.182 | 0.446 | 0.206 |                                          |
|              |                       | 590 | 3.163 | 3.156 | 2.317 | 0.184 | 0.449 | 0.206 |                                          |
|              |                       | 600 | 3.187 | 3.160 | 2.317 | 0.186 | 0.451 | 0.206 |                                          |
| GFET<br>#S29 | $c^{(CEA)} = 5$<br>nM | -50 | 2.313 | 2.314 | -     | -     | -     | -     | $\tilde{c}^{(CEA)} \approx$<br>3.5123 nM |
|              |                       | -40 | 2.346 | 2.314 |       |       |       |       |                                          |

|                              |       |       |       |       |       |       |       |                                              |
|------------------------------|-------|-------|-------|-------|-------|-------|-------|----------------------------------------------|
| $c^{(AFP)} = 100 \text{ nM}$ | -30   | 2.348 | 2.314 |       |       |       |       | $\bar{c}^{(AFP)} \approx 48.6123 \text{ nM}$ |
|                              | -20   | 2.339 | 2.314 |       |       |       |       |                                              |
|                              | -10   | 2.310 | 2.314 |       |       |       |       |                                              |
| $c^{(PTH)} = 2 \text{ nM}$   | 0     | 2.332 | 2.314 | 2.314 | 0.000 | 0.000 | 0.000 | $\bar{c}^{(PTH)} \approx 3.7634 \text{ nM}$  |
|                              | 10    | 2.369 | 2.360 | 2.314 | 0.005 | 0.034 | 0.008 |                                              |
|                              | 20    | 2.407 | 2.404 | 2.314 | 0.009 | 0.065 | 0.015 |                                              |
|                              | 30    | 2.448 | 2.445 | 2.314 | 0.014 | 0.095 | 0.022 |                                              |
|                              | 40    | 2.497 | 2.484 | 2.314 | 0.018 | 0.124 | 0.029 |                                              |
|                              | 50    | 2.529 | 2.522 | 2.314 | 0.022 | 0.150 | 0.035 |                                              |
|                              | 60    | 2.565 | 2.557 | 2.314 | 0.026 | 0.175 | 0.041 |                                              |
|                              | 70    | 2.574 | 2.590 | 2.314 | 0.031 | 0.199 | 0.046 |                                              |
|                              | 80    | 2.653 | 2.622 | 2.314 | 0.035 | 0.222 | 0.051 |                                              |
|                              | 90    | 2.679 | 2.652 | 2.314 | 0.039 | 0.243 | 0.056 |                                              |
|                              | 100   | 2.693 | 2.681 | 2.314 | 0.043 | 0.263 | 0.060 |                                              |
|                              | 110   | 2.715 | 2.708 | 2.314 | 0.047 | 0.282 | 0.064 |                                              |
|                              | 120   | 2.729 | 2.733 | 2.314 | 0.050 | 0.300 | 0.068 |                                              |
|                              | 130   | 2.761 | 2.758 | 2.314 | 0.054 | 0.317 | 0.072 |                                              |
|                              | 140   | 2.797 | 2.781 | 2.314 | 0.058 | 0.333 | 0.076 |                                              |
|                              | 150   | 2.842 | 2.803 | 2.314 | 0.062 | 0.348 | 0.079 |                                              |
|                              | 160   | 2.812 | 2.824 | 2.314 | 0.065 | 0.362 | 0.082 |                                              |
|                              | 170   | 2.861 | 2.844 | 2.314 | 0.069 | 0.376 | 0.085 |                                              |
|                              | 180   | 2.872 | 2.863 | 2.314 | 0.072 | 0.388 | 0.088 |                                              |
|                              | 190   | 2.893 | 2.881 | 2.314 | 0.076 | 0.401 | 0.090 |                                              |
|                              | 200   | 2.901 | 2.898 | 2.314 | 0.079 | 0.412 | 0.093 |                                              |
|                              | 210   | 2.913 | 2.914 | 2.314 | 0.083 | 0.423 | 0.095 |                                              |
|                              | 220   | 2.938 | 2.930 | 2.314 | 0.086 | 0.433 | 0.097 |                                              |
|                              | 230   | 2.956 | 2.945 | 2.314 | 0.089 | 0.442 | 0.099 |                                              |
|                              | 240   | 2.954 | 2.959 | 2.314 | 0.092 | 0.451 | 0.101 |                                              |
|                              | 250   | 2.952 | 2.972 | 2.314 | 0.096 | 0.460 | 0.103 |                                              |
|                              | 260   | 2.996 | 2.985 | 2.314 | 0.099 | 0.468 | 0.104 |                                              |
|                              | 270   | 2.997 | 2.997 | 2.314 | 0.102 | 0.475 | 0.106 |                                              |
|                              | 280   | 2.995 | 3.009 | 2.314 | 0.105 | 0.483 | 0.107 |                                              |
|                              | 290   | 3.024 | 3.020 | 2.314 | 0.108 | 0.489 | 0.109 |                                              |
|                              | 300   | 3.034 | 3.031 | 2.314 | 0.111 | 0.496 | 0.110 |                                              |
|                              | 310   | 3.036 | 3.041 | 2.314 | 0.113 | 0.502 | 0.111 |                                              |
|                              | 320   | 3.056 | 3.051 | 2.314 | 0.116 | 0.508 | 0.112 |                                              |
|                              | 330   | 3.073 | 3.060 | 2.314 | 0.119 | 0.513 | 0.113 |                                              |
|                              | 340   | 3.073 | 3.069 | 2.314 | 0.122 | 0.518 | 0.114 |                                              |
|                              | 350   | 3.078 | 3.077 | 2.314 | 0.124 | 0.523 | 0.115 |                                              |
|                              | 360   | 3.106 | 3.085 | 2.314 | 0.127 | 0.527 | 0.116 |                                              |
|                              | 370   | 3.118 | 3.093 | 2.314 | 0.130 | 0.532 | 0.117 |                                              |
|                              | 380   | 3.123 | 3.100 | 2.314 | 0.132 | 0.536 | 0.118 |                                              |
|                              | 390   | 3.091 | 3.107 | 2.314 | 0.135 | 0.540 | 0.119 |                                              |
| 400                          | 3.127 | 3.114 | 2.314 | 0.137 | 0.543 | 0.119 |       |                                              |
| 410                          | 3.129 | 3.121 | 2.314 | 0.140 | 0.547 | 0.120 |       |                                              |
| 420                          | 3.135 | 3.127 | 2.314 | 0.142 | 0.550 | 0.121 |       |                                              |

|              |                                                                           |       |       |       |       |       |       |       |                                                                                                                           |
|--------------|---------------------------------------------------------------------------|-------|-------|-------|-------|-------|-------|-------|---------------------------------------------------------------------------------------------------------------------------|
|              |                                                                           | 430   | 3.123 | 3.133 | 2.314 | 0.145 | 0.553 | 0.121 |                                                                                                                           |
|              |                                                                           | 440   | 3.157 | 3.139 | 2.314 | 0.147 | 0.556 | 0.122 |                                                                                                                           |
|              |                                                                           | 450   | 3.151 | 3.144 | 2.314 | 0.149 | 0.559 | 0.122 |                                                                                                                           |
|              |                                                                           | 460   | 3.151 | 3.150 | 2.314 | 0.151 | 0.561 | 0.123 |                                                                                                                           |
|              |                                                                           | 470   | 3.171 | 3.155 | 2.314 | 0.154 | 0.564 | 0.123 |                                                                                                                           |
|              |                                                                           | 480   | 3.141 | 3.160 | 2.314 | 0.156 | 0.566 | 0.124 |                                                                                                                           |
|              |                                                                           | 490   | 3.174 | 3.164 | 2.314 | 0.158 | 0.568 | 0.124 |                                                                                                                           |
|              |                                                                           | 500   | 3.162 | 3.169 | 2.314 | 0.160 | 0.570 | 0.124 |                                                                                                                           |
|              |                                                                           | 510   | 3.141 | 3.173 | 2.314 | 0.162 | 0.572 | 0.125 |                                                                                                                           |
|              |                                                                           | 520   | 3.219 | 3.178 | 2.314 | 0.164 | 0.574 | 0.125 |                                                                                                                           |
|              |                                                                           | 530   | 3.188 | 3.182 | 2.314 | 0.166 | 0.576 | 0.125 |                                                                                                                           |
|              |                                                                           | 540   | 3.184 | 3.186 | 2.314 | 0.168 | 0.577 | 0.126 |                                                                                                                           |
|              |                                                                           | 550   | 3.196 | 3.189 | 2.314 | 0.170 | 0.579 | 0.126 |                                                                                                                           |
|              |                                                                           | 560   | 3.197 | 3.193 | 2.314 | 0.172 | 0.580 | 0.126 |                                                                                                                           |
|              |                                                                           | 570   | 3.210 | 3.197 | 2.314 | 0.174 | 0.582 | 0.126 |                                                                                                                           |
|              |                                                                           | 580   | 3.197 | 3.200 | 2.314 | 0.176 | 0.583 | 0.127 |                                                                                                                           |
|              |                                                                           | 590   | 3.226 | 3.203 | 2.314 | 0.178 | 0.584 | 0.127 |                                                                                                                           |
|              |                                                                           | 600   | 3.220 | 3.206 | 2.314 | 0.180 | 0.585 | 0.127 |                                                                                                                           |
| GFET<br>#S30 | $c^{(CEA)} = 5$<br>nM<br>$c^{(AFP)} = 100$<br>nM<br>$c^{(PTH)} = 5$<br>nM | -50   | 2.313 | 2.308 |       |       |       |       | $\tilde{c}^{(CEA)} \approx 3.8006$ nM<br>$\tilde{c}^{(AFP)} \approx 51.4407$ nM<br>$\tilde{c}^{(PTH)} \approx 15.3345$ nM |
|              |                                                                           | -40   | 2.319 | 2.308 |       |       |       |       |                                                                                                                           |
|              |                                                                           | -30   | 2.323 | 2.308 | -     | -     | -     | -     |                                                                                                                           |
|              |                                                                           | -20   | 2.306 | 2.308 |       |       |       |       |                                                                                                                           |
|              |                                                                           | -10   | 2.310 | 2.308 |       |       |       |       |                                                                                                                           |
|              |                                                                           | 0     | 2.304 | 2.308 | 2.308 | 0.000 | 0.000 | 0.000 |                                                                                                                           |
|              |                                                                           | 10    | 2.374 | 2.376 | 2.308 | 0.005 | 0.035 | 0.029 |                                                                                                                           |
|              |                                                                           | 20    | 2.441 | 2.438 | 2.308 | 0.009 | 0.067 | 0.053 |                                                                                                                           |
|              |                                                                           | 30    | 2.509 | 2.493 | 2.308 | 0.014 | 0.098 | 0.074 |                                                                                                                           |
|              |                                                                           | 40    | 2.545 | 2.543 | 2.308 | 0.018 | 0.127 | 0.091 |                                                                                                                           |
|              |                                                                           | 50    | 2.599 | 2.589 | 2.308 | 0.023 | 0.154 | 0.105 |                                                                                                                           |
|              |                                                                           | 60    | 2.626 | 2.631 | 2.308 | 0.027 | 0.179 | 0.117 |                                                                                                                           |
|              |                                                                           | 70    | 2.680 | 2.669 | 2.308 | 0.031 | 0.204 | 0.127 |                                                                                                                           |
|              |                                                                           | 80    | 2.672 | 2.704 | 2.308 | 0.035 | 0.226 | 0.135 |                                                                                                                           |
|              |                                                                           | 90    | 2.747 | 2.737 | 2.308 | 0.039 | 0.248 | 0.142 |                                                                                                                           |
|              |                                                                           | 100   | 2.768 | 2.766 | 2.308 | 0.043 | 0.268 | 0.147 |                                                                                                                           |
|              |                                                                           | 110   | 2.793 | 2.794 | 2.308 | 0.047 | 0.287 | 0.152 |                                                                                                                           |
|              |                                                                           | 120   | 2.820 | 2.820 | 2.308 | 0.051 | 0.305 | 0.156 |                                                                                                                           |
|              |                                                                           | 130   | 2.833 | 2.844 | 2.308 | 0.055 | 0.321 | 0.160 |                                                                                                                           |
|              |                                                                           | 140   | 2.871 | 2.866 | 2.308 | 0.059 | 0.337 | 0.162 |                                                                                                                           |
|              |                                                                           | 150   | 2.902 | 2.887 | 2.308 | 0.063 | 0.352 | 0.165 |                                                                                                                           |
|              |                                                                           | 160   | 2.918 | 2.907 | 2.308 | 0.066 | 0.366 | 0.167 |                                                                                                                           |
|              |                                                                           | 170   | 2.918 | 2.926 | 2.308 | 0.070 | 0.380 | 0.168 |                                                                                                                           |
| 180          | 2.949                                                                     | 2.943 | 2.308 | 0.073 | 0.392 | 0.170 |       |       |                                                                                                                           |
| 190          | 2.936                                                                     | 2.959 | 2.308 | 0.077 | 0.404 | 0.171 |       |       |                                                                                                                           |
| 200          | 2.984                                                                     | 2.975 | 2.308 | 0.080 | 0.415 | 0.172 |       |       |                                                                                                                           |
| 210          | 2.977                                                                     | 2.989 | 2.308 | 0.084 | 0.425 | 0.173 |       |       |                                                                                                                           |
| 220          | 2.999                                                                     | 3.003 | 2.308 | 0.087 | 0.435 | 0.173 |       |       |                                                                                                                           |

|              |                         |       |       |       |       |       |       |       |                                        |
|--------------|-------------------------|-------|-------|-------|-------|-------|-------|-------|----------------------------------------|
|              |                         | 230   | 3.011 | 3.016 | 2.308 | 0.090 | 0.444 | 0.174 |                                        |
|              |                         | 240   | 3.037 | 3.028 | 2.308 | 0.093 | 0.453 | 0.174 |                                        |
|              |                         | 250   | 3.039 | 3.040 | 2.308 | 0.097 | 0.461 | 0.175 |                                        |
|              |                         | 260   | 3.075 | 3.051 | 2.308 | 0.100 | 0.469 | 0.175 |                                        |
|              |                         | 270   | 3.077 | 3.062 | 2.308 | 0.103 | 0.476 | 0.175 |                                        |
|              |                         | 280   | 3.083 | 3.072 | 2.308 | 0.106 | 0.483 | 0.175 |                                        |
|              |                         | 290   | 3.089 | 3.081 | 2.308 | 0.109 | 0.490 | 0.176 |                                        |
|              |                         | 300   | 3.072 | 3.091 | 2.308 | 0.111 | 0.496 | 0.176 |                                        |
|              |                         | 310   | 3.098 | 3.099 | 2.308 | 0.114 | 0.501 | 0.176 |                                        |
|              |                         | 320   | 3.103 | 3.108 | 2.308 | 0.117 | 0.507 | 0.176 |                                        |
|              |                         | 330   | 3.108 | 3.116 | 2.308 | 0.120 | 0.512 | 0.176 |                                        |
|              |                         | 340   | 3.126 | 3.123 | 2.308 | 0.123 | 0.517 | 0.176 |                                        |
|              |                         | 350   | 3.134 | 3.130 | 2.308 | 0.125 | 0.521 | 0.176 |                                        |
|              |                         | 360   | 3.143 | 3.137 | 2.308 | 0.128 | 0.525 | 0.176 |                                        |
|              |                         | 370   | 3.146 | 3.144 | 2.308 | 0.130 | 0.529 | 0.176 |                                        |
|              |                         | 380   | 3.133 | 3.150 | 2.308 | 0.133 | 0.533 | 0.176 |                                        |
|              |                         | 390   | 3.171 | 3.156 | 2.308 | 0.135 | 0.537 | 0.176 |                                        |
|              |                         | 400   | 3.163 | 3.162 | 2.308 | 0.138 | 0.540 | 0.176 |                                        |
|              |                         | 410   | 3.185 | 3.168 | 2.308 | 0.140 | 0.543 | 0.176 |                                        |
|              |                         | 420   | 3.169 | 3.173 | 2.308 | 0.143 | 0.546 | 0.176 |                                        |
|              |                         | 430   | 3.194 | 3.178 | 2.308 | 0.145 | 0.549 | 0.177 |                                        |
|              |                         | 440   | 3.158 | 3.183 | 2.308 | 0.147 | 0.552 | 0.177 |                                        |
|              |                         | 450   | 3.215 | 3.188 | 2.308 | 0.150 | 0.554 | 0.177 |                                        |
|              |                         | 460   | 3.207 | 3.192 | 2.308 | 0.152 | 0.556 | 0.177 |                                        |
|              |                         | 470   | 3.206 | 3.197 | 2.308 | 0.154 | 0.559 | 0.177 |                                        |
|              |                         | 480   | 3.207 | 3.201 | 2.308 | 0.156 | 0.561 | 0.177 |                                        |
|              |                         | 490   | 3.225 | 3.205 | 2.308 | 0.158 | 0.563 | 0.177 |                                        |
|              |                         | 500   | 3.219 | 3.209 | 2.308 | 0.160 | 0.564 | 0.177 |                                        |
|              |                         | 510   | 3.206 | 3.213 | 2.308 | 0.162 | 0.566 | 0.177 |                                        |
|              |                         | 520   | 3.207 | 3.216 | 2.308 | 0.164 | 0.568 | 0.177 |                                        |
|              |                         | 530   | 3.210 | 3.220 | 2.308 | 0.166 | 0.569 | 0.177 |                                        |
|              |                         | 540   | 3.220 | 3.223 | 2.308 | 0.168 | 0.571 | 0.177 |                                        |
|              |                         | 550   | 3.221 | 3.226 | 2.308 | 0.170 | 0.572 | 0.177 |                                        |
|              |                         | 560   | 3.242 | 3.230 | 2.308 | 0.172 | 0.573 | 0.177 |                                        |
|              |                         | 570   | 3.241 | 3.233 | 2.308 | 0.174 | 0.575 | 0.177 |                                        |
|              |                         | 580   | 3.247 | 3.236 | 2.308 | 0.176 | 0.576 | 0.177 |                                        |
|              |                         | 590   | 3.242 | 3.238 | 2.308 | 0.177 | 0.577 | 0.177 |                                        |
|              |                         | 600   | 3.238 | 3.241 | 2.308 | 0.179 | 0.578 | 0.177 |                                        |
| GFET<br>#S31 | $c^{(CEA)} = 5$<br>nM   | -50   | 2.364 | 2.327 | -     | -     | -     | -     | $\tilde{c}^{(CEA)} \approx 3.7714$ nM  |
|              |                         | -40   | 2.337 | 2.327 |       |       |       |       |                                        |
|              |                         | -30   | 2.343 | 2.327 |       |       |       |       |                                        |
|              | $c^{(AFP)} = 100$<br>nM | -20   | 2.353 | 2.327 | -     | -     | -     | -     | $\tilde{c}^{(AFP)} \approx 52.2155$ nM |
|              |                         | -10   | 2.312 | 2.327 |       |       |       |       |                                        |
|              | $c^{(PTH)} = 20$<br>nM  | 0     | 2.340 | 2.327 | 2.327 | 0.000 | 0.000 | 0.000 | $\tilde{c}^{(PTH)} \approx 48.6533$ nM |
|              |                         | 10    | 2.461 | 2.442 | 2.327 | 0.004 | 0.036 | 0.075 |                                        |
| 20           |                         | 2.533 | 2.524 | 2.327 | 0.008 | 0.069 | 0.119 |       |                                        |

|     |       |       |       |       |       |       |
|-----|-------|-------|-------|-------|-------|-------|
| 30  | 2.571 | 2.586 | 2.327 | 0.012 | 0.101 | 0.146 |
| 40  | 2.655 | 2.636 | 2.327 | 0.016 | 0.131 | 0.161 |
| 50  | 2.672 | 2.677 | 2.327 | 0.020 | 0.159 | 0.171 |
| 60  | 2.731 | 2.713 | 2.327 | 0.024 | 0.185 | 0.176 |
| 70  | 2.760 | 2.745 | 2.327 | 0.028 | 0.210 | 0.180 |
| 80  | 2.795 | 2.774 | 2.327 | 0.031 | 0.233 | 0.182 |
| 90  | 2.820 | 2.800 | 2.327 | 0.035 | 0.255 | 0.183 |
| 100 | 2.812 | 2.825 | 2.327 | 0.039 | 0.276 | 0.184 |
| 110 | 2.841 | 2.849 | 2.327 | 0.042 | 0.295 | 0.184 |
| 120 | 2.864 | 2.871 | 2.327 | 0.046 | 0.313 | 0.184 |
| 130 | 2.894 | 2.891 | 2.327 | 0.049 | 0.331 | 0.184 |
| 140 | 2.913 | 2.911 | 2.327 | 0.052 | 0.347 | 0.184 |
| 150 | 2.920 | 2.930 | 2.327 | 0.056 | 0.362 | 0.184 |
| 160 | 2.937 | 2.947 | 2.327 | 0.059 | 0.376 | 0.184 |
| 170 | 2.974 | 2.964 | 2.327 | 0.062 | 0.390 | 0.184 |
| 180 | 2.965 | 2.980 | 2.327 | 0.065 | 0.403 | 0.185 |
| 190 | 2.998 | 2.995 | 2.327 | 0.068 | 0.415 | 0.185 |
| 200 | 3.022 | 3.009 | 2.327 | 0.071 | 0.426 | 0.185 |
| 210 | 3.014 | 3.023 | 2.327 | 0.074 | 0.436 | 0.185 |
| 220 | 3.060 | 3.036 | 2.327 | 0.077 | 0.446 | 0.185 |
| 230 | 3.038 | 3.048 | 2.327 | 0.080 | 0.456 | 0.185 |
| 240 | 3.073 | 3.060 | 2.327 | 0.083 | 0.465 | 0.185 |
| 250 | 3.076 | 3.071 | 2.327 | 0.086 | 0.473 | 0.185 |
| 260 | 3.082 | 3.081 | 2.327 | 0.089 | 0.481 | 0.185 |
| 270 | 3.102 | 3.091 | 2.327 | 0.091 | 0.488 | 0.185 |
| 280 | 3.108 | 3.101 | 2.327 | 0.094 | 0.495 | 0.185 |
| 290 | 3.114 | 3.110 | 2.327 | 0.097 | 0.502 | 0.185 |
| 300 | 3.149 | 3.119 | 2.327 | 0.099 | 0.508 | 0.185 |
| 310 | 3.122 | 3.127 | 2.327 | 0.102 | 0.513 | 0.185 |
| 320 | 3.131 | 3.135 | 2.327 | 0.104 | 0.519 | 0.185 |
| 330 | 3.151 | 3.143 | 2.327 | 0.107 | 0.524 | 0.185 |
| 340 | 3.158 | 3.150 | 2.327 | 0.109 | 0.529 | 0.185 |
| 350 | 3.167 | 3.157 | 2.327 | 0.112 | 0.533 | 0.185 |
| 360 | 3.158 | 3.163 | 2.327 | 0.114 | 0.538 | 0.185 |
| 370 | 3.159 | 3.170 | 2.327 | 0.116 | 0.542 | 0.185 |
| 380 | 3.203 | 3.176 | 2.327 | 0.118 | 0.545 | 0.185 |
| 390 | 3.184 | 3.182 | 2.327 | 0.121 | 0.549 | 0.185 |
| 400 | 3.178 | 3.187 | 2.327 | 0.123 | 0.552 | 0.185 |
| 410 | 3.228 | 3.192 | 2.327 | 0.125 | 0.555 | 0.185 |
| 420 | 3.206 | 3.198 | 2.327 | 0.127 | 0.558 | 0.185 |
| 430 | 3.196 | 3.202 | 2.327 | 0.129 | 0.561 | 0.185 |
| 440 | 3.216 | 3.207 | 2.327 | 0.131 | 0.564 | 0.185 |
| 450 | 3.230 | 3.212 | 2.327 | 0.133 | 0.566 | 0.185 |
| 460 | 3.214 | 3.216 | 2.327 | 0.135 | 0.569 | 0.185 |
| 470 | 3.221 | 3.220 | 2.327 | 0.137 | 0.571 | 0.185 |
| 480 | 3.229 | 3.224 | 2.327 | 0.139 | 0.573 | 0.185 |

|              |                       |       |       |       |       |       |       |                                        |                                       |
|--------------|-----------------------|-------|-------|-------|-------|-------|-------|----------------------------------------|---------------------------------------|
|              |                       | 490   | 3.208 | 3.228 | 2.327 | 0.141 | 0.575 | 0.185                                  |                                       |
|              |                       | 500   | 3.247 | 3.231 | 2.327 | 0.143 | 0.577 | 0.185                                  |                                       |
|              |                       | 510   | 3.241 | 3.235 | 2.327 | 0.145 | 0.578 | 0.185                                  |                                       |
|              |                       | 520   | 3.264 | 3.238 | 2.327 | 0.146 | 0.580 | 0.185                                  |                                       |
|              |                       | 530   | 3.223 | 3.242 | 2.327 | 0.148 | 0.582 | 0.185                                  |                                       |
|              |                       | 540   | 3.270 | 3.245 | 2.327 | 0.150 | 0.583 | 0.185                                  |                                       |
|              |                       | 550   | 3.280 | 3.248 | 2.327 | 0.152 | 0.584 | 0.185                                  |                                       |
|              |                       | 560   | 3.268 | 3.251 | 2.327 | 0.153 | 0.586 | 0.185                                  |                                       |
|              |                       | 570   | 3.240 | 3.254 | 2.327 | 0.155 | 0.587 | 0.185                                  |                                       |
|              |                       | 580   | 3.274 | 3.256 | 2.327 | 0.157 | 0.588 | 0.185                                  |                                       |
|              |                       | 590   | 3.292 | 3.259 | 2.327 | 0.158 | 0.589 | 0.185                                  |                                       |
|              |                       | 600   | 3.267 | 3.262 | 2.327 | 0.160 | 0.590 | 0.185                                  |                                       |
| GFET<br>#S32 | $c^{(CEA)} = 5$<br>nM | -50   | 2.270 | 2.273 | -     | -     | -     | -                                      | $\tilde{c}^{(CEA)} \approx 4.6617$ nM |
|              |                       | -40   | 2.293 | 2.273 |       |       |       |                                        |                                       |
|              |                       | -30   | 2.273 | 2.273 |       |       |       |                                        |                                       |
|              |                       | -20   | 2.304 | 2.273 |       |       |       |                                        |                                       |
|              |                       | -10   | 2.301 | 2.273 |       |       |       |                                        |                                       |
|              | 0                     | 2.301 | 2.273 | 2.273 | 0.000 | 0.000 | 0.000 |                                        |                                       |
|              | 10                    | 2.413 | 2.417 | 2.273 | 0.006 | 0.034 | 0.104 |                                        |                                       |
|              | 20                    | 2.512 | 2.495 | 2.273 | 0.012 | 0.066 | 0.144 |                                        |                                       |
|              | 30                    | 2.521 | 2.547 | 2.273 | 0.018 | 0.096 | 0.160 |                                        |                                       |
|              | 40                    | 2.591 | 2.587 | 2.273 | 0.024 | 0.125 | 0.166 |                                        |                                       |
|              | 50                    | 2.619 | 2.622 | 2.273 | 0.029 | 0.152 | 0.168 |                                        |                                       |
|              | 60                    | 2.647 | 2.654 | 2.273 | 0.035 | 0.177 | 0.169 |                                        |                                       |
|              | 70                    | 2.687 | 2.683 | 2.273 | 0.040 | 0.201 | 0.170 |                                        |                                       |
|              | 80                    | 2.737 | 2.711 | 2.273 | 0.045 | 0.224 | 0.170 |                                        |                                       |
|              | 90                    | 2.731 | 2.738 | 2.273 | 0.051 | 0.245 | 0.170 |                                        |                                       |
|              | 100                   | 2.756 | 2.763 | 2.273 | 0.056 | 0.265 | 0.170 |                                        |                                       |
|              | 110                   | 2.812 | 2.787 | 2.273 | 0.061 | 0.284 | 0.170 | $\tilde{c}^{(AFP)} \approx 50.1773$ nM |                                       |
|              | 120                   | 2.792 | 2.810 | 2.273 | 0.066 | 0.302 | 0.170 |                                        |                                       |
|              | 130                   | 2.833 | 2.831 | 2.273 | 0.070 | 0.319 | 0.170 |                                        |                                       |
|              | 140                   | 2.870 | 2.852 | 2.273 | 0.075 | 0.334 | 0.170 | $\tilde{c}^{(PTH)} \approx 91.0063$ nM |                                       |
|              | 150                   | 2.869 | 2.871 | 2.273 | 0.080 | 0.349 | 0.170 |                                        |                                       |
|              | 160                   | 2.875 | 2.890 | 2.273 | 0.084 | 0.364 | 0.170 |                                        |                                       |
|              | 170                   | 2.904 | 2.908 | 2.273 | 0.089 | 0.377 | 0.170 |                                        |                                       |
|              | 180                   | 2.912 | 2.925 | 2.273 | 0.093 | 0.389 | 0.170 |                                        |                                       |
|              | 190                   | 2.962 | 2.941 | 2.273 | 0.097 | 0.401 | 0.170 |                                        |                                       |
|              | 200                   | 2.958 | 2.956 | 2.273 | 0.101 | 0.412 | 0.170 |                                        |                                       |
|              | 210                   | 2.957 | 2.971 | 2.273 | 0.105 | 0.423 | 0.170 |                                        |                                       |
|              | 220                   | 3.001 | 2.985 | 2.273 | 0.109 | 0.433 | 0.170 |                                        |                                       |
| 230          | 3.010                 | 2.998 | 2.273 | 0.113 | 0.442 | 0.170 |       |                                        |                                       |
| 240          | 3.019                 | 3.011 | 2.273 | 0.117 | 0.451 | 0.170 |       |                                        |                                       |
| 250          | 3.055                 | 3.023 | 2.273 | 0.121 | 0.459 | 0.170 |       |                                        |                                       |
| 260          | 3.027                 | 3.034 | 2.273 | 0.125 | 0.467 | 0.170 |       |                                        |                                       |
| 270          | 3.036                 | 3.045 | 2.273 | 0.128 | 0.475 | 0.170 |       |                                        |                                       |
| 280          | 3.058                 | 3.056 | 2.273 | 0.132 | 0.482 | 0.170 |       |                                        |                                       |

|              |                        |       |       |       |       |       |       |                                          |                                           |
|--------------|------------------------|-------|-------|-------|-------|-------|-------|------------------------------------------|-------------------------------------------|
|              |                        | 290   | 3.062 | 3.066 | 2.273 | 0.135 | 0.488 | 0.170                                    |                                           |
|              |                        | 300   | 3.088 | 3.076 | 2.273 | 0.139 | 0.494 | 0.170                                    |                                           |
|              |                        | 310   | 3.083 | 3.085 | 2.273 | 0.142 | 0.500 | 0.170                                    |                                           |
|              |                        | 320   | 3.116 | 3.094 | 2.273 | 0.146 | 0.506 | 0.170                                    |                                           |
|              |                        | 330   | 3.131 | 3.102 | 2.273 | 0.149 | 0.511 | 0.170                                    |                                           |
|              |                        | 340   | 3.125 | 3.110 | 2.273 | 0.152 | 0.516 | 0.170                                    |                                           |
|              |                        | 350   | 3.110 | 3.118 | 2.273 | 0.155 | 0.520 | 0.170                                    |                                           |
|              |                        | 360   | 3.148 | 3.125 | 2.273 | 0.158 | 0.525 | 0.170                                    |                                           |
|              |                        | 370   | 3.153 | 3.132 | 2.273 | 0.161 | 0.529 | 0.170                                    |                                           |
|              |                        | 380   | 3.163 | 3.139 | 2.273 | 0.164 | 0.533 | 0.170                                    |                                           |
|              |                        | 390   | 3.154 | 3.146 | 2.273 | 0.167 | 0.537 | 0.170                                    |                                           |
|              |                        | 400   | 3.161 | 3.152 | 2.273 | 0.170 | 0.540 | 0.170                                    |                                           |
|              |                        | 410   | 3.170 | 3.158 | 2.273 | 0.173 | 0.543 | 0.170                                    |                                           |
|              |                        | 420   | 3.139 | 3.164 | 2.273 | 0.175 | 0.546 | 0.170                                    |                                           |
|              |                        | 430   | 3.179 | 3.169 | 2.273 | 0.178 | 0.549 | 0.170                                    |                                           |
|              |                        | 440   | 3.189 | 3.175 | 2.273 | 0.180 | 0.552 | 0.170                                    |                                           |
|              |                        | 450   | 3.174 | 3.180 | 2.273 | 0.183 | 0.554 | 0.170                                    |                                           |
|              |                        | 460   | 3.204 | 3.185 | 2.273 | 0.186 | 0.557 | 0.170                                    |                                           |
|              |                        | 470   | 3.186 | 3.189 | 2.273 | 0.188 | 0.559 | 0.170                                    |                                           |
|              |                        | 480   | 3.213 | 3.194 | 2.273 | 0.190 | 0.561 | 0.170                                    |                                           |
|              |                        | 490   | 3.187 | 3.198 | 2.273 | 0.193 | 0.563 | 0.170                                    |                                           |
|              |                        | 500   | 3.195 | 3.203 | 2.273 | 0.195 | 0.565 | 0.170                                    |                                           |
|              |                        | 510   | 3.219 | 3.207 | 2.273 | 0.197 | 0.567 | 0.170                                    |                                           |
|              |                        | 520   | 3.182 | 3.211 | 2.273 | 0.200 | 0.569 | 0.170                                    |                                           |
|              |                        | 530   | 3.237 | 3.214 | 2.273 | 0.202 | 0.570 | 0.170                                    |                                           |
|              |                        | 540   | 3.238 | 3.218 | 2.273 | 0.204 | 0.572 | 0.170                                    |                                           |
|              |                        | 550   | 3.258 | 3.222 | 2.273 | 0.206 | 0.573 | 0.170                                    |                                           |
|              |                        | 560   | 3.225 | 3.225 | 2.273 | 0.208 | 0.575 | 0.170                                    |                                           |
|              |                        | 570   | 3.234 | 3.228 | 2.273 | 0.210 | 0.576 | 0.170                                    |                                           |
|              |                        | 580   | 3.215 | 3.232 | 2.273 | 0.212 | 0.577 | 0.170                                    |                                           |
|              |                        | 590   | 3.225 | 3.235 | 2.273 | 0.214 | 0.578 | 0.170                                    |                                           |
|              |                        | 600   | 3.248 | 3.238 | 2.273 | 0.216 | 0.579 | 0.170                                    |                                           |
| GFET<br>#S33 | $c^{(CEA)} = 20$<br>nM | -50   | 2.304 | 2.302 | -     | -     | -     | -                                        | $\tilde{c}^{(CEA)} \approx$<br>18.6573 nM |
|              |                        | -40   | 2.298 | 2.302 |       |       |       |                                          |                                           |
|              |                        | -30   | 2.302 | 2.302 |       |       |       |                                          |                                           |
|              |                        | -20   | 2.315 | 2.302 |       |       |       |                                          |                                           |
|              |                        | -10   | 2.287 | 2.302 |       |       |       |                                          |                                           |
|              | 0                      | 2.309 | 2.302 | 2.302 | 0.000 | 0.000 | 0.000 | $\tilde{c}^{(AFP)} \approx$<br>8.7554 nM |                                           |
|              | $c^{(AFP)} = 5$<br>nM  | 10    | 2.329 | 2.348 | 2.302 | 0.031 | 0.006 |                                          | 0.009                                     |
|              |                        | 20    | 2.391 | 2.390 | 2.302 | 0.059 | 0.013 |                                          | 0.017                                     |
|              | $c^{(PTH)} = 2$<br>nM  | 30    | 2.456 | 2.431 | 2.302 | 0.086 | 0.019 | 0.024                                    | $\tilde{c}^{(PTH)} \approx$<br>5.1103 nM  |
|              |                        | 40    | 2.470 | 2.468 | 2.302 | 0.110 | 0.025 | 0.031                                    |                                           |
|              |                        | 50    | 2.496 | 2.504 | 2.302 | 0.133 | 0.031 | 0.037                                    |                                           |
|              |                        | 60    | 2.531 | 2.537 | 2.302 | 0.155 | 0.037 | 0.043                                    |                                           |
|              |                        | 70    | 2.579 | 2.568 | 2.302 | 0.175 | 0.043 | 0.048                                    |                                           |
| 80           |                        | 2.606 | 2.598 | 2.302 | 0.194 | 0.048 | 0.053 |                                          |                                           |



|     |       |       |       |       |       |       |
|-----|-------|-------|-------|-------|-------|-------|
| 90  | 2.629 | 2.626 | 2.302 | 0.211 | 0.054 | 0.058 |
| 100 | 2.654 | 2.652 | 2.302 | 0.228 | 0.060 | 0.062 |
| 110 | 2.697 | 2.677 | 2.302 | 0.243 | 0.065 | 0.067 |
| 120 | 2.691 | 2.700 | 2.302 | 0.257 | 0.070 | 0.070 |
| 130 | 2.744 | 2.722 | 2.302 | 0.270 | 0.076 | 0.074 |
| 140 | 2.730 | 2.742 | 2.302 | 0.283 | 0.081 | 0.077 |
| 150 | 2.755 | 2.762 | 2.302 | 0.294 | 0.086 | 0.080 |
| 160 | 2.800 | 2.780 | 2.302 | 0.305 | 0.091 | 0.083 |
| 170 | 2.805 | 2.798 | 2.302 | 0.315 | 0.095 | 0.085 |
| 180 | 2.837 | 2.814 | 2.302 | 0.324 | 0.100 | 0.088 |
| 190 | 2.842 | 2.830 | 2.302 | 0.333 | 0.105 | 0.090 |
| 200 | 2.848 | 2.845 | 2.302 | 0.341 | 0.110 | 0.092 |
| 210 | 2.853 | 2.859 | 2.302 | 0.349 | 0.114 | 0.094 |
| 220 | 2.869 | 2.872 | 2.302 | 0.356 | 0.119 | 0.095 |
| 230 | 2.905 | 2.884 | 2.302 | 0.362 | 0.123 | 0.097 |
| 240 | 2.893 | 2.896 | 2.302 | 0.369 | 0.127 | 0.098 |
| 250 | 2.910 | 2.908 | 2.302 | 0.374 | 0.132 | 0.100 |
| 260 | 2.930 | 2.919 | 2.302 | 0.380 | 0.136 | 0.101 |
| 270 | 2.965 | 2.929 | 2.302 | 0.385 | 0.140 | 0.102 |
| 280 | 2.944 | 2.939 | 2.302 | 0.389 | 0.144 | 0.103 |
| 290 | 2.936 | 2.948 | 2.302 | 0.394 | 0.148 | 0.104 |
| 300 | 2.948 | 2.957 | 2.302 | 0.398 | 0.152 | 0.105 |
| 310 | 2.972 | 2.965 | 2.302 | 0.401 | 0.155 | 0.106 |
| 320 | 2.991 | 2.973 | 2.302 | 0.405 | 0.159 | 0.107 |
| 330 | 2.986 | 2.981 | 2.302 | 0.408 | 0.163 | 0.108 |
| 340 | 2.987 | 2.988 | 2.302 | 0.411 | 0.166 | 0.109 |
| 350 | 2.992 | 2.995 | 2.302 | 0.414 | 0.170 | 0.109 |
| 360 | 3.025 | 3.002 | 2.302 | 0.417 | 0.174 | 0.110 |
| 370 | 2.983 | 3.009 | 2.302 | 0.419 | 0.177 | 0.110 |
| 380 | 3.008 | 3.015 | 2.302 | 0.422 | 0.180 | 0.111 |
| 390 | 3.040 | 3.021 | 2.302 | 0.424 | 0.184 | 0.111 |
| 400 | 3.024 | 3.027 | 2.302 | 0.426 | 0.187 | 0.112 |
| 410 | 3.056 | 3.032 | 2.302 | 0.428 | 0.190 | 0.112 |
| 420 | 3.024 | 3.037 | 2.302 | 0.429 | 0.193 | 0.113 |
| 430 | 3.040 | 3.042 | 2.302 | 0.431 | 0.196 | 0.113 |
| 440 | 3.050 | 3.047 | 2.302 | 0.433 | 0.199 | 0.113 |
| 450 | 3.038 | 3.052 | 2.302 | 0.434 | 0.202 | 0.114 |
| 460 | 3.046 | 3.057 | 2.302 | 0.435 | 0.205 | 0.114 |
| 470 | 3.070 | 3.061 | 2.302 | 0.437 | 0.208 | 0.114 |
| 480 | 3.076 | 3.065 | 2.302 | 0.438 | 0.211 | 0.114 |
| 490 | 3.082 | 3.069 | 2.302 | 0.439 | 0.214 | 0.115 |
| 500 | 3.085 | 3.073 | 2.302 | 0.440 | 0.217 | 0.115 |
| 510 | 3.085 | 3.077 | 2.302 | 0.441 | 0.219 | 0.115 |
| 520 | 3.104 | 3.081 | 2.302 | 0.442 | 0.222 | 0.115 |
| 530 | 3.112 | 3.084 | 2.302 | 0.443 | 0.224 | 0.115 |
| 540 | 3.109 | 3.088 | 2.302 | 0.443 | 0.227 | 0.115 |

|              |                                                                          |       |       |       |       |       |       |       |                                                                                                                           |
|--------------|--------------------------------------------------------------------------|-------|-------|-------|-------|-------|-------|-------|---------------------------------------------------------------------------------------------------------------------------|
|              |                                                                          | 550   | 3.090 | 3.091 | 2.302 | 0.444 | 0.229 | 0.116 |                                                                                                                           |
|              |                                                                          | 560   | 3.116 | 3.094 | 2.302 | 0.445 | 0.232 | 0.116 |                                                                                                                           |
|              |                                                                          | 570   | 3.105 | 3.098 | 2.302 | 0.445 | 0.234 | 0.116 |                                                                                                                           |
|              |                                                                          | 580   | 3.089 | 3.101 | 2.302 | 0.446 | 0.237 | 0.116 |                                                                                                                           |
|              |                                                                          | 590   | 3.096 | 3.104 | 2.302 | 0.446 | 0.239 | 0.116 |                                                                                                                           |
|              |                                                                          | 600   | 3.115 | 3.107 | 2.302 | 0.447 | 0.241 | 0.116 |                                                                                                                           |
| GFET<br>#S34 | $c^{(CEA)} = 20$<br>nM<br>$c^{(AFP)} = 5$<br>nM<br>$c^{(PTH)} = 5$<br>nM | -50   | 2.310 | 2.313 | -     | -     | -     | -     | $\tilde{c}^{(CEA)} \approx 20.1675$ nM<br>$\tilde{c}^{(AFP)} \approx 8.1654$ nM<br>$\tilde{c}^{(PTH)} \approx 16.4865$ nM |
|              |                                                                          | -40   | 2.297 | 2.313 |       |       |       |       |                                                                                                                           |
|              |                                                                          | -30   | 2.316 | 2.313 |       |       |       |       |                                                                                                                           |
|              |                                                                          | -20   | 2.320 | 2.313 |       |       |       |       |                                                                                                                           |
|              |                                                                          | -10   | 2.332 | 2.313 |       |       |       |       |                                                                                                                           |
|              |                                                                          | 0     | 2.309 | 2.313 | 2.313 | 0.000 | 0.000 | 0.000 |                                                                                                                           |
|              |                                                                          | 10    | 2.391 | 2.378 | 2.313 | 0.035 | 0.007 | 0.023 |                                                                                                                           |
|              |                                                                          | 20    | 2.442 | 2.437 | 2.313 | 0.068 | 0.014 | 0.042 |                                                                                                                           |
|              |                                                                          | 30    | 2.510 | 2.490 | 2.313 | 0.098 | 0.021 | 0.058 |                                                                                                                           |
|              |                                                                          | 40    | 2.521 | 2.538 | 2.313 | 0.126 | 0.028 | 0.071 |                                                                                                                           |
|              |                                                                          | 50    | 2.576 | 2.581 | 2.313 | 0.152 | 0.035 | 0.081 |                                                                                                                           |
|              |                                                                          | 60    | 2.620 | 2.620 | 2.313 | 0.176 | 0.041 | 0.090 |                                                                                                                           |
|              |                                                                          | 70    | 2.653 | 2.656 | 2.313 | 0.198 | 0.048 | 0.097 |                                                                                                                           |
|              |                                                                          | 80    | 2.674 | 2.690 | 2.313 | 0.219 | 0.054 | 0.103 |                                                                                                                           |
|              |                                                                          | 90    | 2.722 | 2.720 | 2.313 | 0.238 | 0.060 | 0.108 |                                                                                                                           |
|              |                                                                          | 100   | 2.774 | 2.748 | 2.313 | 0.256 | 0.067 | 0.112 |                                                                                                                           |
|              |                                                                          | 110   | 2.781 | 2.774 | 2.313 | 0.273 | 0.073 | 0.116 |                                                                                                                           |
|              |                                                                          | 120   | 2.810 | 2.798 | 2.313 | 0.288 | 0.079 | 0.118 |                                                                                                                           |
|              |                                                                          | 130   | 2.831 | 2.821 | 2.313 | 0.302 | 0.084 | 0.121 |                                                                                                                           |
|              |                                                                          | 140   | 2.853 | 2.841 | 2.313 | 0.315 | 0.090 | 0.123 |                                                                                                                           |
|              |                                                                          | 150   | 2.888 | 2.861 | 2.313 | 0.328 | 0.096 | 0.124 |                                                                                                                           |
|              |                                                                          | 160   | 2.864 | 2.879 | 2.313 | 0.339 | 0.101 | 0.125 |                                                                                                                           |
|              |                                                                          | 170   | 2.912 | 2.896 | 2.313 | 0.350 | 0.107 | 0.127 |                                                                                                                           |
|              |                                                                          | 180   | 2.933 | 2.912 | 2.313 | 0.359 | 0.112 | 0.127 |                                                                                                                           |
|              |                                                                          | 190   | 2.956 | 2.927 | 2.313 | 0.369 | 0.118 | 0.128 |                                                                                                                           |
|              |                                                                          | 200   | 2.955 | 2.942 | 2.313 | 0.377 | 0.123 | 0.129 |                                                                                                                           |
|              |                                                                          | 210   | 2.962 | 2.955 | 2.313 | 0.385 | 0.128 | 0.129 |                                                                                                                           |
|              |                                                                          | 220   | 2.979 | 2.968 | 2.313 | 0.392 | 0.133 | 0.130 |                                                                                                                           |
|              |                                                                          | 230   | 2.998 | 2.980 | 2.313 | 0.399 | 0.138 | 0.130 |                                                                                                                           |
|              |                                                                          | 240   | 2.988 | 2.991 | 2.313 | 0.405 | 0.143 | 0.130 |                                                                                                                           |
|              |                                                                          | 250   | 3.011 | 3.002 | 2.313 | 0.411 | 0.147 | 0.130 |                                                                                                                           |
|              |                                                                          | 260   | 3.011 | 3.012 | 2.313 | 0.416 | 0.152 | 0.131 |                                                                                                                           |
|              |                                                                          | 270   | 3.026 | 3.022 | 2.313 | 0.421 | 0.157 | 0.131 |                                                                                                                           |
|              |                                                                          | 280   | 3.033 | 3.031 | 2.313 | 0.426 | 0.161 | 0.131 |                                                                                                                           |
| 290          | 3.044                                                                    | 3.040 | 2.313 | 0.430 | 0.166 | 0.131 |       |       |                                                                                                                           |
| 300          | 3.050                                                                    | 3.049 | 2.313 | 0.434 | 0.170 | 0.131 |       |       |                                                                                                                           |
| 310          | 3.051                                                                    | 3.057 | 2.313 | 0.438 | 0.175 | 0.131 |       |       |                                                                                                                           |
| 320          | 3.070                                                                    | 3.064 | 2.313 | 0.441 | 0.179 | 0.131 |       |       |                                                                                                                           |
| 330          | 3.080                                                                    | 3.072 | 2.313 | 0.444 | 0.183 | 0.131 |       |       |                                                                                                                           |
| 340          | 3.082                                                                    | 3.079 | 2.313 | 0.447 | 0.187 | 0.131 |       |       |                                                                                                                           |

|              |                        |       |       |       |       |       |       |       |                                           |                                           |
|--------------|------------------------|-------|-------|-------|-------|-------|-------|-------|-------------------------------------------|-------------------------------------------|
|              |                        | 350   | 3.101 | 3.086 | 2.313 | 0.450 | 0.191 | 0.131 |                                           |                                           |
|              |                        | 360   | 3.086 | 3.092 | 2.313 | 0.453 | 0.195 | 0.131 |                                           |                                           |
|              |                        | 370   | 3.124 | 3.099 | 2.313 | 0.455 | 0.199 | 0.131 |                                           |                                           |
|              |                        | 380   | 3.098 | 3.105 | 2.313 | 0.457 | 0.203 | 0.131 |                                           |                                           |
|              |                        | 390   | 3.094 | 3.110 | 2.313 | 0.459 | 0.207 | 0.131 |                                           |                                           |
|              |                        | 400   | 3.113 | 3.116 | 2.313 | 0.461 | 0.210 | 0.131 |                                           |                                           |
|              |                        | 410   | 3.135 | 3.121 | 2.313 | 0.463 | 0.214 | 0.132 |                                           |                                           |
|              |                        | 420   | 3.141 | 3.127 | 2.313 | 0.464 | 0.218 | 0.132 |                                           |                                           |
|              |                        | 430   | 3.129 | 3.132 | 2.313 | 0.466 | 0.221 | 0.132 |                                           |                                           |
|              |                        | 440   | 3.154 | 3.137 | 2.313 | 0.467 | 0.225 | 0.132 |                                           |                                           |
|              |                        | 450   | 3.149 | 3.141 | 2.313 | 0.468 | 0.228 | 0.132 |                                           |                                           |
|              |                        | 460   | 3.186 | 3.146 | 2.313 | 0.470 | 0.231 | 0.132 |                                           |                                           |
|              |                        | 470   | 3.144 | 3.150 | 2.313 | 0.471 | 0.235 | 0.132 |                                           |                                           |
|              |                        | 480   | 3.149 | 3.154 | 2.313 | 0.472 | 0.238 | 0.132 |                                           |                                           |
|              |                        | 490   | 3.174 | 3.159 | 2.313 | 0.473 | 0.241 | 0.132 |                                           |                                           |
|              |                        | 500   | 3.149 | 3.163 | 2.313 | 0.474 | 0.244 | 0.132 |                                           |                                           |
|              |                        | 510   | 3.168 | 3.167 | 2.313 | 0.474 | 0.247 | 0.132 |                                           |                                           |
|              |                        | 520   | 3.164 | 3.170 | 2.313 | 0.475 | 0.250 | 0.132 |                                           |                                           |
|              |                        | 530   | 3.178 | 3.174 | 2.313 | 0.476 | 0.253 | 0.132 |                                           |                                           |
|              |                        | 540   | 3.193 | 3.178 | 2.313 | 0.477 | 0.256 | 0.132 |                                           |                                           |
|              |                        | 550   | 3.196 | 3.181 | 2.313 | 0.477 | 0.259 | 0.132 |                                           |                                           |
|              |                        | 560   | 3.189 | 3.185 | 2.313 | 0.478 | 0.262 | 0.132 |                                           |                                           |
|              |                        | 570   | 3.186 | 3.188 | 2.313 | 0.478 | 0.265 | 0.132 |                                           |                                           |
|              |                        | 580   | 3.199 | 3.191 | 2.313 | 0.479 | 0.267 | 0.132 |                                           |                                           |
|              |                        | 590   | 3.207 | 3.194 | 2.313 | 0.479 | 0.270 | 0.132 |                                           |                                           |
|              |                        | 600   | 3.211 | 3.197 | 2.313 | 0.480 | 0.273 | 0.132 |                                           |                                           |
| GFET<br>#S35 | $c^{(CEA)} = 20$<br>nM | -50   | 2.337 | 2.334 | -     | -     | -     | -     | $\tilde{c}^{(CEA)} \approx$<br>21.4774 nM |                                           |
|              |                        | -40   | 2.343 | 2.334 |       |       |       |       |                                           |                                           |
|              |                        | -30   | 2.330 | 2.334 |       |       |       |       |                                           |                                           |
|              |                        | -20   | 2.327 | 2.334 |       |       |       |       |                                           |                                           |
|              |                        | -10   | 2.351 | 2.334 |       |       |       |       |                                           |                                           |
|              | 0                      | 2.325 | 2.334 | 2.334 | 0.000 | 0.000 | 0.000 |       |                                           |                                           |
|              | $c^{(AFP)} = 5$<br>nM  | 10    | 2.450 | 2.434 | 2.334 | 0.038 | 0.007 | 0.054 |                                           | $\tilde{c}^{(AFP)} \approx$<br>7.6609 nM  |
|              |                        | 20    | 2.507 | 2.508 | 2.334 | 0.074 | 0.013 | 0.087 |                                           |                                           |
|              |                        | 30    | 2.571 | 2.567 | 2.334 | 0.106 | 0.020 | 0.107 |                                           |                                           |
|              | $c^{(PTH)} = 20$<br>nM | 40    | 2.609 | 2.616 | 2.334 | 0.137 | 0.026 | 0.119 |                                           | $\tilde{c}^{(PTH)} \approx$<br>47.3325 nM |
|              |                        | 50    | 2.677 | 2.657 | 2.334 | 0.164 | 0.032 | 0.126 |                                           |                                           |
|              |                        | 60    | 2.703 | 2.693 | 2.334 | 0.190 | 0.038 | 0.130 |                                           |                                           |
|              |                        | 70    | 2.730 | 2.725 | 2.334 | 0.214 | 0.044 | 0.133 |                                           |                                           |
|              |                        | 80    | 2.780 | 2.755 | 2.334 | 0.236 | 0.050 | 0.134 |                                           |                                           |
|              |                        | 90    | 2.796 | 2.782 | 2.334 | 0.256 | 0.056 | 0.135 |                                           |                                           |
|              |                        |       | 100   | 2.818 | 2.807 | 2.334 | 0.275 | 0.062 |                                           | 0.136                                     |
|              |                        |       | 110   | 2.819 | 2.830 | 2.334 | 0.292 | 0.067 |                                           | 0.136                                     |
|              |                        | 120   | 2.853 | 2.852 | 2.334 | 0.308 | 0.073 | 0.137 |                                           |                                           |
|              |                        | 130   | 2.893 | 2.872 | 2.334 | 0.323 | 0.078 | 0.137 |                                           |                                           |
|              |                        | 140   | 2.886 | 2.891 | 2.334 | 0.336 | 0.084 | 0.137 |                                           |                                           |

|     |       |       |       |       |       |       |
|-----|-------|-------|-------|-------|-------|-------|
| 150 | 2.898 | 2.909 | 2.334 | 0.349 | 0.089 | 0.137 |
| 160 | 2.919 | 2.926 | 2.334 | 0.360 | 0.094 | 0.137 |
| 170 | 2.942 | 2.942 | 2.334 | 0.371 | 0.099 | 0.137 |
| 180 | 2.955 | 2.956 | 2.334 | 0.381 | 0.104 | 0.137 |
| 190 | 2.961 | 2.970 | 2.334 | 0.390 | 0.109 | 0.137 |
| 200 | 2.980 | 2.984 | 2.334 | 0.399 | 0.114 | 0.137 |
| 210 | 2.977 | 2.996 | 2.334 | 0.406 | 0.119 | 0.137 |
| 220 | 2.989 | 3.008 | 2.334 | 0.414 | 0.123 | 0.137 |
| 230 | 3.011 | 3.019 | 2.334 | 0.420 | 0.128 | 0.137 |
| 240 | 3.039 | 3.030 | 2.334 | 0.426 | 0.132 | 0.137 |
| 250 | 3.034 | 3.040 | 2.334 | 0.432 | 0.137 | 0.137 |
| 260 | 3.070 | 3.050 | 2.334 | 0.437 | 0.141 | 0.137 |
| 270 | 3.066 | 3.059 | 2.334 | 0.442 | 0.146 | 0.137 |
| 280 | 3.050 | 3.068 | 2.334 | 0.446 | 0.150 | 0.137 |
| 290 | 3.072 | 3.076 | 2.334 | 0.451 | 0.154 | 0.137 |
| 300 | 3.105 | 3.084 | 2.334 | 0.454 | 0.158 | 0.137 |
| 310 | 3.102 | 3.091 | 2.334 | 0.458 | 0.162 | 0.137 |
| 320 | 3.098 | 3.099 | 2.334 | 0.461 | 0.166 | 0.137 |
| 330 | 3.120 | 3.106 | 2.334 | 0.464 | 0.170 | 0.137 |
| 340 | 3.122 | 3.112 | 2.334 | 0.467 | 0.174 | 0.137 |
| 350 | 3.146 | 3.119 | 2.334 | 0.469 | 0.178 | 0.137 |
| 360 | 3.109 | 3.125 | 2.334 | 0.472 | 0.182 | 0.137 |
| 370 | 3.143 | 3.131 | 2.334 | 0.474 | 0.185 | 0.137 |
| 380 | 3.130 | 3.136 | 2.334 | 0.476 | 0.189 | 0.137 |
| 390 | 3.137 | 3.142 | 2.334 | 0.478 | 0.192 | 0.137 |
| 400 | 3.184 | 3.147 | 2.334 | 0.480 | 0.196 | 0.137 |
| 410 | 3.149 | 3.152 | 2.334 | 0.481 | 0.199 | 0.137 |
| 420 | 3.149 | 3.157 | 2.334 | 0.483 | 0.203 | 0.137 |
| 430 | 3.154 | 3.161 | 2.334 | 0.484 | 0.206 | 0.137 |
| 440 | 3.186 | 3.166 | 2.334 | 0.485 | 0.209 | 0.137 |
| 450 | 3.160 | 3.170 | 2.334 | 0.486 | 0.213 | 0.137 |
| 460 | 3.170 | 3.174 | 2.334 | 0.487 | 0.216 | 0.137 |
| 470 | 3.174 | 3.178 | 2.334 | 0.488 | 0.219 | 0.137 |
| 480 | 3.187 | 3.182 | 2.334 | 0.489 | 0.222 | 0.137 |
| 490 | 3.199 | 3.186 | 2.334 | 0.490 | 0.225 | 0.137 |
| 500 | 3.173 | 3.190 | 2.334 | 0.491 | 0.228 | 0.137 |
| 510 | 3.194 | 3.194 | 2.334 | 0.492 | 0.231 | 0.137 |
| 520 | 3.176 | 3.197 | 2.334 | 0.492 | 0.234 | 0.137 |
| 530 | 3.189 | 3.201 | 2.334 | 0.493 | 0.237 | 0.137 |
| 540 | 3.215 | 3.204 | 2.334 | 0.493 | 0.239 | 0.137 |
| 550 | 3.201 | 3.207 | 2.334 | 0.494 | 0.242 | 0.137 |
| 560 | 3.214 | 3.210 | 2.334 | 0.494 | 0.245 | 0.137 |
| 570 | 3.215 | 3.214 | 2.334 | 0.495 | 0.247 | 0.137 |
| 580 | 3.198 | 3.217 | 2.334 | 0.495 | 0.250 | 0.137 |
| 590 | 3.205 | 3.219 | 2.334 | 0.496 | 0.253 | 0.137 |
| 600 | 3.231 | 3.222 | 2.334 | 0.496 | 0.255 | 0.137 |

|              |                        |       |       |       |       |       |       |                                            |                                           |
|--------------|------------------------|-------|-------|-------|-------|-------|-------|--------------------------------------------|-------------------------------------------|
| GFET<br>#S36 | $c^{(CEA)} = 20$<br>nM | -50   | 2.293 | 2.308 | -     | -     | -     | -                                          | $\tilde{c}^{(CEA)} \approx$<br>19.7633 nM |
|              |                        | -40   | 2.301 | 2.308 |       |       |       |                                            |                                           |
|              |                        | -30   | 2.283 | 2.308 |       |       |       |                                            |                                           |
|              |                        | -20   | 2.326 | 2.308 |       |       |       |                                            |                                           |
|              |                        | -10   | 2.323 | 2.308 |       |       |       |                                            |                                           |
|              |                        | 0     | 2.312 | 2.308 | 2.308 | 0.000 | 0.000 | 0.000                                      |                                           |
|              |                        | 10    | 2.479 | 2.482 | 2.308 | 0.032 | 0.007 | 0.136                                      |                                           |
|              |                        | 20    | 2.556 | 2.559 | 2.308 | 0.062 | 0.014 | 0.176                                      |                                           |
|              |                        | 30    | 2.617 | 2.606 | 2.308 | 0.089 | 0.020 | 0.188                                      |                                           |
|              |                        | 40    | 2.625 | 2.641 | 2.308 | 0.115 | 0.027 | 0.192                                      |                                           |
|              |                        | 50    | 2.670 | 2.673 | 2.308 | 0.139 | 0.033 | 0.193                                      |                                           |
|              |                        | 60    | 2.682 | 2.701 | 2.308 | 0.161 | 0.040 | 0.193                                      |                                           |
|              |                        | 70    | 2.712 | 2.728 | 2.308 | 0.181 | 0.046 | 0.193                                      |                                           |
|              |                        | 80    | 2.711 | 2.754 | 2.308 | 0.200 | 0.052 | 0.193                                      |                                           |
|              |                        | 90    | 2.765 | 2.777 | 2.308 | 0.218 | 0.058 | 0.193                                      |                                           |
|              |                        | 100   | 2.803 | 2.800 | 2.308 | 0.235 | 0.064 | 0.193                                      |                                           |
|              |                        | 110   | 2.826 | 2.821 | 2.308 | 0.250 | 0.070 | 0.193                                      |                                           |
|              |                        | 120   | 2.834 | 2.841 | 2.308 | 0.264 | 0.076 | 0.193                                      |                                           |
|              |                        | 130   | 2.847 | 2.860 | 2.308 | 0.277 | 0.081 | 0.193                                      |                                           |
|              |                        | 140   | 2.870 | 2.878 | 2.308 | 0.290 | 0.087 | 0.193                                      |                                           |
|              |                        | 150   | 2.894 | 2.894 | 2.308 | 0.301 | 0.092 | 0.193                                      |                                           |
|              |                        | 160   | 2.921 | 2.910 | 2.308 | 0.312 | 0.098 | 0.193                                      |                                           |
|              |                        | 170   | 2.916 | 2.926 | 2.308 | 0.322 | 0.103 | 0.193                                      |                                           |
|              |                        | 180   | 2.957 | 2.940 | 2.308 | 0.331 | 0.108 | 0.193                                      |                                           |
|              |                        | 190   | 2.967 | 2.953 | 2.308 | 0.339 | 0.113 | 0.193                                      |                                           |
|              |                        | 200   | 2.947 | 2.966 | 2.308 | 0.347 | 0.118 | 0.193                                      |                                           |
|              |                        | 210   | 2.957 | 2.979 | 2.308 | 0.354 | 0.123 | 0.193                                      |                                           |
|              |                        | 220   | 2.985 | 2.990 | 2.308 | 0.361 | 0.128 | 0.193                                      |                                           |
|              |                        | 230   | 3.006 | 3.001 | 2.308 | 0.368 | 0.133 | 0.193                                      |                                           |
|              |                        | 240   | 3.012 | 3.012 | 2.308 | 0.373 | 0.138 | 0.193                                      |                                           |
|              |                        | 250   | 3.006 | 3.022 | 2.308 | 0.379 | 0.142 | 0.193                                      |                                           |
|              |                        | 260   | 3.001 | 3.032 | 2.308 | 0.384 | 0.147 | 0.193                                      |                                           |
|              |                        | 270   | 3.040 | 3.041 | 2.308 | 0.389 | 0.151 | 0.193                                      |                                           |
|              |                        | 280   | 3.029 | 3.050 | 2.308 | 0.393 | 0.156 | 0.193                                      |                                           |
|              |                        | 290   | 3.045 | 3.058 | 2.308 | 0.397 | 0.160 | 0.193                                      |                                           |
|              |                        | 300   | 3.044 | 3.066 | 2.308 | 0.401 | 0.164 | 0.193                                      |                                           |
|              |                        | 310   | 3.085 | 3.074 | 2.308 | 0.404 | 0.168 | 0.193                                      |                                           |
|              |                        | 320   | 3.059 | 3.081 | 2.308 | 0.408 | 0.172 | 0.193                                      |                                           |
|              |                        | 330   | 3.086 | 3.088 | 2.308 | 0.411 | 0.176 | 0.193                                      |                                           |
|              |                        | 340   | 3.095 | 3.095 | 2.308 | 0.414 | 0.180 | 0.193                                      |                                           |
| 350          | 3.074                  | 3.102 | 2.308 | 0.416 | 0.184 | 0.193 |       |                                            |                                           |
| 360          | 3.119                  | 3.108 | 2.308 | 0.419 | 0.188 | 0.193 |       |                                            |                                           |
| 370          | 3.116                  | 3.114 | 2.308 | 0.421 | 0.192 | 0.193 |       |                                            |                                           |
| 380          | 3.122                  | 3.120 | 2.308 | 0.423 | 0.196 | 0.193 |       |                                            |                                           |
| 390          | 3.121                  | 3.125 | 2.308 | 0.425 | 0.199 | 0.193 |       |                                            |                                           |
| 400          | 3.118                  | 3.131 | 2.308 | 0.427 | 0.203 | 0.193 |       |                                            |                                           |
|              | $c^{(AFP)} = 5$<br>nM  |       |       |       |       |       |       | $\tilde{c}^{(AFP)} \approx$<br>7.9874 nM   |                                           |
|              | $c^{(PTH)} = 50$<br>nM |       |       |       |       |       |       | $\tilde{c}^{(PTH)} \approx$<br>116.4323 nM |                                           |

|              |                        |       |       |       |       |       |       |                                        |                                        |
|--------------|------------------------|-------|-------|-------|-------|-------|-------|----------------------------------------|----------------------------------------|
|              |                        | 410   | 3.169 | 3.136 | 2.308 | 0.428 | 0.206 | 0.193                                  |                                        |
|              |                        | 420   | 3.130 | 3.141 | 2.308 | 0.430 | 0.210 | 0.193                                  |                                        |
|              |                        | 430   | 3.152 | 3.146 | 2.308 | 0.431 | 0.213 | 0.193                                  |                                        |
|              |                        | 440   | 3.174 | 3.150 | 2.308 | 0.433 | 0.217 | 0.193                                  |                                        |
|              |                        | 450   | 3.163 | 3.155 | 2.308 | 0.434 | 0.220 | 0.193                                  |                                        |
|              |                        | 460   | 3.168 | 3.159 | 2.308 | 0.435 | 0.223 | 0.193                                  |                                        |
|              |                        | 470   | 3.127 | 3.164 | 2.308 | 0.436 | 0.226 | 0.193                                  |                                        |
|              |                        | 480   | 3.154 | 3.168 | 2.308 | 0.437 | 0.230 | 0.193                                  |                                        |
|              |                        | 490   | 3.168 | 3.172 | 2.308 | 0.438 | 0.233 | 0.193                                  |                                        |
|              |                        | 500   | 3.183 | 3.176 | 2.308 | 0.439 | 0.236 | 0.193                                  |                                        |
|              |                        | 510   | 3.157 | 3.180 | 2.308 | 0.440 | 0.239 | 0.193                                  |                                        |
|              |                        | 520   | 3.188 | 3.183 | 2.308 | 0.441 | 0.242 | 0.193                                  |                                        |
|              |                        | 530   | 3.187 | 3.187 | 2.308 | 0.441 | 0.245 | 0.193                                  |                                        |
|              |                        | 540   | 3.173 | 3.190 | 2.308 | 0.442 | 0.247 | 0.193                                  |                                        |
|              |                        | 550   | 3.183 | 3.194 | 2.308 | 0.443 | 0.250 | 0.193                                  |                                        |
|              |                        | 560   | 3.194 | 3.197 | 2.308 | 0.443 | 0.253 | 0.193                                  |                                        |
|              |                        | 570   | 3.213 | 3.200 | 2.308 | 0.444 | 0.256 | 0.193                                  |                                        |
|              |                        | 580   | 3.217 | 3.203 | 2.308 | 0.444 | 0.258 | 0.193                                  |                                        |
|              |                        | 590   | 3.182 | 3.207 | 2.308 | 0.445 | 0.261 | 0.193                                  |                                        |
|              |                        | 600   | 3.218 | 3.210 | 2.308 | 0.445 | 0.264 | 0.193                                  |                                        |
| GFET<br>#S37 | $c^{(CEA)} = 20$<br>nM | -50   | 2.311 | 2.316 | -     | -     | -     | -                                      | $\tilde{c}^{(CEA)} \approx 20.8413$ nM |
|              |                        | -40   | 2.323 | 2.316 |       |       |       |                                        |                                        |
|              |                        | -30   | 2.311 | 2.316 |       |       |       |                                        |                                        |
|              |                        | -20   | 2.303 | 2.316 |       |       |       |                                        |                                        |
|              |                        | -10   | 2.291 | 2.316 |       |       |       |                                        |                                        |
|              | 0                      | 2.313 | 2.316 | 2.316 | 0.000 | 0.000 | 0.000 |                                        |                                        |
|              | 10                     | 2.357 | 2.370 | 2.316 | 0.034 | 0.011 | 0.009 |                                        |                                        |
|              | 20                     | 2.394 | 2.420 | 2.316 | 0.065 | 0.022 | 0.017 |                                        |                                        |
|              | 30                     | 2.471 | 2.467 | 2.316 | 0.094 | 0.033 | 0.024 |                                        |                                        |
|              | 40                     | 2.497 | 2.511 | 2.316 | 0.121 | 0.044 | 0.031 |                                        |                                        |
|              | 50                     | 2.538 | 2.553 | 2.316 | 0.146 | 0.054 | 0.038 |                                        |                                        |
|              | 60                     | 2.599 | 2.592 | 2.316 | 0.168 | 0.064 | 0.044 |                                        |                                        |
|              | 70                     | 2.613 | 2.629 | 2.316 | 0.190 | 0.074 | 0.050 |                                        |                                        |
|              | 80                     | 2.661 | 2.664 | 2.316 | 0.209 | 0.083 | 0.055 |                                        |                                        |
|              | 90                     | 2.682 | 2.696 | 2.316 | 0.227 | 0.093 | 0.060 |                                        |                                        |
|              | 100                    | 2.699 | 2.727 | 2.316 | 0.244 | 0.102 | 0.065 |                                        |                                        |
|              | 110                    | 2.716 | 2.756 | 2.316 | 0.260 | 0.111 | 0.069 |                                        |                                        |
|              | 120                    | 2.768 | 2.783 | 2.316 | 0.274 | 0.120 | 0.073 |                                        |                                        |
|              | 130                    | 2.817 | 2.809 | 2.316 | 0.288 | 0.128 | 0.077 |                                        |                                        |
|              | 140                    | 2.855 | 2.833 | 2.316 | 0.300 | 0.137 | 0.081 |                                        |                                        |
|              | 150                    | 2.842 | 2.856 | 2.316 | 0.311 | 0.145 | 0.084 |                                        |                                        |
|              | 160                    | 2.868 | 2.878 | 2.316 | 0.322 | 0.153 | 0.087 |                                        |                                        |
|              | 170                    | 2.884 | 2.899 | 2.316 | 0.332 | 0.161 | 0.090 |                                        |                                        |
| 180          | 2.918                  | 2.918 | 2.316 | 0.341 | 0.168 | 0.093 |       |                                        |                                        |
| 190          | 2.905                  | 2.937 | 2.316 | 0.349 | 0.176 | 0.096 |       |                                        |                                        |
| 200          | 2.950                  | 2.954 | 2.316 | 0.357 | 0.183 | 0.098 |       |                                        |                                        |
|              | $c^{(AFP)} = 20$<br>nM |       |       |       |       |       |       | $\tilde{c}^{(AFP)} \approx 13.7754$ nM |                                        |
|              | $c^{(PTH)} = 2$<br>nM  |       |       |       |       |       |       | $\tilde{c}^{(PTH)} \approx 4.1533$ nM  |                                        |

|              |                        |     |       |       |       |       |       |       |                                           |   |   |   |                                           |       |       |       |                             |
|--------------|------------------------|-----|-------|-------|-------|-------|-------|-------|-------------------------------------------|---|---|---|-------------------------------------------|-------|-------|-------|-----------------------------|
|              |                        | 210 | 2.950 | 2.971 | 2.316 | 0.364 | 0.190 | 0.100 |                                           |   |   |   |                                           |       |       |       |                             |
|              |                        | 220 | 2.992 | 2.987 | 2.316 | 0.371 | 0.197 | 0.103 |                                           |   |   |   |                                           |       |       |       |                             |
|              |                        | 230 | 3.003 | 3.001 | 2.316 | 0.377 | 0.204 | 0.105 |                                           |   |   |   |                                           |       |       |       |                             |
|              |                        | 240 | 2.989 | 3.016 | 2.316 | 0.382 | 0.211 | 0.106 |                                           |   |   |   |                                           |       |       |       |                             |
|              |                        | 250 | 3.022 | 3.029 | 2.316 | 0.388 | 0.218 | 0.108 |                                           |   |   |   |                                           |       |       |       |                             |
|              |                        | 260 | 3.056 | 3.042 | 2.316 | 0.392 | 0.224 | 0.110 |                                           |   |   |   |                                           |       |       |       |                             |
|              |                        | 270 | 3.043 | 3.055 | 2.316 | 0.397 | 0.230 | 0.111 |                                           |   |   |   |                                           |       |       |       |                             |
|              |                        | 280 | 3.050 | 3.066 | 2.316 | 0.401 | 0.236 | 0.113 |                                           |   |   |   |                                           |       |       |       |                             |
|              |                        | 290 | 3.066 | 3.077 | 2.316 | 0.405 | 0.242 | 0.114 |                                           |   |   |   |                                           |       |       |       |                             |
|              |                        | 300 | 3.079 | 3.088 | 2.316 | 0.408 | 0.248 | 0.115 |                                           |   |   |   |                                           |       |       |       |                             |
|              |                        | 310 | 3.058 | 3.098 | 2.316 | 0.412 | 0.254 | 0.117 |                                           |   |   |   |                                           |       |       |       |                             |
|              |                        | 320 | 3.101 | 3.108 | 2.316 | 0.415 | 0.260 | 0.118 |                                           |   |   |   |                                           |       |       |       |                             |
|              |                        | 330 | 3.116 | 3.117 | 2.316 | 0.418 | 0.265 | 0.119 |                                           |   |   |   |                                           |       |       |       |                             |
|              |                        | 340 | 3.142 | 3.126 | 2.316 | 0.420 | 0.270 | 0.120 |                                           |   |   |   |                                           |       |       |       |                             |
|              |                        | 350 | 3.126 | 3.135 | 2.316 | 0.423 | 0.276 | 0.121 |                                           |   |   |   |                                           |       |       |       |                             |
|              |                        | 360 | 3.127 | 3.143 | 2.316 | 0.425 | 0.281 | 0.121 |                                           |   |   |   |                                           |       |       |       |                             |
|              |                        | 370 | 3.155 | 3.151 | 2.316 | 0.427 | 0.286 | 0.122 |                                           |   |   |   |                                           |       |       |       |                             |
|              |                        | 380 | 3.130 | 3.159 | 2.316 | 0.429 | 0.291 | 0.123 |                                           |   |   |   |                                           |       |       |       |                             |
|              |                        | 390 | 3.151 | 3.166 | 2.316 | 0.431 | 0.296 | 0.124 |                                           |   |   |   |                                           |       |       |       |                             |
|              |                        | 400 | 3.169 | 3.173 | 2.316 | 0.432 | 0.300 | 0.124 |                                           |   |   |   |                                           |       |       |       |                             |
|              |                        | 410 | 3.171 | 3.179 | 2.316 | 0.434 | 0.305 | 0.125 |                                           |   |   |   |                                           |       |       |       |                             |
|              |                        | 420 | 3.165 | 3.186 | 2.316 | 0.435 | 0.309 | 0.125 |                                           |   |   |   |                                           |       |       |       |                             |
|              |                        | 430 | 3.190 | 3.192 | 2.316 | 0.437 | 0.314 | 0.126 |                                           |   |   |   |                                           |       |       |       |                             |
|              |                        | 440 | 3.167 | 3.198 | 2.316 | 0.438 | 0.318 | 0.126 |                                           |   |   |   |                                           |       |       |       |                             |
|              |                        | 450 | 3.175 | 3.204 | 2.316 | 0.439 | 0.322 | 0.127 |                                           |   |   |   |                                           |       |       |       |                             |
|              |                        | 460 | 3.201 | 3.209 | 2.316 | 0.440 | 0.326 | 0.127 |                                           |   |   |   |                                           |       |       |       |                             |
|              |                        | 470 | 3.214 | 3.215 | 2.316 | 0.441 | 0.330 | 0.128 |                                           |   |   |   |                                           |       |       |       |                             |
|              |                        | 480 | 3.213 | 3.220 | 2.316 | 0.442 | 0.334 | 0.128 |                                           |   |   |   |                                           |       |       |       |                             |
|              |                        | 490 | 3.188 | 3.225 | 2.316 | 0.443 | 0.338 | 0.129 |                                           |   |   |   |                                           |       |       |       |                             |
|              |                        | 500 | 3.221 | 3.230 | 2.316 | 0.443 | 0.342 | 0.129 |                                           |   |   |   |                                           |       |       |       |                             |
|              |                        | 510 | 3.248 | 3.234 | 2.316 | 0.444 | 0.345 | 0.129 |                                           |   |   |   |                                           |       |       |       |                             |
|              |                        | 520 | 3.227 | 3.239 | 2.316 | 0.445 | 0.349 | 0.129 |                                           |   |   |   |                                           |       |       |       |                             |
|              |                        | 530 | 3.230 | 3.243 | 2.316 | 0.445 | 0.352 | 0.130 |                                           |   |   |   |                                           |       |       |       |                             |
|              |                        | 540 | 3.248 | 3.248 | 2.316 | 0.446 | 0.356 | 0.130 |                                           |   |   |   |                                           |       |       |       |                             |
|              |                        | 550 | 3.238 | 3.252 | 2.316 | 0.446 | 0.359 | 0.130 |                                           |   |   |   |                                           |       |       |       |                             |
|              |                        | 560 | 3.237 | 3.256 | 2.316 | 0.447 | 0.362 | 0.130 |                                           |   |   |   |                                           |       |       |       |                             |
|              |                        | 570 | 3.266 | 3.260 | 2.316 | 0.447 | 0.366 | 0.131 |                                           |   |   |   |                                           |       |       |       |                             |
|              |                        | 580 | 3.272 | 3.263 | 2.316 | 0.448 | 0.369 | 0.131 |                                           |   |   |   |                                           |       |       |       |                             |
|              |                        | 590 | 3.254 | 3.267 | 2.316 | 0.448 | 0.372 | 0.131 |                                           |   |   |   |                                           |       |       |       |                             |
|              |                        | 600 | 3.263 | 3.270 | 2.316 | 0.448 | 0.375 | 0.131 |                                           |   |   |   |                                           |       |       |       |                             |
| GFET<br>#S38 | $c^{(CEA)} = 20$<br>nM | -50 | 2.328 | 2.317 | -     | -     | -     | -     | $\tilde{c}^{(CEA)} \approx$<br>19.8065 nM |   |   |   |                                           |       |       |       |                             |
|              |                        | -40 | 2.297 | 2.317 |       |       |       |       |                                           |   |   |   |                                           |       |       |       |                             |
|              | $c^{(AFP)} = 20$<br>nM | -30 | 2.317 | 2.317 |       |       |       |       | -                                         | - | - | - | $\tilde{c}^{(AFP)} \approx$<br>16.9843 nM |       |       |       |                             |
|              |                        | -20 | 2.313 | 2.317 |       |       |       |       |                                           |   |   |   |                                           |       |       |       |                             |
|              | $c^{(PTH)} = 5$<br>nM  | -10 | 2.302 | 2.317 |       |       |       |       |                                           |   |   |   | 2.317                                     | 0.000 | 0.000 | 0.000 | $\tilde{c}^{(PTH)} \approx$ |
|              |                        | 0   | 2.286 | 2.317 |       |       |       |       |                                           |   |   |   |                                           |       |       |       |                             |

|  |  |     |       |       |       |       |       |       |            |
|--|--|-----|-------|-------|-------|-------|-------|-------|------------|
|  |  | 10  | 2.369 | 2.381 | 2.317 | 0.032 | 0.013 | 0.019 | 12.4419 nM |
|  |  | 20  | 2.413 | 2.439 | 2.317 | 0.062 | 0.025 | 0.035 |            |
|  |  | 30  | 2.479 | 2.493 | 2.317 | 0.089 | 0.037 | 0.049 |            |
|  |  | 40  | 2.514 | 2.542 | 2.317 | 0.115 | 0.049 | 0.062 |            |
|  |  | 50  | 2.587 | 2.588 | 2.317 | 0.139 | 0.061 | 0.072 |            |
|  |  | 60  | 2.625 | 2.630 | 2.317 | 0.161 | 0.072 | 0.081 |            |
|  |  | 70  | 2.682 | 2.669 | 2.317 | 0.181 | 0.083 | 0.089 |            |
|  |  | 80  | 2.721 | 2.706 | 2.317 | 0.200 | 0.093 | 0.095 |            |
|  |  | 90  | 2.740 | 2.739 | 2.317 | 0.218 | 0.104 | 0.101 |            |
|  |  | 100 | 2.759 | 2.771 | 2.317 | 0.235 | 0.114 | 0.106 |            |
|  |  | 110 | 2.817 | 2.800 | 2.317 | 0.250 | 0.124 | 0.110 |            |
|  |  | 120 | 2.828 | 2.828 | 2.317 | 0.264 | 0.133 | 0.114 |            |
|  |  | 130 | 2.842 | 2.853 | 2.317 | 0.277 | 0.143 | 0.117 |            |
|  |  | 140 | 2.845 | 2.877 | 2.317 | 0.289 | 0.152 | 0.119 |            |
|  |  | 150 | 2.887 | 2.900 | 2.317 | 0.301 | 0.161 | 0.122 |            |
|  |  | 160 | 2.914 | 2.921 | 2.317 | 0.311 | 0.169 | 0.124 |            |
|  |  | 170 | 2.953 | 2.941 | 2.317 | 0.321 | 0.178 | 0.125 |            |
|  |  | 180 | 2.930 | 2.960 | 2.317 | 0.330 | 0.186 | 0.127 |            |
|  |  | 190 | 2.964 | 2.978 | 2.317 | 0.339 | 0.194 | 0.128 |            |
|  |  | 200 | 2.963 | 2.995 | 2.317 | 0.347 | 0.202 | 0.129 |            |
|  |  | 210 | 2.993 | 3.010 | 2.317 | 0.354 | 0.209 | 0.130 |            |
|  |  | 220 | 3.016 | 3.025 | 2.317 | 0.361 | 0.217 | 0.131 |            |
|  |  | 230 | 3.042 | 3.040 | 2.317 | 0.367 | 0.224 | 0.132 |            |
|  |  | 240 | 3.045 | 3.053 | 2.317 | 0.373 | 0.231 | 0.132 |            |
|  |  | 250 | 3.052 | 3.066 | 2.317 | 0.378 | 0.238 | 0.133 |            |
|  |  | 260 | 3.063 | 3.078 | 2.317 | 0.383 | 0.245 | 0.133 |            |
|  |  | 270 | 3.064 | 3.090 | 2.317 | 0.388 | 0.251 | 0.134 |            |
|  |  | 280 | 3.088 | 3.101 | 2.317 | 0.393 | 0.258 | 0.134 |            |
|  |  | 290 | 3.109 | 3.111 | 2.317 | 0.397 | 0.264 | 0.134 |            |
|  |  | 300 | 3.101 | 3.121 | 2.317 | 0.400 | 0.270 | 0.134 |            |
|  |  | 310 | 3.126 | 3.131 | 2.317 | 0.404 | 0.276 | 0.135 |            |
|  |  | 320 | 3.131 | 3.140 | 2.317 | 0.407 | 0.282 | 0.135 |            |
|  |  | 330 | 3.132 | 3.149 | 2.317 | 0.410 | 0.287 | 0.135 |            |
|  |  | 340 | 3.146 | 3.157 | 2.317 | 0.413 | 0.293 | 0.135 |            |
|  |  | 350 | 3.168 | 3.165 | 2.317 | 0.415 | 0.298 | 0.135 |            |
|  |  | 360 | 3.168 | 3.173 | 2.317 | 0.418 | 0.303 | 0.135 |            |
|  |  | 370 | 3.167 | 3.181 | 2.317 | 0.420 | 0.308 | 0.135 |            |
|  |  | 380 | 3.191 | 3.188 | 2.317 | 0.422 | 0.313 | 0.135 |            |
|  |  | 390 | 3.183 | 3.194 | 2.317 | 0.424 | 0.318 | 0.135 |            |
|  |  | 400 | 3.216 | 3.201 | 2.317 | 0.426 | 0.323 | 0.136 |            |
|  |  | 410 | 3.206 | 3.207 | 2.317 | 0.428 | 0.327 | 0.136 |            |
|  |  | 420 | 3.210 | 3.213 | 2.317 | 0.429 | 0.332 | 0.136 |            |
|  |  | 430 | 3.212 | 3.219 | 2.317 | 0.431 | 0.336 | 0.136 |            |
|  |  | 440 | 3.218 | 3.225 | 2.317 | 0.432 | 0.340 | 0.136 |            |
|  |  | 450 | 3.211 | 3.230 | 2.317 | 0.433 | 0.344 | 0.136 |            |
|  |  | 460 | 3.221 | 3.235 | 2.317 | 0.434 | 0.348 | 0.136 |            |



|              |                        |       |       |       |       |       |       |                                           |                                           |
|--------------|------------------------|-------|-------|-------|-------|-------|-------|-------------------------------------------|-------------------------------------------|
|              |                        | 470   | 3.238 | 3.240 | 2.317 | 0.435 | 0.352 | 0.136                                     |                                           |
|              |                        | 480   | 3.237 | 3.245 | 2.317 | 0.436 | 0.356 | 0.136                                     |                                           |
|              |                        | 490   | 3.219 | 3.250 | 2.317 | 0.437 | 0.360 | 0.136                                     |                                           |
|              |                        | 500   | 3.265 | 3.254 | 2.317 | 0.438 | 0.363 | 0.136                                     |                                           |
|              |                        | 510   | 3.272 | 3.259 | 2.317 | 0.439 | 0.367 | 0.136                                     |                                           |
|              |                        | 520   | 3.254 | 3.263 | 2.317 | 0.440 | 0.370 | 0.136                                     |                                           |
|              |                        | 530   | 3.250 | 3.267 | 2.317 | 0.440 | 0.374 | 0.136                                     |                                           |
|              |                        | 540   | 3.256 | 3.271 | 2.317 | 0.441 | 0.377 | 0.136                                     |                                           |
|              |                        | 550   | 3.279 | 3.275 | 2.317 | 0.442 | 0.380 | 0.136                                     |                                           |
|              |                        | 560   | 3.257 | 3.278 | 2.317 | 0.442 | 0.383 | 0.136                                     |                                           |
|              |                        | 570   | 3.270 | 3.282 | 2.317 | 0.443 | 0.386 | 0.136                                     |                                           |
|              |                        | 580   | 3.237 | 3.285 | 2.317 | 0.443 | 0.389 | 0.136                                     |                                           |
|              |                        | 590   | 3.321 | 3.289 | 2.317 | 0.444 | 0.392 | 0.136                                     |                                           |
|              |                        | 600   | 3.272 | 3.292 | 2.317 | 0.444 | 0.395 | 0.136                                     |                                           |
| GFET<br>#S39 | $c^{(CEA)} = 20$<br>nM | -50   | 2.328 | 2.321 | -     | -     | -     | -                                         | $\tilde{c}^{(CEA)} \approx$<br>21.8725 nM |
|              |                        | -40   | 2.309 | 2.321 |       |       |       |                                           |                                           |
|              |                        | -30   | 2.298 | 2.321 |       |       |       |                                           |                                           |
|              |                        | -20   | 2.327 | 2.321 |       |       |       |                                           |                                           |
|              |                        | -10   | 2.325 | 2.321 |       |       |       |                                           |                                           |
|              | 0                      | 2.299 | 2.321 | 2.321 | 0.000 | 0.000 | 0.000 |                                           |                                           |
|              | 10                     | 2.412 | 2.432 | 2.321 | 0.039 | 0.009 | 0.062 |                                           |                                           |
|              | 20                     | 2.497 | 2.513 | 2.321 | 0.075 | 0.019 | 0.098 |                                           |                                           |
|              | 30                     | 2.571 | 2.576 | 2.321 | 0.108 | 0.027 | 0.119 |                                           |                                           |
|              | 40                     | 2.605 | 2.627 | 2.321 | 0.139 | 0.036 | 0.130 |                                           |                                           |
|              | 50                     | 2.671 | 2.670 | 2.321 | 0.167 | 0.045 | 0.137 |                                           |                                           |
|              | 60                     | 2.725 | 2.709 | 2.321 | 0.193 | 0.053 | 0.141 |                                           |                                           |
|              | 70                     | 2.737 | 2.743 | 2.321 | 0.217 | 0.062 | 0.143 |                                           |                                           |
|              | 80                     | 2.792 | 2.775 | 2.321 | 0.239 | 0.070 | 0.144 |                                           |                                           |
|              | 90                     | 2.782 | 2.804 | 2.321 | 0.260 | 0.078 | 0.145 |                                           |                                           |
|              | 100                    | 2.849 | 2.831 | 2.321 | 0.278 | 0.085 | 0.146 |                                           |                                           |
|              | 110                    | 2.855 | 2.856 | 2.321 | 0.296 | 0.093 | 0.146 |                                           |                                           |
|              | 120                    | 2.843 | 2.879 | 2.321 | 0.312 | 0.100 | 0.146 |                                           |                                           |
|              | 130                    | 2.867 | 2.901 | 2.321 | 0.326 | 0.108 | 0.146 |                                           |                                           |
|              | 140                    | 2.927 | 2.922 | 2.321 | 0.340 | 0.115 | 0.146 |                                           |                                           |
|              | 150                    | 2.936 | 2.942 | 2.321 | 0.353 | 0.122 | 0.146 |                                           |                                           |
|              | 160                    | 2.962 | 2.960 | 2.321 | 0.364 | 0.129 | 0.146 |                                           |                                           |
|              | 170                    | 2.976 | 2.978 | 2.321 | 0.375 | 0.135 | 0.146 |                                           |                                           |
|              | 180                    | 2.992 | 2.994 | 2.321 | 0.385 | 0.142 | 0.146 |                                           |                                           |
|              | 190                    | 3.050 | 3.009 | 2.321 | 0.394 | 0.148 | 0.146 |                                           |                                           |
|              | 200                    | 3.020 | 3.024 | 2.321 | 0.402 | 0.154 | 0.146 |                                           |                                           |
| 210          | 3.036                  | 3.038 | 2.321 | 0.410 | 0.161 | 0.146 |       |                                           |                                           |
| 220          | 3.057                  | 3.051 | 2.321 | 0.417 | 0.167 | 0.146 |       |                                           |                                           |
| 230          | 3.078                  | 3.063 | 2.321 | 0.423 | 0.173 | 0.146 |       |                                           |                                           |
| 240          | 3.079                  | 3.075 | 2.321 | 0.429 | 0.178 | 0.146 |       |                                           |                                           |
| 250          | 3.078                  | 3.086 | 2.321 | 0.435 | 0.184 | 0.146 |       |                                           |                                           |
| 260          | 3.093                  | 3.097 | 2.321 | 0.440 | 0.189 | 0.146 |       |                                           |                                           |
|              | $c^{(AFP)} = 20$<br>nM |       |       |       |       |       |       | $\tilde{c}^{(AFP)} \approx$<br>12.2871 nM |                                           |
|              | $c^{(PTH)} = 20$<br>nM |       |       |       |       |       |       | $\tilde{c}^{(PTH)} \approx$<br>52.1734 nM |                                           |

|              |                        |     |       |       |       |       |       |       |                                        |
|--------------|------------------------|-----|-------|-------|-------|-------|-------|-------|----------------------------------------|
|              |                        | 270 | 3.070 | 3.107 | 2.321 | 0.445 | 0.195 | 0.146 |                                        |
|              |                        | 280 | 3.113 | 3.117 | 2.321 | 0.449 | 0.200 | 0.146 |                                        |
|              |                        | 290 | 3.129 | 3.126 | 2.321 | 0.453 | 0.205 | 0.146 |                                        |
|              |                        | 300 | 3.129 | 3.135 | 2.321 | 0.457 | 0.211 | 0.146 |                                        |
|              |                        | 310 | 3.138 | 3.143 | 2.321 | 0.460 | 0.216 | 0.146 |                                        |
|              |                        | 320 | 3.158 | 3.151 | 2.321 | 0.464 | 0.220 | 0.146 |                                        |
|              |                        | 330 | 3.167 | 3.159 | 2.321 | 0.466 | 0.225 | 0.146 |                                        |
|              |                        | 340 | 3.147 | 3.167 | 2.321 | 0.469 | 0.230 | 0.146 |                                        |
|              |                        | 350 | 3.178 | 3.174 | 2.321 | 0.472 | 0.234 | 0.146 |                                        |
|              |                        | 360 | 3.203 | 3.180 | 2.321 | 0.474 | 0.239 | 0.146 |                                        |
|              |                        | 370 | 3.198 | 3.187 | 2.321 | 0.476 | 0.243 | 0.146 |                                        |
|              |                        | 380 | 3.159 | 3.193 | 2.321 | 0.478 | 0.248 | 0.146 |                                        |
|              |                        | 390 | 3.216 | 3.199 | 2.321 | 0.480 | 0.252 | 0.146 |                                        |
|              |                        | 400 | 3.189 | 3.205 | 2.321 | 0.481 | 0.256 | 0.146 |                                        |
|              |                        | 410 | 3.196 | 3.210 | 2.321 | 0.483 | 0.260 | 0.146 |                                        |
|              |                        | 420 | 3.214 | 3.216 | 2.321 | 0.484 | 0.264 | 0.146 |                                        |
|              |                        | 430 | 3.212 | 3.221 | 2.321 | 0.486 | 0.268 | 0.146 |                                        |
|              |                        | 440 | 3.208 | 3.226 | 2.321 | 0.487 | 0.272 | 0.146 |                                        |
|              |                        | 450 | 3.222 | 3.231 | 2.321 | 0.488 | 0.275 | 0.146 |                                        |
|              |                        | 460 | 3.232 | 3.235 | 2.321 | 0.489 | 0.279 | 0.146 |                                        |
|              |                        | 470 | 3.234 | 3.240 | 2.321 | 0.490 | 0.283 | 0.146 |                                        |
|              |                        | 480 | 3.206 | 3.244 | 2.321 | 0.491 | 0.286 | 0.146 |                                        |
|              |                        | 490 | 3.245 | 3.248 | 2.321 | 0.492 | 0.289 | 0.146 |                                        |
|              |                        | 500 | 3.240 | 3.253 | 2.321 | 0.492 | 0.293 | 0.146 |                                        |
|              |                        | 510 | 3.247 | 3.257 | 2.321 | 0.493 | 0.296 | 0.146 |                                        |
|              |                        | 520 | 3.243 | 3.260 | 2.321 | 0.494 | 0.299 | 0.146 |                                        |
|              |                        | 530 | 3.254 | 3.264 | 2.321 | 0.494 | 0.302 | 0.146 |                                        |
|              |                        | 540 | 3.263 | 3.268 | 2.321 | 0.495 | 0.306 | 0.146 |                                        |
|              |                        | 550 | 3.273 | 3.271 | 2.321 | 0.495 | 0.309 | 0.146 |                                        |
|              |                        | 560 | 3.296 | 3.275 | 2.321 | 0.496 | 0.312 | 0.146 |                                        |
|              |                        | 570 | 3.251 | 3.278 | 2.321 | 0.496 | 0.314 | 0.146 |                                        |
|              |                        | 580 | 3.287 | 3.281 | 2.321 | 0.496 | 0.317 | 0.146 |                                        |
|              |                        | 590 | 3.286 | 3.284 | 2.321 | 0.497 | 0.320 | 0.146 |                                        |
|              |                        | 600 | 3.279 | 3.287 | 2.321 | 0.497 | 0.323 | 0.146 |                                        |
| GFET<br>#S40 | $c^{(CEA)} = 20$<br>nM | -50 | 2.325 | 2.340 | -     | -     | -     | -     | $\tilde{c}^{(CEA)} \approx 20.9864$ nM |
|              |                        | -40 | 2.332 | 2.340 |       |       |       |       |                                        |
|              |                        | -30 | 2.336 | 2.340 |       |       |       |       |                                        |
|              |                        | -20 | 2.343 | 2.340 |       |       |       |       |                                        |
|              |                        | -10 | 2.341 | 2.340 |       |       |       |       |                                        |
|              | $c^{(AFP)} = 20$<br>nM | 0   | 2.324 | 2.340 | 2.340 | 0.000 | 0.000 | 0.000 | $\tilde{c}^{(AFP)} \approx 12.2354$ nM |
|              |                        | 10  | 2.489 | 2.488 | 2.340 | 0.036 | 0.010 | 0.103 |                                        |
|              | $c^{(PTH)} = 50$<br>nM | 20  | 2.541 | 2.567 | 2.340 | 0.069 | 0.019 | 0.139 | $\tilde{c}^{(PTH)} \approx 98.7764$ nM |
|              |                        | 30  | 2.622 | 2.621 | 2.340 | 0.100 | 0.029 | 0.152 |                                        |
|              |                        | 40  | 2.657 | 2.663 | 2.340 | 0.128 | 0.038 | 0.157 |                                        |
|              |                        | 50  | 2.708 | 2.700 | 2.340 | 0.155 | 0.047 | 0.159 |                                        |
|              |                        | 60  | 2.731 | 2.733 | 2.340 | 0.179 | 0.055 | 0.159 |                                        |

|     |       |       |       |       |       |       |
|-----|-------|-------|-------|-------|-------|-------|
| 70  | 2.770 | 2.765 | 2.340 | 0.202 | 0.064 | 0.160 |
| 80  | 2.791 | 2.794 | 2.340 | 0.222 | 0.072 | 0.160 |
| 90  | 2.822 | 2.821 | 2.340 | 0.242 | 0.080 | 0.160 |
| 100 | 2.823 | 2.847 | 2.340 | 0.260 | 0.089 | 0.160 |
| 110 | 2.874 | 2.872 | 2.340 | 0.276 | 0.096 | 0.160 |
| 120 | 2.906 | 2.895 | 2.340 | 0.291 | 0.104 | 0.160 |
| 130 | 2.909 | 2.916 | 2.340 | 0.305 | 0.112 | 0.160 |
| 140 | 2.927 | 2.937 | 2.340 | 0.318 | 0.119 | 0.160 |
| 150 | 2.946 | 2.956 | 2.340 | 0.330 | 0.126 | 0.160 |
| 160 | 2.976 | 2.974 | 2.340 | 0.342 | 0.133 | 0.160 |
| 170 | 2.981 | 2.992 | 2.340 | 0.352 | 0.140 | 0.160 |
| 180 | 2.985 | 3.008 | 2.340 | 0.362 | 0.147 | 0.160 |
| 190 | 3.007 | 3.023 | 2.340 | 0.370 | 0.154 | 0.160 |
| 200 | 3.012 | 3.038 | 2.340 | 0.379 | 0.160 | 0.160 |
| 210 | 3.022 | 3.052 | 2.340 | 0.386 | 0.167 | 0.160 |
| 220 | 3.047 | 3.065 | 2.340 | 0.393 | 0.173 | 0.160 |
| 230 | 3.058 | 3.078 | 2.340 | 0.400 | 0.179 | 0.160 |
| 240 | 3.055 | 3.090 | 2.340 | 0.406 | 0.185 | 0.160 |
| 250 | 3.100 | 3.101 | 2.340 | 0.411 | 0.191 | 0.160 |
| 260 | 3.107 | 3.112 | 2.340 | 0.416 | 0.197 | 0.160 |
| 270 | 3.144 | 3.123 | 2.340 | 0.421 | 0.202 | 0.160 |
| 280 | 3.124 | 3.132 | 2.340 | 0.425 | 0.208 | 0.160 |
| 290 | 3.114 | 3.142 | 2.340 | 0.429 | 0.213 | 0.160 |
| 300 | 3.155 | 3.151 | 2.340 | 0.433 | 0.219 | 0.160 |
| 310 | 3.156 | 3.160 | 2.340 | 0.437 | 0.224 | 0.160 |
| 320 | 3.167 | 3.168 | 2.340 | 0.440 | 0.229 | 0.160 |
| 330 | 3.180 | 3.176 | 2.340 | 0.443 | 0.234 | 0.160 |
| 340 | 3.181 | 3.183 | 2.340 | 0.445 | 0.239 | 0.160 |
| 350 | 3.162 | 3.191 | 2.340 | 0.448 | 0.243 | 0.160 |
| 360 | 3.183 | 3.198 | 2.340 | 0.450 | 0.248 | 0.160 |
| 370 | 3.185 | 3.204 | 2.340 | 0.453 | 0.253 | 0.160 |
| 380 | 3.212 | 3.211 | 2.340 | 0.455 | 0.257 | 0.160 |
| 390 | 3.201 | 3.217 | 2.340 | 0.456 | 0.261 | 0.160 |
| 400 | 3.205 | 3.223 | 2.340 | 0.458 | 0.266 | 0.160 |
| 410 | 3.213 | 3.229 | 2.340 | 0.460 | 0.270 | 0.160 |
| 420 | 3.235 | 3.235 | 2.340 | 0.461 | 0.274 | 0.160 |
| 430 | 3.227 | 3.240 | 2.340 | 0.463 | 0.278 | 0.160 |
| 440 | 3.211 | 3.245 | 2.340 | 0.464 | 0.282 | 0.160 |
| 450 | 3.263 | 3.250 | 2.340 | 0.465 | 0.286 | 0.160 |
| 460 | 3.236 | 3.255 | 2.340 | 0.466 | 0.290 | 0.160 |
| 470 | 3.253 | 3.260 | 2.340 | 0.467 | 0.293 | 0.160 |
| 480 | 3.265 | 3.264 | 2.340 | 0.468 | 0.297 | 0.160 |
| 490 | 3.235 | 3.269 | 2.340 | 0.469 | 0.301 | 0.160 |
| 500 | 3.266 | 3.273 | 2.340 | 0.470 | 0.304 | 0.160 |
| 510 | 3.282 | 3.277 | 2.340 | 0.470 | 0.308 | 0.160 |
| 520 | 3.256 | 3.281 | 2.340 | 0.471 | 0.311 | 0.160 |

|              |                                                                           |       |       |       |       |       |       |       |                                                                                                                                    |
|--------------|---------------------------------------------------------------------------|-------|-------|-------|-------|-------|-------|-------|------------------------------------------------------------------------------------------------------------------------------------|
|              |                                                                           | 530   | 3.272 | 3.285 | 2.340 | 0.472 | 0.314 | 0.160 |                                                                                                                                    |
|              |                                                                           | 540   | 3.259 | 3.289 | 2.340 | 0.472 | 0.317 | 0.160 |                                                                                                                                    |
|              |                                                                           | 550   | 3.281 | 3.292 | 2.340 | 0.473 | 0.320 | 0.160 |                                                                                                                                    |
|              |                                                                           | 560   | 3.317 | 3.296 | 2.340 | 0.473 | 0.324 | 0.160 |                                                                                                                                    |
|              |                                                                           | 570   | 3.310 | 3.300 | 2.340 | 0.474 | 0.327 | 0.160 |                                                                                                                                    |
|              |                                                                           | 580   | 3.310 | 3.303 | 2.340 | 0.474 | 0.330 | 0.160 |                                                                                                                                    |
|              |                                                                           | 590   | 3.273 | 3.306 | 2.340 | 0.474 | 0.332 | 0.160 |                                                                                                                                    |
|              |                                                                           | 600   | 3.278 | 3.309 | 2.340 | 0.475 | 0.335 | 0.160 |                                                                                                                                    |
| GFET<br>#S41 | $c^{(CEA)} = 20$<br>nM<br>$c^{(AFP)} = 50$<br>nM<br>$c^{(PTH)} = 2$<br>nM | -50   | 2.285 | 2.288 | -     | -     | -     | -     | $\tilde{c}^{(CEA)} \approx$<br>18.2014 nM<br>$\tilde{c}^{(AFP)} \approx$<br>25.3216 nM<br>$\tilde{c}^{(PTH)} \approx$<br>8.5322 nM |
|              |                                                                           | -40   | 2.270 | 2.288 |       |       |       |       |                                                                                                                                    |
|              |                                                                           | -30   | 2.284 | 2.288 |       |       |       |       |                                                                                                                                    |
|              |                                                                           | -20   | 2.283 | 2.288 |       |       |       |       |                                                                                                                                    |
|              |                                                                           | -10   | 2.265 | 2.288 |       |       |       |       |                                                                                                                                    |
|              |                                                                           | 0     | 2.289 | 2.288 | 2.288 | 0.000 | 0.000 | 0.000 |                                                                                                                                    |
|              |                                                                           | 10    | 2.354 | 2.351 | 2.288 | 0.030 | 0.020 | 0.013 |                                                                                                                                    |
|              |                                                                           | 20    | 2.419 | 2.410 | 2.288 | 0.057 | 0.039 | 0.026 |                                                                                                                                    |
|              |                                                                           | 30    | 2.445 | 2.465 | 2.288 | 0.083 | 0.058 | 0.036 |                                                                                                                                    |
|              |                                                                           | 40    | 2.518 | 2.517 | 2.288 | 0.107 | 0.076 | 0.046 |                                                                                                                                    |
|              |                                                                           | 50    | 2.564 | 2.565 | 2.288 | 0.130 | 0.093 | 0.055 |                                                                                                                                    |
|              |                                                                           | 60    | 2.622 | 2.611 | 2.288 | 0.151 | 0.110 | 0.062 |                                                                                                                                    |
|              |                                                                           | 70    | 2.643 | 2.654 | 2.288 | 0.171 | 0.126 | 0.069 |                                                                                                                                    |
|              |                                                                           | 80    | 2.688 | 2.694 | 2.288 | 0.189 | 0.142 | 0.075 |                                                                                                                                    |
|              |                                                                           | 90    | 2.721 | 2.732 | 2.288 | 0.207 | 0.157 | 0.081 |                                                                                                                                    |
|              |                                                                           | 100   | 2.750 | 2.768 | 2.288 | 0.223 | 0.172 | 0.086 |                                                                                                                                    |
|              |                                                                           | 110   | 2.795 | 2.802 | 2.288 | 0.238 | 0.186 | 0.090 |                                                                                                                                    |
|              |                                                                           | 120   | 2.828 | 2.833 | 2.288 | 0.252 | 0.199 | 0.094 |                                                                                                                                    |
|              |                                                                           | 130   | 2.848 | 2.863 | 2.288 | 0.265 | 0.213 | 0.098 |                                                                                                                                    |
|              |                                                                           | 140   | 2.889 | 2.891 | 2.288 | 0.277 | 0.226 | 0.101 |                                                                                                                                    |
|              |                                                                           | 150   | 2.896 | 2.918 | 2.288 | 0.288 | 0.238 | 0.104 |                                                                                                                                    |
|              |                                                                           | 160   | 2.928 | 2.943 | 2.288 | 0.299 | 0.250 | 0.107 |                                                                                                                                    |
|              |                                                                           | 170   | 2.950 | 2.967 | 2.288 | 0.309 | 0.261 | 0.109 |                                                                                                                                    |
|              |                                                                           | 180   | 2.989 | 2.990 | 2.288 | 0.318 | 0.273 | 0.111 |                                                                                                                                    |
|              |                                                                           | 190   | 2.984 | 3.011 | 2.288 | 0.327 | 0.283 | 0.113 |                                                                                                                                    |
|              |                                                                           | 200   | 3.020 | 3.031 | 2.288 | 0.335 | 0.294 | 0.114 |                                                                                                                                    |
|              |                                                                           | 210   | 3.031 | 3.050 | 2.288 | 0.343 | 0.304 | 0.116 |                                                                                                                                    |
|              |                                                                           | 220   | 3.064 | 3.069 | 2.288 | 0.350 | 0.314 | 0.117 |                                                                                                                                    |
|              |                                                                           | 230   | 3.097 | 3.086 | 2.288 | 0.357 | 0.323 | 0.118 |                                                                                                                                    |
|              |                                                                           | 240   | 3.087 | 3.102 | 2.288 | 0.363 | 0.332 | 0.119 |                                                                                                                                    |
|              |                                                                           | 250   | 3.103 | 3.118 | 2.288 | 0.369 | 0.341 | 0.120 |                                                                                                                                    |
|              |                                                                           | 260   | 3.121 | 3.132 | 2.288 | 0.374 | 0.350 | 0.121 |                                                                                                                                    |
| 270          | 3.134                                                                     | 3.146 | 2.288 | 0.379 | 0.358 | 0.122 |       |       |                                                                                                                                    |
| 280          | 3.146                                                                     | 3.160 | 2.288 | 0.384 | 0.366 | 0.123 |       |       |                                                                                                                                    |
| 290          | 3.151                                                                     | 3.173 | 2.288 | 0.388 | 0.373 | 0.123 |       |       |                                                                                                                                    |
| 300          | 3.168                                                                     | 3.185 | 2.288 | 0.392 | 0.381 | 0.124 |       |       |                                                                                                                                    |
| 310          | 3.197                                                                     | 3.196 | 2.288 | 0.396 | 0.388 | 0.124 |       |       |                                                                                                                                    |
| 320          | 3.198                                                                     | 3.207 | 2.288 | 0.400 | 0.395 | 0.125 |       |       |                                                                                                                                    |

|              |                        |       |       |       |       |       |       |       |                                        |                                        |
|--------------|------------------------|-------|-------|-------|-------|-------|-------|-------|----------------------------------------|----------------------------------------|
|              |                        | 330   | 3.212 | 3.218 | 2.288 | 0.403 | 0.402 | 0.125 |                                        |                                        |
|              |                        | 340   | 3.226 | 3.228 | 2.288 | 0.406 | 0.408 | 0.125 |                                        |                                        |
|              |                        | 350   | 3.214 | 3.237 | 2.288 | 0.409 | 0.414 | 0.126 |                                        |                                        |
|              |                        | 360   | 3.246 | 3.246 | 2.288 | 0.412 | 0.421 | 0.126 |                                        |                                        |
|              |                        | 370   | 3.270 | 3.255 | 2.288 | 0.415 | 0.426 | 0.126 |                                        |                                        |
|              |                        | 380   | 3.267 | 3.263 | 2.288 | 0.417 | 0.432 | 0.126 |                                        |                                        |
|              |                        | 390   | 3.274 | 3.271 | 2.288 | 0.419 | 0.438 | 0.127 |                                        |                                        |
|              |                        | 400   | 3.274 | 3.279 | 2.288 | 0.421 | 0.443 | 0.127 |                                        |                                        |
|              |                        | 410   | 3.285 | 3.286 | 2.288 | 0.423 | 0.448 | 0.127 |                                        |                                        |
|              |                        | 420   | 3.289 | 3.293 | 2.288 | 0.425 | 0.453 | 0.127 |                                        |                                        |
|              |                        | 430   | 3.301 | 3.299 | 2.288 | 0.427 | 0.458 | 0.127 |                                        |                                        |
|              |                        | 440   | 3.294 | 3.306 | 2.288 | 0.428 | 0.462 | 0.127 |                                        |                                        |
|              |                        | 450   | 3.300 | 3.312 | 2.288 | 0.430 | 0.467 | 0.127 |                                        |                                        |
|              |                        | 460   | 3.313 | 3.318 | 2.288 | 0.431 | 0.471 | 0.127 |                                        |                                        |
|              |                        | 470   | 3.315 | 3.323 | 2.288 | 0.433 | 0.475 | 0.128 |                                        |                                        |
|              |                        | 480   | 3.324 | 3.328 | 2.288 | 0.434 | 0.479 | 0.128 |                                        |                                        |
|              |                        | 490   | 3.343 | 3.334 | 2.288 | 0.435 | 0.483 | 0.128 |                                        |                                        |
|              |                        | 500   | 3.345 | 3.338 | 2.288 | 0.436 | 0.487 | 0.128 |                                        |                                        |
|              |                        | 510   | 3.326 | 3.343 | 2.288 | 0.437 | 0.491 | 0.128 |                                        |                                        |
|              |                        | 520   | 3.327 | 3.348 | 2.288 | 0.438 | 0.494 | 0.128 |                                        |                                        |
|              |                        | 530   | 3.334 | 3.352 | 2.288 | 0.439 | 0.498 | 0.128 |                                        |                                        |
|              |                        | 540   | 3.328 | 3.356 | 2.288 | 0.439 | 0.501 | 0.128 |                                        |                                        |
|              |                        | 550   | 3.340 | 3.360 | 2.288 | 0.440 | 0.504 | 0.128 |                                        |                                        |
|              |                        | 560   | 3.365 | 3.364 | 2.288 | 0.441 | 0.507 | 0.128 |                                        |                                        |
|              |                        | 570   | 3.387 | 3.368 | 2.288 | 0.442 | 0.510 | 0.128 |                                        |                                        |
|              |                        | 580   | 3.358 | 3.371 | 2.288 | 0.442 | 0.513 | 0.128 |                                        |                                        |
|              |                        | 590   | 3.394 | 3.374 | 2.288 | 0.443 | 0.516 | 0.128 |                                        |                                        |
|              |                        | 600   | 3.376 | 3.378 | 2.288 | 0.443 | 0.518 | 0.128 |                                        |                                        |
| GFET<br>#S42 | $c^{(CEA)} = 20$<br>nM | -50   | 2.317 | 2.320 | -     | -     | -     | -     | $\tilde{c}^{(CEA)} \approx 20.6544$ nM |                                        |
|              |                        | -40   | 2.330 | 2.320 |       |       |       |       |                                        |                                        |
|              |                        | -30   | 2.308 | 2.320 |       |       |       |       |                                        |                                        |
|              |                        | -20   | 2.331 | 2.320 |       |       |       |       |                                        |                                        |
|              |                        | -10   | 2.337 | 2.320 |       |       |       |       |                                        |                                        |
|              | 0                      | 2.311 | 2.320 | 2.320 | 0.000 | 0.000 | 0.000 |       |                                        |                                        |
|              | $c^{(AFP)} = 50$<br>nM | 10    | 2.364 | 2.393 | 2.320 | 0.034 | 0.019 | 0.021 |                                        | $\tilde{c}^{(AFP)} \approx 25.8776$ nM |
|              |                        | 20    | 2.482 | 2.460 | 2.320 | 0.065 | 0.037 | 0.038 |                                        |                                        |
|              |                        | 30    | 2.517 | 2.521 | 2.320 | 0.094 | 0.054 | 0.053 |                                        |                                        |
|              | $c^{(PTH)} = 5$<br>nM  | 40    | 2.565 | 2.578 | 2.320 | 0.121 | 0.071 | 0.066 |                                        | $\tilde{c}^{(PTH)} \approx 14.0771$ nM |
|              |                        | 50    | 2.631 | 2.630 | 2.320 | 0.146 | 0.088 | 0.076 |                                        |                                        |
|              |                        | 60    | 2.673 | 2.678 | 2.320 | 0.169 | 0.103 | 0.085 |                                        |                                        |
|              |                        | 70    | 2.701 | 2.722 | 2.320 | 0.190 | 0.119 | 0.093 |                                        |                                        |
|              |                        | 80    | 2.756 | 2.763 | 2.320 | 0.210 | 0.133 | 0.099 |                                        |                                        |
|              |                        | 90    | 2.788 | 2.801 | 2.320 | 0.229 | 0.148 | 0.105 |                                        |                                        |
|              |                        | 100   | 2.827 | 2.836 | 2.320 | 0.246 | 0.161 | 0.110 |                                        |                                        |
|              | 110                    | 2.884 | 2.869 | 2.320 | 0.261 | 0.175 | 0.113 |       |                                        |                                        |
|              | 120                    | 2.911 | 2.900 | 2.320 | 0.276 | 0.188 | 0.117 |       |                                        |                                        |

|     |       |       |       |       |       |       |
|-----|-------|-------|-------|-------|-------|-------|
| 130 | 2.920 | 2.928 | 2.320 | 0.289 | 0.200 | 0.120 |
| 140 | 2.957 | 2.955 | 2.320 | 0.302 | 0.212 | 0.122 |
| 150 | 2.976 | 2.980 | 2.320 | 0.313 | 0.223 | 0.124 |
| 160 | 3.000 | 3.004 | 2.320 | 0.324 | 0.235 | 0.126 |
| 170 | 2.998 | 3.026 | 2.320 | 0.334 | 0.245 | 0.127 |
| 180 | 3.031 | 3.047 | 2.320 | 0.343 | 0.256 | 0.128 |
| 190 | 3.066 | 3.066 | 2.320 | 0.352 | 0.266 | 0.129 |
| 200 | 3.089 | 3.085 | 2.320 | 0.359 | 0.276 | 0.130 |
| 210 | 3.107 | 3.102 | 2.320 | 0.367 | 0.285 | 0.131 |
| 220 | 3.112 | 3.119 | 2.320 | 0.373 | 0.294 | 0.131 |
| 230 | 3.128 | 3.134 | 2.320 | 0.380 | 0.303 | 0.132 |
| 240 | 3.126 | 3.149 | 2.320 | 0.385 | 0.311 | 0.132 |
| 250 | 3.168 | 3.163 | 2.320 | 0.391 | 0.320 | 0.133 |
| 260 | 3.186 | 3.176 | 2.320 | 0.396 | 0.328 | 0.133 |
| 270 | 3.202 | 3.189 | 2.320 | 0.400 | 0.335 | 0.133 |
| 280 | 3.182 | 3.200 | 2.320 | 0.405 | 0.343 | 0.134 |
| 290 | 3.210 | 3.212 | 2.320 | 0.409 | 0.350 | 0.134 |
| 300 | 3.202 | 3.222 | 2.320 | 0.412 | 0.357 | 0.134 |
| 310 | 3.211 | 3.233 | 2.320 | 0.416 | 0.363 | 0.134 |
| 320 | 3.225 | 3.242 | 2.320 | 0.419 | 0.370 | 0.134 |
| 330 | 3.223 | 3.252 | 2.320 | 0.422 | 0.376 | 0.134 |
| 340 | 3.233 | 3.260 | 2.320 | 0.424 | 0.382 | 0.134 |
| 350 | 3.269 | 3.269 | 2.320 | 0.427 | 0.388 | 0.134 |
| 360 | 3.246 | 3.277 | 2.320 | 0.429 | 0.393 | 0.134 |
| 370 | 3.277 | 3.284 | 2.320 | 0.431 | 0.399 | 0.135 |
| 380 | 3.292 | 3.291 | 2.320 | 0.433 | 0.404 | 0.135 |
| 390 | 3.273 | 3.298 | 2.320 | 0.435 | 0.409 | 0.135 |
| 400 | 3.312 | 3.305 | 2.320 | 0.437 | 0.414 | 0.135 |
| 410 | 3.289 | 3.311 | 2.320 | 0.438 | 0.419 | 0.135 |
| 420 | 3.323 | 3.317 | 2.320 | 0.440 | 0.423 | 0.135 |
| 430 | 3.328 | 3.323 | 2.320 | 0.441 | 0.428 | 0.135 |
| 440 | 3.322 | 3.329 | 2.320 | 0.442 | 0.432 | 0.135 |
| 450 | 3.335 | 3.334 | 2.320 | 0.444 | 0.436 | 0.135 |
| 460 | 3.339 | 3.339 | 2.320 | 0.445 | 0.440 | 0.135 |
| 470 | 3.337 | 3.344 | 2.320 | 0.446 | 0.444 | 0.135 |
| 480 | 3.339 | 3.348 | 2.320 | 0.447 | 0.448 | 0.135 |
| 490 | 3.362 | 3.353 | 2.320 | 0.447 | 0.451 | 0.135 |
| 500 | 3.356 | 3.357 | 2.320 | 0.448 | 0.455 | 0.135 |
| 510 | 3.368 | 3.361 | 2.320 | 0.449 | 0.458 | 0.135 |
| 520 | 3.366 | 3.365 | 2.320 | 0.450 | 0.461 | 0.135 |
| 530 | 3.379 | 3.369 | 2.320 | 0.450 | 0.464 | 0.135 |
| 540 | 3.370 | 3.372 | 2.320 | 0.451 | 0.467 | 0.135 |
| 550 | 3.353 | 3.376 | 2.320 | 0.451 | 0.470 | 0.135 |
| 560 | 3.363 | 3.379 | 2.320 | 0.452 | 0.473 | 0.135 |
| 570 | 3.394 | 3.382 | 2.320 | 0.452 | 0.476 | 0.135 |
| 580 | 3.371 | 3.385 | 2.320 | 0.453 | 0.478 | 0.135 |

|              |                        |       |       |       |       |       |       |       |                                         |
|--------------|------------------------|-------|-------|-------|-------|-------|-------|-------|-----------------------------------------|
|              |                        | 590   | 3.402 | 3.388 | 2.320 | 0.453 | 0.481 | 0.135 |                                         |
|              |                        | 600   | 3.392 | 3.391 | 2.320 | 0.453 | 0.483 | 0.135 |                                         |
| GFET<br>#S43 | $c^{(CEA)} = 20$<br>nM | -50   | 2.307 | 2.318 | -     | -     | -     | -     | $\bar{c}^{(CEA)} \approx$<br>18.3976 nM |
|              |                        | -40   | 2.325 | 2.318 |       |       |       |       |                                         |
|              |                        | -30   | 2.308 | 2.318 |       |       |       |       |                                         |
|              |                        | -20   | 2.341 | 2.318 |       |       |       |       |                                         |
|              |                        | -10   | 2.313 | 2.318 |       |       |       |       |                                         |
|              |                        | 0     | 2.305 | 2.318 | 2.318 | 0.000 | 0.000 | 0.000 |                                         |
|              |                        | 10    | 2.414 | 2.431 | 2.318 | 0.028 | 0.021 | 0.065 |                                         |
|              |                        | 20    | 2.508 | 2.514 | 2.318 | 0.054 | 0.041 | 0.101 |                                         |
|              |                        | 30    | 2.573 | 2.578 | 2.318 | 0.078 | 0.060 | 0.122 |                                         |
|              |                        | 40    | 2.632 | 2.630 | 2.318 | 0.101 | 0.079 | 0.133 |                                         |
|              |                        | 50    | 2.679 | 2.676 | 2.318 | 0.122 | 0.097 | 0.139 |                                         |
|              |                        | 60    | 2.726 | 2.716 | 2.318 | 0.141 | 0.115 | 0.142 |                                         |
|              |                        | 70    | 2.747 | 2.754 | 2.318 | 0.160 | 0.132 | 0.144 |                                         |
|              |                        | 80    | 2.782 | 2.788 | 2.318 | 0.177 | 0.148 | 0.145 |                                         |
|              |                        | 90    | 2.808 | 2.821 | 2.318 | 0.193 | 0.164 | 0.146 |                                         |
|              |                        | 100   | 2.838 | 2.851 | 2.318 | 0.208 | 0.179 | 0.146 |                                         |
|              |                        | 110   | 2.887 | 2.880 | 2.318 | 0.222 | 0.194 | 0.147 |                                         |
|              |                        | 120   | 2.891 | 2.907 | 2.318 | 0.235 | 0.208 | 0.147 |                                         |
|              |                        | 130   | 2.929 | 2.933 | 2.318 | 0.247 | 0.222 | 0.147 |                                         |
|              |                        | 140   | 2.955 | 2.958 | 2.318 | 0.259 | 0.235 | 0.147 |                                         |
|              |                        | 150   | 2.995 | 2.981 | 2.318 | 0.269 | 0.248 | 0.147 |                                         |
|              |                        | 160   | 3.006 | 3.004 | 2.318 | 0.279 | 0.260 | 0.147 |                                         |
|              |                        | 170   | 3.017 | 3.025 | 2.318 | 0.288 | 0.272 | 0.147 |                                         |
|              |                        | 180   | 3.038 | 3.045 | 2.318 | 0.297 | 0.284 | 0.147 |                                         |
|              |                        | 190   | 3.041 | 3.064 | 2.318 | 0.305 | 0.295 | 0.147 |                                         |
|              |                        | 200   | 3.094 | 3.082 | 2.318 | 0.313 | 0.305 | 0.147 |                                         |
|              |                        | 210   | 3.098 | 3.100 | 2.318 | 0.320 | 0.316 | 0.147 |                                         |
|              |                        | 220   | 3.089 | 3.116 | 2.318 | 0.326 | 0.326 | 0.147 |                                         |
|              |                        | 230   | 3.105 | 3.132 | 2.318 | 0.332 | 0.335 | 0.147 |                                         |
|              |                        | 240   | 3.160 | 3.147 | 2.318 | 0.338 | 0.345 | 0.147 |                                         |
|              |                        | 250   | 3.171 | 3.162 | 2.318 | 0.343 | 0.354 | 0.147 |                                         |
|              |                        | 260   | 3.158 | 3.175 | 2.318 | 0.348 | 0.363 | 0.147 |                                         |
|              |                        | 270   | 3.181 | 3.188 | 2.318 | 0.353 | 0.371 | 0.147 |                                         |
|              |                        | 280   | 3.192 | 3.201 | 2.318 | 0.357 | 0.379 | 0.147 |                                         |
|              |                        | 290   | 3.197 | 3.213 | 2.318 | 0.361 | 0.387 | 0.147 |                                         |
|              |                        | 300   | 3.222 | 3.224 | 2.318 | 0.365 | 0.395 | 0.147 |                                         |
|              |                        | 310   | 3.215 | 3.235 | 2.318 | 0.369 | 0.402 | 0.147 |                                         |
|              |                        | 320   | 3.263 | 3.245 | 2.318 | 0.372 | 0.409 | 0.147 |                                         |
| 330          | 3.261                  | 3.255 | 2.318 | 0.375 | 0.416 | 0.147 |       |       |                                         |
| 340          | 3.271                  | 3.265 | 2.318 | 0.378 | 0.422 | 0.147 |       |       |                                         |
| 350          | 3.258                  | 3.274 | 2.318 | 0.381 | 0.429 | 0.147 |       |       |                                         |
| 360          | 3.290                  | 3.282 | 2.318 | 0.383 | 0.435 | 0.147 |       |       |                                         |
| 370          | 3.272                  | 3.291 | 2.318 | 0.385 | 0.441 | 0.147 |       |       |                                         |
| 380          | 3.312                  | 3.299 | 2.318 | 0.388 | 0.447 | 0.147 |       |       |                                         |
|              | $c^{(AFP)} = 50$<br>nM |       |       |       |       |       |       |       | $\bar{c}^{(AFP)} \approx$<br>26.2645 nM |
|              | $c^{(PTH)} = 20$<br>nM |       |       |       |       |       |       |       | $\bar{c}^{(PTH)} \approx$<br>55.1351 nM |

|              |                        |       |       |       |       |       |       |                                         |                                        |
|--------------|------------------------|-------|-------|-------|-------|-------|-------|-----------------------------------------|----------------------------------------|
|              |                        | 390   | 3.322 | 3.306 | 2.318 | 0.390 | 0.452 | 0.147                                   |                                        |
|              |                        | 400   | 3.305 | 3.313 | 2.318 | 0.392 | 0.457 | 0.147                                   |                                        |
|              |                        | 410   | 3.323 | 3.320 | 2.318 | 0.393 | 0.463 | 0.147                                   |                                        |
|              |                        | 420   | 3.319 | 3.327 | 2.318 | 0.395 | 0.468 | 0.147                                   |                                        |
|              |                        | 430   | 3.311 | 3.333 | 2.318 | 0.397 | 0.472 | 0.147                                   |                                        |
|              |                        | 440   | 3.331 | 3.340 | 2.318 | 0.398 | 0.477 | 0.147                                   |                                        |
|              |                        | 450   | 3.342 | 3.345 | 2.318 | 0.399 | 0.482 | 0.147                                   |                                        |
|              |                        | 460   | 3.349 | 3.351 | 2.318 | 0.401 | 0.486 | 0.147                                   |                                        |
|              |                        | 470   | 3.347 | 3.356 | 2.318 | 0.402 | 0.490 | 0.147                                   |                                        |
|              |                        | 480   | 3.343 | 3.361 | 2.318 | 0.403 | 0.494 | 0.147                                   |                                        |
|              |                        | 490   | 3.352 | 3.366 | 2.318 | 0.404 | 0.498 | 0.147                                   |                                        |
|              |                        | 500   | 3.377 | 3.371 | 2.318 | 0.405 | 0.502 | 0.147                                   |                                        |
|              |                        | 510   | 3.372 | 3.376 | 2.318 | 0.406 | 0.505 | 0.147                                   |                                        |
|              |                        | 520   | 3.382 | 3.380 | 2.318 | 0.407 | 0.509 | 0.147                                   |                                        |
|              |                        | 530   | 3.371 | 3.384 | 2.318 | 0.407 | 0.512 | 0.147                                   |                                        |
|              |                        | 540   | 3.367 | 3.388 | 2.318 | 0.408 | 0.516 | 0.147                                   |                                        |
|              |                        | 550   | 3.377 | 3.392 | 2.318 | 0.409 | 0.519 | 0.147                                   |                                        |
|              |                        | 560   | 3.395 | 3.396 | 2.318 | 0.409 | 0.522 | 0.147                                   |                                        |
|              |                        | 570   | 3.387 | 3.399 | 2.318 | 0.410 | 0.525 | 0.147                                   |                                        |
|              |                        | 580   | 3.382 | 3.403 | 2.318 | 0.411 | 0.528 | 0.147                                   |                                        |
|              |                        | 590   | 3.425 | 3.406 | 2.318 | 0.411 | 0.530 | 0.147                                   |                                        |
|              |                        | 600   | 3.403 | 3.409 | 2.318 | 0.412 | 0.533 | 0.147                                   |                                        |
| GFET<br>#S44 | $c^{(CEA)} = 20$<br>nM | -50   | 2.332 | 2.319 | -     | -     | -     | -                                       | $\tilde{c}^{(CEA)} \approx 21.3091$ nM |
|              |                        | -40   | 2.304 | 2.319 |       |       |       |                                         |                                        |
|              |                        | -30   | 2.311 | 2.319 |       |       |       |                                         |                                        |
|              |                        | -20   | 2.296 | 2.319 |       |       |       |                                         |                                        |
|              |                        | -10   | 2.332 | 2.319 |       |       |       |                                         |                                        |
|              | 0                      | 2.305 | 2.319 | 2.319 | 0.000 | 0.000 | 0.000 |                                         |                                        |
|              | 10                     | 2.460 | 2.476 | 2.319 | 0.036 | 0.019 | 0.102 |                                         |                                        |
|              | 20                     | 2.537 | 2.561 | 2.319 | 0.070 | 0.037 | 0.135 |                                         |                                        |
|              | 30                     | 2.592 | 2.620 | 2.319 | 0.100 | 0.055 | 0.145 |                                         |                                        |
|              | 40                     | 2.643 | 2.669 | 2.319 | 0.129 | 0.072 | 0.149 |                                         |                                        |
|              | 50                     | 2.692 | 2.713 | 2.319 | 0.155 | 0.089 | 0.150 | $\tilde{c}^{(AFP)} \approx 23.7765$ nM  |                                        |
|              | 60                     | 2.750 | 2.753 | 2.319 | 0.179 | 0.105 | 0.150 |                                         |                                        |
|              | 70                     | 2.790 | 2.792 | 2.319 | 0.202 | 0.121 | 0.150 |                                         |                                        |
|              | 80                     | 2.828 | 2.828 | 2.319 | 0.223 | 0.136 | 0.150 | $\tilde{c}^{(PTH)} \approx 109.7643$ nM |                                        |
|              | 90                     | 2.851 | 2.861 | 2.319 | 0.242 | 0.150 | 0.150 |                                         |                                        |
|              | 100                    | 2.897 | 2.893 | 2.319 | 0.260 | 0.165 | 0.150 |                                         |                                        |
|              | 110                    | 2.922 | 2.923 | 2.319 | 0.276 | 0.178 | 0.150 |                                         |                                        |
|              | 120                    | 2.956 | 2.952 | 2.319 | 0.291 | 0.192 | 0.150 |                                         |                                        |
|              | 130                    | 2.986 | 2.979 | 2.319 | 0.305 | 0.204 | 0.150 |                                         |                                        |
|              | 140                    | 3.024 | 3.004 | 2.319 | 0.318 | 0.217 | 0.150 |                                         |                                        |
| 150          | 3.019                  | 3.028 | 2.319 | 0.330 | 0.229 | 0.150 |       |                                         |                                        |
| 160          | 3.053                  | 3.051 | 2.319 | 0.341 | 0.241 | 0.150 |       |                                         |                                        |
| 170          | 3.071                  | 3.072 | 2.319 | 0.351 | 0.252 | 0.150 |       |                                         |                                        |
| 180          | 3.097                  | 3.092 | 2.319 | 0.361 | 0.263 | 0.150 |       |                                         |                                        |



|              |                                                   |     |       |       |       |       |       |       |                                                                                  |
|--------------|---------------------------------------------------|-----|-------|-------|-------|-------|-------|-------|----------------------------------------------------------------------------------|
|              |                                                   | 190 | 3.094 | 3.112 | 2.319 | 0.369 | 0.273 | 0.150 |                                                                                  |
|              |                                                   | 200 | 3.151 | 3.130 | 2.319 | 0.377 | 0.284 | 0.150 |                                                                                  |
|              |                                                   | 210 | 3.161 | 3.147 | 2.319 | 0.385 | 0.293 | 0.150 |                                                                                  |
|              |                                                   | 220 | 3.162 | 3.164 | 2.319 | 0.392 | 0.303 | 0.150 |                                                                                  |
|              |                                                   | 230 | 3.187 | 3.179 | 2.319 | 0.398 | 0.312 | 0.150 |                                                                                  |
|              |                                                   | 240 | 3.207 | 3.194 | 2.319 | 0.404 | 0.321 | 0.150 |                                                                                  |
|              |                                                   | 250 | 3.211 | 3.208 | 2.319 | 0.409 | 0.330 | 0.150 |                                                                                  |
|              |                                                   | 260 | 3.221 | 3.222 | 2.319 | 0.414 | 0.339 | 0.150 |                                                                                  |
|              |                                                   | 270 | 3.244 | 3.235 | 2.319 | 0.419 | 0.347 | 0.150 |                                                                                  |
|              |                                                   | 280 | 3.239 | 3.247 | 2.319 | 0.423 | 0.355 | 0.150 |                                                                                  |
|              |                                                   | 290 | 3.256 | 3.258 | 2.319 | 0.427 | 0.362 | 0.150 |                                                                                  |
|              |                                                   | 300 | 3.224 | 3.269 | 2.319 | 0.431 | 0.370 | 0.150 |                                                                                  |
|              |                                                   | 310 | 3.279 | 3.280 | 2.319 | 0.434 | 0.377 | 0.150 |                                                                                  |
|              |                                                   | 320 | 3.316 | 3.290 | 2.319 | 0.437 | 0.384 | 0.150 |                                                                                  |
|              |                                                   | 330 | 3.307 | 3.299 | 2.319 | 0.440 | 0.390 | 0.150 |                                                                                  |
|              |                                                   | 340 | 3.292 | 3.309 | 2.319 | 0.443 | 0.397 | 0.150 |                                                                                  |
|              |                                                   | 350 | 3.326 | 3.317 | 2.319 | 0.445 | 0.403 | 0.150 |                                                                                  |
|              |                                                   | 360 | 3.322 | 3.326 | 2.319 | 0.447 | 0.409 | 0.150 |                                                                                  |
|              |                                                   | 370 | 3.336 | 3.334 | 2.319 | 0.449 | 0.415 | 0.150 |                                                                                  |
|              |                                                   | 380 | 3.328 | 3.341 | 2.319 | 0.451 | 0.421 | 0.150 |                                                                                  |
|              |                                                   | 390 | 3.345 | 3.349 | 2.319 | 0.453 | 0.427 | 0.150 |                                                                                  |
|              |                                                   | 400 | 3.360 | 3.356 | 2.319 | 0.455 | 0.432 | 0.150 |                                                                                  |
|              |                                                   | 410 | 3.359 | 3.362 | 2.319 | 0.456 | 0.437 | 0.150 |                                                                                  |
|              |                                                   | 420 | 3.371 | 3.369 | 2.319 | 0.458 | 0.442 | 0.150 |                                                                                  |
|              |                                                   | 430 | 3.381 | 3.375 | 2.319 | 0.459 | 0.447 | 0.150 |                                                                                  |
|              |                                                   | 440 | 3.391 | 3.381 | 2.319 | 0.460 | 0.452 | 0.150 |                                                                                  |
|              |                                                   | 450 | 3.381 | 3.387 | 2.319 | 0.461 | 0.456 | 0.150 |                                                                                  |
|              |                                                   | 460 | 3.375 | 3.392 | 2.319 | 0.462 | 0.461 | 0.150 |                                                                                  |
|              |                                                   | 470 | 3.385 | 3.397 | 2.319 | 0.463 | 0.465 | 0.150 |                                                                                  |
|              |                                                   | 480 | 3.389 | 3.402 | 2.319 | 0.464 | 0.469 | 0.150 |                                                                                  |
|              |                                                   | 490 | 3.404 | 3.407 | 2.319 | 0.465 | 0.473 | 0.150 |                                                                                  |
|              |                                                   | 500 | 3.397 | 3.412 | 2.319 | 0.466 | 0.477 | 0.150 |                                                                                  |
|              |                                                   | 510 | 3.419 | 3.416 | 2.319 | 0.466 | 0.481 | 0.150 |                                                                                  |
|              |                                                   | 520 | 3.429 | 3.420 | 2.319 | 0.467 | 0.484 | 0.150 |                                                                                  |
|              |                                                   | 530 | 3.413 | 3.425 | 2.319 | 0.468 | 0.488 | 0.150 |                                                                                  |
|              |                                                   | 540 | 3.422 | 3.428 | 2.319 | 0.468 | 0.491 | 0.150 |                                                                                  |
|              |                                                   | 550 | 3.415 | 3.432 | 2.319 | 0.469 | 0.495 | 0.150 |                                                                                  |
|              |                                                   | 560 | 3.431 | 3.436 | 2.319 | 0.469 | 0.498 | 0.150 |                                                                                  |
|              |                                                   | 570 | 3.431 | 3.439 | 2.319 | 0.470 | 0.501 | 0.150 |                                                                                  |
|              |                                                   | 580 | 3.409 | 3.443 | 2.319 | 0.470 | 0.504 | 0.150 |                                                                                  |
|              |                                                   | 590 | 3.436 | 3.446 | 2.319 | 0.470 | 0.507 | 0.150 |                                                                                  |
|              |                                                   | 600 | 3.425 | 3.449 | 2.319 | 0.471 | 0.510 | 0.150 |                                                                                  |
| GFET<br>#S45 | $c^{(CEA)} = 20$<br>nM<br>$c^{(AFP)} = 100$<br>nM | -50 | 2.324 | 2.334 | -     | -     | -     | -     | $\tilde{c}^{(CEA)} \approx 20.6619$ nM<br>$\tilde{c}^{(AFP)} \approx 49.7633$ nM |
|              |                                                   | -40 | 2.330 | 2.334 |       |       |       |       |                                                                                  |
|              |                                                   | -30 | 2.339 | 2.334 |       |       |       |       |                                                                                  |
|              |                                                   | -20 | 2.336 | 2.334 |       |       |       |       |                                                                                  |

|                       |       |       |       |       |       |       |       |                                        |
|-----------------------|-------|-------|-------|-------|-------|-------|-------|----------------------------------------|
| $c^{(PTH)} = 2$<br>nM | -10   | 2.329 | 2.334 |       |       |       |       | $\bar{c}^{(PTH)} \approx$<br>5.9894 nM |
|                       | 0     | 2.336 | 2.334 | 2.334 | 0.000 | 0.000 | 0.000 |                                        |
|                       | 10    | 2.394 | 2.413 | 2.334 | 0.032 | 0.038 | 0.009 |                                        |
|                       | 20    | 2.469 | 2.487 | 2.334 | 0.061 | 0.075 | 0.017 |                                        |
|                       | 30    | 2.562 | 2.556 | 2.334 | 0.088 | 0.109 | 0.024 |                                        |
|                       | 40    | 2.603 | 2.620 | 2.334 | 0.113 | 0.141 | 0.031 |                                        |
|                       | 50    | 2.680 | 2.680 | 2.334 | 0.137 | 0.172 | 0.038 |                                        |
|                       | 60    | 2.743 | 2.736 | 2.334 | 0.158 | 0.201 | 0.043 |                                        |
|                       | 70    | 2.806 | 2.789 | 2.334 | 0.178 | 0.228 | 0.049 |                                        |
|                       | 80    | 2.818 | 2.838 | 2.334 | 0.197 | 0.253 | 0.054 |                                        |
|                       | 90    | 2.869 | 2.883 | 2.334 | 0.214 | 0.277 | 0.058 |                                        |
|                       | 100   | 2.933 | 2.926 | 2.334 | 0.230 | 0.300 | 0.062 |                                        |
|                       | 110   | 2.959 | 2.966 | 2.334 | 0.244 | 0.322 | 0.066 |                                        |
|                       | 120   | 3.014 | 3.003 | 2.334 | 0.258 | 0.342 | 0.069 |                                        |
|                       | 130   | 3.039 | 3.038 | 2.334 | 0.270 | 0.361 | 0.073 |                                        |
|                       | 140   | 3.072 | 3.071 | 2.334 | 0.282 | 0.379 | 0.075 |                                        |
|                       | 150   | 3.093 | 3.101 | 2.334 | 0.293 | 0.396 | 0.078 |                                        |
|                       | 160   | 3.128 | 3.130 | 2.334 | 0.303 | 0.412 | 0.081 |                                        |
|                       | 170   | 3.127 | 3.157 | 2.334 | 0.312 | 0.427 | 0.083 |                                        |
|                       | 180   | 3.169 | 3.182 | 2.334 | 0.321 | 0.442 | 0.085 |                                        |
|                       | 190   | 3.208 | 3.205 | 2.334 | 0.329 | 0.455 | 0.087 |                                        |
|                       | 200   | 3.225 | 3.227 | 2.334 | 0.336 | 0.468 | 0.089 |                                        |
|                       | 210   | 3.257 | 3.247 | 2.334 | 0.343 | 0.480 | 0.090 |                                        |
|                       | 220   | 3.265 | 3.266 | 2.334 | 0.349 | 0.491 | 0.092 |                                        |
|                       | 230   | 3.305 | 3.284 | 2.334 | 0.355 | 0.502 | 0.093 |                                        |
|                       | 240   | 3.305 | 3.301 | 2.334 | 0.360 | 0.512 | 0.094 |                                        |
|                       | 250   | 3.293 | 3.317 | 2.334 | 0.365 | 0.521 | 0.096 |                                        |
|                       | 260   | 3.308 | 3.331 | 2.334 | 0.370 | 0.530 | 0.097 |                                        |
|                       | 270   | 3.326 | 3.345 | 2.334 | 0.374 | 0.539 | 0.098 |                                        |
|                       | 280   | 3.354 | 3.358 | 2.334 | 0.378 | 0.547 | 0.098 |                                        |
|                       | 290   | 3.367 | 3.370 | 2.334 | 0.382 | 0.554 | 0.099 |                                        |
|                       | 300   | 3.362 | 3.381 | 2.334 | 0.385 | 0.561 | 0.100 |                                        |
|                       | 310   | 3.389 | 3.392 | 2.334 | 0.389 | 0.568 | 0.101 |                                        |
|                       | 320   | 3.406 | 3.402 | 2.334 | 0.392 | 0.574 | 0.101 |                                        |
|                       | 330   | 3.427 | 3.411 | 2.334 | 0.394 | 0.580 | 0.102 |                                        |
|                       | 340   | 3.435 | 3.419 | 2.334 | 0.397 | 0.586 | 0.102 |                                        |
|                       | 350   | 3.430 | 3.428 | 2.334 | 0.399 | 0.591 | 0.103 |                                        |
|                       | 360   | 3.437 | 3.435 | 2.334 | 0.401 | 0.596 | 0.103 |                                        |
|                       | 370   | 3.418 | 3.442 | 2.334 | 0.403 | 0.601 | 0.104 |                                        |
|                       | 380   | 3.459 | 3.449 | 2.334 | 0.405 | 0.606 | 0.104 |                                        |
|                       | 390   | 3.448 | 3.455 | 2.334 | 0.407 | 0.610 | 0.105 |                                        |
|                       | 400   | 3.448 | 3.461 | 2.334 | 0.408 | 0.614 | 0.105 |                                        |
|                       | 410   | 3.487 | 3.467 | 2.334 | 0.410 | 0.617 | 0.105 |                                        |
|                       | 420   | 3.480 | 3.472 | 2.334 | 0.411 | 0.621 | 0.105 |                                        |
| 430                   | 3.469 | 3.477 | 2.334 | 0.412 | 0.624 | 0.106 |       |                                        |
| 440                   | 3.464 | 3.481 | 2.334 | 0.414 | 0.627 | 0.106 |       |                                        |

|              |                        |       |       |       |       |       |       |                                        |                                        |
|--------------|------------------------|-------|-------|-------|-------|-------|-------|----------------------------------------|----------------------------------------|
|              |                        | 450   | 3.471 | 3.485 | 2.334 | 0.415 | 0.630 | 0.106                                  |                                        |
|              |                        | 460   | 3.487 | 3.489 | 2.334 | 0.416 | 0.633 | 0.106                                  |                                        |
|              |                        | 470   | 3.479 | 3.493 | 2.334 | 0.417 | 0.636 | 0.106                                  |                                        |
|              |                        | 480   | 3.517 | 3.497 | 2.334 | 0.417 | 0.638 | 0.107                                  |                                        |
|              |                        | 490   | 3.489 | 3.500 | 2.334 | 0.418 | 0.641 | 0.107                                  |                                        |
|              |                        | 500   | 3.490 | 3.503 | 2.334 | 0.419 | 0.643 | 0.107                                  |                                        |
|              |                        | 510   | 3.502 | 3.506 | 2.334 | 0.420 | 0.645 | 0.107                                  |                                        |
|              |                        | 520   | 3.492 | 3.509 | 2.334 | 0.420 | 0.647 | 0.107                                  |                                        |
|              |                        | 530   | 3.503 | 3.511 | 2.334 | 0.421 | 0.649 | 0.107                                  |                                        |
|              |                        | 540   | 3.508 | 3.514 | 2.334 | 0.421 | 0.651 | 0.107                                  |                                        |
|              |                        | 550   | 3.516 | 3.516 | 2.334 | 0.422 | 0.652 | 0.107                                  |                                        |
|              |                        | 560   | 3.521 | 3.518 | 2.334 | 0.422 | 0.654 | 0.108                                  |                                        |
|              |                        | 570   | 3.509 | 3.520 | 2.334 | 0.423 | 0.655 | 0.108                                  |                                        |
|              |                        | 580   | 3.506 | 3.522 | 2.334 | 0.423 | 0.657 | 0.108                                  |                                        |
|              |                        | 590   | 3.498 | 3.524 | 2.334 | 0.424 | 0.658 | 0.108                                  |                                        |
|              |                        | 600   | 3.509 | 3.525 | 2.334 | 0.424 | 0.659 | 0.108                                  |                                        |
| GFET<br>#S46 | $c^{(CEA)} = 20$<br>nM | -50   | 2.317 | 2.318 | -     | -     | -     | -                                      | $\tilde{c}^{(CEA)} \approx 18.7603$ nM |
|              |                        | -40   | 2.330 | 2.318 |       |       |       |                                        |                                        |
|              |                        | -30   | 2.320 | 2.318 |       |       |       |                                        |                                        |
|              |                        | -20   | 2.323 | 2.318 |       |       |       |                                        |                                        |
|              |                        | -10   | 2.321 | 2.318 |       |       |       |                                        |                                        |
|              | 0                      | 2.329 | 2.318 | 2.318 | 0.000 | 0.000 | 0.000 |                                        |                                        |
|              | 10                     | 2.378 | 2.399 | 2.318 | 0.030 | 0.033 | 0.017 |                                        |                                        |
|              | 20                     | 2.477 | 2.474 | 2.318 | 0.059 | 0.065 | 0.032 |                                        |                                        |
|              | 30                     | 2.544 | 2.543 | 2.318 | 0.085 | 0.095 | 0.044 |                                        |                                        |
|              | 40                     | 2.617 | 2.606 | 2.318 | 0.110 | 0.123 | 0.055 |                                        |                                        |
|              | 50                     | 2.659 | 2.665 | 2.318 | 0.133 | 0.150 | 0.064 |                                        |                                        |
|              | 60                     | 2.728 | 2.719 | 2.318 | 0.154 | 0.175 | 0.072 |                                        |                                        |
|              | 70                     | 2.746 | 2.770 | 2.318 | 0.174 | 0.199 | 0.078 |                                        |                                        |
|              | 80                     | 2.817 | 2.816 | 2.318 | 0.193 | 0.221 | 0.084 |                                        |                                        |
|              | 90                     | 2.854 | 2.860 | 2.318 | 0.210 | 0.243 | 0.089 | $\tilde{c}^{(AFP)} \approx 47.8803$ nM |                                        |
|              | 100                    | 2.912 | 2.900 | 2.318 | 0.226 | 0.263 | 0.093 |                                        |                                        |
|              | 110                    | 2.944 | 2.938 | 2.318 | 0.241 | 0.282 | 0.097 | $\tilde{c}^{(PTH)} \approx 13.2231$ nM |                                        |
|              | 120                    | 2.950 | 2.973 | 2.318 | 0.256 | 0.300 | 0.100 |                                        |                                        |
|              | 130                    | 3.003 | 3.006 | 2.318 | 0.269 | 0.317 | 0.102 |                                        |                                        |
|              | 140                    | 3.026 | 3.036 | 2.318 | 0.281 | 0.333 | 0.104 |                                        |                                        |
|              | 150                    | 3.071 | 3.065 | 2.318 | 0.292 | 0.348 | 0.106 |                                        |                                        |
|              | 160                    | 3.057 | 3.091 | 2.318 | 0.303 | 0.362 | 0.108 |                                        |                                        |
|              | 170                    | 3.098 | 3.116 | 2.318 | 0.313 | 0.376 | 0.109 |                                        |                                        |
|              | 180                    | 3.146 | 3.139 | 2.318 | 0.322 | 0.389 | 0.110 |                                        |                                        |
| 190          | 3.164                  | 3.161 | 2.318 | 0.331 | 0.401 | 0.111 |       |                                        |                                        |
| 200          | 3.166                  | 3.181 | 2.318 | 0.339 | 0.412 | 0.112 |       |                                        |                                        |
| 210          | 3.197                  | 3.200 | 2.318 | 0.346 | 0.423 | 0.113 |       |                                        |                                        |
| 220          | 3.214                  | 3.218 | 2.318 | 0.353 | 0.433 | 0.113 |       |                                        |                                        |
| 230          | 3.239                  | 3.235 | 2.318 | 0.360 | 0.443 | 0.114 |       |                                        |                                        |
| 240          | 3.219                  | 3.251 | 2.318 | 0.366 | 0.452 | 0.114 |       |                                        |                                        |

|              |                         |       |       |       |       |       |       |       |                                           |
|--------------|-------------------------|-------|-------|-------|-------|-------|-------|-------|-------------------------------------------|
|              |                         | 250   | 3.248 | 3.265 | 2.318 | 0.371 | 0.461 | 0.115 |                                           |
|              |                         | 260   | 3.291 | 3.279 | 2.318 | 0.377 | 0.469 | 0.115 |                                           |
|              |                         | 270   | 3.283 | 3.292 | 2.318 | 0.382 | 0.477 | 0.115 |                                           |
|              |                         | 280   | 3.297 | 3.304 | 2.318 | 0.386 | 0.484 | 0.116 |                                           |
|              |                         | 290   | 3.302 | 3.315 | 2.318 | 0.391 | 0.491 | 0.116 |                                           |
|              |                         | 300   | 3.324 | 3.326 | 2.318 | 0.395 | 0.497 | 0.116 |                                           |
|              |                         | 310   | 3.358 | 3.336 | 2.318 | 0.398 | 0.504 | 0.116 |                                           |
|              |                         | 320   | 3.353 | 3.346 | 2.318 | 0.402 | 0.509 | 0.116 |                                           |
|              |                         | 330   | 3.366 | 3.354 | 2.318 | 0.405 | 0.515 | 0.116 |                                           |
|              |                         | 340   | 3.376 | 3.363 | 2.318 | 0.408 | 0.520 | 0.116 |                                           |
|              |                         | 350   | 3.349 | 3.370 | 2.318 | 0.411 | 0.525 | 0.116 |                                           |
|              |                         | 360   | 3.366 | 3.378 | 2.318 | 0.413 | 0.530 | 0.117 |                                           |
|              |                         | 370   | 3.396 | 3.385 | 2.318 | 0.416 | 0.534 | 0.117 |                                           |
|              |                         | 380   | 3.386 | 3.391 | 2.318 | 0.418 | 0.538 | 0.117 |                                           |
|              |                         | 390   | 3.397 | 3.397 | 2.318 | 0.420 | 0.542 | 0.117 |                                           |
|              |                         | 400   | 3.408 | 3.403 | 2.318 | 0.422 | 0.546 | 0.117 |                                           |
|              |                         | 410   | 3.412 | 3.408 | 2.318 | 0.424 | 0.549 | 0.117 |                                           |
|              |                         | 420   | 3.419 | 3.413 | 2.318 | 0.426 | 0.553 | 0.117 |                                           |
|              |                         | 430   | 3.418 | 3.418 | 2.318 | 0.427 | 0.556 | 0.117 |                                           |
|              |                         | 440   | 3.412 | 3.423 | 2.318 | 0.429 | 0.559 | 0.117 |                                           |
|              |                         | 450   | 3.420 | 3.427 | 2.318 | 0.430 | 0.562 | 0.117 |                                           |
|              |                         | 460   | 3.418 | 3.431 | 2.318 | 0.432 | 0.564 | 0.117 |                                           |
|              |                         | 470   | 3.417 | 3.435 | 2.318 | 0.433 | 0.567 | 0.117 |                                           |
|              |                         | 480   | 3.425 | 3.438 | 2.318 | 0.434 | 0.569 | 0.117 |                                           |
|              |                         | 490   | 3.442 | 3.441 | 2.318 | 0.435 | 0.571 | 0.117 |                                           |
|              |                         | 500   | 3.451 | 3.444 | 2.318 | 0.436 | 0.573 | 0.117 |                                           |
|              |                         | 510   | 3.438 | 3.447 | 2.318 | 0.437 | 0.575 | 0.117 |                                           |
|              |                         | 520   | 3.449 | 3.450 | 2.318 | 0.438 | 0.577 | 0.117 |                                           |
|              |                         | 530   | 3.433 | 3.453 | 2.318 | 0.439 | 0.579 | 0.117 |                                           |
|              |                         | 540   | 3.470 | 3.455 | 2.318 | 0.439 | 0.581 | 0.117 |                                           |
|              |                         | 550   | 3.450 | 3.457 | 2.318 | 0.440 | 0.582 | 0.117 |                                           |
|              |                         | 560   | 3.462 | 3.460 | 2.318 | 0.441 | 0.584 | 0.117 |                                           |
|              |                         | 570   | 3.450 | 3.462 | 2.318 | 0.441 | 0.585 | 0.117 |                                           |
|              |                         | 580   | 3.470 | 3.464 | 2.318 | 0.442 | 0.587 | 0.117 |                                           |
|              |                         | 590   | 3.479 | 3.465 | 2.318 | 0.442 | 0.588 | 0.117 |                                           |
|              |                         | 600   | 3.449 | 3.467 | 2.318 | 0.443 | 0.589 | 0.117 |                                           |
| GFET<br>#S47 | $c^{(CEA)} = 20$<br>nM  | -50   | 2.286 | 2.309 | -     | -     | -     | -     | $\tilde{c}^{(CEA)} \approx$<br>20.1764 nM |
|              |                         | -40   | 2.296 | 2.309 |       |       |       |       |                                           |
|              |                         | -30   | 2.307 | 2.309 |       |       |       |       |                                           |
|              |                         | -20   | 2.301 | 2.309 |       |       |       |       |                                           |
|              | $c^{(AFP)} =$<br>100 nM | -10   | 2.297 | 2.309 | 2.309 | 0.000 | 0.000 | 0.000 | $\tilde{c}^{(AFP)} \approx$<br>49.7609 nM |
|              |                         | 0     | 2.324 | 2.309 |       |       |       |       |                                           |
|              | $c^{(PTH)} = 20$<br>nM  | 10    | 2.429 | 2.424 | 2.309 | 0.031 | 0.036 | 0.047 | $\tilde{c}^{(PTH)} \approx$<br>42.7654 nM |
|              |                         | 20    | 2.516 | 2.517 | 2.309 | 0.060 | 0.070 | 0.077 |                                           |
|              |                         | 30    | 2.584 | 2.595 | 2.309 | 0.087 | 0.103 | 0.096 |                                           |
| 40           |                         | 2.646 | 2.663 | 2.309 | 0.112 | 0.133 | 0.108 |       |                                           |

|     |       |       |       |       |       |       |
|-----|-------|-------|-------|-------|-------|-------|
| 50  | 2.712 | 2.722 | 2.309 | 0.136 | 0.162 | 0.116 |
| 60  | 2.791 | 2.775 | 2.309 | 0.157 | 0.189 | 0.120 |
| 70  | 2.836 | 2.824 | 2.309 | 0.177 | 0.214 | 0.123 |
| 80  | 2.852 | 2.868 | 2.309 | 0.196 | 0.238 | 0.125 |
| 90  | 2.900 | 2.909 | 2.309 | 0.213 | 0.261 | 0.126 |
| 100 | 2.967 | 2.948 | 2.309 | 0.229 | 0.283 | 0.127 |
| 110 | 2.995 | 2.983 | 2.309 | 0.243 | 0.303 | 0.128 |
| 120 | 3.016 | 3.016 | 2.309 | 0.257 | 0.322 | 0.128 |
| 130 | 3.024 | 3.047 | 2.309 | 0.270 | 0.340 | 0.128 |
| 140 | 3.086 | 3.076 | 2.309 | 0.282 | 0.357 | 0.128 |
| 150 | 3.113 | 3.103 | 2.309 | 0.293 | 0.373 | 0.128 |
| 160 | 3.120 | 3.128 | 2.309 | 0.303 | 0.388 | 0.128 |
| 170 | 3.141 | 3.152 | 2.309 | 0.312 | 0.402 | 0.128 |
| 180 | 3.175 | 3.174 | 2.309 | 0.321 | 0.416 | 0.128 |
| 190 | 3.181 | 3.195 | 2.309 | 0.329 | 0.429 | 0.128 |
| 200 | 3.202 | 3.215 | 2.309 | 0.337 | 0.441 | 0.128 |
| 210 | 3.226 | 3.233 | 2.309 | 0.344 | 0.452 | 0.128 |
| 220 | 3.251 | 3.250 | 2.309 | 0.350 | 0.463 | 0.128 |
| 230 | 3.267 | 3.266 | 2.309 | 0.356 | 0.473 | 0.128 |
| 240 | 3.261 | 3.281 | 2.309 | 0.362 | 0.482 | 0.128 |
| 250 | 3.281 | 3.295 | 2.309 | 0.367 | 0.491 | 0.128 |
| 260 | 3.312 | 3.309 | 2.309 | 0.372 | 0.499 | 0.128 |
| 270 | 3.322 | 3.321 | 2.309 | 0.376 | 0.507 | 0.128 |
| 280 | 3.312 | 3.333 | 2.309 | 0.380 | 0.515 | 0.128 |
| 290 | 3.369 | 3.344 | 2.309 | 0.384 | 0.522 | 0.128 |
| 300 | 3.352 | 3.354 | 2.309 | 0.388 | 0.529 | 0.128 |
| 310 | 3.328 | 3.363 | 2.309 | 0.391 | 0.535 | 0.128 |
| 320 | 3.359 | 3.372 | 2.309 | 0.394 | 0.541 | 0.128 |
| 330 | 3.400 | 3.381 | 2.309 | 0.397 | 0.547 | 0.128 |
| 340 | 3.373 | 3.389 | 2.309 | 0.399 | 0.552 | 0.128 |
| 350 | 3.399 | 3.396 | 2.309 | 0.402 | 0.557 | 0.128 |
| 360 | 3.385 | 3.403 | 2.309 | 0.404 | 0.562 | 0.128 |
| 370 | 3.411 | 3.410 | 2.309 | 0.406 | 0.566 | 0.128 |
| 380 | 3.425 | 3.416 | 2.309 | 0.408 | 0.570 | 0.128 |
| 390 | 3.412 | 3.422 | 2.309 | 0.410 | 0.574 | 0.128 |
| 400 | 3.414 | 3.427 | 2.309 | 0.412 | 0.578 | 0.128 |
| 410 | 3.422 | 3.432 | 2.309 | 0.413 | 0.581 | 0.128 |
| 420 | 3.448 | 3.437 | 2.309 | 0.415 | 0.585 | 0.128 |
| 430 | 3.424 | 3.441 | 2.309 | 0.416 | 0.588 | 0.128 |
| 440 | 3.447 | 3.446 | 2.309 | 0.417 | 0.591 | 0.128 |
| 450 | 3.440 | 3.449 | 2.309 | 0.418 | 0.594 | 0.128 |
| 460 | 3.445 | 3.453 | 2.309 | 0.419 | 0.596 | 0.128 |
| 470 | 3.453 | 3.457 | 2.309 | 0.420 | 0.599 | 0.128 |
| 480 | 3.452 | 3.460 | 2.309 | 0.421 | 0.601 | 0.128 |
| 490 | 3.475 | 3.463 | 2.309 | 0.422 | 0.603 | 0.128 |
| 500 | 3.444 | 3.466 | 2.309 | 0.423 | 0.605 | 0.128 |

|              |                                                                             |       |       |       |       |       |       |       |                                                                                                                             |
|--------------|-----------------------------------------------------------------------------|-------|-------|-------|-------|-------|-------|-------|-----------------------------------------------------------------------------------------------------------------------------|
|              |                                                                             | 510   | 3.469 | 3.469 | 2.309 | 0.424 | 0.607 | 0.128 |                                                                                                                             |
|              |                                                                             | 520   | 3.478 | 3.471 | 2.309 | 0.424 | 0.609 | 0.128 |                                                                                                                             |
|              |                                                                             | 530   | 3.457 | 3.473 | 2.309 | 0.425 | 0.611 | 0.128 |                                                                                                                             |
|              |                                                                             | 540   | 3.466 | 3.476 | 2.309 | 0.426 | 0.613 | 0.128 |                                                                                                                             |
|              |                                                                             | 550   | 3.491 | 3.478 | 2.309 | 0.426 | 0.614 | 0.128 |                                                                                                                             |
|              |                                                                             | 560   | 3.472 | 3.480 | 2.309 | 0.427 | 0.616 | 0.128 |                                                                                                                             |
|              |                                                                             | 570   | 3.475 | 3.482 | 2.309 | 0.427 | 0.617 | 0.128 |                                                                                                                             |
|              |                                                                             | 580   | 3.489 | 3.483 | 2.309 | 0.427 | 0.618 | 0.128 |                                                                                                                             |
|              |                                                                             | 590   | 3.470 | 3.485 | 2.309 | 0.428 | 0.620 | 0.128 |                                                                                                                             |
|              |                                                                             | 600   | 3.482 | 3.487 | 2.309 | 0.428 | 0.621 | 0.128 |                                                                                                                             |
| GFET<br>#S48 | $c^{(CEA)} = 20$<br>nM<br>$c^{(AFP)} = 100$<br>nM<br>$c^{(PTH)} = 50$<br>nM | -50   | 2.307 | 2.318 | -     | -     | -     | -     | $\tilde{c}^{(CEA)} \approx 18.7933$ nM<br>$\tilde{c}^{(AFP)} \approx 50.3235$ nM<br>$\tilde{c}^{(PTH)} \approx 104.6322$ nM |
|              |                                                                             | -40   | 2.297 | 2.318 |       |       |       |       |                                                                                                                             |
|              |                                                                             | -30   | 2.304 | 2.318 |       |       |       |       |                                                                                                                             |
|              |                                                                             | -20   | 2.307 | 2.318 |       |       |       |       |                                                                                                                             |
|              |                                                                             | -10   | 2.308 | 2.318 |       |       |       |       |                                                                                                                             |
|              |                                                                             | 0     | 2.305 | 2.318 | 2.318 | 0.000 | 0.000 | 0.000 |                                                                                                                             |
|              |                                                                             | 10    | 2.465 | 2.472 | 2.318 | 0.031 | 0.035 | 0.088 |                                                                                                                             |
|              |                                                                             | 20    | 2.552 | 2.563 | 2.318 | 0.060 | 0.067 | 0.117 |                                                                                                                             |
|              |                                                                             | 30    | 2.609 | 2.631 | 2.318 | 0.087 | 0.098 | 0.127 |                                                                                                                             |
|              |                                                                             | 40    | 2.690 | 2.689 | 2.318 | 0.113 | 0.127 | 0.130 |                                                                                                                             |
|              |                                                                             | 50    | 2.750 | 2.741 | 2.318 | 0.136 | 0.155 | 0.132 |                                                                                                                             |
|              |                                                                             | 60    | 2.803 | 2.789 | 2.318 | 0.158 | 0.181 | 0.132 |                                                                                                                             |
|              |                                                                             | 70    | 2.836 | 2.834 | 2.318 | 0.179 | 0.205 | 0.132 |                                                                                                                             |
|              |                                                                             | 80    | 2.852 | 2.876 | 2.318 | 0.198 | 0.228 | 0.132 |                                                                                                                             |
|              |                                                                             | 90    | 2.924 | 2.915 | 2.318 | 0.215 | 0.250 | 0.132 |                                                                                                                             |
|              |                                                                             | 100   | 2.950 | 2.952 | 2.318 | 0.232 | 0.270 | 0.132 |                                                                                                                             |
|              |                                                                             | 110   | 2.991 | 2.987 | 2.318 | 0.247 | 0.289 | 0.132 |                                                                                                                             |
|              |                                                                             | 120   | 3.012 | 3.020 | 2.318 | 0.262 | 0.307 | 0.132 |                                                                                                                             |
|              |                                                                             | 130   | 3.027 | 3.050 | 2.318 | 0.275 | 0.325 | 0.132 |                                                                                                                             |
|              |                                                                             | 140   | 3.077 | 3.079 | 2.318 | 0.288 | 0.341 | 0.132 |                                                                                                                             |
|              |                                                                             | 150   | 3.091 | 3.106 | 2.318 | 0.299 | 0.356 | 0.132 |                                                                                                                             |
|              |                                                                             | 160   | 3.118 | 3.131 | 2.318 | 0.310 | 0.370 | 0.132 |                                                                                                                             |
|              |                                                                             | 170   | 3.140 | 3.155 | 2.318 | 0.320 | 0.384 | 0.132 |                                                                                                                             |
|              |                                                                             | 180   | 3.152 | 3.177 | 2.318 | 0.330 | 0.397 | 0.132 |                                                                                                                             |
|              |                                                                             | 190   | 3.220 | 3.198 | 2.318 | 0.339 | 0.409 | 0.132 |                                                                                                                             |
|              |                                                                             | 200   | 3.225 | 3.217 | 2.318 | 0.347 | 0.420 | 0.132 |                                                                                                                             |
|              |                                                                             | 210   | 3.232 | 3.236 | 2.318 | 0.355 | 0.431 | 0.132 |                                                                                                                             |
|              |                                                                             | 220   | 3.227 | 3.253 | 2.318 | 0.362 | 0.441 | 0.132 |                                                                                                                             |
|              |                                                                             | 230   | 3.289 | 3.269 | 2.318 | 0.368 | 0.450 | 0.132 |                                                                                                                             |
|              |                                                                             | 240   | 3.282 | 3.284 | 2.318 | 0.375 | 0.459 | 0.132 |                                                                                                                             |
| 250          | 3.297                                                                       | 3.298 | 2.318 | 0.380 | 0.468 | 0.132 |       |       |                                                                                                                             |
| 260          | 3.293                                                                       | 3.312 | 2.318 | 0.386 | 0.476 | 0.132 |       |       |                                                                                                                             |
| 270          | 3.323                                                                       | 3.324 | 2.318 | 0.391 | 0.483 | 0.132 |       |       |                                                                                                                             |
| 280          | 3.334                                                                       | 3.336 | 2.318 | 0.396 | 0.490 | 0.132 |       |       |                                                                                                                             |
| 290          | 3.336                                                                       | 3.347 | 2.318 | 0.400 | 0.497 | 0.132 |       |       |                                                                                                                             |
| 300          | 3.343                                                                       | 3.358 | 2.318 | 0.404 | 0.503 | 0.132 |       |       |                                                                                                                             |

|              |                        |       |       |       |       |       |       |       |                                           |
|--------------|------------------------|-------|-------|-------|-------|-------|-------|-------|-------------------------------------------|
|              |                        | 310   | 3.363 | 3.367 | 2.318 | 0.408 | 0.509 | 0.132 |                                           |
|              |                        | 320   | 3.397 | 3.376 | 2.318 | 0.411 | 0.515 | 0.132 |                                           |
|              |                        | 330   | 3.396 | 3.385 | 2.318 | 0.415 | 0.520 | 0.132 |                                           |
|              |                        | 340   | 3.386 | 3.393 | 2.318 | 0.418 | 0.525 | 0.132 |                                           |
|              |                        | 350   | 3.370 | 3.401 | 2.318 | 0.421 | 0.530 | 0.132 |                                           |
|              |                        | 360   | 3.417 | 3.408 | 2.318 | 0.423 | 0.534 | 0.132 |                                           |
|              |                        | 370   | 3.408 | 3.414 | 2.318 | 0.426 | 0.538 | 0.132 |                                           |
|              |                        | 380   | 3.424 | 3.421 | 2.318 | 0.428 | 0.542 | 0.132 |                                           |
|              |                        | 390   | 3.425 | 3.427 | 2.318 | 0.430 | 0.546 | 0.132 |                                           |
|              |                        | 400   | 3.429 | 3.432 | 2.318 | 0.432 | 0.549 | 0.132 |                                           |
|              |                        | 410   | 3.451 | 3.437 | 2.318 | 0.434 | 0.553 | 0.132 |                                           |
|              |                        | 420   | 3.449 | 3.442 | 2.318 | 0.436 | 0.556 | 0.132 |                                           |
|              |                        | 430   | 3.451 | 3.447 | 2.318 | 0.438 | 0.559 | 0.132 |                                           |
|              |                        | 440   | 3.449 | 3.451 | 2.318 | 0.439 | 0.562 | 0.132 |                                           |
|              |                        | 450   | 3.454 | 3.455 | 2.318 | 0.441 | 0.564 | 0.132 |                                           |
|              |                        | 460   | 3.437 | 3.459 | 2.318 | 0.442 | 0.567 | 0.132 |                                           |
|              |                        | 470   | 3.450 | 3.462 | 2.318 | 0.443 | 0.569 | 0.132 |                                           |
|              |                        | 480   | 3.449 | 3.466 | 2.318 | 0.444 | 0.571 | 0.132 |                                           |
|              |                        | 490   | 3.478 | 3.469 | 2.318 | 0.445 | 0.573 | 0.132 |                                           |
|              |                        | 500   | 3.471 | 3.472 | 2.318 | 0.446 | 0.575 | 0.132 |                                           |
|              |                        | 510   | 3.473 | 3.475 | 2.318 | 0.447 | 0.577 | 0.132 |                                           |
|              |                        | 520   | 3.464 | 3.477 | 2.318 | 0.448 | 0.579 | 0.132 |                                           |
|              |                        | 530   | 3.484 | 3.480 | 2.318 | 0.449 | 0.580 | 0.132 |                                           |
|              |                        | 540   | 3.504 | 3.482 | 2.318 | 0.450 | 0.582 | 0.132 |                                           |
|              |                        | 550   | 3.510 | 3.484 | 2.318 | 0.450 | 0.583 | 0.132 |                                           |
|              |                        | 560   | 3.461 | 3.486 | 2.318 | 0.451 | 0.585 | 0.132 |                                           |
|              |                        | 570   | 3.478 | 3.488 | 2.318 | 0.452 | 0.586 | 0.132 |                                           |
|              |                        | 580   | 3.472 | 3.490 | 2.318 | 0.452 | 0.587 | 0.132 |                                           |
|              |                        | 590   | 3.513 | 3.491 | 2.318 | 0.453 | 0.588 | 0.132 |                                           |
|              |                        | 600   | 3.479 | 3.493 | 2.318 | 0.453 | 0.589 | 0.132 |                                           |
| GFET<br>#S49 | $c^{(CEA)} = 50$<br>nM | -50   | 2.310 | 2.314 | -     | -     | -     | -     | $\tilde{c}^{(CEA)} \approx$<br>43.8742 nM |
|              |                        | -40   | 2.331 | 2.314 |       |       |       |       |                                           |
|              |                        | -30   | 2.315 | 2.314 |       |       |       |       |                                           |
|              |                        | -20   | 2.313 | 2.314 |       |       |       |       |                                           |
|              |                        | -10   | 2.293 | 2.314 |       |       |       |       |                                           |
|              | 0                      | 2.299 | 2.314 | 2.314 | 0.000 | 0.000 | 0.000 |       |                                           |
|              | $c^{(AFP)} = 5$<br>nM  | 10    | 2.431 | 2.435 | 2.314 | 0.108 | 0.007 | 0.006 | $\tilde{c}^{(AFP)} \approx$<br>6.7803 nM  |
|              |                        | 20    | 2.536 | 2.539 | 2.314 | 0.199 | 0.015 | 0.012 |                                           |
|              |                        | 30    | 2.613 | 2.630 | 2.314 | 0.278 | 0.022 | 0.017 |                                           |
|              | $c^{(PTH)} = 2$<br>nM  | 40    | 2.706 | 2.708 | 2.314 | 0.344 | 0.029 | 0.022 | $\tilde{c}^{(PTH)} \approx$<br>4.1322 nM  |
|              |                        | 50    | 2.756 | 2.777 | 2.314 | 0.401 | 0.035 | 0.026 |                                           |
|              |                        | 60    | 2.826 | 2.836 | 2.314 | 0.450 | 0.042 | 0.031 |                                           |
|              |                        | 70    | 2.893 | 2.888 | 2.314 | 0.491 | 0.049 | 0.035 |                                           |
|              |                        | 80    | 2.948 | 2.934 | 2.314 | 0.526 | 0.055 | 0.039 |                                           |
| 90           |                        | 2.973 | 2.974 | 2.314 | 0.556 | 0.062 | 0.042 |       |                                           |
| 100          |                        | 2.981 | 3.009 | 2.314 | 0.582 | 0.068 | 0.045 |       |                                           |

|     |       |       |       |       |       |       |
|-----|-------|-------|-------|-------|-------|-------|
| 110 | 3.051 | 3.040 | 2.314 | 0.604 | 0.074 | 0.049 |
| 120 | 3.064 | 3.068 | 2.314 | 0.622 | 0.081 | 0.051 |
| 130 | 3.081 | 3.092 | 2.314 | 0.638 | 0.087 | 0.054 |
| 140 | 3.093 | 3.114 | 2.314 | 0.651 | 0.093 | 0.057 |
| 150 | 3.104 | 3.134 | 2.314 | 0.663 | 0.099 | 0.059 |
| 160 | 3.135 | 3.152 | 2.314 | 0.673 | 0.104 | 0.061 |
| 170 | 3.165 | 3.168 | 2.314 | 0.681 | 0.110 | 0.063 |
| 180 | 3.185 | 3.183 | 2.314 | 0.688 | 0.116 | 0.065 |
| 190 | 3.214 | 3.196 | 2.314 | 0.694 | 0.121 | 0.067 |
| 200 | 3.206 | 3.209 | 2.314 | 0.700 | 0.127 | 0.069 |
| 210 | 3.223 | 3.220 | 2.314 | 0.704 | 0.132 | 0.070 |
| 220 | 3.224 | 3.231 | 2.314 | 0.708 | 0.137 | 0.072 |
| 230 | 3.237 | 3.240 | 2.314 | 0.711 | 0.142 | 0.073 |
| 240 | 3.269 | 3.250 | 2.314 | 0.714 | 0.148 | 0.075 |
| 250 | 3.262 | 3.258 | 2.314 | 0.716 | 0.153 | 0.076 |
| 260 | 3.278 | 3.266 | 2.314 | 0.718 | 0.158 | 0.077 |
| 270 | 3.274 | 3.274 | 2.314 | 0.720 | 0.162 | 0.078 |
| 280 | 3.269 | 3.281 | 2.314 | 0.721 | 0.167 | 0.079 |
| 290 | 3.279 | 3.288 | 2.314 | 0.722 | 0.172 | 0.080 |
| 300 | 3.278 | 3.295 | 2.314 | 0.723 | 0.177 | 0.081 |
| 310 | 3.288 | 3.301 | 2.314 | 0.724 | 0.181 | 0.082 |
| 320 | 3.323 | 3.307 | 2.314 | 0.725 | 0.186 | 0.083 |
| 330 | 3.304 | 3.313 | 2.314 | 0.726 | 0.190 | 0.083 |
| 340 | 3.324 | 3.318 | 2.314 | 0.726 | 0.195 | 0.084 |
| 350 | 3.322 | 3.324 | 2.314 | 0.727 | 0.199 | 0.085 |
| 360 | 3.321 | 3.329 | 2.314 | 0.727 | 0.203 | 0.085 |
| 370 | 3.336 | 3.334 | 2.314 | 0.727 | 0.207 | 0.086 |
| 380 | 3.339 | 3.339 | 2.314 | 0.728 | 0.212 | 0.086 |
| 390 | 3.362 | 3.344 | 2.314 | 0.728 | 0.216 | 0.087 |
| 400 | 3.337 | 3.349 | 2.314 | 0.728 | 0.220 | 0.087 |
| 410 | 3.350 | 3.353 | 2.314 | 0.728 | 0.223 | 0.088 |
| 420 | 3.337 | 3.358 | 2.314 | 0.729 | 0.227 | 0.088 |
| 430 | 3.355 | 3.362 | 2.314 | 0.729 | 0.231 | 0.088 |
| 440 | 3.354 | 3.366 | 2.314 | 0.729 | 0.235 | 0.089 |
| 450 | 3.388 | 3.370 | 2.314 | 0.729 | 0.239 | 0.089 |
| 460 | 3.372 | 3.374 | 2.314 | 0.729 | 0.242 | 0.089 |
| 470 | 3.345 | 3.378 | 2.314 | 0.729 | 0.246 | 0.090 |
| 480 | 3.384 | 3.382 | 2.314 | 0.729 | 0.249 | 0.090 |
| 490 | 3.381 | 3.386 | 2.314 | 0.729 | 0.253 | 0.090 |
| 500 | 3.364 | 3.390 | 2.314 | 0.729 | 0.256 | 0.091 |
| 510 | 3.400 | 3.393 | 2.314 | 0.729 | 0.260 | 0.091 |
| 520 | 3.366 | 3.397 | 2.314 | 0.729 | 0.263 | 0.091 |
| 530 | 3.390 | 3.400 | 2.314 | 0.729 | 0.266 | 0.091 |
| 540 | 3.407 | 3.404 | 2.314 | 0.729 | 0.269 | 0.091 |
| 550 | 3.414 | 3.407 | 2.314 | 0.729 | 0.273 | 0.091 |
| 560 | 3.391 | 3.410 | 2.314 | 0.729 | 0.276 | 0.092 |



|              |                        |       |       |       |       |       |       |                                        |                                         |
|--------------|------------------------|-------|-------|-------|-------|-------|-------|----------------------------------------|-----------------------------------------|
|              |                        | 570   | 3.409 | 3.414 | 2.314 | 0.729 | 0.279 | 0.092                                  |                                         |
|              |                        | 580   | 3.395 | 3.417 | 2.314 | 0.729 | 0.282 | 0.092                                  |                                         |
|              |                        | 590   | 3.414 | 3.420 | 2.314 | 0.729 | 0.285 | 0.092                                  |                                         |
|              |                        | 600   | 3.416 | 3.423 | 2.314 | 0.729 | 0.288 | 0.092                                  |                                         |
| GFET<br>#S50 | $c^{(CEA)} = 50$<br>nM | -50   | 2.306 | 2.305 | -     | -     | -     | -                                      | $\hat{c}^{(CEA)} \approx$<br>44.0642 nM |
|              |                        | -40   | 2.297 | 2.305 |       |       |       |                                        |                                         |
|              |                        | -30   | 2.319 | 2.305 |       |       |       |                                        |                                         |
|              |                        | -20   | 2.300 | 2.305 |       |       |       |                                        |                                         |
|              |                        | -10   | 2.306 | 2.305 |       |       |       |                                        |                                         |
|              |                        | 0     | 2.284 | 2.305 | 2.305 | 0.000 | 0.000 | 0.000                                  |                                         |
|              |                        | 10    | 2.419 | 2.432 | 2.305 | 0.107 | 0.007 | 0.013                                  |                                         |
|              |                        | 20    | 2.551 | 2.542 | 2.305 | 0.199 | 0.014 | 0.024                                  |                                         |
|              |                        | 30    | 2.611 | 2.637 | 2.305 | 0.277 | 0.021 | 0.034                                  |                                         |
|              |                        | 40    | 2.718 | 2.719 | 2.305 | 0.343 | 0.028 | 0.044                                  |                                         |
|              |                        | 50    | 2.788 | 2.790 | 2.305 | 0.400 | 0.034 | 0.052                                  |                                         |
|              |                        | 60    | 2.842 | 2.852 | 2.305 | 0.448 | 0.041 | 0.059                                  |                                         |
|              |                        | 70    | 2.901 | 2.906 | 2.305 | 0.489 | 0.047 | 0.066                                  |                                         |
|              |                        | 80    | 2.929 | 2.953 | 2.305 | 0.524 | 0.054 | 0.071                                  |                                         |
|              |                        | 90    | 3.014 | 2.995 | 2.305 | 0.553 | 0.060 | 0.077                                  |                                         |
|              |                        | 100   | 3.040 | 3.031 | 2.305 | 0.579 | 0.066 | 0.081                                  |                                         |
|              |                        | 110   | 3.079 | 3.063 | 2.305 | 0.600 | 0.072 | 0.086                                  |                                         |
|              |                        | 120   | 3.075 | 3.091 | 2.305 | 0.619 | 0.078 | 0.089                                  |                                         |
|              |                        | 130   | 3.116 | 3.116 | 2.305 | 0.634 | 0.084 | 0.093                                  |                                         |
|              |                        | 140   | 3.122 | 3.138 | 2.305 | 0.648 | 0.090 | 0.096                                  |                                         |
|              |                        | 150   | 3.145 | 3.158 | 2.305 | 0.659 | 0.096 | 0.098                                  |                                         |
|              |                        | 160   | 3.172 | 3.175 | 2.305 | 0.669 | 0.101 | 0.101                                  |                                         |
|              |                        | 170   | 3.199 | 3.191 | 2.305 | 0.677 | 0.107 | 0.103                                  |                                         |
|              |                        | 180   | 3.164 | 3.206 | 2.305 | 0.684 | 0.112 | 0.105                                  |                                         |
|              |                        | 190   | 3.204 | 3.219 | 2.305 | 0.690 | 0.118 | 0.106                                  |                                         |
|              |                        | 200   | 3.226 | 3.231 | 2.305 | 0.695 | 0.123 | 0.108                                  |                                         |
|              |                        | 210   | 3.243 | 3.242 | 2.305 | 0.699 | 0.128 | 0.109                                  |                                         |
|              |                        | 220   | 3.238 | 3.252 | 2.305 | 0.703 | 0.133 | 0.111                                  |                                         |
|              |                        | 230   | 3.226 | 3.261 | 2.305 | 0.706 | 0.139 | 0.112                                  |                                         |
|              |                        | 240   | 3.266 | 3.270 | 2.305 | 0.709 | 0.143 | 0.113                                  |                                         |
|              |                        | 250   | 3.256 | 3.278 | 2.305 | 0.711 | 0.148 | 0.113                                  |                                         |
|              |                        | 260   | 3.277 | 3.285 | 2.305 | 0.713 | 0.153 | 0.114                                  |                                         |
|              |                        | 270   | 3.276 | 3.292 | 2.305 | 0.715 | 0.158 | 0.115                                  |                                         |
|              |                        | 280   | 3.308 | 3.299 | 2.305 | 0.716 | 0.163 | 0.116                                  |                                         |
|              |                        | 290   | 3.306 | 3.305 | 2.305 | 0.717 | 0.167 | 0.116                                  |                                         |
|              |                        | 300   | 3.291 | 3.311 | 2.305 | 0.718 | 0.172 | 0.117                                  |                                         |
| 310          | 3.279                  | 3.317 | 2.305 | 0.719 | 0.176 | 0.117 |       |                                        |                                         |
| 320          | 3.299                  | 3.323 | 2.305 | 0.720 | 0.181 | 0.117 |       |                                        |                                         |
| 330          | 3.284                  | 3.328 | 2.305 | 0.721 | 0.185 | 0.118 |       |                                        |                                         |
| 340          | 3.316                  | 3.333 | 2.305 | 0.721 | 0.189 | 0.118 |       |                                        |                                         |
| 350          | 3.316                  | 3.338 | 2.305 | 0.722 | 0.194 | 0.118 |       |                                        |                                         |
| 360          | 3.353                  | 3.343 | 2.305 | 0.722 | 0.198 | 0.119 |       |                                        |                                         |
|              | $c^{(AFP)} = 5$<br>nM  |       |       |       |       |       |       | $\hat{c}^{(AFP)} \approx$<br>6.6542 nM |                                         |
|              | $c^{(PTH)} = 5$<br>nM  |       |       |       |       |       |       | $\hat{c}^{(PTH)} \approx$<br>8.6322 nM |                                         |

|              |                        |       |       |       |       |       |       |                                           |                                           |
|--------------|------------------------|-------|-------|-------|-------|-------|-------|-------------------------------------------|-------------------------------------------|
|              |                        | 370   | 3.333 | 3.348 | 2.305 | 0.722 | 0.202 | 0.119                                     |                                           |
|              |                        | 380   | 3.332 | 3.352 | 2.305 | 0.723 | 0.206 | 0.119                                     |                                           |
|              |                        | 390   | 3.346 | 3.357 | 2.305 | 0.723 | 0.210 | 0.119                                     |                                           |
|              |                        | 400   | 3.347 | 3.361 | 2.305 | 0.723 | 0.214 | 0.119                                     |                                           |
|              |                        | 410   | 3.342 | 3.365 | 2.305 | 0.723 | 0.217 | 0.120                                     |                                           |
|              |                        | 420   | 3.365 | 3.369 | 2.305 | 0.723 | 0.221 | 0.120                                     |                                           |
|              |                        | 430   | 3.376 | 3.373 | 2.305 | 0.724 | 0.225 | 0.120                                     |                                           |
|              |                        | 440   | 3.356 | 3.377 | 2.305 | 0.724 | 0.229 | 0.120                                     |                                           |
|              |                        | 450   | 3.348 | 3.381 | 2.305 | 0.724 | 0.232 | 0.120                                     |                                           |
|              |                        | 460   | 3.364 | 3.384 | 2.305 | 0.724 | 0.236 | 0.120                                     |                                           |
|              |                        | 470   | 3.372 | 3.388 | 2.305 | 0.724 | 0.239 | 0.120                                     |                                           |
|              |                        | 480   | 3.384 | 3.392 | 2.305 | 0.724 | 0.243 | 0.120                                     |                                           |
|              |                        | 490   | 3.391 | 3.395 | 2.305 | 0.724 | 0.246 | 0.120                                     |                                           |
|              |                        | 500   | 3.423 | 3.399 | 2.305 | 0.724 | 0.249 | 0.120                                     |                                           |
|              |                        | 510   | 3.396 | 3.402 | 2.305 | 0.724 | 0.253 | 0.120                                     |                                           |
|              |                        | 520   | 3.385 | 3.405 | 2.305 | 0.724 | 0.256 | 0.120                                     |                                           |
|              |                        | 530   | 3.394 | 3.408 | 2.305 | 0.724 | 0.259 | 0.121                                     |                                           |
|              |                        | 540   | 3.426 | 3.412 | 2.305 | 0.724 | 0.262 | 0.121                                     |                                           |
|              |                        | 550   | 3.401 | 3.415 | 2.305 | 0.724 | 0.265 | 0.121                                     |                                           |
|              |                        | 560   | 3.414 | 3.418 | 2.305 | 0.724 | 0.268 | 0.121                                     |                                           |
|              |                        | 570   | 3.410 | 3.421 | 2.305 | 0.724 | 0.271 | 0.121                                     |                                           |
|              |                        | 580   | 3.409 | 3.424 | 2.305 | 0.724 | 0.274 | 0.121                                     |                                           |
|              |                        | 590   | 3.426 | 3.427 | 2.305 | 0.724 | 0.277 | 0.121                                     |                                           |
|              |                        | 600   | 3.394 | 3.430 | 2.305 | 0.724 | 0.280 | 0.121                                     |                                           |
| GFET<br>#S51 | $c^{(CEA)} = 50$<br>nM | -50   | 2.268 | 2.283 | -     | -     | -     | -                                         | $\tilde{c}^{(CEA)} \approx$<br>46.1987 nM |
|              |                        | -40   | 2.262 | 2.283 |       |       |       |                                           |                                           |
|              |                        | -30   | 2.256 | 2.283 |       |       |       |                                           |                                           |
|              |                        | -20   | 2.290 | 2.283 |       |       |       |                                           |                                           |
|              |                        | -10   | 2.264 | 2.283 |       |       |       |                                           |                                           |
|              | 0                      | 2.280 | 2.283 | 2.283 | 0.000 | 0.000 | 0.000 |                                           |                                           |
|              | 10                     | 2.461 | 2.452 | 2.283 | 0.116 | 0.006 | 0.047 |                                           |                                           |
|              | 20                     | 2.576 | 2.587 | 2.283 | 0.214 | 0.012 | 0.078 |                                           |                                           |
|              | 30                     | 2.677 | 2.697 | 2.283 | 0.297 | 0.018 | 0.099 |                                           |                                           |
|              | 40                     | 2.765 | 2.787 | 2.283 | 0.367 | 0.024 | 0.113 |                                           |                                           |
|              | 50                     | 2.847 | 2.861 | 2.283 | 0.426 | 0.029 | 0.123 |                                           |                                           |
|              | 60                     | 2.912 | 2.923 | 2.283 | 0.476 | 0.035 | 0.129 |                                           |                                           |
|              | 70                     | 2.972 | 2.975 | 2.283 | 0.519 | 0.041 | 0.133 |                                           |                                           |
|              | 80                     | 3.011 | 3.019 | 2.283 | 0.554 | 0.046 | 0.136 |                                           |                                           |
|              | 90                     | 3.068 | 3.056 | 2.283 | 0.585 | 0.051 | 0.138 |                                           |                                           |
|              | 100                    | 3.097 | 3.089 | 2.283 | 0.610 | 0.057 | 0.139 |                                           |                                           |
|              | 110                    | 3.085 | 3.116 | 2.283 | 0.632 | 0.062 | 0.140 |                                           |                                           |
|              | 120                    | 3.129 | 3.140 | 2.283 | 0.650 | 0.067 | 0.140 |                                           |                                           |
|              | 130                    | 3.145 | 3.161 | 2.283 | 0.665 | 0.072 | 0.141 |                                           |                                           |
|              | 140                    | 3.164 | 3.179 | 2.283 | 0.678 | 0.077 | 0.141 |                                           |                                           |
| 150          | 3.160                  | 3.196 | 2.283 | 0.690 | 0.082 | 0.141 |       |                                           |                                           |
| 160          | 3.179                  | 3.210 | 2.283 | 0.699 | 0.087 | 0.141 |       |                                           |                                           |
|              | $c^{(AFP)} = 5$<br>nM  |       |       |       |       |       |       | $\tilde{c}^{(AFP)} \approx$<br>5.9824 nM  |                                           |
|              | $c^{(PTH)} = 20$<br>nM |       |       |       |       |       |       | $\tilde{c}^{(PTH)} \approx$<br>37.0592 nM |                                           |

|              |                        |     |       |       |       |       |       |       |                                           |
|--------------|------------------------|-----|-------|-------|-------|-------|-------|-------|-------------------------------------------|
|              |                        | 170 | 3.214 | 3.223 | 2.283 | 0.707 | 0.092 | 0.141 |                                           |
|              |                        | 180 | 3.230 | 3.234 | 2.283 | 0.713 | 0.097 | 0.141 |                                           |
|              |                        | 190 | 3.221 | 3.244 | 2.283 | 0.719 | 0.101 | 0.141 |                                           |
|              |                        | 200 | 3.242 | 3.254 | 2.283 | 0.724 | 0.106 | 0.141 |                                           |
|              |                        | 210 | 3.254 | 3.262 | 2.283 | 0.728 | 0.110 | 0.141 |                                           |
|              |                        | 220 | 3.245 | 3.270 | 2.283 | 0.731 | 0.115 | 0.141 |                                           |
|              |                        | 230 | 3.276 | 3.277 | 2.283 | 0.734 | 0.119 | 0.141 |                                           |
|              |                        | 240 | 3.275 | 3.284 | 2.283 | 0.737 | 0.123 | 0.141 |                                           |
|              |                        | 250 | 3.294 | 3.291 | 2.283 | 0.739 | 0.128 | 0.141 |                                           |
|              |                        | 260 | 3.276 | 3.296 | 2.283 | 0.740 | 0.132 | 0.141 |                                           |
|              |                        | 270 | 3.290 | 3.302 | 2.283 | 0.742 | 0.136 | 0.141 |                                           |
|              |                        | 280 | 3.289 | 3.307 | 2.283 | 0.743 | 0.140 | 0.141 |                                           |
|              |                        | 290 | 3.317 | 3.312 | 2.283 | 0.744 | 0.144 | 0.141 |                                           |
|              |                        | 300 | 3.324 | 3.317 | 2.283 | 0.745 | 0.148 | 0.141 |                                           |
|              |                        | 310 | 3.311 | 3.322 | 2.283 | 0.746 | 0.152 | 0.141 |                                           |
|              |                        | 320 | 3.310 | 3.326 | 2.283 | 0.746 | 0.156 | 0.141 |                                           |
|              |                        | 330 | 3.315 | 3.331 | 2.283 | 0.747 | 0.160 | 0.141 |                                           |
|              |                        | 340 | 3.324 | 3.335 | 2.283 | 0.747 | 0.163 | 0.141 |                                           |
|              |                        | 350 | 3.349 | 3.339 | 2.283 | 0.748 | 0.167 | 0.141 |                                           |
|              |                        | 360 | 3.352 | 3.343 | 2.283 | 0.748 | 0.171 | 0.141 |                                           |
|              |                        | 370 | 3.309 | 3.347 | 2.283 | 0.748 | 0.174 | 0.141 |                                           |
|              |                        | 380 | 3.340 | 3.351 | 2.283 | 0.749 | 0.178 | 0.141 |                                           |
|              |                        | 390 | 3.345 | 3.354 | 2.283 | 0.749 | 0.181 | 0.141 |                                           |
|              |                        | 400 | 3.349 | 3.358 | 2.283 | 0.749 | 0.185 | 0.141 |                                           |
|              |                        | 410 | 3.354 | 3.361 | 2.283 | 0.749 | 0.188 | 0.141 |                                           |
|              |                        | 420 | 3.362 | 3.365 | 2.283 | 0.749 | 0.191 | 0.141 |                                           |
|              |                        | 430 | 3.353 | 3.368 | 2.283 | 0.749 | 0.195 | 0.141 |                                           |
|              |                        | 440 | 3.354 | 3.371 | 2.283 | 0.749 | 0.198 | 0.141 |                                           |
|              |                        | 450 | 3.350 | 3.375 | 2.283 | 0.749 | 0.201 | 0.141 |                                           |
|              |                        | 460 | 3.371 | 3.378 | 2.283 | 0.750 | 0.204 | 0.141 |                                           |
|              |                        | 470 | 3.371 | 3.381 | 2.283 | 0.750 | 0.207 | 0.141 |                                           |
|              |                        | 480 | 3.393 | 3.384 | 2.283 | 0.750 | 0.210 | 0.141 |                                           |
|              |                        | 490 | 3.359 | 3.387 | 2.283 | 0.750 | 0.213 | 0.141 |                                           |
|              |                        | 500 | 3.407 | 3.390 | 2.283 | 0.750 | 0.216 | 0.141 |                                           |
|              |                        | 510 | 3.407 | 3.393 | 2.283 | 0.750 | 0.219 | 0.141 |                                           |
|              |                        | 520 | 3.393 | 3.396 | 2.283 | 0.750 | 0.222 | 0.141 |                                           |
|              |                        | 530 | 3.424 | 3.399 | 2.283 | 0.750 | 0.225 | 0.141 |                                           |
|              |                        | 540 | 3.399 | 3.402 | 2.283 | 0.750 | 0.228 | 0.141 |                                           |
|              |                        | 550 | 3.380 | 3.404 | 2.283 | 0.750 | 0.230 | 0.141 |                                           |
|              |                        | 560 | 3.418 | 3.407 | 2.283 | 0.750 | 0.233 | 0.141 |                                           |
|              |                        | 570 | 3.396 | 3.410 | 2.283 | 0.750 | 0.236 | 0.141 |                                           |
|              |                        | 580 | 3.376 | 3.412 | 2.283 | 0.750 | 0.238 | 0.141 |                                           |
|              |                        | 590 | 3.407 | 3.415 | 2.283 | 0.750 | 0.241 | 0.141 |                                           |
|              |                        | 600 | 3.400 | 3.417 | 2.283 | 0.750 | 0.243 | 0.141 |                                           |
| GFET<br>#S52 | $c^{(CEA)} = 50$<br>nM | -50 | 2.286 | 2.283 |       |       |       |       | $\tilde{c}^{(CEA)} \approx$<br>39.5428 nM |
|              |                        | -40 | 2.296 | 2.283 | -     | -     | -     | -     |                                           |

|                        |       |       |       |       |       |       |       |                                           |
|------------------------|-------|-------|-------|-------|-------|-------|-------|-------------------------------------------|
| $c^{(AFP)} = 5$<br>nM  | -30   | 2.260 | 2.283 |       |       |       |       | $\tilde{c}^{(AFP)} \approx$<br>7.4308 nM  |
|                        | -20   | 2.291 | 2.283 |       |       |       |       |                                           |
|                        | -10   | 2.274 | 2.283 |       |       |       |       |                                           |
| $c^{(PTH)} = 50$<br>nM | 0     | 2.283 | 2.283 | 2.283 | 0.000 | 0.000 | 0.000 | $\tilde{c}^{(PTH)} \approx$<br>93.1006 nM |
|                        | 10    | 2.455 | 2.470 | 2.283 | 0.093 | 0.007 | 0.087 |                                           |
|                        | 20    | 2.603 | 2.591 | 2.283 | 0.173 | 0.014 | 0.120 |                                           |
|                        | 30    | 2.661 | 2.680 | 2.283 | 0.242 | 0.022 | 0.133 |                                           |
|                        | 40    | 2.737 | 2.751 | 2.283 | 0.303 | 0.028 | 0.137 |                                           |
|                        | 50    | 2.798 | 2.812 | 2.283 | 0.355 | 0.035 | 0.139 |                                           |
|                        | 60    | 2.864 | 2.865 | 2.283 | 0.400 | 0.042 | 0.140 |                                           |
|                        | 70    | 2.913 | 2.911 | 2.283 | 0.439 | 0.049 | 0.140 |                                           |
|                        | 80    | 2.946 | 2.951 | 2.283 | 0.473 | 0.055 | 0.140 |                                           |
|                        | 90    | 2.974 | 2.987 | 2.283 | 0.502 | 0.062 | 0.140 |                                           |
|                        | 100   | 3.023 | 3.018 | 2.283 | 0.527 | 0.068 | 0.140 |                                           |
|                        | 110   | 3.036 | 3.046 | 2.283 | 0.549 | 0.074 | 0.140 |                                           |
|                        | 120   | 3.080 | 3.071 | 2.283 | 0.568 | 0.080 | 0.140 |                                           |
|                        | 130   | 3.087 | 3.094 | 2.283 | 0.584 | 0.086 | 0.140 |                                           |
|                        | 140   | 3.087 | 3.114 | 2.283 | 0.599 | 0.092 | 0.140 |                                           |
|                        | 150   | 3.119 | 3.132 | 2.283 | 0.611 | 0.098 | 0.140 |                                           |
|                        | 160   | 3.141 | 3.148 | 2.283 | 0.622 | 0.104 | 0.140 |                                           |
|                        | 170   | 3.153 | 3.163 | 2.283 | 0.631 | 0.109 | 0.140 |                                           |
|                        | 180   | 3.176 | 3.177 | 2.283 | 0.639 | 0.115 | 0.140 |                                           |
|                        | 190   | 3.180 | 3.189 | 2.283 | 0.646 | 0.120 | 0.140 |                                           |
|                        | 200   | 3.185 | 3.200 | 2.283 | 0.652 | 0.125 | 0.140 |                                           |
|                        | 210   | 3.175 | 3.211 | 2.283 | 0.657 | 0.131 | 0.140 |                                           |
|                        | 220   | 3.227 | 3.221 | 2.283 | 0.661 | 0.136 | 0.140 |                                           |
|                        | 230   | 3.218 | 3.230 | 2.283 | 0.665 | 0.141 | 0.140 |                                           |
|                        | 240   | 3.224 | 3.238 | 2.283 | 0.669 | 0.146 | 0.140 |                                           |
|                        | 250   | 3.247 | 3.246 | 2.283 | 0.671 | 0.151 | 0.140 |                                           |
|                        | 260   | 3.252 | 3.253 | 2.283 | 0.674 | 0.156 | 0.140 |                                           |
|                        | 270   | 3.240 | 3.260 | 2.283 | 0.676 | 0.161 | 0.140 |                                           |
|                        | 280   | 3.273 | 3.267 | 2.283 | 0.678 | 0.165 | 0.140 |                                           |
|                        | 290   | 3.248 | 3.273 | 2.283 | 0.680 | 0.170 | 0.140 |                                           |
|                        | 300   | 3.266 | 3.279 | 2.283 | 0.681 | 0.175 | 0.140 |                                           |
|                        | 310   | 3.258 | 3.285 | 2.283 | 0.682 | 0.179 | 0.140 |                                           |
|                        | 320   | 3.262 | 3.290 | 2.283 | 0.683 | 0.183 | 0.140 |                                           |
|                        | 330   | 3.315 | 3.295 | 2.283 | 0.684 | 0.188 | 0.140 |                                           |
|                        | 340   | 3.311 | 3.301 | 2.283 | 0.685 | 0.192 | 0.140 |                                           |
|                        | 350   | 3.283 | 3.305 | 2.283 | 0.686 | 0.196 | 0.140 |                                           |
|                        | 360   | 3.308 | 3.310 | 2.283 | 0.686 | 0.200 | 0.140 |                                           |
|                        | 370   | 3.323 | 3.315 | 2.283 | 0.687 | 0.205 | 0.140 |                                           |
|                        | 380   | 3.308 | 3.319 | 2.283 | 0.687 | 0.209 | 0.140 |                                           |
|                        | 390   | 3.313 | 3.324 | 2.283 | 0.688 | 0.212 | 0.140 |                                           |
|                        | 400   | 3.325 | 3.328 | 2.283 | 0.688 | 0.216 | 0.140 |                                           |
|                        | 410   | 3.336 | 3.332 | 2.283 | 0.688 | 0.220 | 0.140 |                                           |
| 420                    | 3.337 | 3.336 | 2.283 | 0.689 | 0.224 | 0.140 |       |                                           |

|              |                        |       |       |       |       |       |       |                                           |                                           |
|--------------|------------------------|-------|-------|-------|-------|-------|-------|-------------------------------------------|-------------------------------------------|
|              |                        | 430   | 3.335 | 3.340 | 2.283 | 0.689 | 0.228 | 0.140                                     |                                           |
|              |                        | 440   | 3.360 | 3.344 | 2.283 | 0.689 | 0.231 | 0.140                                     |                                           |
|              |                        | 450   | 3.362 | 3.347 | 2.283 | 0.689 | 0.235 | 0.140                                     |                                           |
|              |                        | 460   | 3.351 | 3.351 | 2.283 | 0.689 | 0.238 | 0.140                                     |                                           |
|              |                        | 470   | 3.362 | 3.355 | 2.283 | 0.689 | 0.242 | 0.140                                     |                                           |
|              |                        | 480   | 3.343 | 3.358 | 2.283 | 0.690 | 0.245 | 0.140                                     |                                           |
|              |                        | 490   | 3.330 | 3.362 | 2.283 | 0.690 | 0.249 | 0.140                                     |                                           |
|              |                        | 500   | 3.347 | 3.365 | 2.283 | 0.690 | 0.252 | 0.140                                     |                                           |
|              |                        | 510   | 3.338 | 3.368 | 2.283 | 0.690 | 0.255 | 0.140                                     |                                           |
|              |                        | 520   | 3.350 | 3.372 | 2.283 | 0.690 | 0.258 | 0.140                                     |                                           |
|              |                        | 530   | 3.388 | 3.375 | 2.283 | 0.690 | 0.262 | 0.140                                     |                                           |
|              |                        | 540   | 3.369 | 3.378 | 2.283 | 0.690 | 0.265 | 0.140                                     |                                           |
|              |                        | 550   | 3.345 | 3.381 | 2.283 | 0.690 | 0.268 | 0.140                                     |                                           |
|              |                        | 560   | 3.388 | 3.384 | 2.283 | 0.690 | 0.271 | 0.140                                     |                                           |
|              |                        | 570   | 3.401 | 3.387 | 2.283 | 0.690 | 0.274 | 0.140                                     |                                           |
|              |                        | 580   | 3.376 | 3.390 | 2.283 | 0.690 | 0.277 | 0.140                                     |                                           |
|              |                        | 590   | 3.375 | 3.393 | 2.283 | 0.690 | 0.279 | 0.140                                     |                                           |
|              |                        | 600   | 3.409 | 3.396 | 2.283 | 0.690 | 0.282 | 0.140                                     |                                           |
| GFET<br>#S53 | $c^{(CEA)} = 50$<br>nM | -50   | 2.314 | 2.323 | -     | -     | -     | -                                         | $\tilde{c}^{(CEA)} \approx$<br>51.7702 nM |
|              |                        | -40   | 2.301 | 2.323 |       |       |       |                                           |                                           |
|              |                        | -30   | 2.302 | 2.323 |       |       |       |                                           |                                           |
|              |                        | -20   | 2.318 | 2.323 |       |       |       |                                           |                                           |
|              |                        | -10   | 2.322 | 2.323 |       |       |       |                                           |                                           |
|              | 0                      | 2.332 | 2.323 | 2.323 | 0.000 | 0.000 | 0.000 |                                           |                                           |
|              | 10                     | 2.429 | 2.455 | 2.323 | 0.119 | 0.009 | 0.005 |                                           |                                           |
|              | 20                     | 2.544 | 2.567 | 2.323 | 0.218 | 0.018 | 0.009 |                                           |                                           |
|              | 30                     | 2.650 | 2.661 | 2.323 | 0.299 | 0.026 | 0.013 |                                           |                                           |
|              | 40                     | 2.721 | 2.741 | 2.323 | 0.367 | 0.035 | 0.017 |                                           |                                           |
|              | 50                     | 2.778 | 2.809 | 2.323 | 0.423 | 0.043 | 0.021 |                                           |                                           |
|              | 60                     | 2.850 | 2.867 | 2.323 | 0.470 | 0.051 | 0.024 |                                           |                                           |
|              | 70                     | 2.888 | 2.917 | 2.323 | 0.508 | 0.059 | 0.027 |                                           |                                           |
|              | 80                     | 2.963 | 2.960 | 2.323 | 0.540 | 0.067 | 0.030 |                                           |                                           |
|              | 90                     | 3.016 | 2.997 | 2.323 | 0.567 | 0.074 | 0.033 |                                           |                                           |
|              | 100                    | 3.048 | 3.029 | 2.323 | 0.589 | 0.082 | 0.036 |                                           |                                           |
|              | 110                    | 3.037 | 3.057 | 2.323 | 0.607 | 0.089 | 0.039 |                                           |                                           |
|              | 120                    | 3.073 | 3.081 | 2.323 | 0.622 | 0.096 | 0.041 |                                           |                                           |
|              | 130                    | 3.082 | 3.103 | 2.323 | 0.634 | 0.103 | 0.043 |                                           |                                           |
|              | 140                    | 3.132 | 3.123 | 2.323 | 0.645 | 0.110 | 0.046 |                                           |                                           |
|              | 150                    | 3.129 | 3.140 | 2.323 | 0.653 | 0.116 | 0.048 |                                           |                                           |
|              | 160                    | 3.161 | 3.156 | 2.323 | 0.660 | 0.123 | 0.050 |                                           |                                           |
|              | 170                    | 3.159 | 3.170 | 2.323 | 0.666 | 0.129 | 0.051 |                                           |                                           |
| 180          | 3.172                  | 3.183 | 2.323 | 0.671 | 0.136 | 0.053 |       |                                           |                                           |
| 190          | 3.163                  | 3.194 | 2.323 | 0.675 | 0.142 | 0.055 |       |                                           |                                           |
| 200          | 3.214                  | 3.205 | 2.323 | 0.678 | 0.148 | 0.056 |       |                                           |                                           |
| 210          | 3.196                  | 3.216 | 2.323 | 0.681 | 0.154 | 0.058 |       |                                           |                                           |
| 220          | 3.204                  | 3.225 | 2.323 | 0.684 | 0.160 | 0.059 |       |                                           |                                           |
|              | $c^{(AFP)} = 20$<br>nM |       |       |       |       |       |       | $\tilde{c}^{(AFP)} \approx$<br>11.8803 nM |                                           |
|              | $c^{(PTH)} = 2$<br>nM  |       |       |       |       |       |       | $\tilde{c}^{(PTH)} \approx$<br>3.2231 nM  |                                           |

|              |                        |       |       |       |       |       |       |       |                                           |
|--------------|------------------------|-------|-------|-------|-------|-------|-------|-------|-------------------------------------------|
|              |                        | 230   | 3.205 | 3.234 | 2.323 | 0.685 | 0.165 | 0.061 |                                           |
|              |                        | 240   | 3.239 | 3.242 | 2.323 | 0.687 | 0.171 | 0.062 |                                           |
|              |                        | 250   | 3.250 | 3.250 | 2.323 | 0.688 | 0.176 | 0.063 |                                           |
|              |                        | 260   | 3.265 | 3.258 | 2.323 | 0.689 | 0.182 | 0.064 |                                           |
|              |                        | 270   | 3.251 | 3.265 | 2.323 | 0.690 | 0.187 | 0.065 |                                           |
|              |                        | 280   | 3.256 | 3.272 | 2.323 | 0.691 | 0.192 | 0.066 |                                           |
|              |                        | 290   | 3.285 | 3.278 | 2.323 | 0.692 | 0.197 | 0.067 |                                           |
|              |                        | 300   | 3.269 | 3.285 | 2.323 | 0.692 | 0.202 | 0.068 |                                           |
|              |                        | 310   | 3.264 | 3.291 | 2.323 | 0.693 | 0.207 | 0.069 |                                           |
|              |                        | 320   | 3.286 | 3.297 | 2.323 | 0.693 | 0.212 | 0.070 |                                           |
|              |                        | 330   | 3.291 | 3.302 | 2.323 | 0.693 | 0.216 | 0.070 |                                           |
|              |                        | 340   | 3.274 | 3.308 | 2.323 | 0.693 | 0.221 | 0.071 |                                           |
|              |                        | 350   | 3.302 | 3.313 | 2.323 | 0.694 | 0.225 | 0.072 |                                           |
|              |                        | 360   | 3.299 | 3.318 | 2.323 | 0.694 | 0.229 | 0.072 |                                           |
|              |                        | 370   | 3.313 | 3.323 | 2.323 | 0.694 | 0.234 | 0.073 |                                           |
|              |                        | 380   | 3.287 | 3.328 | 2.323 | 0.694 | 0.238 | 0.073 |                                           |
|              |                        | 390   | 3.354 | 3.333 | 2.323 | 0.694 | 0.242 | 0.074 |                                           |
|              |                        | 400   | 3.365 | 3.337 | 2.323 | 0.694 | 0.246 | 0.074 |                                           |
|              |                        | 410   | 3.351 | 3.342 | 2.323 | 0.694 | 0.250 | 0.075 |                                           |
|              |                        | 420   | 3.351 | 3.346 | 2.323 | 0.694 | 0.254 | 0.075 |                                           |
|              |                        | 430   | 3.346 | 3.350 | 2.323 | 0.694 | 0.258 | 0.076 |                                           |
|              |                        | 440   | 3.349 | 3.355 | 2.323 | 0.694 | 0.261 | 0.076 |                                           |
|              |                        | 450   | 3.363 | 3.359 | 2.323 | 0.695 | 0.265 | 0.077 |                                           |
|              |                        | 460   | 3.343 | 3.363 | 2.323 | 0.695 | 0.268 | 0.077 |                                           |
|              |                        | 470   | 3.396 | 3.366 | 2.323 | 0.695 | 0.272 | 0.077 |                                           |
|              |                        | 480   | 3.356 | 3.370 | 2.323 | 0.695 | 0.275 | 0.078 |                                           |
|              |                        | 490   | 3.394 | 3.374 | 2.323 | 0.695 | 0.279 | 0.078 |                                           |
|              |                        | 500   | 3.345 | 3.377 | 2.323 | 0.695 | 0.282 | 0.078 |                                           |
|              |                        | 510   | 3.368 | 3.381 | 2.323 | 0.695 | 0.285 | 0.078 |                                           |
|              |                        | 520   | 3.381 | 3.384 | 2.323 | 0.695 | 0.288 | 0.079 |                                           |
|              |                        | 530   | 3.368 | 3.387 | 2.323 | 0.695 | 0.291 | 0.079 |                                           |
|              |                        | 540   | 3.390 | 3.391 | 2.323 | 0.695 | 0.294 | 0.079 |                                           |
|              |                        | 550   | 3.381 | 3.394 | 2.323 | 0.695 | 0.297 | 0.079 |                                           |
|              |                        | 560   | 3.400 | 3.397 | 2.323 | 0.695 | 0.300 | 0.080 |                                           |
|              |                        | 570   | 3.391 | 3.400 | 2.323 | 0.695 | 0.303 | 0.080 |                                           |
|              |                        | 580   | 3.387 | 3.403 | 2.323 | 0.695 | 0.306 | 0.080 |                                           |
|              |                        | 590   | 3.409 | 3.406 | 2.323 | 0.695 | 0.308 | 0.080 |                                           |
|              |                        | 600   | 3.392 | 3.409 | 2.323 | 0.695 | 0.311 | 0.080 |                                           |
| GFET<br>#S54 | $c^{(CEA)} = 50$<br>nM | -50   | 2.320 | 2.312 | -     | -     | -     | -     | $\tilde{c}^{(CEA)} \approx$<br>43.1765 nM |
|              |                        | -40   | 2.306 | 2.312 |       |       |       |       |                                           |
|              |                        | -30   | 2.295 | 2.312 |       |       |       |       |                                           |
|              | $c^{(AFP)} = 20$<br>nM | -20   | 2.299 | 2.312 | -     | -     | -     | -     | $\tilde{c}^{(AFP)} \approx$<br>15.3323 nM |
|              |                        | -10   | 2.314 | 2.312 |       |       |       |       |                                           |
|              | $c^{(PTH)} = 5$<br>nM  | 0     | 2.318 | 2.312 | 2.312 | 0.000 | 0.000 | 0.000 | $\tilde{c}^{(PTH)} \approx$<br>6.5530 nM  |
|              |                        | 10    | 2.428 | 2.425 | 2.312 | 0.093 | 0.011 | 0.009 |                                           |
| 20           |                        | 2.509 | 2.524 | 2.312 | 0.173 | 0.021 | 0.017 |       |                                           |

|     |       |       |       |       |       |       |
|-----|-------|-------|-------|-------|-------|-------|
| 30  | 2.588 | 2.610 | 2.312 | 0.241 | 0.031 | 0.025 |
| 40  | 2.665 | 2.685 | 2.312 | 0.300 | 0.042 | 0.032 |
| 50  | 2.737 | 2.751 | 2.312 | 0.349 | 0.051 | 0.038 |
| 60  | 2.805 | 2.809 | 2.312 | 0.392 | 0.061 | 0.044 |
| 70  | 2.837 | 2.860 | 2.312 | 0.428 | 0.070 | 0.049 |
| 80  | 2.896 | 2.904 | 2.312 | 0.459 | 0.079 | 0.054 |
| 90  | 2.944 | 2.944 | 2.312 | 0.486 | 0.088 | 0.058 |
| 100 | 2.970 | 2.980 | 2.312 | 0.509 | 0.097 | 0.062 |
| 110 | 3.002 | 3.011 | 2.312 | 0.528 | 0.105 | 0.066 |
| 120 | 3.022 | 3.039 | 2.312 | 0.545 | 0.113 | 0.069 |
| 130 | 3.053 | 3.064 | 2.312 | 0.559 | 0.122 | 0.072 |
| 140 | 3.063 | 3.087 | 2.312 | 0.571 | 0.129 | 0.075 |
| 150 | 3.079 | 3.108 | 2.312 | 0.581 | 0.137 | 0.077 |
| 160 | 3.095 | 3.126 | 2.312 | 0.590 | 0.145 | 0.080 |
| 170 | 3.116 | 3.143 | 2.312 | 0.598 | 0.152 | 0.082 |
| 180 | 3.158 | 3.159 | 2.312 | 0.604 | 0.159 | 0.084 |
| 190 | 3.174 | 3.173 | 2.312 | 0.610 | 0.166 | 0.085 |
| 200 | 3.176 | 3.186 | 2.312 | 0.614 | 0.173 | 0.087 |
| 210 | 3.219 | 3.198 | 2.312 | 0.618 | 0.180 | 0.088 |
| 220 | 3.222 | 3.210 | 2.312 | 0.622 | 0.186 | 0.090 |
| 230 | 3.215 | 3.220 | 2.312 | 0.625 | 0.192 | 0.091 |
| 240 | 3.225 | 3.230 | 2.312 | 0.627 | 0.199 | 0.092 |
| 250 | 3.228 | 3.239 | 2.312 | 0.629 | 0.205 | 0.093 |
| 260 | 3.238 | 3.248 | 2.312 | 0.631 | 0.210 | 0.094 |
| 270 | 3.247 | 3.256 | 2.312 | 0.633 | 0.216 | 0.095 |
| 280 | 3.247 | 3.264 | 2.312 | 0.634 | 0.222 | 0.096 |
| 290 | 3.258 | 3.271 | 2.312 | 0.635 | 0.227 | 0.096 |
| 300 | 3.274 | 3.278 | 2.312 | 0.636 | 0.233 | 0.097 |
| 310 | 3.259 | 3.285 | 2.312 | 0.637 | 0.238 | 0.098 |
| 320 | 3.293 | 3.291 | 2.312 | 0.638 | 0.243 | 0.098 |
| 330 | 3.301 | 3.297 | 2.312 | 0.638 | 0.248 | 0.099 |
| 340 | 3.299 | 3.303 | 2.312 | 0.639 | 0.253 | 0.099 |
| 350 | 3.282 | 3.309 | 2.312 | 0.639 | 0.258 | 0.100 |
| 360 | 3.313 | 3.314 | 2.312 | 0.640 | 0.262 | 0.100 |
| 370 | 3.321 | 3.319 | 2.312 | 0.640 | 0.267 | 0.100 |
| 380 | 3.328 | 3.324 | 2.312 | 0.640 | 0.271 | 0.101 |
| 390 | 3.294 | 3.329 | 2.312 | 0.641 | 0.276 | 0.101 |
| 400 | 3.329 | 3.334 | 2.312 | 0.641 | 0.280 | 0.101 |
| 410 | 3.325 | 3.338 | 2.312 | 0.641 | 0.284 | 0.101 |
| 420 | 3.312 | 3.343 | 2.312 | 0.641 | 0.288 | 0.102 |
| 430 | 3.319 | 3.347 | 2.312 | 0.641 | 0.292 | 0.102 |
| 440 | 3.337 | 3.351 | 2.312 | 0.641 | 0.296 | 0.102 |
| 450 | 3.353 | 3.355 | 2.312 | 0.641 | 0.299 | 0.102 |
| 460 | 3.360 | 3.359 | 2.312 | 0.642 | 0.303 | 0.102 |
| 470 | 3.336 | 3.363 | 2.312 | 0.642 | 0.307 | 0.103 |
| 480 | 3.356 | 3.367 | 2.312 | 0.642 | 0.310 | 0.103 |

|              |                        |       |       |       |       |       |       |       |                                        |                                        |
|--------------|------------------------|-------|-------|-------|-------|-------|-------|-------|----------------------------------------|----------------------------------------|
|              |                        | 490   | 3.339 | 3.370 | 2.312 | 0.642 | 0.314 | 0.103 |                                        |                                        |
|              |                        | 500   | 3.363 | 3.374 | 2.312 | 0.642 | 0.317 | 0.103 |                                        |                                        |
|              |                        | 510   | 3.357 | 3.377 | 2.312 | 0.642 | 0.320 | 0.103 |                                        |                                        |
|              |                        | 520   | 3.373 | 3.380 | 2.312 | 0.642 | 0.323 | 0.103 |                                        |                                        |
|              |                        | 530   | 3.386 | 3.383 | 2.312 | 0.642 | 0.326 | 0.103 |                                        |                                        |
|              |                        | 540   | 3.372 | 3.387 | 2.312 | 0.642 | 0.329 | 0.103 |                                        |                                        |
|              |                        | 550   | 3.377 | 3.390 | 2.312 | 0.642 | 0.332 | 0.103 |                                        |                                        |
|              |                        | 560   | 3.367 | 3.392 | 2.312 | 0.642 | 0.335 | 0.103 |                                        |                                        |
|              |                        | 570   | 3.371 | 3.395 | 2.312 | 0.642 | 0.338 | 0.103 |                                        |                                        |
|              |                        | 580   | 3.389 | 3.398 | 2.312 | 0.642 | 0.341 | 0.103 |                                        |                                        |
|              |                        | 590   | 3.401 | 3.401 | 2.312 | 0.642 | 0.343 | 0.103 |                                        |                                        |
|              |                        | 600   | 3.380 | 3.404 | 2.312 | 0.642 | 0.346 | 0.104 |                                        |                                        |
| GFET<br>#S55 | $c^{(CEA)} = 50$<br>nM | -50   | 2.302 | 2.306 | -     | -     | -     | -     | $\tilde{c}^{(CEA)} \approx 45.9947$ nM |                                        |
|              |                        | -40   | 2.275 | 2.306 |       |       |       |       |                                        |                                        |
|              |                        | -30   | 2.287 | 2.306 |       |       |       |       |                                        |                                        |
|              |                        | -20   | 2.289 | 2.306 |       |       |       |       |                                        |                                        |
|              |                        | -10   | 2.282 | 2.306 |       |       |       |       |                                        |                                        |
|              | 0                      | 2.294 | 2.306 | 2.306 | 0.000 | 0.000 | 0.000 |       |                                        |                                        |
|              | 10                     | 2.445 | 2.468 | 2.306 | 0.105 | 0.010 | 0.048 |       |                                        |                                        |
|              | 20                     | 2.585 | 2.598 | 2.306 | 0.194 | 0.020 | 0.079 |       |                                        |                                        |
|              | 30                     | 2.699 | 2.703 | 2.306 | 0.269 | 0.029 | 0.099 |       |                                        |                                        |
|              | 40                     | 2.793 | 2.790 | 2.306 | 0.333 | 0.038 | 0.113 |       |                                        |                                        |
|              | 50                     | 2.840 | 2.861 | 2.306 | 0.387 | 0.047 | 0.122 |       |                                        |                                        |
|              | 60                     | 2.923 | 2.922 | 2.306 | 0.432 | 0.056 | 0.128 |       |                                        |                                        |
|              | 70                     | 2.952 | 2.973 | 2.306 | 0.471 | 0.065 | 0.131 |       |                                        |                                        |
|              | 80                     | 3.018 | 3.016 | 2.306 | 0.504 | 0.073 | 0.134 |       |                                        |                                        |
|              | 90                     | 3.048 | 3.053 | 2.306 | 0.531 | 0.081 | 0.136 |       |                                        |                                        |
|              | 100                    | 3.092 | 3.086 | 2.306 | 0.555 | 0.089 | 0.137 |       |                                        |                                        |
|              | $c^{(AFP)} = 20$<br>nM | 110   | 3.112 | 3.114 | 2.306 | 0.574 | 0.097 | 0.137 |                                        | $\tilde{c}^{(AFP)} \approx 14.8237$ nM |
|              | 120                    | 3.120 | 3.139 | 2.306 | 0.591 | 0.105 | 0.138 |       |                                        |                                        |
|              | $c^{(PTH)} = 20$<br>nM | 130   | 3.119 | 3.161 | 2.306 | 0.605 | 0.112 | 0.138 |                                        | $\tilde{c}^{(PTH)} \approx 38.7112$ nM |
|              | 140                    | 3.155 | 3.180 | 2.306 | 0.617 | 0.119 | 0.138 |       |                                        |                                        |
|              | 150                    | 3.198 | 3.198 | 2.306 | 0.627 | 0.126 | 0.139 |       |                                        |                                        |
|              | 160                    | 3.192 | 3.213 | 2.306 | 0.636 | 0.133 | 0.139 |       |                                        |                                        |
|              | 170                    | 3.226 | 3.227 | 2.306 | 0.643 | 0.140 | 0.139 |       |                                        |                                        |
|              | 180                    | 3.227 | 3.240 | 2.306 | 0.649 | 0.147 | 0.139 |       |                                        |                                        |
|              | 190                    | 3.241 | 3.252 | 2.306 | 0.654 | 0.153 | 0.139 |       |                                        |                                        |
|              | 200                    | 3.256 | 3.262 | 2.306 | 0.659 | 0.159 | 0.139 |       |                                        |                                        |
|              | 210                    | 3.256 | 3.272 | 2.306 | 0.662 | 0.166 | 0.139 |       |                                        |                                        |
|              | 220                    | 3.287 | 3.282 | 2.306 | 0.665 | 0.172 | 0.139 |       |                                        |                                        |
| 230          | 3.291                  | 3.290 | 2.306 | 0.668 | 0.178 | 0.139 |       |       |                                        |                                        |
| 240          | 3.284                  | 3.298 | 2.306 | 0.670 | 0.183 | 0.139 |       |       |                                        |                                        |
| 250          | 3.292                  | 3.306 | 2.306 | 0.672 | 0.189 | 0.139 |       |       |                                        |                                        |
| 260          | 3.306                  | 3.313 | 2.306 | 0.674 | 0.194 | 0.139 |       |       |                                        |                                        |
| 270          | 3.302                  | 3.319 | 2.306 | 0.675 | 0.200 | 0.139 |       |       |                                        |                                        |
| 280          | 3.313                  | 3.326 | 2.306 | 0.676 | 0.205 | 0.139 |       |       |                                        |                                        |



|              |                        |     |       |       |       |       |       |       |                                            |
|--------------|------------------------|-----|-------|-------|-------|-------|-------|-------|--------------------------------------------|
|              |                        | 290 | 3.323 | 3.332 | 2.306 | 0.677 | 0.210 | 0.139 |                                            |
|              |                        | 300 | 3.324 | 3.338 | 2.306 | 0.678 | 0.215 | 0.139 |                                            |
|              |                        | 310 | 3.322 | 3.343 | 2.306 | 0.679 | 0.220 | 0.139 |                                            |
|              |                        | 320 | 3.359 | 3.349 | 2.306 | 0.679 | 0.225 | 0.139 |                                            |
|              |                        | 330 | 3.348 | 3.354 | 2.306 | 0.680 | 0.229 | 0.139 |                                            |
|              |                        | 340 | 3.345 | 3.359 | 2.306 | 0.680 | 0.234 | 0.139 |                                            |
|              |                        | 350 | 3.360 | 3.364 | 2.306 | 0.681 | 0.238 | 0.139 |                                            |
|              |                        | 360 | 3.366 | 3.368 | 2.306 | 0.681 | 0.243 | 0.139 |                                            |
|              |                        | 370 | 3.362 | 3.373 | 2.306 | 0.681 | 0.247 | 0.139 |                                            |
|              |                        | 380 | 3.373 | 3.377 | 2.306 | 0.681 | 0.251 | 0.139 |                                            |
|              |                        | 390 | 3.363 | 3.381 | 2.306 | 0.682 | 0.255 | 0.139 |                                            |
|              |                        | 400 | 3.385 | 3.385 | 2.306 | 0.682 | 0.259 | 0.139 |                                            |
|              |                        | 410 | 3.386 | 3.389 | 2.306 | 0.682 | 0.263 | 0.139 |                                            |
|              |                        | 420 | 3.385 | 3.393 | 2.306 | 0.682 | 0.267 | 0.139 |                                            |
|              |                        | 430 | 3.401 | 3.397 | 2.306 | 0.682 | 0.270 | 0.139 |                                            |
|              |                        | 440 | 3.378 | 3.401 | 2.306 | 0.682 | 0.274 | 0.139 |                                            |
|              |                        | 450 | 3.384 | 3.404 | 2.306 | 0.682 | 0.278 | 0.139 |                                            |
|              |                        | 460 | 3.411 | 3.408 | 2.306 | 0.682 | 0.281 | 0.139 |                                            |
|              |                        | 470 | 3.394 | 3.411 | 2.306 | 0.682 | 0.284 | 0.139 |                                            |
|              |                        | 480 | 3.396 | 3.415 | 2.306 | 0.682 | 0.288 | 0.139 |                                            |
|              |                        | 490 | 3.428 | 3.418 | 2.306 | 0.682 | 0.291 | 0.139 |                                            |
|              |                        | 500 | 3.429 | 3.421 | 2.306 | 0.683 | 0.294 | 0.139 |                                            |
|              |                        | 510 | 3.428 | 3.424 | 2.306 | 0.683 | 0.297 | 0.139 |                                            |
|              |                        | 520 | 3.416 | 3.427 | 2.306 | 0.683 | 0.300 | 0.139 |                                            |
|              |                        | 530 | 3.415 | 3.430 | 2.306 | 0.683 | 0.303 | 0.139 |                                            |
|              |                        | 540 | 3.417 | 3.433 | 2.306 | 0.683 | 0.306 | 0.139 |                                            |
|              |                        | 550 | 3.432 | 3.436 | 2.306 | 0.683 | 0.309 | 0.139 |                                            |
|              |                        | 560 | 3.439 | 3.438 | 2.306 | 0.683 | 0.311 | 0.139 |                                            |
|              |                        | 570 | 3.414 | 3.441 | 2.306 | 0.683 | 0.314 | 0.139 |                                            |
|              |                        | 580 | 3.441 | 3.444 | 2.306 | 0.683 | 0.316 | 0.139 |                                            |
|              |                        | 590 | 3.441 | 3.446 | 2.306 | 0.683 | 0.319 | 0.139 |                                            |
|              |                        | 600 | 3.432 | 3.449 | 2.306 | 0.683 | 0.321 | 0.139 |                                            |
| GFET<br>#S56 | $c^{(CEA)} = 50$<br>nM | -50 | 2.284 | 2.319 | -     | -     | -     | -     | $\tilde{c}^{(CEA)} \approx$<br>47.2534 nM  |
|              |                        | -40 | 2.305 | 2.319 |       |       |       |       |                                            |
|              |                        | -30 | 2.300 | 2.319 |       |       |       |       |                                            |
|              |                        | -20 | 2.311 | 2.319 |       |       |       |       |                                            |
|              |                        | -10 | 2.315 | 2.319 |       |       |       |       |                                            |
|              | $c^{(AFP)} = 20$<br>nM | 0   | 2.332 | 2.319 | 2.319 | 0.000 | 0.000 | 0.000 | $\tilde{c}^{(AFP)} \approx$<br>12.3544 nM  |
|              |                        | 10  | 2.519 | 2.527 | 2.319 | 0.111 | 0.008 | 0.088 |                                            |
|              |                        | 20  | 2.637 | 2.659 | 2.319 | 0.205 | 0.016 | 0.118 |                                            |
|              | $c^{(PTH)} = 50$<br>nM | 30  | 2.756 | 2.756 | 2.319 | 0.284 | 0.024 | 0.128 | $\tilde{c}^{(PTH)} \approx$<br>105.0083 nM |
|              |                        | 40  | 2.848 | 2.833 | 2.319 | 0.351 | 0.032 | 0.131 |                                            |
|              |                        | 50  | 2.908 | 2.898 | 2.319 | 0.407 | 0.039 | 0.132 |                                            |
|              |                        | 60  | 2.946 | 2.953 | 2.319 | 0.454 | 0.047 | 0.133 |                                            |
|              |                        |     | 70    | 3.013 | 3.000 | 2.319 | 0.494 | 0.054 | 0.133                                      |
|              |                        | 80  | 3.019 | 3.041 | 2.319 | 0.527 | 0.061 | 0.133 |                                            |

|     |       |       |       |       |       |       |
|-----|-------|-------|-------|-------|-------|-------|
| 90  | 3.073 | 3.076 | 2.319 | 0.556 | 0.068 | 0.133 |
| 100 | 3.093 | 3.106 | 2.319 | 0.579 | 0.075 | 0.133 |
| 110 | 3.110 | 3.133 | 2.319 | 0.599 | 0.082 | 0.133 |
| 120 | 3.135 | 3.156 | 2.319 | 0.616 | 0.088 | 0.133 |
| 130 | 3.155 | 3.177 | 2.319 | 0.630 | 0.094 | 0.133 |
| 140 | 3.178 | 3.195 | 2.319 | 0.642 | 0.101 | 0.133 |
| 150 | 3.194 | 3.211 | 2.319 | 0.652 | 0.107 | 0.133 |
| 160 | 3.197 | 3.226 | 2.319 | 0.661 | 0.113 | 0.133 |
| 170 | 3.206 | 3.239 | 2.319 | 0.668 | 0.119 | 0.133 |
| 180 | 3.234 | 3.250 | 2.319 | 0.674 | 0.124 | 0.133 |
| 190 | 3.253 | 3.261 | 2.319 | 0.679 | 0.130 | 0.133 |
| 200 | 3.304 | 3.271 | 2.319 | 0.683 | 0.136 | 0.133 |
| 210 | 3.264 | 3.280 | 2.319 | 0.687 | 0.141 | 0.133 |
| 220 | 3.283 | 3.288 | 2.319 | 0.690 | 0.146 | 0.133 |
| 230 | 3.297 | 3.296 | 2.319 | 0.692 | 0.151 | 0.133 |
| 240 | 3.293 | 3.303 | 2.319 | 0.695 | 0.156 | 0.133 |
| 250 | 3.311 | 3.310 | 2.319 | 0.696 | 0.161 | 0.133 |
| 260 | 3.290 | 3.316 | 2.319 | 0.698 | 0.166 | 0.133 |
| 270 | 3.304 | 3.322 | 2.319 | 0.699 | 0.171 | 0.133 |
| 280 | 3.316 | 3.328 | 2.319 | 0.700 | 0.176 | 0.133 |
| 290 | 3.312 | 3.333 | 2.319 | 0.701 | 0.180 | 0.133 |
| 300 | 3.348 | 3.339 | 2.319 | 0.702 | 0.185 | 0.133 |
| 310 | 3.327 | 3.344 | 2.319 | 0.703 | 0.189 | 0.133 |
| 320 | 3.335 | 3.348 | 2.319 | 0.703 | 0.193 | 0.133 |
| 330 | 3.328 | 3.353 | 2.319 | 0.704 | 0.197 | 0.133 |
| 340 | 3.344 | 3.358 | 2.319 | 0.704 | 0.202 | 0.133 |
| 350 | 3.370 | 3.362 | 2.319 | 0.704 | 0.206 | 0.133 |
| 360 | 3.347 | 3.366 | 2.319 | 0.705 | 0.210 | 0.133 |
| 370 | 3.384 | 3.370 | 2.319 | 0.705 | 0.213 | 0.133 |
| 380 | 3.353 | 3.374 | 2.319 | 0.705 | 0.217 | 0.133 |
| 390 | 3.380 | 3.378 | 2.319 | 0.705 | 0.221 | 0.133 |
| 400 | 3.370 | 3.382 | 2.319 | 0.705 | 0.224 | 0.133 |
| 410 | 3.382 | 3.385 | 2.319 | 0.705 | 0.228 | 0.133 |
| 420 | 3.389 | 3.389 | 2.319 | 0.705 | 0.231 | 0.133 |
| 430 | 3.368 | 3.393 | 2.319 | 0.706 | 0.235 | 0.133 |
| 440 | 3.383 | 3.396 | 2.319 | 0.706 | 0.238 | 0.133 |
| 450 | 3.390 | 3.399 | 2.319 | 0.706 | 0.241 | 0.133 |
| 460 | 3.393 | 3.402 | 2.319 | 0.706 | 0.245 | 0.133 |
| 470 | 3.405 | 3.406 | 2.319 | 0.706 | 0.248 | 0.133 |
| 480 | 3.390 | 3.409 | 2.319 | 0.706 | 0.251 | 0.133 |
| 490 | 3.404 | 3.412 | 2.319 | 0.706 | 0.254 | 0.133 |
| 500 | 3.384 | 3.415 | 2.319 | 0.706 | 0.257 | 0.133 |
| 510 | 3.411 | 3.418 | 2.319 | 0.706 | 0.260 | 0.133 |
| 520 | 3.393 | 3.420 | 2.319 | 0.706 | 0.262 | 0.133 |
| 530 | 3.402 | 3.423 | 2.319 | 0.706 | 0.265 | 0.133 |
| 540 | 3.403 | 3.426 | 2.319 | 0.706 | 0.268 | 0.133 |

|              |                        |       |       |       |       |       |       |                                           |                                           |
|--------------|------------------------|-------|-------|-------|-------|-------|-------|-------------------------------------------|-------------------------------------------|
|              |                        | 550   | 3.425 | 3.429 | 2.319 | 0.706 | 0.271 | 0.133                                     |                                           |
|              |                        | 560   | 3.429 | 3.431 | 2.319 | 0.706 | 0.273 | 0.133                                     |                                           |
|              |                        | 570   | 3.421 | 3.434 | 2.319 | 0.706 | 0.276 | 0.133                                     |                                           |
|              |                        | 580   | 3.412 | 3.436 | 2.319 | 0.706 | 0.278 | 0.133                                     |                                           |
|              |                        | 590   | 3.429 | 3.439 | 2.319 | 0.706 | 0.281 | 0.133                                     |                                           |
|              |                        | 600   | 3.394 | 3.441 | 2.319 | 0.706 | 0.283 | 0.133                                     |                                           |
| GFET<br>#S57 | $c^{(CEA)} = 50$<br>nM | -50   | 2.287 | 2.306 | -     | -     | -     | -                                         | $\tilde{c}^{(CEA)} \approx$<br>39.1783 nM |
|              |                        | -40   | 2.303 | 2.306 |       |       |       |                                           |                                           |
|              |                        | -30   | 2.292 | 2.306 |       |       |       |                                           |                                           |
|              |                        | -20   | 2.325 | 2.306 |       |       |       |                                           |                                           |
|              |                        | -10   | 2.262 | 2.306 |       |       |       |                                           |                                           |
|              | 0                      | 2.280 | 2.306 | 2.306 | 0.000 | 0.000 | 0.000 |                                           |                                           |
|              | 10                     | 2.396 | 2.415 | 2.306 | 0.086 | 0.018 | 0.005 |                                           |                                           |
|              | 20                     | 2.487 | 2.512 | 2.306 | 0.161 | 0.036 | 0.010 |                                           |                                           |
|              | 30                     | 2.599 | 2.598 | 2.306 | 0.225 | 0.053 | 0.015 |                                           |                                           |
|              | 40                     | 2.651 | 2.675 | 2.306 | 0.282 | 0.069 | 0.019 |                                           |                                           |
|              | 50                     | 2.718 | 2.743 | 2.306 | 0.330 | 0.085 | 0.023 |                                           |                                           |
|              | 60                     | 2.799 | 2.805 | 2.306 | 0.372 | 0.100 | 0.027 |                                           |                                           |
|              | 70                     | 2.845 | 2.859 | 2.306 | 0.409 | 0.115 | 0.030 |                                           |                                           |
|              | 80                     | 2.903 | 2.908 | 2.306 | 0.440 | 0.129 | 0.034 |                                           |                                           |
|              | 90                     | 2.969 | 2.953 | 2.306 | 0.468 | 0.142 | 0.037 |                                           |                                           |
|              | 100                    | 2.970 | 2.992 | 2.306 | 0.492 | 0.156 | 0.040 |                                           |                                           |
|              | 110                    | 3.023 | 3.029 | 2.306 | 0.512 | 0.168 | 0.042 |                                           |                                           |
|              | 120                    | 3.038 | 3.061 | 2.306 | 0.530 | 0.181 | 0.045 |                                           |                                           |
|              | 130                    | 3.076 | 3.091 | 2.306 | 0.546 | 0.192 | 0.047 |                                           |                                           |
|              | 140                    | 3.116 | 3.118 | 2.306 | 0.559 | 0.204 | 0.050 |                                           |                                           |
|              | 150                    | 3.119 | 3.143 | 2.306 | 0.571 | 0.215 | 0.052 |                                           |                                           |
|              | 160                    | 3.155 | 3.165 | 2.306 | 0.581 | 0.225 | 0.054 |                                           |                                           |
|              | 170                    | 3.174 | 3.186 | 2.306 | 0.590 | 0.236 | 0.056 |                                           |                                           |
|              | 180                    | 3.184 | 3.205 | 2.306 | 0.597 | 0.245 | 0.057 |                                           |                                           |
|              | 190                    | 3.222 | 3.223 | 2.306 | 0.604 | 0.255 | 0.059 |                                           |                                           |
|              | 200                    | 3.235 | 3.240 | 2.306 | 0.609 | 0.264 | 0.060 |                                           |                                           |
|              | 210                    | 3.246 | 3.255 | 2.306 | 0.614 | 0.273 | 0.062 |                                           |                                           |
|              | 220                    | 3.285 | 3.269 | 2.306 | 0.619 | 0.282 | 0.063 |                                           |                                           |
|              | 230                    | 3.272 | 3.282 | 2.306 | 0.622 | 0.290 | 0.064 |                                           |                                           |
|              | 240                    | 3.301 | 3.295 | 2.306 | 0.626 | 0.298 | 0.066 |                                           |                                           |
|              | 250                    | 3.311 | 3.306 | 2.306 | 0.628 | 0.305 | 0.067 |                                           |                                           |
|              | 260                    | 3.288 | 3.317 | 2.306 | 0.631 | 0.313 | 0.068 |                                           |                                           |
|              | 270                    | 3.330 | 3.327 | 2.306 | 0.633 | 0.320 | 0.069 |                                           |                                           |
|              | 280                    | 3.328 | 3.337 | 2.306 | 0.635 | 0.327 | 0.070 |                                           |                                           |
| 290          | 3.332                  | 3.346 | 2.306 | 0.636 | 0.334 | 0.071 |       |                                           |                                           |
| 300          | 3.354                  | 3.355 | 2.306 | 0.638 | 0.340 | 0.071 |       |                                           |                                           |
| 310          | 3.371                  | 3.363 | 2.306 | 0.639 | 0.346 | 0.072 |       |                                           |                                           |
| 320          | 3.350                  | 3.370 | 2.306 | 0.640 | 0.352 | 0.073 |       |                                           |                                           |
| 330          | 3.370                  | 3.378 | 2.306 | 0.641 | 0.358 | 0.073 |       |                                           |                                           |
| 340          | 3.374                  | 3.385 | 2.306 | 0.641 | 0.363 | 0.074 |       |                                           |                                           |
|              | $c^{(AFP)} = 50$<br>nM |       |       |       |       |       |       | $\tilde{c}^{(AFP)} \approx$<br>27.3353 nM |                                           |
|              | $c^{(PTH)} = 2$<br>nM  |       |       |       |       |       |       | $\tilde{c}^{(PTH)} \approx$<br>3.9875 nM  |                                           |

|              |                        |       |       |       |       |       |       |       |                                           |                                           |
|--------------|------------------------|-------|-------|-------|-------|-------|-------|-------|-------------------------------------------|-------------------------------------------|
|              |                        | 350   | 3.367 | 3.391 | 2.306 | 0.642 | 0.369 | 0.075 |                                           |                                           |
|              |                        | 360   | 3.413 | 3.397 | 2.306 | 0.643 | 0.374 | 0.075 |                                           |                                           |
|              |                        | 370   | 3.407 | 3.403 | 2.306 | 0.643 | 0.379 | 0.076 |                                           |                                           |
|              |                        | 380   | 3.400 | 3.409 | 2.306 | 0.644 | 0.384 | 0.076 |                                           |                                           |
|              |                        | 390   | 3.406 | 3.415 | 2.306 | 0.644 | 0.388 | 0.077 |                                           |                                           |
|              |                        | 400   | 3.412 | 3.420 | 2.306 | 0.644 | 0.393 | 0.077 |                                           |                                           |
|              |                        | 410   | 3.412 | 3.425 | 2.306 | 0.645 | 0.397 | 0.077 |                                           |                                           |
|              |                        | 420   | 3.420 | 3.430 | 2.306 | 0.645 | 0.401 | 0.078 |                                           |                                           |
|              |                        | 430   | 3.428 | 3.434 | 2.306 | 0.645 | 0.405 | 0.078 |                                           |                                           |
|              |                        | 440   | 3.438 | 3.439 | 2.306 | 0.645 | 0.409 | 0.078 |                                           |                                           |
|              |                        | 450   | 3.452 | 3.443 | 2.306 | 0.645 | 0.413 | 0.079 |                                           |                                           |
|              |                        | 460   | 3.441 | 3.447 | 2.306 | 0.646 | 0.417 | 0.079 |                                           |                                           |
|              |                        | 470   | 3.448 | 3.451 | 2.306 | 0.646 | 0.420 | 0.079 |                                           |                                           |
|              |                        | 480   | 3.443 | 3.454 | 2.306 | 0.646 | 0.424 | 0.080 |                                           |                                           |
|              |                        | 490   | 3.455 | 3.458 | 2.306 | 0.646 | 0.427 | 0.080 |                                           |                                           |
|              |                        | 500   | 3.453 | 3.461 | 2.306 | 0.646 | 0.430 | 0.080 |                                           |                                           |
|              |                        | 510   | 3.447 | 3.465 | 2.306 | 0.646 | 0.433 | 0.080 |                                           |                                           |
|              |                        | 520   | 3.470 | 3.468 | 2.306 | 0.646 | 0.436 | 0.080 |                                           |                                           |
|              |                        | 530   | 3.448 | 3.471 | 2.306 | 0.646 | 0.439 | 0.081 |                                           |                                           |
|              |                        | 540   | 3.469 | 3.474 | 2.306 | 0.646 | 0.441 | 0.081 |                                           |                                           |
|              |                        | 550   | 3.462 | 3.477 | 2.306 | 0.646 | 0.444 | 0.081 |                                           |                                           |
|              |                        | 560   | 3.479 | 3.479 | 2.306 | 0.646 | 0.446 | 0.081 |                                           |                                           |
|              |                        | 570   | 3.478 | 3.482 | 2.306 | 0.646 | 0.449 | 0.081 |                                           |                                           |
|              |                        | 580   | 3.470 | 3.485 | 2.306 | 0.646 | 0.451 | 0.081 |                                           |                                           |
|              |                        | 590   | 3.478 | 3.487 | 2.306 | 0.646 | 0.453 | 0.081 |                                           |                                           |
|              |                        | 600   | 3.475 | 3.489 | 2.306 | 0.646 | 0.456 | 0.082 |                                           |                                           |
| GFET<br>#S58 | $c^{(CEA)} = 50$<br>nM | -50   | 2.315 | 2.309 | -     | -     | -     | -     | $\tilde{c}^{(CEA)} \approx$<br>47.2133 nM |                                           |
|              |                        | -40   | 2.282 | 2.309 |       |       |       |       |                                           |                                           |
|              |                        | -30   | 2.293 | 2.309 |       |       |       |       |                                           |                                           |
|              |                        | -20   | 2.299 | 2.309 |       |       |       |       |                                           |                                           |
|              |                        | -10   | 2.306 | 2.309 |       |       |       |       |                                           |                                           |
|              | 0                      | 2.298 | 2.309 | 2.309 | 0.000 | 0.000 | 0.000 |       |                                           |                                           |
|              | $c^{(AFP)} = 50$<br>nM | 10    | 2.438 | 2.437 | 2.309 | 0.101 | 0.018 | 0.010 |                                           | $\tilde{c}^{(AFP)} \approx$<br>28.2105 nM |
|              |                        | 20    | 2.525 | 2.549 | 2.309 | 0.186 | 0.036 | 0.018 |                                           |                                           |
|              |                        | 30    | 2.636 | 2.645 | 2.309 | 0.257 | 0.053 | 0.026 |                                           |                                           |
|              |                        | 40    | 2.713 | 2.729 | 2.309 | 0.317 | 0.070 | 0.033 |                                           |                                           |
|              |                        | 50    | 2.810 | 2.803 | 2.309 | 0.368 | 0.086 | 0.040 |                                           |                                           |
|              | $c^{(PTH)} = 5$<br>nM  | 60    | 2.849 | 2.867 | 2.309 | 0.411 | 0.101 | 0.046 |                                           | $\tilde{c}^{(PTH)} \approx$<br>6.9883 nM  |
|              |                        | 70    | 2.913 | 2.923 | 2.309 | 0.447 | 0.116 | 0.051 |                                           |                                           |
|              |                        | 80    | 2.974 | 2.972 | 2.309 | 0.477 | 0.130 | 0.056 |                                           |                                           |
|              |                        | 90    | 3.017 | 3.016 | 2.309 | 0.503 | 0.144 | 0.061 |                                           |                                           |
|              |                        | 100   | 3.042 | 3.055 | 2.309 | 0.524 | 0.157 | 0.065 |                                           |                                           |
|              |                        | 110   | 3.088 | 3.089 | 2.309 | 0.542 | 0.170 | 0.068 |                                           |                                           |
| 120          |                        | 3.100 | 3.120 | 2.309 | 0.558 | 0.182 | 0.072 |       |                                           |                                           |
| 130          | 3.120                  | 3.148 | 2.309 | 0.571 | 0.194 | 0.075 |       |       |                                           |                                           |
| 140          | 3.169                  | 3.173 | 2.309 | 0.581 | 0.206 | 0.077 |       |       |                                           |                                           |

|     |       |       |       |       |       |       |
|-----|-------|-------|-------|-------|-------|-------|
| 150 | 3.190 | 3.196 | 2.309 | 0.591 | 0.217 | 0.080 |
| 160 | 3.215 | 3.217 | 2.309 | 0.598 | 0.227 | 0.082 |
| 170 | 3.206 | 3.235 | 2.309 | 0.605 | 0.238 | 0.084 |
| 180 | 3.241 | 3.253 | 2.309 | 0.610 | 0.248 | 0.086 |
| 190 | 3.267 | 3.268 | 2.309 | 0.615 | 0.257 | 0.088 |
| 200 | 3.289 | 3.283 | 2.309 | 0.619 | 0.266 | 0.090 |
| 210 | 3.311 | 3.296 | 2.309 | 0.622 | 0.275 | 0.091 |
| 220 | 3.308 | 3.309 | 2.309 | 0.625 | 0.284 | 0.092 |
| 230 | 3.315 | 3.321 | 2.309 | 0.627 | 0.292 | 0.093 |
| 240 | 3.332 | 3.332 | 2.309 | 0.629 | 0.300 | 0.095 |
| 250 | 3.336 | 3.342 | 2.309 | 0.630 | 0.307 | 0.096 |
| 260 | 3.328 | 3.352 | 2.309 | 0.632 | 0.315 | 0.096 |
| 270 | 3.377 | 3.361 | 2.309 | 0.633 | 0.322 | 0.097 |
| 280 | 3.395 | 3.369 | 2.309 | 0.634 | 0.329 | 0.098 |
| 290 | 3.389 | 3.377 | 2.309 | 0.635 | 0.335 | 0.099 |
| 300 | 3.383 | 3.385 | 2.309 | 0.636 | 0.342 | 0.099 |
| 310 | 3.405 | 3.392 | 2.309 | 0.636 | 0.348 | 0.100 |
| 320 | 3.404 | 3.399 | 2.309 | 0.637 | 0.354 | 0.100 |
| 330 | 3.403 | 3.406 | 2.309 | 0.637 | 0.359 | 0.101 |
| 340 | 3.420 | 3.412 | 2.309 | 0.637 | 0.365 | 0.101 |
| 350 | 3.414 | 3.418 | 2.309 | 0.638 | 0.370 | 0.102 |
| 360 | 3.393 | 3.424 | 2.309 | 0.638 | 0.375 | 0.102 |
| 370 | 3.450 | 3.429 | 2.309 | 0.638 | 0.380 | 0.102 |
| 380 | 3.444 | 3.434 | 2.309 | 0.638 | 0.385 | 0.102 |
| 390 | 3.454 | 3.439 | 2.309 | 0.638 | 0.389 | 0.103 |
| 400 | 3.444 | 3.444 | 2.309 | 0.639 | 0.394 | 0.103 |
| 410 | 3.434 | 3.448 | 2.309 | 0.639 | 0.398 | 0.103 |
| 420 | 3.431 | 3.453 | 2.309 | 0.639 | 0.402 | 0.103 |
| 430 | 3.465 | 3.457 | 2.309 | 0.639 | 0.406 | 0.104 |
| 440 | 3.463 | 3.461 | 2.309 | 0.639 | 0.410 | 0.104 |
| 450 | 3.445 | 3.465 | 2.309 | 0.639 | 0.414 | 0.104 |
| 460 | 3.474 | 3.469 | 2.309 | 0.639 | 0.417 | 0.104 |
| 470 | 3.476 | 3.472 | 2.309 | 0.639 | 0.420 | 0.104 |
| 480 | 3.458 | 3.475 | 2.309 | 0.639 | 0.424 | 0.104 |
| 490 | 3.474 | 3.479 | 2.309 | 0.639 | 0.427 | 0.104 |
| 500 | 3.476 | 3.482 | 2.309 | 0.639 | 0.430 | 0.104 |
| 510 | 3.468 | 3.485 | 2.309 | 0.639 | 0.433 | 0.104 |
| 520 | 3.490 | 3.488 | 2.309 | 0.639 | 0.436 | 0.105 |
| 530 | 3.493 | 3.491 | 2.309 | 0.639 | 0.438 | 0.105 |
| 540 | 3.477 | 3.493 | 2.309 | 0.639 | 0.441 | 0.105 |
| 550 | 3.496 | 3.496 | 2.309 | 0.639 | 0.444 | 0.105 |
| 560 | 3.464 | 3.498 | 2.309 | 0.639 | 0.446 | 0.105 |
| 570 | 3.487 | 3.501 | 2.309 | 0.639 | 0.448 | 0.105 |
| 580 | 3.494 | 3.503 | 2.309 | 0.639 | 0.451 | 0.105 |
| 590 | 3.528 | 3.505 | 2.309 | 0.639 | 0.453 | 0.105 |
| 600 | 3.497 | 3.508 | 2.309 | 0.639 | 0.455 | 0.105 |

|              |                        |       |       |       |       |       |       |                                           |                                           |
|--------------|------------------------|-------|-------|-------|-------|-------|-------|-------------------------------------------|-------------------------------------------|
| GFET<br>#S59 | $c^{(CEA)} = 50$<br>nM | -50   | 2.296 | 2.294 | -     | -     | -     | -                                         | $\tilde{c}^{(CEA)} \approx$<br>52.1753 nM |
|              |                        | -40   | 2.288 | 2.294 |       |       |       |                                           |                                           |
|              |                        | -30   | 2.279 | 2.294 |       |       |       |                                           |                                           |
|              |                        | -20   | 2.281 | 2.294 |       |       |       |                                           |                                           |
|              |                        | -10   | 2.300 | 2.294 |       |       |       |                                           |                                           |
|              | 0                      | 2.306 | 2.294 | 2.294 | 0.000 | 0.000 | 0.000 |                                           |                                           |
|              | 10                     | 2.489 | 2.486 | 2.294 | 0.112 | 0.019 | 0.061 |                                           |                                           |
|              | 20                     | 2.636 | 2.630 | 2.294 | 0.205 | 0.037 | 0.093 |                                           |                                           |
|              | 30                     | 2.726 | 2.741 | 2.294 | 0.282 | 0.055 | 0.110 |                                           |                                           |
|              | 40                     | 2.816 | 2.831 | 2.294 | 0.346 | 0.072 | 0.119 |                                           |                                           |
|              | 50                     | 2.916 | 2.905 | 2.294 | 0.399 | 0.088 | 0.124 |                                           |                                           |
|              | 60                     | 2.965 | 2.967 | 2.294 | 0.442 | 0.104 | 0.127 |                                           |                                           |
|              | 70                     | 3.015 | 3.019 | 2.294 | 0.479 | 0.119 | 0.128 |                                           |                                           |
|              | 80                     | 3.045 | 3.065 | 2.294 | 0.508 | 0.133 | 0.129 |                                           |                                           |
|              | 90                     | 3.090 | 3.104 | 2.294 | 0.533 | 0.147 | 0.129 |                                           |                                           |
|              | 100                    | 3.147 | 3.138 | 2.294 | 0.554 | 0.161 | 0.130 |                                           |                                           |
|              | 110                    | 3.164 | 3.168 | 2.294 | 0.570 | 0.174 | 0.130 |                                           |                                           |
|              | 120                    | 3.199 | 3.195 | 2.294 | 0.585 | 0.186 | 0.130 |                                           |                                           |
|              | 130                    | 3.223 | 3.218 | 2.294 | 0.596 | 0.199 | 0.130 |                                           |                                           |
|              | 140                    | 3.248 | 3.240 | 2.294 | 0.606 | 0.210 | 0.130 |                                           |                                           |
|              | 150                    | 3.266 | 3.259 | 2.294 | 0.614 | 0.221 | 0.130 |                                           |                                           |
|              | 160                    | 3.298 | 3.276 | 2.294 | 0.620 | 0.232 | 0.130 |                                           |                                           |
|              | 170                    | 3.288 | 3.292 | 2.294 | 0.626 | 0.243 | 0.130 | $\tilde{c}^{(AFP)} \approx$<br>28.6377 nM |                                           |
|              | 180                    | 3.302 | 3.307 | 2.294 | 0.630 | 0.253 | 0.130 |                                           |                                           |
|              | 190                    | 3.289 | 3.320 | 2.294 | 0.634 | 0.262 | 0.130 | $\tilde{c}^{(PTH)} \approx$<br>59.4301 nM |                                           |
|              | 200                    | 3.313 | 3.332 | 2.294 | 0.637 | 0.272 | 0.130 |                                           |                                           |
|              | 210                    | 3.350 | 3.344 | 2.294 | 0.639 | 0.281 | 0.130 |                                           |                                           |
|              | 220                    | 3.358 | 3.355 | 2.294 | 0.642 | 0.289 | 0.130 |                                           |                                           |
|              | 230                    | 3.355 | 3.365 | 2.294 | 0.643 | 0.298 | 0.130 |                                           |                                           |
|              | 240                    | 3.376 | 3.374 | 2.294 | 0.645 | 0.306 | 0.130 |                                           |                                           |
|              | 250                    | 3.396 | 3.383 | 2.294 | 0.646 | 0.313 | 0.130 |                                           |                                           |
|              | 260                    | 3.377 | 3.392 | 2.294 | 0.647 | 0.321 | 0.130 |                                           |                                           |
|              | 270                    | 3.376 | 3.400 | 2.294 | 0.648 | 0.328 | 0.130 |                                           |                                           |
|              | 280                    | 3.404 | 3.407 | 2.294 | 0.648 | 0.335 | 0.130 |                                           |                                           |
|              | 290                    | 3.407 | 3.414 | 2.294 | 0.649 | 0.342 | 0.130 |                                           |                                           |
|              | 300                    | 3.418 | 3.421 | 2.294 | 0.649 | 0.348 | 0.130 |                                           |                                           |
|              | 310                    | 3.434 | 3.428 | 2.294 | 0.650 | 0.354 | 0.130 |                                           |                                           |
|              | 320                    | 3.435 | 3.434 | 2.294 | 0.650 | 0.360 | 0.130 |                                           |                                           |
|              | 330                    | 3.438 | 3.440 | 2.294 | 0.650 | 0.366 | 0.130 |                                           |                                           |
|              | 340                    | 3.455 | 3.446 | 2.294 | 0.651 | 0.371 | 0.130 |                                           |                                           |
| 350          | 3.462                  | 3.451 | 2.294 | 0.651 | 0.377 | 0.130 |       |                                           |                                           |
| 360          | 3.453                  | 3.457 | 2.294 | 0.651 | 0.382 | 0.130 |       |                                           |                                           |
| 370          | 3.457                  | 3.462 | 2.294 | 0.651 | 0.387 | 0.130 |       |                                           |                                           |
| 380          | 3.447                  | 3.467 | 2.294 | 0.651 | 0.392 | 0.130 |       |                                           |                                           |
| 390          | 3.466                  | 3.471 | 2.294 | 0.651 | 0.396 | 0.130 |       |                                           |                                           |
| 400          | 3.489                  | 3.476 | 2.294 | 0.651 | 0.401 | 0.130 |       |                                           |                                           |

|              |                        |       |       |       |       |       |       |       |                                           |                                           |
|--------------|------------------------|-------|-------|-------|-------|-------|-------|-------|-------------------------------------------|-------------------------------------------|
|              |                        | 410   | 3.482 | 3.480 | 2.294 | 0.651 | 0.405 | 0.130 |                                           |                                           |
|              |                        | 420   | 3.519 | 3.484 | 2.294 | 0.651 | 0.409 | 0.130 |                                           |                                           |
|              |                        | 430   | 3.488 | 3.488 | 2.294 | 0.651 | 0.413 | 0.130 |                                           |                                           |
|              |                        | 440   | 3.490 | 3.492 | 2.294 | 0.652 | 0.417 | 0.130 |                                           |                                           |
|              |                        | 450   | 3.488 | 3.496 | 2.294 | 0.652 | 0.420 | 0.130 |                                           |                                           |
|              |                        | 460   | 3.494 | 3.499 | 2.294 | 0.652 | 0.424 | 0.130 |                                           |                                           |
|              |                        | 470   | 3.521 | 3.503 | 2.294 | 0.652 | 0.427 | 0.130 |                                           |                                           |
|              |                        | 480   | 3.513 | 3.506 | 2.294 | 0.652 | 0.431 | 0.130 |                                           |                                           |
|              |                        | 490   | 3.503 | 3.509 | 2.294 | 0.652 | 0.434 | 0.130 |                                           |                                           |
|              |                        | 500   | 3.482 | 3.512 | 2.294 | 0.652 | 0.437 | 0.130 |                                           |                                           |
|              |                        | 510   | 3.508 | 3.515 | 2.294 | 0.652 | 0.440 | 0.130 |                                           |                                           |
|              |                        | 520   | 3.526 | 3.518 | 2.294 | 0.652 | 0.443 | 0.130 |                                           |                                           |
|              |                        | 530   | 3.526 | 3.521 | 2.294 | 0.652 | 0.445 | 0.130 |                                           |                                           |
|              |                        | 540   | 3.522 | 3.524 | 2.294 | 0.652 | 0.448 | 0.130 |                                           |                                           |
|              |                        | 550   | 3.515 | 3.526 | 2.294 | 0.652 | 0.451 | 0.130 |                                           |                                           |
|              |                        | 560   | 3.511 | 3.529 | 2.294 | 0.652 | 0.453 | 0.130 |                                           |                                           |
|              |                        | 570   | 3.536 | 3.531 | 2.294 | 0.652 | 0.455 | 0.130 |                                           |                                           |
|              |                        | 580   | 3.531 | 3.533 | 2.294 | 0.652 | 0.458 | 0.130 |                                           |                                           |
|              |                        | 590   | 3.542 | 3.535 | 2.294 | 0.652 | 0.460 | 0.130 |                                           |                                           |
|              |                        | 600   | 3.551 | 3.537 | 2.294 | 0.652 | 0.462 | 0.130 |                                           |                                           |
| GFET<br>#S60 | $c^{(CEA)} = 50$<br>nM | -50   | 2.328 | 2.332 | -     | -     | -     | -     | $\tilde{c}^{(CEA)} \approx$<br>46.7603 nM |                                           |
|              |                        | -40   | 2.340 | 2.332 |       |       |       |       |                                           |                                           |
|              |                        | -30   | 2.344 | 2.332 |       |       |       |       |                                           |                                           |
|              |                        | -20   | 2.316 | 2.332 |       |       |       |       |                                           |                                           |
|              |                        | -10   | 2.301 | 2.332 |       |       |       |       |                                           |                                           |
|              | 0                      | 2.326 | 2.332 | 2.332 | 0.000 | 0.000 | 0.000 |       |                                           |                                           |
|              | $c^{(AFP)} = 50$<br>nM | 10    | 2.551 | 2.537 | 2.332 | 0.102 | 0.017 | 0.085 |                                           | $\tilde{c}^{(AFP)} \approx$<br>25.7833 nM |
|              |                        | 20    | 2.682 | 2.670 | 2.332 | 0.188 | 0.034 | 0.116 |                                           |                                           |
|              |                        | 30    | 2.762 | 2.770 | 2.332 | 0.261 | 0.050 | 0.127 |                                           |                                           |
|              |                        | 40    | 2.873 | 2.851 | 2.332 | 0.322 | 0.066 | 0.131 |                                           |                                           |
|              |                        | 50    | 2.929 | 2.919 | 2.332 | 0.374 | 0.081 | 0.133 |                                           |                                           |
|              | $c^{(PTH)} = 50$<br>nM | 60    | 2.981 | 2.978 | 2.332 | 0.418 | 0.095 | 0.133 |                                           | $\tilde{c}^{(PTH)} \approx$<br>97.5542 nM |
|              |                        | 70    | 3.039 | 3.029 | 2.332 | 0.455 | 0.109 | 0.133 |                                           |                                           |
|              |                        | 80    | 3.079 | 3.074 | 2.332 | 0.486 | 0.123 | 0.133 |                                           |                                           |
|              |                        | 90    | 3.112 | 3.113 | 2.332 | 0.512 | 0.136 | 0.134 |                                           |                                           |
|              |                        | 100   | 3.175 | 3.148 | 2.332 | 0.534 | 0.148 | 0.134 |                                           |                                           |
|              |                        | 110   | 3.196 | 3.179 | 2.332 | 0.553 | 0.161 | 0.134 |                                           |                                           |
|              |                        | 120   | 3.191 | 3.206 | 2.332 | 0.568 | 0.172 | 0.134 |                                           |                                           |
|              |                        | 130   | 3.221 | 3.231 | 2.332 | 0.582 | 0.184 | 0.134 |                                           |                                           |
|              |                        | 140   | 3.239 | 3.253 | 2.332 | 0.593 | 0.195 | 0.134 |                                           |                                           |
|              |                        | 150   | 3.302 | 3.273 | 2.332 | 0.602 | 0.206 | 0.134 |                                           |                                           |
|              |                        | 160   | 3.298 | 3.292 | 2.332 | 0.610 | 0.216 | 0.134 |                                           |                                           |
|              |                        | 170   | 3.298 | 3.308 | 2.332 | 0.617 | 0.226 | 0.134 |                                           |                                           |
| 180          |                        | 3.340 | 3.324 | 2.332 | 0.623 | 0.235 | 0.134 |       |                                           |                                           |
| 190          | 3.335                  | 3.338 | 2.332 | 0.628 | 0.245 | 0.134 |       |       |                                           |                                           |
| 200          | 3.360                  | 3.351 | 2.332 | 0.632 | 0.254 | 0.134 |       |       |                                           |                                           |

|              |                         |     |       |       |       |       |       |       |                                           |   |   |   |                                           |       |       |       |                             |
|--------------|-------------------------|-----|-------|-------|-------|-------|-------|-------|-------------------------------------------|---|---|---|-------------------------------------------|-------|-------|-------|-----------------------------|
|              |                         | 210 | 3.359 | 3.363 | 2.332 | 0.635 | 0.262 | 0.134 |                                           |   |   |   |                                           |       |       |       |                             |
|              |                         | 220 | 3.356 | 3.374 | 2.332 | 0.638 | 0.271 | 0.134 |                                           |   |   |   |                                           |       |       |       |                             |
|              |                         | 230 | 3.383 | 3.384 | 2.332 | 0.640 | 0.279 | 0.134 |                                           |   |   |   |                                           |       |       |       |                             |
|              |                         | 240 | 3.405 | 3.394 | 2.332 | 0.642 | 0.287 | 0.134 |                                           |   |   |   |                                           |       |       |       |                             |
|              |                         | 250 | 3.387 | 3.404 | 2.332 | 0.644 | 0.294 | 0.134 |                                           |   |   |   |                                           |       |       |       |                             |
|              |                         | 260 | 3.398 | 3.412 | 2.332 | 0.646 | 0.302 | 0.134 |                                           |   |   |   |                                           |       |       |       |                             |
|              |                         | 270 | 3.430 | 3.421 | 2.332 | 0.647 | 0.309 | 0.134 |                                           |   |   |   |                                           |       |       |       |                             |
|              |                         | 280 | 3.421 | 3.429 | 2.332 | 0.648 | 0.315 | 0.134 |                                           |   |   |   |                                           |       |       |       |                             |
|              |                         | 290 | 3.429 | 3.436 | 2.332 | 0.649 | 0.322 | 0.134 |                                           |   |   |   |                                           |       |       |       |                             |
|              |                         | 300 | 3.446 | 3.443 | 2.332 | 0.649 | 0.328 | 0.134 |                                           |   |   |   |                                           |       |       |       |                             |
|              |                         | 310 | 3.444 | 3.450 | 2.332 | 0.650 | 0.334 | 0.134 |                                           |   |   |   |                                           |       |       |       |                             |
|              |                         | 320 | 3.443 | 3.456 | 2.332 | 0.651 | 0.340 | 0.134 |                                           |   |   |   |                                           |       |       |       |                             |
|              |                         | 330 | 3.477 | 3.462 | 2.332 | 0.651 | 0.346 | 0.134 |                                           |   |   |   |                                           |       |       |       |                             |
|              |                         | 340 | 3.442 | 3.468 | 2.332 | 0.651 | 0.352 | 0.134 |                                           |   |   |   |                                           |       |       |       |                             |
|              |                         | 350 | 3.454 | 3.474 | 2.332 | 0.652 | 0.357 | 0.134 |                                           |   |   |   |                                           |       |       |       |                             |
|              |                         | 360 | 3.473 | 3.480 | 2.332 | 0.652 | 0.362 | 0.134 |                                           |   |   |   |                                           |       |       |       |                             |
|              |                         | 370 | 3.470 | 3.485 | 2.332 | 0.652 | 0.367 | 0.134 |                                           |   |   |   |                                           |       |       |       |                             |
|              |                         | 380 | 3.483 | 3.490 | 2.332 | 0.652 | 0.372 | 0.134 |                                           |   |   |   |                                           |       |       |       |                             |
|              |                         | 390 | 3.466 | 3.495 | 2.332 | 0.653 | 0.377 | 0.134 |                                           |   |   |   |                                           |       |       |       |                             |
|              |                         | 400 | 3.497 | 3.499 | 2.332 | 0.653 | 0.381 | 0.134 |                                           |   |   |   |                                           |       |       |       |                             |
|              |                         | 410 | 3.517 | 3.504 | 2.332 | 0.653 | 0.386 | 0.134 |                                           |   |   |   |                                           |       |       |       |                             |
|              |                         | 420 | 3.509 | 3.508 | 2.332 | 0.653 | 0.390 | 0.134 |                                           |   |   |   |                                           |       |       |       |                             |
|              |                         | 430 | 3.498 | 3.512 | 2.332 | 0.653 | 0.394 | 0.134 |                                           |   |   |   |                                           |       |       |       |                             |
|              |                         | 440 | 3.530 | 3.516 | 2.332 | 0.653 | 0.398 | 0.134 |                                           |   |   |   |                                           |       |       |       |                             |
|              |                         | 450 | 3.514 | 3.520 | 2.332 | 0.653 | 0.402 | 0.134 |                                           |   |   |   |                                           |       |       |       |                             |
|              |                         | 460 | 3.514 | 3.524 | 2.332 | 0.653 | 0.405 | 0.134 |                                           |   |   |   |                                           |       |       |       |                             |
|              |                         | 470 | 3.507 | 3.527 | 2.332 | 0.653 | 0.409 | 0.134 |                                           |   |   |   |                                           |       |       |       |                             |
|              |                         | 480 | 3.501 | 3.531 | 2.332 | 0.653 | 0.412 | 0.134 |                                           |   |   |   |                                           |       |       |       |                             |
|              |                         | 490 | 3.532 | 3.534 | 2.332 | 0.653 | 0.416 | 0.134 |                                           |   |   |   |                                           |       |       |       |                             |
|              |                         | 500 | 3.542 | 3.537 | 2.332 | 0.653 | 0.419 | 0.134 |                                           |   |   |   |                                           |       |       |       |                             |
|              |                         | 510 | 3.536 | 3.540 | 2.332 | 0.653 | 0.422 | 0.134 |                                           |   |   |   |                                           |       |       |       |                             |
|              |                         | 520 | 3.551 | 3.543 | 2.332 | 0.653 | 0.425 | 0.134 |                                           |   |   |   |                                           |       |       |       |                             |
|              |                         | 530 | 3.547 | 3.546 | 2.332 | 0.653 | 0.428 | 0.134 |                                           |   |   |   |                                           |       |       |       |                             |
|              |                         | 540 | 3.553 | 3.549 | 2.332 | 0.653 | 0.430 | 0.134 |                                           |   |   |   |                                           |       |       |       |                             |
|              |                         | 550 | 3.565 | 3.552 | 2.332 | 0.653 | 0.433 | 0.134 |                                           |   |   |   |                                           |       |       |       |                             |
|              |                         | 560 | 3.587 | 3.554 | 2.332 | 0.653 | 0.436 | 0.134 |                                           |   |   |   |                                           |       |       |       |                             |
|              |                         | 570 | 3.566 | 3.557 | 2.332 | 0.653 | 0.438 | 0.134 |                                           |   |   |   |                                           |       |       |       |                             |
|              |                         | 580 | 3.568 | 3.559 | 2.332 | 0.653 | 0.441 | 0.134 |                                           |   |   |   |                                           |       |       |       |                             |
|              |                         | 590 | 3.565 | 3.562 | 2.332 | 0.653 | 0.443 | 0.134 |                                           |   |   |   |                                           |       |       |       |                             |
|              |                         | 600 | 3.556 | 3.564 | 2.332 | 0.653 | 0.445 | 0.134 |                                           |   |   |   |                                           |       |       |       |                             |
| GFET<br>#S61 | $c^{(CEA)} = 50$<br>nM  | -50 | 2.293 | 2.306 | -     | -     | -     | -     | $\tilde{c}^{(CEA)} \approx$<br>49.2210 nM |   |   |   |                                           |       |       |       |                             |
|              |                         | -40 | 2.297 | 2.306 |       |       |       |       |                                           |   |   |   |                                           |       |       |       |                             |
|              | $c^{(AFP)} = 100$<br>nM | -30 | 2.322 | 2.306 |       |       |       |       | -                                         | - | - | - | $\tilde{c}^{(AFP)} \approx$<br>53.5521 nM |       |       |       |                             |
|              |                         | -20 | 2.302 | 2.306 |       |       |       |       |                                           |   |   |   |                                           |       |       |       |                             |
|              | $c^{(PTH)} = 2$<br>nM   | -10 | 2.313 | 2.306 |       |       |       |       |                                           |   |   |   | 2.306                                     | 0.000 | 0.000 | 0.000 | $\tilde{c}^{(PTH)} \approx$ |
|              |                         | 0   | 2.258 | 2.306 |       |       |       |       |                                           |   |   |   |                                           |       |       |       |                             |



|  |  |     |       |       |       |       |       |       |           |
|--|--|-----|-------|-------|-------|-------|-------|-------|-----------|
|  |  | 10  | 2.423 | 2.451 | 2.306 | 0.105 | 0.035 | 0.005 | 3.8785 nM |
|  |  | 20  | 2.561 | 2.577 | 2.306 | 0.193 | 0.069 | 0.010 |           |
|  |  | 30  | 2.704 | 2.686 | 2.306 | 0.266 | 0.100 | 0.015 |           |
|  |  | 40  | 2.797 | 2.781 | 2.306 | 0.327 | 0.129 | 0.019 |           |
|  |  | 50  | 2.849 | 2.864 | 2.306 | 0.378 | 0.157 | 0.023 |           |
|  |  | 60  | 2.922 | 2.937 | 2.306 | 0.421 | 0.183 | 0.026 |           |
|  |  | 70  | 2.977 | 3.001 | 2.306 | 0.457 | 0.207 | 0.030 |           |
|  |  | 80  | 3.059 | 3.057 | 2.306 | 0.487 | 0.230 | 0.033 |           |
|  |  | 90  | 3.111 | 3.106 | 2.306 | 0.512 | 0.252 | 0.036 |           |
|  |  | 100 | 3.161 | 3.151 | 2.306 | 0.533 | 0.272 | 0.039 |           |
|  |  | 110 | 3.177 | 3.190 | 2.306 | 0.551 | 0.291 | 0.042 |           |
|  |  | 120 | 3.219 | 3.225 | 2.306 | 0.566 | 0.309 | 0.045 |           |
|  |  | 130 | 3.238 | 3.257 | 2.306 | 0.578 | 0.326 | 0.047 |           |
|  |  | 140 | 3.303 | 3.285 | 2.306 | 0.588 | 0.342 | 0.049 |           |
|  |  | 150 | 3.319 | 3.310 | 2.306 | 0.597 | 0.357 | 0.051 |           |
|  |  | 160 | 3.352 | 3.334 | 2.306 | 0.604 | 0.370 | 0.053 |           |
|  |  | 170 | 3.362 | 3.355 | 2.306 | 0.610 | 0.384 | 0.055 |           |
|  |  | 180 | 3.374 | 3.374 | 2.306 | 0.615 | 0.396 | 0.057 |           |
|  |  | 190 | 3.382 | 3.391 | 2.306 | 0.619 | 0.408 | 0.059 |           |
|  |  | 200 | 3.413 | 3.407 | 2.306 | 0.623 | 0.418 | 0.060 |           |
|  |  | 210 | 3.418 | 3.422 | 2.306 | 0.625 | 0.429 | 0.062 |           |
|  |  | 220 | 3.422 | 3.435 | 2.306 | 0.628 | 0.438 | 0.063 |           |
|  |  | 230 | 3.457 | 3.447 | 2.306 | 0.630 | 0.447 | 0.064 |           |
|  |  | 240 | 3.451 | 3.459 | 2.306 | 0.632 | 0.456 | 0.065 |           |
|  |  | 250 | 3.462 | 3.469 | 2.306 | 0.633 | 0.464 | 0.067 |           |
|  |  | 260 | 3.499 | 3.479 | 2.306 | 0.634 | 0.471 | 0.068 |           |
|  |  | 270 | 3.481 | 3.488 | 2.306 | 0.635 | 0.478 | 0.069 |           |
|  |  | 280 | 3.494 | 3.497 | 2.306 | 0.636 | 0.485 | 0.070 |           |
|  |  | 290 | 3.490 | 3.504 | 2.306 | 0.637 | 0.491 | 0.070 |           |
|  |  | 300 | 3.506 | 3.512 | 2.306 | 0.637 | 0.497 | 0.071 |           |
|  |  | 310 | 3.513 | 3.518 | 2.306 | 0.638 | 0.503 | 0.072 |           |
|  |  | 320 | 3.524 | 3.525 | 2.306 | 0.638 | 0.508 | 0.073 |           |
|  |  | 330 | 3.518 | 3.531 | 2.306 | 0.639 | 0.513 | 0.073 |           |
|  |  | 340 | 3.547 | 3.536 | 2.306 | 0.639 | 0.517 | 0.074 |           |
|  |  | 350 | 3.541 | 3.541 | 2.306 | 0.639 | 0.522 | 0.075 |           |
|  |  | 360 | 3.527 | 3.546 | 2.306 | 0.639 | 0.526 | 0.075 |           |
|  |  | 370 | 3.536 | 3.551 | 2.306 | 0.640 | 0.529 | 0.076 |           |
|  |  | 380 | 3.593 | 3.555 | 2.306 | 0.640 | 0.533 | 0.076 |           |
|  |  | 390 | 3.565 | 3.559 | 2.306 | 0.640 | 0.536 | 0.077 |           |
|  |  | 400 | 3.548 | 3.562 | 2.306 | 0.640 | 0.540 | 0.077 |           |
|  |  | 410 | 3.552 | 3.566 | 2.306 | 0.640 | 0.542 | 0.077 |           |
|  |  | 420 | 3.555 | 3.569 | 2.306 | 0.640 | 0.545 | 0.078 |           |
|  |  | 430 | 3.544 | 3.572 | 2.306 | 0.640 | 0.548 | 0.078 |           |
|  |  | 440 | 3.589 | 3.575 | 2.306 | 0.640 | 0.550 | 0.079 |           |
|  |  | 450 | 3.562 | 3.578 | 2.306 | 0.640 | 0.553 | 0.079 |           |
|  |  | 460 | 3.582 | 3.580 | 2.306 | 0.640 | 0.555 | 0.079 |           |

|              |                                                                            |       |       |       |       |       |       |       |                                                                                                                            |
|--------------|----------------------------------------------------------------------------|-------|-------|-------|-------|-------|-------|-------|----------------------------------------------------------------------------------------------------------------------------|
|              |                                                                            | 470   | 3.578 | 3.582 | 2.306 | 0.640 | 0.557 | 0.079 |                                                                                                                            |
|              |                                                                            | 480   | 3.574 | 3.585 | 2.306 | 0.640 | 0.559 | 0.080 |                                                                                                                            |
|              |                                                                            | 490   | 3.576 | 3.587 | 2.306 | 0.640 | 0.561 | 0.080 |                                                                                                                            |
|              |                                                                            | 500   | 3.613 | 3.589 | 2.306 | 0.640 | 0.562 | 0.080 |                                                                                                                            |
|              |                                                                            | 510   | 3.574 | 3.591 | 2.306 | 0.640 | 0.564 | 0.080 |                                                                                                                            |
|              |                                                                            | 520   | 3.580 | 3.592 | 2.306 | 0.640 | 0.565 | 0.081 |                                                                                                                            |
|              |                                                                            | 530   | 3.591 | 3.594 | 2.306 | 0.640 | 0.567 | 0.081 |                                                                                                                            |
|              |                                                                            | 540   | 3.590 | 3.595 | 2.306 | 0.640 | 0.568 | 0.081 |                                                                                                                            |
|              |                                                                            | 550   | 3.585 | 3.597 | 2.306 | 0.640 | 0.569 | 0.081 |                                                                                                                            |
|              |                                                                            | 560   | 3.596 | 3.598 | 2.306 | 0.640 | 0.571 | 0.081 |                                                                                                                            |
|              |                                                                            | 570   | 3.583 | 3.599 | 2.306 | 0.640 | 0.572 | 0.081 |                                                                                                                            |
|              |                                                                            | 580   | 3.620 | 3.601 | 2.306 | 0.640 | 0.573 | 0.082 |                                                                                                                            |
|              |                                                                            | 590   | 3.595 | 3.602 | 2.306 | 0.640 | 0.574 | 0.082 |                                                                                                                            |
|              |                                                                            | 600   | 3.586 | 3.603 | 2.306 | 0.640 | 0.575 | 0.082 |                                                                                                                            |
| GFET<br>#S62 | $c^{(CEA)} = 50$<br>nM<br>$c^{(AFP)} = 100$<br>nM<br>$c^{(PTH)} = 5$<br>nM | -50   | 2.317 | 2.336 | -     | -     | -     | -     | $\tilde{c}^{(CEA)} \approx 39.7522$ nM<br>$\tilde{c}^{(AFP)} \approx 51.0793$ nM<br>$\tilde{c}^{(PTH)} \approx 15.7743$ nM |
|              |                                                                            | -40   | 2.326 | 2.336 |       |       |       |       |                                                                                                                            |
|              |                                                                            | -30   | 2.320 | 2.336 |       |       |       |       |                                                                                                                            |
|              |                                                                            | -20   | 2.324 | 2.336 |       |       |       |       |                                                                                                                            |
|              |                                                                            | -10   | 2.356 | 2.336 |       |       |       |       |                                                                                                                            |
|              |                                                                            | 0     | 2.328 | 2.336 | 2.336 | 0.000 | 0.000 | 0.000 |                                                                                                                            |
|              |                                                                            | 10    | 2.466 | 2.476 | 2.336 | 0.086 | 0.035 | 0.019 |                                                                                                                            |
|              |                                                                            | 20    | 2.617 | 2.600 | 2.336 | 0.161 | 0.067 | 0.036 |                                                                                                                            |
|              |                                                                            | 30    | 2.700 | 2.708 | 2.336 | 0.225 | 0.098 | 0.049 |                                                                                                                            |
|              |                                                                            | 40    | 2.806 | 2.804 | 2.336 | 0.281 | 0.127 | 0.060 |                                                                                                                            |
|              |                                                                            | 50    | 2.904 | 2.889 | 2.336 | 0.329 | 0.155 | 0.069 |                                                                                                                            |
|              |                                                                            | 60    | 2.961 | 2.964 | 2.336 | 0.371 | 0.180 | 0.077 |                                                                                                                            |
|              |                                                                            | 70    | 3.038 | 3.031 | 2.336 | 0.407 | 0.205 | 0.083 |                                                                                                                            |
|              |                                                                            | 80    | 3.099 | 3.091 | 2.336 | 0.438 | 0.227 | 0.089 |                                                                                                                            |
|              |                                                                            | 90    | 3.147 | 3.144 | 2.336 | 0.465 | 0.249 | 0.093 |                                                                                                                            |
|              |                                                                            | 100   | 3.191 | 3.191 | 2.336 | 0.489 | 0.269 | 0.097 |                                                                                                                            |
|              |                                                                            | 110   | 3.204 | 3.233 | 2.336 | 0.509 | 0.288 | 0.100 |                                                                                                                            |
|              |                                                                            | 120   | 3.270 | 3.271 | 2.336 | 0.526 | 0.306 | 0.102 |                                                                                                                            |
|              |                                                                            | 130   | 3.304 | 3.306 | 2.336 | 0.542 | 0.323 | 0.105 |                                                                                                                            |
|              |                                                                            | 140   | 3.317 | 3.336 | 2.336 | 0.555 | 0.339 | 0.106 |                                                                                                                            |
|              |                                                                            | 150   | 3.349 | 3.364 | 2.336 | 0.566 | 0.355 | 0.108 |                                                                                                                            |
|              |                                                                            | 160   | 3.377 | 3.389 | 2.336 | 0.576 | 0.369 | 0.109 |                                                                                                                            |
|              |                                                                            | 170   | 3.392 | 3.412 | 2.336 | 0.584 | 0.382 | 0.110 |                                                                                                                            |
|              |                                                                            | 180   | 3.428 | 3.433 | 2.336 | 0.592 | 0.395 | 0.111 |                                                                                                                            |
|              |                                                                            | 190   | 3.441 | 3.452 | 2.336 | 0.598 | 0.407 | 0.112 |                                                                                                                            |
|              |                                                                            | 200   | 3.476 | 3.469 | 2.336 | 0.603 | 0.418 | 0.112 |                                                                                                                            |
| 210          | 3.482                                                                      | 3.485 | 2.336 | 0.608 | 0.428 | 0.113 |       |       |                                                                                                                            |
| 220          | 3.485                                                                      | 3.500 | 2.336 | 0.612 | 0.438 | 0.113 |       |       |                                                                                                                            |
| 230          | 3.501                                                                      | 3.513 | 2.336 | 0.616 | 0.448 | 0.113 |       |       |                                                                                                                            |
| 240          | 3.521                                                                      | 3.525 | 2.336 | 0.619 | 0.456 | 0.114 |       |       |                                                                                                                            |
| 250          | 3.530                                                                      | 3.536 | 2.336 | 0.621 | 0.465 | 0.114 |       |       |                                                                                                                            |
| 260          | 3.531                                                                      | 3.546 | 2.336 | 0.624 | 0.473 | 0.114 |       |       |                                                                                                                            |

|              |                         |                        |       |       |       |       |       |       |                                           |                                           |
|--------------|-------------------------|------------------------|-------|-------|-------|-------|-------|-------|-------------------------------------------|-------------------------------------------|
|              |                         | 270                    | 3.553 | 3.556 | 2.336 | 0.626 | 0.480 | 0.114 |                                           |                                           |
|              |                         | 280                    | 3.571 | 3.565 | 2.336 | 0.627 | 0.487 | 0.114 |                                           |                                           |
|              |                         | 290                    | 3.575 | 3.573 | 2.336 | 0.629 | 0.493 | 0.114 |                                           |                                           |
|              |                         | 300                    | 3.583 | 3.580 | 2.336 | 0.630 | 0.500 | 0.115 |                                           |                                           |
|              |                         | 310                    | 3.572 | 3.587 | 2.336 | 0.631 | 0.505 | 0.115 |                                           |                                           |
|              |                         | 320                    | 3.579 | 3.594 | 2.336 | 0.632 | 0.511 | 0.115 |                                           |                                           |
|              |                         | 330                    | 3.589 | 3.600 | 2.336 | 0.633 | 0.516 | 0.115 |                                           |                                           |
|              |                         | 340                    | 3.572 | 3.606 | 2.336 | 0.634 | 0.521 | 0.115 |                                           |                                           |
|              |                         | 350                    | 3.615 | 3.611 | 2.336 | 0.634 | 0.526 | 0.115 |                                           |                                           |
|              |                         | 360                    | 3.601 | 3.616 | 2.336 | 0.635 | 0.530 | 0.115 |                                           |                                           |
|              |                         | 370                    | 3.602 | 3.620 | 2.336 | 0.636 | 0.534 | 0.115 |                                           |                                           |
|              |                         | 380                    | 3.611 | 3.625 | 2.336 | 0.636 | 0.538 | 0.115 |                                           |                                           |
|              |                         | 390                    | 3.652 | 3.629 | 2.336 | 0.636 | 0.541 | 0.115 |                                           |                                           |
|              |                         | 400                    | 3.659 | 3.632 | 2.336 | 0.637 | 0.545 | 0.115 |                                           |                                           |
|              |                         | 410                    | 3.657 | 3.636 | 2.336 | 0.637 | 0.548 | 0.115 |                                           |                                           |
|              |                         | 420                    | 3.644 | 3.639 | 2.336 | 0.637 | 0.551 | 0.115 |                                           |                                           |
|              |                         | 430                    | 3.660 | 3.642 | 2.336 | 0.637 | 0.554 | 0.115 |                                           |                                           |
|              |                         | 440                    | 3.631 | 3.645 | 2.336 | 0.637 | 0.557 | 0.115 |                                           |                                           |
|              |                         | 450                    | 3.634 | 3.648 | 2.336 | 0.638 | 0.559 | 0.115 |                                           |                                           |
|              |                         | 460                    | 3.632 | 3.650 | 2.336 | 0.638 | 0.561 | 0.115 |                                           |                                           |
|              |                         | 470                    | 3.641 | 3.652 | 2.336 | 0.638 | 0.564 | 0.115 |                                           |                                           |
|              |                         | 480                    | 3.659 | 3.655 | 2.336 | 0.638 | 0.566 | 0.115 |                                           |                                           |
|              |                         | 490                    | 3.624 | 3.657 | 2.336 | 0.638 | 0.568 | 0.115 |                                           |                                           |
|              |                         | 500                    | 3.659 | 3.659 | 2.336 | 0.638 | 0.570 | 0.115 |                                           |                                           |
|              |                         | 510                    | 3.658 | 3.660 | 2.336 | 0.638 | 0.571 | 0.115 |                                           |                                           |
|              |                         | 520                    | 3.660 | 3.662 | 2.336 | 0.638 | 0.573 | 0.115 |                                           |                                           |
|              |                         | 530                    | 3.664 | 3.664 | 2.336 | 0.638 | 0.575 | 0.115 |                                           |                                           |
|              |                         | 540                    | 3.673 | 3.665 | 2.336 | 0.638 | 0.576 | 0.115 |                                           |                                           |
|              |                         | 550                    | 3.687 | 3.667 | 2.336 | 0.638 | 0.578 | 0.115 |                                           |                                           |
|              |                         | 560                    | 3.652 | 3.668 | 2.336 | 0.638 | 0.579 | 0.115 |                                           |                                           |
|              |                         | 570                    | 3.670 | 3.669 | 2.336 | 0.638 | 0.580 | 0.115 |                                           |                                           |
|              |                         | 580                    | 3.656 | 3.671 | 2.336 | 0.638 | 0.581 | 0.115 |                                           |                                           |
|              |                         | 590                    | 3.667 | 3.672 | 2.336 | 0.638 | 0.582 | 0.115 |                                           |                                           |
|              |                         | 600                    | 3.654 | 3.673 | 2.336 | 0.638 | 0.583 | 0.115 |                                           |                                           |
| GFET<br>#S63 | $c^{(CEA)} = 50$<br>nM  | -50                    | 2.312 | 2.298 | -     | -     | -     | -     | $\tilde{c}^{(CEA)} \approx$<br>41.9964 nM |                                           |
|              |                         | -40                    | 2.280 | 2.298 |       |       |       |       |                                           |                                           |
|              |                         | -30                    | 2.267 | 2.298 |       |       |       |       |                                           |                                           |
|              |                         | -20                    | 2.281 | 2.298 |       |       |       |       |                                           |                                           |
|              |                         | -10                    | 2.272 | 2.298 |       |       |       |       |                                           |                                           |
|              | $c^{(AFP)} = 100$<br>nM | 0                      | 2.304 | 2.298 | 2.298 | 0.000 | 0.000 | 0.000 | $\tilde{c}^{(AFP)} \approx$<br>53.0976 nM |                                           |
|              |                         | 10                     | 2.450 | 2.474 | 2.298 | 0.089 | 0.036 | 0.050 |                                           |                                           |
|              |                         | $c^{(PTH)} = 20$<br>nM | 20    | 2.617 | 2.614 | 2.298 | 0.166 | 0.070 | 0.080                                     | $\tilde{c}^{(PTH)} \approx$<br>48.7655 nM |
|              |                         |                        | 30    | 2.753 | 2.729 | 2.298 | 0.231 | 0.102 | 0.098                                     |                                           |
|              |                         |                        | 40    | 2.827 | 2.826 | 2.298 | 0.288 | 0.132 | 0.108                                     |                                           |
|              |                         |                        | 50    | 2.918 | 2.909 | 2.298 | 0.336 | 0.160 | 0.115                                     |                                           |
|              |                         |                        | 60    | 2.993 | 2.980 | 2.298 | 0.377 | 0.186 | 0.118                                     |                                           |

|     |       |       |       |       |       |       |
|-----|-------|-------|-------|-------|-------|-------|
| 70  | 3.041 | 3.043 | 2.298 | 0.413 | 0.211 | 0.120 |
| 80  | 3.108 | 3.098 | 2.298 | 0.444 | 0.234 | 0.122 |
| 90  | 3.135 | 3.147 | 2.298 | 0.470 | 0.256 | 0.122 |
| 100 | 3.202 | 3.191 | 2.298 | 0.492 | 0.277 | 0.123 |
| 110 | 3.198 | 3.230 | 2.298 | 0.512 | 0.297 | 0.123 |
| 120 | 3.268 | 3.265 | 2.298 | 0.528 | 0.315 | 0.123 |
| 130 | 3.303 | 3.296 | 2.298 | 0.542 | 0.332 | 0.123 |
| 140 | 3.317 | 3.325 | 2.298 | 0.555 | 0.348 | 0.124 |
| 150 | 3.334 | 3.350 | 2.298 | 0.565 | 0.363 | 0.124 |
| 160 | 3.362 | 3.374 | 2.298 | 0.574 | 0.378 | 0.124 |
| 170 | 3.400 | 3.395 | 2.298 | 0.582 | 0.391 | 0.124 |
| 180 | 3.421 | 3.414 | 2.298 | 0.588 | 0.404 | 0.124 |
| 190 | 3.433 | 3.432 | 2.298 | 0.594 | 0.416 | 0.124 |
| 200 | 3.429 | 3.448 | 2.298 | 0.599 | 0.427 | 0.124 |
| 210 | 3.439 | 3.462 | 2.298 | 0.603 | 0.437 | 0.124 |
| 220 | 3.488 | 3.476 | 2.298 | 0.607 | 0.447 | 0.124 |
| 230 | 3.481 | 3.488 | 2.298 | 0.610 | 0.456 | 0.124 |
| 240 | 3.479 | 3.500 | 2.298 | 0.612 | 0.465 | 0.124 |
| 250 | 3.513 | 3.510 | 2.298 | 0.615 | 0.473 | 0.124 |
| 260 | 3.533 | 3.520 | 2.298 | 0.617 | 0.481 | 0.124 |
| 270 | 3.517 | 3.529 | 2.298 | 0.618 | 0.488 | 0.124 |
| 280 | 3.547 | 3.537 | 2.298 | 0.620 | 0.495 | 0.124 |
| 290 | 3.545 | 3.545 | 2.298 | 0.621 | 0.502 | 0.124 |
| 300 | 3.537 | 3.552 | 2.298 | 0.622 | 0.508 | 0.124 |
| 310 | 3.572 | 3.558 | 2.298 | 0.623 | 0.513 | 0.124 |
| 320 | 3.571 | 3.564 | 2.298 | 0.624 | 0.519 | 0.124 |
| 330 | 3.546 | 3.570 | 2.298 | 0.624 | 0.524 | 0.124 |
| 340 | 3.568 | 3.575 | 2.298 | 0.625 | 0.528 | 0.124 |
| 350 | 3.609 | 3.580 | 2.298 | 0.625 | 0.533 | 0.124 |
| 360 | 3.557 | 3.585 | 2.298 | 0.626 | 0.537 | 0.124 |
| 370 | 3.584 | 3.589 | 2.298 | 0.626 | 0.541 | 0.124 |
| 380 | 3.554 | 3.593 | 2.298 | 0.627 | 0.545 | 0.124 |
| 390 | 3.585 | 3.597 | 2.298 | 0.627 | 0.548 | 0.124 |
| 400 | 3.602 | 3.600 | 2.298 | 0.627 | 0.551 | 0.124 |
| 410 | 3.600 | 3.604 | 2.298 | 0.627 | 0.554 | 0.124 |
| 420 | 3.596 | 3.607 | 2.298 | 0.627 | 0.557 | 0.124 |
| 430 | 3.607 | 3.610 | 2.298 | 0.628 | 0.560 | 0.124 |
| 440 | 3.628 | 3.612 | 2.298 | 0.628 | 0.563 | 0.124 |
| 450 | 3.612 | 3.615 | 2.298 | 0.628 | 0.565 | 0.124 |
| 460 | 3.614 | 3.617 | 2.298 | 0.628 | 0.567 | 0.124 |
| 470 | 3.630 | 3.619 | 2.298 | 0.628 | 0.569 | 0.124 |
| 480 | 3.606 | 3.621 | 2.298 | 0.628 | 0.571 | 0.124 |
| 490 | 3.617 | 3.623 | 2.298 | 0.628 | 0.573 | 0.124 |
| 500 | 3.593 | 3.625 | 2.298 | 0.628 | 0.575 | 0.124 |
| 510 | 3.624 | 3.627 | 2.298 | 0.628 | 0.577 | 0.124 |
| 520 | 3.622 | 3.628 | 2.298 | 0.628 | 0.578 | 0.124 |

|              |                                                                             |       |       |       |       |       |       |       |                                                                                                                            |
|--------------|-----------------------------------------------------------------------------|-------|-------|-------|-------|-------|-------|-------|----------------------------------------------------------------------------------------------------------------------------|
|              |                                                                             | 530   | 3.609 | 3.630 | 2.298 | 0.628 | 0.580 | 0.124 |                                                                                                                            |
|              |                                                                             | 540   | 3.624 | 3.631 | 2.298 | 0.628 | 0.581 | 0.124 |                                                                                                                            |
|              |                                                                             | 550   | 3.641 | 3.633 | 2.298 | 0.628 | 0.582 | 0.124 |                                                                                                                            |
|              |                                                                             | 560   | 3.624 | 3.634 | 2.298 | 0.628 | 0.584 | 0.124 |                                                                                                                            |
|              |                                                                             | 570   | 3.623 | 3.635 | 2.298 | 0.628 | 0.585 | 0.124 |                                                                                                                            |
|              |                                                                             | 580   | 3.614 | 3.636 | 2.298 | 0.628 | 0.586 | 0.124 |                                                                                                                            |
|              |                                                                             | 590   | 3.636 | 3.637 | 2.298 | 0.628 | 0.587 | 0.124 |                                                                                                                            |
|              |                                                                             | 600   | 3.647 | 3.638 | 2.298 | 0.628 | 0.588 | 0.124 |                                                                                                                            |
| GFET<br>#S64 | $c^{(CEA)} = 50$<br>nM<br>$c^{(AFP)} = 100$<br>nM<br>$c^{(PTH)} = 50$<br>nM | -50   | 2.291 | 2.297 | -     | -     | -     | -     | $\tilde{c}^{(CEA)} \approx 46.8943$ nM<br>$\tilde{c}^{(AFP)} \approx 51.4772$ nM<br>$\tilde{c}^{(PTH)} \approx 88.0534$ nM |
|              |                                                                             | -40   | 2.292 | 2.297 |       |       |       |       |                                                                                                                            |
|              |                                                                             | -30   | 2.312 | 2.297 |       |       |       |       |                                                                                                                            |
|              |                                                                             | -20   | 2.283 | 2.297 |       |       |       |       |                                                                                                                            |
|              |                                                                             | -10   | 2.281 | 2.297 |       |       |       |       |                                                                                                                            |
|              |                                                                             | 0     | 2.275 | 2.297 | 2.297 | 0.000 | 0.000 | 0.000 |                                                                                                                            |
|              |                                                                             | 10    | 2.517 | 2.513 | 2.297 | 0.100 | 0.035 | 0.081 |                                                                                                                            |
|              |                                                                             | 20    | 2.662 | 2.663 | 2.297 | 0.184 | 0.069 | 0.113 |                                                                                                                            |
|              |                                                                             | 30    | 2.765 | 2.779 | 2.297 | 0.256 | 0.100 | 0.126 |                                                                                                                            |
|              |                                                                             | 40    | 2.864 | 2.874 | 2.297 | 0.316 | 0.130 | 0.131 |                                                                                                                            |
|              |                                                                             | 50    | 2.958 | 2.955 | 2.297 | 0.368 | 0.158 | 0.133 |                                                                                                                            |
|              |                                                                             | 60    | 2.995 | 3.026 | 2.297 | 0.411 | 0.184 | 0.133 |                                                                                                                            |
|              |                                                                             | 70    | 3.083 | 3.087 | 2.297 | 0.448 | 0.209 | 0.134 |                                                                                                                            |
|              |                                                                             | 80    | 3.147 | 3.142 | 2.297 | 0.479 | 0.232 | 0.134 |                                                                                                                            |
|              |                                                                             | 90    | 3.204 | 3.190 | 2.297 | 0.505 | 0.254 | 0.134 |                                                                                                                            |
|              |                                                                             | 100   | 3.230 | 3.233 | 2.297 | 0.527 | 0.275 | 0.134 |                                                                                                                            |
|              |                                                                             | 110   | 3.263 | 3.271 | 2.297 | 0.546 | 0.294 | 0.134 |                                                                                                                            |
|              |                                                                             | 120   | 3.305 | 3.306 | 2.297 | 0.562 | 0.313 | 0.134 |                                                                                                                            |
|              |                                                                             | 130   | 3.332 | 3.336 | 2.297 | 0.575 | 0.330 | 0.134 |                                                                                                                            |
|              |                                                                             | 140   | 3.357 | 3.364 | 2.297 | 0.587 | 0.346 | 0.134 |                                                                                                                            |
|              |                                                                             | 150   | 3.360 | 3.389 | 2.297 | 0.597 | 0.362 | 0.134 |                                                                                                                            |
|              |                                                                             | 160   | 3.384 | 3.412 | 2.297 | 0.605 | 0.376 | 0.134 |                                                                                                                            |
|              |                                                                             | 170   | 3.413 | 3.432 | 2.297 | 0.612 | 0.390 | 0.134 |                                                                                                                            |
|              |                                                                             | 180   | 3.456 | 3.451 | 2.297 | 0.617 | 0.402 | 0.134 |                                                                                                                            |
|              |                                                                             | 190   | 3.471 | 3.468 | 2.297 | 0.622 | 0.414 | 0.134 |                                                                                                                            |
|              |                                                                             | 200   | 3.459 | 3.483 | 2.297 | 0.627 | 0.426 | 0.134 |                                                                                                                            |
|              |                                                                             | 210   | 3.488 | 3.497 | 2.297 | 0.630 | 0.436 | 0.134 |                                                                                                                            |
|              |                                                                             | 220   | 3.496 | 3.511 | 2.297 | 0.633 | 0.446 | 0.134 |                                                                                                                            |
|              |                                                                             | 230   | 3.534 | 3.523 | 2.297 | 0.636 | 0.456 | 0.134 |                                                                                                                            |
|              |                                                                             | 240   | 3.532 | 3.534 | 2.297 | 0.638 | 0.465 | 0.134 |                                                                                                                            |
|              |                                                                             | 250   | 3.548 | 3.544 | 2.297 | 0.640 | 0.473 | 0.134 |                                                                                                                            |
|              |                                                                             | 260   | 3.562 | 3.553 | 2.297 | 0.641 | 0.481 | 0.134 |                                                                                                                            |
| 270          | 3.544                                                                       | 3.562 | 2.297 | 0.643 | 0.489 | 0.134 |       |       |                                                                                                                            |
| 280          | 3.564                                                                       | 3.570 | 2.297 | 0.644 | 0.496 | 0.134 |       |       |                                                                                                                            |
| 290          | 3.584                                                                       | 3.578 | 2.297 | 0.645 | 0.502 | 0.134 |       |       |                                                                                                                            |
| 300          | 3.578                                                                       | 3.585 | 2.297 | 0.645 | 0.509 | 0.134 |       |       |                                                                                                                            |
| 310          | 3.590                                                                       | 3.591 | 2.297 | 0.646 | 0.514 | 0.134 |       |       |                                                                                                                            |
| 320          | 3.581                                                                       | 3.597 | 2.297 | 0.647 | 0.520 | 0.134 |       |       |                                                                                                                            |

|  |  |     |       |       |       |       |       |       |  |
|--|--|-----|-------|-------|-------|-------|-------|-------|--|
|  |  | 330 | 3.576 | 3.603 | 2.297 | 0.647 | 0.525 | 0.134 |  |
|  |  | 340 | 3.626 | 3.608 | 2.297 | 0.647 | 0.530 | 0.134 |  |
|  |  | 350 | 3.602 | 3.613 | 2.297 | 0.648 | 0.535 | 0.134 |  |
|  |  | 360 | 3.610 | 3.618 | 2.297 | 0.648 | 0.539 | 0.134 |  |
|  |  | 370 | 3.629 | 3.622 | 2.297 | 0.648 | 0.543 | 0.134 |  |
|  |  | 380 | 3.601 | 3.626 | 2.297 | 0.649 | 0.547 | 0.134 |  |
|  |  | 390 | 3.618 | 3.630 | 2.297 | 0.649 | 0.551 | 0.134 |  |
|  |  | 400 | 3.647 | 3.634 | 2.297 | 0.649 | 0.554 | 0.134 |  |
|  |  | 410 | 3.635 | 3.637 | 2.297 | 0.649 | 0.557 | 0.134 |  |
|  |  | 420 | 3.618 | 3.640 | 2.297 | 0.649 | 0.560 | 0.134 |  |
|  |  | 430 | 3.643 | 3.643 | 2.297 | 0.649 | 0.563 | 0.134 |  |
|  |  | 440 | 3.634 | 3.646 | 2.297 | 0.649 | 0.566 | 0.134 |  |
|  |  | 450 | 3.655 | 3.649 | 2.297 | 0.649 | 0.568 | 0.134 |  |
|  |  | 460 | 3.656 | 3.651 | 2.297 | 0.649 | 0.571 | 0.134 |  |
|  |  | 470 | 3.635 | 3.653 | 2.297 | 0.649 | 0.573 | 0.134 |  |
|  |  | 480 | 3.637 | 3.656 | 2.297 | 0.649 | 0.575 | 0.134 |  |
|  |  | 490 | 3.651 | 3.658 | 2.297 | 0.650 | 0.577 | 0.134 |  |
|  |  | 500 | 3.682 | 3.659 | 2.297 | 0.650 | 0.579 | 0.134 |  |
|  |  | 510 | 3.678 | 3.661 | 2.297 | 0.650 | 0.581 | 0.134 |  |
|  |  | 520 | 3.659 | 3.663 | 2.297 | 0.650 | 0.582 | 0.134 |  |
|  |  | 530 | 3.659 | 3.665 | 2.297 | 0.650 | 0.584 | 0.134 |  |
|  |  | 540 | 3.675 | 3.666 | 2.297 | 0.650 | 0.586 | 0.134 |  |
|  |  | 550 | 3.654 | 3.667 | 2.297 | 0.650 | 0.587 | 0.134 |  |
|  |  | 560 | 3.661 | 3.669 | 2.297 | 0.650 | 0.588 | 0.134 |  |
|  |  | 570 | 3.657 | 3.670 | 2.297 | 0.650 | 0.589 | 0.134 |  |
|  |  | 580 | 3.648 | 3.671 | 2.297 | 0.650 | 0.591 | 0.134 |  |
|  |  | 590 | 3.660 | 3.672 | 2.297 | 0.650 | 0.592 | 0.134 |  |
|  |  | 600 | 3.661 | 3.673 | 2.297 | 0.650 | 0.593 | 0.134 |  |

## References

1. Wang, C.; Wu, J.; He, Y.; Song, Z.; Shi, S.; Zhu, Y.; Jia, Y.; Ye, W., Fully solid-state graphene transistors with striking homogeneity and sensitivity for the practicalization of single-device electronic bioassays. *Nano Lett.* **2019**, *20* (1), 166-175.
2. Huh, S.; Park, J.; Kim, Y. S.; Kim, K. S.; Hong, B. H.; Nam, J.-M., UV/ozone-oxidized large-scale graphene platform with large chemical enhancement in surface-enhanced Raman scattering. *ACS Nano* **2011**, *5* (12), 9799-9806.
3. McDonnell, S.; Pirkle, A.; Kim, J.; Colombo, L.; Wallace, R. M., Trimethyl-aluminum and ozone interactions with graphite in atomic layer deposition of Al<sub>2</sub>O<sub>3</sub>. *J. Appl. Phys.* **2012**, *112* (10), 104110.
4. Wang, C.; Liu, R.; Zhang, W.; Wang, Y.; Xu, K.; Yue, Z.; Liu, G., Multichannel scan surface plasmon resonance biochip with stationary optics and baseline updating capability. *J. Biomed. Opt.* **2013**, *18* (11), 115002-115002.
5. Zuccaro, L.; Tesauro, C.; Kurkina, T.; Fiorani, P.; Yu, H. K.; Knudsen, B. R.; Kern, K.; Desideri, A.; Balasubramanian, K., Real-time label-free direct electronic monitoring of topoisomerase enzyme binding kinetics on graphene. *ACS Nano* **2015**, *9* (11), 11166-11176.
6. Gao, Y.; Wolf, L. K.; Georgiadis, R. M., Secondary structure effects on DNA hybridization kinetics: a solution versus surface comparison. *Nucleic Acids Res.* **2006**, *34* (11), 3370-3377.
